# Supplementary material for: Predicting clinical response to everolimus in ER+ breast cancers using machine-learning
Source: Front Mol Biosci. 2022 Oct 11;9:981962. doi: 10.3389/fmolb.2022.981962 (PMC9592823; doi:10.3389/fmolb.2022.981962)
Supplement: Supplementary file 1 [file Table2.XLSX]

## Sheet: Supp_Table_2
query	significant	p_value	term_size	query_size	intersection_size	precision	recall	term_id	source	term_name	effective_domain_size	source_order	parents
query_1	TRUE	0.00126055	7399	56	38	0.678571	0.00513583	GO:0051716	GO:BP	cellular response to stimulus	21100	16064	c("GO:0009987", "GO:0050896")
query_1	TRUE	0.00324113	420	56	9	0.160714	0.0214286	GO:0006979	GO:BP	response to oxidative stress	21100	2908	GO:0006950
query_1	TRUE	0.00618856	1419	56	15	0.267857	0.0105708	GO:0042981	GO:BP	regulation of apoptotic process	21100	12064	c("GO:0006915", "GO:0043067")
query_1	TRUE	0.00794	1448	56	15	0.267857	0.0103591	GO:0043067	GO:BP	regulation of programmed cell death	21100	12124	c("GO:0010941", "GO:0012501")
query_1	TRUE	0.0108039	13	56	3	0.0535714	0.230769	GO:0006534	GO:BP	cysteine metabolic process	21100	2507	c("GO:0000096", "GO:0009069")
query_1	TRUE	0.01504	2	56	2	0.0357143	1	GO:1904387	GO:BP	cellular response to L-phenylalanine derivative	21100	27362	c("GO:0071417", "GO:1904386")
query_1	TRUE	0.01504	2	56	2	0.0357143	1	GO:0097069	GO:BP	cellular response to thyroxine stimulus	21100	21635	c("GO:0071230", "GO:0071407", "GO:0097067", "GO:0097068", "GO:1904387")
query_1	TRUE	0.016886	274	56	7	0.125	0.0255474	GO:0034599	GO:BP	cellular response to oxidative stress	21100	9974	c("GO:0006979", "GO:0062197")
query_1	TRUE	0.0171233	15	56	3	0.0535714	0.2	GO:0006750	GO:BP	glutathione biosynthetic process	21100	2714	c("GO:0006749", "GO:0019184", "GO:0042398", "GO:0044272")
query_1	TRUE	0.0182873	8885	56	40	0.714286	0.00450197	GO:0050896	GO:BP	response to stimulus	21100	15410	GO:0008150
query_1	TRUE	0.025103	1592	56	15	0.267857	0.00942211	GO:0010941	GO:BP	regulation of cell death	21100	5062	c("GO:0008219", "GO:0050794")
query_1	TRUE	0.0254947	17	56	3	0.0535714	0.176471	GO:0019184	GO:BP	nonribosomal peptide biosynthetic process	21100	6467	GO:0043043
query_1	TRUE	0.0412593	1875	56	16	0.285714	0.00853333	GO:0033554	GO:BP	cellular response to stress	21100	9518	c("GO:0006950", "GO:0051716")
query_1	TRUE	0.0489127	323	56	7	0.125	0.0216718	GO:0062197	GO:BP	cellular response to chemical stress	21100	18583	c("GO:0033554", "GO:0070887")
query_1	FALSE	0.115723	153	56	5	0.0892857	0.0326797	GO:2001236	GO:BP	regulation of extrinsic apoptotic signaling pathway	21100	30400	c("GO:0097191", "GO:2001233")
query_1	FALSE	0.149632	5	56	2	0.0357143	0.4	GO:0097068	GO:BP	response to thyroxine	21100	21634	c("GO:0014070", "GO:0043200", "GO:0097066", "GO:1904386")
query_1	FALSE	0.149632	5	56	2	0.0357143	0.4	GO:0044752	GO:BP	response to human chorionic gonadotropin	21100	12969	GO:0034698
query_1	FALSE	0.15204	849	56	10	0.178571	0.0117786	GO:0016567	GO:BP	protein ubiquitination	21100	5844	GO:0032446
query_1	FALSE	0.160217	1865	56	15	0.267857	0.0080429	GO:0006915	GO:BP	apoptotic process	21100	2855	GO:0012501
query_1	FALSE	0.198489	33	56	3	0.0535714	0.0909091	GO:0006536	GO:BP	glutamate metabolic process	21100	2509	c("GO:0009064", "GO:0043648")
query_1	FALSE	0.198489	33	56	3	0.0535714	0.0909091	GO:0000096	GO:BP	sulfur amino acid metabolic process	21100	54	c("GO:0006082", "GO:0006790", "GO:1901564")
query_1	FALSE	0.208922	1067	56	11	0.196429	0.0103093	GO:0070647	GO:BP	protein modification by small protein conjugation or removal	21100	18983	GO:0006464
query_1	FALSE	0.215731	6451	56	31	0.553571	0.00480546	GO:0023052	GO:BP	signaling	21100	7648	GO:0008150
query_1	FALSE	0.220282	1918	56	15	0.267857	0.00782065	GO:0012501	GO:BP	programmed cell death	21100	5116	GO:0008219
query_1	FALSE	0.224065	6	56	2	0.0357143	0.333333	GO:1903939	GO:BP	regulation of TORC2 signaling	21100	26949	c("GO:0032006", "GO:0038203")
query_1	FALSE	0.224065	6	56	2	0.0357143	0.333333	GO:1904386	GO:BP	response to L-phenylalanine derivative	21100	27361	GO:0010243
query_1	FALSE	0.258769	6508	56	31	0.553571	0.00476337	GO:0007154	GO:BP	cell communication	21100	3054	GO:0009987
query_1	FALSE	0.262656	907	56	10	0.178571	0.0110254	GO:0032446	GO:BP	protein modification by small protein conjugation	21100	8760	GO:0070647
query_1	FALSE	0.278983	97	56	4	0.0714286	0.0412371	GO:2001237	GO:BP	negative regulation of extrinsic apoptotic signaling pathway	21100	30401	c("GO:0097191", "GO:2001234", "GO:2001236")
query_1	FALSE	0.363598	5957	56	29	0.517857	0.00486822	GO:0007165	GO:BP	signal transduction	21100	3065	c("GO:0007154", "GO:0009987", "GO:0023052", "GO:0050794", "GO:0051716")
query_1	FALSE	0.38202	41	56	3	0.0535714	0.0731707	GO:0009069	GO:BP	serine family amino acid metabolic process	21100	3672	GO:1901605
query_1	FALSE	0.453123	110	56	4	0.0714286	0.0363636	GO:1990748	GO:BP	cellular detoxification	21100	29098	c("GO:0009987", "GO:0097237", "GO:0098754")
query_1	FALSE	0.471953	44	56	3	0.0535714	0.0681818	GO:0042398	GO:BP	cellular modified amino acid biosynthetic process	21100	11722	c("GO:0006575", "GO:1901566")
query_1	FALSE	0.526485	2074	56	15	0.267857	0.0072324	GO:0008219	GO:BP	cell death	21100	3560	GO:0009987
query_1	FALSE	0.53501	9	56	2	0.0357143	0.222222	GO:0035733	GO:BP	hepatic stellate cell activation	21100	10589	GO:0072537
query_1	FALSE	0.567822	1624	56	13	0.232143	0.00800493	GO:1901700	GO:BP	response to oxygen-containing compound	21100	24966	GO:0042221
query_1	FALSE	0.592911	118	56	4	0.0714286	0.0338983	GO:0097237	GO:BP	cellular response to toxic substance	21100	21717	c("GO:0009636", "GO:0070887")
query_1	FALSE	0.667623	10	56	2	0.0357143	0.2	GO:0051409	GO:BP	response to nitrosative stress	21100	15825	GO:0006950
query_1	FALSE	0.67333	122	56	4	0.0714286	0.0327869	GO:0042542	GO:BP	response to hydrogen peroxide	21100	11813	c("GO:0000302", "GO:0010035")
query_1	FALSE	0.675247	223	56	5	0.0892857	0.0224215	GO:0097191	GO:BP	extrinsic apoptotic signaling pathway	21100	21695	c("GO:0007166", "GO:0097190")
query_1	FALSE	0.695231	1658	56	13	0.232143	0.00784077	GO:0042592	GO:BP	homeostatic process	21100	11832	GO:0065008
query_1	FALSE	0.789017	505	56	7	0.125	0.0138614	GO:0043065	GO:BP	positive regulation of apoptotic process	21100	12122	c("GO:0006915", "GO:0042981", "GO:0043068")
query_1	FALSE	0.789979	358	56	6	0.107143	0.0167598	GO:2001233	GO:BP	regulation of apoptotic signaling pathway	21100	30397	c("GO:0009966", "GO:0042981", "GO:0097190")
query_1	FALSE	0.793792	231	56	5	0.0892857	0.021645	GO:0009636	GO:BP	response to toxic substance	21100	4004	GO:0042221
query_1	FALSE	0.832456	129	56	4	0.0714286	0.0310078	GO:0071333	GO:BP	cellular response to glucose stimulus	21100	19364	c("GO:0001678", "GO:0009749", "GO:0071331")
query_1	FALSE	0.882464	131	56	4	0.0714286	0.0305344	GO:0071331	GO:BP	cellular response to hexose stimulus	21100	19362	c("GO:0009746", "GO:0071326")
query_1	FALSE	0.918951	518	56	7	0.125	0.0135135	GO:0043068	GO:BP	positive regulation of programmed cell death	21100	12125	c("GO:0010942", "GO:0012501", "GO:0043067")
query_1	FALSE	0.934584	133	56	4	0.0714286	0.0300752	GO:0071326	GO:BP	cellular response to monosaccharide stimulus	21100	19357	c("GO:0034284", "GO:0071322")
query_1	FALSE	0.975847	12	56	2	0.0357143	0.166667	GO:0071372	GO:BP	cellular response to follicle-stimulating hormone stimulus	21100	19401	c("GO:0032354", "GO:0071371")
query_1	FALSE	0.988868	135	56	4	0.0714286	0.0296296	GO:0098754	GO:BP	detoxification	21100	22073	c("GO:0008150", "GO:0009636")
query_1	FALSE	1	9	56	1	0.0178571	0.111111	GO:0097688	GO:BP	glutamate receptor clustering	21100	21911	GO:0072578
query_1	FALSE	1	19	56	1	0.0178571	0.0526316	GO:0140354	GO:BP	lipid import into cell	21100	23072	c("GO:0006869", "GO:0098657")
query_1	FALSE	1	845	56	3	0.0535714	0.0035503	GO:0140352	GO:BP	export from cell	21100	23070	c("GO:0006810", "GO:0009987")
query_1	FALSE	1	27	56	1	0.0178571	0.037037	GO:0090200	GO:BP	positive regulation of release of cytochrome c from mitochondria	21100	21213	c("GO:0001836", "GO:0010822", "GO:0090199")
query_1	FALSE	1	125	56	2	0.0357143	0.016	GO:0090263	GO:BP	positive regulation of canonical Wnt signaling pathway	21100	21275	c("GO:0030177", "GO:0060070", "GO:0060828")
query_1	FALSE	1	4	56	1	0.0178571	0.25	GO:0140213	GO:BP	negative regulation of long-chain fatty acid import into cell	21100	23019	c("GO:0044539", "GO:0140212", "GO:2000192")
query_1	FALSE	1	8	56	1	0.0178571	0.125	GO:0140212	GO:BP	regulation of long-chain fatty acid import into cell	21100	23018	c("GO:0044539", "GO:2000191")
query_1	FALSE	1	5	56	1	0.0178571	0.2	GO:0140206	GO:BP	dipeptide import across plasma membrane	21100	23013	c("GO:0035442", "GO:0140205")
query_1	FALSE	1	5	56	1	0.0178571	0.2	GO:0140205	GO:BP	oligopeptide import across plasma membrane	21100	23012	c("GO:0035672", "GO:0098657", "GO:0098739")
query_1	FALSE	1	301	56	1	0.0178571	0.00332226	GO:0140014	GO:BP	mitotic nuclear division	21100	22948	c("GO:0000280", "GO:1903047")
query_1	FALSE	1	188	56	2	0.0357143	0.0106383	GO:0140013	GO:BP	meiotic nuclear division	21100	22947	c("GO:0000280", "GO:1903046")
query_1	FALSE	1	92	56	1	0.0178571	0.0108696	GO:0090277	GO:BP	positive regulation of peptide hormone secretion	21100	21289	c("GO:0002793", "GO:0030072", "GO:0046887", "GO:0090276")
query_1	FALSE	1	7540	56	20	0.357143	0.00265252	GO:0090304	GO:BP	nucleic acid metabolic process	21100	21315	c("GO:0006139", "GO:0043170")
query_1	FALSE	1	246	56	1	0.0178571	0.00406504	GO:0090305	GO:BP	nucleic acid phosphodiester bond hydrolysis	21100	21316	GO:0090304
query_1	FALSE	1	98	56	1	0.0178571	0.0102041	GO:0120162	GO:BP	positive regulation of cold-induced thermogenesis	21100	22842	c("GO:0009893", "GO:0051240", "GO:0106106", "GO:0120161")
query_1	FALSE	1	147	56	1	0.0178571	0.00680272	GO:0120161	GO:BP	regulation of cold-induced thermogenesis	21100	22841	c("GO:0019222", "GO:0051239", "GO:0065008", "GO:0106106")
query_1	FALSE	1	638	56	2	0.0357143	0.0031348	GO:0120039	GO:BP	plasma membrane bounded cell projection morphogenesis	21100	22778	GO:0048858
query_1	FALSE	1	161	56	1	0.0178571	0.00621118	GO:0090316	GO:BP	positive regulation of intracellular protein transport	21100	21327	c("GO:0006886", "GO:0032388", "GO:0033157", "GO:0051222")
query_1	FALSE	1	1485	56	2	0.0357143	0.0013468	GO:0120036	GO:BP	plasma membrane bounded cell projection organization	21100	22777	GO:0030030
query_1	FALSE	1	619	56	1	0.0178571	0.00161551	GO:0120035	GO:BP	regulation of plasma membrane bounded cell projection organization	21100	22776	c("GO:0031344", "GO:0120036")
query_1	FALSE	1	101	56	1	0.0178571	0.00990099	GO:0110149	GO:BP	regulation of biomineralization	21100	22748	c("GO:0050789", "GO:0110148")
query_1	FALSE	1	179	56	1	0.0178571	0.00558659	GO:0110148	GO:BP	biomineralization	21100	22747	GO:0008150
query_1	FALSE	1	180	56	1	0.0178571	0.00555556	GO:0090276	GO:BP	regulation of peptide hormone secretion	21100	21288	c("GO:0002791", "GO:0030072", "GO:0046883")
query_1	FALSE	1	57	56	1	0.0178571	0.0175439	GO:0140527	GO:BP	reciprocal homologous recombination	21100	23134	GO:0035825
query_1	FALSE	1	394	56	1	0.0178571	0.00253807	GO:0150063	GO:BP	visual system development	21100	23254	GO:0048880
query_1	FALSE	1	147	56	1	0.0178571	0.00680272	GO:0106106	GO:BP	cold-induced thermogenesis	21100	22542	c("GO:0001659", "GO:1990845")
query_1	FALSE	1	38	56	1	0.0178571	0.0263158	GO:0090049	GO:BP	regulation of cell migration involved in sprouting angiogenesis	21100	21074	c("GO:0002042", "GO:0043535")
query_1	FALSE	1	21	56	1	0.0178571	0.047619	GO:0090050	GO:BP	positive regulation of cell migration involved in sprouting angiogenesis	21100	21075	c("GO:0002042", "GO:0043536", "GO:0090049")
query_1	FALSE	1	42	56	2	0.0357143	0.047619	GO:1900744	GO:BP	regulation of p38MAPK cascade	21100	24075	c("GO:0032872", "GO:0038066")
query_1	FALSE	1	491	56	4	0.0714286	0.00814664	GO:0090066	GO:BP	regulation of anatomical structure size	21100	21090	GO:0065008
query_1	FALSE	1	9	56	1	0.0178571	0.111111	GO:1900740	GO:BP	positive regulation of protein insertion into mitochondrial membrane involved in apoptotic signaling pathway	21100	24071	c("GO:0001844", "GO:0090316", "GO:1900739", "GO:1901030", "GO:1903749", "GO:1905477")
query_1	FALSE	1	9	56	1	0.0178571	0.111111	GO:1900739	GO:BP	regulation of protein insertion into mitochondrial membrane involved in apoptotic signaling pathway	21100	24070	c("GO:0001844", "GO:0010821", "GO:0033157", "GO:1903747", "GO:1905475")
query_1	FALSE	1	186	56	1	0.0178571	0.00537634	GO:0090087	GO:BP	regulation of peptide transport	21100	21110	c("GO:0015833", "GO:0051049")
query_1	FALSE	1	159	56	1	0.0178571	0.00628931	GO:0090090	GO:BP	negative regulation of canonical Wnt signaling pathway	21100	21113	c("GO:0030178", "GO:0060070", "GO:0060828")
query_1	FALSE	1	81	56	1	0.0178571	0.0123457	GO:1900407	GO:BP	regulation of cellular response to oxidative stress	21100	23742	c("GO:0034599", "GO:0080135", "GO:1902882")
query_1	FALSE	1	302	56	1	0.0178571	0.00331126	GO:0090130	GO:BP	tissue migration	21100	21149	GO:0032501
query_1	FALSE	1	379	56	1	0.0178571	0.00263852	GO:0140694	GO:BP	non-membrane-bounded organelle assembly	21100	23191	GO:0070925
query_1	FALSE	1	296	56	1	0.0178571	0.00337838	GO:0090132	GO:BP	epithelium migration	21100	21151	GO:0090130
query_1	FALSE	1	489	56	2	0.0357143	0.00408998	GO:0090150	GO:BP	establishment of protein localization to membrane	21100	21168	c("GO:0045184", "GO:0072657")
query_1	FALSE	1	23	56	1	0.0178571	0.0434783	GO:1900273	GO:BP	positive regulation of long-term synaptic potentiation	21100	23611	c("GO:0050806", "GO:0060291", "GO:1900271")
query_1	FALSE	1	45	56	1	0.0178571	0.0222222	GO:1900271	GO:BP	regulation of long-term synaptic potentiation	21100	23609	c("GO:0048167", "GO:0060291")
query_1	FALSE	1	20	56	1	0.0178571	0.05	GO:1900118	GO:BP	negative regulation of execution phase of apoptosis	21100	23466	c("GO:0043066", "GO:0097194", "GO:1900117")
query_1	FALSE	1	35	56	1	0.0178571	0.0285714	GO:0090151	GO:BP	establishment of protein localization to mitochondrial membrane	21100	21169	c("GO:0007006", "GO:0051649", "GO:0072655", "GO:0090150")
query_1	FALSE	1	46	56	1	0.0178571	0.0217391	GO:0090199	GO:BP	regulation of release of cytochrome c from mitochondria	21100	21212	c("GO:0001836", "GO:0010821")
query_1	FALSE	1	28	56	1	0.0178571	0.0357143	GO:1900117	GO:BP	regulation of execution phase of apoptosis	21100	23465	c("GO:0050794", "GO:0097194")
query_1	FALSE	1	14	56	1	0.0178571	0.0714286	GO:1900103	GO:BP	positive regulation of endoplasmic reticulum unfolded protein response	21100	23451	c("GO:0009967", "GO:0030968", "GO:1900101", "GO:1905898")
query_1	FALSE	1	31	56	1	0.0178571	0.0322581	GO:1900101	GO:BP	regulation of endoplasmic reticulum unfolded protein response	21100	23449	c("GO:0009966", "GO:0030968", "GO:1905897")
query_1	FALSE	1	472	56	5	0.0892857	0.0105932	GO:0198738	GO:BP	cell-cell signaling by wnt	21100	23351	GO:0007267
query_1	FALSE	1	14	56	1	0.0178571	0.0714286	GO:1900376	GO:BP	regulation of secondary metabolite biosynthetic process	21100	23714	c("GO:0009889", "GO:0043455", "GO:0044550")
query_1	FALSE	1	6	56	1	0.0178571	0.166667	GO:0106104	GO:BP	regulation of glutamate receptor clustering	21100	22541	c("GO:0097688", "GO:1903909")
query_1	FALSE	1	22	56	1	0.0178571	0.0454545	GO:0090335	GO:BP	regulation of brown fat cell differentiation	21100	21346	c("GO:0045598", "GO:0050873")
query_1	FALSE	1	3580	56	16	0.285714	0.00446927	GO:0097659	GO:BP	nucleic acid-templated transcription	21100	21907	c("GO:0010467", "GO:0032774")
query_1	FALSE	1	17	56	2	0.0357143	0.117647	GO:0097067	GO:BP	cellular response to thyroid hormone stimulus	21100	21633	c("GO:0032870", "GO:0097066")
query_1	FALSE	1	33	56	1	0.0178571	0.030303	GO:0097106	GO:BP	postsynaptic density organization	21100	21659	GO:0099084
query_1	FALSE	1	9	56	1	0.0178571	0.111111	GO:0097113	GO:BP	AMPA glutamate receptor clustering	21100	21663	c("GO:0001941", "GO:0097688")
query_1	FALSE	1	174	56	2	0.0357143	0.0114943	GO:0098739	GO:BP	import across plasma membrane	21100	22065	GO:0055085
query_1	FALSE	1	15	56	1	0.0178571	0.0666667	GO:0098712	GO:BP	L-glutamate import across plasma membrane	21100	22041	c("GO:0015813", "GO:0089718")
query_1	FALSE	1	792	56	2	0.0357143	0.00252525	GO:0098662	GO:BP	inorganic cation transmembrane transport	21100	22015	c("GO:0098655", "GO:0098660")
query_1	FALSE	1	858	56	2	0.0357143	0.002331	GO:0098660	GO:BP	inorganic ion transmembrane transport	21100	22013	GO:0034220
query_1	FALSE	1	8	56	1	0.0178571	0.125	GO:0097119	GO:BP	postsynaptic density protein 95 clustering	21100	21669	c("GO:0001941", "GO:0072657", "GO:0097106")
query_1	FALSE	1	592	56	7	0.125	0.0118243	GO:0097190	GO:BP	apoptotic signaling pathway	21100	21694	c("GO:0006915", "GO:0007165")
query_1	FALSE	1	225	56	2	0.0357143	0.00888889	GO:0098657	GO:BP	import into cell	21100	22010	GO:0006810
query_1	FALSE	1	596	56	3	0.0535714	0.00503356	GO:0098771	GO:BP	inorganic ion homeostasis	21100	22088	GO:0050801
query_1	FALSE	1	250	56	2	0.0357143	0.008	GO:0098656	GO:BP	anion transmembrane transport	21100	22009	c("GO:0006820", "GO:0034220")
query_1	FALSE	1	296	56	3	0.0535714	0.0101351	GO:0097193	GO:BP	intrinsic apoptotic signaling pathway	21100	21697	c("GO:0035556", "GO:0097190")
query_1	FALSE	1	1167	56	1	0.0178571	0.000856898	GO:0098542	GO:BP	defense response to other organism	21100	21990	c("GO:0006952", "GO:0051707")
query_1	FALSE	1	139	56	2	0.0357143	0.0143885	GO:0097746	GO:BP	blood vessel diameter maintenance	21100	21947	c("GO:0003018", "GO:0008015", "GO:0035296")
query_1	FALSE	1	83	56	2	0.0357143	0.0240964	GO:0097194	GO:BP	execution phase of apoptosis	21100	21698	c("GO:0006915", "GO:0009987")
query_1	FALSE	1	237	56	1	0.0178571	0.00421941	GO:0097305	GO:BP	response to alcohol	21100	21763	c("GO:0010033", "GO:1901700")
query_1	FALSE	1	92	56	1	0.0178571	0.0108696	GO:0097306	GO:BP	cellular response to alcohol	21100	21764	c("GO:0071310", "GO:0097305", "GO:1901701")
query_1	FALSE	1	39	56	2	0.0357143	0.0512821	GO:0097345	GO:BP	mitochondrial outer membrane permeabilization	21100	21796	c("GO:0097190", "GO:1902110")
query_1	FALSE	1	28	56	1	0.0178571	0.0357143	GO:0097421	GO:BP	liver regeneration	21100	21834	c("GO:0001889", "GO:0031100")
query_1	FALSE	1	778	56	3	0.0535714	0.00385604	GO:0097435	GO:BP	supramolecular fiber organization	21100	21838	GO:0016043
query_1	FALSE	1	165	56	1	0.0178571	0.00606061	GO:0097553	GO:BP	calcium ion transmembrane import into cytosol	21100	21882	GO:0070588
query_1	FALSE	1	903	56	2	0.0357143	0.00221484	GO:0098655	GO:BP	cation transmembrane transport	21100	22008	c("GO:0006812", "GO:0034220")
query_1	FALSE	1	328	56	3	0.0535714	0.00914634	GO:0104004	GO:BP	cellular response to environmental stimulus	21100	22485	GO:0051716
query_1	FALSE	1	29	56	2	0.0357143	0.0689655	GO:0097066	GO:BP	response to thyroid hormone	21100	21632	GO:0009725
query_1	FALSE	1	40	56	1	0.0178571	0.025	GO:0097009	GO:BP	energy homeostasis	21100	21593	GO:0048871
query_1	FALSE	1	16	56	1	0.0178571	0.0625	GO:0090336	GO:BP	positive regulation of brown fat cell differentiation	21100	21347	c("GO:0045600", "GO:0050873", "GO:0090335")
query_1	FALSE	1	83	56	1	0.0178571	0.0120482	GO:0090398	GO:BP	cellular senescence	21100	21404	c("GO:0033554", "GO:0044237")
query_1	FALSE	1	63	56	1	0.0178571	0.015873	GO:0099601	GO:BP	regulation of neurotransmitter receptor activity	21100	22373	GO:0010469
query_1	FALSE	1	561	56	1	0.0178571	0.00178253	GO:0090407	GO:BP	organophosphate biosynthetic process	21100	21410	c("GO:0019637", "GO:1901576")
query_1	FALSE	1	5	56	1	0.0178571	0.2	GO:0090461	GO:BP	glutamate homeostasis	21100	21444	c("GO:0055081", "GO:0080144")
query_1	FALSE	1	717	56	2	0.0357143	0.0027894	GO:0099537	GO:BP	trans-synaptic signaling	21100	22332	GO:0099536
query_1	FALSE	1	13	56	1	0.0178571	0.0769231	GO:0090481	GO:BP	pyrimidine nucleotide-sugar transmembrane transport	21100	21455	GO:0015780
query_1	FALSE	1	156	56	1	0.0178571	0.00641026	GO:0090501	GO:BP	RNA phosphodiester bond hydrolysis	21100	21464	c("GO:0016070", "GO:0090305")
query_1	FALSE	1	740	56	2	0.0357143	0.0027027	GO:0099536	GO:BP	synaptic signaling	21100	22331	GO:0007267
query_1	FALSE	1	70	56	1	0.0178571	0.0142857	GO:0099518	GO:BP	vesicle cytoskeletal trafficking	21100	22323	c("GO:0030705", "GO:0051650")
query_1	FALSE	1	21	56	1	0.0178571	0.047619	GO:0098780	GO:BP	response to mitochondrial depolarisation	21100	22095	GO:0033554
query_1	FALSE	1	76	56	2	0.0357143	0.0263158	GO:0090559	GO:BP	regulation of membrane permeability	21100	21500	GO:0065008
query_1	FALSE	1	2	56	1	0.0178571	0.5	GO:0099403	GO:BP	maintenance of mitotic sister chromatid cohesion, telomeric	21100	22312	c("GO:0034088", "GO:0099404")
query_1	FALSE	1	442	56	2	0.0357143	0.00452489	GO:0099177	GO:BP	regulation of trans-synaptic signaling	21100	22301	c("GO:0010646", "GO:0023051", "GO:0099537")
query_1	FALSE	1	85	56	1	0.0178571	0.0117647	GO:0099175	GO:BP	regulation of postsynapse organization	21100	22299	c("GO:0050807", "GO:0099173")
query_1	FALSE	1	15	56	1	0.0178571	0.0666667	GO:0090594	GO:BP	inflammatory response to wounding	21100	21506	c("GO:0006954", "GO:0009611")
query_1	FALSE	1	164	56	2	0.0357143	0.0121951	GO:0099173	GO:BP	postsynapse organization	21100	22297	c("GO:0016043", "GO:0050808")
query_1	FALSE	1	35	56	1	0.0178571	0.0285714	GO:0099084	GO:BP	postsynaptic specialization organization	21100	22250	c("GO:0006996", "GO:0099173")
query_1	FALSE	1	709	56	2	0.0357143	0.00282087	GO:0098916	GO:BP	anterograde trans-synaptic signaling	21100	22162	GO:0099537
query_1	FALSE	1	70	56	1	0.0178571	0.0142857	GO:0097006	GO:BP	regulation of plasma lipoprotein particle levels	21100	21592	GO:0050789
query_1	FALSE	1	95	56	3	0.0535714	0.0315789	GO:0098869	GO:BP	cellular oxidant detoxification	21100	22133	GO:1990748
query_1	FALSE	1	284	56	1	0.0178571	0.00352113	GO:0098813	GO:BP	nuclear chromosome segregation	21100	22109	c("GO:0007059", "GO:0022402")
query_1	FALSE	1	2	56	1	0.0178571	0.5	GO:0099404	GO:BP	mitotic sister chromatid cohesion, telomeric	21100	22313	GO:0007064
query_1	FALSE	1	913	56	2	0.0357143	0.00219058	GO:0098609	GO:BP	cell-cell adhesion	21100	22001	GO:0007155
query_1	FALSE	1	1527	56	2	0.0357143	0.00130976	GO:0000003	GO:BP	reproduction	21100	3	GO:0008150
query_1	FALSE	1	62	56	1	0.0178571	0.016129	GO:1901016	GO:BP	regulation of potassium ion transmembrane transporter activity	21100	24341	c("GO:0032412", "GO:1901379")
query_1	FALSE	1	45	56	2	0.0357143	0.0444444	GO:1903432	GO:BP	regulation of TORC1 signaling	21100	26492	c("GO:0032006", "GO:0038202")
query_1	FALSE	1	3452	56	16	0.285714	0.00463499	GO:1903506	GO:BP	regulation of nucleic acid-templated transcription	21100	26560	c("GO:0097659", "GO:2001141")
query_1	FALSE	1	1295	56	5	0.0892857	0.003861	GO:1903507	GO:BP	negative regulation of nucleic acid-templated transcription	21100	26561	c("GO:0097659", "GO:1902679", "GO:1903506")
query_1	FALSE	1	1636	56	9	0.160714	0.00550122	GO:1903508	GO:BP	positive regulation of nucleic acid-templated transcription	21100	26562	c("GO:0097659", "GO:1902680", "GO:1903506")
query_1	FALSE	1	89	56	1	0.0178571	0.011236	GO:1903510	GO:BP	mucopolysaccharide metabolic process	21100	26564	GO:0030203
query_1	FALSE	1	547	56	2	0.0357143	0.00365631	GO:1903530	GO:BP	regulation of secretion by cell	21100	26584	c("GO:0032940", "GO:0050794", "GO:0051046")
query_1	FALSE	1	158	56	1	0.0178571	0.00632911	GO:1903364	GO:BP	positive regulation of cellular protein catabolic process	21100	26430	c("GO:0031331", "GO:0032270", "GO:0044257", "GO:0045732", "GO:1903362")
query_1	FALSE	1	137	56	1	0.0178571	0.00729927	GO:1903531	GO:BP	negative regulation of secretion by cell	21100	26585	c("GO:0032940", "GO:0048523", "GO:0051048", "GO:1903530")
query_1	FALSE	1	17	56	1	0.0178571	0.0588235	GO:1903587	GO:BP	regulation of blood vessel endothelial cell proliferation involved in sprouting angiogenesis	21100	26639	c("GO:0001936", "GO:0002043")
query_1	FALSE	1	9	56	1	0.0178571	0.111111	GO:1903589	GO:BP	positive regulation of blood vessel endothelial cell proliferation involved in sprouting angiogenesis	21100	26641	c("GO:0001938", "GO:0002043", "GO:1903587")
query_1	FALSE	1	374	56	1	0.0178571	0.0026738	GO:1903706	GO:BP	regulation of hemopoiesis	21100	26755	c("GO:0002682", "GO:0030097", "GO:2000026")
query_1	FALSE	1	160	56	1	0.0178571	0.00625	GO:1903708	GO:BP	positive regulation of hemopoiesis	21100	26757	c("GO:0002684", "GO:0030097", "GO:0051094", "GO:0051240", "GO:1903706")
query_1	FALSE	1	54	56	1	0.0178571	0.0185185	GO:1903747	GO:BP	regulation of establishment of protein localization to mitochondrion	21100	26785	c("GO:0060341", "GO:0070201", "GO:0072655")
query_1	FALSE	1	40	56	1	0.0178571	0.025	GO:1903749	GO:BP	positive regulation of establishment of protein localization to mitochondrion	21100	26787	c("GO:0048522", "GO:0072655", "GO:1903747", "GO:1904951")
query_1	FALSE	1	275	56	1	0.0178571	0.00363636	GO:1903532	GO:BP	positive regulation of secretion by cell	21100	26586	c("GO:0032940", "GO:0048522", "GO:0051047", "GO:1903530")
query_1	FALSE	1	2	56	1	0.0178571	0.5	GO:1903786	GO:BP	regulation of glutathione biosynthetic process	21100	26816	c("GO:0006750", "GO:0031326", "GO:0034248", "GO:0042762")
query_1	FALSE	1	80	56	1	0.0178571	0.0125	GO:1903363	GO:BP	negative regulation of cellular protein catabolic process	21100	26429	c("GO:0031330", "GO:0032269", "GO:0042177", "GO:0044257", "GO:1903362")
query_1	FALSE	1	96	56	3	0.0535714	0.03125	GO:1903321	GO:BP	negative regulation of protein modification by small protein conjugation or removal	21100	26388	c("GO:0031400", "GO:0070647", "GO:1903320")
query_1	FALSE	1	229	56	2	0.0357143	0.00873362	GO:1903050	GO:BP	regulation of proteolysis involved in cellular protein catabolic process	21100	26163	c("GO:0030162", "GO:0051603", "GO:1903362")
query_1	FALSE	1	67	56	1	0.0178571	0.0149254	GO:1903051	GO:BP	negative regulation of proteolysis involved in cellular protein catabolic process	21100	26164	c("GO:0045861", "GO:0051603", "GO:1903050", "GO:1903363")
query_1	FALSE	1	136	56	1	0.0178571	0.00735294	GO:1903052	GO:BP	positive regulation of proteolysis involved in cellular protein catabolic process	21100	26165	c("GO:0045862", "GO:0051603", "GO:1903050", "GO:1903364")
query_1	FALSE	1	11	56	1	0.0178571	0.0909091	GO:1903059	GO:BP	regulation of protein lipidation	21100	26172	c("GO:0006497", "GO:0031399", "GO:0050746", "GO:2000112")
query_1	FALSE	1	104	56	1	0.0178571	0.00961538	GO:1903076	GO:BP	regulation of protein localization to plasma membrane	21100	26189	c("GO:0072659", "GO:1904375", "GO:1905475")
query_1	FALSE	1	60	56	1	0.0178571	0.0166667	GO:1903078	GO:BP	positive regulation of protein localization to plasma membrane	21100	26191	c("GO:0072659", "GO:1903076", "GO:1904377", "GO:1905477")
query_1	FALSE	1	264	56	2	0.0357143	0.00757576	GO:1903362	GO:BP	regulation of cellular protein catabolic process	21100	26428	c("GO:0031329", "GO:0032268", "GO:0042176", "GO:0044257")
query_1	FALSE	1	440	56	1	0.0178571	0.00227273	GO:1903131	GO:BP	mononuclear cell differentiation	21100	26236	GO:0002521
query_1	FALSE	1	47	56	1	0.0178571	0.0212766	GO:1903202	GO:BP	negative regulation of oxidative stress-induced cell death	21100	26284	c("GO:0036473", "GO:0060548", "GO:1903201")
query_1	FALSE	1	29	56	1	0.0178571	0.0344828	GO:1903203	GO:BP	regulation of oxidative stress-induced neuron death	21100	26285	c("GO:0036475", "GO:1901214", "GO:1903201")
query_1	FALSE	1	20	56	1	0.0178571	0.05	GO:1903204	GO:BP	negative regulation of oxidative stress-induced neuron death	21100	26286	c("GO:0036475", "GO:1901215", "GO:1903202", "GO:1903203")
query_1	FALSE	1	145	56	1	0.0178571	0.00689655	GO:1903305	GO:BP	regulation of regulated secretory pathway	21100	26375	c("GO:0017157", "GO:0045055")
query_1	FALSE	1	24	56	1	0.0178571	0.0416667	GO:1903306	GO:BP	negative regulation of regulated secretory pathway	21100	26376	c("GO:0045055", "GO:0045920", "GO:1903305")
query_1	FALSE	1	246	56	3	0.0535714	0.0121951	GO:1903320	GO:BP	regulation of protein modification by small protein conjugation or removal	21100	26387	c("GO:0031399", "GO:0070647")
query_1	FALSE	1	70	56	1	0.0178571	0.0142857	GO:1903201	GO:BP	regulation of oxidative stress-induced cell death	21100	26283	c("GO:0010941", "GO:0036473", "GO:1900407")
query_1	FALSE	1	755	56	2	0.0357143	0.00264901	GO:1903047	GO:BP	mitotic cell cycle process	21100	26160	c("GO:0000278", "GO:0022402")
query_1	FALSE	1	150	56	2	0.0357143	0.0133333	GO:1903825	GO:BP	organic acid transmembrane transport	21100	26849	c("GO:0015849", "GO:0055085")
query_1	FALSE	1	15	56	1	0.0178571	0.0666667	GO:1903894	GO:BP	regulation of IRE1-mediated unfolded protein response	21100	26905	c("GO:0036498", "GO:1900101")
query_1	FALSE	1	108	56	1	0.0178571	0.00925926	GO:1904659	GO:BP	glucose transmembrane transport	21100	27607	GO:0008645
query_1	FALSE	1	56	56	1	0.0178571	0.0178571	GO:1904705	GO:BP	regulation of vascular associated smooth muscle cell proliferation	21100	27650	c("GO:0048660", "GO:1990874")
query_1	FALSE	1	23	56	1	0.0178571	0.0434783	GO:1904706	GO:BP	negative regulation of vascular associated smooth muscle cell proliferation	21100	27651	c("GO:0048662", "GO:1904705", "GO:1990874")
query_1	FALSE	1	6	56	1	0.0178571	0.166667	GO:1904717	GO:BP	regulation of AMPA glutamate receptor clustering	21100	27661	c("GO:0097113", "GO:0106104")
query_1	FALSE	1	4	56	1	0.0178571	0.25	GO:1904742	GO:BP	regulation of telomeric DNA binding	21100	27684	GO:0051101
query_1	FALSE	1	2	56	1	0.0178571	0.5	GO:1904743	GO:BP	negative regulation of telomeric DNA binding	21100	27685	c("GO:0043392", "GO:1904742")
query_1	FALSE	1	5	56	1	0.0178571	0.2	GO:1904515	GO:BP	positive regulation of TORC2 signaling	21100	27476	c("GO:0032008", "GO:0038203", "GO:1903939")
query_1	FALSE	1	5	56	1	0.0178571	0.2	GO:1904760	GO:BP	regulation of myofibroblast differentiation	21100	27702	c("GO:0036446", "GO:0045595")
query_1	FALSE	1	3	56	1	0.0178571	0.333333	GO:1904886	GO:BP	beta-catenin destruction complex disassembly	21100	27815	c("GO:0032984", "GO:0060070")
query_1	FALSE	1	2	56	1	0.0178571	0.5	GO:1904907	GO:BP	regulation of maintenance of mitotic sister chromatid cohesion, telomeric	21100	27836	c("GO:0034182", "GO:0099403")
query_1	FALSE	1	2	56	1	0.0178571	0.5	GO:1904908	GO:BP	negative regulation of maintenance of mitotic sister chromatid cohesion, telomeric	21100	27837	c("GO:0034183", "GO:0099403", "GO:1904907")
query_1	FALSE	1	316	56	2	0.0357143	0.00632911	GO:1904951	GO:BP	positive regulation of establishment of protein localization	21100	27875	c("GO:0045184", "GO:0070201", "GO:1903829")
query_1	FALSE	1	113	56	2	0.0357143	0.0176991	GO:1905037	GO:BP	autophagosome organization	21100	27959	c("GO:0007033", "GO:0016236")
query_1	FALSE	1	149	56	2	0.0357143	0.0134228	GO:1905039	GO:BP	carboxylic acid transmembrane transport	21100	27961	GO:1903825
query_1	FALSE	1	4	56	1	0.0178571	0.25	GO:1904761	GO:BP	negative regulation of myofibroblast differentiation	21100	27703	c("GO:0036446", "GO:0045596", "GO:1904760")
query_1	FALSE	1	457	56	3	0.0535714	0.00656455	GO:1903829	GO:BP	positive regulation of protein localization	21100	26852	c("GO:0008104", "GO:0032880", "GO:0048518")
query_1	FALSE	1	67	56	1	0.0178571	0.0149254	GO:1904377	GO:BP	positive regulation of protein localization to cell periphery	21100	27352	c("GO:0048522", "GO:1903829", "GO:1904375", "GO:1990778")
query_1	FALSE	1	37	56	1	0.0178571	0.027027	GO:1904358	GO:BP	positive regulation of telomere maintenance via telomere lengthening	21100	27333	c("GO:0010833", "GO:0032206", "GO:1904356")
query_1	FALSE	1	8	56	1	0.0178571	0.125	GO:1903896	GO:BP	positive regulation of IRE1-mediated unfolded protein response	21100	26907	c("GO:0036498", "GO:1900103", "GO:1903894")
query_1	FALSE	1	14	56	1	0.0178571	0.0714286	GO:1903909	GO:BP	regulation of receptor clustering	21100	26920	c("GO:0043113", "GO:1905475")
query_1	FALSE	1	1	56	1	0.0178571	1	GO:1903940	GO:BP	negative regulation of TORC2 signaling	21100	26950	c("GO:0032007", "GO:0038203", "GO:1903939")
query_1	FALSE	1	162	56	1	0.0178571	0.00617284	GO:1904018	GO:BP	positive regulation of vasculature development	21100	27016	c("GO:0001944", "GO:0051094", "GO:0051240", "GO:1901342")
query_1	FALSE	1	113	56	1	0.0178571	0.00884956	GO:1904019	GO:BP	epithelial cell apoptotic process	21100	27017	GO:0006915
query_1	FALSE	1	90	56	1	0.0178571	0.0111111	GO:1904035	GO:BP	regulation of epithelial cell apoptotic process	21100	27033	c("GO:0042981", "GO:1904019")
query_1	FALSE	1	125	56	1	0.0178571	0.008	GO:1904375	GO:BP	regulation of protein localization to cell periphery	21100	27350	c("GO:0032880", "GO:0060341", "GO:1990778")
query_1	FALSE	1	49	56	1	0.0178571	0.0204082	GO:1904036	GO:BP	negative regulation of epithelial cell apoptotic process	21100	27034	c("GO:0043066", "GO:1904019", "GO:1904035")
query_1	FALSE	1	19	56	1	0.0178571	0.0526316	GO:1904262	GO:BP	negative regulation of TORC1 signaling	21100	27242	c("GO:0032007", "GO:0038202", "GO:1903432")
query_1	FALSE	1	21	56	1	0.0178571	0.047619	GO:1904263	GO:BP	positive regulation of TORC1 signaling	21100	27243	c("GO:0032008", "GO:0038202", "GO:1903432")
query_1	FALSE	1	26	56	1	0.0178571	0.0384615	GO:1904353	GO:BP	regulation of telomere capping	21100	27328	c("GO:0016233", "GO:0032204")
query_1	FALSE	1	17	56	1	0.0178571	0.0588235	GO:1904355	GO:BP	positive regulation of telomere capping	21100	27330	c("GO:0016233", "GO:0032206", "GO:1904353")
query_1	FALSE	1	63	56	1	0.0178571	0.015873	GO:1904356	GO:BP	regulation of telomere maintenance via telomere lengthening	21100	27331	c("GO:0010833", "GO:0032204")
query_1	FALSE	1	29	56	1	0.0178571	0.0344828	GO:1904357	GO:BP	negative regulation of telomere maintenance via telomere lengthening	21100	27332	c("GO:0010833", "GO:0032205", "GO:1904356")
query_1	FALSE	1	358	56	1	0.0178571	0.0027933	GO:1904062	GO:BP	regulation of cation transmembrane transport	21100	27059	c("GO:0034765", "GO:0098655")
query_1	FALSE	1	207	56	2	0.0357143	0.00966184	GO:1903046	GO:BP	meiotic cell cycle process	21100	26159	c("GO:0022402", "GO:0022414", "GO:0051321")
query_1	FALSE	1	242	56	1	0.0178571	0.00413223	GO:1903039	GO:BP	positive regulation of leukocyte cell-cell adhesion	21100	26152	c("GO:0007159", "GO:0022409", "GO:1903037")
query_1	FALSE	1	334	56	1	0.0178571	0.00299401	GO:1903037	GO:BP	regulation of leukocyte cell-cell adhesion	21100	26150	c("GO:0007159", "GO:0022407")
query_1	FALSE	1	1350	56	8	0.142857	0.00592593	GO:1901565	GO:BP	organonitrogen compound catabolic process	21100	24854	c("GO:1901564", "GO:1901575")
query_1	FALSE	1	1708	56	6	0.107143	0.00351288	GO:1901566	GO:BP	organonitrogen compound biosynthetic process	21100	24855	c("GO:1901564", "GO:1901576")
query_1	FALSE	1	2103	56	10	0.178571	0.00475511	GO:1901575	GO:BP	organic substance catabolic process	21100	24863	c("GO:0009056", "GO:0071704")
query_1	FALSE	1	5774	56	23	0.410714	0.00398337	GO:1901576	GO:BP	organic substance biosynthetic process	21100	24864	c("GO:0009058", "GO:0071704")
query_1	FALSE	1	205	56	3	0.0535714	0.0146341	GO:1901605	GO:BP	alpha-amino acid metabolic process	21100	24886	GO:0006520
query_1	FALSE	1	559	56	1	0.0178571	0.00178891	GO:1901615	GO:BP	organic hydroxy compound metabolic process	21100	24894	GO:0071704
query_1	FALSE	1	6446	56	26	0.464286	0.00403351	GO:1901564	GO:BP	organonitrogen compound metabolic process	21100	24853	c("GO:0006807", "GO:0071704")
query_1	FALSE	1	236	56	1	0.0178571	0.00423729	GO:1901617	GO:BP	organic hydroxy compound biosynthetic process	21100	24896	c("GO:1901576", "GO:1901615")
query_1	FALSE	1	349	56	2	0.0357143	0.00573066	GO:1901653	GO:BP	cellular response to peptide	21100	24929	c("GO:0071417", "GO:1901652", "GO:1901701")
query_1	FALSE	1	193	56	1	0.0178571	0.00518135	GO:1901654	GO:BP	response to ketone	21100	24930	c("GO:0010033", "GO:1901700")
query_1	FALSE	1	14	56	1	0.0178571	0.0714286	GO:1901678	GO:BP	iron coordination entity transport	21100	24952	GO:0006826
query_1	FALSE	1	1100	56	5	0.0892857	0.00454545	GO:1901698	GO:BP	response to nitrogen compound	21100	24964	GO:0042221
query_1	FALSE	1	683	56	3	0.0535714	0.00439239	GO:1901699	GO:BP	cellular response to nitrogen compound	21100	24965	c("GO:0070887", "GO:1901698")
query_1	FALSE	1	1166	56	9	0.160714	0.0077187	GO:1901701	GO:BP	cellular response to oxygen-containing compound	21100	24967	c("GO:0070887", "GO:1901700")
query_1	FALSE	1	477	56	3	0.0535714	0.00628931	GO:1901652	GO:BP	response to peptide	21100	24928	c("GO:0010243", "GO:1901700")
query_1	FALSE	1	104	56	1	0.0178571	0.00961538	GO:1901796	GO:BP	regulation of signal transduction by p53 class mediator	21100	25060	c("GO:0072331", "GO:1902531")
query_1	FALSE	1	11	56	1	0.0178571	0.0909091	GO:1901533	GO:BP	negative regulation of hematopoietic progenitor cell differentiation	21100	24823	c("GO:0002244", "GO:0045596", "GO:1901532")
query_1	FALSE	1	1	56	1	0.0178571	1	GO:1901494	GO:BP	regulation of cysteine metabolic process	21100	24789	c("GO:0006521", "GO:0006534", "GO:0031335")
query_1	FALSE	1	28	56	2	0.0357143	0.0714286	GO:1901028	GO:BP	regulation of mitochondrial outer membrane permeabilization involved in apoptotic signaling pathway	21100	24353	c("GO:0010821", "GO:0046902", "GO:0051049", "GO:0097345")
query_1	FALSE	1	10	56	1	0.0178571	0.1	GO:1901029	GO:BP	negative regulation of mitochondrial outer membrane permeabilization involved in apoptotic signaling pathway	21100	24354	c("GO:0010823", "GO:0035795", "GO:0097345", "GO:1901028", "GO:2001234")
query_1	FALSE	1	17	56	1	0.0178571	0.0588235	GO:1901030	GO:BP	positive regulation of mitochondrial outer membrane permeabilization involved in apoptotic signaling pathway	21100	24355	c("GO:0010822", "GO:0035794", "GO:0051050", "GO:0097345", "GO:1901028")
query_1	FALSE	1	1031	56	1	0.0178571	0.000969932	GO:1901135	GO:BP	carbohydrate derivative metabolic process	21100	24457	GO:0071704
query_1	FALSE	1	612	56	1	0.0178571	0.00163399	GO:1901137	GO:BP	carbohydrate derivative biosynthetic process	21100	24459	c("GO:1901135", "GO:1901576")
query_1	FALSE	1	312	56	5	0.0892857	0.0160256	GO:1901214	GO:BP	regulation of neuron death	21100	24533	c("GO:0010941", "GO:0070997")
query_1	FALSE	1	56	56	1	0.0178571	0.0178571	GO:1901532	GO:BP	regulation of hematopoietic progenitor cell differentiation	21100	24822	c("GO:0002244", "GO:0045595")
query_1	FALSE	1	208	56	4	0.0714286	0.0192308	GO:1901215	GO:BP	negative regulation of neuron death	21100	24534	c("GO:0060548", "GO:0070997", "GO:1901214")
query_1	FALSE	1	82	56	1	0.0178571	0.0121951	GO:1901264	GO:BP	carbohydrate derivative transport	21100	24574	GO:0071702
query_1	FALSE	1	9	56	1	0.0178571	0.111111	GO:1901334	GO:BP	lactone metabolic process	21100	24641	c("GO:0046483", "GO:1901360")
query_1	FALSE	1	287	56	1	0.0178571	0.00348432	GO:1901342	GO:BP	regulation of vasculature development	21100	24648	c("GO:0001944", "GO:2000026")
query_1	FALSE	1	8461	56	22	0.392857	0.00260017	GO:1901360	GO:BP	organic cyclic compound metabolic process	21100	24665	GO:0071704
query_1	FALSE	1	530	56	1	0.0178571	0.00188679	GO:1901361	GO:BP	organic cyclic compound catabolic process	21100	24666	c("GO:1901360", "GO:1901575")
query_1	FALSE	1	88	56	1	0.0178571	0.0113636	GO:1901379	GO:BP	regulation of potassium ion transmembrane transport	21100	24681	c("GO:0043266", "GO:0071805", "GO:1904062")
query_1	FALSE	1	86	56	1	0.0178571	0.0116279	GO:1901216	GO:BP	positive regulation of neuron death	21100	24535	c("GO:0010942", "GO:0070997", "GO:1901214")
query_1	FALSE	1	34	56	1	0.0178571	0.0294118	GO:1901797	GO:BP	negative regulation of signal transduction by p53 class mediator	21100	25061	c("GO:0072331", "GO:1901796", "GO:1902532")
query_1	FALSE	1	51	56	1	0.0178571	0.0196078	GO:1901799	GO:BP	negative regulation of proteasomal protein catabolic process	21100	25063	c("GO:0010498", "GO:0061136", "GO:1903051")
query_1	FALSE	1	118	56	1	0.0178571	0.00847458	GO:1901800	GO:BP	positive regulation of proteasomal protein catabolic process	21100	25064	c("GO:0010498", "GO:0061136", "GO:1903052")
query_1	FALSE	1	63	56	1	0.0178571	0.015873	GO:1902305	GO:BP	regulation of sodium ion transmembrane transport	21100	25535	c("GO:0002028", "GO:0035725", "GO:1904062")
query_1	FALSE	1	66	56	1	0.0178571	0.0151515	GO:1902475	GO:BP	L-alpha-amino acid transmembrane transport	21100	25676	GO:0003333
query_1	FALSE	1	1691	56	10	0.178571	0.00591366	GO:1902531	GO:BP	regulation of intracellular signal transduction	21100	25711	c("GO:0009966", "GO:0035556")
query_1	FALSE	1	508	56	2	0.0357143	0.00393701	GO:1902532	GO:BP	negative regulation of intracellular signal transduction	21100	25712	c("GO:0009968", "GO:0035556", "GO:1902531")
query_1	FALSE	1	975	56	5	0.0892857	0.00512821	GO:1902533	GO:BP	positive regulation of intracellular signal transduction	21100	25713	c("GO:0009967", "GO:0035556", "GO:1902531")
query_1	FALSE	1	1297	56	5	0.0892857	0.00385505	GO:1902679	GO:BP	negative regulation of RNA biosynthetic process	21100	25829	c("GO:0010558", "GO:0031327", "GO:0032774", "GO:0051253", "GO:2001141")
query_1	FALSE	1	11	56	1	0.0178571	0.0909091	GO:1902237	GO:BP	positive regulation of endoplasmic reticulum stress-induced intrinsic apoptotic signaling pathway	21100	25477	c("GO:0070059", "GO:1902235", "GO:1905898", "GO:2001244")
query_1	FALSE	1	1642	56	9	0.160714	0.00548112	GO:1902680	GO:BP	positive regulation of RNA biosynthetic process	21100	25830	c("GO:0010557", "GO:0031328", "GO:0032774", "GO:0051254", "GO:2001141")
query_1	FALSE	1	129	56	1	0.0178571	0.00775194	GO:1902749	GO:BP	regulation of cell cycle G2/M phase transition	21100	25884	c("GO:0044839", "GO:1901987")
query_1	FALSE	1	83	56	1	0.0178571	0.0120482	GO:1902750	GO:BP	negative regulation of cell cycle G2/M phase transition	21100	25885	c("GO:0044839", "GO:1901988", "GO:1902749")
query_1	FALSE	1	157	56	1	0.0178571	0.00636943	GO:1902850	GO:BP	microtubule cytoskeleton organization involved in mitosis	21100	25976	c("GO:0000226", "GO:1903047")
query_1	FALSE	1	90	56	1	0.0178571	0.0111111	GO:1902882	GO:BP	regulation of response to oxidative stress	21100	26005	c("GO:0006979", "GO:0080134")
query_1	FALSE	1	2	56	1	0.0178571	0.5	GO:1902897	GO:BP	regulation of postsynaptic density protein 95 clustering	21100	26020	c("GO:0097119", "GO:1905475", "GO:1905874")
query_1	FALSE	1	127	56	2	0.0357143	0.015748	GO:1903008	GO:BP	organelle disassembly	21100	26123	c("GO:0006996", "GO:0022411")
query_1	FALSE	1	44	56	2	0.0357143	0.0454545	GO:1902686	GO:BP	mitochondrial outer membrane permeabilization involved in programmed cell death	21100	25836	c("GO:0012501", "GO:0035794")
query_1	FALSE	1	33	56	1	0.0178571	0.030303	GO:1902235	GO:BP	regulation of endoplasmic reticulum stress-induced intrinsic apoptotic signaling pathway	21100	25475	c("GO:0070059", "GO:1905897", "GO:2001242")
query_1	FALSE	1	80	56	1	0.0178571	0.0125	GO:1902117	GO:BP	positive regulation of organelle assembly	21100	25367	c("GO:0010638", "GO:0044089", "GO:0070925", "GO:1902115")
query_1	FALSE	1	203	56	1	0.0178571	0.00492611	GO:1902115	GO:BP	regulation of organelle assembly	21100	25365	c("GO:0033043", "GO:0044087", "GO:0070925")
query_1	FALSE	1	84	56	1	0.0178571	0.0119048	GO:1901983	GO:BP	regulation of protein acetylation	21100	25241	c("GO:0006473", "GO:0031399")
query_1	FALSE	1	47	56	1	0.0178571	0.0212766	GO:1901985	GO:BP	positive regulation of protein acetylation	21100	25243	c("GO:0006473", "GO:0031401", "GO:1901983")
query_1	FALSE	1	414	56	1	0.0178571	0.00241546	GO:1901987	GO:BP	regulation of cell cycle phase transition	21100	25245	c("GO:0010564", "GO:0044770")
query_1	FALSE	1	261	56	1	0.0178571	0.00383142	GO:1901988	GO:BP	negative regulation of cell cycle phase transition	21100	25246	c("GO:0010948", "GO:0044770", "GO:1901987")
query_1	FALSE	1	320	56	1	0.0178571	0.003125	GO:1901990	GO:BP	regulation of mitotic cell cycle phase transition	21100	25248	c("GO:0007346", "GO:0044772", "GO:1901987")
query_1	FALSE	1	191	56	1	0.0178571	0.0052356	GO:1901991	GO:BP	negative regulation of mitotic cell cycle phase transition	21100	25249	c("GO:0044772", "GO:0045930", "GO:1901988", "GO:1901990")
query_1	FALSE	1	41	56	1	0.0178571	0.0243902	GO:1901998	GO:BP	toxin transport	21100	25256	GO:0006810
query_1	FALSE	1	18	56	1	0.0178571	0.0555556	GO:1902001	GO:BP	fatty acid transmembrane transport	21100	25259	c("GO:0015908", "GO:1905039")
query_1	FALSE	1	9	56	1	0.0178571	0.111111	GO:1902033	GO:BP	regulation of hematopoietic stem cell proliferation	21100	25290	c("GO:0071425", "GO:0072091")
query_1	FALSE	1	48	56	2	0.0357143	0.0416667	GO:1902041	GO:BP	regulation of extrinsic apoptotic signaling pathway via death domain receptors	21100	25298	c("GO:0008625", "GO:2001236")
query_1	FALSE	1	29	56	2	0.0357143	0.0689655	GO:1902042	GO:BP	negative regulation of extrinsic apoptotic signaling pathway via death domain receptors	21100	25299	c("GO:0008625", "GO:1902041", "GO:2001237")
query_1	FALSE	1	288	56	1	0.0178571	0.00347222	GO:1902105	GO:BP	regulation of leukocyte differentiation	21100	25355	c("GO:0002521", "GO:0045595", "GO:1903706")
query_1	FALSE	1	160	56	1	0.0178571	0.00625	GO:1902107	GO:BP	positive regulation of leukocyte differentiation	21100	25357	c("GO:0002521", "GO:0045597", "GO:1902105", "GO:1903708")
query_1	FALSE	1	48	56	2	0.0357143	0.0416667	GO:1902108	GO:BP	regulation of mitochondrial membrane permeability involved in apoptotic process	21100	25358	c("GO:0008637", "GO:0046902")
query_1	FALSE	1	42	56	2	0.0357143	0.047619	GO:1902110	GO:BP	positive regulation of mitochondrial membrane permeability involved in apoptotic process	21100	25360	c("GO:1902108", "GO:1902686")
query_1	FALSE	1	29	56	2	0.0357143	0.0689655	GO:1900745	GO:BP	positive regulation of p38MAPK cascade	21100	24076	c("GO:0032874", "GO:0038066", "GO:1900744")
query_1	FALSE	1	4213	56	18	0.321429	0.00427249	GO:1901362	GO:BP	organic cyclic compound biosynthetic process	21100	24667	c("GO:1901360", "GO:1901576")
query_1	FALSE	1	354	56	1	0.0178571	0.00282486	GO:0072507	GO:BP	divalent inorganic cation homeostasis	21100	20307	c("GO:0055080", "GO:0098771")
query_1	FALSE	1	7	56	1	0.0178571	0.142857	GO:0080144	GO:BP	amino acid homeostasis	21100	20881	GO:0048878
query_1	FALSE	1	1089	56	7	0.125	0.00642792	GO:0051726	GO:BP	regulation of cell cycle	21100	16066	c("GO:0007049", "GO:0050794")
query_1	FALSE	1	13	56	1	0.0178571	0.0769231	GO:0051775	GO:BP	response to redox state	21100	16085	GO:0050896
query_1	FALSE	1	76	56	1	0.0178571	0.0131579	GO:0051865	GO:BP	protein autoubiquitination	21100	16144	GO:0016567
query_1	FALSE	1	68	56	2	0.0357143	0.0294118	GO:0051881	GO:BP	regulation of mitochondrial membrane potential	21100	16154	GO:0042391
query_1	FALSE	1	20	56	2	0.0357143	0.1	GO:0051882	GO:BP	mitochondrial depolarization	21100	16155	c("GO:0051881", "GO:0051899")
query_1	FALSE	1	80	56	2	0.0357143	0.025	GO:0051899	GO:BP	membrane depolarization	21100	16172	GO:0042391
query_1	FALSE	1	1507	56	4	0.0714286	0.00265428	GO:0051707	GO:BP	response to other organism	21100	16056	c("GO:0043207", "GO:0044419")
query_1	FALSE	1	18	56	2	0.0357143	0.111111	GO:0051900	GO:BP	regulation of mitochondrial depolarization	21100	16173	c("GO:0003254", "GO:0051881", "GO:0051882")
query_1	FALSE	1	437	56	2	0.0357143	0.00457666	GO:0051960	GO:BP	regulation of nervous system development	21100	16221	c("GO:0007399", "GO:2000026")
query_1	FALSE	1	142	56	1	0.0178571	0.00704225	GO:0051961	GO:BP	negative regulation of nervous system development	21100	16222	c("GO:0007399", "GO:0051093", "GO:0051241", "GO:0051960")
query_1	FALSE	1	270	56	1	0.0178571	0.0037037	GO:0051962	GO:BP	positive regulation of nervous system development	21100	16223	c("GO:0007399", "GO:0051094", "GO:0051240", "GO:0051960")
query_1	FALSE	1	50	56	1	0.0178571	0.02	GO:0051972	GO:BP	regulation of telomerase activity	21100	16233	c("GO:0051338", "GO:2000278")
query_1	FALSE	1	34	56	1	0.0178571	0.0294118	GO:0051973	GO:BP	positive regulation of telomerase activity	21100	16234	c("GO:0051347", "GO:0051972", "GO:2000573")
query_1	FALSE	1	440	56	2	0.0357143	0.00454545	GO:0052547	GO:BP	regulation of peptidase activity	21100	16659	c("GO:0030162", "GO:0051336")
query_1	FALSE	1	29	56	1	0.0178571	0.0344828	GO:0051938	GO:BP	L-glutamate import	21100	16200	c("GO:0006835", "GO:0015800", "GO:0015807")
query_1	FALSE	1	1655	56	7	0.125	0.00422961	GO:0051674	GO:BP	localization of cell	21100	16030	c("GO:0009987", "GO:0051179")
query_1	FALSE	1	877	56	5	0.0892857	0.00570125	GO:0051668	GO:BP	localization within membrane	21100	16026	GO:0051641
query_1	FALSE	1	410	56	2	0.0357143	0.00487805	GO:0051656	GO:BP	establishment of organelle localization	21100	16015	c("GO:0051234", "GO:0051640")
query_1	FALSE	1	239	56	3	0.0535714	0.0125523	GO:0051403	GO:BP	stress-activated MAPK cascade	21100	15824	c("GO:0000165", "GO:0031098")
query_1	FALSE	1	39	56	1	0.0178571	0.025641	GO:0051567	GO:BP	histone H3-K9 methylation	21100	15935	c("GO:0034968", "GO:0061647")
query_1	FALSE	1	72	56	1	0.0178571	0.0138889	GO:0051568	GO:BP	histone H3-K4 methylation	21100	15936	GO:0034968
query_1	FALSE	1	38	56	1	0.0178571	0.0263158	GO:0051569	GO:BP	regulation of histone H3-K4 methylation	21100	15937	c("GO:0031060", "GO:0051568")
query_1	FALSE	1	25	56	1	0.0178571	0.04	GO:0051570	GO:BP	regulation of histone H3-K9 methylation	21100	15938	c("GO:0031060", "GO:0051567")
query_1	FALSE	1	27	56	1	0.0178571	0.037037	GO:0051571	GO:BP	positive regulation of histone H3-K4 methylation	21100	15939	c("GO:0031062", "GO:0051568", "GO:0051569")
query_1	FALSE	1	11	56	1	0.0178571	0.0909091	GO:0051574	GO:BP	positive regulation of histone H3-K9 methylation	21100	15942	c("GO:0031062", "GO:0051567", "GO:0051570")
query_1	FALSE	1	145	56	1	0.0178571	0.00689655	GO:0051592	GO:BP	response to calcium ion	21100	15955	GO:0010038
query_1	FALSE	1	778	56	7	0.125	0.00899743	GO:0051603	GO:BP	proteolysis involved in cellular protein catabolic process	21100	15966	c("GO:0006508", "GO:0044257")
query_1	FALSE	1	542	56	2	0.0357143	0.00369004	GO:0051640	GO:BP	organelle localization	21100	15999	GO:0051641
query_1	FALSE	1	3031	56	12	0.214286	0.00395909	GO:0051641	GO:BP	cellular localization	21100	16000	c("GO:0009987", "GO:0051179")
query_1	FALSE	1	190	56	1	0.0178571	0.00526316	GO:0051648	GO:BP	vesicle localization	21100	16007	GO:0051640
query_1	FALSE	1	2196	56	7	0.125	0.00318761	GO:0051649	GO:BP	establishment of localization in cell	21100	16008	c("GO:0051234", "GO:0051641")
query_1	FALSE	1	173	56	1	0.0178571	0.00578035	GO:0051650	GO:BP	establishment of vesicle localization	21100	16009	c("GO:0051648", "GO:0051649", "GO:0051656")
query_1	FALSE	1	222	56	1	0.0178571	0.0045045	GO:0051651	GO:BP	maintenance of location in cell	21100	16010	c("GO:0009987", "GO:0051235", "GO:0051641")
query_1	FALSE	1	412	56	2	0.0357143	0.00485437	GO:0052548	GO:BP	regulation of endopeptidase activity	21100	16660	GO:0052547
query_1	FALSE	1	242	56	4	0.0714286	0.0165289	GO:0051402	GO:BP	neuron apoptotic process	21100	15823	c("GO:0006915", "GO:0070997")
query_1	FALSE	1	69	56	1	0.0178571	0.0144928	GO:0055017	GO:BP	cardiac muscle tissue growth	21100	16745	c("GO:0048589", "GO:0048738", "GO:0060419")
query_1	FALSE	1	28	56	1	0.0178571	0.0357143	GO:0055023	GO:BP	positive regulation of cardiac muscle tissue growth	21100	16751	c("GO:0055017", "GO:0055021", "GO:0060421")
query_1	FALSE	1	809	56	4	0.0714286	0.00494438	GO:0060322	GO:BP	head development	21100	17097	GO:0048856
query_1	FALSE	1	50	56	1	0.0178571	0.02	GO:0060324	GO:BP	face development	21100	17099	c("GO:0048856", "GO:0060322")
query_1	FALSE	1	741	56	6	0.107143	0.00809717	GO:0060341	GO:BP	regulation of cellular localization	21100	17116	c("GO:0032879", "GO:0050794", "GO:0051641")
query_1	FALSE	1	78	56	1	0.0178571	0.0128205	GO:0060419	GO:BP	heart growth	21100	17186	c("GO:0007507", "GO:0035265")
query_1	FALSE	1	60	56	1	0.0178571	0.0166667	GO:0060420	GO:BP	regulation of heart growth	21100	17187	c("GO:0046620", "GO:0060419", "GO:2000026")
query_1	FALSE	1	32	56	1	0.0178571	0.03125	GO:0060421	GO:BP	positive regulation of heart growth	21100	17188	c("GO:0046622", "GO:0060419", "GO:0060420")
query_1	FALSE	1	104	56	1	0.0178571	0.00961538	GO:0060291	GO:BP	long-term synaptic potentiation	21100	17068	c("GO:0048167", "GO:0050806")
query_1	FALSE	1	50	56	1	0.0178571	0.02	GO:0060425	GO:BP	lung morphogenesis	21100	17191	c("GO:0009887", "GO:0030324")
query_1	FALSE	1	294	56	1	0.0178571	0.00340136	GO:0060485	GO:BP	mesenchyme development	21100	17250	c("GO:0009888", "GO:0048513")
query_1	FALSE	1	394	56	2	0.0357143	0.00507614	GO:0060537	GO:BP	muscle tissue development	21100	17302	GO:0009888
query_1	FALSE	1	205	56	2	0.0357143	0.0097561	GO:0060541	GO:BP	respiratory system development	21100	17306	GO:0048731
query_1	FALSE	1	983	56	8	0.142857	0.00813835	GO:0060548	GO:BP	negative regulation of cell death	21100	17313	c("GO:0008219", "GO:0010941", "GO:0048523")
query_1	FALSE	1	237	56	1	0.0178571	0.00421941	GO:0060560	GO:BP	developmental growth involved in morphogenesis	21100	17322	c("GO:0009653", "GO:0048589")
query_1	FALSE	1	531	56	1	0.0178571	0.00188324	GO:0060627	GO:BP	regulation of vesicle-mediated transport	21100	17385	c("GO:0016192", "GO:0050794", "GO:0051049")
query_1	FALSE	1	1180	56	2	0.0357143	0.00169492	GO:0060429	GO:BP	epithelium development	21100	17195	GO:0009888
query_1	FALSE	1	497	56	2	0.0357143	0.00402414	GO:0060284	GO:BP	regulation of cell development	21100	17061	c("GO:0045595", "GO:0048468")
query_1	FALSE	1	6787	56	26	0.464286	0.00383085	GO:0060255	GO:BP	regulation of macromolecule metabolic process	21100	17032	c("GO:0019222", "GO:0043170")
query_1	FALSE	1	178	56	1	0.0178571	0.00561798	GO:0060173	GO:BP	limb development	21100	16969	GO:0048736
query_1	FALSE	1	14	56	1	0.0178571	0.0714286	GO:0055057	GO:BP	neuroblast division	21100	16762	c("GO:0007405", "GO:0051301")
query_1	FALSE	1	511	56	2	0.0357143	0.00391389	GO:0055065	GO:BP	metal ion homeostasis	21100	16770	c("GO:0055080", "GO:0098771")
query_1	FALSE	1	153	56	1	0.0178571	0.00653595	GO:0055067	GO:BP	monovalent inorganic cation homeostasis	21100	16772	c("GO:0055080", "GO:0098771")
query_1	FALSE	1	83	56	1	0.0178571	0.0120482	GO:0055072	GO:BP	iron ion homeostasis	21100	16777	GO:0055076
query_1	FALSE	1	309	56	1	0.0178571	0.00323625	GO:0055074	GO:BP	calcium ion homeostasis	21100	16779	c("GO:0055065", "GO:0072507")
query_1	FALSE	1	136	56	1	0.0178571	0.00735294	GO:0055076	GO:BP	transition metal ion homeostasis	21100	16781	GO:0055065
query_1	FALSE	1	587	56	3	0.0535714	0.00511073	GO:0055080	GO:BP	cation homeostasis	21100	16784	GO:0050801
query_1	FALSE	1	43	56	1	0.0178571	0.0232558	GO:0055081	GO:BP	anion homeostasis	21100	16785	GO:0050801
query_1	FALSE	1	658	56	7	0.125	0.0106383	GO:0055082	GO:BP	cellular chemical homeostasis	21100	16786	c("GO:0019725", "GO:0048878")
query_1	FALSE	1	1528	56	6	0.107143	0.0039267	GO:0055085	GO:BP	transmembrane transport	21100	16788	c("GO:0006810", "GO:0009987")
query_1	FALSE	1	159	56	2	0.0357143	0.0125786	GO:0055088	GO:BP	lipid homeostasis	21100	16790	GO:0048878
query_1	FALSE	1	47	56	1	0.0178571	0.0212766	GO:0060038	GO:BP	cardiac muscle cell proliferation	21100	16855	c("GO:0014855", "GO:0055017")
query_1	FALSE	1	38	56	1	0.0178571	0.0263158	GO:0060043	GO:BP	regulation of cardiac muscle cell proliferation	21100	16860	c("GO:0042127", "GO:0055021", "GO:0060038")
query_1	FALSE	1	23	56	1	0.0178571	0.0434783	GO:0060045	GO:BP	positive regulation of cardiac muscle cell proliferation	21100	16862	c("GO:0008284", "GO:0055023", "GO:0060038", "GO:0060043")
query_1	FALSE	1	325	56	3	0.0535714	0.00923077	GO:0060070	GO:BP	canonical Wnt signaling pathway	21100	16886	GO:0016055
query_1	FALSE	1	53	56	1	0.0178571	0.0188679	GO:0055021	GO:BP	regulation of cardiac muscle tissue growth	21100	16749	c("GO:0055017", "GO:0060420")
query_1	FALSE	1	161	56	1	0.0178571	0.00621118	GO:0060759	GO:BP	regulation of response to cytokine stimulus	21100	17513	c("GO:0034097", "GO:0048583")
query_1	FALSE	1	10	56	1	0.0178571	0.1	GO:0051351	GO:BP	positive regulation of ligase activity	21100	15791	c("GO:0043085", "GO:0051340")
query_1	FALSE	1	575	56	1	0.0178571	0.00173913	GO:0051347	GO:BP	positive regulation of transferase activity	21100	15787	c("GO:0043085", "GO:0051338")
query_1	FALSE	1	1268	56	5	0.0892857	0.00394322	GO:0051094	GO:BP	positive regulation of developmental process	21100	15571	c("GO:0032502", "GO:0048518", "GO:0050793")
query_1	FALSE	1	366	56	2	0.0357143	0.00546448	GO:0051098	GO:BP	regulation of binding	21100	15575	GO:0065009
query_1	FALSE	1	161	56	2	0.0357143	0.0124224	GO:0051100	GO:BP	negative regulation of binding	21100	15577	c("GO:0044092", "GO:0051098")
query_1	FALSE	1	121	56	2	0.0357143	0.0165289	GO:0051101	GO:BP	regulation of DNA binding	21100	15578	GO:0051098
query_1	FALSE	1	2276	56	8	0.142857	0.00351494	GO:0051128	GO:BP	regulation of cellular component organization	21100	15598	c("GO:0016043", "GO:0050794")
query_1	FALSE	1	678	56	3	0.0535714	0.00442478	GO:0051129	GO:BP	negative regulation of cellular component organization	21100	15599	c("GO:0016043", "GO:0048523", "GO:0051128")
query_1	FALSE	1	877	56	4	0.0714286	0.004561	GO:0051093	GO:BP	negative regulation of developmental process	21100	15570	c("GO:0032502", "GO:0048519", "GO:0050793")
query_1	FALSE	1	1046	56	3	0.0535714	0.00286807	GO:0051130	GO:BP	positive regulation of cellular component organization	21100	15600	c("GO:0016043", "GO:0048522", "GO:0051128")
query_1	FALSE	1	313	56	2	0.0357143	0.00638978	GO:0051169	GO:BP	nuclear transport	21100	15638	GO:0046907
query_1	FALSE	1	167	56	1	0.0178571	0.00598802	GO:0051170	GO:BP	import into nucleus	21100	15639	GO:0006913
query_1	FALSE	1	5654	56	22	0.392857	0.00389105	GO:0051171	GO:BP	regulation of nitrogen compound metabolic process	21100	15640	c("GO:0006807", "GO:0019222")
query_1	FALSE	1	2371	56	9	0.160714	0.00379587	GO:0051172	GO:BP	negative regulation of nitrogen compound metabolic process	21100	15641	c("GO:0006807", "GO:0009892", "GO:0051171")
query_1	FALSE	1	3083	56	11	0.196429	0.00356795	GO:0051173	GO:BP	positive regulation of nitrogen compound metabolic process	21100	15642	c("GO:0006807", "GO:0009893", "GO:0051171")
query_1	FALSE	1	1388	56	3	0.0535714	0.00216138	GO:0051174	GO:BP	regulation of phosphorus metabolic process	21100	15643	c("GO:0006793", "GO:0031323")
query_1	FALSE	1	155	56	1	0.0178571	0.00645161	GO:0051168	GO:BP	nuclear export	21100	15637	GO:0006913
query_1	FALSE	1	266	56	1	0.0178571	0.0037594	GO:0051091	GO:BP	positive regulation of DNA-binding transcription factor activity	21100	15568	c("GO:0044093", "GO:0051090")
query_1	FALSE	1	435	56	3	0.0535714	0.00689655	GO:0051090	GO:BP	regulation of DNA-binding transcription factor activity	21100	15567	c("GO:0006355", "GO:0065009")
query_1	FALSE	1	307	56	1	0.0178571	0.00325733	GO:0051056	GO:BP	regulation of small GTPase mediated signal transduction	21100	15547	c("GO:0007264", "GO:1902531")
query_1	FALSE	1	392	56	1	0.0178571	0.00255102	GO:0050878	GO:BP	regulation of body fluid levels	21100	15394	GO:0065008
query_1	FALSE	1	305	56	2	0.0357143	0.00655738	GO:0050890	GO:BP	cognition	21100	15405	GO:0050877
query_1	FALSE	1	384	56	1	0.0178571	0.00260417	GO:0050900	GO:BP	leukocyte migration	21100	15413	c("GO:0002376", "GO:0016477")
query_1	FALSE	1	61	56	1	0.0178571	0.0163934	GO:0050994	GO:BP	regulation of lipid catabolic process	21100	15507	c("GO:0009894", "GO:0016042", "GO:0019216")
query_1	FALSE	1	28	56	1	0.0178571	0.0357143	GO:0050996	GO:BP	positive regulation of lipid catabolic process	21100	15509	c("GO:0009896", "GO:0016042", "GO:0045834", "GO:0050994")
query_1	FALSE	1	130	56	1	0.0178571	0.00769231	GO:0051028	GO:BP	mRNA transport	21100	15523	GO:0050658
query_1	FALSE	1	603	56	2	0.0357143	0.00331675	GO:0051046	GO:BP	regulation of secretion	21100	15537	c("GO:0046903", "GO:0051049")
query_1	FALSE	1	303	56	1	0.0178571	0.00330033	GO:0051047	GO:BP	positive regulation of secretion	21100	15538	c("GO:0046903", "GO:0051046", "GO:0051050")
query_1	FALSE	1	160	56	1	0.0178571	0.00625	GO:0051048	GO:BP	negative regulation of secretion	21100	15539	c("GO:0046903", "GO:0051046", "GO:0051051")
query_1	FALSE	1	1724	56	8	0.142857	0.00464037	GO:0051049	GO:BP	regulation of transport	21100	15540	c("GO:0006810", "GO:0032879")
query_1	FALSE	1	896	56	2	0.0357143	0.00223214	GO:0051050	GO:BP	positive regulation of transport	21100	15541	c("GO:0006810", "GO:0048518", "GO:0051049")
query_1	FALSE	1	420	56	2	0.0357143	0.0047619	GO:0051051	GO:BP	negative regulation of transport	21100	15542	c("GO:0006810", "GO:0048519", "GO:0051049")
query_1	FALSE	1	470	56	1	0.0178571	0.00212766	GO:0051052	GO:BP	regulation of DNA metabolic process	21100	15543	c("GO:0006259", "GO:0019219", "GO:0060255")
query_1	FALSE	1	147	56	1	0.0178571	0.00680272	GO:0051053	GO:BP	negative regulation of DNA metabolic process	21100	15544	c("GO:0006259", "GO:0010605", "GO:0045934", "GO:0051052")
query_1	FALSE	1	273	56	1	0.0178571	0.003663	GO:0051054	GO:BP	positive regulation of DNA metabolic process	21100	15545	c("GO:0006259", "GO:0010604", "GO:0045935", "GO:0051052")
query_1	FALSE	1	6436	56	23	0.410714	0.00357365	GO:0051179	GO:BP	localization	21100	15648	GO:0008150
query_1	FALSE	1	265	56	2	0.0357143	0.00754717	GO:0051348	GO:BP	negative regulation of transferase activity	21100	15788	c("GO:0043086", "GO:0051338")
query_1	FALSE	1	31	56	1	0.0178571	0.0322581	GO:0051204	GO:BP	protein insertion into mitochondrial membrane	21100	15669	c("GO:0006839", "GO:0006886", "GO:0051205", "GO:0070585", "GO:0090151")
query_1	FALSE	1	131	56	1	0.0178571	0.00763359	GO:0051208	GO:BP	sequestering of calcium ion	21100	15672	c("GO:0006874", "GO:0051651")
query_1	FALSE	1	193	56	1	0.0178571	0.00518135	GO:0051260	GO:BP	protein homooligomerization	21100	15715	GO:0051259
query_1	FALSE	1	1028	56	5	0.0892857	0.00486381	GO:0051270	GO:BP	regulation of cellular component movement	21100	15719	c("GO:0006928", "GO:0032879", "GO:0050794")
query_1	FALSE	1	289	56	2	0.0357143	0.00692042	GO:0051271	GO:BP	negative regulation of cellular component movement	21100	15720	c("GO:0006928", "GO:0048523", "GO:0051270")
query_1	FALSE	1	561	56	2	0.0357143	0.00356506	GO:0051272	GO:BP	positive regulation of cellular component movement	21100	15721	c("GO:0006928", "GO:0048522", "GO:0051270")
query_1	FALSE	1	1059	56	3	0.0535714	0.00283286	GO:0051276	GO:BP	chromosome organization	21100	15725	GO:0006996
query_1	FALSE	1	127	56	1	0.0178571	0.00787402	GO:0051282	GO:BP	regulation of sequestering of calcium ion	21100	15730	c("GO:0032879", "GO:0050794", "GO:0051208")
query_1	FALSE	1	253	56	1	0.0178571	0.00395257	GO:0051259	GO:BP	protein complex oligomerization	21100	15714	GO:0065003
query_1	FALSE	1	125	56	1	0.0178571	0.008	GO:0051283	GO:BP	negative regulation of sequestering of calcium ion	21100	15731	c("GO:0048523", "GO:0051208", "GO:0051282")
query_1	FALSE	1	267	56	2	0.0357143	0.00749064	GO:0051321	GO:BP	meiotic cell cycle	21100	15761	c("GO:0007049", "GO:0022414")
query_1	FALSE	1	992	56	2	0.0357143	0.00201613	GO:0051336	GO:BP	regulation of hydrolase activity	21100	15776	GO:0050790
query_1	FALSE	1	893	56	3	0.0535714	0.00335946	GO:0051338	GO:BP	regulation of transferase activity	21100	15778	GO:0050790
query_1	FALSE	1	12	56	1	0.0178571	0.0833333	GO:0051340	GO:BP	regulation of ligase activity	21100	15780	GO:0050790
query_1	FALSE	1	573	56	1	0.0178571	0.0017452	GO:0051345	GO:BP	positive regulation of hydrolase activity	21100	15785	c("GO:0043085", "GO:0051336")
query_1	FALSE	1	353	56	1	0.0178571	0.00283286	GO:0051346	GO:BP	negative regulation of hydrolase activity	21100	15786	c("GO:0043086", "GO:0051336")
query_1	FALSE	1	646	56	2	0.0357143	0.00309598	GO:0051301	GO:BP	cell division	21100	15744	GO:0009987
query_1	FALSE	1	1769	56	9	0.160714	0.00508762	GO:0051254	GO:BP	positive regulation of RNA metabolic process	21100	15709	c("GO:0010604", "GO:0016070", "GO:0045935", "GO:0051252")
query_1	FALSE	1	1409	56	5	0.0892857	0.00354862	GO:0051253	GO:BP	negative regulation of RNA metabolic process	21100	15708	c("GO:0010605", "GO:0016070", "GO:0045934", "GO:0051252")
query_1	FALSE	1	3753	56	16	0.285714	0.00426326	GO:0051252	GO:BP	regulation of RNA metabolic process	21100	15707	c("GO:0016070", "GO:0019219", "GO:0060255")
query_1	FALSE	1	124	56	1	0.0178571	0.00806452	GO:0051209	GO:BP	release of sequestered calcium ion into cytosol	21100	15673	c("GO:0051283", "GO:0097553")
query_1	FALSE	1	300	56	2	0.0357143	0.00666667	GO:0051222	GO:BP	positive regulation of protein transport	21100	15683	c("GO:0015031", "GO:0051050", "GO:0051223", "GO:1904951")
query_1	FALSE	1	498	56	4	0.0714286	0.00803213	GO:0051223	GO:BP	regulation of protein transport	21100	15684	c("GO:0015031", "GO:0051049", "GO:0070201")
query_1	FALSE	1	122	56	1	0.0178571	0.00819672	GO:0051225	GO:BP	spindle assembly	21100	15686	c("GO:0007051", "GO:0140694")
query_1	FALSE	1	4903	56	17	0.303571	0.00346726	GO:0051234	GO:BP	establishment of localization	21100	15692	GO:0051179
query_1	FALSE	1	333	56	1	0.0178571	0.003003	GO:0051235	GO:BP	maintenance of location	21100	15693	GO:0051179
query_1	FALSE	1	166	56	1	0.0178571	0.0060241	GO:0051236	GO:BP	establishment of RNA localization	21100	15694	c("GO:0006403", "GO:0051234")
query_1	FALSE	1	2666	56	9	0.160714	0.00337584	GO:0051239	GO:BP	regulation of multicellular organismal process	21100	15697	c("GO:0032501", "GO:0050789")
query_1	FALSE	1	1434	56	5	0.0892857	0.00348675	GO:0051240	GO:BP	positive regulation of multicellular organismal process	21100	15698	c("GO:0032501", "GO:0048518", "GO:0051239")
query_1	FALSE	1	1000	56	3	0.0535714	0.003	GO:0051241	GO:BP	negative regulation of multicellular organismal process	21100	15699	c("GO:0032501", "GO:0048519", "GO:0051239")
query_1	FALSE	1	2536	56	9	0.160714	0.0035489	GO:0051246	GO:BP	regulation of protein metabolic process	21100	15701	c("GO:0019538", "GO:0051171", "GO:0060255", "GO:0080090")
query_1	FALSE	1	1493	56	5	0.0892857	0.00334896	GO:0051247	GO:BP	positive regulation of protein metabolic process	21100	15702	c("GO:0010604", "GO:0019538", "GO:0051173", "GO:0051246")
query_1	FALSE	1	1034	56	5	0.0892857	0.00483559	GO:0051248	GO:BP	negative regulation of protein metabolic process	21100	15703	c("GO:0010605", "GO:0019538", "GO:0051172", "GO:0051246")
query_1	FALSE	1	529	56	2	0.0357143	0.00378072	GO:0051249	GO:BP	regulation of lymphocyte activation	21100	15704	c("GO:0002694", "GO:0046649")
query_1	FALSE	1	368	56	2	0.0357143	0.00543478	GO:0051251	GO:BP	positive regulation of lymphocyte activation	21100	15706	c("GO:0002696", "GO:0046649", "GO:0051249")
query_1	FALSE	1	67	56	2	0.0357143	0.0298507	GO:0051205	GO:BP	protein insertion into membrane	21100	15670	c("GO:0034613", "GO:0061024", "GO:0090150")
query_1	FALSE	1	45	56	1	0.0178571	0.0222222	GO:0089718	GO:BP	amino acid import across plasma membrane	21100	21031	c("GO:0003333", "GO:0098657", "GO:0098739")
query_1	FALSE	1	77	56	1	0.0178571	0.012987	GO:0060761	GO:BP	negative regulation of response to cytokine stimulus	21100	17515	c("GO:0034097", "GO:0048585", "GO:0060759")
query_1	FALSE	1	32	56	1	0.0178571	0.03125	GO:0060914	GO:BP	heart formation	21100	17666	c("GO:0003007", "GO:0048645")
query_1	FALSE	1	206	56	1	0.0178571	0.00485437	GO:0071383	GO:BP	cellular response to steroid hormone stimulus	21100	19412	c("GO:0032870", "GO:0048545", "GO:0071396", "GO:0071407")
query_1	FALSE	1	17	56	1	0.0178571	0.0588235	GO:0071391	GO:BP	cellular response to estrogen stimulus	21100	19420	c("GO:0032870", "GO:0043627")
query_1	FALSE	1	573	56	2	0.0357143	0.0034904	GO:0071396	GO:BP	cellular response to lipid	21100	19425	c("GO:0033993", "GO:0071310")
query_1	FALSE	1	569	56	4	0.0714286	0.00702988	GO:0071407	GO:BP	cellular response to organic cyclic compound	21100	19436	c("GO:0014070", "GO:0071310")
query_1	FALSE	1	626	56	3	0.0535714	0.00479233	GO:0071417	GO:BP	cellular response to organonitrogen compound	21100	19446	c("GO:0010243", "GO:0071310", "GO:0071495", "GO:1901699")
query_1	FALSE	1	25	56	1	0.0178571	0.04	GO:0071425	GO:BP	hematopoietic stem cell proliferation	21100	19453	c("GO:0030097", "GO:0072089")
query_1	FALSE	1	288	56	2	0.0357143	0.00694444	GO:0071375	GO:BP	cellular response to peptide hormone stimulus	21100	19404	c("GO:0032870", "GO:0043434", "GO:1901653")
query_1	FALSE	1	6	56	1	0.0178571	0.166667	GO:0071440	GO:BP	regulation of histone H3-K14 acetylation	21100	19463	c("GO:0035065", "GO:0044154")
query_1	FALSE	1	8	56	1	0.0178571	0.125	GO:0071447	GO:BP	cellular response to hydroperoxide	21100	19469	c("GO:0033194", "GO:0034599", "GO:1901701")
query_1	FALSE	1	181	56	2	0.0357143	0.0110497	GO:0071453	GO:BP	cellular response to oxygen levels	21100	19475	c("GO:0070482", "GO:0070887")
query_1	FALSE	1	157	56	2	0.0357143	0.0127389	GO:0071456	GO:BP	cellular response to hypoxia	21100	19478	c("GO:0001666", "GO:0033554", "GO:0036294")
query_1	FALSE	1	188	56	2	0.0357143	0.0106383	GO:0071478	GO:BP	cellular response to radiation	21100	19499	c("GO:0009314", "GO:0071214")
query_1	FALSE	1	75	56	1	0.0178571	0.0133333	GO:0071479	GO:BP	cellular response to ionizing radiation	21100	19500	c("GO:0010212", "GO:0071478")
query_1	FALSE	1	122	56	1	0.0178571	0.00819672	GO:0071482	GO:BP	cellular response to light stimulus	21100	19503	c("GO:0009416", "GO:0071478")
query_1	FALSE	1	4	56	1	0.0178571	0.25	GO:0071442	GO:BP	positive regulation of histone H3-K14 acetylation	21100	19465	c("GO:0035066", "GO:0044154", "GO:0071440")
query_1	FALSE	1	20	56	2	0.0357143	0.1	GO:0071371	GO:BP	cellular response to gonadotropin stimulus	21100	19400	c("GO:0032870", "GO:0034698")
query_1	FALSE	1	655	56	2	0.0357143	0.00305344	GO:0071363	GO:BP	cellular response to growth factor stimulus	21100	19392	c("GO:0070848", "GO:0071310")
query_1	FALSE	1	13	56	1	0.0178571	0.0769231	GO:0071361	GO:BP	cellular response to ethanol	21100	19390	c("GO:0045471", "GO:0097306")
query_1	FALSE	1	87	56	2	0.0357143	0.0229885	GO:0071229	GO:BP	cellular response to acid chemical	21100	19264	c("GO:0001101", "GO:0070887")
query_1	FALSE	1	79	56	2	0.0357143	0.0253165	GO:0071230	GO:BP	cellular response to amino acid stimulus	21100	19265	c("GO:0043200", "GO:0071229", "GO:0071417", "GO:1901701")
query_1	FALSE	1	221	56	2	0.0357143	0.00904977	GO:0071241	GO:BP	cellular response to inorganic substance	21100	19276	c("GO:0010035", "GO:0070887")
query_1	FALSE	1	20	56	1	0.0178571	0.05	GO:0071243	GO:BP	cellular response to arsenic-containing substance	21100	19278	c("GO:0046685", "GO:0070887")
query_1	FALSE	1	191	56	2	0.0357143	0.0104712	GO:0071248	GO:BP	cellular response to metal ion	21100	19283	c("GO:0010038", "GO:0071241")
query_1	FALSE	1	73	56	1	0.0178571	0.0136986	GO:0071260	GO:BP	cellular response to mechanical stimulus	21100	19292	c("GO:0009612", "GO:0071214", "GO:0071496")
query_1	FALSE	1	36	56	1	0.0178571	0.0277778	GO:0071276	GO:BP	cellular response to cadmium ion	21100	19307	c("GO:0046686", "GO:0071248")
query_1	FALSE	1	85	56	1	0.0178571	0.0117647	GO:0071277	GO:BP	cellular response to calcium ion	21100	19308	c("GO:0051592", "GO:0071248")
query_1	FALSE	1	9	56	1	0.0178571	0.111111	GO:0071281	GO:BP	cellular response to iron ion	21100	19312	c("GO:0010039", "GO:0071248")
query_1	FALSE	1	31	56	1	0.0178571	0.0322581	GO:0071295	GO:BP	cellular response to vitamin	21100	19326	c("GO:0031670", "GO:0033273")
query_1	FALSE	1	21	56	1	0.0178571	0.047619	GO:0071305	GO:BP	cellular response to vitamin D	21100	19336	c("GO:0033280", "GO:0071295", "GO:0071396", "GO:0071407", "GO:1901701")
query_1	FALSE	1	2391	56	10	0.178571	0.00418235	GO:0071310	GO:BP	cellular response to organic substance	21100	19341	c("GO:0010033", "GO:0070887")
query_1	FALSE	1	143	56	4	0.0714286	0.027972	GO:0071322	GO:BP	cellular response to carbohydrate stimulus	21100	19353	c("GO:0009743", "GO:0071310", "GO:1901701")
query_1	FALSE	1	831	56	3	0.0535714	0.00361011	GO:0071345	GO:BP	cellular response to cytokine stimulus	21100	19374	c("GO:0034097", "GO:0071310")
query_1	FALSE	1	242	56	1	0.0178571	0.00413223	GO:0071356	GO:BP	cellular response to tumor necrosis factor	21100	19385	c("GO:0034612", "GO:0071345")
query_1	FALSE	1	1316	56	4	0.0714286	0.00303951	GO:0071495	GO:BP	cellular response to endogenous stimulus	21100	19516	GO:0009719
query_1	FALSE	1	328	56	3	0.0535714	0.00914634	GO:0071214	GO:BP	cellular response to abiotic stimulus	21100	19249	c("GO:0009628", "GO:0104004")
query_1	FALSE	1	317	56	5	0.0892857	0.0157729	GO:0071496	GO:BP	cellular response to external stimulus	21100	19517	GO:0009605
query_1	FALSE	1	2654	56	9	0.160714	0.00339111	GO:0071702	GO:BP	organic substance transport	21100	19681	GO:0006810
query_1	FALSE	1	13	56	2	0.0357143	0.153846	GO:0072537	GO:BP	fibroblast activation	21100	20325	GO:0001775
query_1	FALSE	1	16	56	1	0.0178571	0.0625	GO:0072578	GO:BP	neurotransmitter-gated ion channel clustering	21100	20341	c("GO:0043113", "GO:0050808")
query_1	FALSE	1	657	56	3	0.0535714	0.00456621	GO:0072594	GO:BP	establishment of protein localization to organelle	21100	20349	c("GO:0033365", "GO:0045184")
query_1	FALSE	1	125	56	1	0.0178571	0.008	GO:0072655	GO:BP	establishment of protein localization to mitochondrion	21100	20367	c("GO:0070585", "GO:0072594")
query_1	FALSE	1	799	56	5	0.0892857	0.00625782	GO:0072657	GO:BP	protein localization to membrane	21100	20369	c("GO:0034613", "GO:0051668")
query_1	FALSE	1	284	56	1	0.0178571	0.00352113	GO:0072659	GO:BP	protein localization to plasma membrane	21100	20371	c("GO:0072657", "GO:1990778")
query_1	FALSE	1	1	56	1	0.0178571	1	GO:1905062	GO:BP	positive regulation of cardioblast proliferation	21100	27977	c("GO:0003263", "GO:0003264", "GO:2000138")
query_1	FALSE	1	54	56	1	0.0178571	0.0185185	GO:0072698	GO:BP	protein localization to microtubule cytoskeleton	21100	20404	GO:0044380
query_1	FALSE	1	1	56	1	0.0178571	1	GO:0072703	GO:BP	cellular response to methyl methanesulfonate	21100	20409	c("GO:0071310", "GO:0072702", "GO:1901701")
query_1	FALSE	1	5	56	1	0.0178571	0.2	GO:0072718	GO:BP	response to cisplatin	21100	20424	GO:0042221
query_1	FALSE	1	4	56	1	0.0178571	0.25	GO:0072719	GO:BP	cellular response to cisplatin	21100	20425	c("GO:0070887", "GO:0072718")
query_1	FALSE	1	5812	56	23	0.410714	0.00395733	GO:0080090	GO:BP	regulation of primary metabolic process	21100	20855	c("GO:0019222", "GO:0044238")
query_1	FALSE	1	1312	56	5	0.0892857	0.00381098	GO:0080134	GO:BP	regulation of response to stress	21100	20874	c("GO:0006950", "GO:0048583")
query_1	FALSE	1	657	56	5	0.0892857	0.00761035	GO:0080135	GO:BP	regulation of cellular response to stress	21100	20875	c("GO:0033554", "GO:0050794", "GO:0080134")
query_1	FALSE	1	1	56	1	0.0178571	1	GO:0072702	GO:BP	response to methyl methanesulfonate	21100	20408	c("GO:0010033", "GO:1901700")
query_1	FALSE	1	324	56	1	0.0178571	0.00308642	GO:0072503	GO:BP	cellular divalent inorganic cation homeostasis	21100	20303	c("GO:0030003", "GO:0072507")
query_1	FALSE	1	1099	56	3	0.0535714	0.00272975	GO:0072359	GO:BP	circulatory system development	21100	20215	GO:0048731
query_1	FALSE	1	54	56	1	0.0178571	0.0185185	GO:0072348	GO:BP	sulfur compound transport	21100	20208	GO:0006810
query_1	FALSE	1	13889	56	40	0.714286	0.00287998	GO:0071704	GO:BP	organic substance metabolic process	21100	19683	GO:0008152
query_1	FALSE	1	2233	56	9	0.160714	0.00403045	GO:0071705	GO:BP	nitrogen compound transport	21100	19684	GO:0006810
query_1	FALSE	1	110	56	2	0.0357143	0.0181818	GO:0071774	GO:BP	response to fibroblast growth factor	21100	19720	c("GO:0009719", "GO:0070848")
query_1	FALSE	1	216	56	1	0.0178571	0.00462963	GO:0071805	GO:BP	potassium ion transmembrane transport	21100	19735	c("GO:0006813", "GO:0098662")
query_1	FALSE	1	18	56	1	0.0178571	0.0555556	GO:0071816	GO:BP	tail-anchored membrane protein insertion into ER membrane	21100	19742	GO:0045048
query_1	FALSE	1	8070	56	20	0.357143	0.00247831	GO:0071840	GO:BP	cellular component organization or biogenesis	21100	19757	GO:0009987
query_1	FALSE	1	111	56	3	0.0535714	0.027027	GO:0071887	GO:BP	leukocyte apoptotic process	21100	19787	GO:0006915
query_1	FALSE	1	197	56	1	0.0178571	0.00507614	GO:0071897	GO:BP	DNA biosynthetic process	21100	19795	c("GO:0006259", "GO:0009059", "GO:0034654")
query_1	FALSE	1	38	56	1	0.0178571	0.0263158	GO:0071985	GO:BP	multivesicular body sorting pathway	21100	19861	GO:0016192
query_1	FALSE	1	73	56	1	0.0178571	0.0136986	GO:0072089	GO:BP	stem cell proliferation	21100	19957	GO:0008283
query_1	FALSE	1	47	56	1	0.0178571	0.0212766	GO:0072091	GO:BP	regulation of stem cell proliferation	21100	19959	c("GO:0042127", "GO:0072089")
query_1	FALSE	1	124	56	1	0.0178571	0.00806452	GO:0072329	GO:BP	monocarboxylic acid catabolic process	21100	20192	c("GO:0032787", "GO:0046395")
query_1	FALSE	1	175	56	3	0.0535714	0.0171429	GO:0072331	GO:BP	signal transduction by p53 class mediator	21100	20194	GO:0035556
query_1	FALSE	1	81	56	2	0.0357143	0.0246914	GO:0072332	GO:BP	intrinsic apoptotic signaling pathway by p53 class mediator	21100	20195	c("GO:0072331", "GO:0097193")
query_1	FALSE	1	32	56	1	0.0178571	0.03125	GO:0072337	GO:BP	modified amino acid transport	21100	20200	c("GO:0071702", "GO:0071705")
query_1	FALSE	1	347	56	2	0.0357143	0.00576369	GO:0071692	GO:BP	protein localization to extracellular region	21100	19671	GO:0008104
query_1	FALSE	1	271	56	3	0.0535714	0.0110701	GO:0060828	GO:BP	regulation of canonical Wnt signaling pathway	21100	17582	c("GO:0030111", "GO:0060070")
query_1	FALSE	1	9	56	1	0.0178571	0.111111	GO:0071169	GO:BP	establishment of protein localization to chromatin	21100	19239	c("GO:0070199", "GO:0071168")
query_1	FALSE	1	37	56	1	0.0178571	0.027027	GO:0071108	GO:BP	protein K48-linked deubiquitination	21100	19229	GO:0016579
query_1	FALSE	1	45	56	1	0.0178571	0.0222222	GO:0062208	GO:BP	positive regulation of pattern recognition receptor signaling pathway	21100	18586	c("GO:0002221", "GO:0009967", "GO:0062207")
query_1	FALSE	1	3197	56	2	0.0357143	0.000625586	GO:0065003	GO:BP	protein-containing complex assembly	21100	18609	c("GO:0022607", "GO:0043933")
query_1	FALSE	1	13001	56	46	0.821429	0.00353819	GO:0065007	GO:BP	biological regulation	21100	18612	GO:0008150
query_1	FALSE	1	3768	56	17	0.303571	0.00451168	GO:0065008	GO:BP	regulation of biological quality	21100	18613	GO:0065007
query_1	FALSE	1	3050	56	10	0.178571	0.00327869	GO:0065009	GO:BP	regulation of molecular function	21100	18614	GO:0065007
query_1	FALSE	1	64	56	1	0.0178571	0.015625	GO:0070059	GO:BP	intrinsic apoptotic signaling pathway in response to endoplasmic reticulum stress	21100	18620	c("GO:0034976", "GO:0097193")
query_1	FALSE	1	102	56	1	0.0178571	0.00980392	GO:0062207	GO:BP	regulation of pattern recognition receptor signaling pathway	21100	18585	c("GO:0002221", "GO:0009966", "GO:0050776")
query_1	FALSE	1	1	56	1	0.0178571	1	GO:0070060	GO:BP	'de novo' actin filament nucleation	21100	18621	GO:0045010
query_1	FALSE	1	31	56	1	0.0178571	0.0322581	GO:0070198	GO:BP	protein localization to chromosome, telomeric region	21100	18710	GO:0034502
query_1	FALSE	1	27	56	1	0.0178571	0.037037	GO:0070199	GO:BP	establishment of protein localization to chromosome	21100	18711	c("GO:0034502", "GO:0072594")
query_1	FALSE	1	523	56	4	0.0714286	0.00764818	GO:0070201	GO:BP	regulation of establishment of protein localization	21100	18713	c("GO:0032880", "GO:0045184")
query_1	FALSE	1	8	56	1	0.0178571	0.125	GO:0070212	GO:BP	protein poly-ADP-ribosylation	21100	18719	GO:0006471
query_1	FALSE	1	12	56	1	0.0178571	0.0833333	GO:0070213	GO:BP	protein auto-ADP-ribosylation	21100	18720	GO:0006471
query_1	FALSE	1	76	56	2	0.0357143	0.0263158	GO:0070227	GO:BP	lymphocyte apoptotic process	21100	18728	GO:0071887
query_1	FALSE	1	99	56	1	0.0178571	0.010101	GO:0070167	GO:BP	regulation of biomineral tissue development	21100	18689	c("GO:0031214", "GO:0110149", "GO:2000026")
query_1	FALSE	1	139	56	1	0.0178571	0.00719424	GO:0062013	GO:BP	positive regulation of small molecule metabolic process	21100	18503	c("GO:0009893", "GO:0044281", "GO:0062012")
query_1	FALSE	1	347	56	2	0.0357143	0.00576369	GO:0062012	GO:BP	regulation of small molecule metabolic process	21100	18502	c("GO:0019222", "GO:0044281")
query_1	FALSE	1	134	56	1	0.0178571	0.00746269	GO:0061982	GO:BP	meiosis I cell cycle process	21100	18486	GO:1903046
query_1	FALSE	1	137	56	1	0.0178571	0.00729927	GO:0061008	GO:BP	hepaticobiliary system development	21100	17758	GO:0048731
query_1	FALSE	1	829	56	5	0.0892857	0.00603136	GO:0061024	GO:BP	membrane organization	21100	17767	GO:0016043
query_1	FALSE	1	28	56	1	0.0178571	0.0357143	GO:0061082	GO:BP	myeloid leukocyte cytokine production	21100	17824	GO:0002367
query_1	FALSE	1	195	56	2	0.0357143	0.0102564	GO:0061136	GO:BP	regulation of proteasomal protein catabolic process	21100	17875	c("GO:0010498", "GO:1903050")
query_1	FALSE	1	19	56	1	0.0178571	0.0526316	GO:0061323	GO:BP	cell proliferation involved in heart morphogenesis	21100	18051	c("GO:0003007", "GO:0008283")
query_1	FALSE	1	147	56	1	0.0178571	0.00680272	GO:0061351	GO:BP	neural precursor cell proliferation	21100	18079	GO:0008283
query_1	FALSE	1	111	56	1	0.0178571	0.00900901	GO:0061387	GO:BP	regulation of extent of cell growth	21100	18115	c("GO:0001558", "GO:0008361")
query_1	FALSE	1	439	56	1	0.0178571	0.0022779	GO:0061458	GO:BP	reproductive system development	21100	18185	GO:0048731
query_1	FALSE	1	484	56	2	0.0357143	0.00413223	GO:0061564	GO:BP	axon development	21100	18256	GO:0031175
query_1	FALSE	1	11	56	1	0.0178571	0.0909091	GO:0061635	GO:BP	regulation of protein complex stability	21100	18297	GO:0065008
query_1	FALSE	1	52	56	1	0.0178571	0.0192308	GO:0061647	GO:BP	histone H3-K9 modification	21100	18305	GO:0016570
query_1	FALSE	1	14	56	1	0.0178571	0.0714286	GO:0061709	GO:BP	reticulophagy	21100	18328	c("GO:0061912", "GO:1903008")
query_1	FALSE	1	88	56	2	0.0357143	0.0227273	GO:0061726	GO:BP	mitochondrion disassembly	21100	18340	c("GO:0007005", "GO:1903008")
query_1	FALSE	1	78	56	2	0.0357143	0.025641	GO:0061912	GO:BP	selective autophagy	21100	18435	GO:0016236
query_1	FALSE	1	541	56	5	0.0892857	0.00924214	GO:0061919	GO:BP	process utilizing autophagic mechanism	21100	18439	GO:0009987
query_1	FALSE	1	57	56	2	0.0357143	0.0350877	GO:0070228	GO:BP	regulation of lymphocyte apoptotic process	21100	18729	c("GO:0070227", "GO:2000106")
query_1	FALSE	1	35	56	1	0.0178571	0.0285714	GO:0071168	GO:BP	protein localization to chromatin	21100	19238	GO:0034502
query_1	FALSE	1	32	56	1	0.0178571	0.03125	GO:0070229	GO:BP	negative regulation of lymphocyte apoptotic process	21100	18730	c("GO:0070227", "GO:0070228", "GO:2000107")
query_1	FALSE	1	53	56	1	0.0178571	0.0188679	GO:0070231	GO:BP	T cell apoptotic process	21100	18732	GO:0070227
query_1	FALSE	1	324	56	1	0.0178571	0.00308642	GO:0070588	GO:BP	calcium ion transmembrane transport	21100	18944	c("GO:0006816", "GO:0098662")
query_1	FALSE	1	204	56	1	0.0178571	0.00490196	GO:0070646	GO:BP	protein modification by small protein removal	21100	18982	c("GO:0006508", "GO:0070647")
query_1	FALSE	1	331	56	1	0.0178571	0.00302115	GO:0070661	GO:BP	leukocyte proliferation	21100	18994	GO:0008283
query_1	FALSE	1	254	56	1	0.0178571	0.00393701	GO:0070663	GO:BP	regulation of leukocyte proliferation	21100	18996	c("GO:0042127", "GO:0070661")
query_1	FALSE	1	157	56	1	0.0178571	0.00636943	GO:0070665	GO:BP	positive regulation of leukocyte proliferation	21100	18998	c("GO:0008284", "GO:0070661", "GO:0070663")
query_1	FALSE	1	1922	56	8	0.142857	0.00416233	GO:0070727	GO:BP	cellular macromolecule localization	21100	19028	c("GO:0033036", "GO:0051641")
query_1	FALSE	1	130	56	1	0.0178571	0.00769231	GO:0070585	GO:BP	protein localization to mitochondrion	21100	18941	GO:0033365
query_1	FALSE	1	685	56	2	0.0357143	0.00291971	GO:0070848	GO:BP	response to growth factor	21100	19096	GO:0010033
query_1	FALSE	1	16	56	1	0.0178571	0.0625	GO:0070875	GO:BP	positive regulation of glycogen metabolic process	21100	19108	c("GO:0005977", "GO:0010604", "GO:0010907", "GO:0070873")
query_1	FALSE	1	3019	56	18	0.321429	0.00596224	GO:0070887	GO:BP	cellular response to chemical stimulus	21100	19115	c("GO:0042221", "GO:0051716")
query_1	FALSE	1	52	56	1	0.0178571	0.0192308	GO:0070918	GO:BP	primary sncRNA processing	21100	19132	c("GO:0031047", "GO:0034470")
query_1	FALSE	1	900	56	3	0.0535714	0.00333333	GO:0070925	GO:BP	organelle assembly	21100	19137	c("GO:0006996", "GO:0022607")
query_1	FALSE	1	67	56	1	0.0178571	0.0149254	GO:0070936	GO:BP	protein K48-linked ubiquitination	21100	19147	GO:0000209
query_1	FALSE	1	353	56	5	0.0892857	0.0141643	GO:0070997	GO:BP	neuron death	21100	19190	GO:0008219
query_1	FALSE	1	35	56	1	0.0178571	0.0285714	GO:0070873	GO:BP	regulation of glycogen metabolic process	21100	19106	c("GO:0005977", "GO:0010906", "GO:0032881", "GO:0043467")
query_1	FALSE	1	11	56	1	0.0178571	0.0909091	GO:0070561	GO:BP	vitamin D receptor signaling pathway	21100	18927	c("GO:0030522", "GO:0071305")
query_1	FALSE	1	153	56	1	0.0178571	0.00653595	GO:0070555	GO:BP	response to interleukin-1	21100	18925	GO:0034097
query_1	FALSE	1	36	56	1	0.0178571	0.0277778	GO:0070536	GO:BP	protein K63-linked deubiquitination	21100	18917	GO:0016579
query_1	FALSE	1	36	56	1	0.0178571	0.0277778	GO:0070232	GO:BP	regulation of T cell apoptotic process	21100	18733	c("GO:0070228", "GO:0070231")
query_1	FALSE	1	14	56	1	0.0178571	0.0714286	GO:0070234	GO:BP	positive regulation of T cell apoptotic process	21100	18735	c("GO:0070230", "GO:0070231", "GO:0070232")
query_1	FALSE	1	18	56	1	0.0178571	0.0555556	GO:0070242	GO:BP	thymocyte apoptotic process	21100	18743	GO:0070231
query_1	FALSE	1	13	56	1	0.0178571	0.0769231	GO:0070243	GO:BP	regulation of thymocyte apoptotic process	21100	18744	c("GO:0070232", "GO:0070242")
query_1	FALSE	1	5	56	1	0.0178571	0.2	GO:0070245	GO:BP	positive regulation of thymocyte apoptotic process	21100	18746	c("GO:0070234", "GO:0070242", "GO:0070243")
query_1	FALSE	1	9	56	1	0.0178571	0.111111	GO:0070292	GO:BP	N-acylphosphatidylethanolamine metabolic process	21100	18773	c("GO:0043603", "GO:0046337", "GO:1901564")
query_1	FALSE	1	86	56	3	0.0535714	0.0348837	GO:0070301	GO:BP	cellular response to hydrogen peroxide	21100	18781	c("GO:0034614", "GO:0042542")
query_1	FALSE	1	195	56	3	0.0535714	0.0153846	GO:0070302	GO:BP	regulation of stress-activated protein kinase signaling cascade	21100	18782	c("GO:0031098", "GO:0080135", "GO:1902531")
query_1	FALSE	1	130	56	2	0.0357143	0.0153846	GO:0070304	GO:BP	positive regulation of stress-activated protein kinase signaling cascade	21100	18784	c("GO:0031098", "GO:0070302", "GO:1902533")
query_1	FALSE	1	38	56	1	0.0178571	0.0263158	GO:0070306	GO:BP	lens fiber cell differentiation	21100	18786	c("GO:0002088", "GO:0030855")
query_1	FALSE	1	12	56	1	0.0178571	0.0833333	GO:0070341	GO:BP	fat cell proliferation	21100	18803	GO:0008283
query_1	FALSE	1	2	56	1	0.0178571	0.5	GO:0070342	GO:BP	brown fat cell proliferation	21100	18804	GO:0070341
query_1	FALSE	1	7	56	1	0.0178571	0.142857	GO:0070358	GO:BP	actin polymerization-dependent cell motility	21100	18815	GO:0048870
query_1	FALSE	1	339	56	2	0.0357143	0.00589971	GO:0070482	GO:BP	response to oxygen levels	21100	18886	GO:0009628
query_1	FALSE	1	70	56	1	0.0178571	0.0142857	GO:0070527	GO:BP	platelet aggregation	21100	18913	c("GO:0030168", "GO:0034109")
query_1	FALSE	1	18	56	1	0.0178571	0.0555556	GO:0070230	GO:BP	positive regulation of lymphocyte apoptotic process	21100	18731	c("GO:0070227", "GO:0070228", "GO:2000108")
query_1	FALSE	1	571	56	5	0.0892857	0.00875657	GO:1905114	GO:BP	cell surface receptor signaling pathway involved in cell-cell signaling	21100	28024	c("GO:0007166", "GO:0007267")
query_1	FALSE	1	29	56	1	0.0178571	0.0344828	GO:2000108	GO:BP	positive regulation of leukocyte apoptotic process	21100	29332	c("GO:0043065", "GO:0071887", "GO:2000106")
query_1	FALSE	1	110	56	2	0.0357143	0.0181818	GO:1905477	GO:BP	positive regulation of protein localization to membrane	21100	28367	c("GO:0048522", "GO:0072657", "GO:1903829", "GO:1905475")
query_1	FALSE	1	181	56	4	0.0714286	0.0220994	GO:1905475	GO:BP	regulation of protein localization to membrane	21100	28365	c("GO:0032880", "GO:0060341", "GO:0072657")
query_1	FALSE	1	51	56	1	0.0178571	0.0196078	GO:2000059	GO:BP	negative regulation of ubiquitin-dependent protein catabolic process	21100	29284	c("GO:0006511", "GO:1903051", "GO:2000058")
query_1	FALSE	1	110	56	1	0.0178571	0.00909091	GO:2000060	GO:BP	positive regulation of ubiquitin-dependent protein catabolic process	21100	29285	c("GO:0006511", "GO:1903052", "GO:2000058")
query_1	FALSE	1	85	56	3	0.0535714	0.0352941	GO:2000106	GO:BP	regulation of leukocyte apoptotic process	21100	29330	c("GO:0042981", "GO:0071887")
query_1	FALSE	1	48	56	1	0.0178571	0.0208333	GO:2000107	GO:BP	negative regulation of leukocyte apoptotic process	21100	29331	c("GO:0043066", "GO:0071887", "GO:2000106")
query_1	FALSE	1	1487	56	2	0.0357143	0.00134499	GO:0050877	GO:BP	nervous system process	21100	15393	GO:0003008
query_1	FALSE	1	483	56	2	0.0357143	0.00414079	GO:2000112	GO:BP	regulation of cellular macromolecule biosynthetic process	21100	29336	c("GO:0010556", "GO:0031326", "GO:0034645")
query_1	FALSE	1	171	56	2	0.0357143	0.0116959	GO:2000058	GO:BP	regulation of ubiquitin-dependent protein catabolic process	21100	29283	c("GO:0006511", "GO:1903050")
query_1	FALSE	1	228	56	2	0.0357143	0.00877193	GO:2000116	GO:BP	regulation of cysteine-type endopeptidase activity	21100	29340	GO:0052548
query_1	FALSE	1	18	56	1	0.0178571	0.0555556	GO:2000136	GO:BP	regulation of cell proliferation involved in heart morphogenesis	21100	29360	c("GO:0042127", "GO:0061323")
query_1	FALSE	1	7	56	1	0.0178571	0.142857	GO:2000138	GO:BP	positive regulation of cell proliferation involved in heart morphogenesis	21100	29362	c("GO:0008284", "GO:0061323", "GO:2000136")
query_1	FALSE	1	952	56	5	0.0892857	0.0052521	GO:2000145	GO:BP	regulation of cell motility	21100	29369	c("GO:0040012", "GO:0048870", "GO:0051270")
query_1	FALSE	1	281	56	2	0.0357143	0.00711744	GO:2000146	GO:BP	negative regulation of cell motility	21100	29370	c("GO:0040013", "GO:0048870", "GO:0051271", "GO:2000145")
query_1	FALSE	1	547	56	2	0.0357143	0.00365631	GO:2000147	GO:BP	positive regulation of cell motility	21100	29371	c("GO:0040017", "GO:0048870", "GO:0051272", "GO:2000145")
query_1	FALSE	1	34	56	1	0.0178571	0.0294118	GO:2000191	GO:BP	regulation of fatty acid transport	21100	29413	c("GO:0015908", "GO:0032368", "GO:0032890")
query_1	FALSE	1	83	56	1	0.0178571	0.0120482	GO:2000117	GO:BP	negative regulation of cysteine-type endopeptidase activity	21100	29341	c("GO:0010951", "GO:2000116")
query_1	FALSE	1	8	56	1	0.0178571	0.125	GO:2000192	GO:BP	negative regulation of fatty acid transport	21100	29414	c("GO:0015908", "GO:0032369", "GO:0032891", "GO:2000191")
query_1	FALSE	1	1345	56	7	0.125	0.00520446	GO:2000026	GO:BP	regulation of multicellular organismal development	21100	29251	c("GO:0007275", "GO:0050793", "GO:0051239")
query_1	FALSE	1	78	56	1	0.0178571	0.0128205	GO:1990849	GO:BP	vacuolar localization	21100	29153	GO:0051640
query_1	FALSE	1	18	56	1	0.0178571	0.0555556	GO:1905709	GO:BP	negative regulation of membrane permeability	21100	28584	GO:0090559
query_1	FALSE	1	51	56	2	0.0357143	0.0392157	GO:1905710	GO:BP	positive regulation of membrane permeability	21100	28585	GO:0090559
query_1	FALSE	1	9	56	1	0.0178571	0.111111	GO:1905719	GO:BP	protein localization to perinuclear region of cytoplasm	21100	28593	GO:0008104
query_1	FALSE	1	15	56	1	0.0178571	0.0666667	GO:1905874	GO:BP	regulation of postsynaptic density organization	21100	28725	c("GO:0033043", "GO:0097106", "GO:0099175")
query_1	FALSE	1	83	56	1	0.0178571	0.0120482	GO:1905897	GO:BP	regulation of response to endoplasmic reticulum stress	21100	28747	c("GO:0034976", "GO:0080135")
query_1	FALSE	1	36	56	1	0.0178571	0.0277778	GO:1905898	GO:BP	positive regulation of response to endoplasmic reticulum stress	21100	28748	c("GO:0034976", "GO:0048522", "GO:0048584", "GO:1905897")
query_1	FALSE	1	59	56	1	0.0178571	0.0169492	GO:1990874	GO:BP	vascular associated smooth muscle cell proliferation	21100	29168	GO:0048659
query_1	FALSE	1	164	56	1	0.0178571	0.00609756	GO:1905952	GO:BP	regulation of lipid localization	21100	28800	c("GO:0010876", "GO:0032879")
query_1	FALSE	1	173	56	1	0.0178571	0.00578035	GO:1990138	GO:BP	neuron projection extension	21100	28860	c("GO:0048588", "GO:0048812", "GO:0060560")
query_1	FALSE	1	6	56	1	0.0178571	0.166667	GO:1990569	GO:BP	UDP-N-acetylglucosamine transmembrane transport	21100	29034	c("GO:0015711", "GO:0090481", "GO:0098656")
query_1	FALSE	1	336	56	1	0.0178571	0.00297619	GO:1990778	GO:BP	protein localization to cell periphery	21100	29114	GO:0034613
query_1	FALSE	1	100	56	1	0.0178571	0.01	GO:1990823	GO:BP	response to leukemia inhibitory factor	21100	29140	GO:0034097
query_1	FALSE	1	99	56	1	0.0178571	0.010101	GO:1990830	GO:BP	cellular response to leukemia inhibitory factor	21100	29142	c("GO:0071345", "GO:1990823")
query_1	FALSE	1	160	56	1	0.0178571	0.00625	GO:1990845	GO:BP	adaptive thermogenesis	21100	29150	GO:0008152
query_1	FALSE	1	46	56	1	0.0178571	0.0217391	GO:1905953	GO:BP	negative regulation of lipid localization	21100	28801	c("GO:0010876", "GO:0048519", "GO:1905952")
query_1	FALSE	1	3	56	1	0.0178571	0.333333	GO:2000211	GO:BP	regulation of glutamate metabolic process	21100	29433	c("GO:0000820", "GO:0006536")
query_1	FALSE	1	3	56	1	0.0178571	0.333333	GO:2000312	GO:BP	regulation of kainate selective glutamate receptor activity	21100	29534	c("GO:0099601", "GO:1901016", "GO:2000649", "GO:2001257")
query_1	FALSE	1	103	56	1	0.0178571	0.00970874	GO:2001252	GO:BP	positive regulation of chromosome organization	21100	30416	c("GO:0010638", "GO:0033044", "GO:0051276")
query_1	FALSE	1	169	56	1	0.0178571	0.00591716	GO:2001257	GO:BP	regulation of cation channel activity	21100	30421	c("GO:0032412", "GO:1904062")
query_1	FALSE	1	6	56	1	0.0178571	0.166667	GO:2001270	GO:BP	regulation of cysteine-type endopeptidase activity involved in execution phase of apoptosis	21100	30434	GO:0043281
query_1	FALSE	1	3	56	1	0.0178571	0.333333	GO:2001271	GO:BP	negative regulation of cysteine-type endopeptidase activity involved in execution phase of apoptosis	21100	30435	c("GO:0043154", "GO:1900118", "GO:2001270")
query_1	FALSE	1	90	56	1	0.0178571	0.0111111	GO:2001251	GO:BP	negative regulation of chromosome organization	21100	30415	c("GO:0010639", "GO:0033044", "GO:0051276")
query_1	FALSE	1	124	56	1	0.0178571	0.00806452	GO:2000278	GO:BP	regulation of DNA biosynthetic process	21100	29500	c("GO:0010556", "GO:0031326", "GO:0051052", "GO:0071897")
query_1	FALSE	1	58	56	1	0.0178571	0.0172414	GO:2001244	GO:BP	positive regulation of intrinsic apoptotic signaling pathway	21100	30408	c("GO:0097193", "GO:1902533", "GO:2001235", "GO:2001242")
query_1	FALSE	1	128	56	1	0.0178571	0.0078125	GO:2001235	GO:BP	positive regulation of apoptotic signaling pathway	21100	30399	c("GO:0009967", "GO:0043065", "GO:0097190", "GO:2001233")
query_1	FALSE	1	7	56	1	0.0178571	0.142857	GO:2000489	GO:BP	regulation of hepatic stellate cell activation	21100	29705	c("GO:0035733", "GO:0050865")
query_1	FALSE	1	2	56	1	0.0178571	0.5	GO:2000490	GO:BP	negative regulation of hepatic stellate cell activation	21100	29706	c("GO:0035733", "GO:0050866", "GO:2000489")
query_1	FALSE	1	65	56	1	0.0178571	0.0153846	GO:2000514	GO:BP	regulation of CD4-positive, alpha-beta T cell activation	21100	29727	c("GO:0035710", "GO:0046634")
query_1	FALSE	1	37	56	1	0.0178571	0.027027	GO:2000516	GO:BP	positive regulation of CD4-positive, alpha-beta T cell activation	21100	29729	c("GO:0035710", "GO:0046635", "GO:2000514")
query_1	FALSE	1	74	56	1	0.0178571	0.0135135	GO:2000573	GO:BP	positive regulation of DNA biosynthetic process	21100	29786	c("GO:0010557", "GO:0031328", "GO:0051054", "GO:0071897", "GO:2000278")
query_1	FALSE	1	54	56	1	0.0178571	0.0185185	GO:2000649	GO:BP	regulation of sodium ion transmembrane transporter activity	21100	29859	c("GO:0032412", "GO:1902305")
query_1	FALSE	1	166	56	1	0.0178571	0.0060241	GO:2001242	GO:BP	regulation of intrinsic apoptotic signaling pathway	21100	30406	c("GO:0097193", "GO:1902531", "GO:2001233")
query_1	FALSE	1	71	56	1	0.0178571	0.0140845	GO:2000756	GO:BP	regulation of peptidyl-lysine acetylation	21100	29959	c("GO:0018394", "GO:1901983")
query_1	FALSE	1	41	56	1	0.0178571	0.0243902	GO:2000772	GO:BP	regulation of cellular senescence	21100	29975	c("GO:0031323", "GO:0090398")
query_1	FALSE	1	44	56	1	0.0178571	0.0227273	GO:2000785	GO:BP	regulation of autophagosome assembly	21100	29987	c("GO:0000045", "GO:0044088", "GO:1902115")
query_1	FALSE	1	19	56	1	0.0178571	0.0526316	GO:2000786	GO:BP	positive regulation of autophagosome assembly	21100	29988	c("GO:0000045", "GO:0016239", "GO:0044090", "GO:1902117", "GO:2000785")
query_1	FALSE	1	145	56	1	0.0178571	0.00689655	GO:2001056	GO:BP	positive regulation of cysteine-type endopeptidase activity	21100	30252	c("GO:0010950", "GO:2000116")
query_1	FALSE	1	3461	56	16	0.285714	0.00462294	GO:2001141	GO:BP	regulation of RNA biosynthetic process	21100	30316	c("GO:0010556", "GO:0031326", "GO:0032774", "GO:0051252")
query_1	FALSE	1	224	56	4	0.0714286	0.0178571	GO:2001234	GO:BP	negative regulation of apoptotic signaling pathway	21100	30398	c("GO:0009968", "GO:0043066", "GO:0097190", "GO:2001233")
query_1	FALSE	1	37	56	1	0.0178571	0.027027	GO:2000758	GO:BP	positive regulation of peptidyl-lysine acetylation	21100	29961	c("GO:0018394", "GO:1901985", "GO:2000756")
query_1	FALSE	1	51	56	1	0.0178571	0.0196078	GO:0050873	GO:BP	brown fat cell differentiation	21100	15392	GO:0045444
query_1	FALSE	1	212	56	2	0.0357143	0.00943396	GO:0050803	GO:BP	regulation of synapse structure or activity	21100	15332	GO:0065008
query_1	FALSE	1	221	56	1	0.0178571	0.00452489	GO:0050870	GO:BP	positive regulation of T cell activation	21100	15389	c("GO:0042110", "GO:0050863", "GO:0051251", "GO:1903039")
query_1	FALSE	1	339	56	3	0.0535714	0.00884956	GO:0010506	GO:BP	regulation of autophagy	21100	4672	c("GO:0006914", "GO:0031329")
query_1	FALSE	1	83	56	1	0.0178571	0.0120482	GO:0010507	GO:BP	negative regulation of autophagy	21100	4673	c("GO:0006914", "GO:0010506", "GO:0031330")
query_1	FALSE	1	141	56	3	0.0535714	0.0212766	GO:0010508	GO:BP	positive regulation of autophagy	21100	4674	c("GO:0006914", "GO:0010506", "GO:0031331")
query_1	FALSE	1	27	56	1	0.0178571	0.037037	GO:0010528	GO:BP	regulation of transposition	21100	4693	c("GO:0032196", "GO:0050794")
query_1	FALSE	1	27	56	1	0.0178571	0.037037	GO:0010529	GO:BP	negative regulation of transposition	21100	4694	c("GO:0010528", "GO:0032196", "GO:0048523")
query_1	FALSE	1	3926	56	18	0.321429	0.00458482	GO:0010556	GO:BP	regulation of macromolecule biosynthetic process	21100	4707	c("GO:0009059", "GO:0009889", "GO:0060255")
query_1	FALSE	1	509	56	5	0.0892857	0.00982318	GO:0010498	GO:BP	proteasomal protein catabolic process	21100	4665	c("GO:0030163", "GO:0051603")
query_1	FALSE	1	1859	56	10	0.178571	0.00537924	GO:0010557	GO:BP	positive regulation of macromolecule biosynthetic process	21100	4708	c("GO:0009059", "GO:0009891", "GO:0010556", "GO:0010604")
query_1	FALSE	1	895	56	1	0.0178571	0.00111732	GO:0010562	GO:BP	positive regulation of phosphorus metabolic process	21100	4713	c("GO:0006793", "GO:0031325", "GO:0051174")
query_1	FALSE	1	418	56	2	0.0357143	0.00478469	GO:0010563	GO:BP	negative regulation of phosphorus metabolic process	21100	4714	c("GO:0006793", "GO:0031324", "GO:0051174")
query_1	FALSE	1	695	56	2	0.0357143	0.0028777	GO:0010564	GO:BP	regulation of cell cycle process	21100	4715	c("GO:0022402", "GO:0051726")
query_1	FALSE	1	147	56	2	0.0357143	0.0136054	GO:0010565	GO:BP	regulation of cellular ketone metabolic process	21100	4716	c("GO:0031323", "GO:0042180", "GO:0062012")
query_1	FALSE	1	167	56	1	0.0178571	0.00598802	GO:0010594	GO:BP	regulation of endothelial cell migration	21100	4741	c("GO:0010632", "GO:0043542")
query_1	FALSE	1	105	56	1	0.0178571	0.00952381	GO:0010595	GO:BP	positive regulation of endothelial cell migration	21100	4742	c("GO:0010594", "GO:0010634", "GO:0043542")
query_1	FALSE	1	1508	56	5	0.0892857	0.00331565	GO:0010558	GO:BP	negative regulation of macromolecule biosynthetic process	21100	4709	c("GO:0009059", "GO:0009890", "GO:0010556", "GO:0010605")
query_1	FALSE	1	3465	56	13	0.232143	0.0037518	GO:0010604	GO:BP	positive regulation of macromolecule metabolic process	21100	4750	c("GO:0009893", "GO:0043170", "GO:0060255")
query_1	FALSE	1	170	56	1	0.0178571	0.00588235	GO:0010469	GO:BP	regulation of signaling receptor activity	21100	4650	c("GO:0009966", "GO:0065009")
query_1	FALSE	1	8963	56	21	0.375	0.00234297	GO:0010467	GO:BP	gene expression	21100	4648	GO:0043170
query_1	FALSE	1	1243	56	6	0.107143	0.00482703	GO:0009968	GO:BP	negative regulation of signal transduction	21100	4268	c("GO:0007165", "GO:0009966", "GO:0010648", "GO:0023057", "GO:0048585")
query_1	FALSE	1	19395	56	55	0.982143	0.00283578	GO:0009987	GO:BP	cellular process	21100	4273	GO:0008150
query_1	FALSE	1	490	56	6	0.107143	0.0122449	GO:0009991	GO:BP	response to extracellular stimulus	21100	4277	GO:0009605
query_1	FALSE	1	3010	56	15	0.267857	0.00498339	GO:0010033	GO:BP	response to organic substance	21100	4307	GO:0042221
query_1	FALSE	1	538	56	6	0.107143	0.0111524	GO:0010035	GO:BP	response to inorganic substance	21100	4309	GO:0042221
query_1	FALSE	1	350	56	3	0.0535714	0.00857143	GO:0010038	GO:BP	response to metal ion	21100	4312	GO:0010035
query_1	FALSE	1	5452	56	20	0.357143	0.00366838	GO:0010468	GO:BP	regulation of gene expression	21100	4649	c("GO:0010467", "GO:0060255")
query_1	FALSE	1	31	56	1	0.0178571	0.0322581	GO:0010039	GO:BP	response to iron ion	21100	4313	GO:0010038
query_1	FALSE	1	1010	56	5	0.0892857	0.0049505	GO:0010243	GO:BP	response to organonitrogen compound	21100	4496	c("GO:0010033", "GO:1901698")
query_1	FALSE	1	550	56	2	0.0357143	0.00363636	GO:0010256	GO:BP	endomembrane system organization	21100	4508	GO:0016043
query_1	FALSE	1	117	56	1	0.0178571	0.00854701	GO:0010389	GO:BP	regulation of G2/M transition of mitotic cell cycle	21100	4580	c("GO:0000086", "GO:1901990", "GO:1902749")
query_1	FALSE	1	44	56	1	0.0178571	0.0227273	GO:0010463	GO:BP	mesenchymal cell proliferation	21100	4645	GO:0008283
query_1	FALSE	1	31	56	1	0.0178571	0.0322581	GO:0010464	GO:BP	regulation of mesenchymal cell proliferation	21100	4646	c("GO:0010463", "GO:0042127")
query_1	FALSE	1	249	56	1	0.0178571	0.00401606	GO:0010466	GO:BP	negative regulation of peptidase activity	21100	4647	c("GO:0045861", "GO:0051346", "GO:0052547")
query_1	FALSE	1	142	56	1	0.0178571	0.00704225	GO:0010212	GO:BP	response to ionizing radiation	21100	4468	GO:0009314
query_1	FALSE	1	3361	56	14	0.25	0.00416543	GO:0010605	GO:BP	negative regulation of macromolecule metabolic process	21100	4751	c("GO:0009892", "GO:0043170", "GO:0060255")
query_1	FALSE	1	1104	56	1	0.0178571	0.000905797	GO:0010608	GO:BP	post-transcriptional regulation of gene expression	21100	4754	GO:0010468
query_1	FALSE	1	1135	56	4	0.0714286	0.00352423	GO:0010628	GO:BP	positive regulation of gene expression	21100	4773	c("GO:0010467", "GO:0010468", "GO:0010604")
query_1	FALSE	1	4	56	1	0.0178571	0.25	GO:0010748	GO:BP	negative regulation of long-chain fatty acid import across plasma membrane	21100	4885	c("GO:0010746", "GO:0015911", "GO:0034763", "GO:0140213")
query_1	FALSE	1	48	56	2	0.0357143	0.0416667	GO:0010761	GO:BP	fibroblast migration	21100	4898	GO:0001667
query_1	FALSE	1	35	56	1	0.0178571	0.0285714	GO:0010762	GO:BP	regulation of fibroblast migration	21100	4899	c("GO:0010761", "GO:0030334")
query_1	FALSE	1	53	56	1	0.0178571	0.0188679	GO:0010803	GO:BP	regulation of tumor necrosis factor-mediated signaling pathway	21100	4939	c("GO:0001959", "GO:0033209")
query_1	FALSE	1	25	56	1	0.0178571	0.04	GO:0010804	GO:BP	negative regulation of tumor necrosis factor-mediated signaling pathway	21100	4940	c("GO:0001960", "GO:0010803", "GO:0033209")
query_1	FALSE	1	502	56	2	0.0357143	0.00398406	GO:0010817	GO:BP	regulation of hormone levels	21100	4951	GO:0065008
query_1	FALSE	1	6	56	1	0.0178571	0.166667	GO:0010746	GO:BP	regulation of long-chain fatty acid import across plasma membrane	21100	4883	c("GO:0015911", "GO:0034762", "GO:0140212")
query_1	FALSE	1	152	56	3	0.0535714	0.0197368	GO:0010821	GO:BP	regulation of mitochondrion organization	21100	4955	c("GO:0007005", "GO:0033043")
query_1	FALSE	1	47	56	1	0.0178571	0.0212766	GO:0010823	GO:BP	negative regulation of mitochondrion organization	21100	4957	c("GO:0007005", "GO:0010639", "GO:0010821")
query_1	FALSE	1	73	56	1	0.0178571	0.0136986	GO:0010827	GO:BP	regulation of glucose transmembrane transport	21100	4961	c("GO:0034762", "GO:1904659")
query_1	FALSE	1	43	56	1	0.0178571	0.0232558	GO:0010828	GO:BP	positive regulation of glucose transmembrane transport	21100	4962	c("GO:0010827", "GO:0034764", "GO:1904659")
query_1	FALSE	1	84	56	1	0.0178571	0.0119048	GO:0010833	GO:BP	telomere maintenance via telomere lengthening	21100	4967	GO:0000723
query_1	FALSE	1	455	56	1	0.0178571	0.0021978	GO:0010876	GO:BP	lipid localization	21100	4997	GO:0033036
query_1	FALSE	1	118	56	1	0.0178571	0.00847458	GO:0010906	GO:BP	regulation of glucose metabolic process	21100	5027	c("GO:0006006", "GO:0010675", "GO:0062012")
query_1	FALSE	1	81	56	1	0.0178571	0.0123457	GO:0010822	GO:BP	positive regulation of mitochondrion organization	21100	4956	c("GO:0007005", "GO:0010638", "GO:0010821")
query_1	FALSE	1	21	56	1	0.0178571	0.047619	GO:0010738	GO:BP	regulation of protein kinase A signaling	21100	4877	c("GO:0010737", "GO:1902531")
query_1	FALSE	1	37	56	1	0.0178571	0.027027	GO:0010737	GO:BP	protein kinase A signaling	21100	4876	GO:0035556
query_1	FALSE	1	174	56	1	0.0178571	0.00574713	GO:0010721	GO:BP	negative regulation of cell development	21100	4861	c("GO:0045596", "GO:0048468", "GO:0060284")
query_1	FALSE	1	1579	56	5	0.0892857	0.00316656	GO:0010629	GO:BP	negative regulation of gene expression	21100	4774	c("GO:0010467", "GO:0010468", "GO:0010605")
query_1	FALSE	1	293	56	1	0.0178571	0.00341297	GO:0010631	GO:BP	epithelial cell migration	21100	4776	c("GO:0001667", "GO:0090132")
query_1	FALSE	1	225	56	1	0.0178571	0.00444444	GO:0010632	GO:BP	regulation of epithelial cell migration	21100	4777	c("GO:0010631", "GO:0030334", "GO:0051239")
query_1	FALSE	1	147	56	1	0.0178571	0.00680272	GO:0010634	GO:BP	positive regulation of epithelial cell migration	21100	4779	c("GO:0010631", "GO:0010632", "GO:0030335")
query_1	FALSE	1	509	56	3	0.0535714	0.00589391	GO:0010638	GO:BP	positive regulation of organelle organization	21100	4783	c("GO:0006996", "GO:0033043", "GO:0051130")
query_1	FALSE	1	352	56	2	0.0357143	0.00568182	GO:0010639	GO:BP	negative regulation of organelle organization	21100	4784	c("GO:0006996", "GO:0033043", "GO:0051129")
query_1	FALSE	1	3336	56	18	0.321429	0.00539568	GO:0010646	GO:BP	regulation of cell communication	21100	4791	c("GO:0007154", "GO:0050794")
query_1	FALSE	1	1711	56	10	0.178571	0.00584454	GO:0010647	GO:BP	positive regulation of cell communication	21100	4792	c("GO:0007154", "GO:0010646", "GO:0048522")
query_1	FALSE	1	1351	56	6	0.107143	0.00444115	GO:0010648	GO:BP	negative regulation of cell communication	21100	4793	c("GO:0007154", "GO:0010646", "GO:0048523")
query_1	FALSE	1	38	56	1	0.0178571	0.0263158	GO:0010656	GO:BP	negative regulation of muscle cell apoptotic process	21100	4800	c("GO:0010657", "GO:0010660", "GO:0043066")
query_1	FALSE	1	66	56	1	0.0178571	0.0151515	GO:0010657	GO:BP	muscle cell apoptotic process	21100	4801	GO:0006915
query_1	FALSE	1	62	56	1	0.0178571	0.016129	GO:0010660	GO:BP	regulation of muscle cell apoptotic process	21100	4804	c("GO:0010657", "GO:0042981")
query_1	FALSE	1	148	56	1	0.0178571	0.00675676	GO:0010675	GO:BP	regulation of cellular carbohydrate metabolic process	21100	4819	c("GO:0006109", "GO:0031323", "GO:0044262")
query_1	FALSE	1	53	56	1	0.0178571	0.0188679	GO:0010676	GO:BP	positive regulation of cellular carbohydrate metabolic process	21100	4820	c("GO:0010675", "GO:0031325", "GO:0044262", "GO:0045913")
query_1	FALSE	1	296	56	1	0.0178571	0.00337838	GO:0010720	GO:BP	positive regulation of cell development	21100	4860	c("GO:0045597", "GO:0048468", "GO:0060284")
query_1	FALSE	1	1513	56	8	0.142857	0.00528751	GO:0009967	GO:BP	positive regulation of signal transduction	21100	4267	c("GO:0007165", "GO:0009966", "GO:0010647", "GO:0023056", "GO:0048584")
query_1	FALSE	1	39	56	1	0.0178571	0.025641	GO:0010907	GO:BP	positive regulation of glucose metabolic process	21100	5028	c("GO:0006006", "GO:0010676", "GO:0010906", "GO:0062013")
query_1	FALSE	1	2947	56	16	0.285714	0.00542925	GO:0009966	GO:BP	regulation of signal transduction	21100	4266	c("GO:0007165", "GO:0010646", "GO:0023051", "GO:0048583")
query_1	FALSE	1	218	56	1	0.0178571	0.00458716	GO:0009913	GO:BP	epidermal cell differentiation	21100	4229	c("GO:0008544", "GO:0030855")
query_1	FALSE	1	44	56	1	0.0178571	0.0227273	GO:0008542	GO:BP	visual learning	21100	3612	c("GO:0007632", "GO:0008306")
query_1	FALSE	1	351	56	1	0.0178571	0.002849	GO:0008544	GO:BP	epidermis development	21100	3614	GO:0009888
query_1	FALSE	1	141	56	1	0.0178571	0.0070922	GO:0008584	GO:BP	male gonad development	21100	3618	c("GO:0008406", "GO:0046546")
query_1	FALSE	1	700	56	1	0.0178571	0.00142857	GO:0008610	GO:BP	lipid biosynthetic process	21100	3629	c("GO:0006629", "GO:1901576")
query_1	FALSE	1	83	56	2	0.0357143	0.0240964	GO:0008625	GO:BP	extrinsic apoptotic signaling pathway via death domain receptors	21100	3637	GO:0097191
query_1	FALSE	1	107	56	2	0.0357143	0.0186916	GO:0008630	GO:BP	intrinsic apoptotic signaling pathway in response to DNA damage	21100	3641	c("GO:0006974", "GO:0097193")
query_1	FALSE	1	226	56	1	0.0178571	0.00442478	GO:0008406	GO:BP	gonad development	21100	3609	c("GO:0045137", "GO:0048513", "GO:0048608")
query_1	FALSE	1	107	56	3	0.0535714	0.0280374	GO:0008637	GO:BP	apoptotic mitochondrial changes	21100	3647	c("GO:0006915", "GO:0007005")
query_1	FALSE	1	113	56	1	0.0178571	0.00884956	GO:0008645	GO:BP	hexose transmembrane transport	21100	3649	GO:0015749
query_1	FALSE	1	264	56	1	0.0178571	0.00378788	GO:0008654	GO:BP	phospholipid biosynthetic process	21100	3652	c("GO:0006644", "GO:0008610", "GO:0044249", "GO:0090407")
query_1	FALSE	1	2559	56	13	0.232143	0.00508011	GO:0009056	GO:BP	catabolic process	21100	3659	GO:0008152
query_1	FALSE	1	1359	56	7	0.125	0.00515085	GO:0009057	GO:BP	macromolecule catabolic process	21100	3660	c("GO:0043170", "GO:1901575")
query_1	FALSE	1	5861	56	23	0.410714	0.00392425	GO:0009058	GO:BP	biosynthetic process	21100	3661	GO:0008152
query_1	FALSE	1	4770	56	19	0.339286	0.00398323	GO:0009059	GO:BP	macromolecule biosynthetic process	21100	3662	c("GO:0043170", "GO:1901576")
query_1	FALSE	1	155	56	2	0.0357143	0.0129032	GO:0008643	GO:BP	carbohydrate transport	21100	3648	GO:0071702
query_1	FALSE	1	102	56	1	0.0178571	0.00980392	GO:0009062	GO:BP	fatty acid catabolic process	21100	3665	c("GO:0006631", "GO:0044242", "GO:0072329")
query_1	FALSE	1	1844	56	2	0.0357143	0.0010846	GO:0008380	GO:BP	RNA splicing	21100	3608	GO:0006396
query_1	FALSE	1	19	56	1	0.0178571	0.0526316	GO:0008340	GO:BP	determination of adult lifespan	21100	3585	GO:0032501
query_1	FALSE	1	34	56	1	0.0178571	0.0294118	GO:0007616	GO:BP	long-term memory	21100	3476	GO:0007613
query_1	FALSE	1	210	56	1	0.0178571	0.0047619	GO:0007623	GO:BP	circadian rhythm	21100	3483	GO:0048511
query_1	FALSE	1	49	56	1	0.0178571	0.0204082	GO:0007632	GO:BP	visual behavior	21100	3492	c("GO:0007610", "GO:0009416")
query_1	FALSE	1	502	56	3	0.0535714	0.0059761	GO:0008015	GO:BP	blood circulation	21100	3500	GO:0003013
query_1	FALSE	1	2665	56	11	0.196429	0.00412758	GO:0008104	GO:BP	protein localization	21100	3529	GO:0033036
query_1	FALSE	1	21100	56	56	1	0.00265403	GO:0008150	GO:BP	biological_process	21100	3530	character(0)
query_1	FALSE	1	184	56	2	0.0357143	0.0108696	GO:0008361	GO:BP	regulation of cell size	21100	3600	GO:0032535
query_1	FALSE	1	14415	56	43	0.767857	0.002983	GO:0008152	GO:BP	metabolic process	21100	3531	GO:0008150
query_1	FALSE	1	186	56	1	0.0178571	0.00537634	GO:0008217	GO:BP	regulation of blood pressure	21100	3558	c("GO:0008015", "GO:0065008")
query_1	FALSE	1	1958	56	13	0.232143	0.00663943	GO:0008283	GO:BP	cell population proliferation	21100	3567	GO:0009987
query_1	FALSE	1	929	56	4	0.0714286	0.00430571	GO:0008284	GO:BP	positive regulation of cell population proliferation	21100	3568	c("GO:0008283", "GO:0042127", "GO:0048522")
query_1	FALSE	1	713	56	3	0.0535714	0.00420757	GO:0008285	GO:BP	negative regulation of cell population proliferation	21100	3569	c("GO:0008283", "GO:0042127", "GO:0048523")
query_1	FALSE	1	114	56	1	0.0178571	0.00877193	GO:0008286	GO:BP	insulin receptor signaling pathway	21100	3570	c("GO:0007169", "GO:0032869")
query_1	FALSE	1	82	56	1	0.0178571	0.0121951	GO:0008306	GO:BP	associative learning	21100	3579	GO:0007612
query_1	FALSE	1	204	56	1	0.0178571	0.00490196	GO:0008213	GO:BP	protein alkylation	21100	3554	GO:0006464
query_1	FALSE	1	79	56	3	0.0535714	0.0379747	GO:0009064	GO:BP	glutamine family amino acid metabolic process	21100	3667	GO:1901605
query_1	FALSE	1	45	56	1	0.0178571	0.0222222	GO:0009250	GO:BP	glucan biosynthetic process	21100	3847	c("GO:0006073", "GO:0033692")
query_1	FALSE	1	180	56	3	0.0535714	0.0166667	GO:0009266	GO:BP	response to temperature stimulus	21100	3863	GO:0009628
query_1	FALSE	1	189	56	4	0.0714286	0.021164	GO:0009749	GO:BP	response to glucose	21100	4097	GO:0009746
query_1	FALSE	1	191	56	1	0.0178571	0.0052356	GO:0009755	GO:BP	hormone-mediated signaling pathway	21100	4103	c("GO:0007165", "GO:0032870")
query_1	FALSE	1	1110	56	5	0.0892857	0.0045045	GO:0009790	GO:BP	embryo development	21100	4132	GO:0007275
query_1	FALSE	1	674	56	4	0.0714286	0.00593472	GO:0009792	GO:BP	embryo development ending in birth or egg hatching	21100	4134	GO:0009790
query_1	FALSE	1	1072	56	3	0.0535714	0.00279851	GO:0009887	GO:BP	animal organ morphogenesis	21100	4207	c("GO:0009653", "GO:0048513")
query_1	FALSE	1	1940	56	7	0.125	0.00360825	GO:0009888	GO:BP	tissue development	21100	4208	GO:0048856
query_1	FALSE	1	193	56	4	0.0714286	0.0207254	GO:0009746	GO:BP	response to hexose	21100	4094	GO:0034284
query_1	FALSE	1	4145	56	19	0.339286	0.00458384	GO:0009889	GO:BP	regulation of biosynthetic process	21100	4209	c("GO:0009058", "GO:0019222")
query_1	FALSE	1	1999	56	10	0.178571	0.0050025	GO:0009891	GO:BP	positive regulation of biosynthetic process	21100	4211	c("GO:0009058", "GO:0009889", "GO:0009893")
query_1	FALSE	1	3570	56	15	0.267857	0.00420168	GO:0009892	GO:BP	negative regulation of metabolic process	21100	4212	c("GO:0008152", "GO:0019222", "GO:0048519")
query_1	FALSE	1	3776	56	15	0.267857	0.00397246	GO:0009893	GO:BP	positive regulation of metabolic process	21100	4213	c("GO:0008152", "GO:0019222", "GO:0048518")
query_1	FALSE	1	1009	56	6	0.107143	0.00594648	GO:0009894	GO:BP	regulation of catabolic process	21100	4214	c("GO:0009056", "GO:0019222")
query_1	FALSE	1	325	56	2	0.0357143	0.00615385	GO:0009895	GO:BP	negative regulation of catabolic process	21100	4215	c("GO:0009056", "GO:0009892", "GO:0009894")
query_1	FALSE	1	519	56	5	0.0892857	0.00963391	GO:0009896	GO:BP	positive regulation of catabolic process	21100	4216	c("GO:0009056", "GO:0009893", "GO:0009894")
query_1	FALSE	1	1595	56	5	0.0892857	0.0031348	GO:0009890	GO:BP	negative regulation of biosynthetic process	21100	4210	c("GO:0009058", "GO:0009889", "GO:0009892")
query_1	FALSE	1	226	56	4	0.0714286	0.0176991	GO:0009743	GO:BP	response to carbohydrate	21100	4091	c("GO:0010033", "GO:1901700")
query_1	FALSE	1	839	56	6	0.107143	0.00715137	GO:0009725	GO:BP	response to hormone	21100	4073	c("GO:0009719", "GO:0010033")
query_1	FALSE	1	1557	56	6	0.107143	0.00385356	GO:0009719	GO:BP	response to endogenous stimulus	21100	4067	GO:0050896
query_1	FALSE	1	166	56	1	0.0178571	0.0060241	GO:0009267	GO:BP	cellular response to starvation	21100	3864	c("GO:0031669", "GO:0033554", "GO:0042594")
query_1	FALSE	1	339	56	2	0.0357143	0.00589971	GO:0009306	GO:BP	protein secretion	21100	3886	c("GO:0015031", "GO:0032940", "GO:0035592")
query_1	FALSE	1	141	56	1	0.0178571	0.0070922	GO:0009308	GO:BP	amine metabolic process	21100	3888	GO:1901564
query_1	FALSE	1	442	56	5	0.0892857	0.0113122	GO:0009314	GO:BP	response to radiation	21100	3894	GO:0009628
query_1	FALSE	1	107	56	3	0.0535714	0.0280374	GO:0009408	GO:BP	response to heat	21100	3913	c("GO:0006950", "GO:0009266")
query_1	FALSE	1	408	56	3	0.0535714	0.00735294	GO:0009410	GO:BP	response to xenobiotic stimulus	21100	3915	GO:0042221
query_1	FALSE	1	148	56	1	0.0178571	0.00675676	GO:0009411	GO:BP	response to UV	21100	3916	GO:0009416
query_1	FALSE	1	314	56	4	0.0714286	0.0127389	GO:0009416	GO:BP	response to light stimulus	21100	3921	GO:0009314
query_1	FALSE	1	2788	56	10	0.178571	0.0035868	GO:0009605	GO:BP	response to external stimulus	21100	3977	GO:0050896
query_1	FALSE	1	1549	56	4	0.0714286	0.00258231	GO:0009607	GO:BP	response to biotic stimulus	21100	3979	GO:0050896
query_1	FALSE	1	558	56	2	0.0357143	0.00358423	GO:0009611	GO:BP	response to wounding	21100	3983	GO:0006950
query_1	FALSE	1	208	56	2	0.0357143	0.00961538	GO:0009612	GO:BP	response to mechanical stimulus	21100	3984	c("GO:0009605", "GO:0009628")
query_1	FALSE	1	748	56	3	0.0535714	0.0040107	GO:0009617	GO:BP	response to bacterium	21100	3988	GO:0051707
query_1	FALSE	1	1130	56	7	0.125	0.00619469	GO:0009628	GO:BP	response to abiotic stimulus	21100	3996	GO:0050896
query_1	FALSE	1	2702	56	8	0.142857	0.00296077	GO:0009653	GO:BP	anatomical structure morphogenesis	21100	4021	c("GO:0032502", "GO:0048856")
query_1	FALSE	1	295	56	2	0.0357143	0.00677966	GO:0009914	GO:BP	hormone transport	21100	4230	c("GO:0006810", "GO:0010817")
query_1	FALSE	1	579	56	7	0.125	0.0120898	GO:0010942	GO:BP	positive regulation of cell death	21100	5063	c("GO:0008219", "GO:0010941", "GO:0048522")
query_1	FALSE	1	305	56	2	0.0357143	0.00655738	GO:0010948	GO:BP	negative regulation of cell cycle process	21100	5067	c("GO:0010564", "GO:0022402", "GO:0045786")
query_1	FALSE	1	171	56	1	0.0178571	0.00584795	GO:0010950	GO:BP	positive regulation of endopeptidase activity	21100	5069	c("GO:0010952", "GO:0052548")
query_1	FALSE	1	23	56	1	0.0178571	0.0434783	GO:0021846	GO:BP	cell proliferation in forebrain	21100	7383	c("GO:0030900", "GO:0061351")
query_1	FALSE	1	3	56	1	0.0178571	0.333333	GO:0021849	GO:BP	neuroblast division in subventricular zone	21100	7386	c("GO:0021846", "GO:0055057")
query_1	FALSE	1	1642	56	2	0.0357143	0.00121803	GO:0022008	GO:BP	neurogenesis	21100	7544	c("GO:0007399", "GO:0030154")
query_1	FALSE	1	1206	56	4	0.0714286	0.00331675	GO:0022402	GO:BP	cell cycle process	21100	7577	c("GO:0007049", "GO:0009987")
query_1	FALSE	1	444	56	1	0.0178571	0.00225225	GO:0022407	GO:BP	regulation of cell-cell adhesion	21100	7582	c("GO:0030155", "GO:0098609")
query_1	FALSE	1	288	56	1	0.0178571	0.00347222	GO:0022409	GO:BP	positive regulation of cell-cell adhesion	21100	7584	c("GO:0022407", "GO:0045785", "GO:0098609")
query_1	FALSE	1	19	56	1	0.0178571	0.0526316	GO:0021756	GO:BP	striatum development	21100	7294	c("GO:0021544", "GO:0048856")
query_1	FALSE	1	471	56	3	0.0535714	0.00636943	GO:0022411	GO:BP	cellular component disassembly	21100	7586	GO:0016043
query_1	FALSE	1	1519	56	2	0.0357143	0.00131666	GO:0022414	GO:BP	reproductive process	21100	7589	c("GO:0000003", "GO:0008150")
query_1	FALSE	1	930	56	2	0.0357143	0.00215054	GO:0022603	GO:BP	regulation of anatomical structure morphogenesis	21100	7595	c("GO:0009653", "GO:0050793")
query_1	FALSE	1	4587	56	4	0.0714286	0.00087203	GO:0022607	GO:BP	cellular component assembly	21100	7599	c("GO:0016043", "GO:0044085")
query_1	FALSE	1	262	56	2	0.0357143	0.00763359	GO:0022898	GO:BP	regulation of transmembrane transporter activity	21100	7614	c("GO:0032409", "GO:0034762")
query_1	FALSE	1	3351	56	18	0.321429	0.00537153	GO:0023051	GO:BP	regulation of signaling	21100	7647	c("GO:0023052", "GO:0050789")
query_1	FALSE	1	1715	56	10	0.178571	0.0058309	GO:0023056	GO:BP	positive regulation of signaling	21100	7652	c("GO:0023051", "GO:0023052", "GO:0048518")
query_1	FALSE	1	409	56	2	0.0357143	0.00488998	GO:0022412	GO:BP	cellular process involved in reproduction in multicellular organism	21100	7587	c("GO:0009987", "GO:0022414", "GO:0032504")
query_1	FALSE	1	1356	56	6	0.107143	0.00442478	GO:0023057	GO:BP	negative regulation of signaling	21100	7653	c("GO:0023051", "GO:0023052", "GO:0048519")
query_1	FALSE	1	12	56	1	0.0178571	0.0833333	GO:0021670	GO:BP	lateral ventricle development	21100	7210	c("GO:0021537", "GO:0021591", "GO:0048856")
query_1	FALSE	1	25	56	1	0.0178571	0.04	GO:0021544	GO:BP	subpallium development	21100	7085	c("GO:0021537", "GO:0048856")
query_1	FALSE	1	7313	56	29	0.517857	0.00396554	GO:0019222	GO:BP	regulation of metabolic process	21100	6474	c("GO:0008152", "GO:0050789")
query_1	FALSE	1	237	56	1	0.0178571	0.00421941	GO:0019318	GO:BP	hexose metabolic process	21100	6559	GO:0005996
query_1	FALSE	1	108	56	1	0.0178571	0.00925926	GO:0019395	GO:BP	fatty acid oxidation	21100	6634	c("GO:0006631", "GO:0034440")
query_1	FALSE	1	4068	56	18	0.321429	0.00442478	GO:0019438	GO:BP	aromatic compound biosynthetic process	21100	6674	c("GO:0006725", "GO:0044249")
query_1	FALSE	1	502	56	1	0.0178571	0.00199203	GO:0019439	GO:BP	aromatic compound catabolic process	21100	6675	c("GO:0006725", "GO:0044248")
query_1	FALSE	1	5487	56	20	0.357143	0.00364498	GO:0019538	GO:BP	protein metabolic process	21100	6769	c("GO:0043170", "GO:0044238", "GO:1901564")
query_1	FALSE	1	30	56	2	0.0357143	0.0666667	GO:0021591	GO:BP	ventricular system development	21100	7132	c("GO:0007420", "GO:0048731")
query_1	FALSE	1	943	56	1	0.0178571	0.00106045	GO:0019637	GO:BP	organophosphate metabolic process	21100	6862	c("GO:0006793", "GO:0071704")
query_1	FALSE	1	59	56	1	0.0178571	0.0169492	GO:0019748	GO:BP	secondary metabolic process	21100	6950	GO:0008152
query_1	FALSE	1	940	56	4	0.0714286	0.00425532	GO:0019752	GO:BP	carboxylic acid metabolic process	21100	6954	GO:0043436
query_1	FALSE	1	9	56	1	0.0178571	0.111111	GO:0019852	GO:BP	L-ascorbic acid metabolic process	21100	6979	c("GO:0005996", "GO:0006767", "GO:0019752", "GO:1901334")
query_1	FALSE	1	686	56	7	0.125	0.0102041	GO:0019941	GO:BP	modification-dependent protein catabolic process	21100	7026	c("GO:0043632", "GO:0051603")
query_1	FALSE	1	874	56	2	0.0357143	0.00228833	GO:0019953	GO:BP	sexual reproduction	21100	7029	GO:0000003
query_1	FALSE	1	252	56	2	0.0357143	0.00793651	GO:0021537	GO:BP	telencephalon development	21100	7078	c("GO:0030900", "GO:0048856")
query_1	FALSE	1	751	56	8	0.142857	0.0106525	GO:0019725	GO:BP	cellular homeostasis	21100	6935	c("GO:0009987", "GO:0042592")
query_1	FALSE	1	459	56	2	0.0357143	0.0043573	GO:0023061	GO:BP	signal release	21100	7657	c("GO:0007267", "GO:0032940")
query_1	FALSE	1	886	56	3	0.0535714	0.003386	GO:0030001	GO:BP	metal ion transport	21100	7665	GO:0006812
query_1	FALSE	1	491	56	3	0.0535714	0.00610998	GO:0030003	GO:BP	cellular cation homeostasis	21100	7667	c("GO:0006873", "GO:0055080")
query_1	FALSE	1	216	56	1	0.0178571	0.00462963	GO:0030258	GO:BP	lipid modification	21100	7778	GO:0044255
query_1	FALSE	1	119	56	1	0.0178571	0.00840336	GO:0030278	GO:BP	regulation of ossification	21100	7786	c("GO:0001503", "GO:0051239")
query_1	FALSE	1	120	56	1	0.0178571	0.00833333	GO:0030282	GO:BP	bone mineralization	21100	7788	c("GO:0001503", "GO:0031214")
query_1	FALSE	1	189	56	2	0.0357143	0.010582	GO:0030308	GO:BP	negative regulation of cell growth	21100	7794	c("GO:0001558", "GO:0016049", "GO:0045926", "GO:0048523")
query_1	FALSE	1	184	56	3	0.0535714	0.0163043	GO:0030323	GO:BP	respiratory tube development	21100	7805	c("GO:0035295", "GO:0048513")
query_1	FALSE	1	180	56	2	0.0357143	0.0111111	GO:0030324	GO:BP	lung development	21100	7806	c("GO:0030323", "GO:0048513", "GO:0060541")
query_1	FALSE	1	267	56	1	0.0178571	0.00374532	GO:0030217	GO:BP	T cell differentiation	21100	7756	c("GO:0030098", "GO:0042110")
query_1	FALSE	1	893	56	5	0.0892857	0.0055991	GO:0030334	GO:BP	regulation of cell migration	21100	7813	c("GO:0016477", "GO:2000145")
query_1	FALSE	1	265	56	2	0.0357143	0.00754717	GO:0030336	GO:BP	negative regulation of cell migration	21100	7815	c("GO:0016477", "GO:0030334", "GO:2000146")
query_1	FALSE	1	88	56	1	0.0178571	0.0113636	GO:0030433	GO:BP	ubiquitin-dependent ERAD pathway	21100	7837	c("GO:0036503", "GO:0043161")
query_1	FALSE	1	78	56	1	0.0178571	0.0128205	GO:0030500	GO:BP	regulation of bone mineralization	21100	7876	c("GO:0030278", "GO:0030282", "GO:0070167")
query_1	FALSE	1	116	56	1	0.0178571	0.00862069	GO:0030518	GO:BP	intracellular steroid hormone receptor signaling pathway	21100	7888	c("GO:0030522", "GO:0043401")
query_1	FALSE	1	55	56	1	0.0178571	0.0181818	GO:0030520	GO:BP	intracellular estrogen receptor signaling pathway	21100	7889	GO:0030518
query_1	FALSE	1	264	56	2	0.0357143	0.00757576	GO:0030522	GO:BP	intracellular receptor signaling pathway	21100	7891	GO:0007165
query_1	FALSE	1	523	56	2	0.0357143	0.00382409	GO:0030335	GO:BP	positive regulation of cell migration	21100	7814	c("GO:0016477", "GO:0030334", "GO:2000147")
query_1	FALSE	1	132	56	1	0.0178571	0.00757576	GO:0030203	GO:BP	glycosaminoglycan metabolic process	21100	7743	GO:0006022
query_1	FALSE	1	1366	56	2	0.0357143	0.00146413	GO:0030182	GO:BP	neuron differentiation	21100	7730	c("GO:0030154", "GO:0048699")
query_1	FALSE	1	190	56	1	0.0178571	0.00526316	GO:0030178	GO:BP	negative regulation of Wnt signaling pathway	21100	7727	c("GO:0009968", "GO:0016055", "GO:0030111")
query_1	FALSE	1	107	56	1	0.0178571	0.00934579	GO:0030004	GO:BP	cellular monovalent inorganic cation homeostasis	21100	7668	c("GO:0030003", "GO:0055067")
query_1	FALSE	1	804	56	1	0.0178571	0.00124378	GO:0030029	GO:BP	actin filament-based process	21100	7675	GO:0009987
query_1	FALSE	1	1525	56	2	0.0357143	0.00131148	GO:0030030	GO:BP	cell projection organization	21100	7676	GO:0016043
query_1	FALSE	1	715	56	1	0.0178571	0.0013986	GO:0030036	GO:BP	actin cytoskeleton organization	21100	7682	c("GO:0007010", "GO:0030029")
query_1	FALSE	1	224	56	2	0.0357143	0.00892857	GO:0030072	GO:BP	peptide hormone secretion	21100	7696	c("GO:0002790", "GO:0046879")
query_1	FALSE	1	181	56	2	0.0357143	0.0110497	GO:0030073	GO:BP	insulin secretion	21100	7697	c("GO:0009306", "GO:0030072")
query_1	FALSE	1	899	56	3	0.0535714	0.00333704	GO:0030097	GO:BP	hemopoiesis	21100	7700	GO:0048534
query_1	FALSE	1	391	56	1	0.0178571	0.00255754	GO:0030098	GO:BP	lymphocyte differentiation	21100	7701	c("GO:0046649", "GO:1903131")
query_1	FALSE	1	346	56	3	0.0535714	0.00867052	GO:0030111	GO:BP	regulation of Wnt signaling pathway	21100	7708	c("GO:0009966", "GO:0016055")
query_1	FALSE	1	4160	56	15	0.267857	0.00360577	GO:0030154	GO:BP	cell differentiation	21100	7716	GO:0048869
query_1	FALSE	1	740	56	1	0.0178571	0.00135135	GO:0030155	GO:BP	regulation of cell adhesion	21100	7717	c("GO:0007155", "GO:0050794")
query_1	FALSE	1	731	56	4	0.0714286	0.00547196	GO:0030162	GO:BP	regulation of proteolysis	21100	7719	c("GO:0006508", "GO:0051246")
query_1	FALSE	1	996	56	7	0.125	0.00702811	GO:0030163	GO:BP	protein catabolic process	21100	7720	c("GO:0009057", "GO:0019538", "GO:1901565")
query_1	FALSE	1	132	56	1	0.0178571	0.00757576	GO:0030168	GO:BP	platelet activation	21100	7724	c("GO:0001775", "GO:0007596")
query_1	FALSE	1	160	56	2	0.0357143	0.0125	GO:0030177	GO:BP	positive regulation of Wnt signaling pathway	21100	7726	c("GO:0009967", "GO:0016055", "GO:0030111")
query_1	FALSE	1	500	56	2	0.0357143	0.004	GO:0019221	GO:BP	cytokine-mediated signaling pathway	21100	6473	c("GO:0007166", "GO:0071345")
query_1	FALSE	1	1386	56	3	0.0535714	0.0021645	GO:0019220	GO:BP	regulation of phosphate metabolic process	21100	6472	c("GO:0006796", "GO:0051174")
query_1	FALSE	1	4048	56	16	0.285714	0.00395257	GO:0019219	GO:BP	regulation of nucleobase-containing compound metabolic process	21100	6471	c("GO:0006139", "GO:0031323", "GO:0051171", "GO:0080090")
query_1	FALSE	1	87	56	1	0.0178571	0.0114943	GO:0019217	GO:BP	regulation of fatty acid metabolic process	21100	6469	c("GO:0006631", "GO:0010565", "GO:0019216")
query_1	FALSE	1	4	56	1	0.0178571	0.25	GO:0015787	GO:BP	UDP-glucuronic acid transmembrane transport	21100	5455	c("GO:0046942", "GO:0090481", "GO:0098656")
query_1	FALSE	1	4	56	1	0.0178571	0.25	GO:0015789	GO:BP	UDP-N-acetylgalactosamine transmembrane transport	21100	5456	c("GO:0015711", "GO:0090481", "GO:0098656")
query_1	FALSE	1	63	56	1	0.0178571	0.015873	GO:0015800	GO:BP	acidic amino acid transport	21100	5467	GO:0006865
query_1	FALSE	1	68	56	1	0.0178571	0.0147059	GO:0015807	GO:BP	L-amino acid transport	21100	5474	c("GO:0046942", "GO:0071705")
query_1	FALSE	1	29	56	1	0.0178571	0.0344828	GO:0015813	GO:BP	L-glutamate transmembrane transport	21100	5479	c("GO:0051938", "GO:0098656", "GO:1902475")
query_1	FALSE	1	254	56	3	0.0535714	0.011811	GO:0015833	GO:BP	peptide transport	21100	5497	c("GO:0042886", "GO:0071702")
query_1	FALSE	1	14	56	1	0.0178571	0.0714286	GO:0015780	GO:BP	nucleotide-sugar transmembrane transport	21100	5451	c("GO:0015931", "GO:0055085", "GO:1901264")
query_1	FALSE	1	323	56	2	0.0357143	0.00619195	GO:0015849	GO:BP	organic acid transport	21100	5512	GO:0071702
query_1	FALSE	1	102	56	1	0.0178571	0.00980392	GO:0015908	GO:BP	fatty acid transport	21100	5565	c("GO:0006869", "GO:0015849")
query_1	FALSE	1	67	56	1	0.0178571	0.0149254	GO:0015909	GO:BP	long-chain fatty acid transport	21100	5566	GO:0015908
query_1	FALSE	1	10	56	1	0.0178571	0.1	GO:0015911	GO:BP	long-chain fatty acid import across plasma membrane	21100	5568	c("GO:0044539", "GO:0098739", "GO:1902001")
query_1	FALSE	1	226	56	2	0.0357143	0.00884956	GO:0015931	GO:BP	nucleobase-containing compound transport	21100	5578	c("GO:0071702", "GO:0071705")
query_1	FALSE	1	328	56	2	0.0357143	0.00609756	GO:0015980	GO:BP	energy derivation by oxidation of organic compounds	21100	5622	GO:0006091
query_1	FALSE	1	336	56	2	0.0357143	0.00595238	GO:0016042	GO:BP	lipid catabolic process	21100	5644	c("GO:0006629", "GO:1901575")
query_1	FALSE	1	11	56	1	0.0178571	0.0909091	GO:0015886	GO:BP	heme transport	21100	5547	c("GO:0071702", "GO:0071705", "GO:1901678")
query_1	FALSE	1	116	56	1	0.0178571	0.00862069	GO:0015749	GO:BP	monosaccharide transmembrane transport	21100	5421	GO:0034219
query_1	FALSE	1	363	56	2	0.0357143	0.00550964	GO:0015711	GO:BP	organic anion transport	21100	5384	c("GO:0006820", "GO:0071702")
query_1	FALSE	1	1778	56	7	0.125	0.00393701	GO:0015031	GO:BP	protein transport	21100	5347	c("GO:0045184", "GO:0071702", "GO:0071705")
query_1	FALSE	1	240	56	1	0.0178571	0.00416667	GO:0010951	GO:BP	negative regulation of endopeptidase activity	21100	5070	c("GO:0010466", "GO:0052548")
query_1	FALSE	1	189	56	1	0.0178571	0.00529101	GO:0010952	GO:BP	positive regulation of peptidase activity	21100	5071	c("GO:0045862", "GO:0051345", "GO:0052547")
query_1	FALSE	1	392	56	1	0.0178571	0.00255102	GO:0010959	GO:BP	regulation of metal ion transport	21100	5077	c("GO:0030001", "GO:0043269")
query_1	FALSE	1	29	56	1	0.0178571	0.0344828	GO:0010962	GO:BP	regulation of glucan biosynthetic process	21100	5080	c("GO:0009250", "GO:0010675", "GO:0032885", "GO:2000112")
query_1	FALSE	1	81	56	1	0.0178571	0.0123457	GO:0010972	GO:BP	negative regulation of G2/M transition of mitotic cell cycle	21100	5089	c("GO:0000086", "GO:0010389", "GO:1901991", "GO:1902750")
query_1	FALSE	1	431	56	1	0.0178571	0.00232019	GO:0010975	GO:BP	regulation of neuron projection development	21100	5092	c("GO:0031175", "GO:0120035")
query_1	FALSE	1	135	56	1	0.0178571	0.00740741	GO:0010977	GO:BP	negative regulation of neuron projection development	21100	5094	c("GO:0010975", "GO:0031175", "GO:0031345")
query_1	FALSE	1	95	56	1	0.0178571	0.0105263	GO:0014033	GO:BP	neural crest cell differentiation	21100	5147	c("GO:0048762", "GO:0048863")
query_1	FALSE	1	901	56	6	0.107143	0.00665927	GO:0014070	GO:BP	response to organic cyclic compound	21100	5183	GO:0010033
query_1	FALSE	1	230	56	1	0.0178571	0.00434783	GO:0014706	GO:BP	striated muscle tissue development	21100	5191	GO:0060537
query_1	FALSE	1	4	56	1	0.0178571	0.25	GO:0014805	GO:BP	smooth muscle adaptation	21100	5233	GO:0043500
query_1	FALSE	1	2	56	1	0.0178571	0.5	GO:0014806	GO:BP	smooth muscle hyperplasia	21100	5234	c("GO:0014805", "GO:0014900")
query_1	FALSE	1	67	56	2	0.0357143	0.0298507	GO:0014823	GO:BP	response to activity	21100	5251	GO:0050896
query_1	FALSE	1	61	56	1	0.0178571	0.0163934	GO:0014855	GO:BP	striated muscle cell proliferation	21100	5281	GO:0033002
query_1	FALSE	1	3	56	1	0.0178571	0.333333	GO:0014900	GO:BP	muscle hyperplasia	21100	5324	GO:0043500
query_1	FALSE	1	7868	56	20	0.357143	0.00254194	GO:0016043	GO:BP	cellular component organization	21100	5645	GO:0071840
query_1	FALSE	1	119	56	1	0.0178571	0.00840336	GO:0007613	GO:BP	memory	21100	3473	GO:0007611
query_1	FALSE	1	490	56	2	0.0357143	0.00408163	GO:0016049	GO:BP	cell growth	21100	5649	c("GO:0009987", "GO:0040007")
query_1	FALSE	1	204	56	1	0.0178571	0.00490196	GO:0016051	GO:BP	carbohydrate biosynthetic process	21100	5651	c("GO:0005975", "GO:1901576")
query_1	FALSE	1	208	56	1	0.0178571	0.00480769	GO:0017157	GO:BP	regulation of exocytosis	21100	5893	c("GO:0006887", "GO:0060627", "GO:1903530")
query_1	FALSE	1	147	56	1	0.0178571	0.00680272	GO:0018022	GO:BP	peptidyl-lysine methylation	21100	5933	c("GO:0006479", "GO:0018205")
query_1	FALSE	1	313	56	2	0.0357143	0.00638978	GO:0018105	GO:BP	peptidyl-serine phosphorylation	21100	5998	c("GO:0006468", "GO:0018209")
query_1	FALSE	1	114	56	2	0.0357143	0.0175439	GO:0018107	GO:BP	peptidyl-threonine phosphorylation	21100	6000	c("GO:0006468", "GO:0018210")
query_1	FALSE	1	4057	56	17	0.303571	0.00419029	GO:0018130	GO:BP	heterocycle biosynthetic process	21100	6014	c("GO:0044249", "GO:0046483")
query_1	FALSE	1	16	56	1	0.0178571	0.0625	GO:0018146	GO:BP	keratan sulfate biosynthetic process	21100	6028	c("GO:0006024", "GO:0042339", "GO:0044272")
query_1	FALSE	1	185	56	1	0.0178571	0.00540541	GO:0016579	GO:BP	protein deubiquitination	21100	5855	GO:0070646
query_1	FALSE	1	1285	56	4	0.0714286	0.00311284	GO:0018193	GO:BP	peptidyl-amino acid modification	21100	6073	GO:0006464
query_1	FALSE	1	336	56	2	0.0357143	0.00595238	GO:0018209	GO:BP	peptidyl-serine modification	21100	6089	GO:0018193
query_1	FALSE	1	123	56	2	0.0357143	0.0162602	GO:0018210	GO:BP	peptidyl-threonine modification	21100	6090	GO:0018193
query_1	FALSE	1	177	56	1	0.0178571	0.00564972	GO:0018393	GO:BP	internal peptidyl-lysine acetylation	21100	6243	c("GO:0006475", "GO:0018394")
query_1	FALSE	1	188	56	1	0.0178571	0.00531915	GO:0018394	GO:BP	peptidyl-lysine acetylation	21100	6244	c("GO:0006473", "GO:0018205")
query_1	FALSE	1	113	56	1	0.0178571	0.00884956	GO:0018958	GO:BP	phenol-containing compound metabolic process	21100	6370	c("GO:0006725", "GO:1901360", "GO:1901615")
query_1	FALSE	1	331	56	1	0.0178571	0.00302115	GO:0019216	GO:BP	regulation of lipid metabolic process	21100	6468	c("GO:0006629", "GO:0080090")
query_1	FALSE	1	403	56	2	0.0357143	0.00496278	GO:0018205	GO:BP	peptidyl-lysine modification	21100	6085	GO:0018193
query_1	FALSE	1	172	56	1	0.0178571	0.00581395	GO:0016573	GO:BP	histone acetylation	21100	5849	c("GO:0016570", "GO:0018393")
query_1	FALSE	1	163	56	1	0.0178571	0.00613497	GO:0016571	GO:BP	histone methylation	21100	5847	c("GO:0006479", "GO:0016570")
query_1	FALSE	1	505	56	2	0.0357143	0.0039604	GO:0016570	GO:BP	histone modification	21100	5846	GO:0006464
query_1	FALSE	1	243	56	1	0.0178571	0.00411523	GO:0016054	GO:BP	organic acid catabolic process	21100	5654	c("GO:0006082", "GO:0044248", "GO:0044282", "GO:1901575")
query_1	FALSE	1	470	56	5	0.0892857	0.0106383	GO:0016055	GO:BP	Wnt signaling pathway	21100	5655	c("GO:0198738", "GO:1905114")
query_1	FALSE	1	6983	56	19	0.339286	0.00272089	GO:0016070	GO:BP	RNA metabolic process	21100	5667	GO:0090304
query_1	FALSE	1	2179	56	2	0.0357143	0.000917852	GO:0016071	GO:BP	mRNA metabolic process	21100	5668	GO:0016070
query_1	FALSE	1	1604	56	4	0.0714286	0.00249377	GO:0016192	GO:BP	vesicle-mediated transport	21100	5742	GO:0006810
query_1	FALSE	1	232	56	2	0.0357143	0.00862069	GO:0016197	GO:BP	endosomal transport	21100	5743	c("GO:0016192", "GO:0046907")
query_1	FALSE	1	40	56	1	0.0178571	0.025	GO:0016233	GO:BP	telomere capping	21100	5752	GO:0000723
query_1	FALSE	1	308	56	5	0.0892857	0.0162338	GO:0016236	GO:BP	macroautophagy	21100	5753	GO:0006914
query_1	FALSE	1	9	56	1	0.0178571	0.111111	GO:0016237	GO:BP	lysosomal microautophagy	21100	5754	GO:0006914
query_1	FALSE	1	73	56	2	0.0357143	0.0273973	GO:0016239	GO:BP	positive regulation of macroautophagy	21100	5755	c("GO:0010508", "GO:0016236", "GO:0016241")
query_1	FALSE	1	157	56	2	0.0357143	0.0127389	GO:0016241	GO:BP	regulation of macroautophagy	21100	5757	c("GO:0010506", "GO:0016236")
query_1	FALSE	1	34	56	1	0.0178571	0.0294118	GO:0016242	GO:BP	negative regulation of macroautophagy	21100	5758	c("GO:0010507", "GO:0016236", "GO:0016241")
query_1	FALSE	1	1882	56	7	0.125	0.00371945	GO:0016310	GO:BP	phosphorylation	21100	5776	GO:0006796
query_1	FALSE	1	640	56	1	0.0178571	0.0015625	GO:0016441	GO:BP	post-transcriptional gene silencing	21100	5807	c("GO:0010608", "GO:0010629")
query_1	FALSE	1	1461	56	6	0.107143	0.00410678	GO:0016477	GO:BP	cell migration	21100	5816	GO:0048870
query_1	FALSE	1	304	56	1	0.0178571	0.00328947	GO:0016050	GO:BP	vesicle organization	21100	5650	GO:0006996
query_1	FALSE	1	139	56	2	0.0357143	0.0143885	GO:0030534	GO:BP	adult behavior	21100	7892	GO:0007610
query_1	FALSE	1	148	56	1	0.0178571	0.00675676	GO:0007612	GO:BP	learning	21100	3472	GO:0007611
query_1	FALSE	1	611	56	3	0.0535714	0.00490998	GO:0007610	GO:BP	behavior	21100	3470	GO:0032501
query_1	FALSE	1	2781	56	10	0.178571	0.00359583	GO:0002376	GO:BP	immune system process	21100	1029	GO:0008150
query_1	FALSE	1	196	56	1	0.0178571	0.00510204	GO:0002440	GO:BP	production of molecular mediator of immune response	21100	1086	c("GO:0002376", "GO:0010467")
query_1	FALSE	1	438	56	1	0.0178571	0.00228311	GO:0002443	GO:BP	leukocyte mediated immunity	21100	1089	GO:0002252
query_1	FALSE	1	105	56	1	0.0178571	0.00952381	GO:0002444	GO:BP	myeloid leukocyte mediated immunity	21100	1090	GO:0002443
query_1	FALSE	1	51	56	1	0.0178571	0.0196078	GO:0002448	GO:BP	mast cell mediated immunity	21100	1094	GO:0002444
query_1	FALSE	1	996	56	3	0.0535714	0.00301205	GO:0002520	GO:BP	immune system development	21100	1165	c("GO:0002376", "GO:0048731")
query_1	FALSE	1	97	56	1	0.0178571	0.0103093	GO:0002367	GO:BP	cytokine production involved in immune response	21100	1022	c("GO:0001816", "GO:0002440", "GO:0006955")
query_1	FALSE	1	563	56	1	0.0178571	0.0017762	GO:0002521	GO:BP	leukocyte differentiation	21100	1166	c("GO:0030097", "GO:0030154")
query_1	FALSE	1	419	56	1	0.0178571	0.00238663	GO:0002683	GO:BP	negative regulation of immune system process	21100	1324	c("GO:0002376", "GO:0002682", "GO:0048519")
query_1	FALSE	1	936	56	4	0.0714286	0.0042735	GO:0002684	GO:BP	positive regulation of immune system process	21100	1325	c("GO:0002376", "GO:0002682", "GO:0048518")
query_1	FALSE	1	217	56	1	0.0178571	0.00460829	GO:0002685	GO:BP	regulation of leukocyte migration	21100	1326	c("GO:0002682", "GO:0030334", "GO:0050900")
query_1	FALSE	1	46	56	1	0.0178571	0.0217391	GO:0002686	GO:BP	negative regulation of leukocyte migration	21100	1327	c("GO:0002683", "GO:0002685", "GO:0030336", "GO:0050900")
query_1	FALSE	1	620	56	5	0.0892857	0.00806452	GO:0002694	GO:BP	regulation of leukocyte activation	21100	1335	c("GO:0002682", "GO:0045321", "GO:0050865")
query_1	FALSE	1	189	56	1	0.0178571	0.00529101	GO:0002695	GO:BP	negative regulation of leukocyte activation	21100	1336	c("GO:0002683", "GO:0002694", "GO:0045321", "GO:0050866")
query_1	FALSE	1	1442	56	6	0.107143	0.00416089	GO:0002682	GO:BP	regulation of immune system process	21100	1323	c("GO:0002376", "GO:0050789")
query_1	FALSE	1	415	56	3	0.0535714	0.00722892	GO:0002696	GO:BP	positive regulation of leukocyte activation	21100	1337	c("GO:0002684", "GO:0002694", "GO:0045321", "GO:0050867")
query_1	FALSE	1	285	56	2	0.0357143	0.00701754	GO:0002366	GO:BP	leukocyte activation involved in immune response	21100	1021	c("GO:0002263", "GO:0045321")
query_1	FALSE	1	67	56	1	0.0178571	0.0149254	GO:0002293	GO:BP	alpha-beta T cell differentiation involved in immune response	21100	948	c("GO:0002287", "GO:0002292", "GO:0046632")
query_1	FALSE	1	342	56	2	0.0357143	0.00584795	GO:0002237	GO:BP	response to molecule of bacterial origin	21100	893	c("GO:0009617", "GO:0010033", "GO:0043207")
query_1	FALSE	1	150	56	1	0.0178571	0.00666667	GO:0002244	GO:BP	hematopoietic progenitor cell differentiation	21100	900	c("GO:0030097", "GO:0030154")
query_1	FALSE	1	8	56	1	0.0178571	0.125	GO:0002246	GO:BP	wound healing involved in inflammatory response	21100	901	c("GO:0042060", "GO:0090594")
query_1	FALSE	1	661	56	2	0.0357143	0.00302572	GO:0002252	GO:BP	immune effector process	21100	907	GO:0002376
query_1	FALSE	1	67	56	1	0.0178571	0.0149254	GO:0002260	GO:BP	lymphocyte homeostasis	21100	915	GO:0001776
query_1	FALSE	1	162	56	2	0.0357143	0.0123457	GO:0002262	GO:BP	myeloid cell homeostasis	21100	917	c("GO:0002376", "GO:0048872")
query_1	FALSE	1	66	56	1	0.0178571	0.0151515	GO:0002294	GO:BP	CD4-positive, alpha-beta T cell differentiation involved in immune response	21100	949	c("GO:0002293", "GO:0043367")
query_1	FALSE	1	289	56	2	0.0357143	0.00692042	GO:0002263	GO:BP	cell activation involved in immune response	21100	918	c("GO:0001775", "GO:0002252", "GO:0006955")
query_1	FALSE	1	93	56	1	0.0178571	0.0107527	GO:0002275	GO:BP	myeloid cell activation involved in immune response	21100	930	c("GO:0002274", "GO:0002366")
query_1	FALSE	1	51	56	1	0.0178571	0.0196078	GO:0002279	GO:BP	mast cell activation involved in immune response	21100	934	c("GO:0002275", "GO:0045576")
query_1	FALSE	1	201	56	1	0.0178571	0.00497512	GO:0002285	GO:BP	lymphocyte activation involved in immune response	21100	940	c("GO:0002366", "GO:0046649")
query_1	FALSE	1	114	56	1	0.0178571	0.00877193	GO:0002286	GO:BP	T cell activation involved in immune response	21100	941	c("GO:0002285", "GO:0042110")
query_1	FALSE	1	67	56	1	0.0178571	0.0149254	GO:0002287	GO:BP	alpha-beta T cell activation involved in immune response	21100	942	c("GO:0002286", "GO:0046631")
query_1	FALSE	1	75	56	1	0.0178571	0.0133333	GO:0002292	GO:BP	T cell differentiation involved in immune response	21100	947	c("GO:0002286", "GO:0030217")
query_1	FALSE	1	229	56	3	0.0535714	0.0131004	GO:0002274	GO:BP	myeloid leukocyte activation	21100	929	GO:0045321
query_1	FALSE	1	349	56	2	0.0357143	0.00573066	GO:0002697	GO:BP	regulation of immune effector process	21100	1338	c("GO:0002252", "GO:0002682")
query_1	FALSE	1	112	56	1	0.0178571	0.00892857	GO:0002698	GO:BP	negative regulation of immune effector process	21100	1339	c("GO:0002252", "GO:0002683", "GO:0002697")
query_1	FALSE	1	241	56	2	0.0357143	0.00829876	GO:0002699	GO:BP	positive regulation of immune effector process	21100	1340	c("GO:0002252", "GO:0002684", "GO:0002697")
query_1	FALSE	1	587	56	3	0.0535714	0.00511073	GO:0003013	GO:BP	circulatory system process	21100	1589	GO:0003008
query_1	FALSE	1	40	56	2	0.0357143	0.05	GO:0003016	GO:BP	respiratory system process	21100	1592	c("GO:0003008", "GO:0007585")
query_1	FALSE	1	260	56	2	0.0357143	0.00769231	GO:0003018	GO:BP	vascular process in circulatory system	21100	1594	GO:0003013
query_1	FALSE	1	43	56	2	0.0357143	0.0465116	GO:0003254	GO:BP	regulation of membrane depolarization	21100	1825	c("GO:0042391", "GO:0050794", "GO:0051899")
query_1	FALSE	1	10	56	1	0.0178571	0.1	GO:0003263	GO:BP	cardioblast proliferation	21100	1834	c("GO:0060914", "GO:0061323")
query_1	FALSE	1	10	56	1	0.0178571	0.1	GO:0003264	GO:BP	regulation of cardioblast proliferation	21100	1835	c("GO:0003263", "GO:2000136")
query_1	FALSE	1	421	56	1	0.0178571	0.0023753	GO:0003012	GO:BP	muscle system process	21100	1588	GO:0003008
query_1	FALSE	1	99	56	1	0.0178571	0.010101	GO:0003333	GO:BP	amino acid transmembrane transport	21100	1902	c("GO:0006865", "GO:1905039")
query_1	FALSE	1	106	56	2	0.0357143	0.0188679	GO:0005976	GO:BP	polysaccharide metabolic process	21100	2010	c("GO:0005975", "GO:0043170")
query_1	FALSE	1	72	56	2	0.0357143	0.0277778	GO:0005977	GO:BP	glycogen metabolic process	21100	2011	c("GO:0006073", "GO:0006112")
query_1	FALSE	1	45	56	1	0.0178571	0.0222222	GO:0005978	GO:BP	glycogen biosynthetic process	21100	2012	c("GO:0005977", "GO:0009250")
query_1	FALSE	1	29	56	1	0.0178571	0.0344828	GO:0005979	GO:BP	regulation of glycogen biosynthetic process	21100	2013	c("GO:0005978", "GO:0010962", "GO:0070873")
query_1	FALSE	1	258	56	2	0.0357143	0.00775194	GO:0005996	GO:BP	monosaccharide metabolic process	21100	2030	c("GO:0005975", "GO:0044281")
query_1	FALSE	1	194	56	1	0.0178571	0.00515464	GO:0006006	GO:BP	glucose metabolic process	21100	2040	GO:0019318
query_1	FALSE	1	590	56	3	0.0535714	0.00508475	GO:0005975	GO:BP	carbohydrate metabolic process	21100	2009	c("GO:0044238", "GO:0071704")
query_1	FALSE	1	2235	56	7	0.125	0.00313199	GO:0003008	GO:BP	system process	21100	1584	GO:0032501
query_1	FALSE	1	252	56	1	0.0178571	0.00396825	GO:0003007	GO:BP	heart morphogenesis	21100	1583	c("GO:0007507", "GO:0009887")
query_1	FALSE	1	1013	56	2	0.0357143	0.00197433	GO:0003006	GO:BP	developmental process involved in reproduction	21100	1582	c("GO:0022414", "GO:0032502")
query_1	FALSE	1	167	56	1	0.0178571	0.00598802	GO:0002700	GO:BP	regulation of production of molecular mediator of immune response	21100	1341	c("GO:0002440", "GO:0002697", "GO:0010468")
query_1	FALSE	1	37	56	1	0.0178571	0.027027	GO:0002701	GO:BP	negative regulation of production of molecular mediator of immune response	21100	1342	c("GO:0002440", "GO:0002698", "GO:0002700", "GO:0010629")
query_1	FALSE	1	229	56	1	0.0178571	0.00436681	GO:0002703	GO:BP	regulation of leukocyte mediated immunity	21100	1344	c("GO:0002443", "GO:0002697")
query_1	FALSE	1	64	56	1	0.0178571	0.015625	GO:0002704	GO:BP	negative regulation of leukocyte mediated immunity	21100	1345	c("GO:0002443", "GO:0002698", "GO:0002703")
query_1	FALSE	1	97	56	1	0.0178571	0.0103093	GO:0002718	GO:BP	regulation of cytokine production involved in immune response	21100	1359	c("GO:0001817", "GO:0002367", "GO:0002700")
query_1	FALSE	1	25	56	1	0.0178571	0.04	GO:0002719	GO:BP	negative regulation of cytokine production involved in immune response	21100	1360	c("GO:0001818", "GO:0002367", "GO:0002701", "GO:0002718")
query_1	FALSE	1	497	56	1	0.0178571	0.00201207	GO:0002764	GO:BP	immune response-regulating signaling pathway	21100	1399	c("GO:0007165", "GO:0050776")
query_1	FALSE	1	229	56	2	0.0357143	0.00873362	GO:0002790	GO:BP	peptide secretion	21100	1425	c("GO:0015833", "GO:0046903")
query_1	FALSE	1	183	56	1	0.0178571	0.00546448	GO:0002791	GO:BP	regulation of peptide secretion	21100	1426	c("GO:0002790", "GO:0051046", "GO:0090087")
query_1	FALSE	1	94	56	1	0.0178571	0.0106383	GO:0002793	GO:BP	positive regulation of peptide secretion	21100	1428	c("GO:0002790", "GO:0002791", "GO:0051047")
query_1	FALSE	1	57	56	1	0.0178571	0.0175439	GO:0002886	GO:BP	regulation of myeloid leukocyte mediated immunity	21100	1520	c("GO:0002444", "GO:0002703")
query_1	FALSE	1	11	56	1	0.0178571	0.0909091	GO:0002887	GO:BP	negative regulation of myeloid leukocyte mediated immunity	21100	1521	c("GO:0002444", "GO:0002704", "GO:0002886")
query_1	FALSE	1	19	56	1	0.0178571	0.0526316	GO:0002902	GO:BP	regulation of B cell apoptotic process	21100	1536	c("GO:0001783", "GO:0070228")
query_1	FALSE	1	12	56	1	0.0178571	0.0833333	GO:0002903	GO:BP	negative regulation of B cell apoptotic process	21100	1537	c("GO:0001783", "GO:0002902", "GO:0070229")
query_1	FALSE	1	54	56	1	0.0178571	0.0185185	GO:0002931	GO:BP	response to ischemia	21100	1563	GO:0006950
query_1	FALSE	1	120	56	1	0.0178571	0.00833333	GO:0002224	GO:BP	toll-like receptor signaling pathway	21100	881	GO:0002221
query_1	FALSE	1	143	56	1	0.0178571	0.00699301	GO:0006022	GO:BP	aminoglycan metabolic process	21100	2054	c("GO:0043170", "GO:1901135", "GO:1901564")
query_1	FALSE	1	173	56	1	0.0178571	0.00578035	GO:0002221	GO:BP	pattern recognition receptor signaling pathway	21100	878	GO:0002764
query_1	FALSE	1	18	56	1	0.0178571	0.0555556	GO:0002076	GO:BP	osteoblast development	21100	784	c("GO:0001649", "GO:0048468")
query_1	FALSE	1	36	56	1	0.0178571	0.0277778	GO:0000423	GO:BP	mitophagy	21100	178	c("GO:0000422", "GO:0061912")
query_1	FALSE	1	148	56	1	0.0178571	0.00675676	GO:0000723	GO:BP	telomere maintenance	21100	258	c("GO:0006259", "GO:0032200")
query_1	FALSE	1	202	56	1	0.0178571	0.0049505	GO:0000819	GO:BP	sister chromatid segregation	21100	304	c("GO:0051276", "GO:0098813")
query_1	FALSE	1	7	56	1	0.0178571	0.142857	GO:0000820	GO:BP	regulation of glutamine family amino acid metabolic process	21100	305	c("GO:0006521", "GO:0009064")
query_1	FALSE	1	1012	56	2	0.0357143	0.00197628	GO:0000902	GO:BP	cell morphogenesis	21100	307	GO:0009653
query_1	FALSE	1	722	56	2	0.0357143	0.00277008	GO:0000904	GO:BP	cell morphogenesis involved in differentiation	21100	309	c("GO:0000902", "GO:0048468")
query_1	FALSE	1	88	56	2	0.0357143	0.0227273	GO:0000422	GO:BP	autophagy of mitochondrion	21100	177	c("GO:0006914", "GO:0061726")
query_1	FALSE	1	134	56	2	0.0357143	0.0149254	GO:0001101	GO:BP	response to acid chemical	21100	359	GO:0042221
query_1	FALSE	1	413	56	2	0.0357143	0.00484262	GO:0001503	GO:BP	ossification	21100	425	GO:0032501
query_1	FALSE	1	521	56	1	0.0178571	0.00191939	GO:0001525	GO:BP	angiogenesis	21100	437	c("GO:0048514", "GO:0048646")
query_1	FALSE	1	425	56	2	0.0357143	0.00470588	GO:0001558	GO:BP	regulation of cell growth	21100	457	c("GO:0016049", "GO:0040008", "GO:0051128")
query_1	FALSE	1	700	56	1	0.0178571	0.00142857	GO:0001568	GO:BP	blood vessel development	21100	464	c("GO:0001944", "GO:0048856")
query_1	FALSE	1	229	56	2	0.0357143	0.00873362	GO:0001649	GO:BP	osteoblast differentiation	21100	478	c("GO:0001503", "GO:0030154")
query_1	FALSE	1	390	56	1	0.0178571	0.0025641	GO:0001654	GO:BP	eye development	21100	479	c("GO:0007423", "GO:0150063")
query_1	FALSE	1	535	56	1	0.0178571	0.00186916	GO:0001501	GO:BP	skeletal system development	21100	423	GO:0048731
query_1	FALSE	1	178	56	2	0.0357143	0.011236	GO:0001659	GO:BP	temperature homeostasis	21100	484	GO:0048871
query_1	FALSE	1	1724	56	1	0.0178571	0.000580046	GO:0000398	GO:BP	mRNA splicing, via spliceosome	21100	168	c("GO:0000377", "GO:0006397")
query_1	FALSE	1	1728	56	1	0.0178571	0.000578704	GO:0000375	GO:BP	RNA splicing, via transesterification reactions	21100	154	GO:0008380
query_1	FALSE	1	103	56	1	0.0178571	0.00970874	GO:0000041	GO:BP	transition metal ion transport	21100	18	GO:0030001
query_1	FALSE	1	106	56	2	0.0357143	0.0188679	GO:0000045	GO:BP	autophagosome assembly	21100	20	c("GO:0070925", "GO:1905037")
query_1	FALSE	1	173	56	1	0.0178571	0.00578035	GO:0000070	GO:BP	mitotic sister chromatid segregation	21100	32	c("GO:0000819", "GO:0140014", "GO:1903047")
query_1	FALSE	1	175	56	1	0.0178571	0.00571429	GO:0000075	GO:BP	cell cycle checkpoint signaling	21100	35	c("GO:0035556", "GO:1901988")
query_1	FALSE	1	119	56	1	0.0178571	0.00840336	GO:0000077	GO:BP	DNA damage checkpoint signaling	21100	37	c("GO:0031570", "GO:0042770")
query_1	FALSE	1	161	56	1	0.0178571	0.00621118	GO:0000086	GO:BP	G2/M transition of mitotic cell cycle	21100	45	c("GO:0044772", "GO:0044839")
query_1	FALSE	1	1724	56	1	0.0178571	0.000580046	GO:0000377	GO:BP	RNA splicing, via transesterification reactions with bulged adenosine as nucleophile	21100	156	GO:0000375
query_1	FALSE	1	941	56	4	0.0714286	0.0042508	GO:0000122	GO:BP	negative regulation of transcription by RNA polymerase II	21100	64	c("GO:0006357", "GO:0006366", "GO:0045892")
query_1	FALSE	1	268	56	2	0.0357143	0.00746269	GO:0000209	GO:BP	protein polyubiquitination	21100	100	GO:0016567
query_1	FALSE	1	630	56	2	0.0357143	0.0031746	GO:0000226	GO:BP	microtubule cytoskeleton organization	21100	103	c("GO:0007010", "GO:0007017")
query_1	FALSE	1	72	56	1	0.0178571	0.0138889	GO:0000271	GO:BP	polysaccharide biosynthetic process	21100	116	c("GO:0005976", "GO:0009059", "GO:0016051")
query_1	FALSE	1	906	56	4	0.0714286	0.00441501	GO:0000278	GO:BP	mitotic cell cycle	21100	118	GO:0007049
query_1	FALSE	1	454	56	3	0.0535714	0.00660793	GO:0000280	GO:BP	nuclear division	21100	120	GO:0048285
query_1	FALSE	1	193	56	4	0.0714286	0.0207254	GO:0000302	GO:BP	response to reactive oxygen species	21100	132	c("GO:0006979", "GO:1901700")
query_1	FALSE	1	788	56	4	0.0714286	0.00507614	GO:0000165	GO:BP	MAPK cascade	21100	72	GO:0035556
query_1	FALSE	1	302	56	2	0.0357143	0.00662252	GO:0001666	GO:BP	response to hypoxia	21100	488	c("GO:0006950", "GO:0036293")
query_1	FALSE	1	418	56	3	0.0535714	0.00717703	GO:0001667	GO:BP	ameboidal-type cell migration	21100	489	GO:0016477
query_1	FALSE	1	150	56	4	0.0714286	0.0266667	GO:0001678	GO:BP	cellular glucose homeostasis	21100	493	c("GO:0042593", "GO:0055082")
query_1	FALSE	1	321	56	1	0.0178571	0.00311526	GO:0001933	GO:BP	negative regulation of protein phosphorylation	21100	663	c("GO:0001932", "GO:0006468", "GO:0031400", "GO:0042326")
query_1	FALSE	1	735	56	1	0.0178571	0.00136054	GO:0001934	GO:BP	positive regulation of protein phosphorylation	21100	664	c("GO:0001932", "GO:0006468", "GO:0031401", "GO:0042327")
query_1	FALSE	1	152	56	1	0.0178571	0.00657895	GO:0001935	GO:BP	endothelial cell proliferation	21100	665	GO:0050673
query_1	FALSE	1	134	56	1	0.0178571	0.00746269	GO:0001936	GO:BP	regulation of endothelial cell proliferation	21100	666	c("GO:0001935", "GO:0050678")
query_1	FALSE	1	93	56	1	0.0178571	0.0107527	GO:0001938	GO:BP	positive regulation of endothelial cell proliferation	21100	668	c("GO:0001935", "GO:0001936", "GO:0050679")
query_1	FALSE	1	37	56	2	0.0357143	0.0540541	GO:0001941	GO:BP	postsynaptic membrane organization	21100	669	c("GO:0061024", "GO:0099173")
query_1	FALSE	1	1097	56	2	0.0357143	0.00182315	GO:0001932	GO:BP	regulation of protein phosphorylation	21100	662	c("GO:0006468", "GO:0031399", "GO:0042325")
query_1	FALSE	1	731	56	2	0.0357143	0.00273598	GO:0001944	GO:BP	vasculature development	21100	671	c("GO:0048731", "GO:0072359")
query_1	FALSE	1	73	56	1	0.0178571	0.0136986	GO:0001960	GO:BP	negative regulation of cytokine-mediated signaling pathway	21100	685	c("GO:0001959", "GO:0009968", "GO:0019221", "GO:0060761")
query_1	FALSE	1	87	56	1	0.0178571	0.0114943	GO:0002028	GO:BP	regulation of sodium ion transport	21100	747	c("GO:0006814", "GO:0010959")
query_1	FALSE	1	125	56	1	0.0178571	0.008	GO:0002040	GO:BP	sprouting angiogenesis	21100	758	GO:0001525
query_1	FALSE	1	54	56	1	0.0178571	0.0185185	GO:0002042	GO:BP	cell migration involved in sprouting angiogenesis	21100	760	c("GO:0002040", "GO:0043534")
query_1	FALSE	1	24	56	1	0.0178571	0.0416667	GO:0002043	GO:BP	blood vessel endothelial cell proliferation involved in sprouting angiogenesis	21100	761	c("GO:0001935", "GO:0002040")
query_1	FALSE	1	24	56	1	0.0178571	0.0416667	GO:0002053	GO:BP	positive regulation of mesenchymal cell proliferation	21100	770	c("GO:0008284", "GO:0010463", "GO:0010464")
query_1	FALSE	1	150	56	1	0.0178571	0.00666667	GO:0001959	GO:BP	regulation of cytokine-mediated signaling pathway	21100	684	c("GO:0009966", "GO:0019221", "GO:0060759")
query_1	FALSE	1	148	56	1	0.0178571	0.00675676	GO:0001890	GO:BP	placenta development	21100	629	c("GO:0048513", "GO:0048608")
query_1	FALSE	1	134	56	1	0.0178571	0.00746269	GO:0001889	GO:BP	liver development	21100	628	c("GO:0048732", "GO:0061008")
query_1	FALSE	1	33	56	1	0.0178571	0.030303	GO:0001881	GO:BP	receptor recycling	21100	624	GO:0043112
query_1	FALSE	1	394	56	4	0.0714286	0.0101523	GO:0001701	GO:BP	in utero embryonic development	21100	504	GO:0043009
query_1	FALSE	1	121	56	1	0.0178571	0.00826446	GO:0001704	GO:BP	formation of primary germ layer	21100	507	c("GO:0007369", "GO:0048646")
query_1	FALSE	1	71	56	1	0.0178571	0.0140845	GO:0001707	GO:BP	mesoderm formation	21100	510	c("GO:0001704", "GO:0048332")
query_1	FALSE	1	1094	56	8	0.142857	0.00731261	GO:0001775	GO:BP	cell activation	21100	552	GO:0009987
query_1	FALSE	1	94	56	2	0.0357143	0.0212766	GO:0001776	GO:BP	leukocyte homeostasis	21100	553	c("GO:0002376", "GO:0048872")
query_1	FALSE	1	19	56	1	0.0178571	0.0526316	GO:0001780	GO:BP	neutrophil homeostasis	21100	557	c("GO:0001776", "GO:0002262")
query_1	FALSE	1	8	56	1	0.0178571	0.125	GO:0001781	GO:BP	neutrophil apoptotic process	21100	558	c("GO:0001780", "GO:0006925", "GO:0033028", "GO:0071887")
query_1	FALSE	1	31	56	1	0.0178571	0.0322581	GO:0001782	GO:BP	B cell homeostasis	21100	559	GO:0002260
query_1	FALSE	1	24	56	1	0.0178571	0.0416667	GO:0001783	GO:BP	B cell apoptotic process	21100	560	GO:0070227
query_1	FALSE	1	732	56	2	0.0357143	0.00273224	GO:0001816	GO:BP	cytokine production	21100	585	c("GO:0010467", "GO:0032501")
query_1	FALSE	1	726	56	2	0.0357143	0.00275482	GO:0001817	GO:BP	regulation of cytokine production	21100	586	c("GO:0001816", "GO:0010468", "GO:0051239")
query_1	FALSE	1	278	56	2	0.0357143	0.00719424	GO:0001818	GO:BP	negative regulation of cytokine production	21100	587	c("GO:0001816", "GO:0001817", "GO:0010629", "GO:0051241")
query_1	FALSE	1	470	56	1	0.0178571	0.00212766	GO:0001819	GO:BP	positive regulation of cytokine production	21100	588	c("GO:0001816", "GO:0001817", "GO:0010628", "GO:0051240")
query_1	FALSE	1	55	56	1	0.0178571	0.0181818	GO:0001836	GO:BP	release of cytochrome c from mitochondria	21100	605	c("GO:0008637", "GO:0097190")
query_1	FALSE	1	11	56	1	0.0178571	0.0909091	GO:0001844	GO:BP	protein insertion into mitochondrial membrane involved in apoptotic signaling pathway	21100	613	c("GO:0051204", "GO:0097345")
query_1	FALSE	1	88	56	1	0.0178571	0.0113636	GO:0002088	GO:BP	lens development in camera-type eye	21100	792	c("GO:0043010", "GO:0048856")
query_1	FALSE	1	91	56	1	0.0178571	0.010989	GO:0006023	GO:BP	aminoglycan biosynthetic process	21100	2055	c("GO:0006022", "GO:0009059", "GO:1901137", "GO:1901566")
query_1	FALSE	1	87	56	1	0.0178571	0.0114943	GO:0006024	GO:BP	glycosaminoglycan biosynthetic process	21100	2056	c("GO:0006023", "GO:0030203")
query_1	FALSE	1	73	56	2	0.0357143	0.0273973	GO:0006073	GO:BP	cellular glucan metabolic process	21100	2105	c("GO:0044042", "GO:0044264")
query_1	FALSE	1	904	56	2	0.0357143	0.00221239	GO:0007017	GO:BP	microtubule-based process	21100	2938	GO:0009987
query_1	FALSE	1	91	56	1	0.0178571	0.010989	GO:0007029	GO:BP	endoplasmic reticulum organization	21100	2947	c("GO:0006996", "GO:0010256")
query_1	FALSE	1	82	56	1	0.0178571	0.0121951	GO:0007032	GO:BP	endosome organization	21100	2950	c("GO:0010256", "GO:0016050")
query_1	FALSE	1	191	56	2	0.0357143	0.0104712	GO:0007033	GO:BP	vacuole organization	21100	2951	GO:0006996
query_1	FALSE	1	154	56	1	0.0178571	0.00649351	GO:0007034	GO:BP	vacuolar transport	21100	2952	GO:0046907
query_1	FALSE	1	1774	56	11	0.196429	0.00620068	GO:0007049	GO:BP	cell cycle	21100	2963	GO:0009987
query_1	FALSE	1	448	56	1	0.0178571	0.00223214	GO:0007015	GO:BP	actin filament organization	21100	2936	c("GO:0030036", "GO:0097435")
query_1	FALSE	1	192	56	1	0.0178571	0.00520833	GO:0007051	GO:BP	spindle organization	21100	2964	c("GO:0000226", "GO:0022402")
query_1	FALSE	1	344	56	1	0.0178571	0.00290698	GO:0007059	GO:BP	chromosome segregation	21100	2972	GO:0009987
query_1	FALSE	1	57	56	1	0.0178571	0.0175439	GO:0007062	GO:BP	sister chromatid cohesion	21100	2974	c("GO:0000819", "GO:0022402", "GO:0051276")
query_1	FALSE	1	21	56	1	0.0178571	0.047619	GO:0007063	GO:BP	regulation of sister chromatid cohesion	21100	2975	c("GO:0007062", "GO:0010564", "GO:0033044")
query_1	FALSE	1	27	56	1	0.0178571	0.037037	GO:0007064	GO:BP	mitotic sister chromatid cohesion	21100	2976	c("GO:0000070", "GO:0007062", "GO:1903047")
query_1	FALSE	1	134	56	1	0.0178571	0.00746269	GO:0007093	GO:BP	mitotic cell cycle checkpoint signaling	21100	3002	c("GO:0000075", "GO:0045930", "GO:1903047")
query_1	FALSE	1	35	56	1	0.0178571	0.0285714	GO:0007095	GO:BP	mitotic G2 DNA damage checkpoint signaling	21100	3004	c("GO:0044773", "GO:0044818")
query_1	FALSE	1	127	56	1	0.0178571	0.00787402	GO:0007052	GO:BP	mitotic spindle organization	21100	2965	c("GO:0007051", "GO:1902850")
query_1	FALSE	1	128	56	1	0.0178571	0.0078125	GO:0007127	GO:BP	meiosis I	21100	3032	c("GO:0061982", "GO:0140013")
query_1	FALSE	1	1453	56	4	0.0714286	0.00275292	GO:0007010	GO:BP	cytoskeleton organization	21100	2933	GO:0006996
query_1	FALSE	1	528	56	5	0.0892857	0.0094697	GO:0007005	GO:BP	mitochondrion organization	21100	2928	GO:0006996
query_1	FALSE	1	360	56	1	0.0178571	0.00277778	GO:0006887	GO:BP	exocytosis	21100	2830	c("GO:0016192", "GO:0032940")
query_1	FALSE	1	313	56	2	0.0357143	0.00638978	GO:0006913	GO:BP	nucleocytoplasmic transport	21100	2853	GO:0051169
query_1	FALSE	1	541	56	5	0.0892857	0.00924214	GO:0006914	GO:BP	autophagy	21100	2854	c("GO:0044248", "GO:0061919")
query_1	FALSE	1	83	56	1	0.0178571	0.0120482	GO:0006919	GO:BP	activation of cysteine-type endopeptidase activity involved in apoptotic process	21100	2857	GO:0043280
query_1	FALSE	1	24	56	1	0.0178571	0.0416667	GO:0006925	GO:BP	inflammatory cell apoptotic process	21100	2863	GO:0006915
query_1	FALSE	1	2085	56	7	0.125	0.00335731	GO:0006928	GO:BP	movement of cell or subcellular component	21100	2866	GO:0009987
query_1	FALSE	1	117	56	2	0.0357143	0.017094	GO:0007006	GO:BP	mitochondrial membrane organization	21100	2929	c("GO:0007005", "GO:0061024")
query_1	FALSE	1	3851	56	19	0.339286	0.00493378	GO:0006950	GO:BP	response to stress	21100	2884	GO:0050896
query_1	FALSE	1	778	56	2	0.0357143	0.00257069	GO:0006954	GO:BP	inflammatory response	21100	2887	GO:0006952
query_1	FALSE	1	1906	56	3	0.0535714	0.00157398	GO:0006955	GO:BP	immune response	21100	2888	c("GO:0002376", "GO:0050896")
query_1	FALSE	1	826	56	5	0.0892857	0.00605327	GO:0006974	GO:BP	cellular response to DNA damage stimulus	21100	2904	GO:0033554
query_1	FALSE	1	138	56	1	0.0178571	0.00724638	GO:0006986	GO:BP	response to unfolded protein	21100	2913	GO:0035966
query_1	FALSE	1	3874	56	15	0.267857	0.00387197	GO:0006996	GO:BP	organelle organization	21100	2920	GO:0016043
query_1	FALSE	1	71	56	1	0.0178571	0.0140845	GO:0007004	GO:BP	telomere maintenance via telomerase	21100	2927	c("GO:0006278", "GO:0010833")
query_1	FALSE	1	1736	56	3	0.0535714	0.00172811	GO:0006952	GO:BP	defense response	21100	2885	GO:0006950
query_1	FALSE	1	57	56	1	0.0178571	0.0175439	GO:0007131	GO:BP	reciprocal meiotic recombination	21100	3036	c("GO:0007127", "GO:0140527", "GO:1903046")
query_1	FALSE	1	52	56	1	0.0178571	0.0192308	GO:0007140	GO:BP	male meiotic nuclear division	21100	3045	c("GO:0022412", "GO:0048232", "GO:0140013")
query_1	FALSE	1	34	56	1	0.0178571	0.0294118	GO:0007143	GO:BP	female meiotic nuclear division	21100	3048	c("GO:0007292", "GO:0022412", "GO:0140013")
query_1	FALSE	1	2430	56	4	0.0714286	0.00164609	GO:0007399	GO:BP	nervous system development	21100	3276	GO:0048731
query_1	FALSE	1	61	56	1	0.0178571	0.0163934	GO:0007405	GO:BP	neuroblast proliferation	21100	3281	c("GO:0048699", "GO:0061351")
query_1	FALSE	1	438	56	2	0.0357143	0.00456621	GO:0007409	GO:BP	axonogenesis	21100	3284	c("GO:0048667", "GO:0048812", "GO:0061564")
query_1	FALSE	1	1037	56	3	0.0535714	0.00289296	GO:0007417	GO:BP	central nervous system development	21100	3291	c("GO:0007399", "GO:0048731")
query_1	FALSE	1	762	56	3	0.0535714	0.00393701	GO:0007420	GO:BP	brain development	21100	3294	c("GO:0007417", "GO:0048513", "GO:0060322")
query_1	FALSE	1	585	56	1	0.0178571	0.0017094	GO:0007423	GO:BP	sensory organ development	21100	3297	GO:0048513
query_1	FALSE	1	185	56	2	0.0357143	0.0108108	GO:0007369	GO:BP	gastrulation	21100	3248	GO:0048598
query_1	FALSE	1	131	56	1	0.0178571	0.00763359	GO:0007498	GO:BP	mesoderm development	21100	3365	GO:0009888
query_1	FALSE	1	282	56	1	0.0178571	0.0035461	GO:0007548	GO:BP	sex differentiation	21100	3411	GO:0003006
query_1	FALSE	1	171	56	3	0.0535714	0.0175439	GO:0007568	GO:BP	aging	21100	3431	GO:0032502
query_1	FALSE	1	154	56	4	0.0714286	0.025974	GO:0007584	GO:BP	response to nutrient	21100	3446	c("GO:0031667", "GO:0042221")
query_1	FALSE	1	71	56	2	0.0357143	0.028169	GO:0007585	GO:BP	respiratory gaseous exchange by respiratory system	21100	3447	GO:0032501
query_1	FALSE	1	226	56	1	0.0178571	0.00442478	GO:0007596	GO:BP	blood coagulation	21100	3457	c("GO:0007599", "GO:0042060", "GO:0050817")
query_1	FALSE	1	232	56	1	0.0178571	0.00431034	GO:0007599	GO:BP	hemostasis	21100	3460	GO:0050878
query_1	FALSE	1	574	56	1	0.0178571	0.00174216	GO:0007507	GO:BP	heart development	21100	3374	c("GO:0048513", "GO:0072359")
query_1	FALSE	1	475	56	2	0.0357143	0.00421053	GO:0007346	GO:BP	regulation of mitotic cell cycle	21100	3225	c("GO:0000278", "GO:0051726")
query_1	FALSE	1	161	56	1	0.0178571	0.00621118	GO:0007292	GO:BP	female gamete generation	21100	3183	GO:0007276
query_1	FALSE	1	573	56	1	0.0178571	0.0017452	GO:0007283	GO:BP	spermatogenesis	21100	3174	c("GO:0003006", "GO:0048232")
query_1	FALSE	1	1489	56	2	0.0357143	0.00134318	GO:0007155	GO:BP	cell adhesion	21100	3055	GO:0009987
query_1	FALSE	1	373	56	1	0.0178571	0.00268097	GO:0007159	GO:BP	leukocyte cell-cell adhesion	21100	3059	GO:0098609
query_1	FALSE	1	2811	56	14	0.25	0.00498043	GO:0007166	GO:BP	cell surface receptor signaling pathway	21100	3066	GO:0007165
query_1	FALSE	1	951	56	3	0.0535714	0.00315457	GO:0007167	GO:BP	enzyme-linked receptor protein signaling pathway	21100	3067	GO:0007166
query_1	FALSE	1	613	56	3	0.0535714	0.00489396	GO:0007169	GO:BP	transmembrane receptor protein tyrosine kinase signaling pathway	21100	3069	GO:0007167
query_1	FALSE	1	104	56	1	0.0178571	0.00961538	GO:0007173	GO:BP	epidermal growth factor receptor signaling pathway	21100	3073	GO:0038127
query_1	FALSE	1	288	56	2	0.0357143	0.00694444	GO:0007249	GO:BP	I-kappaB kinase/NF-kappaB signaling	21100	3142	GO:0035556
query_1	FALSE	1	174	56	2	0.0357143	0.0114943	GO:0007254	GO:BP	JNK cascade	21100	3147	GO:0051403
query_1	FALSE	1	510	56	3	0.0535714	0.00588235	GO:0007264	GO:BP	small GTPase mediated signal transduction	21100	3155	GO:0035556
query_1	FALSE	1	348	56	2	0.0357143	0.00574713	GO:0007265	GO:BP	Ras protein signal transduction	21100	3156	GO:0007264
query_1	FALSE	1	1661	56	9	0.160714	0.00541842	GO:0007267	GO:BP	cell-cell signaling	21100	3158	c("GO:0007154", "GO:0023052")
query_1	FALSE	1	709	56	2	0.0357143	0.00282087	GO:0007268	GO:BP	chemical synaptic transmission	21100	3159	GO:0098916
query_1	FALSE	1	4768	56	17	0.303571	0.00356544	GO:0007275	GO:BP	multicellular organism development	21100	3166	c("GO:0032501", "GO:0048856")
query_1	FALSE	1	741	56	2	0.0357143	0.00269906	GO:0007276	GO:BP	gamete generation	21100	3167	c("GO:0019953", "GO:0048609")
query_1	FALSE	1	302	56	1	0.0178571	0.00331126	GO:0007281	GO:BP	germ cell development	21100	3172	c("GO:0003006", "GO:0007276", "GO:0022412", "GO:0048468")
query_1	FALSE	1	1084	56	3	0.0535714	0.00276753	GO:0006886	GO:BP	intracellular protein transport	21100	2829	c("GO:0015031", "GO:0034613", "GO:0046907")
query_1	FALSE	1	93	56	1	0.0178571	0.0107527	GO:0006885	GO:BP	regulation of pH	21100	2828	GO:0055067
query_1	FALSE	1	63	56	1	0.0178571	0.015873	GO:0006879	GO:BP	cellular iron ion homeostasis	21100	2822	c("GO:0046916", "GO:0055072")
query_1	FALSE	1	418	56	2	0.0357143	0.00478469	GO:0006875	GO:BP	cellular metal ion homeostasis	21100	2818	c("GO:0030003", "GO:0055065")
query_1	FALSE	1	3719	56	17	0.303571	0.00457112	GO:0006464	GO:BP	cellular protein modification process	21100	2443	c("GO:0036211", "GO:0044267")
query_1	FALSE	1	1587	56	6	0.107143	0.00378072	GO:0006468	GO:BP	protein phosphorylation	21100	2446	c("GO:0006464", "GO:0016310")
query_1	FALSE	1	203	56	1	0.0178571	0.00492611	GO:0006469	GO:BP	negative regulation of protein kinase activity	21100	2447	c("GO:0001933", "GO:0033673", "GO:0045859")
query_1	FALSE	1	35	56	1	0.0178571	0.0285714	GO:0006471	GO:BP	protein ADP-ribosylation	21100	2449	GO:0006464
query_1	FALSE	1	219	56	1	0.0178571	0.00456621	GO:0006473	GO:BP	protein acetylation	21100	2450	GO:0043543
query_1	FALSE	1	179	56	1	0.0178571	0.00558659	GO:0006475	GO:BP	internal protein amino acid acetylation	21100	2452	GO:0006473
query_1	FALSE	1	199	56	1	0.0178571	0.00502513	GO:0006403	GO:BP	RNA localization	21100	2394	GO:0033036
query_1	FALSE	1	204	56	1	0.0178571	0.00490196	GO:0006479	GO:BP	protein methylation	21100	2456	c("GO:0008213", "GO:0043414")
query_1	FALSE	1	1787	56	9	0.160714	0.00503637	GO:0006508	GO:BP	proteolysis	21100	2483	GO:0019538
query_1	FALSE	1	675	56	6	0.107143	0.00888889	GO:0006511	GO:BP	ubiquitin-dependent protein catabolic process	21100	2486	GO:0019941
query_1	FALSE	1	894	56	3	0.0535714	0.0033557	GO:0006518	GO:BP	peptide metabolic process	21100	2492	c("GO:0043603", "GO:1901564")
query_1	FALSE	1	313	56	3	0.0535714	0.00958466	GO:0006520	GO:BP	cellular amino acid metabolic process	21100	2493	c("GO:0019752", "GO:0044238", "GO:1901564")
query_1	FALSE	1	33	56	1	0.0178571	0.030303	GO:0006521	GO:BP	regulation of cellular amino acid metabolic process	21100	2494	c("GO:0006520", "GO:0010565", "GO:0033238", "GO:0080090")
query_1	FALSE	1	190	56	3	0.0535714	0.0157895	GO:0006575	GO:BP	cellular modified amino acid metabolic process	21100	2548	c("GO:0044237", "GO:1901564")
query_1	FALSE	1	96	56	1	0.0178571	0.0104167	GO:0006497	GO:BP	protein lipidation	21100	2472	c("GO:0006464", "GO:0042158")
query_1	FALSE	1	1917	56	2	0.0357143	0.0010433	GO:0006397	GO:BP	mRNA processing	21100	2388	c("GO:0006396", "GO:0016071")
query_1	FALSE	1	3357	56	3	0.0535714	0.000893655	GO:0006396	GO:BP	RNA processing	21100	2387	c("GO:0010467", "GO:0016070")
query_1	FALSE	1	2653	56	13	0.232143	0.00490011	GO:0006366	GO:BP	transcription by RNA polymerase II	21100	2362	GO:0006351
query_1	FALSE	1	988	56	4	0.0714286	0.00404858	GO:0006082	GO:BP	organic acid metabolic process	21100	2114	c("GO:0044237", "GO:0044281", "GO:0071704")
query_1	FALSE	1	501	56	3	0.0535714	0.00598802	GO:0006091	GO:BP	generation of precursor metabolites and energy	21100	2122	GO:0044237
query_1	FALSE	1	179	56	1	0.0178571	0.00558659	GO:0006109	GO:BP	regulation of carbohydrate metabolic process	21100	2137	c("GO:0005975", "GO:0080090")
query_1	FALSE	1	85	56	2	0.0357143	0.0235294	GO:0006112	GO:BP	energy reserve metabolic process	21100	2140	GO:0015980
query_1	FALSE	1	7998	56	20	0.357143	0.00250063	GO:0006139	GO:BP	nucleobase-containing compound metabolic process	21100	2164	c("GO:0006725", "GO:0034641", "GO:0044238", "GO:0046483", "GO:1901360")
query_1	FALSE	1	1023	56	4	0.0714286	0.00391007	GO:0006259	GO:BP	DNA metabolic process	21100	2277	c("GO:0044260", "GO:0090304")
query_1	FALSE	1	72	56	1	0.0178571	0.0138889	GO:0006278	GO:BP	RNA-templated DNA biosynthetic process	21100	2294	GO:0071897
query_1	FALSE	1	537	56	2	0.0357143	0.00372439	GO:0006281	GO:BP	DNA repair	21100	2297	c("GO:0006259", "GO:0006974")
query_1	FALSE	1	273	56	1	0.0178571	0.003663	GO:0006302	GO:BP	double-strand break repair	21100	2317	GO:0006281
query_1	FALSE	1	321	56	1	0.0178571	0.00311526	GO:0006310	GO:BP	DNA recombination	21100	2325	GO:0006259
query_1	FALSE	1	626	56	2	0.0357143	0.00319489	GO:0006325	GO:BP	chromatin organization	21100	2333	c("GO:0016043", "GO:0051276")
query_1	FALSE	1	294	56	1	0.0178571	0.00340136	GO:0006338	GO:BP	chromatin remodeling	21100	2343	GO:0006325
query_1	FALSE	1	3579	56	16	0.285714	0.00447052	GO:0006351	GO:BP	transcription, DNA-templated	21100	2349	GO:0097659
query_1	FALSE	1	3451	56	16	0.285714	0.00463634	GO:0006355	GO:BP	regulation of transcription, DNA-templated	21100	2353	c("GO:0006351", "GO:0010468", "GO:1903506")
query_1	FALSE	1	2559	56	13	0.232143	0.00508011	GO:0006357	GO:BP	regulation of transcription by RNA polymerase II	21100	2355	c("GO:0006355", "GO:0006366")
query_1	FALSE	1	24	56	1	0.0178571	0.0416667	GO:0006582	GO:BP	melanin metabolic process	21100	2555	c("GO:0018958", "GO:0019748", "GO:0042440")
query_1	FALSE	1	263	56	2	0.0357143	0.00760456	GO:0007611	GO:BP	learning or memory	21100	3471	c("GO:0007610", "GO:0050890")
query_1	FALSE	1	163	56	1	0.0178571	0.00613497	GO:0006606	GO:BP	protein import into nucleus	21100	2578	c("GO:0006886", "GO:0034504", "GO:0051170", "GO:0072594")
query_1	FALSE	1	1392	56	2	0.0357143	0.00143678	GO:0006629	GO:BP	lipid metabolic process	21100	2601	c("GO:0044238", "GO:0071704")
query_1	FALSE	1	1551	56	5	0.0892857	0.00322373	GO:0006811	GO:BP	ion transport	21100	2767	GO:0006810
query_1	FALSE	1	1173	56	3	0.0535714	0.00255754	GO:0006812	GO:BP	cation transport	21100	2768	GO:0006811
query_1	FALSE	1	241	56	1	0.0178571	0.00414938	GO:0006813	GO:BP	potassium ion transport	21100	2769	GO:0030001
query_1	FALSE	1	249	56	1	0.0178571	0.00401606	GO:0006814	GO:BP	sodium ion transport	21100	2770	GO:0030001
query_1	FALSE	1	423	56	1	0.0178571	0.00236407	GO:0006816	GO:BP	calcium ion transport	21100	2772	GO:0030001
query_1	FALSE	1	516	56	2	0.0357143	0.00387597	GO:0006820	GO:BP	anion transport	21100	2774	GO:0006811
query_1	FALSE	1	4742	56	15	0.267857	0.00316322	GO:0006810	GO:BP	transport	21100	2766	GO:0051234
query_1	FALSE	1	56	56	1	0.0178571	0.0178571	GO:0006826	GO:BP	iron ion transport	21100	2779	GO:0000041
query_1	FALSE	1	190	56	2	0.0357143	0.0105263	GO:0006839	GO:BP	mitochondrial transport	21100	2788	GO:0046907
query_1	FALSE	1	16	56	1	0.0178571	0.0625	GO:0006857	GO:BP	oligopeptide transport	21100	2805	GO:0015833
query_1	FALSE	1	147	56	1	0.0178571	0.00680272	GO:0006865	GO:BP	amino acid transport	21100	2812	c("GO:0015849", "GO:0071705")
query_1	FALSE	1	408	56	1	0.0178571	0.00245098	GO:0006869	GO:BP	lipid transport	21100	2815	c("GO:0010876", "GO:0071702")
query_1	FALSE	1	506	56	3	0.0535714	0.00592885	GO:0006873	GO:BP	cellular ion homeostasis	21100	2816	c("GO:0050801", "GO:0055082")
query_1	FALSE	1	287	56	1	0.0178571	0.00348432	GO:0006874	GO:BP	cellular calcium ion homeostasis	21100	2817	c("GO:0006875", "GO:0055074", "GO:0072503")
query_1	FALSE	1	90	56	1	0.0178571	0.0111111	GO:0006835	GO:BP	dicarboxylic acid transport	21100	2784	GO:0046942
query_1	FALSE	1	12153	56	39	0.696429	0.00320908	GO:0006807	GO:BP	nitrogen compound metabolic process	21100	2763	GO:0008152
query_1	FALSE	1	2781	56	8	0.142857	0.00287666	GO:0006796	GO:BP	phosphate-containing compound metabolic process	21100	2752	GO:0006793
query_1	FALSE	1	2803	56	8	0.142857	0.00285408	GO:0006793	GO:BP	phosphorus metabolic process	21100	2749	GO:0044237
query_1	FALSE	1	392	56	1	0.0178571	0.00255102	GO:0006631	GO:BP	fatty acid metabolic process	21100	2603	c("GO:0032787", "GO:0044255")
query_1	FALSE	1	76	56	1	0.0178571	0.0131579	GO:0006635	GO:BP	fatty acid beta-oxidation	21100	2606	c("GO:0009062", "GO:0019395")
query_1	FALSE	1	393	56	1	0.0178571	0.00254453	GO:0006644	GO:BP	phospholipid metabolic process	21100	2615	c("GO:0006796", "GO:0019637", "GO:0044255")
query_1	FALSE	1	312	56	1	0.0178571	0.00320513	GO:0006650	GO:BP	glycerophospholipid metabolic process	21100	2620	c("GO:0006644", "GO:0046486")
query_1	FALSE	1	38	56	1	0.0178571	0.0263158	GO:0006654	GO:BP	phosphatidic acid biosynthetic process	21100	2623	c("GO:0046473", "GO:0046474")
query_1	FALSE	1	8224	56	22	0.392857	0.0026751	GO:0006725	GO:BP	cellular aromatic compound metabolic process	21100	2692	GO:0044237
query_1	FALSE	1	63	56	3	0.0535714	0.047619	GO:0006749	GO:BP	glutathione metabolic process	21100	2713	c("GO:0006518", "GO:0006575", "GO:0006790")
query_1	FALSE	1	110	56	1	0.0178571	0.00909091	GO:0006766	GO:BP	vitamin metabolic process	21100	2724	GO:0044281
query_1	FALSE	1	62	56	1	0.0178571	0.016129	GO:0006767	GO:BP	water-soluble vitamin metabolic process	21100	2725	GO:0006766
query_1	FALSE	1	54	56	2	0.0357143	0.037037	GO:0006778	GO:BP	porphyrin-containing compound metabolic process	21100	2734	GO:0033013
query_1	FALSE	1	36	56	1	0.0178571	0.0277778	GO:0006779	GO:BP	porphyrin-containing compound biosynthetic process	21100	2735	c("GO:0006778", "GO:0033014")
query_1	FALSE	1	32	56	1	0.0178571	0.03125	GO:0006783	GO:BP	heme biosynthetic process	21100	2739	c("GO:0006779", "GO:0042168", "GO:0046148")
query_1	FALSE	1	12	56	1	0.0178571	0.0833333	GO:0006787	GO:BP	porphyrin-containing compound catabolic process	21100	2743	c("GO:0006778", "GO:0033015")
query_1	FALSE	1	2	56	1	0.0178571	0.5	GO:0006788	GO:BP	heme oxidation	21100	2744	c("GO:0006787", "GO:0042168")
query_1	FALSE	1	343	56	4	0.0714286	0.0116618	GO:0006790	GO:BP	sulfur compound metabolic process	21100	2746	GO:0044237
query_1	FALSE	1	59	56	1	0.0178571	0.0169492	GO:0006611	GO:BP	protein export from nucleus	21100	2583	c("GO:0006886", "GO:0051168")
query_1	FALSE	1	83	56	1	0.0178571	0.0120482	GO:0030641	GO:BP	regulation of cellular pH	21100	7929	c("GO:0006885", "GO:0030004")
query_1	FALSE	1	194	56	1	0.0178571	0.00515464	GO:0030705	GO:BP	cytoskeleton-dependent intracellular transport	21100	7948	GO:0046907
query_1	FALSE	1	670	56	2	0.0357143	0.00298507	GO:0030855	GO:BP	epithelial cell differentiation	21100	8026	c("GO:0030154", "GO:0060429")
query_1	FALSE	1	42	56	1	0.0178571	0.0238095	GO:0045109	GO:BP	intermediate filament organization	21100	13127	c("GO:0045104", "GO:0097435")
query_1	FALSE	1	231	56	1	0.0178571	0.004329	GO:0045137	GO:BP	development of primary sexual characteristics	21100	13141	c("GO:0003006", "GO:0007275", "GO:0007548")
query_1	FALSE	1	1889	56	10	0.178571	0.00529381	GO:0045184	GO:BP	establishment of protein localization	21100	13161	c("GO:0008104", "GO:0051234")
query_1	FALSE	1	203	56	1	0.0178571	0.00492611	GO:0045216	GO:BP	cell-cell junction organization	21100	13186	GO:0034330
query_1	FALSE	1	953	56	5	0.0892857	0.00524659	GO:0045321	GO:BP	leukocyte activation	21100	13217	c("GO:0001775", "GO:0002376")
query_1	FALSE	1	25	56	1	0.0178571	0.04	GO:0045324	GO:BP	late endosome to vacuole transport	21100	13218	c("GO:0007034", "GO:0016192")
query_1	FALSE	1	66	56	1	0.0178571	0.0151515	GO:0045104	GO:BP	intermediate filament cytoskeleton organization	21100	13122	c("GO:0007010", "GO:0045103")
query_1	FALSE	1	232	56	1	0.0178571	0.00431034	GO:0045444	GO:BP	fat cell differentiation	21100	13243	GO:0030154
query_1	FALSE	1	119	56	1	0.0178571	0.00840336	GO:0045471	GO:BP	response to ethanol	21100	13266	GO:0097305
query_1	FALSE	1	64	56	1	0.0178571	0.015625	GO:0045576	GO:BP	mast cell activation	21100	13308	GO:0002274
query_1	FALSE	1	154	56	1	0.0178571	0.00649351	GO:0045580	GO:BP	regulation of T cell differentiation	21100	13312	c("GO:0030217", "GO:0045619", "GO:0050863")
query_1	FALSE	1	95	56	1	0.0178571	0.0105263	GO:0045582	GO:BP	positive regulation of T cell differentiation	21100	13314	c("GO:0030217", "GO:0045580", "GO:0045621", "GO:0050870")
query_1	FALSE	1	1550	56	8	0.142857	0.00516129	GO:0045595	GO:BP	regulation of cell differentiation	21100	13327	c("GO:0030154", "GO:0050793", "GO:0050794")
query_1	FALSE	1	660	56	4	0.0714286	0.00606061	GO:0045596	GO:BP	negative regulation of cell differentiation	21100	13328	c("GO:0030154", "GO:0045595", "GO:0048523", "GO:0051093")
query_1	FALSE	1	38	56	2	0.0357143	0.0526316	GO:0045454	GO:BP	cell redox homeostasis	21100	13250	c("GO:0019725", "GO:0050794")
query_1	FALSE	1	840	56	4	0.0714286	0.0047619	GO:0045597	GO:BP	positive regulation of cell differentiation	21100	13329	c("GO:0030154", "GO:0045595", "GO:0048522", "GO:0051094")
query_1	FALSE	1	67	56	1	0.0178571	0.0149254	GO:0045103	GO:BP	intermediate filament-based process	21100	13121	GO:0009987
query_1	FALSE	1	240	56	1	0.0178571	0.00416667	GO:0045055	GO:BP	regulated exocytosis	21100	13100	GO:0006887
query_1	FALSE	1	1659	56	4	0.0714286	0.00241109	GO:0044419	GO:BP	biological process involved in interspecies interaction between organisms	21100	12783	GO:0008150
query_1	FALSE	1	17	56	1	0.0178571	0.0588235	GO:0044539	GO:BP	long-chain fatty acid import into cell	21100	12852	c("GO:0015909", "GO:0140354")
query_1	FALSE	1	25	56	1	0.0178571	0.04	GO:0044550	GO:BP	secondary metabolite biosynthetic process	21100	12858	c("GO:0009058", "GO:0019748")
query_1	FALSE	1	538	56	1	0.0178571	0.00185874	GO:0044770	GO:BP	cell cycle phase transition	21100	12978	GO:0022402
query_1	FALSE	1	440	56	1	0.0178571	0.00227273	GO:0044772	GO:BP	mitotic cell cycle phase transition	21100	12980	c("GO:0044770", "GO:1903047")
query_1	FALSE	1	84	56	1	0.0178571	0.0119048	GO:0044773	GO:BP	mitotic DNA damage checkpoint signaling	21100	12981	c("GO:0000077", "GO:0044774")
query_1	FALSE	1	907	56	1	0.0178571	0.00110254	GO:0045087	GO:BP	innate immune response	21100	13117	c("GO:0006955", "GO:0098542")
query_1	FALSE	1	88	56	1	0.0178571	0.0113636	GO:0044774	GO:BP	mitotic DNA integrity checkpoint signaling	21100	12982	c("GO:0007093", "GO:0031570")
query_1	FALSE	1	8	56	1	0.0178571	0.125	GO:0044805	GO:BP	late nucleophagy	21100	13002	GO:0044804
query_1	FALSE	1	48	56	1	0.0178571	0.0208333	GO:0044818	GO:BP	mitotic G2/M transition checkpoint	21100	13011	c("GO:0007093", "GO:0010972")
query_1	FALSE	1	177	56	1	0.0178571	0.00564972	GO:0044839	GO:BP	cell cycle G2/M phase transition	21100	13027	GO:0044770
query_1	FALSE	1	55	56	1	0.0178571	0.0181818	GO:0045010	GO:BP	actin nucleation	21100	13068	GO:0007015
query_1	FALSE	1	255	56	1	0.0178571	0.00392157	GO:0045017	GO:BP	glycerolipid biosynthetic process	21100	13072	c("GO:0008610", "GO:0044249", "GO:0046486")
query_1	FALSE	1	25	56	1	0.0178571	0.04	GO:0045048	GO:BP	protein insertion into ER membrane	21100	13093	c("GO:0007029", "GO:0033365", "GO:0051205")
query_1	FALSE	1	17	56	1	0.0178571	0.0588235	GO:0044804	GO:BP	autophagy of nucleus	21100	13001	GO:0006914
query_1	FALSE	1	133	56	1	0.0178571	0.0075188	GO:0045598	GO:BP	regulation of fat cell differentiation	21100	13330	c("GO:0045444", "GO:0045595")
query_1	FALSE	1	66	56	1	0.0178571	0.0151515	GO:0045600	GO:BP	positive regulation of fat cell differentiation	21100	13332	c("GO:0045444", "GO:0045597", "GO:0045598")
query_1	FALSE	1	57	56	1	0.0178571	0.0175439	GO:0045604	GO:BP	regulation of epidermal cell differentiation	21100	13336	c("GO:0009913", "GO:0030856", "GO:0045682")
query_1	FALSE	1	368	56	2	0.0357143	0.00543478	GO:0045862	GO:BP	positive regulation of proteolysis	21100	13576	c("GO:0006508", "GO:0030162", "GO:0032270")
query_1	FALSE	1	5	56	1	0.0178571	0.2	GO:0045875	GO:BP	negative regulation of sister chromatid cohesion	21100	13587	c("GO:0007062", "GO:0007063", "GO:0010948", "GO:2001251")
query_1	FALSE	1	1293	56	5	0.0892857	0.00386698	GO:0045892	GO:BP	negative regulation of transcription, DNA-templated	21100	13602	c("GO:0006351", "GO:0006355", "GO:1903507")
query_1	FALSE	1	1636	56	9	0.160714	0.00550122	GO:0045893	GO:BP	positive regulation of transcription, DNA-templated	21100	13603	c("GO:0006351", "GO:0006355", "GO:1903508")
query_1	FALSE	1	73	56	1	0.0178571	0.0136986	GO:0045913	GO:BP	positive regulation of carbohydrate metabolic process	21100	13621	c("GO:0005975", "GO:0006109", "GO:0009893")
query_1	FALSE	1	34	56	1	0.0178571	0.0294118	GO:0045920	GO:BP	negative regulation of exocytosis	21100	13628	c("GO:0006887", "GO:0017157", "GO:1903531")
query_1	FALSE	1	339	56	2	0.0357143	0.00589971	GO:0045861	GO:BP	negative regulation of proteolysis	21100	13575	c("GO:0006508", "GO:0030162", "GO:0032269")
query_1	FALSE	1	37	56	1	0.0178571	0.027027	GO:0045923	GO:BP	positive regulation of fatty acid metabolic process	21100	13631	c("GO:0006631", "GO:0019217", "GO:0031325", "GO:0045834", "GO:0062013")
query_1	FALSE	1	255	56	1	0.0178571	0.00392157	GO:0045927	GO:BP	positive regulation of growth	21100	13635	c("GO:0040007", "GO:0040008", "GO:0048518")
query_1	FALSE	1	240	56	2	0.0357143	0.00833333	GO:0045930	GO:BP	negative regulation of mitotic cell cycle	21100	13638	c("GO:0000278", "GO:0007346", "GO:0045786")
query_1	FALSE	1	1533	56	6	0.107143	0.00391389	GO:0045934	GO:BP	negative regulation of nucleobase-containing compound metabolic process	21100	13642	c("GO:0006139", "GO:0019219", "GO:0031324", "GO:0051172")
query_1	FALSE	1	1976	56	9	0.160714	0.00455466	GO:0045935	GO:BP	positive regulation of nucleobase-containing compound metabolic process	21100	13643	c("GO:0006139", "GO:0019219", "GO:0031325", "GO:0051173")
query_1	FALSE	1	417	56	2	0.0357143	0.00479616	GO:0045936	GO:BP	negative regulation of phosphate metabolic process	21100	13644	c("GO:0006796", "GO:0010563", "GO:0019220")
query_1	FALSE	1	895	56	1	0.0178571	0.00111732	GO:0045937	GO:BP	positive regulation of phosphate metabolic process	21100	13645	c("GO:0006796", "GO:0010562", "GO:0019220")
query_1	FALSE	1	245	56	3	0.0535714	0.0122449	GO:0045926	GO:BP	negative regulation of growth	21100	13634	c("GO:0040007", "GO:0040008", "GO:0048519")
query_1	FALSE	1	653	56	1	0.0178571	0.00153139	GO:0045859	GO:BP	regulation of protein kinase activity	21100	13573	c("GO:0001932", "GO:0043549")
query_1	FALSE	1	152	56	1	0.0178571	0.00657895	GO:0045834	GO:BP	positive regulation of lipid metabolic process	21100	13550	c("GO:0006629", "GO:0009893", "GO:0019216")
query_1	FALSE	1	13	56	1	0.0178571	0.0769231	GO:0045815	GO:BP	epigenetic maintenance of chromatin in transcription-competent conformation	21100	13533	c("GO:0010628", "GO:0040029")
query_1	FALSE	1	185	56	1	0.0178571	0.00540541	GO:0045619	GO:BP	regulation of lymphocyte differentiation	21100	13351	c("GO:0030098", "GO:0051249", "GO:1902105")
query_1	FALSE	1	109	56	1	0.0178571	0.00917431	GO:0045621	GO:BP	positive regulation of lymphocyte differentiation	21100	13353	c("GO:0030098", "GO:0045619", "GO:0051251", "GO:1902107")
query_1	FALSE	1	37	56	1	0.0178571	0.027027	GO:0045622	GO:BP	regulation of T-helper cell differentiation	21100	13354	c("GO:0002697", "GO:0042093", "GO:0043370", "GO:0050776")
query_1	FALSE	1	21	56	1	0.0178571	0.047619	GO:0045624	GO:BP	positive regulation of T-helper cell differentiation	21100	13356	c("GO:0002699", "GO:0042093", "GO:0043372", "GO:0045622", "GO:0050778")
query_1	FALSE	1	126	56	2	0.0357143	0.015873	GO:0045667	GO:BP	regulation of osteoblast differentiation	21100	13399	c("GO:0001649", "GO:0045595")
query_1	FALSE	1	47	56	1	0.0178571	0.0212766	GO:0045668	GO:BP	negative regulation of osteoblast differentiation	21100	13400	c("GO:0001649", "GO:0045596", "GO:0045667")
query_1	FALSE	1	68	56	1	0.0178571	0.0147059	GO:0045669	GO:BP	positive regulation of osteoblast differentiation	21100	13401	c("GO:0001649", "GO:0045597", "GO:0045667")
query_1	FALSE	1	64	56	1	0.0178571	0.015625	GO:0045682	GO:BP	regulation of epidermis development	21100	13411	c("GO:0008544", "GO:0050793")
query_1	FALSE	1	15	56	1	0.0178571	0.0666667	GO:0045725	GO:BP	positive regulation of glycogen biosynthetic process	21100	13453	c("GO:0005978", "GO:0005979", "GO:0010557", "GO:0031328", "GO:0070875")
query_1	FALSE	1	238	56	1	0.0178571	0.00420168	GO:0045732	GO:BP	positive regulation of protein catabolic process	21100	13459	c("GO:0009896", "GO:0030163", "GO:0042176", "GO:0051247")
query_1	FALSE	1	283	56	1	0.0178571	0.00353357	GO:0045765	GO:BP	regulation of angiogenesis	21100	13491	c("GO:0001525", "GO:0022603", "GO:1901342")
query_1	FALSE	1	162	56	1	0.0178571	0.00617284	GO:0045766	GO:BP	positive regulation of angiogenesis	21100	13492	c("GO:0001525", "GO:0045765", "GO:1904018")
query_1	FALSE	1	442	56	1	0.0178571	0.00226244	GO:0045785	GO:BP	positive regulation of cell adhesion	21100	13511	c("GO:0007155", "GO:0030155", "GO:0048522")
query_1	FALSE	1	388	56	3	0.0535714	0.00773196	GO:0045786	GO:BP	negative regulation of cell cycle	21100	13512	c("GO:0007049", "GO:0048523", "GO:0051726")
query_1	FALSE	1	9	56	1	0.0178571	0.111111	GO:0045792	GO:BP	negative regulation of cell size	21100	13514	GO:0008361
query_1	FALSE	1	58	56	1	0.0178571	0.0172414	GO:0044380	GO:BP	protein localization to cytoskeleton	21100	12759	GO:0033365
query_1	FALSE	1	1211	56	6	0.107143	0.00495458	GO:0045944	GO:BP	positive regulation of transcription by RNA polymerase II	21100	13651	c("GO:0006357", "GO:0006366", "GO:0045893")
query_1	FALSE	1	104	56	2	0.0357143	0.0192308	GO:0044344	GO:BP	cellular response to fibroblast growth factor stimulus	21100	12738	c("GO:0071363", "GO:0071495", "GO:0071774")
query_1	FALSE	1	1796	56	4	0.0714286	0.00222717	GO:0044281	GO:BP	small molecule metabolic process	21100	12712	GO:0008152
query_1	FALSE	1	333	56	1	0.0178571	0.003003	GO:0043414	GO:BP	macromolecule methylation	21100	12303	c("GO:0032259", "GO:0043412", "GO:0044260")
query_1	FALSE	1	174	56	2	0.0357143	0.0114943	GO:0043433	GO:BP	negative regulation of DNA-binding transcription factor activity	21100	12312	c("GO:0044092", "GO:0051090")
query_1	FALSE	1	398	56	3	0.0535714	0.00753769	GO:0043434	GO:BP	response to peptide hormone	21100	12313	c("GO:0009725", "GO:1901652")
query_1	FALSE	1	966	56	4	0.0714286	0.00414079	GO:0043436	GO:BP	oxoacid metabolic process	21100	12315	GO:0006082
query_1	FALSE	1	14	56	1	0.0178571	0.0714286	GO:0043455	GO:BP	regulation of secondary metabolic process	21100	12331	c("GO:0019222", "GO:0019748")
query_1	FALSE	1	130	56	1	0.0178571	0.00769231	GO:0043467	GO:BP	regulation of generation of precursor metabolites and energy	21100	12343	c("GO:0006091", "GO:0031323")
query_1	FALSE	1	3936	56	17	0.303571	0.00431911	GO:0043412	GO:BP	macromolecule modification	21100	12301	GO:0043170
query_1	FALSE	1	102	56	1	0.0178571	0.00980392	GO:0043500	GO:BP	muscle adaptation	21100	12369	c("GO:0003012", "GO:0050896")
query_1	FALSE	1	146	56	3	0.0535714	0.0205479	GO:0043524	GO:BP	negative regulation of neuron apoptotic process	21100	12384	c("GO:0043066", "GO:0043523", "GO:0051402", "GO:1901215")
query_1	FALSE	1	50	56	1	0.0178571	0.02	GO:0043525	GO:BP	positive regulation of neuron apoptotic process	21100	12385	c("GO:0043065", "GO:0043523", "GO:0051402", "GO:1901216")
query_1	FALSE	1	113	56	1	0.0178571	0.00884956	GO:0043534	GO:BP	blood vessel endothelial cell migration	21100	12387	GO:0043542
query_1	FALSE	1	89	56	1	0.0178571	0.011236	GO:0043535	GO:BP	regulation of blood vessel endothelial cell migration	21100	12388	c("GO:0010594", "GO:0043534")
query_1	FALSE	1	52	56	1	0.0178571	0.0192308	GO:0043536	GO:BP	positive regulation of blood vessel endothelial cell migration	21100	12389	c("GO:0010595", "GO:0043534", "GO:0043535")
query_1	FALSE	1	215	56	1	0.0178571	0.00465116	GO:0043542	GO:BP	endothelial cell migration	21100	12392	GO:0010631
query_1	FALSE	1	207	56	4	0.0714286	0.0193237	GO:0043523	GO:BP	regulation of neuron apoptotic process	21100	12383	c("GO:0042981", "GO:0051402", "GO:1901214")
query_1	FALSE	1	261	56	1	0.0178571	0.00383142	GO:0043543	GO:BP	protein acylation	21100	12393	GO:0006464
query_1	FALSE	1	479	56	2	0.0357143	0.00417537	GO:0043410	GO:BP	positive regulation of MAPK cascade	21100	12300	c("GO:0000165", "GO:0043408", "GO:1902533")
query_1	FALSE	1	137	56	1	0.0178571	0.00729927	GO:0043401	GO:BP	steroid hormone mediated signaling pathway	21100	12292	c("GO:0009755", "GO:0071383")
query_1	FALSE	1	103	56	1	0.0178571	0.00970874	GO:0043266	GO:BP	regulation of potassium ion transport	21100	12209	c("GO:0006813", "GO:0010959")
query_1	FALSE	1	681	56	1	0.0178571	0.00146843	GO:0043269	GO:BP	regulation of ion transport	21100	12212	c("GO:0006811", "GO:0051049")
query_1	FALSE	1	126	56	1	0.0178571	0.00793651	GO:0043280	GO:BP	positive regulation of cysteine-type endopeptidase activity involved in apoptotic process	21100	12220	c("GO:0043281", "GO:2001056")
query_1	FALSE	1	202	56	2	0.0357143	0.00990099	GO:0043281	GO:BP	regulation of cysteine-type endopeptidase activity involved in apoptotic process	21100	12221	GO:2000116
query_1	FALSE	1	77	56	1	0.0178571	0.012987	GO:0043299	GO:BP	leukocyte degranulation	21100	12228	c("GO:0002252", "GO:0045055", "GO:0051649")
query_1	FALSE	1	49	56	1	0.0178571	0.0204082	GO:0043300	GO:BP	regulation of leukocyte degranulation	21100	12229	c("GO:0002697", "GO:0043299", "GO:1903305")
query_1	FALSE	1	664	56	4	0.0714286	0.0060241	GO:0043408	GO:BP	regulation of MAPK cascade	21100	12298	c("GO:0000165", "GO:1902531")
query_1	FALSE	1	13	56	1	0.0178571	0.0769231	GO:0043301	GO:BP	negative regulation of leukocyte degranulation	21100	12230	c("GO:0002698", "GO:0043299", "GO:0043300", "GO:1903306")
query_1	FALSE	1	31	56	1	0.0178571	0.0322581	GO:0043304	GO:BP	regulation of mast cell degranulation	21100	12233	c("GO:0002886", "GO:0033006", "GO:0043300", "GO:0043303", "GO:0060341")
query_1	FALSE	1	6	56	1	0.0178571	0.166667	GO:0043305	GO:BP	negative regulation of mast cell degranulation	21100	12234	c("GO:0002887", "GO:0033007", "GO:0043301", "GO:0043303", "GO:0043304")
query_1	FALSE	1	83	56	1	0.0178571	0.0120482	GO:0043367	GO:BP	CD4-positive, alpha-beta T cell differentiation	21100	12266	c("GO:0035710", "GO:0046632")
query_1	FALSE	1	49	56	1	0.0178571	0.0204082	GO:0043370	GO:BP	regulation of CD4-positive, alpha-beta T cell differentiation	21100	12269	c("GO:0043367", "GO:0046637", "GO:2000514")
query_1	FALSE	1	31	56	1	0.0178571	0.0322581	GO:0043372	GO:BP	positive regulation of CD4-positive, alpha-beta T cell differentiation	21100	12271	c("GO:0043367", "GO:0043370", "GO:0046638", "GO:2000516")
query_1	FALSE	1	52	56	2	0.0357143	0.0384615	GO:0043392	GO:BP	negative regulation of DNA binding	21100	12287	c("GO:0051100", "GO:0051101")
query_1	FALSE	1	49	56	1	0.0178571	0.0204082	GO:0043303	GO:BP	mast cell degranulation	21100	12232	c("GO:0002279", "GO:0002448", "GO:0032418", "GO:0043299", "GO:0051656")
query_1	FALSE	1	770	56	2	0.0357143	0.0025974	GO:0043549	GO:BP	regulation of kinase activity	21100	12396	c("GO:0042325", "GO:0051338")
query_1	FALSE	1	1167	56	4	0.0714286	0.00342759	GO:0043603	GO:BP	cellular amide metabolic process	21100	12432	GO:0034641
query_1	FALSE	1	867	56	3	0.0535714	0.00346021	GO:0043604	GO:BP	amide biosynthetic process	21100	12433	c("GO:0043603", "GO:0044271")
query_1	FALSE	1	12674	56	38	0.678571	0.00299826	GO:0044238	GO:BP	primary metabolic process	21100	12685	GO:0008152
query_1	FALSE	1	221	56	1	0.0178571	0.00452489	GO:0044242	GO:BP	cellular lipid catabolic process	21100	12688	c("GO:0016042", "GO:0044248", "GO:0044255")
query_1	FALSE	1	2199	56	12	0.214286	0.00545703	GO:0044248	GO:BP	cellular catabolic process	21100	12691	c("GO:0009056", "GO:0044237")
query_1	FALSE	1	5700	56	23	0.410714	0.00403509	GO:0044249	GO:BP	cellular biosynthetic process	21100	12692	c("GO:0009058", "GO:0044237")
query_1	FALSE	1	1009	56	2	0.0357143	0.00198216	GO:0044255	GO:BP	cellular lipid metabolic process	21100	12695	c("GO:0006629", "GO:0044237")
query_1	FALSE	1	833	56	7	0.125	0.00840336	GO:0044257	GO:BP	cellular protein catabolic process	21100	12697	c("GO:0030163", "GO:0044265", "GO:0044267")
query_1	FALSE	1	12865	56	41	0.732143	0.00318694	GO:0044237	GO:BP	cellular metabolic process	21100	12684	c("GO:0008152", "GO:0009987")
query_1	FALSE	1	5766	56	23	0.410714	0.0039889	GO:0044260	GO:BP	cellular macromolecule metabolic process	21100	12699	c("GO:0043170", "GO:0044237")
query_1	FALSE	1	96	56	2	0.0357143	0.0208333	GO:0044264	GO:BP	cellular polysaccharide metabolic process	21100	12701	c("GO:0005976", "GO:0044260", "GO:0044262")
query_1	FALSE	1	1152	56	7	0.125	0.00607639	GO:0044265	GO:BP	cellular macromolecule catabolic process	21100	12702	c("GO:0009057", "GO:0044248", "GO:0044260")
query_1	FALSE	1	4882	56	19	0.339286	0.00389185	GO:0044267	GO:BP	cellular protein metabolic process	21100	12703	c("GO:0019538", "GO:0044260")
query_1	FALSE	1	487	56	1	0.0178571	0.00205339	GO:0044270	GO:BP	cellular nitrogen compound catabolic process	21100	12705	c("GO:0034641", "GO:0044248")
query_1	FALSE	1	4765	56	19	0.339286	0.00398741	GO:0044271	GO:BP	cellular nitrogen compound biosynthetic process	21100	12706	c("GO:0034641", "GO:0044249")
query_1	FALSE	1	152	56	4	0.0714286	0.0263158	GO:0044272	GO:BP	sulfur compound biosynthetic process	21100	12707	c("GO:0006790", "GO:0044249")
query_1	FALSE	1	285	56	2	0.0357143	0.00701754	GO:0044262	GO:BP	cellular carbohydrate metabolic process	21100	12700	c("GO:0005975", "GO:0044237")
query_1	FALSE	1	21	56	1	0.0178571	0.047619	GO:0044154	GO:BP	histone H3-K14 acetylation	21100	12673	GO:0043966
query_1	FALSE	1	136	56	1	0.0178571	0.00735294	GO:0044106	GO:BP	cellular amine metabolic process	21100	12637	c("GO:0009308", "GO:0034641")
query_1	FALSE	1	1556	56	4	0.0714286	0.00257069	GO:0044093	GO:BP	positive regulation of molecular function	21100	12634	GO:0065009
query_1	FALSE	1	69	56	1	0.0178571	0.0144928	GO:0043618	GO:BP	regulation of transcription from RNA polymerase II promoter in response to stress	21100	12446	c("GO:0006357", "GO:0043620")
query_1	FALSE	1	11	56	1	0.0178571	0.0909091	GO:0043619	GO:BP	regulation of transcription from RNA polymerase II promoter in response to oxidative stress	21100	12447	c("GO:0034599", "GO:0043618")
query_1	FALSE	1	75	56	1	0.0178571	0.0133333	GO:0043620	GO:BP	regulation of DNA-templated transcription in response to stress	21100	12448	c("GO:0006355", "GO:0033554")
query_1	FALSE	1	70	56	2	0.0357143	0.0285714	GO:0043627	GO:BP	response to estrogen	21100	12450	GO:0009725
query_1	FALSE	1	697	56	7	0.125	0.010043	GO:0043632	GO:BP	modification-dependent macromolecule catabolic process	21100	12455	GO:0044265
query_1	FALSE	1	93	56	3	0.0535714	0.0322581	GO:0043648	GO:BP	dicarboxylic acid metabolic process	21100	12471	GO:0019752
query_1	FALSE	1	3395	56	3	0.0535714	0.000883652	GO:0043933	GO:BP	protein-containing complex organization	21100	12512	GO:0016043
query_1	FALSE	1	73	56	1	0.0178571	0.0136986	GO:0043966	GO:BP	histone H3 acetylation	21100	12538	GO:0016573
query_1	FALSE	1	73	56	2	0.0357143	0.0273973	GO:0044042	GO:BP	glucan metabolic process	21100	12587	GO:0005976
query_1	FALSE	1	4834	56	4	0.0714286	0.000827472	GO:0044085	GO:BP	cellular component biogenesis	21100	12627	GO:0071840
query_1	FALSE	1	946	56	2	0.0357143	0.00211416	GO:0044087	GO:BP	regulation of cellular component biogenesis	21100	12628	c("GO:0044085", "GO:0050794")
query_1	FALSE	1	50	56	1	0.0178571	0.02	GO:0044088	GO:BP	regulation of vacuole organization	21100	12629	c("GO:0007033", "GO:0033043")
query_1	FALSE	1	497	56	2	0.0357143	0.00402414	GO:0044089	GO:BP	positive regulation of cellular component biogenesis	21100	12630	c("GO:0044085", "GO:0044087", "GO:0048522")
query_1	FALSE	1	21	56	1	0.0178571	0.047619	GO:0044090	GO:BP	positive regulation of vacuole organization	21100	12631	c("GO:0007033", "GO:0010638", "GO:0044088")
query_1	FALSE	1	1112	56	6	0.107143	0.00539568	GO:0044092	GO:BP	negative regulation of molecular function	21100	12633	GO:0065009
query_1	FALSE	1	388	56	1	0.0178571	0.00257732	GO:0044282	GO:BP	small molecule catabolic process	21100	12713	c("GO:0009056", "GO:0044281")
query_1	FALSE	1	57	56	2	0.0357143	0.0350877	GO:0046148	GO:BP	pigment biosynthetic process	21100	13848	GO:0042440
query_1	FALSE	1	11	56	1	0.0178571	0.0909091	GO:0046149	GO:BP	pigment catabolic process	21100	13849	GO:0042440
query_1	FALSE	1	46	56	1	0.0178571	0.0217391	GO:0046189	GO:BP	phenol-containing compound biosynthetic process	21100	13889	c("GO:0018958", "GO:0019438", "GO:1901362", "GO:1901617")
query_1	FALSE	1	435	56	2	0.0357143	0.0045977	GO:0048732	GO:BP	gland development	21100	15032	GO:0048513
query_1	FALSE	1	178	56	1	0.0178571	0.00561798	GO:0048736	GO:BP	appendage development	21100	15036	c("GO:0007275", "GO:0048856")
query_1	FALSE	1	215	56	1	0.0178571	0.00465116	GO:0048738	GO:BP	cardiac muscle tissue development	21100	15038	c("GO:0007507", "GO:0014706")
query_1	FALSE	1	23	56	1	0.0178571	0.0434783	GO:0048745	GO:BP	smooth muscle tissue development	21100	15044	GO:0060537
query_1	FALSE	1	235	56	1	0.0178571	0.00425532	GO:0048762	GO:BP	mesenchymal cell differentiation	21100	15058	c("GO:0030154", "GO:0060485")
query_1	FALSE	1	623	56	2	0.0357143	0.00321027	GO:0048812	GO:BP	neuron projection morphogenesis	21100	15103	c("GO:0031175", "GO:0120039")
query_1	FALSE	1	4313	56	11	0.196429	0.00255043	GO:0048731	GO:BP	system development	21100	15031	c("GO:0007275", "GO:0048856")
query_1	FALSE	1	5754	56	20	0.357143	0.00347584	GO:0048856	GO:BP	anatomical structure development	21100	15146	GO:0032502
query_1	FALSE	1	231	56	1	0.0178571	0.004329	GO:0048863	GO:BP	stem cell differentiation	21100	15152	GO:0030154
query_1	FALSE	1	4184	56	15	0.267857	0.00358509	GO:0048869	GO:BP	cellular developmental process	21100	15158	c("GO:0009987", "GO:0032502")
query_1	FALSE	1	1655	56	7	0.125	0.00422961	GO:0048870	GO:BP	cell motility	21100	15159	c("GO:0006928", "GO:0040011", "GO:0051674")
query_1	FALSE	1	535	56	2	0.0357143	0.00373832	GO:0048871	GO:BP	multicellular organismal homeostasis	21100	15160	c("GO:0032501", "GO:0042592")
query_1	FALSE	1	290	56	3	0.0535714	0.0103448	GO:0048872	GO:BP	homeostasis of number of cells	21100	15161	GO:0042592
query_1	FALSE	1	1023	56	9	0.160714	0.00879765	GO:0048878	GO:BP	chemical homeostasis	21100	15167	GO:0042592
query_1	FALSE	1	642	56	2	0.0357143	0.00311526	GO:0048858	GO:BP	cell projection morphogenesis	21100	15148	c("GO:0000902", "GO:0030030", "GO:0032990")
query_1	FALSE	1	400	56	1	0.0178571	0.0025	GO:0048880	GO:BP	sensory system development	21100	15168	GO:0048731
query_1	FALSE	1	640	56	1	0.0178571	0.0015625	GO:0048729	GO:BP	tissue morphogenesis	21100	15029	c("GO:0009653", "GO:0009888")
query_1	FALSE	1	1436	56	2	0.0357143	0.00139276	GO:0048699	GO:BP	generation of neurons	21100	14999	GO:0022008
query_1	FALSE	1	163	56	1	0.0178571	0.00613497	GO:0048639	GO:BP	positive regulation of developmental growth	21100	14940	c("GO:0045927", "GO:0048589", "GO:0048638", "GO:0051094")
query_1	FALSE	1	105	56	1	0.0178571	0.00952381	GO:0048640	GO:BP	negative regulation of developmental growth	21100	14941	c("GO:0045926", "GO:0048589", "GO:0048638", "GO:0051093")
query_1	FALSE	1	66	56	1	0.0178571	0.0151515	GO:0048645	GO:BP	animal organ formation	21100	14946	c("GO:0009887", "GO:0048646")
query_1	FALSE	1	1134	56	3	0.0535714	0.0026455	GO:0048646	GO:BP	anatomical structure formation involved in morphogenesis	21100	14947	c("GO:0009653", "GO:0032502")
query_1	FALSE	1	142	56	1	0.0178571	0.00704225	GO:0048659	GO:BP	smooth muscle cell proliferation	21100	14960	GO:0033002
query_1	FALSE	1	137	56	1	0.0178571	0.00729927	GO:0048660	GO:BP	regulation of smooth muscle cell proliferation	21100	14961	c("GO:0042127", "GO:0048659")
query_1	FALSE	1	231	56	1	0.0178571	0.004329	GO:0048705	GO:BP	skeletal system morphogenesis	21100	15005	c("GO:0001501", "GO:0009887")
query_1	FALSE	1	82	56	1	0.0178571	0.0121951	GO:0048661	GO:BP	positive regulation of smooth muscle cell proliferation	21100	14962	c("GO:0008284", "GO:0048659", "GO:0048660")
query_1	FALSE	1	1108	56	2	0.0357143	0.00180505	GO:0048666	GO:BP	neuron development	21100	14967	c("GO:0030182", "GO:0048468")
query_1	FALSE	1	564	56	2	0.0357143	0.0035461	GO:0048667	GO:BP	cell morphogenesis involved in neuron differentiation	21100	14968	c("GO:0000904", "GO:0048666")
query_1	FALSE	1	26	56	1	0.0178571	0.0384615	GO:0048668	GO:BP	collateral sprouting	21100	14969	c("GO:0007409", "GO:0048588", "GO:0060560")
query_1	FALSE	1	20	56	1	0.0178571	0.05	GO:0048670	GO:BP	regulation of collateral sprouting	21100	14971	c("GO:0048638", "GO:0048668", "GO:0050770", "GO:0061387")
query_1	FALSE	1	10	56	1	0.0178571	0.1	GO:0048671	GO:BP	negative regulation of collateral sprouting	21100	14972	c("GO:0030308", "GO:0048640", "GO:0048668", "GO:0048670", "GO:0050771")
query_1	FALSE	1	125	56	1	0.0178571	0.008	GO:0048675	GO:BP	axon extension	21100	14976	c("GO:0007409", "GO:1990138")
query_1	FALSE	1	52	56	1	0.0178571	0.0192308	GO:0048662	GO:BP	negative regulation of smooth muscle cell proliferation	21100	14963	c("GO:0008285", "GO:0048659", "GO:0048660")
query_1	FALSE	1	163	56	1	0.0178571	0.00613497	GO:0050657	GO:BP	nucleic acid transport	21100	15249	GO:0015931
query_1	FALSE	1	163	56	1	0.0178571	0.00613497	GO:0050658	GO:BP	RNA transport	21100	15250	c("GO:0050657", "GO:0051236")
query_1	FALSE	1	231	56	1	0.0178571	0.004329	GO:0050670	GO:BP	regulation of lymphocyte proliferation	21100	15256	c("GO:0032944", "GO:0046651", "GO:0051249")
query_1	FALSE	1	148	56	1	0.0178571	0.00675676	GO:0050796	GO:BP	regulation of insulin secretion	21100	15327	c("GO:0030073", "GO:0050708", "GO:0090276")
query_1	FALSE	1	610	56	4	0.0714286	0.00655738	GO:0050801	GO:BP	ion homeostasis	21100	15330	GO:0048878
query_1	FALSE	1	441	56	2	0.0357143	0.00453515	GO:0050804	GO:BP	modulation of chemical synaptic transmission	21100	15333	c("GO:0007268", "GO:0099177")
query_1	FALSE	1	167	56	1	0.0178571	0.00598802	GO:0050806	GO:BP	positive regulation of synaptic transmission	21100	15335	c("GO:0007268", "GO:0010647", "GO:0023056", "GO:0050804")
query_1	FALSE	1	206	56	2	0.0357143	0.00970874	GO:0050807	GO:BP	regulation of synapse organization	21100	15336	c("GO:0050803", "GO:0050808", "GO:0051128")
query_1	FALSE	1	424	56	2	0.0357143	0.00471698	GO:0050808	GO:BP	synapse organization	21100	15337	GO:0034330
query_1	FALSE	1	11193	56	42	0.75	0.00375235	GO:0050794	GO:BP	regulation of cellular process	21100	15325	c("GO:0009987", "GO:0050789")
query_1	FALSE	1	231	56	1	0.0178571	0.004329	GO:0050817	GO:BP	coagulation	21100	15342	GO:0032501
query_1	FALSE	1	9	56	1	0.0178571	0.111111	GO:0050847	GO:BP	progesterone receptor signaling pathway	21100	15366	GO:0030518
query_1	FALSE	1	342	56	1	0.0178571	0.00292398	GO:0050863	GO:BP	regulation of T cell activation	21100	15382	c("GO:0042110", "GO:0051249")
query_1	FALSE	1	198	56	1	0.0178571	0.00505051	GO:0050864	GO:BP	regulation of B cell activation	21100	15383	c("GO:0042113", "GO:0051249")
query_1	FALSE	1	671	56	6	0.107143	0.00894188	GO:0050865	GO:BP	regulation of cell activation	21100	15384	c("GO:0001775", "GO:0050794")
query_1	FALSE	1	211	56	2	0.0357143	0.00947867	GO:0050866	GO:BP	negative regulation of cell activation	21100	15385	c("GO:0001775", "GO:0048523", "GO:0050865")
query_1	FALSE	1	430	56	3	0.0535714	0.00697674	GO:0050867	GO:BP	positive regulation of cell activation	21100	15386	c("GO:0001775", "GO:0048522", "GO:0050865")
query_1	FALSE	1	191	56	2	0.0357143	0.0104712	GO:0050821	GO:BP	protein stabilization	21100	15346	GO:0031647
query_1	FALSE	1	2425	56	9	0.160714	0.00371134	GO:0050793	GO:BP	regulation of developmental process	21100	15324	c("GO:0032502", "GO:0050789")
query_1	FALSE	1	2345	56	6	0.107143	0.00255864	GO:0050790	GO:BP	regulation of catalytic activity	21100	15322	GO:0065009
query_1	FALSE	1	12276	56	44	0.785714	0.00358423	GO:0050789	GO:BP	regulation of biological process	21100	15321	c("GO:0008150", "GO:0065007")
query_1	FALSE	1	141	56	1	0.0178571	0.0070922	GO:0050671	GO:BP	positive regulation of lymphocyte proliferation	21100	15257	c("GO:0032946", "GO:0046651", "GO:0050670", "GO:0051251")
query_1	FALSE	1	402	56	1	0.0178571	0.00248756	GO:0050673	GO:BP	epithelial cell proliferation	21100	15259	GO:0008283
query_1	FALSE	1	339	56	1	0.0178571	0.00294985	GO:0050678	GO:BP	regulation of epithelial cell proliferation	21100	15264	c("GO:0042127", "GO:0050673")
query_1	FALSE	1	194	56	1	0.0178571	0.00515464	GO:0050679	GO:BP	positive regulation of epithelial cell proliferation	21100	15265	c("GO:0008284", "GO:0050673", "GO:0050678")
query_1	FALSE	1	243	56	1	0.0178571	0.00411523	GO:0050708	GO:BP	regulation of protein secretion	21100	15275	c("GO:0009306", "GO:0051223", "GO:1903530")
query_1	FALSE	1	127	56	1	0.0178571	0.00787402	GO:0050714	GO:BP	positive regulation of protein secretion	21100	15277	c("GO:0009306", "GO:0050708", "GO:0051222", "GO:1903532")
query_1	FALSE	1	18	56	1	0.0178571	0.0555556	GO:0050746	GO:BP	regulation of lipoprotein metabolic process	21100	15291	c("GO:0031323", "GO:0042157", "GO:0051246")
query_1	FALSE	1	357	56	2	0.0357143	0.00560224	GO:0050767	GO:BP	regulation of neurogenesis	21100	15304	c("GO:0022008", "GO:0051960", "GO:0060284")
query_1	FALSE	1	137	56	1	0.0178571	0.00729927	GO:0050768	GO:BP	negative regulation of neurogenesis	21100	15305	c("GO:0010721", "GO:0022008", "GO:0050767", "GO:0051961")
query_1	FALSE	1	221	56	1	0.0178571	0.00452489	GO:0050769	GO:BP	positive regulation of neurogenesis	21100	15306	c("GO:0010720", "GO:0022008", "GO:0050767", "GO:0051962")
query_1	FALSE	1	156	56	1	0.0178571	0.00641026	GO:0050770	GO:BP	regulation of axonogenesis	21100	15307	c("GO:0007409", "GO:0010975", "GO:0022603")
query_1	FALSE	1	65	56	1	0.0178571	0.0153846	GO:0050771	GO:BP	negative regulation of axonogenesis	21100	15308	c("GO:0007409", "GO:0010977", "GO:0050768", "GO:0050770")
query_1	FALSE	1	903	56	3	0.0535714	0.00332226	GO:0050776	GO:BP	regulation of immune response	21100	15313	c("GO:0002682", "GO:0006955", "GO:0048583")
query_1	FALSE	1	183	56	1	0.0178571	0.00546448	GO:0050777	GO:BP	negative regulation of immune response	21100	15314	c("GO:0002683", "GO:0006955", "GO:0048585", "GO:0050776")
query_1	FALSE	1	600	56	1	0.0178571	0.00166667	GO:0050778	GO:BP	positive regulation of immune response	21100	15315	c("GO:0002684", "GO:0006955", "GO:0048584", "GO:0050776")
query_1	FALSE	1	319	56	2	0.0357143	0.00626959	GO:0048638	GO:BP	regulation of developmental growth	21100	14939	c("GO:0040008", "GO:0048589", "GO:0050793")
query_1	FALSE	1	876	56	2	0.0357143	0.00228311	GO:0048609	GO:BP	multicellular organismal reproductive process	21100	14911	c("GO:0022414", "GO:0032504")
query_1	FALSE	1	436	56	1	0.0178571	0.00229358	GO:0048608	GO:BP	reproductive structure development	21100	14910	c("GO:0003006", "GO:0048856", "GO:0061458")
query_1	FALSE	1	609	56	2	0.0357143	0.00328407	GO:0048598	GO:BP	embryonic morphogenesis	21100	14906	c("GO:0009653", "GO:0009790")
query_1	FALSE	1	158	56	1	0.0178571	0.00632911	GO:0046631	GO:BP	alpha-beta T cell activation	21100	14247	GO:0042110
query_1	FALSE	1	112	56	1	0.0178571	0.00892857	GO:0046632	GO:BP	alpha-beta T cell differentiation	21100	14248	c("GO:0030217", "GO:0046631")
query_1	FALSE	1	103	56	1	0.0178571	0.00970874	GO:0046634	GO:BP	regulation of alpha-beta T cell activation	21100	14250	c("GO:0046631", "GO:0050863")
query_1	FALSE	1	67	56	1	0.0178571	0.0149254	GO:0046635	GO:BP	positive regulation of alpha-beta T cell activation	21100	14251	c("GO:0046631", "GO:0046634", "GO:0050870")
query_1	FALSE	1	66	56	1	0.0178571	0.0151515	GO:0046637	GO:BP	regulation of alpha-beta T cell differentiation	21100	14253	c("GO:0045580", "GO:0046632", "GO:0046634")
query_1	FALSE	1	49	56	1	0.0178571	0.0204082	GO:0046638	GO:BP	positive regulation of alpha-beta T cell differentiation	21100	14254	c("GO:0045582", "GO:0046632", "GO:0046635", "GO:0046637")
query_1	FALSE	1	43	56	1	0.0178571	0.0232558	GO:0046622	GO:BP	positive regulation of organ growth	21100	14241	c("GO:0035265", "GO:0046620", "GO:0048639", "GO:0051240")
query_1	FALSE	1	794	56	2	0.0357143	0.00251889	GO:0046649	GO:BP	lymphocyte activation	21100	14265	GO:0045321
query_1	FALSE	1	165	56	1	0.0178571	0.00606061	GO:0046661	GO:BP	male sex differentiation	21100	14273	c("GO:0007275", "GO:0007548")
query_1	FALSE	1	31	56	2	0.0357143	0.0645161	GO:0046685	GO:BP	response to arsenic-containing substance	21100	14295	GO:0042221
query_1	FALSE	1	58	56	2	0.0357143	0.0344828	GO:0046686	GO:BP	response to cadmium ion	21100	14296	GO:0010038
query_1	FALSE	1	481	56	1	0.0178571	0.002079	GO:0046700	GO:BP	heterocycle catabolic process	21100	14305	c("GO:0044248", "GO:0046483")
query_1	FALSE	1	227	56	2	0.0357143	0.00881057	GO:0046777	GO:BP	protein autophosphorylation	21100	14353	GO:0006468
query_1	FALSE	1	108	56	1	0.0178571	0.00925926	GO:0046822	GO:BP	regulation of nucleocytoplasmic transport	21100	14379	c("GO:0006913", "GO:0032386")
query_1	FALSE	1	298	56	1	0.0178571	0.0033557	GO:0046651	GO:BP	lymphocyte proliferation	21100	14266	c("GO:0032943", "GO:0046649")
query_1	FALSE	1	87	56	1	0.0178571	0.0114943	GO:0046620	GO:BP	regulation of organ growth	21100	14239	c("GO:0035265", "GO:0048638", "GO:0051239")
query_1	FALSE	1	191	56	1	0.0178571	0.0052356	GO:0046578	GO:BP	regulation of Ras protein signal transduction	21100	14211	c("GO:0007265", "GO:0051056")
query_1	FALSE	1	142	56	1	0.0178571	0.00704225	GO:0046546	GO:BP	development of primary male sexual characteristics	21100	14205	c("GO:0045137", "GO:0046661")
query_1	FALSE	1	33	56	1	0.0178571	0.030303	GO:0046320	GO:BP	regulation of fatty acid oxidation	21100	14019	c("GO:0019217", "GO:0019395")
query_1	FALSE	1	16	56	1	0.0178571	0.0625	GO:0046321	GO:BP	positive regulation of fatty acid oxidation	21100	14020	c("GO:0019395", "GO:0045923", "GO:0046320")
query_1	FALSE	1	71	56	1	0.0178571	0.0140845	GO:0046323	GO:BP	glucose import	21100	14022	GO:1904659
query_1	FALSE	1	55	56	1	0.0178571	0.0181818	GO:0046324	GO:BP	regulation of glucose import	21100	14023	c("GO:0010827", "GO:0046323")
query_1	FALSE	1	36	56	1	0.0178571	0.0277778	GO:0046326	GO:BP	positive regulation of glucose import	21100	14025	c("GO:0010828", "GO:0046323", "GO:0046324")
query_1	FALSE	1	140	56	2	0.0357143	0.0142857	GO:0046328	GO:BP	regulation of JNK cascade	21100	14027	c("GO:0007254", "GO:0032872")
query_1	FALSE	1	95	56	2	0.0357143	0.0210526	GO:0046330	GO:BP	positive regulation of JNK cascade	21100	14029	c("GO:0007254", "GO:0032874", "GO:0046328")
query_1	FALSE	1	29	56	1	0.0178571	0.0344828	GO:0046337	GO:BP	phosphatidylethanolamine metabolic process	21100	14035	GO:0006650
query_1	FALSE	1	239	56	1	0.0178571	0.0041841	GO:0046395	GO:BP	carboxylic acid catabolic process	21100	14090	c("GO:0016054", "GO:0019752")
query_1	FALSE	1	77	56	1	0.0178571	0.012987	GO:0046470	GO:BP	phosphatidylcholine metabolic process	21100	14150	c("GO:0006650", "GO:1901564")
query_1	FALSE	1	41	56	1	0.0178571	0.0243902	GO:0046473	GO:BP	phosphatidic acid metabolic process	21100	14152	GO:0006650
query_1	FALSE	1	218	56	1	0.0178571	0.00458716	GO:0046474	GO:BP	glycerophospholipid biosynthetic process	21100	14153	c("GO:0006650", "GO:0008654", "GO:0045017")
query_1	FALSE	1	8165	56	21	0.375	0.00257195	GO:0046483	GO:BP	heterocycle metabolic process	21100	14160	GO:0044237
query_1	FALSE	1	399	56	1	0.0178571	0.00250627	GO:0046486	GO:BP	glycerolipid metabolic process	21100	14163	GO:0044255
query_1	FALSE	1	12	56	1	0.0178571	0.0833333	GO:0046501	GO:BP	protoporphyrinogen IX metabolic process	21100	14177	GO:0006778
query_1	FALSE	1	32	56	1	0.0178571	0.03125	GO:0046825	GO:BP	regulation of protein export from nucleus	21100	14382	c("GO:0006611", "GO:0033157", "GO:0046822")
query_1	FALSE	1	96	56	1	0.0178571	0.0104167	GO:0043255	GO:BP	regulation of carbohydrate biosynthetic process	21100	12208	c("GO:0006109", "GO:0009889", "GO:0016051")
query_1	FALSE	1	286	56	2	0.0357143	0.00699301	GO:0046879	GO:BP	hormone secretion	21100	14418	c("GO:0009914", "GO:0023061")
query_1	FALSE	1	123	56	1	0.0178571	0.00813008	GO:0046887	GO:BP	positive regulation of hormone secretion	21100	14426	c("GO:0010647", "GO:0023056", "GO:0046879", "GO:0046883", "GO:1903532")
query_1	FALSE	1	3513	56	14	0.25	0.0039852	GO:0048513	GO:BP	animal organ development	21100	14835	GO:0048856
query_1	FALSE	1	613	56	1	0.0178571	0.00163132	GO:0048514	GO:BP	blood vessel morphogenesis	21100	14836	c("GO:0001568", "GO:0035239")
query_1	FALSE	1	6224	56	21	0.375	0.00337404	GO:0048518	GO:BP	positive regulation of biological process	21100	14840	c("GO:0008150", "GO:0050789")
query_1	FALSE	1	5876	56	26	0.464286	0.00442478	GO:0048519	GO:BP	negative regulation of biological process	21100	14841	c("GO:0008150", "GO:0050789")
query_1	FALSE	1	5687	56	21	0.375	0.00369263	GO:0048522	GO:BP	positive regulation of cellular process	21100	14844	c("GO:0009987", "GO:0048518", "GO:0050794")
query_1	FALSE	1	4856	56	24	0.428571	0.00494234	GO:0048523	GO:BP	negative regulation of cellular process	21100	14845	c("GO:0009987", "GO:0048519", "GO:0050794")
query_1	FALSE	1	302	56	1	0.0178571	0.00331126	GO:0048511	GO:BP	rhythmic process	21100	14833	GO:0008150
query_1	FALSE	1	938	56	3	0.0535714	0.00319829	GO:0048534	GO:BP	hematopoietic or lymphoid organ development	21100	14854	c("GO:0002520", "GO:0048513")
query_1	FALSE	1	455	56	1	0.0178571	0.0021978	GO:0048568	GO:BP	embryonic organ development	21100	14880	c("GO:0009790", "GO:0048513")
query_1	FALSE	1	3895	56	18	0.321429	0.00462131	GO:0048583	GO:BP	regulation of response to stimulus	21100	14895	c("GO:0050789", "GO:0050896")
query_1	FALSE	1	2169	56	9	0.160714	0.00414938	GO:0048584	GO:BP	positive regulation of response to stimulus	21100	14896	c("GO:0048518", "GO:0048583", "GO:0050896")
query_1	FALSE	1	1599	56	6	0.107143	0.00375235	GO:0048585	GO:BP	negative regulation of response to stimulus	21100	14897	c("GO:0048519", "GO:0048583", "GO:0050896")
query_1	FALSE	1	220	56	1	0.0178571	0.00454545	GO:0048588	GO:BP	developmental cell growth	21100	14900	c("GO:0016049", "GO:0048468", "GO:0048589")
query_1	FALSE	1	639	56	3	0.0535714	0.00469484	GO:0048589	GO:BP	developmental growth	21100	14901	c("GO:0032502", "GO:0040007")
query_1	FALSE	1	332	56	1	0.0178571	0.00301205	GO:0048545	GO:BP	response to steroid hormone	21100	14865	c("GO:0009725", "GO:0014070", "GO:0033993")
query_1	FALSE	1	103	56	1	0.0178571	0.00970874	GO:0048477	GO:BP	oogenesis	21100	14808	c("GO:0007281", "GO:0007292")
query_1	FALSE	1	2094	56	4	0.0714286	0.00191022	GO:0048468	GO:BP	cell development	21100	14805	c("GO:0030154", "GO:0048856", "GO:0048869")
query_1	FALSE	1	73	56	1	0.0178571	0.0136986	GO:0048332	GO:BP	mesoderm morphogenesis	21100	14705	c("GO:0007498", "GO:0048729")
query_1	FALSE	1	63	56	2	0.0357143	0.031746	GO:0046902	GO:BP	regulation of mitochondrial membrane permeability	21100	14440	c("GO:0006839", "GO:0007006", "GO:0090559")
query_1	FALSE	1	923	56	3	0.0535714	0.00325027	GO:0046903	GO:BP	secretion	21100	14441	GO:0006810
query_1	FALSE	1	1766	56	6	0.107143	0.00339751	GO:0046907	GO:BP	intracellular transport	21100	14442	c("GO:0006810", "GO:0051641", "GO:0051649")
query_1	FALSE	1	111	56	1	0.0178571	0.00900901	GO:0046916	GO:BP	cellular transition metal ion homeostasis	21100	14445	c("GO:0006875", "GO:0055076")
query_1	FALSE	1	281	56	2	0.0357143	0.00711744	GO:0046942	GO:BP	carboxylic acid transport	21100	14458	GO:0015711
query_1	FALSE	1	56	56	1	0.0178571	0.0178571	GO:0048008	GO:BP	platelet-derived growth factor receptor signaling pathway	21100	14487	GO:0007169
query_1	FALSE	1	14	56	1	0.0178571	0.0714286	GO:0048021	GO:BP	regulation of melanin biosynthetic process	21100	14497	c("GO:0031326", "GO:0042438", "GO:1900376")
query_1	FALSE	1	10	56	1	0.0178571	0.1	GO:0048102	GO:BP	autophagic cell death	21100	14554	GO:0012501
query_1	FALSE	1	82	56	1	0.0178571	0.0121951	GO:0048144	GO:BP	fibroblast proliferation	21100	14573	GO:0008283
query_1	FALSE	1	80	56	1	0.0178571	0.0125	GO:0048145	GO:BP	regulation of fibroblast proliferation	21100	14574	c("GO:0042127", "GO:0048144")
query_1	FALSE	1	30	56	1	0.0178571	0.0333333	GO:0048147	GO:BP	negative regulation of fibroblast proliferation	21100	14576	c("GO:0008285", "GO:0048144", "GO:0048145")
query_1	FALSE	1	205	56	1	0.0178571	0.00487805	GO:0048167	GO:BP	regulation of synaptic plasticity	21100	14592	c("GO:0050804", "GO:0065008")
query_1	FALSE	1	592	56	1	0.0178571	0.00168919	GO:0048232	GO:BP	male gamete generation	21100	14628	GO:0007276
query_1	FALSE	1	500	56	3	0.0535714	0.006	GO:0048285	GO:BP	organelle fission	21100	14662	GO:0006996
query_1	FALSE	1	46	56	2	0.0357143	0.0434783	GO:0048286	GO:BP	lung alveolus development	21100	14663	c("GO:0030324", "GO:0048856")
query_1	FALSE	1	236	56	1	0.0178571	0.00423729	GO:0046883	GO:BP	regulation of hormone secretion	21100	14422	c("GO:0010646", "GO:0010817", "GO:0023051", "GO:0046879", "GO:1903530")
query_1	FALSE	1	402	56	2	0.0357143	0.00497512	GO:0043254	GO:BP	regulation of protein-containing complex assembly	21100	12207	c("GO:0044087", "GO:0051128", "GO:0065003")
query_1	FALSE	1	1509	56	4	0.0714286	0.00265076	GO:0043207	GO:BP	response to external biotic stimulus	21100	12195	c("GO:0009605", "GO:0009607")
query_1	FALSE	1	119	56	2	0.0357143	0.0168067	GO:0043200	GO:BP	response to amino acid	21100	12193	c("GO:0001101", "GO:0010243", "GO:1901700")
query_1	FALSE	1	69	56	1	0.0178571	0.0144928	GO:0032722	GO:BP	positive regulation of chemokine production	21100	8967	c("GO:0001819", "GO:0032602", "GO:0032642")
query_1	FALSE	1	5	56	1	0.0178571	0.2	GO:0032762	GO:BP	mast cell cytokine production	21100	9007	GO:0061082
query_1	FALSE	1	5	56	1	0.0178571	0.2	GO:0032763	GO:BP	regulation of mast cell cytokine production	21100	9008	c("GO:0002718", "GO:0032762")
query_1	FALSE	1	2	56	1	0.0178571	0.5	GO:0032764	GO:BP	negative regulation of mast cell cytokine production	21100	9009	c("GO:0002719", "GO:0032762", "GO:0032763")
query_1	FALSE	1	3600	56	16	0.285714	0.00444444	GO:0032774	GO:BP	RNA biosynthetic process	21100	9017	c("GO:0009059", "GO:0016070", "GO:0034654")
query_1	FALSE	1	597	56	1	0.0178571	0.00167504	GO:0032787	GO:BP	monocarboxylic acid metabolic process	21100	9026	GO:0019752
query_1	FALSE	1	93	56	1	0.0178571	0.0107527	GO:0032642	GO:BP	regulation of chemokine production	21100	8887	c("GO:0001817", "GO:0032602")
query_1	FALSE	1	253	56	2	0.0357143	0.00790514	GO:0032868	GO:BP	response to insulin	21100	9070	GO:0043434
query_1	FALSE	1	582	56	4	0.0714286	0.00687285	GO:0032870	GO:BP	cellular response to hormone stimulus	21100	9072	c("GO:0009725", "GO:0071310", "GO:0071495")
query_1	FALSE	1	192	56	3	0.0535714	0.015625	GO:0032872	GO:BP	regulation of stress-activated MAPK cascade	21100	9074	c("GO:0043408", "GO:0051403", "GO:0070302")
query_1	FALSE	1	128	56	2	0.0357143	0.015625	GO:0032874	GO:BP	positive regulation of stress-activated MAPK cascade	21100	9076	c("GO:0032872", "GO:0043410", "GO:0051403", "GO:0070304")
query_1	FALSE	1	2725	56	13	0.232143	0.00477064	GO:0032879	GO:BP	regulation of localization	21100	9081	c("GO:0050789", "GO:0051179")
query_1	FALSE	1	845	56	6	0.107143	0.00710059	GO:0032880	GO:BP	regulation of protein localization	21100	9082	c("GO:0008104", "GO:0032879")
query_1	FALSE	1	42	56	1	0.0178571	0.0238095	GO:0032881	GO:BP	regulation of polysaccharide metabolic process	21100	9083	c("GO:0005976", "GO:0006109", "GO:0060255")
query_1	FALSE	1	199	56	2	0.0357143	0.0100503	GO:0032869	GO:BP	cellular response to insulin stimulus	21100	9071	c("GO:0032868", "GO:0071375")
query_1	FALSE	1	36	56	1	0.0178571	0.0277778	GO:0032885	GO:BP	regulation of polysaccharide biosynthetic process	21100	9087	c("GO:0000271", "GO:0010556", "GO:0032881", "GO:0043255")
query_1	FALSE	1	102	56	1	0.0178571	0.00980392	GO:0032606	GO:BP	type I interferon production	21100	8851	GO:0001816
query_1	FALSE	1	38	56	1	0.0178571	0.0263158	GO:0032570	GO:BP	response to progesterone	21100	8834	c("GO:0048545", "GO:1901654")
query_1	FALSE	1	4	56	1	0.0178571	0.25	GO:0032461	GO:BP	positive regulation of protein oligomerization	21100	8768	c("GO:0031334", "GO:0032459", "GO:0051259")
query_1	FALSE	1	4	56	1	0.0178571	0.25	GO:0032462	GO:BP	regulation of protein homooligomerization	21100	8769	c("GO:0032459", "GO:0051260")
query_1	FALSE	1	2	56	1	0.0178571	0.5	GO:0032464	GO:BP	positive regulation of protein homooligomerization	21100	8771	c("GO:0032461", "GO:0032462", "GO:0051260")
query_1	FALSE	1	27	56	1	0.0178571	0.037037	GO:0032469	GO:BP	endoplasmic reticulum calcium ion homeostasis	21100	8776	GO:0006874
query_1	FALSE	1	9	56	1	0.0178571	0.111111	GO:0032471	GO:BP	negative regulation of endoplasmic reticulum calcium ion concentration	21100	8778	GO:0032469
query_1	FALSE	1	102	56	1	0.0178571	0.00980392	GO:0032479	GO:BP	regulation of type I interferon production	21100	8782	c("GO:0001817", "GO:0032606")
query_1	FALSE	1	93	56	1	0.0178571	0.0107527	GO:0032602	GO:BP	chemokine production	21100	8847	GO:0001816
query_1	FALSE	1	31	56	1	0.0178571	0.0322581	GO:0032480	GO:BP	negative regulation of type I interferon production	21100	8783	c("GO:0001818", "GO:0032479", "GO:0032606")
query_1	FALSE	1	7354	56	26	0.464286	0.00353549	GO:0032501	GO:BP	multicellular organismal process	21100	8803	GO:0008150
query_1	FALSE	1	6317	56	26	0.464286	0.00411588	GO:0032502	GO:BP	developmental process	21100	8804	GO:0008150
query_1	FALSE	1	896	56	2	0.0357143	0.00223214	GO:0032504	GO:BP	multicellular organism reproduction	21100	8805	c("GO:0000003", "GO:0032501")
query_1	FALSE	1	31	56	1	0.0178571	0.0322581	GO:0032509	GO:BP	endosome transport via multivesicular body sorting pathway	21100	8810	c("GO:0016197", "GO:0071985")
query_1	FALSE	1	17	56	1	0.0178571	0.0588235	GO:0032511	GO:BP	late endosome to vacuole transport via multivesicular body sorting pathway	21100	8812	c("GO:0032509", "GO:0045324")
query_1	FALSE	1	357	56	2	0.0357143	0.00560224	GO:0032535	GO:BP	regulation of cellular component size	21100	8826	c("GO:0016043", "GO:0090066")
query_1	FALSE	1	324	56	2	0.0357143	0.00617284	GO:0032496	GO:BP	response to lipopolysaccharide	21100	8799	c("GO:0002237", "GO:0033993", "GO:1901700")
query_1	FALSE	1	72	56	1	0.0178571	0.0138889	GO:0032890	GO:BP	regulation of organic acid transport	21100	9092	c("GO:0015849", "GO:0051049")
query_1	FALSE	1	23	56	1	0.0178571	0.0434783	GO:0032891	GO:BP	negative regulation of organic acid transport	21100	9093	c("GO:0015849", "GO:0032890", "GO:0051051")
query_1	FALSE	1	786	56	3	0.0535714	0.00381679	GO:0032940	GO:BP	secretion by cell	21100	9132	c("GO:0046903", "GO:0140352")
query_1	FALSE	1	214	56	1	0.0178571	0.0046729	GO:0033044	GO:BP	regulation of chromosome organization	21100	9206	c("GO:0033043", "GO:0051276")
query_1	FALSE	1	73	56	1	0.0178571	0.0136986	GO:0033143	GO:BP	regulation of intracellular steroid hormone receptor signaling pathway	21100	9270	c("GO:0009966", "GO:0030518")
query_1	FALSE	1	14	56	1	0.0178571	0.0714286	GO:0033145	GO:BP	positive regulation of intracellular steroid hormone receptor signaling pathway	21100	9272	c("GO:0009967", "GO:0030518", "GO:0033143")
query_1	FALSE	1	36	56	1	0.0178571	0.0277778	GO:0033146	GO:BP	regulation of intracellular estrogen receptor signaling pathway	21100	9273	c("GO:0030520", "GO:0033143")
query_1	FALSE	1	13	56	1	0.0178571	0.0769231	GO:0033148	GO:BP	positive regulation of intracellular estrogen receptor signaling pathway	21100	9275	c("GO:0030520", "GO:0033145", "GO:0033146")
query_1	FALSE	1	233	56	2	0.0357143	0.00858369	GO:0033157	GO:BP	regulation of intracellular protein transport	21100	9280	c("GO:0006886", "GO:0032386", "GO:0034613", "GO:0051223")
query_1	FALSE	1	1137	56	6	0.107143	0.00527704	GO:0033043	GO:BP	regulation of organelle organization	21100	9205	c("GO:0006996", "GO:0051128")
query_1	FALSE	1	17	56	1	0.0178571	0.0588235	GO:0033194	GO:BP	response to hydroperoxide	21100	9291	c("GO:0006979", "GO:1901700")
query_1	FALSE	1	55	56	1	0.0178571	0.0181818	GO:0033238	GO:BP	regulation of cellular amine metabolic process	21100	9310	c("GO:0031323", "GO:0044106", "GO:0051171")
query_1	FALSE	1	86	56	1	0.0178571	0.0116279	GO:0033273	GO:BP	response to vitamin	21100	9331	GO:0007584
query_1	FALSE	1	35	56	1	0.0178571	0.0285714	GO:0033280	GO:BP	response to vitamin D	21100	9336	c("GO:0014070", "GO:0033273", "GO:0033993", "GO:1901700")
query_1	FALSE	1	1109	56	6	0.107143	0.00541028	GO:0033365	GO:BP	protein localization to organelle	21100	9400	GO:0034613
query_1	FALSE	1	241	56	4	0.0714286	0.0165975	GO:0033500	GO:BP	carbohydrate homeostasis	21100	9469	GO:0048878
query_1	FALSE	1	226	56	2	0.0357143	0.00884956	GO:0033673	GO:BP	negative regulation of kinase activity	21100	9601	c("GO:0042326", "GO:0043549", "GO:0051348")
query_1	FALSE	1	124	56	1	0.0178571	0.00806452	GO:0033209	GO:BP	tumor necrosis factor-mediated signaling pathway	21100	9296	c("GO:0019221", "GO:0071356")
query_1	FALSE	1	3125	56	11	0.196429	0.00352	GO:0033036	GO:BP	macromolecule localization	21100	9203	GO:0051179
query_1	FALSE	1	28	56	1	0.0178571	0.0357143	GO:0033032	GO:BP	regulation of myeloid cell apoptotic process	21100	9200	c("GO:0033028", "GO:0042981")
query_1	FALSE	1	7	56	1	0.0178571	0.142857	GO:0033029	GO:BP	regulation of neutrophil apoptotic process	21100	9197	c("GO:0001781", "GO:0002682", "GO:0033032", "GO:2000106")
query_1	FALSE	1	302	56	1	0.0178571	0.00331126	GO:0032943	GO:BP	mononuclear cell proliferation	21100	9134	GO:0070661
query_1	FALSE	1	234	56	1	0.0178571	0.0042735	GO:0032944	GO:BP	regulation of mononuclear cell proliferation	21100	9135	c("GO:0032943", "GO:0070663")
query_1	FALSE	1	143	56	1	0.0178571	0.00699301	GO:0032946	GO:BP	positive regulation of mononuclear cell proliferation	21100	9137	c("GO:0032943", "GO:0032944", "GO:0070665")
query_1	FALSE	1	245	56	1	0.0178571	0.00408163	GO:0032984	GO:BP	protein-containing complex disassembly	21100	9170	c("GO:0022411", "GO:0043933")
query_1	FALSE	1	757	56	2	0.0357143	0.00264201	GO:0032989	GO:BP	cellular component morphogenesis	21100	9175	c("GO:0009653", "GO:0016043", "GO:0048869")
query_1	FALSE	1	661	56	2	0.0357143	0.00302572	GO:0032990	GO:BP	cell part morphogenesis	21100	9176	GO:0032989
query_1	FALSE	1	193	56	2	0.0357143	0.0103627	GO:0033002	GO:BP	muscle cell proliferation	21100	9178	GO:0008283
query_1	FALSE	1	44	56	1	0.0178571	0.0227273	GO:0033003	GO:BP	regulation of mast cell activation	21100	9179	c("GO:0002694", "GO:0045576")
query_1	FALSE	1	13	56	1	0.0178571	0.0769231	GO:0033004	GO:BP	negative regulation of mast cell activation	21100	9180	c("GO:0002695", "GO:0033003", "GO:0045576")
query_1	FALSE	1	33	56	1	0.0178571	0.030303	GO:0033006	GO:BP	regulation of mast cell activation involved in immune response	21100	9182	c("GO:0002279", "GO:0002699", "GO:0033003", "GO:0050776")
query_1	FALSE	1	9	56	1	0.0178571	0.111111	GO:0033007	GO:BP	negative regulation of mast cell activation involved in immune response	21100	9183	c("GO:0002279", "GO:0002698", "GO:0033004", "GO:0033006", "GO:0050777")
query_1	FALSE	1	67	56	2	0.0357143	0.0298507	GO:0033013	GO:BP	tetrapyrrole metabolic process	21100	9185	c("GO:0006725", "GO:0046483", "GO:1901360", "GO:1901564")
query_1	FALSE	1	36	56	1	0.0178571	0.0277778	GO:0033014	GO:BP	tetrapyrrole biosynthetic process	21100	9186	c("GO:0018130", "GO:0019438", "GO:0033013", "GO:0044271", "GO:1901362", "GO:1901566")
query_1	FALSE	1	12	56	1	0.0178571	0.0833333	GO:0033015	GO:BP	tetrapyrrole catabolic process	21100	9187	c("GO:0019439", "GO:0033013", "GO:0044270", "GO:0046700", "GO:1901361", "GO:1901565")
query_1	FALSE	1	34	56	1	0.0178571	0.0294118	GO:0033028	GO:BP	myeloid cell apoptotic process	21100	9196	GO:0006915
query_1	FALSE	1	6	56	1	0.0178571	0.166667	GO:0032459	GO:BP	regulation of protein oligomerization	21100	8766	c("GO:0043254", "GO:0051259")
query_1	FALSE	1	94	56	1	0.0178571	0.0106383	GO:0032436	GO:BP	positive regulation of proteasomal ubiquitin-dependent protein catabolic process	21100	8757	c("GO:0032434", "GO:0043161", "GO:1901800", "GO:2000060")
query_1	FALSE	1	37	56	1	0.0178571	0.027027	GO:0032435	GO:BP	negative regulation of proteasomal ubiquitin-dependent protein catabolic process	21100	8756	c("GO:0032434", "GO:0043161", "GO:1901799", "GO:2000059")
query_1	FALSE	1	141	56	2	0.0357143	0.0141844	GO:0032434	GO:BP	regulation of proteasomal ubiquitin-dependent protein catabolic process	21100	8755	c("GO:0043161", "GO:0061136", "GO:2000058")
query_1	FALSE	1	6004	56	24	0.428571	0.00399734	GO:0031323	GO:BP	regulation of cellular metabolic process	21100	8255	c("GO:0019222", "GO:0044237", "GO:0050794")
query_1	FALSE	1	2506	56	11	0.196429	0.00438947	GO:0031324	GO:BP	negative regulation of cellular metabolic process	21100	8256	c("GO:0009892", "GO:0031323", "GO:0044237", "GO:0048523")
query_1	FALSE	1	3271	56	14	0.25	0.00428004	GO:0031325	GO:BP	positive regulation of cellular metabolic process	21100	8257	c("GO:0009893", "GO:0031323", "GO:0044237", "GO:0048522")
query_1	FALSE	1	4085	56	19	0.339286	0.00465116	GO:0031326	GO:BP	regulation of cellular biosynthetic process	21100	8258	c("GO:0009889", "GO:0031323", "GO:0044249")
query_1	FALSE	1	1566	56	5	0.0892857	0.00319285	GO:0031327	GO:BP	negative regulation of cellular biosynthetic process	21100	8259	c("GO:0009890", "GO:0031324", "GO:0031326", "GO:0044249")
query_1	FALSE	1	1964	56	10	0.178571	0.00509165	GO:0031328	GO:BP	positive regulation of cellular biosynthetic process	21100	8260	c("GO:0009891", "GO:0031325", "GO:0031326", "GO:0044249")
query_1	FALSE	1	172	56	1	0.0178571	0.00581395	GO:0031214	GO:BP	biomineral tissue development	21100	8217	c("GO:0009888", "GO:0048513", "GO:0110148")
query_1	FALSE	1	871	56	6	0.107143	0.00688863	GO:0031329	GO:BP	regulation of cellular catabolic process	21100	8261	c("GO:0009894", "GO:0031323", "GO:0044248")
query_1	FALSE	1	451	56	5	0.0892857	0.0110865	GO:0031331	GO:BP	positive regulation of cellular catabolic process	21100	8263	c("GO:0009896", "GO:0031325", "GO:0031329", "GO:0044248")
query_1	FALSE	1	147	56	1	0.0178571	0.00680272	GO:0031333	GO:BP	negative regulation of protein-containing complex assembly	21100	8264	c("GO:0043254", "GO:0051129", "GO:0065003")
query_1	FALSE	1	194	56	1	0.0178571	0.00515464	GO:0031334	GO:BP	positive regulation of protein-containing complex assembly	21100	8265	c("GO:0043254", "GO:0044089", "GO:0051130", "GO:0065003")
query_1	FALSE	1	2	56	1	0.0178571	0.5	GO:0031335	GO:BP	regulation of sulfur amino acid metabolic process	21100	8266	c("GO:0000096", "GO:0042762", "GO:0051171", "GO:0062012")
query_1	FALSE	1	635	56	1	0.0178571	0.0015748	GO:0031344	GO:BP	regulation of cell projection organization	21100	8275	c("GO:0030030", "GO:0051128")
query_1	FALSE	1	183	56	1	0.0178571	0.00546448	GO:0031345	GO:BP	negative regulation of cell projection organization	21100	8276	c("GO:0030030", "GO:0031344", "GO:0051129")
query_1	FALSE	1	267	56	2	0.0357143	0.00749064	GO:0031330	GO:BP	negative regulation of cellular catabolic process	21100	8262	c("GO:0009895", "GO:0031324", "GO:0031329", "GO:0044248")
query_1	FALSE	1	957	56	2	0.0357143	0.00208986	GO:0031175	GO:BP	neuron projection development	21100	8213	c("GO:0048666", "GO:0120036")
query_1	FALSE	1	58	56	1	0.0178571	0.0172414	GO:0031122	GO:BP	cytoplasmic microtubule organization	21100	8169	c("GO:0000226", "GO:0097435")
query_1	FALSE	1	57	56	1	0.0178571	0.0175439	GO:0031102	GO:BP	neuron projection regeneration	21100	8150	c("GO:0031099", "GO:0031175", "GO:0033554")
query_1	FALSE	1	143	56	1	0.0178571	0.00699301	GO:0030856	GO:BP	regulation of epithelial cell differentiation	21100	8027	c("GO:0030855", "GO:0045595", "GO:2000026")
query_1	FALSE	1	138	56	1	0.0178571	0.00724638	GO:0030879	GO:BP	mammary gland development	21100	8037	GO:0048732
query_1	FALSE	1	65	56	1	0.0178571	0.0153846	GO:0030888	GO:BP	regulation of B cell proliferation	21100	8041	c("GO:0042100", "GO:0050670", "GO:0050864")
query_1	FALSE	1	43	56	1	0.0178571	0.0232558	GO:0030890	GO:BP	positive regulation of B cell proliferation	21100	8043	c("GO:0030888", "GO:0042100", "GO:0050671", "GO:0050871")
query_1	FALSE	1	384	56	2	0.0357143	0.00520833	GO:0030900	GO:BP	forebrain development	21100	8044	c("GO:0007420", "GO:0048856")
query_1	FALSE	1	77	56	1	0.0178571	0.012987	GO:0030968	GO:BP	endoplasmic reticulum unfolded protein response	21100	8080	c("GO:0007165", "GO:0034620", "GO:0034976")
query_1	FALSE	1	682	56	1	0.0178571	0.00146628	GO:0031047	GO:BP	gene silencing by RNA	21100	8119	GO:0010629
query_1	FALSE	1	13	56	1	0.0178571	0.0769231	GO:0031053	GO:BP	primary miRNA processing	21100	8124	c("GO:0034470", "GO:0035196")
query_1	FALSE	1	181	56	2	0.0357143	0.0110497	GO:0031056	GO:BP	regulation of histone modification	21100	8127	c("GO:0016570", "GO:0031399")
query_1	FALSE	1	106	56	2	0.0357143	0.0188679	GO:0031058	GO:BP	positive regulation of histone modification	21100	8129	c("GO:0016570", "GO:0031056", "GO:0031401")
query_1	FALSE	1	81	56	1	0.0178571	0.0123457	GO:0031060	GO:BP	regulation of histone methylation	21100	8131	c("GO:0016571", "GO:0031056")
query_1	FALSE	1	52	56	1	0.0178571	0.0192308	GO:0031062	GO:BP	positive regulation of histone methylation	21100	8133	c("GO:0016571", "GO:0031058", "GO:0031060")
query_1	FALSE	1	246	56	3	0.0535714	0.0121951	GO:0031098	GO:BP	stress-activated protein kinase signaling cascade	21100	8146	c("GO:0033554", "GO:0035556")
query_1	FALSE	1	187	56	2	0.0357143	0.0106952	GO:0031099	GO:BP	regeneration	21100	8147	GO:0048856
query_1	FALSE	1	65	56	1	0.0178571	0.0153846	GO:0031100	GO:BP	animal organ regeneration	21100	8148	c("GO:0031099", "GO:0048513")
query_1	FALSE	1	213	56	3	0.0535714	0.0140845	GO:0031396	GO:BP	regulation of protein ubiquitination	21100	8294	c("GO:0016567", "GO:1903320")
query_1	FALSE	1	66	56	1	0.0178571	0.0151515	GO:0033692	GO:BP	cellular polysaccharide biosynthetic process	21100	9611	c("GO:0000271", "GO:0034637", "GO:0034645", "GO:0044264")
query_1	FALSE	1	83	56	3	0.0535714	0.0361446	GO:0031397	GO:BP	negative regulation of protein ubiquitination	21100	8295	c("GO:0016567", "GO:0031396", "GO:1903321")
query_1	FALSE	1	500	56	4	0.0714286	0.008	GO:0031400	GO:BP	negative regulation of protein modification process	21100	8298	c("GO:0006464", "GO:0031399", "GO:0032269")
query_1	FALSE	1	54	56	1	0.0178571	0.0185185	GO:0032210	GO:BP	regulation of telomere maintenance via telomerase	21100	8587	c("GO:0007004", "GO:1904356", "GO:2000278")
query_1	FALSE	1	34	56	1	0.0178571	0.0294118	GO:0032212	GO:BP	positive regulation of telomere maintenance via telomerase	21100	8589	c("GO:0007004", "GO:0032210", "GO:1904358", "GO:2000573")
query_1	FALSE	1	384	56	1	0.0178571	0.00260417	GO:0032259	GO:BP	methylation	21100	8633	GO:0008152
query_1	FALSE	1	2370	56	9	0.160714	0.00379747	GO:0032268	GO:BP	regulation of cellular protein metabolic process	21100	8640	c("GO:0031323", "GO:0044267", "GO:0051246")
query_1	FALSE	1	970	56	5	0.0892857	0.00515464	GO:0032269	GO:BP	negative regulation of cellular protein metabolic process	21100	8641	c("GO:0031324", "GO:0032268", "GO:0044267", "GO:0051248")
query_1	FALSE	1	1406	56	5	0.0892857	0.00355619	GO:0032270	GO:BP	positive regulation of cellular protein metabolic process	21100	8642	c("GO:0031325", "GO:0032268", "GO:0044267", "GO:0051247")
query_1	FALSE	1	64	56	1	0.0178571	0.015625	GO:0032206	GO:BP	positive regulation of telomere maintenance	21100	8583	c("GO:0000723", "GO:0032204", "GO:0051054", "GO:2001252")
query_1	FALSE	1	18	56	2	0.0357143	0.111111	GO:0032354	GO:BP	response to follicle-stimulating hormone	21100	8704	GO:0034698
query_1	FALSE	1	29	56	1	0.0178571	0.0344828	GO:0032369	GO:BP	negative regulation of lipid transport	21100	8715	c("GO:0006869", "GO:0032368", "GO:0051051", "GO:1905953")
query_1	FALSE	1	339	56	2	0.0357143	0.00589971	GO:0032386	GO:BP	regulation of intracellular transport	21100	8732	c("GO:0046907", "GO:0051049", "GO:0060341")
query_1	FALSE	1	204	56	1	0.0178571	0.00490196	GO:0032388	GO:BP	positive regulation of intracellular transport	21100	8734	c("GO:0032386", "GO:0046907", "GO:0048522", "GO:0051050")
query_1	FALSE	1	279	56	2	0.0357143	0.00716846	GO:0032409	GO:BP	regulation of transporter activity	21100	8739	GO:0065009
query_1	FALSE	1	252	56	1	0.0178571	0.00396825	GO:0032412	GO:BP	regulation of ion transmembrane transporter activity	21100	8742	c("GO:0022898", "GO:0034765")
query_1	FALSE	1	78	56	1	0.0178571	0.0128205	GO:0032418	GO:BP	lysosome localization	21100	8748	GO:1990849
query_1	FALSE	1	136	56	1	0.0178571	0.00735294	GO:0032368	GO:BP	regulation of lipid transport	21100	8714	c("GO:0006869", "GO:0051049", "GO:1905952")
query_1	FALSE	1	37	56	1	0.0178571	0.027027	GO:0032205	GO:BP	negative regulation of telomere maintenance	21100	8582	c("GO:0000723", "GO:0032204", "GO:0051053", "GO:2001251")
query_1	FALSE	1	93	56	1	0.0178571	0.0107527	GO:0032204	GO:BP	regulation of telomere maintenance	21100	8581	c("GO:0000723", "GO:0033044", "GO:0051052")
query_1	FALSE	1	179	56	1	0.0178571	0.00558659	GO:0032200	GO:BP	telomere organization	21100	8577	GO:0051276
query_1	FALSE	1	999	56	3	0.0535714	0.003003	GO:0031401	GO:BP	positive regulation of protein modification process	21100	8299	c("GO:0006464", "GO:0031399", "GO:0032270")
query_1	FALSE	1	127	56	1	0.0178571	0.00787402	GO:0031570	GO:BP	DNA integrity checkpoint signaling	21100	8373	GO:0000075
query_1	FALSE	1	301	56	2	0.0357143	0.00664452	GO:0031647	GO:BP	regulation of protein stability	21100	8411	GO:0065008
query_1	FALSE	1	458	56	6	0.107143	0.0131004	GO:0031667	GO:BP	response to nutrient levels	21100	8430	GO:0009991
query_1	FALSE	1	250	56	4	0.0714286	0.016	GO:0031668	GO:BP	cellular response to extracellular stimulus	21100	8431	c("GO:0007154", "GO:0009991", "GO:0051716", "GO:0071496")
query_1	FALSE	1	219	56	4	0.0714286	0.0182648	GO:0031669	GO:BP	cellular response to nutrient levels	21100	8432	c("GO:0031667", "GO:0031668")
query_1	FALSE	1	42	56	2	0.0357143	0.047619	GO:0031670	GO:BP	cellular response to nutrient	21100	8433	c("GO:0007584", "GO:0031669", "GO:0070887")
query_1	FALSE	1	127	56	3	0.0535714	0.023622	GO:0031929	GO:BP	TOR signaling	21100	8449	GO:0035556
query_1	FALSE	1	20	56	1	0.0178571	0.05	GO:0031998	GO:BP	regulation of fatty acid beta-oxidation	21100	8476	c("GO:0006635", "GO:0031329", "GO:0046320", "GO:0050994")
query_1	FALSE	1	11	56	1	0.0178571	0.0909091	GO:0032000	GO:BP	positive regulation of fatty acid beta-oxidation	21100	8478	c("GO:0006635", "GO:0031331", "GO:0031998", "GO:0046321", "GO:0050996")
query_1	FALSE	1	105	56	3	0.0535714	0.0285714	GO:0032006	GO:BP	regulation of TOR signaling	21100	8480	c("GO:0031929", "GO:1902531")
query_1	FALSE	1	44	56	1	0.0178571	0.0227273	GO:0032007	GO:BP	negative regulation of TOR signaling	21100	8481	c("GO:0031929", "GO:0032006", "GO:1902532")
query_1	FALSE	1	48	56	1	0.0178571	0.0208333	GO:0032008	GO:BP	positive regulation of TOR signaling	21100	8482	c("GO:0031929", "GO:0032006", "GO:1902533")
query_1	FALSE	1	67	56	1	0.0178571	0.0149254	GO:0032024	GO:BP	positive regulation of insulin secretion	21100	8492	c("GO:0030073", "GO:0050714", "GO:0050796", "GO:0090277")
query_1	FALSE	1	31	56	1	0.0178571	0.0322581	GO:0032196	GO:BP	transposition	21100	8573	GO:0009987
query_1	FALSE	1	1527	56	7	0.125	0.00458415	GO:0031399	GO:BP	regulation of protein modification process	21100	8297	c("GO:0006464", "GO:0032268")
query_1	FALSE	1	151	56	1	0.0178571	0.00662252	GO:0050871	GO:BP	positive regulation of B cell activation	21100	15390	c("GO:0042113", "GO:0050864", "GO:0051251")
query_1	FALSE	1	879	56	4	0.0714286	0.00455063	GO:0033993	GO:BP	response to lipid	21100	9631	GO:0010033
query_1	FALSE	1	12	56	1	0.0178571	0.0833333	GO:0034088	GO:BP	maintenance of mitotic sister chromatid cohesion	21100	9659	c("GO:0007064", "GO:0034086", "GO:1903047")
query_1	FALSE	1	1833	56	7	0.125	0.00381888	GO:0040011	GO:BP	locomotion	21100	11458	GO:0008150
query_1	FALSE	1	997	56	5	0.0892857	0.00501505	GO:0040012	GO:BP	regulation of locomotion	21100	11459	c("GO:0040011", "GO:0050789")
query_1	FALSE	1	317	56	2	0.0357143	0.00630915	GO:0040013	GO:BP	negative regulation of locomotion	21100	11460	c("GO:0040011", "GO:0040012", "GO:0048519")
query_1	FALSE	1	563	56	2	0.0357143	0.0035524	GO:0040017	GO:BP	positive regulation of locomotion	21100	11464	c("GO:0040011", "GO:0040012", "GO:0048518")
query_1	FALSE	1	154	56	1	0.0178571	0.00649351	GO:0040029	GO:BP	regulation of gene expression, epigenetic	21100	11475	c("GO:0006325", "GO:0010468")
query_1	FALSE	1	429	56	2	0.0357143	0.004662	GO:0042060	GO:BP	wound healing	21100	11511	GO:0009611
query_1	FALSE	1	665	56	4	0.0714286	0.00601504	GO:0040008	GO:BP	regulation of growth	21100	11455	c("GO:0040007", "GO:0050789")
query_1	FALSE	1	64	56	1	0.0178571	0.015625	GO:0042093	GO:BP	T-helper cell differentiation	21100	11532	GO:0002294
query_1	FALSE	1	504	56	1	0.0178571	0.00198413	GO:0042110	GO:BP	T cell activation	21100	11538	GO:0046649
query_1	FALSE	1	337	56	1	0.0178571	0.00296736	GO:0042113	GO:BP	B cell activation	21100	11539	GO:0046649
query_1	FALSE	1	102	56	2	0.0357143	0.0196078	GO:0042116	GO:BP	macrophage activation	21100	11540	GO:0002274
query_1	FALSE	1	1658	56	10	0.178571	0.00603136	GO:0042127	GO:BP	regulation of cell population proliferation	21100	11549	c("GO:0008283", "GO:0050794")
query_1	FALSE	1	139	56	1	0.0178571	0.00719424	GO:0042157	GO:BP	lipoprotein metabolic process	21100	11567	GO:0019538
query_1	FALSE	1	101	56	1	0.0178571	0.00990099	GO:0042158	GO:BP	lipoprotein biosynthetic process	21100	11568	c("GO:0034645", "GO:0042157", "GO:1901566")
query_1	FALSE	1	101	56	1	0.0178571	0.00990099	GO:0042100	GO:BP	B cell proliferation	21100	11534	c("GO:0042113", "GO:0046651")
query_1	FALSE	1	11	56	1	0.0178571	0.0909091	GO:0042167	GO:BP	heme catabolic process	21100	11572	c("GO:0006787", "GO:0042168", "GO:0046149")
query_1	FALSE	1	959	56	5	0.0892857	0.00521376	GO:0040007	GO:BP	growth	21100	11454	GO:0008150
query_1	FALSE	1	51	56	2	0.0357143	0.0392157	GO:0038202	GO:BP	TORC1 signaling	21100	11253	GO:0031929
query_1	FALSE	1	159	56	1	0.0178571	0.00628931	GO:0035966	GO:BP	response to topologically incorrect protein	21100	10783	c("GO:0006950", "GO:0010033")
query_1	FALSE	1	118	56	1	0.0178571	0.00847458	GO:0035967	GO:BP	cellular response to topologically incorrect protein	21100	10784	c("GO:0033554", "GO:0035966", "GO:0071310")
query_1	FALSE	1	9	56	1	0.0178571	0.111111	GO:0035973	GO:BP	aggrephagy	21100	10789	GO:0061912
query_1	FALSE	1	15	56	1	0.0178571	0.0666667	GO:0036152	GO:BP	phosphatidylethanolamine acyl-chain remodeling	21100	10901	GO:0046470
query_1	FALSE	1	3719	56	17	0.303571	0.00457112	GO:0036211	GO:BP	protein modification process	21100	10936	c("GO:0019538", "GO:0043412")
query_1	FALSE	1	315	56	2	0.0357143	0.00634921	GO:0036293	GO:BP	response to decreased oxygen levels	21100	10995	GO:0070482
query_1	FALSE	1	13	56	2	0.0357143	0.153846	GO:0038203	GO:BP	TORC2 signaling	21100	11254	GO:0031929
query_1	FALSE	1	165	56	2	0.0357143	0.0121212	GO:0036294	GO:BP	cellular response to decreased oxygen levels	21100	10996	c("GO:0036293", "GO:0071453")
query_1	FALSE	1	91	56	1	0.0178571	0.010989	GO:0036473	GO:BP	cell death in response to oxidative stress	21100	11081	c("GO:0008219", "GO:0034599")
query_1	FALSE	1	33	56	1	0.0178571	0.030303	GO:0036475	GO:BP	neuron death in response to oxidative stress	21100	11083	c("GO:0036473", "GO:0070997")
query_1	FALSE	1	20	56	1	0.0178571	0.05	GO:0036498	GO:BP	IRE1-mediated unfolded protein response	21100	11101	GO:0030968
query_1	FALSE	1	111	56	1	0.0178571	0.00900901	GO:0036503	GO:BP	ERAD pathway	21100	11104	c("GO:0010243", "GO:0010498", "GO:0034976")
query_1	FALSE	1	53	56	2	0.0357143	0.0377358	GO:0038066	GO:BP	p38MAPK cascade	21100	11167	GO:0051403
query_1	FALSE	1	119	56	1	0.0178571	0.00840336	GO:0038127	GO:BP	ERBB signaling pathway	21100	11201	GO:0007169
query_1	FALSE	1	5	56	1	0.0178571	0.2	GO:0036446	GO:BP	myofibroblast differentiation	21100	11069	GO:0030154
query_1	FALSE	1	47	56	2	0.0357143	0.0425532	GO:0042168	GO:BP	heme metabolic process	21100	11573	c("GO:0006778", "GO:0042440")
query_1	FALSE	1	404	56	2	0.0357143	0.0049505	GO:0042176	GO:BP	regulation of protein catabolic process	21100	11576	c("GO:0009894", "GO:0030163", "GO:0051246")
query_1	FALSE	1	126	56	1	0.0178571	0.00793651	GO:0042177	GO:BP	negative regulation of protein catabolic process	21100	11577	c("GO:0009895", "GO:0030163", "GO:0042176", "GO:0051248")
query_1	FALSE	1	58	56	2	0.0357143	0.0344828	GO:0043030	GO:BP	regulation of macrophage activation	21100	12094	c("GO:0002694", "GO:0042116")
query_1	FALSE	1	27	56	1	0.0178571	0.037037	GO:0043032	GO:BP	positive regulation of macrophage activation	21100	12096	c("GO:0002696", "GO:0042116", "GO:0043030")
query_1	FALSE	1	736	56	3	0.0535714	0.00407609	GO:0043043	GO:BP	peptide biosynthetic process	21100	12102	c("GO:0006518", "GO:0043604", "GO:1901566")
query_1	FALSE	1	869	56	7	0.125	0.00805524	GO:0043066	GO:BP	negative regulation of apoptotic process	21100	12123	c("GO:0006915", "GO:0042981", "GO:0043069")
query_1	FALSE	1	887	56	7	0.125	0.00789177	GO:0043069	GO:BP	negative regulation of programmed cell death	21100	12126	c("GO:0012501", "GO:0043067", "GO:0060548")
query_1	FALSE	1	1170	56	3	0.0535714	0.0025641	GO:0043085	GO:BP	positive regulation of catalytic activity	21100	12129	c("GO:0044093", "GO:0050790")
query_1	FALSE	1	335	56	1	0.0178571	0.00298507	GO:0043010	GO:BP	camera-type eye development	21100	12089	GO:0001654
query_1	FALSE	1	755	56	3	0.0535714	0.00397351	GO:0043086	GO:BP	negative regulation of catalytic activity	21100	12130	c("GO:0044092", "GO:0050790")
query_1	FALSE	1	56	56	1	0.0178571	0.0178571	GO:0043113	GO:BP	receptor clustering	21100	12150	GO:0072657
query_1	FALSE	1	255	56	2	0.0357143	0.00784314	GO:0043122	GO:BP	regulation of I-kappaB kinase/NF-kappaB signaling	21100	12154	c("GO:0007249", "GO:1902531")
query_1	FALSE	1	191	56	1	0.0178571	0.0052356	GO:0043123	GO:BP	positive regulation of I-kappaB kinase/NF-kappaB signaling	21100	12155	c("GO:0007249", "GO:0043122", "GO:1902533")
query_1	FALSE	1	75	56	1	0.0178571	0.0133333	GO:0043154	GO:BP	negative regulation of cysteine-type endopeptidase activity involved in apoptotic process	21100	12174	c("GO:0043066", "GO:0043281", "GO:2000117")
query_1	FALSE	1	444	56	5	0.0892857	0.0112613	GO:0043161	GO:BP	proteasome-mediated ubiquitin-dependent protein catabolic process	21100	12179	c("GO:0006511", "GO:0010498")
query_1	FALSE	1	12360	56	36	0.642857	0.00291262	GO:0043170	GO:BP	macromolecule metabolic process	21100	12184	GO:0071704
query_1	FALSE	1	60	56	1	0.0178571	0.0166667	GO:0043112	GO:BP	receptor metabolic process	21100	12149	GO:0044260
query_1	FALSE	1	653	56	4	0.0714286	0.00612557	GO:0043009	GO:BP	chordate embryonic development	21100	12088	GO:0009792
query_1	FALSE	1	9	56	1	0.0178571	0.111111	GO:0042939	GO:BP	tripeptide transport	21100	12046	GO:0006857
query_1	FALSE	1	7	56	1	0.0178571	0.142857	GO:0042938	GO:BP	dipeptide transport	21100	12045	GO:0006857
query_1	FALSE	1	231	56	2	0.0357143	0.00865801	GO:0042180	GO:BP	cellular ketone metabolic process	21100	11580	c("GO:0044237", "GO:0044281", "GO:0071704")
query_1	FALSE	1	4336	56	19	0.339286	0.00438192	GO:0042221	GO:BP	response to chemical	21100	11621	GO:0050896
query_1	FALSE	1	1242	56	3	0.0535714	0.00241546	GO:0042325	GO:BP	regulation of phosphorylation	21100	11668	c("GO:0016310", "GO:0019220")
query_1	FALSE	1	362	56	2	0.0357143	0.00552486	GO:0042326	GO:BP	negative regulation of phosphorylation	21100	11669	c("GO:0016310", "GO:0042325", "GO:0045936")
query_1	FALSE	1	816	56	1	0.0178571	0.00122549	GO:0042327	GO:BP	positive regulation of phosphorylation	21100	11670	c("GO:0016310", "GO:0042325", "GO:0045937")
query_1	FALSE	1	18	56	1	0.0178571	0.0555556	GO:0042339	GO:BP	keratan sulfate metabolic process	21100	11680	c("GO:0006790", "GO:1903510")
query_1	FALSE	1	420	56	2	0.0357143	0.0047619	GO:0042391	GO:BP	regulation of membrane potential	21100	11717	GO:0065008
query_1	FALSE	1	23	56	1	0.0178571	0.0434783	GO:0042438	GO:BP	melanin biosynthetic process	21100	11755	c("GO:0006582", "GO:0044550", "GO:0046148", "GO:0046189")
query_1	FALSE	1	79	56	3	0.0535714	0.0379747	GO:0042440	GO:BP	pigment metabolic process	21100	11757	GO:0008152
query_1	FALSE	1	240	56	4	0.0714286	0.0166667	GO:0042593	GO:BP	glucose homeostasis	21100	11833	GO:0033500
query_1	FALSE	1	203	56	2	0.0357143	0.00985222	GO:0042594	GO:BP	response to starvation	21100	11834	c("GO:0006950", "GO:0031667")
query_1	FALSE	1	10	56	1	0.0178571	0.1	GO:0042762	GO:BP	regulation of sulfur metabolic process	21100	11938	c("GO:0006790", "GO:0031323")
query_1	FALSE	1	180	56	1	0.0178571	0.00555556	GO:0042770	GO:BP	signal transduction in response to DNA damage	21100	11941	c("GO:0006974", "GO:0035556")
query_1	FALSE	1	47	56	1	0.0178571	0.0212766	GO:0042771	GO:BP	intrinsic apoptotic signaling pathway in response to DNA damage by p53 class mediator	21100	11942	c("GO:0008630", "GO:0072332")
query_1	FALSE	1	294	56	3	0.0535714	0.0102041	GO:0042886	GO:BP	amide transport	21100	12022	GO:0071705
query_1	FALSE	1	59	56	1	0.0178571	0.0169492	GO:0035825	GO:BP	homologous recombination	21100	10665	GO:0006310
query_1	FALSE	1	16	56	1	0.0178571	0.0625	GO:0035795	GO:BP	negative regulation of mitochondrial membrane permeability	21100	10642	c("GO:0046902", "GO:1905709")
query_1	FALSE	1	47	56	2	0.0357143	0.0425532	GO:0035794	GO:BP	positive regulation of mitochondrial membrane permeability	21100	10641	c("GO:0046902", "GO:1905710")
query_1	FALSE	1	59	56	1	0.0178571	0.0169492	GO:0035773	GO:BP	insulin secretion involved in cellular response to glucose stimulus	21100	10622	c("GO:0030073", "GO:0051649", "GO:0071333")
query_1	FALSE	1	40	56	1	0.0178571	0.025	GO:0034381	GO:BP	plasma lipoprotein particle clearance	21100	9880	c("GO:0032501", "GO:0097006")
query_1	FALSE	1	27	56	1	0.0178571	0.037037	GO:0034383	GO:BP	low-density lipoprotein particle clearance	21100	9882	GO:0034381
query_1	FALSE	1	2	56	1	0.0178571	0.5	GO:0034395	GO:BP	regulation of transcription from RNA polymerase II promoter in response to iron	21100	9890	c("GO:0006357", "GO:0071281")
query_1	FALSE	1	113	56	1	0.0178571	0.00884956	GO:0034440	GO:BP	lipid oxidation	21100	9921	GO:0030258
query_1	FALSE	1	429	56	1	0.0178571	0.002331	GO:0034470	GO:BP	ncRNA processing	21100	9936	c("GO:0006396", "GO:0034660")
query_1	FALSE	1	98	56	2	0.0357143	0.0204082	GO:0034502	GO:BP	protein localization to chromosome	21100	9957	GO:0033365
query_1	FALSE	1	51	56	1	0.0178571	0.0196078	GO:0034332	GO:BP	adherens junction organization	21100	9847	GO:0045216
query_1	FALSE	1	301	56	1	0.0178571	0.00332226	GO:0034504	GO:BP	protein localization to nucleus	21100	9959	GO:0033365
query_1	FALSE	1	262	56	1	0.0178571	0.00381679	GO:0034612	GO:BP	response to tumor necrosis factor	21100	9980	GO:0034097
query_1	FALSE	1	1913	56	8	0.142857	0.00418191	GO:0034613	GO:BP	cellular protein localization	21100	9981	c("GO:0008104", "GO:0070727")
query_1	FALSE	1	140	56	3	0.0535714	0.0214286	GO:0034614	GO:BP	cellular response to reactive oxygen species	21100	9982	c("GO:0000302", "GO:0034599", "GO:1901701")
query_1	FALSE	1	99	56	1	0.0178571	0.010101	GO:0034620	GO:BP	cellular response to unfolded protein	21100	9984	c("GO:0006986", "GO:0035967")
query_1	FALSE	1	8	56	1	0.0178571	0.125	GO:0034635	GO:BP	glutathione transport	21100	9993	c("GO:0015711", "GO:0042939", "GO:0072337", "GO:0072348")
query_1	FALSE	1	78	56	1	0.0178571	0.0128205	GO:0034637	GO:BP	cellular carbohydrate biosynthetic process	21100	9994	c("GO:0016051", "GO:0044249", "GO:0044262")
query_1	FALSE	1	65	56	1	0.0178571	0.0153846	GO:0034605	GO:BP	cellular response to heat	21100	9975	c("GO:0009408", "GO:0033554")
query_1	FALSE	1	691	56	3	0.0535714	0.00434153	GO:0034330	GO:BP	cell junction organization	21100	9845	GO:0016043
query_1	FALSE	1	39	56	1	0.0178571	0.025641	GO:0034314	GO:BP	Arp2/3 complex-mediated actin nucleation	21100	9841	GO:0045010
query_1	FALSE	1	201	56	4	0.0714286	0.0199005	GO:0034284	GO:BP	response to monosaccharide	21100	9814	GO:0009743
query_1	FALSE	1	8	56	1	0.0178571	0.125	GO:0034091	GO:BP	regulation of maintenance of sister chromatid cohesion	21100	9662	c("GO:0007063", "GO:0034086")
query_1	FALSE	1	3	56	1	0.0178571	0.333333	GO:0034092	GO:BP	negative regulation of maintenance of sister chromatid cohesion	21100	9663	c("GO:0034086", "GO:0034091", "GO:0045875")
query_1	FALSE	1	921	56	4	0.0714286	0.00434311	GO:0034097	GO:BP	response to cytokine	21100	9668	GO:0010033
query_1	FALSE	1	132	56	1	0.0178571	0.00757576	GO:0034101	GO:BP	erythrocyte homeostasis	21100	9669	GO:0002262
query_1	FALSE	1	94	56	1	0.0178571	0.0106383	GO:0034109	GO:BP	homotypic cell-cell adhesion	21100	9677	GO:0098609
query_1	FALSE	1	71	56	1	0.0178571	0.0140845	GO:0034121	GO:BP	regulation of toll-like receptor signaling pathway	21100	9689	c("GO:0002224", "GO:0062207")
query_1	FALSE	1	28	56	1	0.0178571	0.0357143	GO:0034123	GO:BP	positive regulation of toll-like receptor signaling pathway	21100	9691	c("GO:0002224", "GO:0034121", "GO:0062208")
query_1	FALSE	1	17	56	1	0.0178571	0.0588235	GO:0034134	GO:BP	toll-like receptor 2 signaling pathway	21100	9702	GO:0002224
query_1	FALSE	1	12	56	1	0.0178571	0.0833333	GO:0034135	GO:BP	regulation of toll-like receptor 2 signaling pathway	21100	9703	c("GO:0034121", "GO:0034134")
query_1	FALSE	1	6	56	1	0.0178571	0.166667	GO:0034137	GO:BP	positive regulation of toll-like receptor 2 signaling pathway	21100	9705	c("GO:0034123", "GO:0034134", "GO:0034135")
query_1	FALSE	1	8	56	1	0.0178571	0.125	GO:0034182	GO:BP	regulation of maintenance of mitotic sister chromatid cohesion	21100	9750	c("GO:0034088", "GO:0034091")
query_1	FALSE	1	3	56	1	0.0178571	0.333333	GO:0034183	GO:BP	negative regulation of maintenance of mitotic sister chromatid cohesion	21100	9751	c("GO:0034088", "GO:0034092", "GO:0034182")
query_1	FALSE	1	129	56	1	0.0178571	0.00775194	GO:0034219	GO:BP	carbohydrate transmembrane transport	21100	9773	c("GO:0008643", "GO:0055085")
query_1	FALSE	1	1113	56	4	0.0714286	0.00359389	GO:0034220	GO:BP	ion transmembrane transport	21100	9774	c("GO:0006811", "GO:0055085")
query_1	FALSE	1	449	56	1	0.0178571	0.00222717	GO:0034248	GO:BP	regulation of cellular amide metabolic process	21100	9795	c("GO:0031323", "GO:0043603", "GO:0051171")
query_1	FALSE	1	8829	56	24	0.428571	0.00271831	GO:0034641	GO:BP	cellular nitrogen compound metabolic process	21100	9997	c("GO:0006807", "GO:0044237")
query_1	FALSE	1	12	56	1	0.0178571	0.0833333	GO:0034086	GO:BP	maintenance of sister chromatid cohesion	21100	9657	c("GO:0007062", "GO:0022402")
query_1	FALSE	1	89	56	1	0.0178571	0.011236	GO:0034644	GO:BP	cellular response to UV	21100	10000	c("GO:0009411", "GO:0071482")
query_1	FALSE	1	3984	56	16	0.285714	0.00401606	GO:0034654	GO:BP	nucleobase-containing compound biosynthetic process	21100	10006	c("GO:0006139", "GO:0018130", "GO:0019438", "GO:0044271", "GO:1901362")
query_1	FALSE	1	156	56	1	0.0178571	0.00641026	GO:0035265	GO:BP	organ growth	21100	10263	c("GO:0032501", "GO:0048589")
query_1	FALSE	1	1054	56	4	0.0714286	0.00379507	GO:0035295	GO:BP	tube development	21100	10287	c("GO:0007275", "GO:0048856")
query_1	FALSE	1	139	56	2	0.0357143	0.0143885	GO:0035296	GO:BP	regulation of tube diameter	21100	10288	GO:0035150
query_1	FALSE	1	41	56	1	0.0178571	0.0243902	GO:0035329	GO:BP	hippo signaling	21100	10310	GO:0035556
query_1	FALSE	1	18	56	1	0.0178571	0.0555556	GO:0035372	GO:BP	protein localization to microtubule	21100	10344	GO:0072698
query_1	FALSE	1	7	56	1	0.0178571	0.142857	GO:0035442	GO:BP	dipeptide transmembrane transport	21100	10393	c("GO:0035672", "GO:0042938")
query_1	FALSE	1	151	56	1	0.0178571	0.00662252	GO:0035264	GO:BP	multicellular organism growth	21100	10262	c("GO:0032501", "GO:0048589")
query_1	FALSE	1	7	56	1	0.0178571	0.142857	GO:0035443	GO:BP	tripeptide transmembrane transport	21100	10394	c("GO:0035672", "GO:0042939")
query_1	FALSE	1	340	56	2	0.0357143	0.00588235	GO:0035592	GO:BP	establishment of protein localization to extracellular region	21100	10490	c("GO:0045184", "GO:0071692")
query_1	FALSE	1	14	56	1	0.0178571	0.0714286	GO:0035672	GO:BP	oligopeptide transmembrane transport	21100	10540	c("GO:0006857", "GO:0055085")
query_1	FALSE	1	103	56	1	0.0178571	0.00970874	GO:0035710	GO:BP	CD4-positive, alpha-beta T cell activation	21100	10573	GO:0046631
query_1	FALSE	1	174	56	1	0.0178571	0.00574713	GO:0035725	GO:BP	sodium ion transmembrane transport	21100	10584	c("GO:0006814", "GO:0098662")
query_1	FALSE	1	20	56	2	0.0357143	0.1	GO:0035728	GO:BP	response to hepatocyte growth factor	21100	10586	GO:0070848
query_1	FALSE	1	18	56	2	0.0357143	0.111111	GO:0035729	GO:BP	cellular response to hepatocyte growth factor stimulus	21100	10587	c("GO:0035728", "GO:0071363")
query_1	FALSE	1	2629	56	13	0.232143	0.00494485	GO:0035556	GO:BP	intracellular signal transduction	21100	10463	GO:0007165
query_1	FALSE	1	854	56	1	0.0178571	0.00117096	GO:0035239	GO:BP	tube morphogenesis	21100	10253	c("GO:0009653", "GO:0035295")
query_1	FALSE	1	1	56	1	0.0178571	1	GO:0035229	GO:BP	positive regulation of glutamate-cysteine ligase activity	21100	10246	c("GO:0035227", "GO:0051351")
query_1	FALSE	1	1	56	1	0.0178571	1	GO:0035227	GO:BP	regulation of glutamate-cysteine ligase activity	21100	10244	GO:0051340
query_1	FALSE	1	568	56	1	0.0178571	0.00176056	GO:0034660	GO:BP	ncRNA metabolic process	21100	10010	GO:0016070
query_1	FALSE	1	29	56	2	0.0357143	0.0689655	GO:0034698	GO:BP	response to gonadotropin	21100	10019	GO:0009725
query_1	FALSE	1	7	56	1	0.0178571	0.142857	GO:0034727	GO:BP	piecemeal microautophagy of the nucleus	21100	10027	c("GO:0016237", "GO:0044804")
query_1	FALSE	1	569	56	3	0.0535714	0.00527241	GO:0034762	GO:BP	regulation of transmembrane transport	21100	10038	c("GO:0050794", "GO:0051049", "GO:0055085")
query_1	FALSE	1	120	56	1	0.0178571	0.00833333	GO:0034763	GO:BP	negative regulation of transmembrane transport	21100	10039	c("GO:0034762", "GO:0048523", "GO:0051051", "GO:0055085")
query_1	FALSE	1	220	56	1	0.0178571	0.00454545	GO:0034764	GO:BP	positive regulation of transmembrane transport	21100	10040	c("GO:0034762", "GO:0048522", "GO:0051050", "GO:0055085")
query_1	FALSE	1	487	56	1	0.0178571	0.00205339	GO:0034765	GO:BP	regulation of ion transmembrane transport	21100	10041	c("GO:0034220", "GO:0034762", "GO:0043269")
query_1	FALSE	1	6	56	1	0.0178571	0.166667	GO:0034775	GO:BP	glutathione transmembrane transport	21100	10049	c("GO:0034635", "GO:0035443", "GO:0098656")
query_1	FALSE	1	130	56	1	0.0178571	0.00769231	GO:0034968	GO:BP	histone lysine methylation	21100	10056	c("GO:0016571", "GO:0018022")
query_1	FALSE	1	258	56	2	0.0357143	0.00775194	GO:0034976	GO:BP	response to endoplasmic reticulum stress	21100	10062	GO:0033554
query_1	FALSE	1	62	56	1	0.0178571	0.016129	GO:0035065	GO:BP	regulation of histone acetylation	21100	10108	c("GO:0016573", "GO:0031056", "GO:2000756")
query_1	FALSE	1	31	56	1	0.0178571	0.0322581	GO:0035066	GO:BP	positive regulation of histone acetylation	21100	10109	c("GO:0016573", "GO:0031058", "GO:0035065", "GO:2000758")
query_1	FALSE	1	49	56	2	0.0357143	0.0408163	GO:0035094	GO:BP	response to nicotine	21100	10130	GO:0042221
query_1	FALSE	1	140	56	2	0.0357143	0.0142857	GO:0035150	GO:BP	regulation of tube size	21100	10177	GO:0090066
query_1	FALSE	1	49	56	1	0.0178571	0.0204082	GO:0035196	GO:BP	miRNA maturation	21100	10216	GO:0070918
query_1	FALSE	1	1171	56	2	0.0357143	0.00170794	GO:0034645	GO:BP	cellular macromolecule biosynthetic process	21100	10001	c("GO:0009059", "GO:0044249", "GO:0044260")
query_1	TRUE	0.000316042	39	23	4	0.173913	0.102564	KEGG:04216	KEGG	Ferroptosis	7559	276	KEGG:00000
query_1	TRUE	0.00662176	162	23	5	0.217391	0.0308642	KEGG:05225	KEGG	Hepatocellular carcinoma	7559	458	KEGG:00000
query_1	TRUE	0.0397455	517	23	7	0.304348	0.0135397	KEGG:05200	KEGG	Pathways in cancer	7559	435	KEGG:00000
query_1	TRUE	0.0418918	135	23	4	0.173913	0.0296296	KEGG:04140	KEGG	Autophagy - animal	7559	261	KEGG:00000
query_1	FALSE	0.0746502	70	23	3	0.130435	0.0428571	KEGG:04137	KEGG	Mitophagy - animal	7559	258	KEGG:00000
query_1	FALSE	0.40756	40	23	2	0.0869565	0.05	KEGG:00860	KEGG	Porphyrin metabolism	7559	128	KEGG:00000
query_1	FALSE	0.563158	143	23	3	0.130435	0.020979	KEGG:01240	KEGG	Biosynthesis of cofactors	7559	188	KEGG:00000
query_1	FALSE	0.563158	143	23	3	0.130435	0.020979	KEGG:05226	KEGG	Gastric cancer	7559	459	KEGG:00000
query_1	FALSE	0.563158	143	23	3	0.130435	0.020979	KEGG:05224	KEGG	Breast cancer	7559	457	KEGG:00000
query_1	FALSE	0.604363	49	23	2	0.0869565	0.0408163	KEGG:00270	KEGG	Cysteine and methionine metabolism	7559	30	KEGG:00000
query_1	FALSE	0.781291	56	23	2	0.0869565	0.0357143	KEGG:00480	KEGG	Glutathione metabolism	7559	62	KEGG:00000
query_1	FALSE	1	45	23	1	0.0434783	0.0222222	KEGG:04930	KEGG	Type II diabetes mellitus	7559	369	KEGG:00000
query_1	FALSE	1	103	23	1	0.0434783	0.00970874	KEGG:04931	KEGG	Insulin resistance	7559	370	KEGG:00000
query_1	FALSE	1	142	23	1	0.0434783	0.00704225	KEGG:04932	KEGG	Non-alcoholic fatty liver disease	7559	371	KEGG:00000
query_1	FALSE	1	99	23	1	0.0434783	0.010101	KEGG:04933	KEGG	AGE-RAGE signaling pathway in diabetic complications	7559	372	KEGG:00000
query_1	FALSE	1	113	23	1	0.0434783	0.00884956	KEGG:04935	KEGG	Growth hormone synthesis, secretion and action	7559	374	KEGG:00000
query_1	FALSE	1	57	23	1	0.0434783	0.0175439	KEGG:04978	KEGG	Mineral absorption	7559	391	KEGG:00000
query_1	FALSE	1	102	23	1	0.0434783	0.00980392	KEGG:04928	KEGG	Parathyroid hormone synthesis, secretion and action	7559	367	KEGG:00000
query_1	FALSE	1	353	23	4	0.173913	0.0113314	KEGG:05010	KEGG	Alzheimer disease	7559	393	KEGG:00000
query_1	FALSE	1	272	23	2	0.0869565	0.00735294	KEGG:05016	KEGG	Huntington disease	7559	396	KEGG:00000
query_1	FALSE	1	132	23	1	0.0434783	0.00757576	KEGG:05017	KEGG	Spinocerebellar ataxia	7559	397	KEGG:00000
query_1	FALSE	1	442	23	4	0.173913	0.00904977	KEGG:05022	KEGG	Pathways of neurodegeneration - multiple diseases	7559	399	KEGG:00000
query_1	FALSE	1	239	23	1	0.0434783	0.0041841	KEGG:05131	KEGG	Shigellosis	7559	410	KEGG:00000
query_1	FALSE	1	135	23	1	0.0434783	0.00740741	KEGG:05162	KEGG	Measles	7559	425	KEGG:00000
query_1	FALSE	1	477	23	2	0.0869565	0.00419287	KEGG:05168	KEGG	Herpes simplex virus 1 infection	7559	431	KEGG:00000
query_1	FALSE	1	327	23	2	0.0869565	0.00611621	KEGG:05014	KEGG	Amyotrophic lateral sclerosis	7559	395	KEGG:00000
query_1	FALSE	1	191	23	1	0.0434783	0.0052356	KEGG:05169	KEGG	Epstein-Barr virus infection	7559	432	KEGG:00000
query_1	FALSE	1	54	23	1	0.0434783	0.0185185	KEGG:04923	KEGG	Regulation of lipolysis in adipocytes	7559	362	KEGG:00000
query_1	FALSE	1	131	23	1	0.0434783	0.00763359	KEGG:04910	KEGG	Insulin signaling pathway	7559	349	KEGG:00000
query_1	FALSE	1	114	23	2	0.0869565	0.0175439	KEGG:04152	KEGG	AMPK signaling pathway	7559	269	KEGG:00000
query_1	FALSE	1	130	23	2	0.0869565	0.0153846	KEGG:04210	KEGG	Apoptosis	7559	270	KEGG:00000
query_1	FALSE	1	86	23	2	0.0869565	0.0232558	KEGG:04211	KEGG	Longevity regulating pathway	7559	271	KEGG:00000
query_1	FALSE	1	58	23	1	0.0434783	0.0172414	KEGG:04213	KEGG	Longevity regulating pathway - multiple species	7559	273	KEGG:00000
query_1	FALSE	1	32	23	1	0.0434783	0.03125	KEGG:04215	KEGG	Apoptosis - multiple species	7559	275	KEGG:00000
query_1	FALSE	1	152	23	1	0.0434783	0.00657895	KEGG:04217	KEGG	Necroptosis	7559	277	KEGG:00000
query_1	FALSE	1	69	23	1	0.0434783	0.0144928	KEGG:04920	KEGG	Adipocytokine signaling pathway	7559	359	KEGG:00000
query_1	FALSE	1	152	23	2	0.0869565	0.0131579	KEGG:04218	KEGG	Cellular senescence	7559	278	KEGG:00000
query_1	FALSE	1	55	23	1	0.0434783	0.0181818	KEGG:04330	KEGG	Notch signaling pathway	7559	284	KEGG:00000
query_1	FALSE	1	124	23	2	0.0869565	0.016129	KEGG:04380	KEGG	Osteoclast differentiation	7559	292	KEGG:00000
query_1	FALSE	1	148	23	1	0.0434783	0.00675676	KEGG:04390	KEGG	Hippo signaling pathway	7559	293	KEGG:00000
query_1	FALSE	1	68	23	1	0.0434783	0.0147059	KEGG:04622	KEGG	RIG-I-like receptor signaling pathway	7559	310	KEGG:00000
query_1	FALSE	1	159	23	1	0.0434783	0.00628931	KEGG:04630	KEGG	JAK-STAT signaling pathway	7559	315	KEGG:00000
query_1	FALSE	1	91	23	1	0.0434783	0.010989	KEGG:04657	KEGG	IL-17 signaling pathway	7559	318	KEGG:00000
query_1	FALSE	1	162	23	2	0.0869565	0.0123457	KEGG:04310	KEGG	Wnt signaling pathway	7559	282	KEGG:00000
query_1	FALSE	1	342	23	1	0.0434783	0.00292398	KEGG:04151	KEGG	PI3K-Akt signaling pathway	7559	268	KEGG:00000
query_1	FALSE	1	182	23	1	0.0434783	0.00549451	KEGG:05202	KEGG	Transcriptional misregulation in cancer	7559	436	KEGG:00000
query_1	FALSE	1	206	23	1	0.0434783	0.00485437	KEGG:05208	KEGG	Chemical carcinogenesis - reactive oxygen species	7559	442	KEGG:00000
query_1	FALSE	1	306	23	3	0.130435	0.00980392	KEGG:05206	KEGG	MicroRNAs in cancer	7559	440	KEGG:00000
query_1	FALSE	1	83	23	2	0.0869565	0.0240964	KEGG:05210	KEGG	Colorectal cancer	7559	443	KEGG:00000
query_1	FALSE	1	74	23	1	0.0434783	0.0135135	KEGG:05212	KEGG	Pancreatic cancer	7559	445	KEGG:00000
query_1	FALSE	1	57	23	1	0.0434783	0.0175439	KEGG:05213	KEGG	Endometrial cancer	7559	446	KEGG:00000
query_1	FALSE	1	71	23	1	0.0434783	0.0140845	KEGG:05214	KEGG	Glioma	7559	447	KEGG:00000
query_1	FALSE	1	37	23	1	0.0434783	0.027027	KEGG:05216	KEGG	Thyroid cancer	7559	449	KEGG:00000
query_1	FALSE	1	62	23	1	0.0434783	0.016129	KEGG:05217	KEGG	Basal cell carcinoma	7559	450	KEGG:00000
query_1	FALSE	1	70	23	1	0.0434783	0.0142857	KEGG:05218	KEGG	Melanoma	7559	451	KEGG:00000
query_1	FALSE	1	65	23	1	0.0434783	0.0153846	KEGG:05221	KEGG	Acute myeloid leukemia	7559	454	KEGG:00000
query_1	FALSE	1	90	23	1	0.0434783	0.0111111	KEGG:05222	KEGG	Small cell lung cancer	7559	455	KEGG:00000
query_1	FALSE	1	71	23	1	0.0434783	0.0140845	KEGG:05223	KEGG	Non-small cell lung cancer	7559	456	KEGG:00000
query_1	FALSE	1	134	23	2	0.0869565	0.0149254	KEGG:05418	KEGG	Fluid shear stress and atherosclerosis	7559	477	KEGG:00000
query_1	FALSE	1	73	23	1	0.0434783	0.0136986	KEGG:05220	KEGG	Chronic myeloid leukemia	7559	453	KEGG:00000
query_1	FALSE	1	151	23	2	0.0869565	0.013245	KEGG:04150	KEGG	mTOR signaling pathway	7559	267	KEGG:00000
query_1	FALSE	1	120	23	1	0.0434783	0.00833333	KEGG:04110	KEGG	Cell cycle	7559	248	KEGG:00000
query_1	FALSE	1	72	23	2	0.0869565	0.0277778	KEGG:04115	KEGG	p53 signaling pathway	7559	253	KEGG:00000
query_1	FALSE	1	7559	23	23	1	0.00304273	KEGG:00000	KEGG	KEGG root term	7559	1	character(0)
query_1	FALSE	1	17	23	1	0.0434783	0.0588235	KEGG:00450	KEGG	Selenocompound metabolism	7559	59	KEGG:00000
query_1	FALSE	1	1457	23	4	0.173913	0.00274537	KEGG:01100	KEGG	Metabolic pathways	7559	179	KEGG:00000
query_1	FALSE	1	123	23	1	0.0434783	0.00813008	KEGG:03040	KEGG	Spliceosome	7559	213	KEGG:00000
query_1	FALSE	1	286	23	2	0.0869565	0.00699301	KEGG:04010	KEGG	MAPK signaling pathway	7559	227	KEGG:00000
query_1	FALSE	1	161	23	1	0.0434783	0.00621118	KEGG:04022	KEGG	cGMP-PKG signaling pathway	7559	235	KEGG:00000
query_1	FALSE	1	102	23	1	0.0434783	0.00980392	KEGG:04064	KEGG	NF-kappa B signaling pathway	7559	240	KEGG:00000
query_1	FALSE	1	108	23	1	0.0434783	0.00925926	KEGG:04066	KEGG	HIF-1 signaling pathway	7559	241	KEGG:00000
query_1	FALSE	1	128	23	2	0.0869565	0.015625	KEGG:04068	KEGG	FoxO signaling pathway	7559	242	KEGG:00000
query_1	FALSE	1	70	23	1	0.0434783	0.0142857	KEGG:01524	KEGG	Platinum drug resistance	7559	196	KEGG:00000
query_1	TRUE	0.0014369	11	33	3	0.0909091	0.272727	REAC:R-HSA-9664873	REAC	Pexophagy	10770	1626	REAC:R-HSA-9663891
query_1	TRUE	0.00307596	2	33	2	0.0606061	1	REAC:R-HSA-5578999	REAC	Defective GCLC causes HAGGSD	10770	534	REAC:R-HSA-5579029
query_1	TRUE	0.0246346	27	33	3	0.0909091	0.111111	REAC:R-HSA-5205647	REAC	Mitophagy	10770	1388	REAC:R-HSA-9663891
query_1	TRUE	0.0331253	80	33	4	0.121212	0.05	REAC:R-HSA-9663891	REAC	Selective autophagy	10770	2036	REAC:R-HSA-1632852
query_1	FALSE	0.199154	12	33	2	0.0606061	0.166667	REAC:R-HSA-174403	REAC	Glutathione synthesis and recycling	10770	997	REAC:R-HSA-156590
query_1	FALSE	0.234912	13	33	2	0.0606061	0.153846	REAC:R-HSA-209543	REAC	p75NTR recruits signalling complexes	10770	2552	REAC:R-HSA-193639
query_1	FALSE	0.234912	13	33	2	0.0606061	0.153846	REAC:R-HSA-209560	REAC	NF-kB is activated and signals survival	10770	1425	REAC:R-HSA-193639
query_1	FALSE	0.239415	134	33	4	0.121212	0.0298507	REAC:R-HSA-1632852	REAC	Macroautophagy	10770	1308	REAC:R-HSA-9612973
query_1	FALSE	0.239782	362	33	6	0.181818	0.0165746	REAC:R-HSA-3700989	REAC	Transcriptional Regulation by TP53	10770	2384	REAC:R-HSA-212436
query_1	FALSE	0.355998	149	33	4	0.121212	0.0268456	REAC:R-HSA-9612973	REAC	Autophagy	10770	186	REAC:0000000
query_1	FALSE	0.359331	16	33	2	0.0606061	0.125	REAC:R-HSA-193639	REAC	p75NTR signals via NF-kB	10770	2554	REAC:R-HSA-193704
query_1	FALSE	0.359331	16	33	2	0.0606061	0.125	REAC:R-HSA-205043	REAC	NRIF signals cell death from the nucleus	10770	1450	REAC:R-HSA-204998
query_1	FALSE	0.406462	17	33	2	0.0606061	0.117647	REAC:R-HSA-196299	REAC	Beta-catenin phosphorylation cascade	10770	208	REAC:R-HSA-195253
query_1	FALSE	0.46358	160	33	4	0.121212	0.025	REAC:R-HSA-5633007	REAC	Regulation of TP53 Activity	10770	1881	REAC:R-HSA-3700989
query_1	FALSE	0.509112	19	33	2	0.0606061	0.105263	REAC:R-HSA-9609523	REAC	Insertion of tail-anchored proteins into the endoplasmic reticulum membrane	10770	1138	REAC:R-HSA-9609507
query_1	FALSE	0.509112	19	33	2	0.0606061	0.105263	REAC:R-HSA-6804760	REAC	Regulation of TP53 Activity through Methylation	10770	1884	REAC:R-HSA-5633007
query_1	FALSE	0.564597	20	33	2	0.0606061	0.1	REAC:R-HSA-6803204	REAC	TP53 Regulates Transcription of Genes Involved in Cytochrome C Release	10770	2295	REAC:R-HSA-5633008
query_1	FALSE	0.683807	22	33	2	0.0606061	0.0909091	REAC:R-HSA-5205685	REAC	PINK1-PRKN Mediated Mitophagy	10770	1576	REAC:R-HSA-5205647
query_1	FALSE	0.688571	83	33	3	0.0909091	0.0361446	REAC:R-HSA-195253	REAC	Degradation of beta-catenin by the destruction complex	10770	689	REAC:R-HSA-195721
query_1	FALSE	0.882977	25	33	2	0.0606061	0.08	REAC:R-HSA-189445	REAC	Metabolism of porphyrins	10770	1348	REAC:R-HSA-1430728
query_1	FALSE	0.912124	1221	33	10	0.30303	0.00819001	REAC:R-HSA-212436	REAC	Generic Transcription Pathway	10770	984	REAC:R-HSA-73857
query_1	FALSE	1	39	33	2	0.0606061	0.0512821	REAC:R-HSA-5689896	REAC	Ovarian tumor domain proteases	10770	1551	REAC:R-HSA-5688426
query_1	FALSE	1	123	33	1	0.030303	0.00813008	REAC:R-HSA-2559580	REAC	Oxidative Stress Induced Senescence	10770	1552	REAC:R-HSA-2559583
query_1	FALSE	1	66	33	1	0.030303	0.0151515	REAC:R-HSA-1234176	REAC	Oxygen-dependent proline hydroxylation of Hypoxia-inducible Factor Alpha	10770	1553	REAC:R-HSA-1234174
query_1	FALSE	1	92	33	1	0.030303	0.0108696	REAC:R-HSA-4086400	REAC	PCP/CE pathway	10770	1557	REAC:R-HSA-3858494
query_1	FALSE	1	36	33	1	0.030303	0.0277778	REAC:R-HSA-109704	REAC	PI3K Cascade	10770	1569	REAC:R-HSA-112399
query_1	FALSE	1	92	33	1	0.030303	0.0108696	REAC:R-HSA-2219528	REAC	PI3K/AKT Signaling in Cancer	10770	1572	REAC:R-HSA-5663202
query_1	FALSE	1	71	33	1	0.030303	0.0140845	REAC:R-HSA-68949	REAC	Orc1 removal from chromatin	10770	1542	REAC:R-HSA-69052
query_1	FALSE	1	9	33	1	0.030303	0.111111	REAC:R-HSA-198203	REAC	PI3K/AKT activation	10770	1573	REAC:R-HSA-187037
query_1	FALSE	1	252	33	3	0.0909091	0.0119048	REAC:R-HSA-1257604	REAC	PIP3 activates AKT signaling	10770	1577	REAC:R-HSA-9006925
query_1	FALSE	1	113	33	1	0.030303	0.00884956	REAC:R-HSA-1989781	REAC	PPARA activates gene expression	10770	1597	REAC:R-HSA-400206
query_1	FALSE	1	138	33	2	0.0606061	0.0144928	REAC:R-HSA-6807070	REAC	PTEN Regulation	10770	1600	REAC:R-HSA-1257604
query_1	FALSE	1	9	33	1	0.030303	0.111111	REAC:R-HSA-8849469	REAC	PTK6 Regulates RTKs and Their Effectors AKT1 and DOK1	10770	1607	REAC:R-HSA-8848021
query_1	FALSE	1	60	33	1	0.030303	0.0166667	REAC:R-HSA-9033241	REAC	Peroxisomal protein import	10770	1624	REAC:R-HSA-9609507
query_1	FALSE	1	106	33	2	0.0606061	0.0188679	REAC:R-HSA-156580	REAC	Phase II - Conjugation of compounds	10770	1634	REAC:R-HSA-211859
query_1	FALSE	1	92	33	1	0.030303	0.0108696	REAC:R-HSA-6811558	REAC	PI5P, PP2A and IER3 Regulate PI3K/AKT Signaling	10770	1575	REAC:R-HSA-199418
query_1	FALSE	1	210	33	1	0.030303	0.0047619	REAC:R-HSA-1483257	REAC	Phospholipid metabolism	10770	1644	REAC:R-HSA-556833
query_1	FALSE	1	33	33	1	0.030303	0.030303	REAC:R-HSA-2559585	REAC	Oncogene Induced Senescence	10770	1538	REAC:R-HSA-2559583
query_1	FALSE	1	109	33	1	0.030303	0.00917431	REAC:R-HSA-5696398	REAC	Nucleotide Excision Repair	10770	1522	REAC:R-HSA-73894
query_1	FALSE	1	25	33	1	0.030303	0.04	REAC:R-HSA-9013507	REAC	NOTCH3 Activation and Transmission of Signal to the Nucleus	10770	1437	REAC:R-HSA-9012852
query_1	FALSE	1	233	33	1	0.030303	0.00429185	REAC:R-HSA-8951664	REAC	Neddylation	10770	1460	REAC:R-HSA-597592
query_1	FALSE	1	26	33	1	0.030303	0.0384615	REAC:R-HSA-5654726	REAC	Negative regulation of FGFR1 signaling	10770	1469	REAC:R-HSA-5654736
query_1	FALSE	1	28	33	1	0.030303	0.0357143	REAC:R-HSA-5654727	REAC	Negative regulation of FGFR2 signaling	10770	1470	REAC:R-HSA-5654738
query_1	FALSE	1	23	33	1	0.030303	0.0434783	REAC:R-HSA-5654732	REAC	Negative regulation of FGFR3 signaling	10770	1471	REAC:R-HSA-5654741
query_1	FALSE	1	27	33	1	0.030303	0.037037	REAC:R-HSA-5654733	REAC	Negative regulation of FGFR4 signaling	10770	1472	REAC:R-HSA-5654743
query_1	FALSE	1	56	33	2	0.0606061	0.0357143	REAC:R-HSA-168643	REAC	Nucleotide-binding domain, leucine rich repeat containing receptor (NLR) signaling pathways	10770	1528	REAC:R-HSA-168249
query_1	FALSE	1	15	33	1	0.030303	0.0666667	REAC:R-HSA-9706369	REAC	Negative regulation of FLT3	10770	1473	REAC:R-HSA-9607240
query_1	FALSE	1	20	33	1	0.030303	0.05	REAC:R-HSA-6807004	REAC	Negative regulation of MET activity	10770	1475	REAC:R-HSA-6806834
query_1	FALSE	1	53	33	1	0.030303	0.0188679	REAC:R-HSA-9604323	REAC	Negative regulation of NOTCH4 signaling	10770	1477	REAC:R-HSA-9013694
query_1	FALSE	1	99	33	1	0.030303	0.010101	REAC:R-HSA-199418	REAC	Negative regulation of the PI3K/AKT network	10770	1481	REAC:R-HSA-1257604
query_1	FALSE	1	35	33	2	0.0606061	0.0571429	REAC:R-HSA-936440	REAC	Negative regulators of DDX58/IFIH1 signaling	10770	1482	REAC:R-HSA-168928
query_1	FALSE	1	574	33	2	0.0606061	0.00348432	REAC:R-HSA-9675108	REAC	Nervous system development	10770	1484	REAC:R-HSA-1266738
query_1	FALSE	1	61	33	1	0.030303	0.0163934	REAC:R-HSA-198725	REAC	Nuclear Events (kinase and transcription factor activation)	10770	1514	REAC:R-HSA-187037
query_1	FALSE	1	42	33	1	0.030303	0.0238095	REAC:R-HSA-5675221	REAC	Negative regulation of MAPK pathway	10770	1474	REAC:R-HSA-5673001
query_1	FALSE	1	22	33	1	0.030303	0.0454545	REAC:R-HSA-2979096	REAC	NOTCH2 Activation and Transmission of Signal to the Nucleus	10770	1435	REAC:R-HSA-1980145
query_1	FALSE	1	1414	33	3	0.0909091	0.00212164	REAC:R-HSA-597592	REAC	Post-translational protein modification	10770	1672	REAC:R-HSA-392499
query_1	FALSE	1	237	33	1	0.030303	0.00421941	REAC:R-HSA-72203	REAC	Processing of Capped Intron-Containing Pre-mRNA	10770	1691	REAC:R-HSA-8953854
query_1	FALSE	1	53	33	1	0.030303	0.0188679	REAC:R-HSA-169911	REAC	Regulation of Apoptosis	10770	1856	REAC:R-HSA-109581
query_1	FALSE	1	11	33	1	0.030303	0.0909091	REAC:R-HSA-9708530	REAC	Regulation of BACH1 activity	10770	1857	REAC:R-HSA-9755511
query_1	FALSE	1	21	33	1	0.030303	0.047619	REAC:R-HSA-4641263	REAC	Regulation of FZD by ubiquitination	10770	1860	REAC:R-HSA-201681
query_1	FALSE	1	65	33	2	0.0606061	0.0307692	REAC:R-HSA-9707587	REAC	Regulation of HMOX1 expression and activity	10770	1862	REAC:R-HSA-9707564
query_1	FALSE	1	85	33	1	0.030303	0.0117647	REAC:R-HSA-2565942	REAC	Regulation of PLK1 Activity at G2/M Transition	10770	1870	REAC:R-HSA-69275
query_1	FALSE	1	9	33	1	0.030303	0.111111	REAC:R-HSA-8948747	REAC	Regulation of PTEN localization	10770	1872	REAC:R-HSA-6807070
query_1	FALSE	1	81	33	1	0.030303	0.0123457	REAC:R-HSA-176408	REAC	Regulation of APC/C activators between G1/S and early anaphase	10770	1855	REAC:R-HSA-174143
query_1	FALSE	1	69	33	2	0.0606061	0.0289855	REAC:R-HSA-8948751	REAC	Regulation of PTEN stability and activity	10770	1874	REAC:R-HSA-6807070
query_1	FALSE	1	71	33	1	0.030303	0.0140845	REAC:R-HSA-8939902	REAC	Regulation of RUNX2 expression and activity	10770	1877	REAC:R-HSA-8878166
query_1	FALSE	1	54	33	1	0.030303	0.0185185	REAC:R-HSA-8941858	REAC	Regulation of RUNX3 expression and activity	10770	1878	REAC:R-HSA-8878159
query_1	FALSE	1	33	33	1	0.030303	0.030303	REAC:R-HSA-5357905	REAC	Regulation of TNFR1 signaling	10770	1880	REAC:R-HSA-75893
query_1	FALSE	1	92	33	2	0.0606061	0.0217391	REAC:R-HSA-6804756	REAC	Regulation of TP53 Activity through Phosphorylation	10770	1885	REAC:R-HSA-5633007
query_1	FALSE	1	36	33	2	0.0606061	0.0555556	REAC:R-HSA-6804757	REAC	Regulation of TP53 Degradation	10770	1886	REAC:R-HSA-6806003
query_1	FALSE	1	37	33	2	0.0606061	0.0540541	REAC:R-HSA-6806003	REAC	Regulation of TP53 Expression and Degradation	10770	1888	REAC:R-HSA-5633007
query_1	FALSE	1	67	33	1	0.030303	0.0149254	REAC:R-HSA-5658442	REAC	Regulation of RAS by GAPs	10770	1875	REAC:R-HSA-5673001
query_1	FALSE	1	9	33	1	0.030303	0.111111	REAC:R-HSA-9636383	REAC	Prevention of phagosomal-lysosomal fusion	10770	1689	REAC:R-HSA-9637687
query_1	FALSE	1	55	33	1	0.030303	0.0181818	REAC:R-HSA-5218859	REAC	Regulated Necrosis	10770	1851	REAC:R-HSA-5357801
query_1	FALSE	1	30	33	1	0.030303	0.0333333	REAC:R-HSA-110314	REAC	Recognition of DNA damage by PCNA-containing replication complex	10770	1840	REAC:R-HSA-73893
query_1	FALSE	1	98	33	1	0.030303	0.0102041	REAC:R-HSA-5693607	REAC	Processing of DNA double-strand break ends	10770	1693	REAC:R-HSA-5693567
query_1	FALSE	1	205	33	2	0.0606061	0.0097561	REAC:R-HSA-5357801	REAC	Programmed Cell Death	10770	1698	REAC:0000000
query_1	FALSE	1	158	33	3	0.0909091	0.0189873	REAC:R-HSA-9609507	REAC	Protein localization	10770	1707	REAC:0000000
query_1	FALSE	1	78	33	1	0.030303	0.0128205	REAC:R-HSA-8852135	REAC	Protein ubiquitination	10770	1710	REAC:R-HSA-597592
query_1	FALSE	1	26	33	1	0.030303	0.0384615	REAC:R-HSA-9660826	REAC	Purinergic signaling in leishmaniasis infection	10770	1718	REAC:R-HSA-9664424
query_1	FALSE	1	88	33	1	0.030303	0.0113636	REAC:R-HSA-8876198	REAC	RAB GEFs exchange GTP for GDP on RABs	10770	1727	REAC:R-HSA-9007101
query_1	FALSE	1	77	33	1	0.030303	0.012987	REAC:R-HSA-5693565	REAC	Recruitment and ATM-mediated phosphorylation of repair and signaling proteins at DNA double strand breaks	10770	1841	REAC:R-HSA-5693606
query_1	FALSE	1	264	33	2	0.0606061	0.00757576	REAC:R-HSA-5673001	REAC	RAF/MAP kinase cascade	10770	1734	REAC:R-HSA-5684996
query_1	FALSE	1	38	33	1	0.030303	0.0263158	REAC:R-HSA-8853659	REAC	RET signaling	10770	1738	REAC:R-HSA-422475
query_1	FALSE	1	28	33	1	0.030303	0.0357143	REAC:R-HSA-5213460	REAC	RIPK1-mediated regulated necrosis	10770	1770	REAC:R-HSA-5218859
query_1	FALSE	1	1342	33	10	0.30303	0.00745156	REAC:R-HSA-73857	REAC	RNA Polymerase II Transcription	10770	1783	REAC:R-HSA-74160
query_1	FALSE	1	130	33	2	0.0606061	0.0153846	REAC:R-HSA-8939236	REAC	RUNX1 regulates transcription of genes involved in differentiation of HSCs	10770	1814	REAC:R-HSA-8878171
query_1	FALSE	1	120	33	1	0.030303	0.00833333	REAC:R-HSA-9007101	REAC	Rab regulation of trafficking	10770	1831	REAC:R-HSA-199991
query_1	FALSE	1	9	33	1	0.030303	0.111111	REAC:R-HSA-8934903	REAC	Receptor Mediated Mitophagy	10770	1836	REAC:R-HSA-5205647
query_1	FALSE	1	24	33	1	0.030303	0.0416667	REAC:R-HSA-9648002	REAC	RAS processing	10770	1736	REAC:R-HSA-5673001
query_1	FALSE	1	50	33	1	0.030303	0.02	REAC:R-HSA-211733	REAC	Regulation of activated PAK-2p34 by proteasome mediated degradation	10770	1890	REAC:R-HSA-169911
query_1	FALSE	1	46	33	1	0.030303	0.0217391	REAC:R-HSA-2122947	REAC	NOTCH1 Intracellular Domain Regulates Transcription	10770	1434	REAC:R-HSA-1980143
query_1	FALSE	1	59	33	1	0.030303	0.0169492	REAC:R-HSA-5676590	REAC	NIK-->noncanonical NF-kB signaling	10770	1430	REAC:R-HSA-5668541
query_1	FALSE	1	47	33	1	0.030303	0.0212766	REAC:R-HSA-512988	REAC	Interleukin-3, Interleukin-5 and GM-CSF signaling	10770	1177	REAC:R-HSA-449147
query_1	FALSE	1	110	33	2	0.0606061	0.0181818	REAC:R-HSA-6785807	REAC	Interleukin-4 and Interleukin-13 signaling	10770	1183	REAC:R-HSA-449147
query_1	FALSE	1	36	33	1	0.030303	0.0277778	REAC:R-HSA-1266695	REAC	Interleukin-7 signaling	10770	1186	REAC:R-HSA-449147
query_1	FALSE	1	292	33	3	0.0909091	0.010274	REAC:R-HSA-9006925	REAC	Intracellular signaling by second messengers	10770	1197	REAC:R-HSA-162582
query_1	FALSE	1	54	33	1	0.030303	0.0185185	REAC:R-HSA-109606	REAC	Intrinsic Pathway for Apoptosis	10770	1199	REAC:R-HSA-109581
query_1	FALSE	1	182	33	1	0.030303	0.00549451	REAC:R-HSA-983712	REAC	Ion channel transport	10770	1203	REAC:R-HSA-382551
[truncated: 375 more rows]
