# Supplementary material for: Predicting clinical response to everolimus in ER+ breast cancers using machine-learning
Source: Front Mol Biosci. 2022 Oct 11;9:981962. doi: 10.3389/fmolb.2022.981962 (PMC9592823; doi:10.3389/fmolb.2022.981962)
Supplement: Supplementary file 2 [file Table3.XLSX]

## Sheet: Supp_Table_3
query	significant	p_value	term_size	query_size	intersection_size	precision	recall	term_id	source	term_name	effective_domain_size	source_order	parents
query_1	TRUE	0.000530789	304	32	7	0.21875	0.0230263	GO:0042254	GO:BP	ribosome biogenesis	21100	11632	GO:0022613
query_1	TRUE	0.0027874	568	32	8	0.25	0.0140845	GO:0034660	GO:BP	ncRNA metabolic process	21100	10010	GO:0016070
query_1	TRUE	0.0052969	429	32	7	0.21875	0.016317	GO:0034470	GO:BP	ncRNA processing	21100	9936	c("GO:0006396", "GO:0034660")
query_1	TRUE	0.00786696	73	32	4	0.125	0.0547945	GO:0042274	GO:BP	ribosomal small subunit biogenesis	21100	11646	c("GO:0022613", "GO:0042254")
query_1	FALSE	0.105652	50	32	3	0.09375	0.06	GO:0030490	GO:BP	maturation of SSU-rRNA	21100	7870	c("GO:0006364", "GO:0042274")
query_1	FALSE	0.257486	8165	32	23	0.71875	0.0028169	GO:0046483	GO:BP	heterocycle metabolic process	21100	14160	GO:0044237
query_1	FALSE	0.260139	12	32	2	0.0625	0.166667	GO:0046606	GO:BP	negative regulation of centrosome cycle	21100	14233	c("GO:0007098", "GO:0010948", "GO:0046605", "GO:0051494")
query_1	FALSE	0.260139	12	32	2	0.0625	0.166667	GO:0010826	GO:BP	negative regulation of centrosome duplication	21100	4960	c("GO:0010824", "GO:0046606", "GO:0051298")
query_1	FALSE	0.29264	8224	32	23	0.71875	0.00279669	GO:0006725	GO:BP	cellular aromatic compound metabolic process	21100	2692	GO:0044237
query_1	FALSE	0.482841	8461	32	23	0.71875	0.00271835	GO:1901360	GO:BP	organic cyclic compound metabolic process	21100	24665	GO:0071704
query_1	FALSE	0.650294	226	32	4	0.125	0.0176991	GO:0006364	GO:BP	rRNA processing	21100	2361	c("GO:0016072", "GO:0034470", "GO:0042254")
query_1	FALSE	0.954879	105	32	3	0.09375	0.0285714	GO:0048024	GO:BP	regulation of mRNA splicing, via spliceosome	21100	14500	c("GO:0000398", "GO:0043484", "GO:0050684")
query_1	FALSE	0.989383	7540	32	21	0.65625	0.00278515	GO:0090304	GO:BP	nucleic acid metabolic process	21100	21315	c("GO:0006139", "GO:0043170")
query_1	FALSE	1	33	32	1	0.03125	0.030303	GO:0051642	GO:BP	centrosome localization	21100	16001	GO:0061842
query_1	FALSE	1	542	32	3	0.09375	0.00553506	GO:0051640	GO:BP	organelle localization	21100	15999	GO:0051641
query_1	FALSE	1	313	32	1	0.03125	0.00319489	GO:0051604	GO:BP	protein maturation	21100	15967	c("GO:0010467", "GO:0019538")
query_1	FALSE	1	104	32	1	0.03125	0.00961538	GO:0051588	GO:BP	regulation of neurotransmitter transport	21100	15951	c("GO:0006836", "GO:0051049")
query_1	FALSE	1	17	32	1	0.03125	0.0588235	GO:0051580	GO:BP	regulation of neurotransmitter uptake	21100	15943	c("GO:0001504", "GO:0001505", "GO:0051588")
query_1	FALSE	1	50	32	1	0.03125	0.02	GO:0051646	GO:BP	mitochondrion localization	21100	16005	GO:0051640
query_1	FALSE	1	3031	32	7	0.21875	0.00230947	GO:0051641	GO:BP	cellular localization	21100	16000	c("GO:0009987", "GO:0051179")
query_1	FALSE	1	1089	32	4	0.125	0.00367309	GO:0051726	GO:BP	regulation of cell cycle	21100	16066	c("GO:0007049", "GO:0050794")
query_1	FALSE	1	410	32	1	0.03125	0.00243902	GO:0051656	GO:BP	establishment of organelle localization	21100	16015	c("GO:0051234", "GO:0051640")
query_1	FALSE	1	1507	32	1	0.03125	0.00066357	GO:0051707	GO:BP	response to other organism	21100	16056	c("GO:0043207", "GO:0044419")
query_1	FALSE	1	7399	32	6	0.1875	0.00081092	GO:0051716	GO:BP	cellular response to stimulus	21100	16064	c("GO:0009987", "GO:0050896")
query_1	FALSE	1	8	32	1	0.03125	0.125	GO:0051933	GO:BP	amino acid neurotransmitter reuptake	21100	16195	c("GO:0006865", "GO:0098810")
query_1	FALSE	1	4	32	1	0.03125	0.25	GO:0051935	GO:BP	glutamate reuptake	21100	16197	c("GO:0051933", "GO:0098712")
query_1	FALSE	1	29	32	1	0.03125	0.0344828	GO:0051938	GO:BP	L-glutamate import	21100	16200	c("GO:0006835", "GO:0015800", "GO:0015807")
query_1	FALSE	1	3	32	1	0.03125	0.333333	GO:0051941	GO:BP	regulation of amino acid uptake involved in synaptic transmission	21100	16203	c("GO:0051580", "GO:0051933", "GO:0051955")
query_1	FALSE	1	3	32	1	0.03125	0.333333	GO:0051946	GO:BP	regulation of glutamate uptake involved in transmission of nerve impulse	21100	16208	c("GO:0002036", "GO:0051935", "GO:0051941")
query_1	FALSE	1	93	32	1	0.03125	0.0107527	GO:0051952	GO:BP	regulation of amine transport	21100	16214	c("GO:0015837", "GO:0051049")
query_1	FALSE	1	41	32	1	0.03125	0.0243902	GO:0051955	GO:BP	regulation of amino acid transport	21100	16217	c("GO:0006865", "GO:0032890", "GO:0051952")
query_1	FALSE	1	1	32	1	0.03125	1	GO:0051958	GO:BP	methotrexate transport	21100	16220	c("GO:0006835", "GO:0015849", "GO:0042886")
query_1	FALSE	1	437	32	3	0.09375	0.00686499	GO:0051960	GO:BP	regulation of nervous system development	21100	16221	c("GO:0007399", "GO:2000026")
query_1	FALSE	1	270	32	2	0.0625	0.00740741	GO:0051962	GO:BP	positive regulation of nervous system development	21100	16223	c("GO:0007399", "GO:0051094", "GO:0051240", "GO:0051960")
query_1	FALSE	1	103	32	1	0.03125	0.00970874	GO:0051963	GO:BP	regulation of synapse assembly	21100	16224	c("GO:0007416", "GO:0050807", "GO:1901888")
query_1	FALSE	1	2196	32	5	0.15625	0.00227687	GO:0051649	GO:BP	establishment of localization in cell	21100	16008	c("GO:0051234", "GO:0051641")
query_1	FALSE	1	28	32	1	0.03125	0.0357143	GO:0051503	GO:BP	adenine nucleotide transport	21100	15893	GO:0015865
query_1	FALSE	1	1527	32	3	0.09375	0.00196464	GO:0000003	GO:BP	reproduction	21100	3	GO:0008150
query_1	FALSE	1	529	32	2	0.0625	0.00378072	GO:0051493	GO:BP	regulation of cytoskeleton organization	21100	15886	c("GO:0007010", "GO:0033043")
query_1	FALSE	1	6436	32	8	0.25	0.00124301	GO:0051179	GO:BP	localization	21100	15648	GO:0008150
query_1	FALSE	1	3083	32	8	0.25	0.00259488	GO:0051173	GO:BP	positive regulation of nitrogen compound metabolic process	21100	15642	c("GO:0006807", "GO:0009893", "GO:0051171")
query_1	FALSE	1	2371	32	9	0.28125	0.00379587	GO:0051172	GO:BP	negative regulation of nitrogen compound metabolic process	21100	15641	c("GO:0006807", "GO:0009892", "GO:0051171")
query_1	FALSE	1	5654	32	14	0.4375	0.00247612	GO:0051171	GO:BP	regulation of nitrogen compound metabolic process	21100	15640	c("GO:0006807", "GO:0019222")
query_1	FALSE	1	167	32	1	0.03125	0.00598802	GO:0051170	GO:BP	import into nucleus	21100	15639	GO:0006913
query_1	FALSE	1	313	32	2	0.0625	0.00638978	GO:0051169	GO:BP	nuclear transport	21100	15638	GO:0046907
query_1	FALSE	1	155	32	1	0.03125	0.00645161	GO:0051168	GO:BP	nuclear export	21100	15637	GO:0006913
query_1	FALSE	1	43	32	1	0.03125	0.0232558	GO:0051155	GO:BP	positive regulation of striated muscle cell differentiation	21100	15624	c("GO:0051146", "GO:0051149", "GO:0051153")
query_1	FALSE	1	82	32	1	0.03125	0.0121951	GO:0051153	GO:BP	regulation of striated muscle cell differentiation	21100	15622	c("GO:0051146", "GO:0051147")
query_1	FALSE	1	59	32	1	0.03125	0.0169492	GO:0051149	GO:BP	positive regulation of muscle cell differentiation	21100	15618	c("GO:0042692", "GO:0045597", "GO:0051147")
query_1	FALSE	1	129	32	1	0.03125	0.00775194	GO:0051147	GO:BP	regulation of muscle cell differentiation	21100	15616	c("GO:0042692", "GO:0045595")
query_1	FALSE	1	268	32	1	0.03125	0.00373134	GO:0051146	GO:BP	striated muscle cell differentiation	21100	15615	GO:0042692
query_1	FALSE	1	1046	32	2	0.0625	0.00191205	GO:0051130	GO:BP	positive regulation of cellular component organization	21100	15600	c("GO:0016043", "GO:0048522", "GO:0051128")
query_1	FALSE	1	678	32	3	0.09375	0.00442478	GO:0051129	GO:BP	negative regulation of cellular component organization	21100	15599	c("GO:0016043", "GO:0048523", "GO:0051128")
query_1	FALSE	1	2276	32	3	0.09375	0.0013181	GO:0051128	GO:BP	regulation of cellular component organization	21100	15598	c("GO:0016043", "GO:0050794")
query_1	FALSE	1	45	32	1	0.03125	0.0222222	GO:0051180	GO:BP	vitamin transport	21100	15649	GO:0006810
query_1	FALSE	1	165	32	2	0.0625	0.0121212	GO:0051494	GO:BP	negative regulation of cytoskeleton organization	21100	15887	c("GO:0007010", "GO:0010639", "GO:0051493")
query_1	FALSE	1	199	32	1	0.03125	0.00502513	GO:0051216	GO:BP	cartilage development	21100	15678	c("GO:0001501", "GO:0048513", "GO:0061448")
query_1	FALSE	1	4903	32	6	0.1875	0.00122374	GO:0051234	GO:BP	establishment of localization	21100	15692	GO:0051179
query_1	FALSE	1	186	32	1	0.03125	0.00537634	GO:0051302	GO:BP	regulation of cell division	21100	15745	c("GO:0050794", "GO:0051301")
query_1	FALSE	1	646	32	1	0.03125	0.00154799	GO:0051301	GO:BP	cell division	21100	15744	GO:0009987
query_1	FALSE	1	63	32	1	0.03125	0.015873	GO:0051965	GO:BP	positive regulation of synapse assembly	21100	16226	c("GO:0007416", "GO:0051962", "GO:0051963", "GO:1901890")
query_1	FALSE	1	27	32	1	0.03125	0.037037	GO:0051291	GO:BP	protein heterooligomerization	21100	15735	GO:0051259
query_1	FALSE	1	1059	32	2	0.0625	0.00188857	GO:0051276	GO:BP	chromosome organization	21100	15725	GO:0006996
query_1	FALSE	1	253	32	1	0.03125	0.00395257	GO:0051259	GO:BP	protein complex oligomerization	21100	15714	GO:0065003
query_1	FALSE	1	1769	32	8	0.25	0.00452233	GO:0051254	GO:BP	positive regulation of RNA metabolic process	21100	15709	c("GO:0010604", "GO:0016070", "GO:0045935", "GO:0051252")
query_1	FALSE	1	1409	32	8	0.25	0.00567779	GO:0051253	GO:BP	negative regulation of RNA metabolic process	21100	15708	c("GO:0010605", "GO:0016070", "GO:0045934", "GO:0051252")
query_1	FALSE	1	3753	32	14	0.4375	0.00373035	GO:0051252	GO:BP	regulation of RNA metabolic process	21100	15707	c("GO:0016070", "GO:0019219", "GO:0060255")
query_1	FALSE	1	529	32	1	0.03125	0.00189036	GO:0051249	GO:BP	regulation of lymphocyte activation	21100	15704	c("GO:0002694", "GO:0046649")
query_1	FALSE	1	1034	32	3	0.09375	0.00290135	GO:0051248	GO:BP	negative regulation of protein metabolic process	21100	15703	c("GO:0010605", "GO:0019538", "GO:0051172", "GO:0051246")
query_1	FALSE	1	1493	32	1	0.03125	0.000669792	GO:0051247	GO:BP	positive regulation of protein metabolic process	21100	15702	c("GO:0010604", "GO:0019538", "GO:0051173", "GO:0051246")
query_1	FALSE	1	2536	32	4	0.125	0.00157729	GO:0051246	GO:BP	regulation of protein metabolic process	21100	15701	c("GO:0019538", "GO:0051171", "GO:0060255", "GO:0080090")
query_1	FALSE	1	1434	32	5	0.15625	0.00348675	GO:0051240	GO:BP	positive regulation of multicellular organismal process	21100	15698	c("GO:0032501", "GO:0048518", "GO:0051239")
query_1	FALSE	1	2666	32	5	0.15625	0.00187547	GO:0051239	GO:BP	regulation of multicellular organismal process	21100	15697	c("GO:0032501", "GO:0050789")
query_1	FALSE	1	498	32	1	0.03125	0.00200803	GO:0051223	GO:BP	regulation of protein transport	21100	15684	c("GO:0015031", "GO:0051049", "GO:0070201")
query_1	FALSE	1	73	32	2	0.0625	0.0273973	GO:0051298	GO:BP	centrosome duplication	21100	15741	c("GO:0007098", "GO:0022402")
query_1	FALSE	1	658	32	1	0.03125	0.00151976	GO:0055082	GO:BP	cellular chemical homeostasis	21100	16786	c("GO:0019725", "GO:0048878")
query_1	FALSE	1	511	32	1	0.03125	0.00195695	GO:0055065	GO:BP	metal ion homeostasis	21100	16770	c("GO:0055080", "GO:0098771")
query_1	FALSE	1	523	32	1	0.03125	0.00191205	GO:0070201	GO:BP	regulation of establishment of protein localization	21100	18713	c("GO:0032880", "GO:0045184")
query_1	FALSE	1	12	32	1	0.03125	0.0833333	GO:0070341	GO:BP	fat cell proliferation	21100	18803	GO:0008283
query_1	FALSE	1	10	32	1	0.03125	0.1	GO:0070344	GO:BP	regulation of fat cell proliferation	21100	18806	c("GO:0042127", "GO:0070341")
query_1	FALSE	1	6	32	1	0.03125	0.166667	GO:0070345	GO:BP	negative regulation of fat cell proliferation	21100	18807	c("GO:0008285", "GO:0070341", "GO:0070344")
query_1	FALSE	1	15	32	1	0.03125	0.0666667	GO:0070365	GO:BP	hepatocyte differentiation	21100	18818	c("GO:0001889", "GO:0030855")
query_1	FALSE	1	339	32	1	0.03125	0.00294985	GO:0070482	GO:BP	response to oxygen levels	21100	18886	GO:0009628
query_1	FALSE	1	204	32	1	0.03125	0.00490196	GO:0070646	GO:BP	protein modification by small protein removal	21100	18982	c("GO:0006508", "GO:0070647")
query_1	FALSE	1	1067	32	4	0.125	0.00374883	GO:0070647	GO:BP	protein modification by small protein conjugation or removal	21100	18983	GO:0006464
query_1	FALSE	1	1922	32	4	0.125	0.00208117	GO:0070727	GO:BP	cellular macromolecule localization	21100	19028	c("GO:0033036", "GO:0051641")
query_1	FALSE	1	6	32	1	0.03125	0.166667	GO:0070729	GO:BP	cyclic nucleotide transport	21100	19029	GO:0006862
query_1	FALSE	1	685	32	1	0.03125	0.00145985	GO:0070848	GO:BP	response to growth factor	21100	19096	GO:0010033
query_1	FALSE	1	3019	32	5	0.15625	0.00165618	GO:0070887	GO:BP	cellular response to chemical stimulus	21100	19115	c("GO:0042221", "GO:0051716")
query_1	FALSE	1	52	32	1	0.03125	0.0192308	GO:0070918	GO:BP	primary sncRNA processing	21100	19132	c("GO:0031047", "GO:0034470")
query_1	FALSE	1	900	32	2	0.0625	0.00222222	GO:0070925	GO:BP	organelle assembly	21100	19137	c("GO:0006996", "GO:0022607")
query_1	FALSE	1	13	32	1	0.03125	0.0769231	GO:0070932	GO:BP	histone H3 deacetylation	21100	19143	GO:0016575
query_1	FALSE	1	75	32	2	0.0625	0.0266667	GO:0070988	GO:BP	demethylation	21100	19186	GO:0008152
query_1	FALSE	1	1	32	1	0.03125	1	GO:0071215	GO:BP	cellular response to abscisic acid stimulus	21100	19250	c("GO:0009737", "GO:0032870", "GO:0071396", "GO:0097306")
query_1	FALSE	1	347	32	2	0.0625	0.00576369	GO:0071692	GO:BP	protein localization to extracellular region	21100	19671	GO:0008104
query_1	FALSE	1	1316	32	3	0.09375	0.00227964	GO:0071495	GO:BP	cellular response to endogenous stimulus	21100	19516	GO:0009719
query_1	FALSE	1	168	32	1	0.03125	0.00595238	GO:0071466	GO:BP	cellular response to xenobiotic stimulus	21100	19487	c("GO:0009410", "GO:0070887")
query_1	FALSE	1	626	32	1	0.03125	0.00159744	GO:0071417	GO:BP	cellular response to organonitrogen compound	21100	19446	c("GO:0010243", "GO:0071310", "GO:0071495", "GO:1901699")
query_1	FALSE	1	569	32	1	0.03125	0.00175747	GO:0071407	GO:BP	cellular response to organic cyclic compound	21100	19436	c("GO:0014070", "GO:0071310")
query_1	FALSE	1	573	32	1	0.03125	0.0017452	GO:0071396	GO:BP	cellular response to lipid	21100	19425	c("GO:0033993", "GO:0071310")
query_1	FALSE	1	3050	32	3	0.09375	0.000983607	GO:0065009	GO:BP	regulation of molecular function	21100	18614	GO:0065007
query_1	FALSE	1	288	32	1	0.03125	0.00347222	GO:0071375	GO:BP	cellular response to peptide hormone stimulus	21100	19404	c("GO:0032870", "GO:0043434", "GO:1901653")
query_1	FALSE	1	242	32	1	0.03125	0.00413223	GO:0071356	GO:BP	cellular response to tumor necrosis factor	21100	19385	c("GO:0034612", "GO:0071345")
query_1	FALSE	1	831	32	2	0.0625	0.00240674	GO:0071345	GO:BP	cellular response to cytokine stimulus	21100	19374	c("GO:0034097", "GO:0071310")
query_1	FALSE	1	2391	32	5	0.15625	0.00209118	GO:0071310	GO:BP	cellular response to organic substance	21100	19341	c("GO:0010033", "GO:0070887")
query_1	FALSE	1	26	32	1	0.03125	0.0384615	GO:0071280	GO:BP	cellular response to copper ion	21100	19311	c("GO:0046688", "GO:0071248")
query_1	FALSE	1	191	32	1	0.03125	0.0052356	GO:0071248	GO:BP	cellular response to metal ion	21100	19283	c("GO:0010038", "GO:0071241")
query_1	FALSE	1	221	32	1	0.03125	0.00452489	GO:0071241	GO:BP	cellular response to inorganic substance	21100	19276	c("GO:0010035", "GO:0070887")
query_1	FALSE	1	655	32	1	0.03125	0.00152672	GO:0071363	GO:BP	cellular response to growth factor stimulus	21100	19392	c("GO:0070848", "GO:0071310")
query_1	FALSE	1	106	32	1	0.03125	0.00943396	GO:0055007	GO:BP	cardiac muscle cell differentiation	21100	16735	c("GO:0035051", "GO:0048738", "GO:0051146")
query_1	FALSE	1	3768	32	7	0.21875	0.00185775	GO:0065008	GO:BP	regulation of biological quality	21100	18613	GO:0065007
query_1	FALSE	1	3197	32	1	0.03125	0.000312793	GO:0065003	GO:BP	protein-containing complex assembly	21100	18609	c("GO:0022607", "GO:0043933")
query_1	FALSE	1	83	32	1	0.03125	0.0120482	GO:0055072	GO:BP	iron ion homeostasis	21100	16777	GO:0055076
query_1	FALSE	1	136	32	1	0.03125	0.00735294	GO:0055076	GO:BP	transition metal ion homeostasis	21100	16781	GO:0055065
query_1	FALSE	1	587	32	1	0.03125	0.00170358	GO:0055080	GO:BP	cation homeostasis	21100	16784	GO:0050801
query_1	FALSE	1	121	32	1	0.03125	0.00826446	GO:0051101	GO:BP	regulation of DNA binding	21100	15578	GO:0051098
query_1	FALSE	1	1528	32	2	0.0625	0.0013089	GO:0055085	GO:BP	transmembrane transport	21100	16788	c("GO:0006810", "GO:0009987")
query_1	FALSE	1	20	32	1	0.03125	0.05	GO:0055093	GO:BP	response to hyperoxia	21100	16795	c("GO:0006950", "GO:0036296")
query_1	FALSE	1	143	32	1	0.03125	0.00699301	GO:0055123	GO:BP	digestive system development	21100	16815	GO:0048731
query_1	FALSE	1	7	32	1	0.03125	0.142857	GO:0060137	GO:BP	maternal process involved in parturition	21100	16937	c("GO:0007567", "GO:0048609")
query_1	FALSE	1	178	32	1	0.03125	0.00561798	GO:0060173	GO:BP	limb development	21100	16969	GO:0048736
query_1	FALSE	1	6787	32	14	0.4375	0.00206277	GO:0060255	GO:BP	regulation of macromolecule metabolic process	21100	17032	c("GO:0019222", "GO:0043170")
query_1	FALSE	1	497	32	2	0.0625	0.00402414	GO:0060284	GO:BP	regulation of cell development	21100	17061	c("GO:0045595", "GO:0048468")
query_1	FALSE	1	809	32	3	0.09375	0.00370828	GO:0060322	GO:BP	head development	21100	17097	GO:0048856
query_1	FALSE	1	231	32	1	0.03125	0.004329	GO:0060348	GO:BP	bone development	21100	17122	c("GO:0001501", "GO:0048513")
query_1	FALSE	1	1180	32	2	0.0625	0.00169492	GO:0060429	GO:BP	epithelium development	21100	17195	GO:0009888
query_1	FALSE	1	394	32	1	0.03125	0.00253807	GO:0060537	GO:BP	muscle tissue development	21100	17302	GO:0009888
query_1	FALSE	1	983	32	1	0.03125	0.00101729	GO:0060548	GO:BP	negative regulation of cell death	21100	17313	c("GO:0008219", "GO:0010941", "GO:0048523")
query_1	FALSE	1	331	32	1	0.03125	0.00302115	GO:0060562	GO:BP	epithelial tube morphogenesis	21100	17324	c("GO:0002009", "GO:0035239")
query_1	FALSE	1	139	32	1	0.03125	0.00719424	GO:0062013	GO:BP	positive regulation of small molecule metabolic process	21100	18503	c("GO:0009893", "GO:0044281", "GO:0062012")
query_1	FALSE	1	347	32	1	0.03125	0.00288184	GO:0062012	GO:BP	regulation of small molecule metabolic process	21100	18502	c("GO:0019222", "GO:0044281")
query_1	FALSE	1	541	32	1	0.03125	0.00184843	GO:0061919	GO:BP	process utilizing autophagic mechanism	21100	18439	GO:0009987
query_1	FALSE	1	34	32	1	0.03125	0.0294118	GO:0061842	GO:BP	microtubule organizing center localization	21100	18392	c("GO:0009987", "GO:0051179")
query_1	FALSE	1	16	32	1	0.03125	0.0625	GO:0061684	GO:BP	chaperone-mediated autophagy	21100	18317	c("GO:0006914", "GO:0030163")
query_1	FALSE	1	439	32	1	0.03125	0.0022779	GO:0061458	GO:BP	reproductive system development	21100	18185	GO:0048731
query_1	FALSE	1	13001	32	21	0.65625	0.00161526	GO:0065007	GO:BP	biological regulation	21100	18612	GO:0008150
query_1	FALSE	1	265	32	1	0.03125	0.00377358	GO:0061448	GO:BP	connective tissue development	21100	18176	GO:0009888
query_1	FALSE	1	2	32	1	0.03125	0.5	GO:0061083	GO:BP	regulation of protein refolding	21100	17825	c("GO:0042026", "GO:1903332")
query_1	FALSE	1	621	32	1	0.03125	0.00161031	GO:0061061	GO:BP	muscle structure development	21100	17803	GO:0048856
query_1	FALSE	1	87	32	1	0.03125	0.0114943	GO:0061053	GO:BP	somite development	21100	17795	c("GO:0009790", "GO:0060429")
query_1	FALSE	1	71	32	1	0.03125	0.0140845	GO:0061035	GO:BP	regulation of cartilage development	21100	17778	c("GO:0051216", "GO:2000026")
query_1	FALSE	1	137	32	1	0.03125	0.00729927	GO:0061008	GO:BP	hepaticobiliary system development	21100	17758	GO:0048731
query_1	FALSE	1	94	32	1	0.03125	0.0106383	GO:0060606	GO:BP	tube closure	21100	17365	GO:0035148
query_1	FALSE	1	2	32	1	0.03125	0.5	GO:0061084	GO:BP	negative regulation of protein refolding	21100	17826	c("GO:0042026", "GO:0061083", "GO:1903333")
query_1	FALSE	1	161	32	1	0.03125	0.00621118	GO:0051100	GO:BP	negative regulation of binding	21100	15577	c("GO:0044092", "GO:0051098")
query_1	FALSE	1	342	32	1	0.03125	0.00292398	GO:0050863	GO:BP	regulation of T cell activation	21100	15382	c("GO:0042110", "GO:0051249")
query_1	FALSE	1	1268	32	4	0.125	0.00315457	GO:0051094	GO:BP	positive regulation of developmental process	21100	15571	c("GO:0032502", "GO:0048518", "GO:0050793")
query_1	FALSE	1	1550	32	3	0.09375	0.00193548	GO:0045595	GO:BP	regulation of cell differentiation	21100	13327	c("GO:0030154", "GO:0050793", "GO:0050794")
query_1	FALSE	1	840	32	2	0.0625	0.00238095	GO:0045597	GO:BP	positive regulation of cell differentiation	21100	13329	c("GO:0030154", "GO:0045595", "GO:0048522", "GO:0051094")
query_1	FALSE	1	185	32	1	0.03125	0.00540541	GO:0045619	GO:BP	regulation of lymphocyte differentiation	21100	13351	c("GO:0030098", "GO:0051249", "GO:1902105")
query_1	FALSE	1	16	32	1	0.03125	0.0625	GO:0045722	GO:BP	positive regulation of gluconeogenesis	21100	13450	c("GO:0006094", "GO:0006111", "GO:0010907", "GO:0031328")
query_1	FALSE	1	388	32	2	0.0625	0.00515464	GO:0045786	GO:BP	negative regulation of cell cycle	21100	13512	c("GO:0007049", "GO:0048523", "GO:0051726")
query_1	FALSE	1	347	32	1	0.03125	0.00288184	GO:0045787	GO:BP	positive regulation of cell cycle	21100	13513	c("GO:0007049", "GO:0048522", "GO:0051726")
query_1	FALSE	1	1293	32	7	0.21875	0.00541377	GO:0045892	GO:BP	negative regulation of transcription, DNA-templated	21100	13602	c("GO:0006351", "GO:0006355", "GO:1903507")
query_1	FALSE	1	1636	32	6	0.1875	0.00366748	GO:0045893	GO:BP	positive regulation of transcription, DNA-templated	21100	13603	c("GO:0006351", "GO:0006355", "GO:1903508")
query_1	FALSE	1	73	32	1	0.03125	0.0136986	GO:0045913	GO:BP	positive regulation of carbohydrate metabolic process	21100	13621	c("GO:0005975", "GO:0006109", "GO:0009893")
query_1	FALSE	1	119	32	1	0.03125	0.00840336	GO:0045931	GO:BP	positive regulation of mitotic cell cycle	21100	13639	c("GO:0000278", "GO:0007346", "GO:0045787")
query_1	FALSE	1	1533	32	8	0.25	0.00521853	GO:0045934	GO:BP	negative regulation of nucleobase-containing compound metabolic process	21100	13642	c("GO:0006139", "GO:0019219", "GO:0031324", "GO:0051172")
query_1	FALSE	1	1976	32	8	0.25	0.00404858	GO:0045935	GO:BP	positive regulation of nucleobase-containing compound metabolic process	21100	13643	c("GO:0006139", "GO:0019219", "GO:0031325", "GO:0051173")
query_1	FALSE	1	23	32	1	0.03125	0.0434783	GO:0045943	GO:BP	positive regulation of transcription by RNA polymerase I	21100	13650	c("GO:0006356", "GO:0006360", "GO:0045893")
query_1	FALSE	1	1211	32	3	0.09375	0.00247729	GO:0045944	GO:BP	positive regulation of transcription by RNA polymerase II	21100	13651	c("GO:0006357", "GO:0006366", "GO:0045893")
query_1	FALSE	1	33	32	1	0.03125	0.030303	GO:0045589	GO:BP	regulation of regulatory T cell differentiation	21100	13321	c("GO:0045066", "GO:0045580")
query_1	FALSE	1	86	32	1	0.03125	0.0116279	GO:0045995	GO:BP	regulation of embryonic development	21100	13701	c("GO:0009790", "GO:2000026")
query_1	FALSE	1	306	32	2	0.0625	0.00653595	GO:0046394	GO:BP	carboxylic acid biosynthetic process	21100	14089	c("GO:0016053", "GO:0019752")
query_1	FALSE	1	15	32	1	0.03125	0.0666667	GO:0046500	GO:BP	S-adenosylmethionine metabolic process	21100	14176	c("GO:0006790", "GO:0071704")
query_1	FALSE	1	142	32	1	0.03125	0.00704225	GO:0046546	GO:BP	development of primary male sexual characteristics	21100	14205	c("GO:0045137", "GO:0046661")
query_1	FALSE	1	23	32	1	0.03125	0.0434783	GO:0046599	GO:BP	regulation of centriole replication	21100	14226	c("GO:0007099", "GO:0010824", "GO:1902115")
query_1	FALSE	1	7	32	1	0.03125	0.142857	GO:0046600	GO:BP	negative regulation of centriole replication	21100	14227	c("GO:0007099", "GO:0010826", "GO:0046599", "GO:1902116")
query_1	FALSE	1	52	32	2	0.0625	0.0384615	GO:0046605	GO:BP	regulation of centrosome cycle	21100	14232	c("GO:0007098", "GO:0010564", "GO:0032886", "GO:0051128")
query_1	FALSE	1	63	32	1	0.03125	0.015873	GO:0046626	GO:BP	regulation of insulin receptor signaling pathway	21100	14242	c("GO:0008286", "GO:0009966")
query_1	FALSE	1	32	32	1	0.03125	0.03125	GO:0046627	GO:BP	negative regulation of insulin receptor signaling pathway	21100	14243	c("GO:0008286", "GO:0009968", "GO:0046626", "GO:1900077")
query_1	FALSE	1	794	32	2	0.0625	0.00251889	GO:0046649	GO:BP	lymphocyte activation	21100	14265	GO:0045321
query_1	FALSE	1	14	32	1	0.03125	0.0714286	GO:0046655	GO:BP	folic acid metabolic process	21100	14269	c("GO:0006760", "GO:0006767", "GO:0043603", "GO:0043648")
query_1	FALSE	1	165	32	1	0.03125	0.00606061	GO:0046661	GO:BP	male sex differentiation	21100	14273	c("GO:0007275", "GO:0007548")
query_1	FALSE	1	47	32	1	0.03125	0.0212766	GO:0046677	GO:BP	response to antibiotic	21100	14287	GO:0042221
query_1	FALSE	1	31	32	2	0.0625	0.0645161	GO:0046685	GO:BP	response to arsenic-containing substance	21100	14295	GO:0042221
query_1	FALSE	1	40	32	1	0.03125	0.025	GO:0046688	GO:BP	response to copper ion	21100	14298	GO:0010038
query_1	FALSE	1	83	32	2	0.0625	0.0240964	GO:0046364	GO:BP	monosaccharide biosynthetic process	21100	14061	c("GO:0005996", "GO:0016051", "GO:0044283")
query_1	FALSE	1	481	32	1	0.03125	0.002079	GO:0046700	GO:BP	heterocycle catabolic process	21100	14305	c("GO:0044248", "GO:0046483")
query_1	FALSE	1	154	32	1	0.03125	0.00649351	GO:0045580	GO:BP	regulation of T cell differentiation	21100	13312	c("GO:0030217", "GO:0045619", "GO:0050863")
query_1	FALSE	1	953	32	2	0.0625	0.00209864	GO:0045321	GO:BP	leukocyte activation	21100	13217	c("GO:0001775", "GO:0002376")
query_1	FALSE	1	92	32	1	0.03125	0.0108696	GO:0044070	GO:BP	regulation of anion transport	21100	12613	c("GO:0006820", "GO:0043269")
query_1	FALSE	1	4834	32	11	0.34375	0.00227555	GO:0044085	GO:BP	cellular component biogenesis	21100	12627	GO:0071840
query_1	FALSE	1	946	32	2	0.0625	0.00211416	GO:0044087	GO:BP	regulation of cellular component biogenesis	21100	12628	c("GO:0044085", "GO:0050794")
query_1	FALSE	1	497	32	1	0.03125	0.00201207	GO:0044089	GO:BP	positive regulation of cellular component biogenesis	21100	12630	c("GO:0044085", "GO:0044087", "GO:0048522")
query_1	FALSE	1	1112	32	1	0.03125	0.000899281	GO:0044092	GO:BP	negative regulation of molecular function	21100	12633	GO:0065009
query_1	FALSE	1	21	32	1	0.03125	0.047619	GO:0044154	GO:BP	histone H3-K14 acetylation	21100	12673	GO:0043966
query_1	FALSE	1	12865	32	25	0.78125	0.00194326	GO:0044237	GO:BP	cellular metabolic process	21100	12684	c("GO:0008152", "GO:0009987")
query_1	FALSE	1	12674	32	21	0.65625	0.00165694	GO:0044238	GO:BP	primary metabolic process	21100	12685	GO:0008152
query_1	FALSE	1	2199	32	2	0.0625	0.000909504	GO:0044248	GO:BP	cellular catabolic process	21100	12691	c("GO:0009056", "GO:0044237")
query_1	FALSE	1	5700	32	15	0.46875	0.00263158	GO:0044249	GO:BP	cellular biosynthetic process	21100	12692	c("GO:0009058", "GO:0044237")
query_1	FALSE	1	1009	32	2	0.0625	0.00198216	GO:0044255	GO:BP	cellular lipid metabolic process	21100	12695	c("GO:0006629", "GO:0044237")
query_1	FALSE	1	5766	32	8	0.25	0.00138744	GO:0044260	GO:BP	cellular macromolecule metabolic process	21100	12699	c("GO:0043170", "GO:0044237")
query_1	FALSE	1	285	32	2	0.0625	0.00701754	GO:0044262	GO:BP	cellular carbohydrate metabolic process	21100	12700	c("GO:0005975", "GO:0044237")
query_1	FALSE	1	96	32	1	0.03125	0.0104167	GO:0044264	GO:BP	cellular polysaccharide metabolic process	21100	12701	c("GO:0005976", "GO:0044260", "GO:0044262")
query_1	FALSE	1	232	32	1	0.03125	0.00431034	GO:0045444	GO:BP	fat cell differentiation	21100	13243	GO:0030154
query_1	FALSE	1	4882	32	6	0.1875	0.001229	GO:0044267	GO:BP	cellular protein metabolic process	21100	12703	c("GO:0019538", "GO:0044260")
query_1	FALSE	1	152	32	1	0.03125	0.00657895	GO:0044272	GO:BP	sulfur compound biosynthetic process	21100	12707	c("GO:0006790", "GO:0044249")
query_1	FALSE	1	1796	32	7	0.21875	0.00389755	GO:0044281	GO:BP	small molecule metabolic process	21100	12712	GO:0008152
query_1	FALSE	1	388	32	1	0.03125	0.00257732	GO:0044282	GO:BP	small molecule catabolic process	21100	12713	c("GO:0009056", "GO:0044281")
query_1	FALSE	1	553	32	3	0.09375	0.00542495	GO:0044283	GO:BP	small molecule biosynthetic process	21100	12714	c("GO:0009058", "GO:0044281")
query_1	FALSE	1	1659	32	1	0.03125	0.000602773	GO:0044419	GO:BP	biological process involved in interspecies interaction between organisms	21100	12783	GO:0008150
query_1	FALSE	1	203	32	2	0.0625	0.00985222	GO:0044703	GO:BP	multi-organism reproductive process	21100	12946	GO:0022414
query_1	FALSE	1	213	32	2	0.0625	0.00938967	GO:0044706	GO:BP	multi-multicellular organism process	21100	12947	GO:0032501
query_1	FALSE	1	96	32	1	0.03125	0.0104167	GO:0044728	GO:BP	DNA methylation or demethylation	21100	12956	GO:0006304
query_1	FALSE	1	538	32	1	0.03125	0.00185874	GO:0044770	GO:BP	cell cycle phase transition	21100	12978	GO:0022402
query_1	FALSE	1	440	32	1	0.03125	0.00227273	GO:0044772	GO:BP	mitotic cell cycle phase transition	21100	12980	c("GO:0044770", "GO:1903047")
query_1	FALSE	1	235	32	1	0.03125	0.00425532	GO:0044843	GO:BP	cell cycle G1/S phase transition	21100	13028	GO:0044770
query_1	FALSE	1	36	32	1	0.03125	0.0277778	GO:0045066	GO:BP	regulatory T cell differentiation	21100	13111	GO:0030217
query_1	FALSE	1	231	32	1	0.03125	0.004329	GO:0045137	GO:BP	development of primary sexual characteristics	21100	13141	c("GO:0003006", "GO:0007275", "GO:0007548")
query_1	FALSE	1	1889	32	4	0.125	0.00211752	GO:0045184	GO:BP	establishment of protein localization	21100	13161	c("GO:0008104", "GO:0051234")
query_1	FALSE	1	4765	32	13	0.40625	0.00272823	GO:0044271	GO:BP	cellular nitrogen compound biosynthetic process	21100	12706	c("GO:0034641", "GO:0044249")
query_1	FALSE	1	286	32	1	0.03125	0.0034965	GO:0046879	GO:BP	hormone secretion	21100	14418	c("GO:0009914", "GO:0023061")
query_1	FALSE	1	236	32	1	0.03125	0.00423729	GO:0046883	GO:BP	regulation of hormone secretion	21100	14422	c("GO:0010646", "GO:0010817", "GO:0023051", "GO:0046879", "GO:1903530")
query_1	FALSE	1	923	32	3	0.09375	0.00325027	GO:0046903	GO:BP	secretion	21100	14441	GO:0006810
query_1	FALSE	1	4184	32	8	0.25	0.00191205	GO:0048869	GO:BP	cellular developmental process	21100	15158	c("GO:0009987", "GO:0032502")
query_1	FALSE	1	535	32	1	0.03125	0.00186916	GO:0048871	GO:BP	multicellular organismal homeostasis	21100	15160	c("GO:0032501", "GO:0042592")
query_1	FALSE	1	1023	32	2	0.0625	0.00195503	GO:0048878	GO:BP	chemical homeostasis	21100	15167	GO:0042592
query_1	FALSE	1	400	32	1	0.03125	0.0025	GO:0048880	GO:BP	sensory system development	21100	15168	GO:0048731
query_1	FALSE	1	17	32	1	0.03125	0.0588235	GO:0050665	GO:BP	hydrogen peroxide biosynthetic process	21100	15251	c("GO:0042743", "GO:0044249", "GO:1903409")
query_1	FALSE	1	141	32	3	0.09375	0.0212766	GO:0050684	GO:BP	regulation of mRNA processing	21100	15267	c("GO:0006397", "GO:1903311")
query_1	FALSE	1	31	32	1	0.03125	0.0322581	GO:0050685	GO:BP	positive regulation of mRNA processing	21100	15268	c("GO:0006397", "GO:0050684", "GO:1903313")
query_1	FALSE	1	30	32	1	0.03125	0.0333333	GO:0050686	GO:BP	negative regulation of mRNA processing	21100	15269	c("GO:0006397", "GO:0050684", "GO:1903312")
query_1	FALSE	1	243	32	1	0.03125	0.00411523	GO:0050708	GO:BP	regulation of protein secretion	21100	15275	c("GO:0009306", "GO:0051223", "GO:1903530")
query_1	FALSE	1	357	32	2	0.0625	0.00560224	GO:0050767	GO:BP	regulation of neurogenesis	21100	15304	c("GO:0022008", "GO:0051960", "GO:0060284")
query_1	FALSE	1	221	32	1	0.03125	0.00452489	GO:0050769	GO:BP	positive regulation of neurogenesis	21100	15306	c("GO:0010720", "GO:0022008", "GO:0050767", "GO:0051962")
query_1	FALSE	1	12276	32	20	0.625	0.0016292	GO:0050789	GO:BP	regulation of biological process	21100	15321	c("GO:0008150", "GO:0065007")
query_1	FALSE	1	2345	32	1	0.03125	0.000426439	GO:0050790	GO:BP	regulation of catalytic activity	21100	15322	GO:0065009
query_1	FALSE	1	2425	32	5	0.15625	0.00206186	GO:0050793	GO:BP	regulation of developmental process	21100	15324	c("GO:0032502", "GO:0050789")
query_1	FALSE	1	5754	32	9	0.28125	0.00156413	GO:0048856	GO:BP	anatomical structure development	21100	15146	GO:0032502
query_1	FALSE	1	11193	32	19	0.59375	0.00169749	GO:0050794	GO:BP	regulation of cellular process	21100	15325	c("GO:0009987", "GO:0050789")
query_1	FALSE	1	610	32	1	0.03125	0.00163934	GO:0050801	GO:BP	ion homeostasis	21100	15330	GO:0048878
query_1	FALSE	1	212	32	1	0.03125	0.00471698	GO:0050803	GO:BP	regulation of synapse structure or activity	21100	15332	GO:0065008
query_1	FALSE	1	441	32	1	0.03125	0.00226757	GO:0050804	GO:BP	modulation of chemical synaptic transmission	21100	15333	c("GO:0007268", "GO:0099177")
query_1	FALSE	1	206	32	1	0.03125	0.00485437	GO:0050807	GO:BP	regulation of synapse organization	21100	15336	c("GO:0050803", "GO:0050808", "GO:0051128")
query_1	FALSE	1	424	32	1	0.03125	0.00235849	GO:0050808	GO:BP	synapse organization	21100	15337	GO:0034330
query_1	FALSE	1	191	32	1	0.03125	0.0052356	GO:0050821	GO:BP	protein stabilization	21100	15346	GO:0031647
query_1	FALSE	1	2654	32	5	0.15625	0.00188395	GO:0071702	GO:BP	organic substance transport	21100	19681	GO:0006810
query_1	FALSE	1	671	32	1	0.03125	0.00149031	GO:0050865	GO:BP	regulation of cell activation	21100	15384	c("GO:0001775", "GO:0050794")
query_1	FALSE	1	16	32	1	0.03125	0.0625	GO:0050872	GO:BP	white fat cell differentiation	21100	15391	GO:0045444
query_1	FALSE	1	1487	32	1	0.03125	0.000672495	GO:0050877	GO:BP	nervous system process	21100	15393	GO:0003008
query_1	FALSE	1	305	32	1	0.03125	0.00327869	GO:0050890	GO:BP	cognition	21100	15405	GO:0050877
query_1	FALSE	1	8885	32	9	0.28125	0.00101294	GO:0050896	GO:BP	response to stimulus	21100	15410	GO:0008150
query_1	FALSE	1	603	32	1	0.03125	0.00165837	GO:0051046	GO:BP	regulation of secretion	21100	15537	c("GO:0046903", "GO:0051049")
query_1	FALSE	1	1724	32	1	0.03125	0.000580046	GO:0051049	GO:BP	regulation of transport	21100	15540	c("GO:0006810", "GO:0032879")
query_1	FALSE	1	148	32	1	0.03125	0.00675676	GO:0050796	GO:BP	regulation of insulin secretion	21100	15327	c("GO:0030073", "GO:0050708", "GO:0090276")
query_1	FALSE	1	215	32	1	0.03125	0.00465116	GO:0048738	GO:BP	cardiac muscle tissue development	21100	15038	c("GO:0007507", "GO:0014706")
query_1	FALSE	1	178	32	1	0.03125	0.00561798	GO:0048736	GO:BP	appendage development	21100	15036	c("GO:0007275", "GO:0048856")
query_1	FALSE	1	435	32	1	0.03125	0.00229885	GO:0048732	GO:BP	gland development	21100	15032	GO:0048513
query_1	FALSE	1	1766	32	4	0.125	0.00226501	GO:0046907	GO:BP	intracellular transport	21100	14442	c("GO:0006810", "GO:0051641", "GO:0051649")
query_1	FALSE	1	111	32	1	0.03125	0.00900901	GO:0046916	GO:BP	cellular transition metal ion homeostasis	21100	14445	c("GO:0006875", "GO:0055076")
query_1	FALSE	1	281	32	2	0.0625	0.00711744	GO:0046942	GO:BP	carboxylic acid transport	21100	14458	GO:0015711
query_1	FALSE	1	21	32	1	0.03125	0.047619	GO:0048025	GO:BP	negative regulation of mRNA splicing, via spliceosome	21100	14501	c("GO:0000398", "GO:0033119", "GO:0048024", "GO:0050686")
query_1	FALSE	1	22	32	1	0.03125	0.0454545	GO:0048026	GO:BP	positive regulation of mRNA splicing, via spliceosome	21100	14502	c("GO:0000398", "GO:0033120", "GO:0048024", "GO:0050685")
query_1	FALSE	1	205	32	1	0.03125	0.00487805	GO:0048167	GO:BP	regulation of synaptic plasticity	21100	14592	c("GO:0050804", "GO:0065008")
query_1	FALSE	1	59	32	1	0.03125	0.0169492	GO:0048278	GO:BP	vesicle docking	21100	14655	c("GO:0016192", "GO:0140056")
query_1	FALSE	1	15	32	1	0.03125	0.0666667	GO:0048311	GO:BP	mitochondrion distribution	21100	14684	c("GO:0007005", "GO:0051646")
query_1	FALSE	1	7	32	1	0.03125	0.142857	GO:0048312	GO:BP	intracellular distribution of mitochondria	21100	14685	GO:0048311
query_1	FALSE	1	2094	32	3	0.09375	0.00143266	GO:0048468	GO:BP	cell development	21100	14805	c("GO:0030154", "GO:0048856", "GO:0048869")
query_1	FALSE	1	302	32	2	0.0625	0.00662252	GO:0048511	GO:BP	rhythmic process	21100	14833	GO:0008150
query_1	FALSE	1	3513	32	6	0.1875	0.00170794	GO:0048513	GO:BP	animal organ development	21100	14835	GO:0048856
query_1	FALSE	1	613	32	1	0.03125	0.00163132	GO:0048514	GO:BP	blood vessel morphogenesis	21100	14836	c("GO:0001568", "GO:0035239")
query_1	FALSE	1	6224	32	13	0.40625	0.00208869	GO:0048518	GO:BP	positive regulation of biological process	21100	14840	c("GO:0008150", "GO:0050789")
query_1	FALSE	1	5876	32	15	0.46875	0.00255276	GO:0048519	GO:BP	negative regulation of biological process	21100	14841	c("GO:0008150", "GO:0050789")
query_1	FALSE	1	5687	32	12	0.375	0.00211008	GO:0048522	GO:BP	positive regulation of cellular process	21100	14844	c("GO:0009987", "GO:0048518", "GO:0050794")
query_1	FALSE	1	4856	32	14	0.4375	0.00288303	GO:0048523	GO:BP	negative regulation of cellular process	21100	14845	c("GO:0009987", "GO:0048519", "GO:0050794")
query_1	FALSE	1	4313	32	9	0.28125	0.00208671	GO:0048731	GO:BP	system development	21100	15031	c("GO:0007275", "GO:0048856")
query_1	FALSE	1	640	32	1	0.03125	0.0015625	GO:0048729	GO:BP	tissue morphogenesis	21100	15029	c("GO:0009653", "GO:0009888")
query_1	FALSE	1	1436	32	1	0.03125	0.000696379	GO:0048699	GO:BP	generation of neurons	21100	14999	GO:0022008
query_1	FALSE	1	1108	32	1	0.03125	0.000902527	GO:0048666	GO:BP	neuron development	21100	14967	c("GO:0030182", "GO:0048468")
query_1	FALSE	1	1134	32	2	0.0625	0.00176367	GO:0048646	GO:BP	anatomical structure formation involved in morphogenesis	21100	14947	c("GO:0009653", "GO:0032502")
query_1	FALSE	1	876	32	1	0.03125	0.00114155	GO:0048609	GO:BP	multicellular organismal reproductive process	21100	14911	c("GO:0022414", "GO:0032504")
query_1	FALSE	1	366	32	1	0.03125	0.00273224	GO:0051098	GO:BP	regulation of binding	21100	15575	GO:0065009
query_1	FALSE	1	436	32	1	0.03125	0.00229358	GO:0048608	GO:BP	reproductive structure development	21100	14910	c("GO:0003006", "GO:0048856", "GO:0061458")
query_1	FALSE	1	639	32	2	0.0625	0.00312989	GO:0048589	GO:BP	developmental growth	21100	14901	c("GO:0032502", "GO:0040007")
query_1	FALSE	1	1599	32	1	0.03125	0.000625391	GO:0048585	GO:BP	negative regulation of response to stimulus	21100	14897	c("GO:0048519", "GO:0048583", "GO:0050896")
query_1	FALSE	1	2169	32	1	0.03125	0.000461042	GO:0048584	GO:BP	positive regulation of response to stimulus	21100	14896	c("GO:0048518", "GO:0048583", "GO:0050896")
query_1	FALSE	1	3895	32	3	0.09375	0.000770218	GO:0048583	GO:BP	regulation of response to stimulus	21100	14895	c("GO:0050789", "GO:0050896")
query_1	FALSE	1	131	32	1	0.03125	0.00763359	GO:0048565	GO:BP	digestive tract development	21100	14877	c("GO:0035295", "GO:0055123")
query_1	FALSE	1	938	32	3	0.09375	0.00319829	GO:0048534	GO:BP	hematopoietic or lymphoid organ development	21100	14854	c("GO:0002520", "GO:0048513")
query_1	FALSE	1	609	32	1	0.03125	0.00164204	GO:0048598	GO:BP	embryonic morphogenesis	21100	14906	c("GO:0009653", "GO:0009790")
query_1	FALSE	1	13889	32	24	0.75	0.00172799	GO:0071704	GO:BP	organic substance metabolic process	21100	19683	GO:0008152
query_1	FALSE	1	1099	32	2	0.0625	0.00181984	GO:0072359	GO:BP	circulatory system development	21100	20215	GO:0048731
query_1	FALSE	1	8070	32	12	0.375	0.00148699	GO:0071840	GO:BP	cellular component organization or biogenesis	21100	19757	GO:0009987
query_1	FALSE	1	99	32	1	0.03125	0.010101	GO:1990830	GO:BP	cellular response to leukemia inhibitory factor	21100	29142	c("GO:0071345", "GO:1990823")
query_1	FALSE	1	160	32	1	0.03125	0.00625	GO:1990845	GO:BP	adaptive thermogenesis	21100	29150	GO:0008152
query_1	FALSE	1	9	32	1	0.03125	0.111111	GO:2000018	GO:BP	regulation of male gonad development	21100	29244	c("GO:0008584", "GO:1905939")
query_1	FALSE	1	8	32	1	0.03125	0.125	GO:2000020	GO:BP	positive regulation of male gonad development	21100	29246	c("GO:0008584", "GO:1905941", "GO:2000018")
query_1	FALSE	1	1345	32	4	0.125	0.00297398	GO:2000026	GO:BP	regulation of multicellular organismal development	21100	29251	c("GO:0007275", "GO:0050793", "GO:0051239")
query_1	FALSE	1	34	32	1	0.03125	0.0294118	GO:2000036	GO:BP	regulation of stem cell population maintenance	21100	29261	c("GO:0019827", "GO:0050793", "GO:0051239")
query_1	FALSE	1	140	32	1	0.03125	0.00714286	GO:2000045	GO:BP	regulation of G1/S transition of mitotic cell cycle	21100	29270	c("GO:0000082", "GO:1901990", "GO:1902806")
query_1	FALSE	1	483	32	1	0.03125	0.00207039	GO:2000112	GO:BP	regulation of cellular macromolecule biosynthetic process	21100	29336	c("GO:0010556", "GO:0031326", "GO:0034645")
query_1	FALSE	1	16	32	1	0.03125	0.0625	GO:2000232	GO:BP	regulation of rRNA processing	21100	29454	c("GO:0006364", "GO:0010468", "GO:0051252")
query_1	FALSE	1	10	32	1	0.03125	0.1	GO:2000234	GO:BP	positive regulation of rRNA processing	21100	29456	c("GO:0006364", "GO:0051254", "GO:2000232")
query_1	FALSE	1	176	32	1	0.03125	0.00568182	GO:2000241	GO:BP	regulation of reproductive process	21100	29463	c("GO:0022414", "GO:0050789")
query_1	FALSE	1	85	32	1	0.03125	0.0117647	GO:2000243	GO:BP	positive regulation of reproductive process	21100	29465	c("GO:0022414", "GO:0048518", "GO:2000241")
query_1	FALSE	1	52	32	1	0.03125	0.0192308	GO:2000677	GO:BP	regulation of transcription regulatory region DNA binding	21100	29881	GO:0051101
query_1	FALSE	1	20	32	1	0.03125	0.05	GO:2000678	GO:BP	negative regulation of transcription regulatory region DNA binding	21100	29882	c("GO:0043392", "GO:2000677")
query_1	FALSE	1	15	32	1	0.03125	0.0666667	GO:2000725	GO:BP	regulation of cardiac muscle cell differentiation	21100	29928	c("GO:0051153", "GO:0055007", "GO:1905207")
query_1	FALSE	1	8	32	1	0.03125	0.125	GO:2000727	GO:BP	positive regulation of cardiac muscle cell differentiation	21100	29930	c("GO:0051155", "GO:0055007", "GO:1905209", "GO:2000725")
query_1	FALSE	1	71	32	1	0.03125	0.0140845	GO:2000756	GO:BP	regulation of peptidyl-lysine acetylation	21100	29959	c("GO:0018394", "GO:1901983")
query_1	FALSE	1	3461	32	12	0.375	0.00346721	GO:2001141	GO:BP	regulation of RNA biosynthetic process	21100	30316	c("GO:0010556", "GO:0031326", "GO:0032774", "GO:0051252")
query_1	FALSE	1	37	32	1	0.03125	0.027027	GO:2000758	GO:BP	positive regulation of peptidyl-lysine acetylation	21100	29961	c("GO:0018394", "GO:1901985", "GO:2000756")
query_1	FALSE	1	100	32	1	0.03125	0.01	GO:1990823	GO:BP	response to leukemia inhibitory factor	21100	29140	GO:0034097
query_1	FALSE	1	2233	32	5	0.15625	0.00223914	GO:0071705	GO:BP	nitrogen compound transport	21100	19684	GO:0006810
query_1	FALSE	1	336	32	1	0.03125	0.00297619	GO:1990778	GO:BP	protein localization to cell periphery	21100	29114	GO:0034613
query_1	FALSE	1	6	32	1	0.03125	0.166667	GO:1990164	GO:BP	histone H2A phosphorylation	21100	28870	GO:0016572
query_1	FALSE	1	15	32	1	0.03125	0.0666667	GO:0098712	GO:BP	L-glutamate import across plasma membrane	21100	22041	c("GO:0015813", "GO:0089718")
query_1	FALSE	1	141	32	2	0.0625	0.0141844	GO:0098727	GO:BP	maintenance of cell number	21100	22055	GO:0032502
query_1	FALSE	1	137	32	2	0.0625	0.0145985	GO:0098732	GO:BP	macromolecule deacylation	21100	22060	GO:0043412
query_1	FALSE	1	174	32	2	0.0625	0.0114943	GO:0098739	GO:BP	import across plasma membrane	21100	22065	GO:0055085
query_1	FALSE	1	277	32	1	0.03125	0.00361011	GO:0098742	GO:BP	cell-cell adhesion via plasma-membrane adhesion molecules	21100	22067	GO:0098609
query_1	FALSE	1	596	32	1	0.03125	0.00167785	GO:0098771	GO:BP	inorganic ion homeostasis	21100	22088	GO:0050801
query_1	FALSE	1	34	32	1	0.03125	0.0294118	GO:0098810	GO:BP	neurotransmitter reuptake	21100	22107	c("GO:0001504", "GO:0051649")
query_1	FALSE	1	7	32	1	0.03125	0.142857	GO:0098838	GO:BP	folate transmembrane transport	21100	22122	c("GO:0015884", "GO:0035461", "GO:0098656", "GO:1905039")
query_1	FALSE	1	709	32	1	0.03125	0.00141044	GO:0098916	GO:BP	anterograde trans-synaptic signaling	21100	22162	GO:0099537
query_1	FALSE	1	442	32	1	0.03125	0.00226244	GO:0099177	GO:BP	regulation of trans-synaptic signaling	21100	22301	c("GO:0010646", "GO:0023051", "GO:0099537")
query_1	FALSE	1	740	32	1	0.03125	0.00135135	GO:0099536	GO:BP	synaptic signaling	21100	22331	GO:0007267
query_1	FALSE	1	717	32	1	0.03125	0.0013947	GO:0099537	GO:BP	trans-synaptic signaling	21100	22332	GO:0099536
query_1	FALSE	1	2	32	1	0.03125	0.5	GO:0106004	GO:BP	tRNA (guanine-N7)-methylation	21100	22487	c("GO:0030488", "GO:0036265")
query_1	FALSE	1	4	32	1	0.03125	0.25	GO:0106077	GO:BP	histone succinylation	21100	22530	GO:0018335
query_1	FALSE	1	147	32	1	0.03125	0.00680272	GO:0106106	GO:BP	cold-induced thermogenesis	21100	22542	c("GO:0001659", "GO:1990845")
query_1	FALSE	1	1	32	1	0.03125	1	GO:0106227	GO:BP	peptidyl-lysine glutarylation	21100	22587	GO:0043543
query_1	FALSE	1	619	32	1	0.03125	0.00161551	GO:0120035	GO:BP	regulation of plasma membrane bounded cell projection organization	21100	22776	c("GO:0031344", "GO:0120036")
query_1	FALSE	1	34	32	1	0.03125	0.0294118	GO:1900077	GO:BP	negative regulation of cellular response to insulin stimulus	21100	23425	c("GO:0032869", "GO:0048523", "GO:0048585", "GO:1900076")
query_1	FALSE	1	61	32	1	0.03125	0.0163934	GO:1900076	GO:BP	regulation of cellular response to insulin stimulus	21100	23424	c("GO:0032869", "GO:0048583", "GO:0050794")
query_1	FALSE	1	87	32	1	0.03125	0.0114943	GO:0150104	GO:BP	transport across blood-brain barrier	21100	23282	GO:0010232
query_1	FALSE	1	394	32	1	0.03125	0.00253807	GO:0150063	GO:BP	visual system development	21100	23254	GO:0048880
query_1	FALSE	1	379	32	2	0.0625	0.00527704	GO:0140694	GO:BP	non-membrane-bounded organelle assembly	21100	23191	GO:0070925
query_1	FALSE	1	4	32	1	0.03125	0.25	GO:0140361	GO:BP	cyclic-GMP-AMP transmembrane import across plasma membrane	21100	23074	c("GO:0015711", "GO:0015868", "GO:0051503", "GO:0070729", "GO:0098656", "GO:0098657", "GO:0098739", "GO:1903790")
query_1	FALSE	1	225	32	2	0.0625	0.00888889	GO:0098657	GO:BP	import into cell	21100	22010	GO:0006810
query_1	FALSE	1	845	32	3	0.09375	0.0035503	GO:0140352	GO:BP	export from cell	21100	23070	c("GO:0006810", "GO:0009987")
query_1	FALSE	1	74	32	1	0.03125	0.0135135	GO:0140029	GO:BP	exocytic process	21100	22957	c("GO:0006887", "GO:0009987")
query_1	FALSE	1	156	32	1	0.03125	0.00641026	GO:0120254	GO:BP	olefinic compound metabolic process	21100	22899	GO:0071704
query_1	FALSE	1	7	32	1	0.03125	0.142857	GO:0120252	GO:BP	hydrocarbon metabolic process	21100	22897	GO:0071704
query_1	FALSE	1	98	32	1	0.03125	0.0102041	GO:0120162	GO:BP	positive regulation of cold-induced thermogenesis	21100	22842	c("GO:0009893", "GO:0051240", "GO:0106106", "GO:0120161")
query_1	FALSE	1	147	32	1	0.03125	0.00680272	GO:0120161	GO:BP	regulation of cold-induced thermogenesis	21100	22841	c("GO:0019222", "GO:0051239", "GO:0065008", "GO:0106106")
query_1	FALSE	1	1485	32	1	0.03125	0.000673401	GO:0120036	GO:BP	plasma membrane bounded cell projection organization	21100	22777	GO:0030030
query_1	FALSE	1	77	32	1	0.03125	0.012987	GO:0140056	GO:BP	organelle localization by membrane tethering	21100	22969	c("GO:0022406", "GO:0051640")
query_1	FALSE	1	43	32	1	0.03125	0.0232558	GO:1900087	GO:BP	positive regulation of G1/S transition of mitotic cell cycle	21100	23435	c("GO:0000082", "GO:1901992", "GO:1902808", "GO:2000045")
query_1	FALSE	1	250	32	2	0.0625	0.008	GO:0098656	GO:BP	anion transmembrane transport	21100	22009	c("GO:0006820", "GO:0034220")
query_1	FALSE	1	46	32	1	0.03125	0.0217391	GO:0098534	GO:BP	centriole assembly	21100	21988	c("GO:0031023", "GO:0140694")
query_1	FALSE	1	2	32	1	0.03125	0.5	GO:0071929	GO:BP	alpha-tubulin acetylation	21100	19821	GO:0018393
query_1	FALSE	1	141	32	1	0.03125	0.0070922	GO:0072175	GO:BP	epithelial tube formation	21100	20043	c("GO:0035148", "GO:0060562")
query_1	FALSE	1	206	32	2	0.0625	0.00970874	GO:0072330	GO:BP	monocarboxylic acid biosynthetic process	21100	20193	c("GO:0032787", "GO:0046394")
query_1	FALSE	1	175	32	1	0.03125	0.00571429	GO:0072331	GO:BP	signal transduction by p53 class mediator	21100	20194	GO:0035556
query_1	FALSE	1	32	32	1	0.03125	0.03125	GO:0072337	GO:BP	modified amino acid transport	21100	20200	c("GO:0071702", "GO:0071705")
query_1	FALSE	1	556	32	1	0.03125	0.00179856	GO:0044057	GO:BP	regulation of system process	21100	12600	c("GO:0003008", "GO:0051239")
query_1	FALSE	1	25	32	1	0.03125	0.04	GO:0072530	GO:BP	purine-containing compound transmembrane transport	21100	20322	c("GO:0055085", "GO:0071702", "GO:0071705")
query_1	FALSE	1	221	32	1	0.03125	0.00452489	GO:0072593	GO:BP	reactive oxygen species metabolic process	21100	20348	GO:0044237
query_1	FALSE	1	657	32	2	0.0625	0.00304414	GO:0072594	GO:BP	establishment of protein localization to organelle	21100	20349	c("GO:0033365", "GO:0045184")
query_1	FALSE	1	68	32	1	0.03125	0.0147059	GO:0072665	GO:BP	protein localization to vacuole	21100	20376	GO:0033365
query_1	FALSE	1	49	32	1	0.03125	0.0204082	GO:0072666	GO:BP	establishment of protein localization to vacuole	21100	20377	c("GO:0072594", "GO:0072665")
query_1	FALSE	1	11	32	1	0.03125	0.0909091	GO:0072697	GO:BP	protein localization to cell cortex	21100	20403	GO:1990778
query_1	FALSE	1	5812	32	14	0.4375	0.00240881	GO:0080090	GO:BP	regulation of primary metabolic process	21100	20855	c("GO:0019222", "GO:0044238")
query_1	FALSE	1	45	32	1	0.03125	0.0222222	GO:0089718	GO:BP	amino acid import across plasma membrane	21100	21031	c("GO:0003333", "GO:0098657", "GO:0098739")
query_1	FALSE	1	22	32	1	0.03125	0.0454545	GO:0090042	GO:BP	tubulin deacetylation	21100	21067	GO:0006476
query_1	FALSE	1	19	32	1	0.03125	0.0526316	GO:0090043	GO:BP	regulation of tubulin deacetylation	21100	21068	c("GO:0090042", "GO:0090311")
query_1	FALSE	1	491	32	1	0.03125	0.00203666	GO:0090066	GO:BP	regulation of anatomical structure size	21100	21090	GO:0065008
query_1	FALSE	1	139	32	1	0.03125	0.00719424	GO:0097746	GO:BP	blood vessel diameter maintenance	21100	21947	c("GO:0003018", "GO:0008015", "GO:0035296")
query_1	FALSE	1	3580	32	12	0.375	0.00335196	GO:0097659	GO:BP	nucleic acid-templated transcription	21100	21907	c("GO:0010467", "GO:0032774")
query_1	FALSE	1	92	32	1	0.03125	0.0108696	GO:0097306	GO:BP	cellular response to alcohol	21100	21764	c("GO:0071310", "GO:0097305", "GO:1901701")
query_1	FALSE	1	237	32	1	0.03125	0.00421941	GO:0097305	GO:BP	response to alcohol	21100	21763	c("GO:0010033", "GO:1901700")
query_1	FALSE	1	11	32	1	0.03125	0.0909091	GO:0097267	GO:BP	omega-hydroxylase P450 pathway	21100	21729	GO:0019369
query_1	FALSE	1	4	32	1	0.03125	0.25	GO:0097167	GO:BP	circadian regulation of translation	21100	21679	c("GO:0006417", "GO:0007623", "GO:0032501")
query_1	FALSE	1	913	32	1	0.03125	0.00109529	GO:0098609	GO:BP	cell-cell adhesion	21100	22001	GO:0007155
query_1	FALSE	1	23	32	1	0.03125	0.0434783	GO:0097150	GO:BP	neuronal stem cell population maintenance	21100	21671	GO:0019827
query_1	FALSE	1	156	32	1	0.03125	0.00641026	GO:0090501	GO:BP	RNA phosphodiester bond hydrolysis	21100	21464	c("GO:0016070", "GO:0090305")
query_1	FALSE	1	62	32	1	0.03125	0.016129	GO:0090311	GO:BP	regulation of protein deacetylation	21100	21322	c("GO:0006476", "GO:0031399")
query_1	FALSE	1	246	32	1	0.03125	0.00406504	GO:0090305	GO:BP	nucleic acid phosphodiester bond hydrolysis	21100	21316	GO:0090304
query_1	FALSE	1	180	32	1	0.03125	0.00555556	GO:0090276	GO:BP	regulation of peptide hormone secretion	21100	21288	c("GO:0002791", "GO:0030072", "GO:0046883")
query_1	FALSE	1	186	32	1	0.03125	0.00537634	GO:0090087	GO:BP	regulation of peptide transport	21100	21110	c("GO:0015833", "GO:0051049")
query_1	FALSE	1	248	32	1	0.03125	0.00403226	GO:0090068	GO:BP	positive regulation of cell cycle process	21100	21092	c("GO:0010564", "GO:0022402", "GO:0045787")
query_1	FALSE	1	87	32	1	0.03125	0.0114943	GO:0090502	GO:BP	RNA phosphodiester bond hydrolysis, endonucleolytic	21100	21465	GO:0090501
query_1	FALSE	1	1	32	1	0.03125	1	GO:1990245	GO:BP	histone H2A-T120 phosphorylation	21100	28904	c("GO:0035405", "GO:1990164")
query_1	FALSE	1	2	32	1	0.03125	0.5	GO:1900673	GO:BP	olefin metabolic process	21100	24004	c("GO:0120252", "GO:0120254")
query_1	FALSE	1	530	32	1	0.03125	0.00188679	GO:1901361	GO:BP	organic cyclic compound catabolic process	21100	24666	c("GO:1901360", "GO:1901575")
query_1	FALSE	1	755	32	1	0.03125	0.0013245	GO:1903047	GO:BP	mitotic cell cycle process	21100	26160	c("GO:0000278", "GO:0022402")
query_1	FALSE	1	440	32	2	0.0625	0.00454545	GO:1903131	GO:BP	mononuclear cell differentiation	21100	26236	GO:0002521
query_1	FALSE	1	326	32	3	0.09375	0.00920245	GO:1903311	GO:BP	regulation of mRNA metabolic process	21100	26378	c("GO:0016071", "GO:0051252")
query_1	FALSE	1	98	32	1	0.03125	0.0102041	GO:1903312	GO:BP	negative regulation of mRNA metabolic process	21100	26379	c("GO:0016071", "GO:0051253", "GO:1903311")
query_1	FALSE	1	123	32	1	0.03125	0.00813008	GO:1903313	GO:BP	positive regulation of mRNA metabolic process	21100	26380	c("GO:0016071", "GO:0051254", "GO:1903311")
query_1	FALSE	1	246	32	2	0.0625	0.00813008	GO:1903320	GO:BP	regulation of protein modification by small protein conjugation or removal	21100	26387	c("GO:0031399", "GO:0070647")
query_1	FALSE	1	96	32	2	0.0625	0.0208333	GO:1903321	GO:BP	negative regulation of protein modification by small protein conjugation or removal	21100	26388	c("GO:0031400", "GO:0070647", "GO:1903320")
query_1	FALSE	1	8	32	1	0.03125	0.125	GO:1903332	GO:BP	regulation of protein folding	21100	26399	c("GO:0006457", "GO:0050794")
query_1	FALSE	1	4	32	1	0.03125	0.25	GO:1903333	GO:BP	negative regulation of protein folding	21100	26400	c("GO:0006457", "GO:0048523", "GO:1903332")
query_1	FALSE	1	55	32	1	0.03125	0.0181818	GO:1903409	GO:BP	reactive oxygen species biosynthetic process	21100	26474	c("GO:0009058", "GO:0072593")
query_1	FALSE	1	3452	32	12	0.375	0.00347625	GO:1903506	GO:BP	regulation of nucleic acid-templated transcription	21100	26560	c("GO:0097659", "GO:2001141")
query_1	FALSE	1	1295	32	7	0.21875	0.00540541	GO:1903507	GO:BP	negative regulation of nucleic acid-templated transcription	21100	26561	c("GO:0097659", "GO:1902679", "GO:1903506")
query_1	FALSE	1	1636	32	6	0.1875	0.00366748	GO:1903508	GO:BP	positive regulation of nucleic acid-templated transcription	21100	26562	c("GO:0097659", "GO:1902680", "GO:1903506")
query_1	FALSE	1	251	32	1	0.03125	0.00398406	GO:1903522	GO:BP	regulation of blood circulation	21100	26576	c("GO:0008015", "GO:0044057")
query_1	FALSE	1	547	32	1	0.03125	0.00182815	GO:1903530	GO:BP	regulation of secretion by cell	21100	26584	c("GO:0032940", "GO:0050794", "GO:0051046")
query_1	FALSE	1	374	32	1	0.03125	0.0026738	GO:1903706	GO:BP	regulation of hemopoiesis	21100	26755	c("GO:0002682", "GO:0030097", "GO:2000026")
query_1	FALSE	1	15	32	1	0.03125	0.0666667	GO:1903789	GO:BP	regulation of amino acid transmembrane transport	21100	26819	c("GO:0003333", "GO:0034762", "GO:0051955")
query_1	FALSE	1	44	32	1	0.03125	0.0227273	GO:1990090	GO:BP	cellular response to nerve growth factor stimulus	21100	28840	c("GO:0071363", "GO:0071495", "GO:1990089")
query_1	FALSE	1	46	32	1	0.03125	0.0217391	GO:1990089	GO:BP	response to nerve growth factor	21100	28839	c("GO:0009719", "GO:0070848")
query_1	FALSE	1	1	32	1	0.03125	1	GO:1905957	GO:BP	regulation of cellular response to alcohol	21100	28805	c("GO:0050794", "GO:0097306", "GO:1901419")
query_1	FALSE	1	9	32	1	0.03125	0.111111	GO:1905941	GO:BP	positive regulation of gonad development	21100	28791	c("GO:0008406", "GO:0051094", "GO:0051240", "GO:1905939", "GO:2000243")
query_1	FALSE	1	13	32	1	0.03125	0.0769231	GO:1905939	GO:BP	regulation of gonad development	21100	28789	c("GO:0008406", "GO:0050793", "GO:2000241")
query_1	FALSE	1	16	32	1	0.03125	0.0625	GO:1905209	GO:BP	positive regulation of cardiocyte differentiation	21100	28112	c("GO:0035051", "GO:0045597", "GO:0051240", "GO:1905207")
query_1	FALSE	1	9	32	1	0.03125	0.111111	GO:1903010	GO:BP	regulation of bone development	21100	26125	c("GO:0060348", "GO:2000026")
query_1	FALSE	1	27	32	1	0.03125	0.037037	GO:1905207	GO:BP	regulation of cardiocyte differentiation	21100	28110	c("GO:0035051", "GO:0045595")
query_1	FALSE	1	3	32	1	0.03125	0.333333	GO:1904715	GO:BP	negative regulation of chaperone-mediated autophagy	21100	27659	c("GO:0010507", "GO:0042177", "GO:0061684", "GO:1904714")
query_1	FALSE	1	8	32	1	0.03125	0.125	GO:1904714	GO:BP	regulation of chaperone-mediated autophagy	21100	27658	c("GO:0010506", "GO:0042176", "GO:0061684")
query_1	FALSE	1	5	32	1	0.03125	0.2	GO:1904447	GO:BP	folate import across plasma membrane	21100	27419	c("GO:0098657", "GO:0098739", "GO:0098838")
query_1	FALSE	1	27	32	1	0.03125	0.037037	GO:1903959	GO:BP	regulation of anion transmembrane transport	21100	26966	c("GO:0034765", "GO:0044070", "GO:0098656")
query_1	FALSE	1	150	32	2	0.0625	0.0133333	GO:1903825	GO:BP	organic acid transmembrane transport	21100	26849	c("GO:0015849", "GO:0055085")
query_1	FALSE	1	6	32	1	0.03125	0.166667	GO:1903790	GO:BP	guanine nucleotide transmembrane transport	21100	26820	c("GO:0001408", "GO:0072530", "GO:1901679")
query_1	FALSE	1	149	32	2	0.0625	0.0134228	GO:1905039	GO:BP	carboxylic acid transmembrane transport	21100	27961	GO:1903825
query_1	FALSE	1	82	32	1	0.03125	0.0121951	GO:1901264	GO:BP	carbohydrate derivative transport	21100	24574	GO:0071702
query_1	FALSE	1	58	32	1	0.03125	0.0172414	GO:1902808	GO:BP	positive regulation of cell cycle G1/S phase transition	21100	25939	c("GO:0044843", "GO:1901989", "GO:1902806")
query_1	FALSE	1	1642	32	6	0.1875	0.00365408	GO:1902680	GO:BP	positive regulation of RNA biosynthetic process	21100	25830	c("GO:0010557", "GO:0031328", "GO:0032774", "GO:0051254", "GO:2001141")
query_1	FALSE	1	4213	32	13	0.40625	0.00308569	GO:1901362	GO:BP	organic cyclic compound biosynthetic process	21100	24667	c("GO:1901360", "GO:1901576")
query_1	FALSE	1	1	32	1	0.03125	1	GO:1901419	GO:BP	regulation of response to alcohol	21100	24720	c("GO:0048583", "GO:0097305")
query_1	FALSE	1	6446	32	10	0.3125	0.00155135	GO:1901564	GO:BP	organonitrogen compound metabolic process	21100	24853	c("GO:0006807", "GO:0071704")
query_1	FALSE	1	1350	32	1	0.03125	0.000740741	GO:1901565	GO:BP	organonitrogen compound catabolic process	21100	24854	c("GO:1901564", "GO:1901575")
query_1	FALSE	1	1708	32	2	0.0625	0.00117096	GO:1901566	GO:BP	organonitrogen compound biosynthetic process	21100	24855	c("GO:1901564", "GO:1901576")
query_1	FALSE	1	2103	32	2	0.0625	0.000951022	GO:1901575	GO:BP	organic substance catabolic process	21100	24863	c("GO:0009056", "GO:0071704")
query_1	FALSE	1	5774	32	15	0.46875	0.00259785	GO:1901576	GO:BP	organic substance biosynthetic process	21100	24864	c("GO:0009058", "GO:0071704")
query_1	FALSE	1	559	32	2	0.0625	0.00357782	GO:1901615	GO:BP	organic hydroxy compound metabolic process	21100	24894	GO:0071704
query_1	FALSE	1	236	32	1	0.03125	0.00423729	GO:1901617	GO:BP	organic hydroxy compound biosynthetic process	21100	24896	c("GO:1901576", "GO:1901615")
query_1	FALSE	1	477	32	1	0.03125	0.00209644	GO:1901652	GO:BP	response to peptide	21100	24928	c("GO:0010243", "GO:1901700")
query_1	FALSE	1	349	32	1	0.03125	0.00286533	GO:1901653	GO:BP	cellular response to peptide	21100	24929	c("GO:0071417", "GO:1901652", "GO:1901701")
query_1	FALSE	1	20	32	1	0.03125	0.05	GO:1901679	GO:BP	nucleotide transmembrane transport	21100	24953	c("GO:0006862", "GO:0055085")
query_1	FALSE	1	1100	32	1	0.03125	0.000909091	GO:1901698	GO:BP	response to nitrogen compound	21100	24964	GO:0042221
query_1	FALSE	1	683	32	1	0.03125	0.00146413	GO:1901699	GO:BP	cellular response to nitrogen compound	21100	24965	c("GO:0070887", "GO:1901698")
query_1	FALSE	1	1624	32	3	0.09375	0.00184729	GO:1901700	GO:BP	response to oxygen-containing compound	21100	24966	GO:0042221
query_1	FALSE	1	1166	32	2	0.0625	0.00171527	GO:1901701	GO:BP	cellular response to oxygen-containing compound	21100	24967	c("GO:0070887", "GO:1901700")
query_1	FALSE	1	104	32	1	0.03125	0.00961538	GO:1901796	GO:BP	regulation of signal transduction by p53 class mediator	21100	25060	c("GO:0072331", "GO:1902531")
query_1	FALSE	1	1297	32	7	0.21875	0.00539707	GO:1902679	GO:BP	negative regulation of RNA biosynthetic process	21100	25829	c("GO:0010558", "GO:0031327", "GO:0032774", "GO:0051253", "GO:2001141")
query_1	FALSE	1	1691	32	1	0.03125	0.000591366	GO:1902531	GO:BP	regulation of intracellular signal transduction	21100	25711	c("GO:0009966", "GO:0035556")
query_1	FALSE	1	66	32	1	0.03125	0.0151515	GO:1902475	GO:BP	L-alpha-amino acid transmembrane transport	21100	25676	GO:0003333
query_1	FALSE	1	43	32	1	0.03125	0.0232558	GO:1902116	GO:BP	negative regulation of organelle assembly	21100	25366	c("GO:0010639", "GO:0070925", "GO:1902115")
query_1	FALSE	1	203	32	1	0.03125	0.00492611	GO:1902115	GO:BP	regulation of organelle assembly	21100	25365	c("GO:0033043", "GO:0044087", "GO:0070925")
query_1	FALSE	1	288	32	1	0.03125	0.00347222	GO:1902105	GO:BP	regulation of leukocyte differentiation	21100	25355	c("GO:0002521", "GO:0045595", "GO:1903706")
query_1	FALSE	1	168	32	1	0.03125	0.00595238	GO:1902806	GO:BP	regulation of cell cycle G1/S phase transition	21100	25937	c("GO:0044843", "GO:1901987")
query_1	FALSE	1	91	32	1	0.03125	0.010989	GO:1901992	GO:BP	positive regulation of mitotic cell cycle phase transition	21100	25250	c("GO:0044772", "GO:0045931", "GO:1901989", "GO:1901990")
query_1	FALSE	1	116	32	1	0.03125	0.00862069	GO:1901989	GO:BP	positive regulation of cell cycle phase transition	21100	25247	c("GO:0044770", "GO:0090068", "GO:1901987")
query_1	FALSE	1	414	32	1	0.03125	0.00241546	GO:1901987	GO:BP	regulation of cell cycle phase transition	21100	25245	c("GO:0010564", "GO:0044770")
query_1	FALSE	1	47	32	1	0.03125	0.0212766	GO:1901985	GO:BP	positive regulation of protein acetylation	21100	25243	c("GO:0006473", "GO:0031401", "GO:1901983")
query_1	FALSE	1	84	32	1	0.03125	0.0119048	GO:1901983	GO:BP	regulation of protein acetylation	21100	25241	c("GO:0006473", "GO:0031399")
query_1	FALSE	1	105	32	1	0.03125	0.00952381	GO:1901890	GO:BP	positive regulation of cell junction assembly	21100	25154	c("GO:0034329", "GO:0044089", "GO:0051130", "GO:1901888")
query_1	FALSE	1	200	32	1	0.03125	0.005	GO:1901888	GO:BP	regulation of cell junction assembly	21100	25152	c("GO:0034329", "GO:0044087", "GO:0051128")
query_1	FALSE	1	320	32	1	0.03125	0.003125	GO:1901990	GO:BP	regulation of mitotic cell cycle phase transition	21100	25248	c("GO:0007346", "GO:0044772", "GO:1901987")
query_1	FALSE	1	73	32	1	0.03125	0.0136986	GO:0044042	GO:BP	glucan metabolic process	21100	12587	GO:0005976
query_1	FALSE	1	93	32	1	0.03125	0.0107527	GO:0043648	GO:BP	dicarboxylic acid metabolic process	21100	12471	GO:0019752
query_1	FALSE	1	72	32	1	0.03125	0.0138889	GO:0043967	GO:BP	histone H4 acetylation	21100	12539	GO:0016573
query_1	FALSE	1	475	32	1	0.03125	0.00210526	GO:0007346	GO:BP	regulation of mitotic cell cycle	21100	3225	c("GO:0000278", "GO:0051726")
query_1	FALSE	1	465	32	1	0.03125	0.00215054	GO:0007389	GO:BP	pattern specification process	21100	3266	c("GO:0007275", "GO:0032501")
query_1	FALSE	1	2430	32	5	0.15625	0.00205761	GO:0007399	GO:BP	nervous system development	21100	3276	GO:0048731
query_1	FALSE	1	183	32	1	0.03125	0.00546448	GO:0007416	GO:BP	synapse assembly	21100	3290	c("GO:0007399", "GO:0034329", "GO:0050808")
query_1	FALSE	1	1037	32	3	0.09375	0.00289296	GO:0007417	GO:BP	central nervous system development	21100	3291	c("GO:0007399", "GO:0048731")
query_1	FALSE	1	762	32	3	0.09375	0.00393701	GO:0007420	GO:BP	brain development	21100	3294	c("GO:0007417", "GO:0048513", "GO:0060322")
query_1	FALSE	1	585	32	1	0.03125	0.0017094	GO:0007423	GO:BP	sensory organ development	21100	3297	GO:0048513
query_1	FALSE	1	574	32	1	0.03125	0.00174216	GO:0007507	GO:BP	heart development	21100	3374	c("GO:0048513", "GO:0072359")
query_1	FALSE	1	282	32	1	0.03125	0.0035461	GO:0007548	GO:BP	sex differentiation	21100	3411	GO:0003006
query_1	FALSE	1	182	32	1	0.03125	0.00549451	GO:0007565	GO:BP	female pregnancy	21100	3428	c("GO:0044703", "GO:0044706")
query_1	FALSE	1	16	32	1	0.03125	0.0625	GO:0007567	GO:BP	parturition	21100	3430	c("GO:0044703", "GO:0044706")
query_1	FALSE	1	171	32	1	0.03125	0.00584795	GO:0007568	GO:BP	aging	21100	3431	GO:0032502
query_1	FALSE	1	154	32	1	0.03125	0.00649351	GO:0007584	GO:BP	response to nutrient	21100	3446	c("GO:0031667", "GO:0042221")
query_1	FALSE	1	611	32	1	0.03125	0.00163666	GO:0007610	GO:BP	behavior	21100	3470	GO:0032501
query_1	FALSE	1	263	32	1	0.03125	0.00380228	GO:0007611	GO:BP	learning or memory	21100	3471	c("GO:0007610", "GO:0050890")
query_1	FALSE	1	119	32	1	0.03125	0.00840336	GO:0007613	GO:BP	memory	21100	3473	GO:0007611
query_1	FALSE	1	34	32	1	0.03125	0.0294118	GO:0007616	GO:BP	long-term memory	21100	3476	GO:0007613
query_1	FALSE	1	1844	32	3	0.09375	0.0016269	GO:0008380	GO:BP	RNA splicing	21100	3608	GO:0006396
query_1	FALSE	1	31	32	1	0.03125	0.0322581	GO:0008299	GO:BP	isoprenoid biosynthetic process	21100	3576	c("GO:0006720", "GO:0008610", "GO:0044249")
query_1	FALSE	1	114	32	1	0.03125	0.00877193	GO:0008286	GO:BP	insulin receptor signaling pathway	21100	3570	c("GO:0007169", "GO:0032869")
query_1	FALSE	1	713	32	2	0.0625	0.00280505	GO:0008285	GO:BP	negative regulation of cell population proliferation	21100	3569	c("GO:0008283", "GO:0042127", "GO:0048523")
query_1	FALSE	1	1958	32	4	0.125	0.0020429	GO:0008283	GO:BP	cell population proliferation	21100	3567	GO:0009987
query_1	FALSE	1	2074	32	1	0.03125	0.00048216	GO:0008219	GO:BP	cell death	21100	3560	GO:0009987
query_1	FALSE	1	4768	32	9	0.28125	0.00188758	GO:0007275	GO:BP	multicellular organism development	21100	3166	c("GO:0032501", "GO:0048856")
query_1	FALSE	1	37	32	1	0.03125	0.027027	GO:0008210	GO:BP	estrogen metabolic process	21100	3551	c("GO:0008202", "GO:0034754")
query_1	FALSE	1	14415	32	25	0.78125	0.0017343	GO:0008152	GO:BP	metabolic process	21100	3531	GO:0008150
query_1	FALSE	1	21100	32	32	1	0.00151659	GO:0008150	GO:BP	biological_process	21100	3530	character(0)
query_1	FALSE	1	2665	32	5	0.15625	0.00187617	GO:0008104	GO:BP	protein localization	21100	3529	GO:0033036
query_1	FALSE	1	133	32	2	0.0625	0.0150376	GO:0008033	GO:BP	tRNA processing	21100	3502	c("GO:0006399", "GO:0034470")
query_1	FALSE	1	502	32	1	0.03125	0.00199203	GO:0008015	GO:BP	blood circulation	21100	3500	GO:0003013
query_1	FALSE	1	210	32	1	0.03125	0.0047619	GO:0007623	GO:BP	circadian rhythm	21100	3483	GO:0048511
query_1	FALSE	1	319	32	1	0.03125	0.0031348	GO:0008202	GO:BP	steroid metabolic process	21100	3543	c("GO:0006629", "GO:1901360")
query_1	FALSE	1	226	32	1	0.03125	0.00442478	GO:0008406	GO:BP	gonad development	21100	3609	c("GO:0045137", "GO:0048513", "GO:0048608")
query_1	FALSE	1	709	32	1	0.03125	0.00141044	GO:0007268	GO:BP	chemical synaptic transmission	21100	3159	GO:0098916
query_1	FALSE	1	613	32	1	0.03125	0.00163132	GO:0007169	GO:BP	transmembrane receptor protein tyrosine kinase signaling pathway	21100	3069	GO:0007167
query_1	FALSE	1	516	32	2	0.0625	0.00387597	GO:0006820	GO:BP	anion transport	21100	2774	GO:0006811
query_1	FALSE	1	90	32	2	0.0625	0.0222222	GO:0006835	GO:BP	dicarboxylic acid transport	21100	2784	GO:0046942
query_1	FALSE	1	211	32	1	0.03125	0.00473934	GO:0006836	GO:BP	neurotransmitter transport	21100	2785	GO:0006810
query_1	FALSE	1	7	32	1	0.03125	0.142857	GO:0006855	GO:BP	xenobiotic transmembrane transport	21100	2803	c("GO:0042908", "GO:0055085")
query_1	FALSE	1	39	32	1	0.03125	0.025641	GO:0006862	GO:BP	nucleotide transport	21100	2809	c("GO:0015748", "GO:0015931")
query_1	FALSE	1	147	32	1	0.03125	0.00680272	GO:0006865	GO:BP	amino acid transport	21100	2812	c("GO:0015849", "GO:0071705")
query_1	FALSE	1	506	32	1	0.03125	0.00197628	GO:0006873	GO:BP	cellular ion homeostasis	21100	2816	c("GO:0050801", "GO:0055082")
query_1	FALSE	1	418	32	1	0.03125	0.00239234	GO:0006875	GO:BP	cellular metal ion homeostasis	21100	2818	c("GO:0030003", "GO:0055065")
query_1	FALSE	1	63	32	1	0.03125	0.015873	GO:0006879	GO:BP	cellular iron ion homeostasis	21100	2822	c("GO:0046916", "GO:0055072")
query_1	FALSE	1	1084	32	3	0.09375	0.00276753	GO:0006886	GO:BP	intracellular protein transport	21100	2829	c("GO:0015031", "GO:0034613", "GO:0046907")
query_1	FALSE	1	360	32	1	0.03125	0.00277778	GO:0006887	GO:BP	exocytosis	21100	2830	c("GO:0016192", "GO:0032940")
query_1	FALSE	1	38	32	1	0.03125	0.0263158	GO:0006904	GO:BP	vesicle docking involved in exocytosis	21100	2845	c("GO:0048278", "GO:0140029")
query_1	FALSE	1	313	32	2	0.0625	0.00638978	GO:0006913	GO:BP	nucleocytoplasmic transport	21100	2853	GO:0051169
query_1	FALSE	1	541	32	1	0.03125	0.00184843	GO:0006914	GO:BP	autophagy	21100	2854	c("GO:0044248", "GO:0061919")
query_1	FALSE	1	1865	32	1	0.03125	0.000536193	GO:0006915	GO:BP	apoptotic process	21100	2855	GO:0012501
query_1	FALSE	1	3851	32	2	0.0625	0.000519346	GO:0006950	GO:BP	response to stress	21100	2884	GO:0050896
query_1	FALSE	1	1906	32	1	0.03125	0.000524659	GO:0006955	GO:BP	immune response	21100	2888	c("GO:0002376", "GO:0050896")
query_1	FALSE	1	951	32	1	0.03125	0.00105152	GO:0007167	GO:BP	enzyme-linked receptor protein signaling pathway	21100	3067	GO:0007166
query_1	FALSE	1	2811	32	1	0.03125	0.000355745	GO:0007166	GO:BP	cell surface receptor signaling pathway	21100	3066	GO:0007165
query_1	FALSE	1	5957	32	3	0.09375	0.000503609	GO:0007165	GO:BP	signal transduction	21100	3065	c("GO:0007154", "GO:0009987", "GO:0023052", "GO:0050794", "GO:0051716")
query_1	FALSE	1	49	32	1	0.03125	0.0204082	GO:0007157	GO:BP	heterophilic cell-cell adhesion via plasma membrane cell adhesion molecules	21100	3057	GO:0098742
query_1	FALSE	1	1489	32	1	0.03125	0.000671592	GO:0007155	GO:BP	cell adhesion	21100	3055	GO:0009987
query_1	FALSE	1	6508	32	5	0.15625	0.000768285	GO:0007154	GO:BP	cell communication	21100	3054	GO:0009987
query_1	FALSE	1	1661	32	2	0.0625	0.00120409	GO:0007267	GO:BP	cell-cell signaling	21100	3158	c("GO:0007154", "GO:0023052")
query_1	FALSE	1	42	32	1	0.03125	0.0238095	GO:0007099	GO:BP	centriole replication	21100	3008	c("GO:0022402", "GO:0051298", "GO:0098534")
query_1	FALSE	1	1774	32	4	0.125	0.00225479	GO:0007049	GO:BP	cell cycle	21100	2963	GO:0009987
query_1	FALSE	1	154	32	1	0.03125	0.00649351	GO:0007034	GO:BP	vacuolar transport	21100	2952	GO:0046907
query_1	FALSE	1	904	32	2	0.0625	0.00221239	GO:0007017	GO:BP	microtubule-based process	21100	2938	GO:0009987
query_1	FALSE	1	1453	32	2	0.0625	0.00137646	GO:0007010	GO:BP	cytoskeleton organization	21100	2933	GO:0006996
query_1	FALSE	1	528	32	1	0.03125	0.00189394	GO:0007005	GO:BP	mitochondrion organization	21100	2928	GO:0006996
query_1	FALSE	1	3874	32	4	0.125	0.00103252	GO:0006996	GO:BP	organelle organization	21100	2920	GO:0016043
query_1	FALSE	1	131	32	2	0.0625	0.0152672	GO:0007098	GO:BP	centrosome cycle	21100	3007	c("GO:0022402", "GO:0031023")
query_1	FALSE	1	141	32	1	0.03125	0.0070922	GO:0008584	GO:BP	male gonad development	21100	3618	c("GO:0008406", "GO:0046546")
query_1	FALSE	1	700	32	1	0.03125	0.00142857	GO:0008610	GO:BP	lipid biosynthetic process	21100	3629	c("GO:0006629", "GO:1901576")
query_1	FALSE	1	2559	32	2	0.0625	0.000781555	GO:0009056	GO:BP	catabolic process	21100	3659	GO:0008152
query_1	FALSE	1	15	32	1	0.03125	0.0666667	GO:0009812	GO:BP	flavonoid metabolic process	21100	4151	GO:0071704
query_1	FALSE	1	1940	32	2	0.0625	0.00103093	GO:0009888	GO:BP	tissue development	21100	4208	GO:0048856
query_1	FALSE	1	4145	32	12	0.375	0.00289505	GO:0009889	GO:BP	regulation of biosynthetic process	21100	4209	c("GO:0009058", "GO:0019222")
query_1	FALSE	1	1595	32	7	0.21875	0.00438871	GO:0009890	GO:BP	negative regulation of biosynthetic process	21100	4210	c("GO:0009058", "GO:0009889", "GO:0009892")
query_1	FALSE	1	1999	32	6	0.1875	0.0030015	GO:0009891	GO:BP	positive regulation of biosynthetic process	21100	4211	c("GO:0009058", "GO:0009889", "GO:0009893")
query_1	FALSE	1	3570	32	10	0.3125	0.00280112	GO:0009892	GO:BP	negative regulation of metabolic process	21100	4212	c("GO:0008152", "GO:0019222", "GO:0048519")
query_1	FALSE	1	3776	32	8	0.25	0.00211864	GO:0009893	GO:BP	positive regulation of metabolic process	21100	4213	c("GO:0008152", "GO:0019222", "GO:0048518")
query_1	FALSE	1	1009	32	1	0.03125	0.00099108	GO:0009894	GO:BP	regulation of catabolic process	21100	4214	c("GO:0009056", "GO:0019222")
query_1	FALSE	1	325	32	1	0.03125	0.00307692	GO:0009895	GO:BP	negative regulation of catabolic process	21100	4215	c("GO:0009056", "GO:0009892", "GO:0009894")
query_1	FALSE	1	295	32	1	0.03125	0.00338983	GO:0009914	GO:BP	hormone transport	21100	4230	c("GO:0006810", "GO:0010817")
query_1	FALSE	1	221	32	1	0.03125	0.00452489	GO:0009952	GO:BP	anterior/posterior pattern specification	21100	4252	GO:0003002
query_1	FALSE	1	2947	32	3	0.09375	0.00101798	GO:0009966	GO:BP	regulation of signal transduction	21100	4266	c("GO:0007165", "GO:0010646", "GO:0023051", "GO:0048583")
query_1	FALSE	1	1513	32	1	0.03125	0.000660939	GO:0009967	GO:BP	positive regulation of signal transduction	21100	4267	c("GO:0007165", "GO:0009966", "GO:0010647", "GO:0023056", "GO:0048584")
query_1	FALSE	1	1243	32	1	0.03125	0.000804505	GO:0009968	GO:BP	negative regulation of signal transduction	21100	4268	c("GO:0007165", "GO:0009966", "GO:0010648", "GO:0023057", "GO:0048585")
query_1	FALSE	1	19395	32	32	1	0.00164991	GO:0009987	GO:BP	cellular process	21100	4273	GO:0008150
query_1	FALSE	1	490	32	2	0.0625	0.00408163	GO:0009991	GO:BP	response to extracellular stimulus	21100	4277	GO:0009605
query_1	FALSE	1	3010	32	5	0.15625	0.00166113	GO:0010033	GO:BP	response to organic substance	21100	4307	GO:0042221
query_1	FALSE	1	695	32	3	0.09375	0.00431655	GO:0010564	GO:BP	regulation of cell cycle process	21100	4715	c("GO:0022402", "GO:0051726")
query_1	FALSE	1	1508	32	7	0.21875	0.00464191	GO:0010558	GO:BP	negative regulation of macromolecule biosynthetic process	21100	4709	c("GO:0009059", "GO:0009890", "GO:0010556", "GO:0010605")
query_1	FALSE	1	1859	32	6	0.1875	0.00322754	GO:0010557	GO:BP	positive regulation of macromolecule biosynthetic process	21100	4708	c("GO:0009059", "GO:0009891", "GO:0010556", "GO:0010604")
query_1	FALSE	1	3926	32	12	0.375	0.00305655	GO:0010556	GO:BP	regulation of macromolecule biosynthetic process	21100	4707	c("GO:0009059", "GO:0009889", "GO:0060255")
query_1	FALSE	1	83	32	1	0.03125	0.0120482	GO:0010507	GO:BP	negative regulation of autophagy	21100	4673	c("GO:0006914", "GO:0010506", "GO:0031330")
query_1	FALSE	1	339	32	1	0.03125	0.00294985	GO:0010506	GO:BP	regulation of autophagy	21100	4672	c("GO:0006914", "GO:0031329")
query_1	FALSE	1	8	32	1	0.03125	0.125	GO:0009804	GO:BP	coumarin metabolic process	21100	4143	c("GO:0009698", "GO:0046483")
query_1	FALSE	1	5452	32	14	0.4375	0.00256787	GO:0010468	GO:BP	regulation of gene expression	21100	4649	c("GO:0010467", "GO:0060255")
query_1	FALSE	1	1010	32	1	0.03125	0.000990099	GO:0010243	GO:BP	response to organonitrogen compound	21100	4496	c("GO:0010033", "GO:1901698")
query_1	FALSE	1	87	32	1	0.03125	0.0114943	GO:0010232	GO:BP	vascular transport	21100	4488	c("GO:0003018", "GO:0006810")
query_1	FALSE	1	4	32	1	0.03125	0.25	GO:0010041	GO:BP	response to iron(III) ion	21100	4315	GO:0010039
query_1	FALSE	1	31	32	1	0.03125	0.0322581	GO:0010039	GO:BP	response to iron ion	21100	4313	GO:0010038
query_1	FALSE	1	350	32	1	0.03125	0.00285714	GO:0010038	GO:BP	response to metal ion	21100	4312	GO:0010035
query_1	FALSE	1	538	32	1	0.03125	0.00185874	GO:0010035	GO:BP	response to inorganic substance	21100	4309	GO:0042221
query_1	FALSE	1	8963	32	20	0.625	0.0022314	GO:0010467	GO:BP	gene expression	21100	4648	GO:0043170
query_1	FALSE	1	674	32	1	0.03125	0.00148368	GO:0009792	GO:BP	embryo development ending in birth or egg hatching	21100	4134	GO:0009790
query_1	FALSE	1	1110	32	1	0.03125	0.000900901	GO:0009790	GO:BP	embryo development	21100	4132	GO:0007275
query_1	FALSE	1	1	32	1	0.03125	1	GO:0009789	GO:BP	positive regulation of abscisic acid-activated signaling pathway	21100	4131	c("GO:0009738", "GO:0009787", "GO:0009967")
query_1	FALSE	1	1549	32	1	0.03125	0.000645578	GO:0009607	GO:BP	response to biotic stimulus	21100	3979	GO:0050896
query_1	FALSE	1	2788	32	3	0.09375	0.00107604	GO:0009605	GO:BP	response to external stimulus	21100	3977	GO:0050896
query_1	FALSE	1	171	32	2	0.0625	0.0116959	GO:0009451	GO:BP	RNA modification	21100	3940	c("GO:0016070", "GO:0043412")
query_1	FALSE	1	314	32	1	0.03125	0.00318471	GO:0009416	GO:BP	response to light stimulus	21100	3921	GO:0009314
query_1	FALSE	1	408	32	1	0.03125	0.00245098	GO:0009410	GO:BP	response to xenobiotic stimulus	21100	3915	GO:0042221
query_1	FALSE	1	17	32	1	0.03125	0.0588235	GO:0009404	GO:BP	toxin metabolic process	21100	3909	c("GO:0019748", "GO:0044237")
query_1	FALSE	1	558	32	1	0.03125	0.00179211	GO:0009611	GO:BP	response to wounding	21100	3983	GO:0006950
query_1	FALSE	1	442	32	1	0.03125	0.00226244	GO:0009314	GO:BP	response to radiation	21100	3894	GO:0009628
query_1	FALSE	1	339	32	2	0.0625	0.00589971	GO:0009306	GO:BP	protein secretion	21100	3886	c("GO:0015031", "GO:0032940", "GO:0035592")
query_1	FALSE	1	45	32	1	0.03125	0.0222222	GO:0009250	GO:BP	glucan biosynthetic process	21100	3847	c("GO:0006073", "GO:0033692")
query_1	FALSE	1	14	32	1	0.03125	0.0714286	GO:0009235	GO:BP	cobalamin metabolic process	21100	3833	c("GO:0006767", "GO:0033013")
query_1	FALSE	1	4770	32	13	0.40625	0.00272537	GO:0009059	GO:BP	macromolecule biosynthetic process	21100	3662	c("GO:0043170", "GO:1901576")
query_1	FALSE	1	5861	32	15	0.46875	0.00255929	GO:0009058	GO:BP	biosynthetic process	21100	3661	GO:0008152
query_1	FALSE	1	1359	32	1	0.03125	0.000735835	GO:0009057	GO:BP	macromolecule catabolic process	21100	3660	c("GO:0043170", "GO:1901575")
query_1	FALSE	1	141	32	1	0.03125	0.0070922	GO:0009308	GO:BP	amine metabolic process	21100	3888	GO:1901564
query_1	FALSE	1	1551	32	2	0.0625	0.00128949	GO:0006811	GO:BP	ion transport	21100	2767	GO:0006810
query_1	FALSE	1	389	32	1	0.03125	0.00257069	GO:0009615	GO:BP	response to virus	21100	3986	GO:0051707
query_1	FALSE	1	3	32	1	0.03125	0.333333	GO:0009624	GO:BP	response to nematode	21100	3992	GO:0051707
query_1	FALSE	1	1	32	1	0.03125	1	GO:0009787	GO:BP	regulation of abscisic acid-activated signaling pathway	21100	4129	c("GO:0009738", "GO:0009966", "GO:1905957")
query_1	FALSE	1	191	32	1	0.03125	0.0052356	GO:0009755	GO:BP	hormone-mediated signaling pathway	21100	4103	c("GO:0007165", "GO:0032870")
query_1	FALSE	1	1	32	1	0.03125	1	GO:0009738	GO:BP	abscisic acid-activated signaling pathway	21100	4086	c("GO:0009755", "GO:0071215")
query_1	FALSE	1	1	32	1	0.03125	1	GO:0009737	GO:BP	response to abscisic acid	21100	4085	c("GO:0009725", "GO:0033993", "GO:0097305")
query_1	FALSE	1	839	32	2	0.0625	0.00238379	GO:0009725	GO:BP	response to hormone	21100	4073	c("GO:0009719", "GO:0010033")
query_1	FALSE	1	1557	32	3	0.09375	0.00192678	GO:0009719	GO:BP	response to endogenous stimulus	21100	4067	GO:0050896
query_1	FALSE	1	748	32	1	0.03125	0.0013369	GO:0009617	GO:BP	response to bacterium	21100	3988	GO:0051707
query_1	FALSE	1	8	32	1	0.03125	0.125	GO:0009698	GO:BP	phenylpropanoid metabolic process	21100	4051	c("GO:0006725", "GO:0019748", "GO:1901360")
query_1	FALSE	1	2702	32	2	0.0625	0.000740192	GO:0009653	GO:BP	anatomical structure morphogenesis	21100	4021	c("GO:0032502", "GO:0048856")
query_1	FALSE	1	34	32	1	0.03125	0.0294118	GO:0009649	GO:BP	entrainment of circadian clock	21100	4017	c("GO:0009605", "GO:0042752")
query_1	FALSE	1	33	32	1	0.03125	0.030303	GO:0009648	GO:BP	photoperiodism	21100	4016	GO:0009416
query_1	FALSE	1	231	32	1	0.03125	0.004329	GO:0009636	GO:BP	response to toxic substance	21100	4004	GO:0042221
query_1	FALSE	1	5	32	1	0.03125	0.2	GO:0009635	GO:BP	response to herbicide	21100	4003	c("GO:0006950", "GO:0009636")
query_1	FALSE	1	1130	32	2	0.0625	0.00176991	GO:0009628	GO:BP	response to abiotic stimulus	21100	3996	GO:0050896
query_1	FALSE	1	1	32	1	0.03125	1	GO:0009692	GO:BP	ethylene metabolic process	21100	4045	GO:0043449
query_1	FALSE	1	4742	32	6	0.1875	0.00126529	GO:0006810	GO:BP	transport	21100	2766	GO:0051234
query_1	FALSE	1	12153	32	23	0.71875	0.00189254	GO:0006807	GO:BP	nitrogen compound metabolic process	21100	2763	GO:0008152
query_1	FALSE	1	107	32	1	0.03125	0.00934579	GO:0006805	GO:BP	xenobiotic metabolic process	21100	2761	c("GO:0044237", "GO:0071466")
query_1	FALSE	1	394	32	1	0.03125	0.00253807	GO:0001701	GO:BP	in utero embryonic development	21100	504	GO:0043009
query_1	FALSE	1	68	32	1	0.03125	0.0147059	GO:0001756	GO:BP	somitogenesis	21100	537	c("GO:0009952", "GO:0035282", "GO:0043009", "GO:0048646", "GO:0061053")
query_1	FALSE	1	1094	32	2	0.0625	0.00182815	GO:0001775	GO:BP	cell activation	21100	552	GO:0009987
query_1	FALSE	1	732	32	1	0.03125	0.00136612	GO:0001816	GO:BP	cytokine production	21100	585	c("GO:0010467", "GO:0032501")
query_1	FALSE	1	726	32	1	0.03125	0.00137741	GO:0001817	GO:BP	regulation of cytokine production	21100	586	c("GO:0001816", "GO:0010468", "GO:0051239")
query_1	FALSE	1	470	32	1	0.03125	0.00212766	GO:0001819	GO:BP	positive regulation of cytokine production	21100	588	c("GO:0001816", "GO:0001817", "GO:0010628", "GO:0051240")
query_1	FALSE	1	128	32	1	0.03125	0.0078125	GO:0001838	GO:BP	embryonic epithelial tube formation	21100	607	c("GO:0016331", "GO:0072175")
query_1	FALSE	1	107	32	1	0.03125	0.00934579	GO:0001841	GO:BP	neural tube formation	21100	610	c("GO:0001838", "GO:0021915")
query_1	FALSE	1	93	32	1	0.03125	0.0107527	GO:0001843	GO:BP	neural tube closure	21100	612	c("GO:0014020", "GO:0060606")
query_1	FALSE	1	134	32	1	0.03125	0.00746269	GO:0001889	GO:BP	liver development	21100	628	c("GO:0048732", "GO:0061008")
query_1	FALSE	1	731	32	1	0.03125	0.00136799	GO:0001944	GO:BP	vasculature development	21100	671	c("GO:0048731", "GO:0072359")
query_1	FALSE	1	535	32	1	0.03125	0.00186916	GO:0002009	GO:BP	morphogenesis of an epithelium	21100	729	c("GO:0048729", "GO:0060429")
query_1	FALSE	1	7	32	1	0.03125	0.142857	GO:0002036	GO:BP	regulation of L-glutamate import across plasma membrane	21100	755	c("GO:0010958", "GO:0098712", "GO:1903959")
query_1	FALSE	1	10	32	1	0.03125	0.1	GO:0002138	GO:BP	retinoic acid biosynthetic process	21100	829	c("GO:0016102", "GO:0042573", "GO:0072330")
query_1	FALSE	1	76	32	1	0.03125	0.0131579	GO:0002200	GO:BP	somatic diversification of immune receptors	21100	861	c("GO:0002376", "GO:0002520")
query_1	FALSE	1	342	32	1	0.03125	0.00292398	GO:0002237	GO:BP	response to molecule of bacterial origin	21100	893	c("GO:0009617", "GO:0010033", "GO:0043207")
query_1	FALSE	1	150	32	1	0.03125	0.00666667	GO:0002244	GO:BP	hematopoietic progenitor cell differentiation	21100	900	c("GO:0030097", "GO:0030154")
query_1	FALSE	1	587	32	2	0.0625	0.00340716	GO:0003013	GO:BP	circulatory system process	21100	1589	GO:0003008
query_1	FALSE	1	2235	32	3	0.09375	0.00134228	GO:0003008	GO:BP	system process	21100	1584	GO:0032501
query_1	FALSE	1	1013	32	1	0.03125	0.000987167	GO:0003006	GO:BP	developmental process involved in reproduction	21100	1582	c("GO:0022414", "GO:0032502")
query_1	FALSE	1	355	32	1	0.03125	0.0028169	GO:0003002	GO:BP	regionalization	21100	1578	GO:0007389
query_1	FALSE	1	7	32	1	0.03125	0.142857	GO:0002933	GO:BP	lipid hydroxylation	21100	1565	GO:0030258
query_1	FALSE	1	54	32	1	0.03125	0.0185185	GO:0002931	GO:BP	response to ischemia	21100	1563	GO:0006950
query_1	FALSE	1	110	32	1	0.03125	0.00909091	GO:0001676	GO:BP	long-chain fatty acid metabolic process	21100	491	GO:0006631
query_1	FALSE	1	183	32	1	0.03125	0.00546448	GO:0002791	GO:BP	regulation of peptide secretion	21100	1426	c("GO:0002790", "GO:0051046", "GO:0090087")
query_1	FALSE	1	620	32	1	0.03125	0.0016129	GO:0002694	GO:BP	regulation of leukocyte activation	21100	1335	c("GO:0002682", "GO:0045321", "GO:0050865")
query_1	FALSE	1	1442	32	1	0.03125	0.000693481	GO:0002682	GO:BP	regulation of immune system process	21100	1323	c("GO:0002376", "GO:0050789")
query_1	FALSE	1	69	32	1	0.03125	0.0144928	GO:0002562	GO:BP	somatic diversification of immune receptors via germline recombination within a single locus	21100	1206	c("GO:0002200", "GO:0016444")
query_1	FALSE	1	563	32	2	0.0625	0.0035524	GO:0002521	GO:BP	leukocyte differentiation	21100	1166	c("GO:0030097", "GO:0030154")
query_1	FALSE	1	996	32	3	0.09375	0.00301205	GO:0002520	GO:BP	immune system development	21100	1165	c("GO:0002376", "GO:0048731")
query_1	FALSE	1	2781	32	4	0.125	0.00143833	GO:0002376	GO:BP	immune system process	21100	1029	GO:0008150
query_1	FALSE	1	229	32	1	0.03125	0.00436681	GO:0002790	GO:BP	peptide secretion	21100	1425	c("GO:0015833", "GO:0046903")
query_1	FALSE	1	302	32	1	0.03125	0.00331126	GO:0001666	GO:BP	response to hypoxia	21100	488	c("GO:0006950", "GO:0036293")
query_1	FALSE	1	178	32	1	0.03125	0.00561798	GO:0001659	GO:BP	temperature homeostasis	21100	484	GO:0048871
query_1	FALSE	1	390	32	1	0.03125	0.0025641	GO:0001654	GO:BP	eye development	21100	479	c("GO:0007423", "GO:0150063")
query_1	FALSE	1	36	32	1	0.03125	0.0277778	GO:0000460	GO:BP	maturation of 5.8S rRNA	21100	204	GO:0006364
query_1	FALSE	1	9	32	1	0.03125	0.111111	GO:0000447	GO:BP	endonucleolytic cleavage in ITS1 to separate SSU-rRNA from 5.8S rRNA and LSU-rRNA from tricistronic rRNA transcript (SSU-rRNA, 5.8S rRNA, LSU-rRNA)	21100	191	c("GO:0000462", "GO:0000466", "GO:0000479")
query_1	FALSE	1	1724	32	3	0.09375	0.00174014	GO:0000398	GO:BP	mRNA splicing, via spliceosome	21100	168	c("GO:0000377", "GO:0006397")
query_1	FALSE	1	62	32	1	0.03125	0.016129	GO:0000381	GO:BP	regulation of alternative mRNA splicing, via spliceosome	21100	160	c("GO:0000380", "GO:0048024")
query_1	FALSE	1	79	32	1	0.03125	0.0126582	GO:0000380	GO:BP	alternative mRNA splicing, via spliceosome	21100	159	GO:0000398
query_1	FALSE	1	1724	32	3	0.09375	0.00174014	GO:0000377	GO:BP	RNA splicing, via transesterification reactions with bulged adenosine as nucleophile	21100	156	GO:0000375
query_1	FALSE	1	37	32	2	0.0625	0.0540541	GO:0000462	GO:BP	maturation of SSU-rRNA from tricistronic rRNA transcript (SSU-rRNA, 5.8S rRNA, LSU-rRNA)	21100	206	GO:0030490
query_1	FALSE	1	1728	32	3	0.09375	0.00173611	GO:0000375	GO:BP	RNA splicing, via transesterification reactions	21100	154	GO:0008380
query_1	FALSE	1	72	32	1	0.03125	0.0138889	GO:0000271	GO:BP	polysaccharide biosynthetic process	21100	116	c("GO:0005976", "GO:0009059", "GO:0016051")
query_1	FALSE	1	630	32	2	0.0625	0.0031746	GO:0000226	GO:BP	microtubule cytoskeleton organization	21100	103	c("GO:0007010", "GO:0007017")
query_1	FALSE	1	941	32	5	0.15625	0.0053135	GO:0000122	GO:BP	negative regulation of transcription by RNA polymerase II	21100	64	c("GO:0006357", "GO:0006366", "GO:0045892")
query_1	FALSE	1	205	32	1	0.03125	0.00487805	GO:0000082	GO:BP	G1/S transition of mitotic cell cycle	21100	41	c("GO:0044772", "GO:0044843")
query_1	FALSE	1	8	32	1	0.03125	0.125	GO:0000056	GO:BP	ribosomal small subunit export from nucleus	21100	27	GO:0000054
query_1	FALSE	1	15	32	1	0.03125	0.0666667	GO:0000054	GO:BP	ribosomal subunit export from nucleus	21100	25	c("GO:0031503", "GO:0033750", "GO:0042254", "GO:0051168", "GO:0051656")
query_1	FALSE	1	906	32	1	0.03125	0.00110375	GO:0000278	GO:BP	mitotic cell cycle	21100	118	GO:0007049
query_1	FALSE	1	260	32	2	0.0625	0.00769231	GO:0003018	GO:BP	vascular process in circulatory system	21100	1594	GO:0003013
query_1	FALSE	1	24	32	1	0.03125	0.0416667	GO:0000466	GO:BP	maturation of 5.8S rRNA from tricistronic rRNA transcript (SSU-rRNA, 5.8S rRNA, LSU-rRNA)	21100	210	GO:0000460
query_1	FALSE	1	5	32	1	0.03125	0.2	GO:0000472	GO:BP	endonucleolytic cleavage to generate mature 5'-end of SSU-rRNA from (SSU-rRNA, 5.8S rRNA, LSU-rRNA)	21100	216	c("GO:0000462", "GO:0000479", "GO:0000967")
query_1	FALSE	1	700	32	1	0.03125	0.00142857	GO:0001568	GO:BP	blood vessel development	21100	464	c("GO:0001944", "GO:0048856")
query_1	FALSE	1	425	32	1	0.03125	0.00235294	GO:0001558	GO:BP	regulation of cell growth	21100	457	c("GO:0016049", "GO:0040008", "GO:0051128")
query_1	FALSE	1	521	32	1	0.03125	0.00191939	GO:0001525	GO:BP	angiogenesis	21100	437	c("GO:0048514", "GO:0048646")
query_1	FALSE	1	86	32	1	0.03125	0.0116279	GO:0001523	GO:BP	retinoid metabolic process	21100	436	GO:0016101
query_1	FALSE	1	82	32	1	0.03125	0.0121951	GO:0001510	GO:BP	RNA methylation	21100	431	c("GO:0009451", "GO:0043414")
query_1	FALSE	1	218	32	1	0.03125	0.00458716	GO:0001505	GO:BP	regulation of neurotransmitter levels	21100	427	GO:0065008
query_1	FALSE	1	27	32	1	0.03125	0.037037	GO:0000469	GO:BP	cleavage involved in rRNA processing	21100	213	c("GO:0006364", "GO:0090501")
query_1	FALSE	1	42	32	1	0.03125	0.0238095	GO:0001504	GO:BP	neurotransmitter uptake	21100	426	c("GO:0001505", "GO:0006836", "GO:0098657")
query_1	FALSE	1	7	32	1	0.03125	0.142857	GO:0001408	GO:BP	guanine nucleotide transport	21100	421	GO:0015865
query_1	FALSE	1	5	32	1	0.03125	0.2	GO:0000967	GO:BP	rRNA 5'-end processing	21100	344	c("GO:0006364", "GO:0034471")
query_1	FALSE	1	23	32	1	0.03125	0.0434783	GO:0000966	GO:BP	RNA 5'-end processing	21100	343	GO:0006396
query_1	FALSE	1	7	32	1	0.03125	0.142857	GO:0000480	GO:BP	endonucleolytic cleavage in 5'-ETS of tricistronic rRNA transcript (SSU-rRNA, 5.8S rRNA, LSU-rRNA)	21100	224	c("GO:0000462", "GO:0000479")
query_1	FALSE	1	15	32	1	0.03125	0.0666667	GO:0000479	GO:BP	endonucleolytic cleavage of tricistronic rRNA transcript (SSU-rRNA, 5.8S rRNA, LSU-rRNA)	21100	223	GO:0000478
query_1	FALSE	1	15	32	1	0.03125	0.0666667	GO:0000478	GO:BP	endonucleolytic cleavage involved in rRNA processing	21100	222	c("GO:0000469", "GO:0090502")
query_1	FALSE	1	535	32	1	0.03125	0.00186916	GO:0001501	GO:BP	skeletal system development	21100	423	GO:0048731
query_1	FALSE	1	3465	32	8	0.25	0.0023088	GO:0010604	GO:BP	positive regulation of macromolecule metabolic process	21100	4750	c("GO:0009893", "GO:0043170", "GO:0060255")
query_1	FALSE	1	99	32	1	0.03125	0.010101	GO:0003333	GO:BP	amino acid transmembrane transport	21100	1902	c("GO:0006865", "GO:1905039")
query_1	FALSE	1	106	32	1	0.03125	0.00943396	GO:0005976	GO:BP	polysaccharide metabolic process	21100	2010	c("GO:0005975", "GO:0043170")
query_1	FALSE	1	3719	32	5	0.15625	0.00134445	GO:0006464	GO:BP	cellular protein modification process	21100	2443	c("GO:0036211", "GO:0044267")
query_1	FALSE	1	1587	32	1	0.03125	0.00063012	GO:0006468	GO:BP	protein phosphorylation	21100	2446	c("GO:0006464", "GO:0016310")
query_1	FALSE	1	219	32	2	0.0625	0.00913242	GO:0006473	GO:BP	protein acetylation	21100	2450	GO:0043543
query_1	FALSE	1	17	32	1	0.03125	0.0588235	GO:0006474	GO:BP	N-terminal protein amino acid acetylation	21100	2451	c("GO:0006473", "GO:0031365", "GO:0051604")
query_1	FALSE	1	179	32	1	0.03125	0.00558659	GO:0006475	GO:BP	internal protein amino acid acetylation	21100	2452	GO:0006473
query_1	FALSE	1	121	32	2	0.0625	0.0165289	GO:0006476	GO:BP	protein deacetylation	21100	2453	GO:0035601
query_1	FALSE	1	1787	32	1	0.03125	0.000559597	GO:0006508	GO:BP	proteolysis	21100	2483	GO:0019538
query_1	FALSE	1	894	32	3	0.09375	0.0033557	GO:0006518	GO:BP	peptide metabolic process	21100	2492	c("GO:0043603", "GO:1901564")
query_1	FALSE	1	313	32	1	0.03125	0.00319489	GO:0006520	GO:BP	cellular amino acid metabolic process	21100	2493	c("GO:0019752", "GO:0044238", "GO:1901564")
query_1	FALSE	1	4	32	1	0.03125	0.25	GO:0006556	GO:BP	S-adenosylmethionine biosynthetic process	21100	2529	c("GO:0044272", "GO:0046500", "GO:1901576")
query_1	FALSE	1	190	32	2	0.0625	0.0105263	GO:0006575	GO:BP	cellular modified amino acid metabolic process	21100	2548	c("GO:0044237", "GO:1901564")
query_1	FALSE	1	535	32	1	0.03125	0.00186916	GO:0006605	GO:BP	protein targeting	21100	2577	GO:0006886
query_1	FALSE	1	163	32	1	0.03125	0.00613497	GO:0006606	GO:BP	protein import into nucleus	21100	2578	c("GO:0006886", "GO:0034504", "GO:0051170", "GO:0072594")
query_1	FALSE	1	36	32	1	0.03125	0.0277778	GO:0006623	GO:BP	protein targeting to vacuole	21100	2595	c("GO:0006605", "GO:0007034", "GO:0072666")
query_1	FALSE	1	1392	32	2	0.0625	0.00143678	GO:0006629	GO:BP	lipid metabolic process	21100	2601	c("GO:0044238", "GO:0071704")
query_1	FALSE	1	392	32	2	0.0625	0.00510204	GO:0006631	GO:BP	fatty acid metabolic process	21100	2603	c("GO:0032787", "GO:0044255")
query_1	FALSE	1	154	32	1	0.03125	0.00649351	GO:0006633	GO:BP	fatty acid biosynthetic process	21100	2604	c("GO:0006631", "GO:0008610", "GO:0072330")
query_1	FALSE	1	2781	32	1	0.03125	0.000359583	GO:0006796	GO:BP	phosphate-containing compound metabolic process	21100	2752	GO:0006793
query_1	FALSE	1	2803	32	1	0.03125	0.000356761	GO:0006793	GO:BP	phosphorus metabolic process	21100	2749	GO:0044237
query_1	FALSE	1	343	32	3	0.09375	0.00874636	GO:0006790	GO:BP	sulfur compound metabolic process	21100	2746	GO:0044237
query_1	FALSE	1	54	32	1	0.03125	0.0185185	GO:0006778	GO:BP	porphyrin-containing compound metabolic process	21100	2734	GO:0033013
query_1	FALSE	1	45	32	1	0.03125	0.0222222	GO:0006775	GO:BP	fat-soluble vitamin metabolic process	21100	2731	GO:0006766
query_1	FALSE	1	62	32	2	0.0625	0.0322581	GO:0006767	GO:BP	water-soluble vitamin metabolic process	21100	2725	GO:0006766
query_1	FALSE	1	214	32	1	0.03125	0.0046729	GO:0006457	GO:BP	protein folding	21100	2437	GO:0009987
query_1	FALSE	1	110	32	3	0.09375	0.0272727	GO:0006766	GO:BP	vitamin metabolic process	21100	2724	GO:0044281
query_1	FALSE	1	63	32	1	0.03125	0.015873	GO:0006749	GO:BP	glutathione metabolic process	21100	2713	c("GO:0006518", "GO:0006575", "GO:0006790")
query_1	FALSE	1	39	32	1	0.03125	0.025641	GO:0006730	GO:BP	one-carbon metabolic process	21100	2697	c("GO:0044237", "GO:0044281")
query_1	FALSE	1	100	32	1	0.03125	0.01	GO:0006721	GO:BP	terpenoid metabolic process	21100	2689	GO:0006720
query_1	FALSE	1	121	32	1	0.03125	0.00826446	GO:0006720	GO:BP	isoprenoid metabolic process	21100	2688	GO:0044255
query_1	FALSE	1	170	32	1	0.03125	0.00588235	GO:0006694	GO:BP	steroid biosynthetic process	21100	2662	c("GO:0008202", "GO:0008610", "GO:1901362")
query_1	FALSE	1	119	32	1	0.03125	0.00840336	GO:0006690	GO:BP	icosanoid metabolic process	21100	2658	GO:0019752
query_1	FALSE	1	26	32	1	0.03125	0.0384615	GO:0006760	GO:BP	folic acid-containing compound metabolic process	21100	2721	c("GO:0006575", "GO:0042558")
query_1	FALSE	1	2	32	1	0.03125	0.5	GO:0006431	GO:BP	methionyl-tRNA aminoacylation	21100	2420	GO:0006418
query_1	FALSE	1	43	32	1	0.03125	0.0232558	GO:0006418	GO:BP	tRNA aminoacylation for protein translation	21100	2407	c("GO:0006412", "GO:0043039")
query_1	FALSE	1	393	32	1	0.03125	0.00254453	GO:0006417	GO:BP	regulation of translation	21100	2406	c("GO:0006412", "GO:0010608", "GO:0032268", "GO:0034248", "GO:2000112")
query_1	FALSE	1	7998	32	21	0.65625	0.00262566	GO:0006139	GO:BP	nucleobase-containing compound metabolic process	21100	2164	c("GO:0006725", "GO:0034641", "GO:0044238", "GO:0046483", "GO:1901360")
query_1	FALSE	1	85	32	1	0.03125	0.0117647	GO:0006112	GO:BP	energy reserve metabolic process	21100	2140	GO:0015980
query_1	FALSE	1	48	32	1	0.03125	0.0208333	GO:0006111	GO:BP	regulation of gluconeogenesis	21100	2139	c("GO:0006094", "GO:0010906", "GO:0043255")
query_1	FALSE	1	179	32	1	0.03125	0.00558659	GO:0006109	GO:BP	regulation of carbohydrate metabolic process	21100	2137	c("GO:0005975", "GO:0080090")
query_1	FALSE	1	76	32	2	0.0625	0.0263158	GO:0006094	GO:BP	gluconeogenesis	21100	2123	c("GO:0006006", "GO:0019319")
query_1	FALSE	1	501	32	1	0.03125	0.00199601	GO:0006091	GO:BP	generation of precursor metabolites and energy	21100	2122	GO:0044237
query_1	FALSE	1	1023	32	2	0.0625	0.00195503	GO:0006259	GO:BP	DNA metabolic process	21100	2277	c("GO:0044260", "GO:0090304")
query_1	FALSE	1	18	32	1	0.03125	0.0555556	GO:0006089	GO:BP	lactate metabolic process	21100	2120	c("GO:0032787", "GO:1901615")
query_1	FALSE	1	73	32	1	0.03125	0.0136986	GO:0006073	GO:BP	cellular glucan metabolic process	21100	2105	c("GO:0044042", "GO:0044264")
query_1	FALSE	1	365	32	1	0.03125	0.00273973	GO:0006066	GO:BP	alcohol metabolic process	21100	2098	c("GO:0044281", "GO:1901615")
query_1	FALSE	1	194	32	2	0.0625	0.0103093	GO:0006006	GO:BP	glucose metabolic process	21100	2040	GO:0019318
query_1	FALSE	1	258	32	2	0.0625	0.00775194	GO:0005996	GO:BP	monosaccharide metabolic process	21100	2030	c("GO:0005975", "GO:0044281")
query_1	FALSE	1	45	32	1	0.03125	0.0222222	GO:0005978	GO:BP	glycogen biosynthetic process	21100	2012	c("GO:0005977", "GO:0009250")
query_1	FALSE	1	72	32	1	0.03125	0.0138889	GO:0005977	GO:BP	glycogen metabolic process	21100	2011	c("GO:0006073", "GO:0006112")
query_1	FALSE	1	988	32	4	0.125	0.00404858	GO:0006082	GO:BP	organic acid metabolic process	21100	2114	c("GO:0044237", "GO:0044281", "GO:0071704")
query_1	FALSE	1	590	32	3	0.09375	0.00508475	GO:0005975	GO:BP	carbohydrate metabolic process	21100	2009	c("GO:0044238", "GO:0071704")
query_1	FALSE	1	117	32	1	0.03125	0.00854701	GO:0006304	GO:BP	DNA modification	21100	2319	c("GO:0006259", "GO:0043412")
query_1	FALSE	1	72	32	1	0.03125	0.0138889	GO:0006306	GO:BP	DNA methylation	21100	2321	c("GO:0006305", "GO:0043414", "GO:0044728")
query_1	FALSE	1	707	32	2	0.0625	0.00282885	GO:0006412	GO:BP	translation	21100	2402	c("GO:0010467", "GO:0034645", "GO:0043043", "GO:0044267")
query_1	FALSE	1	94	32	2	0.0625	0.0212766	GO:0006400	GO:BP	tRNA modification	21100	2391	c("GO:0008033", "GO:0009451")
query_1	FALSE	1	197	32	3	0.09375	0.0152284	GO:0006399	GO:BP	tRNA metabolic process	21100	2390	GO:0034660
query_1	FALSE	1	1917	32	4	0.125	0.00208659	GO:0006397	GO:BP	mRNA processing	21100	2388	c("GO:0006396", "GO:0016071")
query_1	FALSE	1	3357	32	10	0.3125	0.00297885	GO:0006396	GO:BP	RNA processing	21100	2387	c("GO:0010467", "GO:0016070")
query_1	FALSE	1	2653	32	7	0.21875	0.00263852	GO:0006366	GO:BP	transcription by RNA polymerase II	21100	2362	GO:0006351
query_1	FALSE	1	72	32	1	0.03125	0.0138889	GO:0006305	GO:BP	DNA alkylation	21100	2320	GO:0006304
query_1	FALSE	1	53	32	1	0.03125	0.0188679	GO:0006360	GO:BP	transcription by RNA polymerase I	21100	2357	GO:0006351
query_1	FALSE	1	34	32	1	0.03125	0.0294118	GO:0006356	GO:BP	regulation of transcription by RNA polymerase I	21100	2354	c("GO:0006355", "GO:0006360")
query_1	FALSE	1	3451	32	12	0.375	0.00347725	GO:0006355	GO:BP	regulation of transcription, DNA-templated	21100	2353	c("GO:0006351", "GO:0010468", "GO:1903506")
query_1	FALSE	1	3579	32	12	0.375	0.00335289	GO:0006351	GO:BP	transcription, DNA-templated	21100	2349	GO:0097659
query_1	FALSE	1	294	32	1	0.03125	0.00340136	GO:0006338	GO:BP	chromatin remodeling	21100	2343	GO:0006325
query_1	FALSE	1	626	32	2	0.0625	0.00319489	GO:0006325	GO:BP	chromatin organization	21100	2333	c("GO:0016043", "GO:0051276")
query_1	FALSE	1	321	32	1	0.03125	0.00311526	GO:0006310	GO:BP	DNA recombination	21100	2325	GO:0006259
query_1	FALSE	1	2559	32	7	0.21875	0.00273544	GO:0006357	GO:BP	regulation of transcription by RNA polymerase II	21100	2355	c("GO:0006355", "GO:0006366")
query_1	FALSE	1	3361	32	10	0.3125	0.0029753	GO:0010605	GO:BP	negative regulation of macromolecule metabolic process	21100	4751	c("GO:0009892", "GO:0043170", "GO:0060255")
query_1	FALSE	1	1104	32	1	0.03125	0.000905797	GO:0010608	GO:BP	post-transcriptional regulation of gene expression	21100	4754	GO:0010468
query_1	FALSE	1	1135	32	3	0.09375	0.00264317	GO:0010628	GO:BP	positive regulation of gene expression	21100	4773	c("GO:0010467", "GO:0010468", "GO:0010604")
query_1	FALSE	1	15	32	1	0.03125	0.0666667	GO:0033750	GO:BP	ribosome localization	21100	9616	GO:0051640
query_1	FALSE	1	879	32	2	0.0625	0.00227531	GO:0033993	GO:BP	response to lipid	21100	9631	GO:0010033
query_1	FALSE	1	921	32	2	0.0625	0.00217155	GO:0034097	GO:BP	response to cytokine	21100	9668	GO:0010033
query_1	FALSE	1	9	32	1	0.03125	0.111111	GO:0034214	GO:BP	protein hexamerization	21100	9770	GO:0051259
query_1	FALSE	1	1113	32	2	0.0625	0.00179695	GO:0034220	GO:BP	ion transmembrane transport	21100	9774	c("GO:0006811", "GO:0055085")
query_1	FALSE	1	449	32	1	0.03125	0.00222717	GO:0034248	GO:BP	regulation of cellular amide metabolic process	21100	9795	c("GO:0031323", "GO:0043603", "GO:0051171")
query_1	FALSE	1	105	32	1	0.03125	0.00952381	GO:0034308	GO:BP	primary alcohol metabolic process	21100	9835	GO:0006066
query_1	FALSE	1	424	32	1	0.03125	0.00235849	GO:0034329	GO:BP	cell junction assembly	21100	9844	c("GO:0022607", "GO:0034330")
query_1	FALSE	1	691	32	1	0.03125	0.00144718	GO:0034330	GO:BP	cell junction organization	21100	9845	GO:0016043
query_1	FALSE	1	21	32	1	0.03125	0.047619	GO:0034471	GO:BP	ncRNA 5'-end processing	21100	9937	c("GO:0000966", "GO:0034470")
query_1	FALSE	1	301	32	1	0.03125	0.00332226	GO:0034504	GO:BP	protein localization to nucleus	21100	9959	GO:0033365
query_1	FALSE	1	262	32	1	0.03125	0.00381679	GO:0034612	GO:BP	response to tumor necrosis factor	21100	9980	GO:0034097
query_1	FALSE	1	1913	32	4	0.125	0.00209096	GO:0034613	GO:BP	cellular protein localization	21100	9981	c("GO:0008104", "GO:0070727")
query_1	FALSE	1	78	32	1	0.03125	0.0128205	GO:0034637	GO:BP	cellular carbohydrate biosynthetic process	21100	9994	c("GO:0016051", "GO:0044249", "GO:0044262")
query_1	FALSE	1	8829	32	23	0.71875	0.00260505	GO:0034641	GO:BP	cellular nitrogen compound metabolic process	21100	9997	c("GO:0006807", "GO:0044237")
query_1	FALSE	1	1171	32	2	0.0625	0.00170794	GO:0034645	GO:BP	cellular macromolecule biosynthetic process	21100	10001	c("GO:0009059", "GO:0044249", "GO:0044260")
query_1	FALSE	1	3984	32	12	0.375	0.00301205	GO:0034654	GO:BP	nucleobase-containing compound biosynthetic process	21100	10006	c("GO:0006139", "GO:0018130", "GO:0019438", "GO:0044271", "GO:1901362")
query_1	FALSE	1	1054	32	3	0.09375	0.0028463	GO:0035295	GO:BP	tube development	21100	10287	c("GO:0007275", "GO:0048856")
query_1	FALSE	1	105	32	1	0.03125	0.00952381	GO:0035282	GO:BP	segmentation	21100	10274	GO:0003002
query_1	FALSE	1	151	32	2	0.0625	0.013245	GO:0035264	GO:BP	multicellular organism growth	21100	10262	c("GO:0032501", "GO:0048589")
query_1	FALSE	1	854	32	2	0.0625	0.00234192	GO:0035239	GO:BP	tube morphogenesis	21100	10253	c("GO:0009653", "GO:0035295")
query_1	FALSE	1	1	32	1	0.03125	1	GO:0035212	GO:BP	cell competition in a multicellular organism	21100	10230	c("GO:0007275", "GO:0009987", "GO:0040008")
query_1	FALSE	1	49	32	1	0.03125	0.0204082	GO:0035196	GO:BP	miRNA maturation	21100	10216	GO:0070918
query_1	FALSE	1	66	32	1	0.03125	0.0151515	GO:0033692	GO:BP	cellular polysaccharide biosynthetic process	21100	9611	c("GO:0000271", "GO:0034637", "GO:0034645", "GO:0044264")
query_1	FALSE	1	140	32	1	0.03125	0.00714286	GO:0035150	GO:BP	regulation of tube size	21100	10177	GO:0090066
query_1	FALSE	1	31	32	1	0.03125	0.0322581	GO:0035066	GO:BP	positive regulation of histone acetylation	21100	10109	c("GO:0016573", "GO:0031058", "GO:0035065", "GO:2000758")
query_1	FALSE	1	62	32	1	0.03125	0.016129	GO:0035065	GO:BP	regulation of histone acetylation	21100	10108	c("GO:0016573", "GO:0031056", "GO:2000756")
query_1	FALSE	1	137	32	1	0.03125	0.00729927	GO:0035051	GO:BP	cardiocyte differentiation	21100	10103	c("GO:0007507", "GO:0030154")
query_1	FALSE	1	487	32	1	0.03125	0.00205339	GO:0034765	GO:BP	regulation of ion transmembrane transport	21100	10041	c("GO:0034220", "GO:0034762", "GO:0043269")
query_1	FALSE	1	569	32	1	0.03125	0.00175747	GO:0034762	GO:BP	regulation of transmembrane transport	21100	10038	c("GO:0050794", "GO:0051049", "GO:0055085")
query_1	FALSE	1	138	32	1	0.03125	0.00724638	GO:0034754	GO:BP	cellular hormone metabolic process	21100	10030	c("GO:0042445", "GO:0044237")
query_1	FALSE	1	154	32	1	0.03125	0.00649351	GO:0035148	GO:BP	tube formation	21100	10175	c("GO:0035239", "GO:0048646")
query_1	FALSE	1	112	32	1	0.03125	0.00892857	GO:0033559	GO:BP	unsaturated fatty acid metabolic process	21100	9520	GO:0006631
query_1	FALSE	1	241	32	1	0.03125	0.00414938	GO:0033500	GO:BP	carbohydrate homeostasis	21100	9469	GO:0048878
query_1	FALSE	1	1109	32	2	0.0625	0.00180343	GO:0033365	GO:BP	protein localization to organelle	21100	9400	GO:0034613
query_1	FALSE	1	3600	32	12	0.375	0.00333333	GO:0032774	GO:BP	RNA biosynthetic process	21100	9017	c("GO:0009059", "GO:0016070", "GO:0034654")
query_1	FALSE	1	896	32	1	0.03125	0.00111607	GO:0032504	GO:BP	multicellular organism reproduction	21100	8805	c("GO:0000003", "GO:0032501")
query_1	FALSE	1	6317	32	10	0.3125	0.00158303	GO:0032502	GO:BP	developmental process	21100	8804	GO:0008150
query_1	FALSE	1	7354	32	11	0.34375	0.00149578	GO:0032501	GO:BP	multicellular organismal process	21100	8803	GO:0008150
query_1	FALSE	1	324	32	1	0.03125	0.00308642	GO:0032496	GO:BP	response to lipopolysaccharide	21100	8799	c("GO:0002237", "GO:0033993", "GO:1901700")
query_1	FALSE	1	907	32	3	0.09375	0.00330761	GO:0032446	GO:BP	protein modification by small protein conjugation	21100	8760	GO:0070647
query_1	FALSE	1	597	32	2	0.0625	0.00335008	GO:0032787	GO:BP	monocarboxylic acid metabolic process	21100	9026	GO:0019752
query_1	FALSE	1	1406	32	1	0.03125	0.000711238	GO:0032270	GO:BP	positive regulation of cellular protein metabolic process	21100	8642	c("GO:0031325", "GO:0032268", "GO:0044267", "GO:0051247")
query_1	FALSE	1	2370	32	3	0.09375	0.00126582	GO:0032268	GO:BP	regulation of cellular protein metabolic process	21100	8640	c("GO:0031323", "GO:0044267", "GO:0051246")
query_1	FALSE	1	384	32	2	0.0625	0.00520833	GO:0032259	GO:BP	methylation	21100	8633	GO:0008152
query_1	FALSE	1	37	32	1	0.03125	0.027027	GO:0032094	GO:BP	response to food	21100	8532	c("GO:0031667", "GO:0042221")
query_1	FALSE	1	458	32	2	0.0625	0.00436681	GO:0031667	GO:BP	response to nutrient levels	21100	8430	GO:0009991
query_1	FALSE	1	301	32	2	0.0625	0.00664452	GO:0031647	GO:BP	regulation of protein stability	21100	8411	GO:0065008
query_1	FALSE	1	161	32	1	0.03125	0.00621118	GO:0031503	GO:BP	protein-containing complex localization	21100	8335	GO:0051179
query_1	FALSE	1	970	32	2	0.0625	0.00206186	GO:0032269	GO:BP	negative regulation of cellular protein metabolic process	21100	8641	c("GO:0031324", "GO:0032268", "GO:0044267", "GO:0051248")
query_1	FALSE	1	139	32	1	0.03125	0.00719424	GO:0035296	GO:BP	regulation of tube diameter	21100	10288	GO:0035150
query_1	FALSE	1	253	32	1	0.03125	0.00395257	GO:0032868	GO:BP	response to insulin	21100	9070	GO:0043434
query_1	FALSE	1	582	32	2	0.0625	0.00343643	GO:0032870	GO:BP	cellular response to hormone stimulus	21100	9072	c("GO:0009725", "GO:0071310", "GO:0071495")
query_1	FALSE	1	86	32	1	0.03125	0.0116279	GO:0033273	GO:BP	response to vitamin	21100	9331	GO:0007584
query_1	FALSE	1	19	32	1	0.03125	0.0526316	GO:0033189	GO:BP	response to vitamin A	21100	9290	c("GO:0033273", "GO:0033993")
query_1	FALSE	1	18	32	1	0.03125	0.0555556	GO:0033151	GO:BP	V(D)J recombination	21100	9276	GO:0002562
query_1	FALSE	1	35	32	2	0.0625	0.0571429	GO:0033120	GO:BP	positive regulation of RNA splicing	21100	9251	c("GO:0008380", "GO:0010628", "GO:0043484", "GO:0051254")
query_1	FALSE	1	26	32	1	0.03125	0.0384615	GO:0033119	GO:BP	negative regulation of RNA splicing	21100	9250	c("GO:0008380", "GO:0010629", "GO:0043484", "GO:0051253")
query_1	FALSE	1	1137	32	2	0.0625	0.00175901	GO:0033043	GO:BP	regulation of organelle organization	21100	9205	c("GO:0006996", "GO:0051128")
query_1	FALSE	1	199	32	1	0.03125	0.00502513	GO:0032869	GO:BP	cellular response to insulin stimulus	21100	9071	c("GO:0032868", "GO:0071375")
query_1	FALSE	1	3125	32	5	0.15625	0.0016	GO:0033036	GO:BP	macromolecule localization	21100	9203	GO:0051179
query_1	FALSE	1	786	32	3	0.09375	0.00381679	GO:0032940	GO:BP	secretion by cell	21100	9132	c("GO:0046903", "GO:0140352")
query_1	FALSE	1	69	32	1	0.03125	0.0144928	GO:0032922	GO:BP	circadian regulation of gene expression	21100	9119	c("GO:0007623", "GO:0010468", "GO:0032501")
query_1	FALSE	1	72	32	1	0.03125	0.0138889	GO:0032890	GO:BP	regulation of organic acid transport	21100	9092	c("GO:0015849", "GO:0051049")
query_1	FALSE	1	256	32	2	0.0625	0.0078125	GO:0032886	GO:BP	regulation of microtubule-based process	21100	9088	c("GO:0007017", "GO:0050794")
query_1	FALSE	1	845	32	1	0.03125	0.00118343	GO:0032880	GO:BP	regulation of protein localization	21100	9082	c("GO:0008104", "GO:0032879")
query_1	FALSE	1	2725	32	1	0.03125	0.000366972	GO:0032879	GO:BP	regulation of localization	21100	9081	c("GO:0050789", "GO:0051179")
query_1	FALSE	1	67	32	2	0.0625	0.0298507	GO:0033013	GO:BP	tetrapyrrole metabolic process	21100	9185	c("GO:0006725", "GO:0046483", "GO:1901360", "GO:1901564")
query_1	FALSE	1	999	32	1	0.03125	0.001001	GO:0031401	GO:BP	positive regulation of protein modification process	21100	8299	c("GO:0006464", "GO:0031399", "GO:0032270")
query_1	FALSE	1	6	32	1	0.03125	0.166667	GO:0035405	GO:BP	histone-threonine phosphorylation	21100	10365	c("GO:0016572", "GO:0018107")
query_1	FALSE	1	34	32	1	0.03125	0.0294118	GO:0035520	GO:BP	monoubiquitinated protein deubiquitination	21100	10441	GO:0016579
query_1	FALSE	1	4	32	1	0.03125	0.25	GO:0042904	GO:BP	9-cis-retinoic acid biosynthetic process	21100	12030	c("GO:0002138", "GO:0042905")
query_1	FALSE	1	4	32	1	0.03125	0.25	GO:0042905	GO:BP	9-cis-retinoic acid metabolic process	21100	12031	GO:0042573
query_1	FALSE	1	39	32	1	0.03125	0.025641	GO:0042908	GO:BP	xenobiotic transport	21100	12033	GO:0006810
query_1	FALSE	1	1419	32	1	0.03125	0.000704722	GO:0042981	GO:BP	regulation of apoptotic process	21100	12064	c("GO:0006915", "GO:0043067")
query_1	FALSE	1	653	32	1	0.03125	0.00153139	GO:0043009	GO:BP	chordate embryonic development	21100	12088	GO:0009792
query_1	FALSE	1	335	32	1	0.03125	0.00298507	GO:0043010	GO:BP	camera-type eye development	21100	12089	GO:0001654
query_1	FALSE	1	48	32	1	0.03125	0.0208333	GO:0043038	GO:BP	amino acid activation	21100	12097	GO:0006520
query_1	FALSE	1	47	32	1	0.03125	0.0212766	GO:0043039	GO:BP	tRNA aminoacylation	21100	12098	c("GO:0006399", "GO:0043038")
query_1	FALSE	1	736	32	2	0.0625	0.00271739	GO:0043043	GO:BP	peptide biosynthetic process	21100	12102	c("GO:0006518", "GO:0043604", "GO:1901566")
query_1	FALSE	1	869	32	1	0.03125	0.00115075	GO:0043066	GO:BP	negative regulation of apoptotic process	21100	12123	c("GO:0006915", "GO:0042981", "GO:0043069")
query_1	FALSE	1	1448	32	1	0.03125	0.000690608	GO:0043067	GO:BP	regulation of programmed cell death	21100	12124	c("GO:0010941", "GO:0012501")
query_1	FALSE	1	887	32	1	0.03125	0.0011274	GO:0043069	GO:BP	negative regulation of programmed cell death	21100	12126	c("GO:0012501", "GO:0043067", "GO:0060548")
query_1	FALSE	1	29	32	1	0.03125	0.0344828	GO:0043153	GO:BP	entrainment of circadian clock by photoperiod	21100	12173	c("GO:0009648", "GO:0009649")
query_1	FALSE	1	12360	32	21	0.65625	0.00169903	GO:0043170	GO:BP	macromolecule metabolic process	21100	12184	GO:0071704
query_1	FALSE	1	1509	32	1	0.03125	0.000662691	GO:0043207	GO:BP	response to external biotic stimulus	21100	12195	c("GO:0009605", "GO:0009607")
query_1	FALSE	1	96	32	1	0.03125	0.0104167	GO:0043255	GO:BP	regulation of carbohydrate biosynthetic process	21100	12208	c("GO:0006109", "GO:0009889", "GO:0016051")
query_1	FALSE	1	681	32	1	0.03125	0.00146843	GO:0043269	GO:BP	regulation of ion transport	21100	12212	c("GO:0006811", "GO:0051049")
query_1	FALSE	1	73	32	1	0.03125	0.0136986	GO:0043966	GO:BP	histone H3 acetylation	21100	12538	GO:0016573
query_1	FALSE	1	3395	32	1	0.03125	0.000294551	GO:0043933	GO:BP	protein-containing complex organization	21100	12512	GO:0016043
query_1	FALSE	1	867	32	2	0.0625	0.00230681	GO:0043604	GO:BP	amide biosynthetic process	21100	12433	c("GO:0043603", "GO:0044271")
query_1	FALSE	1	1167	32	4	0.125	0.00342759	GO:0043603	GO:BP	cellular amide metabolic process	21100	12432	GO:0034641
query_1	FALSE	1	261	32	2	0.0625	0.00766284	GO:0043543	GO:BP	protein acylation	21100	12393	GO:0006464
query_1	FALSE	1	294	32	2	0.0625	0.00680272	GO:0042886	GO:BP	amide transport	21100	12022	GO:0071705
query_1	FALSE	1	157	32	3	0.09375	0.0191083	GO:0043484	GO:BP	regulation of RNA splicing	21100	12359	c("GO:0008380", "GO:0010468", "GO:0051252")
query_1	FALSE	1	2	32	1	0.03125	0.5	GO:0043449	GO:BP	cellular alkene metabolic process	21100	12325	c("GO:0044237", "GO:1900673")
query_1	FALSE	1	966	32	4	0.125	0.00414079	GO:0043436	GO:BP	oxoacid metabolic process	21100	12315	GO:0006082
query_1	FALSE	1	398	32	1	0.03125	0.00251256	GO:0043434	GO:BP	response to peptide hormone	21100	12313	c("GO:0009725", "GO:1901652")
query_1	FALSE	1	333	32	2	0.0625	0.00600601	GO:0043414	GO:BP	macromolecule methylation	21100	12303	c("GO:0032259", "GO:0043412", "GO:0044260")
query_1	FALSE	1	3936	32	8	0.25	0.00203252	GO:0043412	GO:BP	macromolecule modification	21100	12301	GO:0043170
query_1	FALSE	1	52	32	1	0.03125	0.0192308	GO:0043392	GO:BP	negative regulation of DNA binding	21100	12287	c("GO:0051100", "GO:0051101")
query_1	FALSE	1	71	32	1	0.03125	0.0140845	GO:0043462	GO:BP	regulation of ATP-dependent activity	21100	12338	GO:0065009
query_1	FALSE	1	28	32	1	0.03125	0.0357143	GO:0042759	GO:BP	long-chain fatty acid biosynthetic process	21100	11935	c("GO:0001676", "GO:0006633")
query_1	FALSE	1	15	32	1	0.03125	0.0666667	GO:0042754	GO:BP	negative regulation of circadian rhythm	21100	11931	c("GO:0007623", "GO:0042752", "GO:0048519")
query_1	FALSE	1	119	32	1	0.03125	0.00840336	GO:0042752	GO:BP	regulation of circadian rhythm	21100	11929	c("GO:0007623", "GO:0050789")
query_1	FALSE	1	504	32	1	0.03125	0.00198413	GO:0042110	GO:BP	T cell activation	21100	11538	GO:0046649
query_1	FALSE	1	21	32	1	0.03125	0.047619	GO:0042026	GO:BP	protein refolding	21100	11493	GO:0006457
query_1	FALSE	1	665	32	2	0.0625	0.00300752	GO:0040008	GO:BP	regulation of growth	21100	11455	c("GO:0040007", "GO:0050789")
query_1	FALSE	1	959	32	4	0.125	0.00417101	GO:0040007	GO:BP	growth	21100	11454	GO:0008150
query_1	FALSE	1	27	32	1	0.03125	0.037037	GO:0036296	GO:BP	response to increased oxygen levels	21100	10998	GO:0070482
query_1	FALSE	1	315	32	1	0.03125	0.0031746	GO:0036293	GO:BP	response to decreased oxygen levels	21100	10995	GO:0070482
query_1	FALSE	1	337	32	1	0.03125	0.00296736	GO:0042113	GO:BP	B cell activation	21100	11539	GO:0046649
query_1	FALSE	1	7	32	1	0.03125	0.142857	GO:0036265	GO:BP	RNA (guanine-N7)-methylation	21100	10972	GO:0001510
query_1	FALSE	1	23	32	1	0.03125	0.0434783	GO:0035902	GO:BP	response to immobilization stress	21100	10723	GO:0006950
query_1	FALSE	1	132	32	2	0.0625	0.0151515	GO:0035601	GO:BP	protein deacylation	21100	10493	c("GO:0006464", "GO:0098732")
query_1	FALSE	1	340	32	2	0.0625	0.00588235	GO:0035592	GO:BP	establishment of protein localization to extracellular region	21100	10490	c("GO:0045184", "GO:0071692")
query_1	FALSE	1	2629	32	1	0.03125	0.000380373	GO:0035556	GO:BP	intracellular signal transduction	21100	10463	GO:0007165
query_1	FALSE	1	29	32	1	0.03125	0.0344828	GO:0035522	GO:BP	monoubiquitinated histone H2A deubiquitination	21100	10443	GO:0035521
query_1	FALSE	1	29	32	1	0.03125	0.0344828	GO:0035521	GO:BP	monoubiquitinated histone deubiquitination	21100	10442	c("GO:0016578", "GO:0035520")
query_1	FALSE	1	3719	32	5	0.15625	0.00134445	GO:0036211	GO:BP	protein modification process	21100	10936	c("GO:0019538", "GO:0043412")
query_1	FALSE	1	19	32	1	0.03125	0.0526316	GO:0035461	GO:BP	vitamin transmembrane transport	21100	10402	c("GO:0051180", "GO:0055085")
query_1	FALSE	1	1658	32	2	0.0625	0.00120627	GO:0042127	GO:BP	regulation of cell population proliferation	21100	11549	c("GO:0008283", "GO:0050794")
query_1	FALSE	1	126	32	1	0.03125	0.00793651	GO:0042177	GO:BP	negative regulation of protein catabolic process	21100	11577	c("GO:0009895", "GO:0030163", "GO:0042176", "GO:0051248")
query_1	FALSE	1	53	32	1	0.03125	0.0188679	GO:0042743	GO:BP	hydrogen peroxide metabolic process	21100	11920	GO:0072593
query_1	FALSE	1	362	32	1	0.03125	0.00276243	GO:0042692	GO:BP	muscle cell differentiation	21100	11884	c("GO:0030154", "GO:0061061")
query_1	FALSE	1	240	32	1	0.03125	0.00416667	GO:0042593	GO:BP	glucose homeostasis	21100	11833	GO:0033500
query_1	FALSE	1	1658	32	3	0.09375	0.00180941	GO:0042592	GO:BP	homeostatic process	21100	11832	GO:0065008
query_1	FALSE	1	34	32	1	0.03125	0.0294118	GO:0042573	GO:BP	retinoic acid metabolic process	21100	11829	c("GO:0001523", "GO:0032787", "GO:0034754")
query_1	FALSE	1	52	32	1	0.03125	0.0192308	GO:0042572	GO:BP	retinol metabolic process	21100	11828	c("GO:0001523", "GO:0034308", "GO:0034754", "GO:0120254")
query_1	FALSE	1	404	32	1	0.03125	0.00247525	GO:0042176	GO:BP	regulation of protein catabolic process	21100	11576	c("GO:0009894", "GO:0030163", "GO:0051246")
query_1	FALSE	1	33	32	1	0.03125	0.030303	GO:0042558	GO:BP	pteridine-containing compound metabolic process	21100	11825	c("GO:0006725", "GO:0046483", "GO:1901360", "GO:1901564")
query_1	FALSE	1	20	32	1	0.03125	0.05	GO:0042359	GO:BP	vitamin D metabolic process	21100	11694	c("GO:0006775", "GO:0008202", "GO:1901615")
query_1	FALSE	1	81	32	1	0.03125	0.0123457	GO:0042310	GO:BP	vasoconstriction	21100	11658	GO:0097746
query_1	FALSE	1	72	32	1	0.03125	0.0138889	GO:0042273	GO:BP	ribosomal large subunit biogenesis	21100	11645	c("GO:0022613", "GO:0042254")
query_1	FALSE	1	61	32	1	0.03125	0.0163934	GO:0042255	GO:BP	ribosome assembly	21100	11633	c("GO:0042254", "GO:0140694")
query_1	FALSE	1	4336	32	6	0.1875	0.00138376	GO:0042221	GO:BP	response to chemical	21100	11621	GO:0050896
query_1	FALSE	1	24	32	1	0.03125	0.0416667	GO:0042178	GO:BP	xenobiotic catabolic process	21100	11578	c("GO:0006805", "GO:0044248")
query_1	FALSE	1	232	32	1	0.03125	0.00431034	GO:0042445	GO:BP	hormone metabolic process	21100	11762	c("GO:0008152", "GO:0010817")
query_1	FALSE	1	8	32	1	0.03125	0.125	GO:0043983	GO:BP	histone H4-K12 acetylation	21100	12555	GO:0043967
query_1	FALSE	1	500	32	2	0.0625	0.004	GO:0031400	GO:BP	negative regulation of protein modification process	21100	8298	c("GO:0006464", "GO:0031399", "GO:0032269")
query_1	FALSE	1	83	32	2	0.0625	0.0240964	GO:0031397	GO:BP	negative regulation of protein ubiquitination	21100	8295	c("GO:0016567", "GO:0031396", "GO:1903321")
query_1	FALSE	1	490	32	1	0.03125	0.00204082	GO:0016049	GO:BP	cell growth	21100	5649	c("GO:0009987", "GO:0040007")
query_1	FALSE	1	204	32	2	0.0625	0.00980392	GO:0016051	GO:BP	carbohydrate biosynthetic process	21100	5651	c("GO:0005975", "GO:1901576")
query_1	FALSE	1	308	32	2	0.0625	0.00649351	GO:0016053	GO:BP	organic acid biosynthetic process	21100	5653	c("GO:0006082", "GO:0044249", "GO:0044283", "GO:1901576")
query_1	FALSE	1	6983	32	20	0.625	0.0028641	GO:0016070	GO:BP	RNA metabolic process	21100	5667	GO:0090304
query_1	FALSE	1	2179	32	4	0.125	0.0018357	GO:0016071	GO:BP	mRNA metabolic process	21100	5668	GO:0016070
query_1	FALSE	1	264	32	4	0.125	0.0151515	GO:0016072	GO:BP	rRNA metabolic process	21100	5669	GO:0034660
query_1	FALSE	1	89	32	1	0.03125	0.011236	GO:0016101	GO:BP	diterpenoid metabolic process	21100	5690	GO:0006721
query_1	FALSE	1	11	32	1	0.03125	0.0909091	GO:0016102	GO:BP	diterpenoid biosynthetic process	21100	5691	c("GO:0016101", "GO:0016114")
query_1	FALSE	1	17	32	1	0.03125	0.0588235	GO:0016114	GO:BP	terpenoid biosynthetic process	21100	5703	c("GO:0006721", "GO:0008299")
query_1	FALSE	1	1604	32	2	0.0625	0.00124688	GO:0016192	GO:BP	vesicle-mediated transport	21100	5742	GO:0006810
query_1	FALSE	1	28	32	1	0.03125	0.0357143	GO:0016226	GO:BP	iron-sulfur cluster assembly	21100	5751	c("GO:0006790", "GO:0031163")
query_1	FALSE	1	1882	32	1	0.03125	0.00053135	GO:0016310	GO:BP	phosphorylation	21100	5776	GO:0006796
query_1	FALSE	1	155	32	1	0.03125	0.00645161	GO:0016331	GO:BP	morphogenesis of embryonic epithelium	21100	5785	c("GO:0002009", "GO:0048598")
query_1	FALSE	1	69	32	1	0.03125	0.0144928	GO:0016444	GO:BP	somatic cell DNA recombination	21100	5808	GO:0006310
query_1	FALSE	1	849	32	3	0.09375	0.00353357	GO:0016567	GO:BP	protein ubiquitination	21100	5844	GO:0032446
query_1	FALSE	1	505	32	3	0.09375	0.00594059	GO:0016570	GO:BP	histone modification	21100	5846	GO:0006464
query_1	FALSE	1	44	32	1	0.03125	0.0227273	GO:0016572	GO:BP	histone phosphorylation	21100	5848	c("GO:0006468", "GO:0016570")
query_1	FALSE	1	4	32	1	0.03125	0.25	GO:0018335	GO:BP	protein succinylation	21100	6206	GO:0043543
query_1	FALSE	1	123	32	1	0.03125	0.00813008	GO:0018210	GO:BP	peptidyl-threonine modification	21100	6090	GO:0018193
query_1	FALSE	1	13	32	1	0.03125	0.0769231	GO:0018206	GO:BP	peptidyl-methionine modification	21100	6086	GO:0018193
query_1	FALSE	1	403	32	1	0.03125	0.00248139	GO:0018205	GO:BP	peptidyl-lysine modification	21100	6085	GO:0018193
query_1	FALSE	1	1285	32	3	0.09375	0.00233463	GO:0018193	GO:BP	peptidyl-amino acid modification	21100	6073	GO:0006464
query_1	FALSE	1	4057	32	12	0.375	0.00295785	GO:0018130	GO:BP	heterocycle biosynthetic process	21100	6014	c("GO:0044249", "GO:0046483")
query_1	FALSE	1	7868	32	6	0.1875	0.000762583	GO:0016043	GO:BP	cellular component organization	21100	5645	GO:0071840
query_1	FALSE	1	114	32	1	0.03125	0.00877193	GO:0018107	GO:BP	peptidyl-threonine phosphorylation	21100	6000	c("GO:0006468", "GO:0018210")
query_1	FALSE	1	1	32	1	0.03125	1	GO:0017143	GO:BP	insecticide metabolic process	21100	5889	c("GO:0006805", "GO:0009404", "GO:0017085")
query_1	FALSE	1	6	32	1	0.03125	0.166667	GO:0017085	GO:BP	response to insecticide	21100	5883	GO:0009636
query_1	FALSE	1	185	32	1	0.03125	0.00540541	GO:0016579	GO:BP	protein deubiquitination	21100	5855	GO:0070646
query_1	FALSE	1	40	32	1	0.03125	0.025	GO:0016578	GO:BP	histone deubiquitination	21100	5854	c("GO:0016570", "GO:0016579")
query_1	FALSE	1	102	32	2	0.0625	0.0196078	GO:0016575	GO:BP	histone deacetylation	21100	5851	c("GO:0006476", "GO:0016570")
query_1	FALSE	1	172	32	1	0.03125	0.00581395	GO:0016573	GO:BP	histone acetylation	21100	5849	c("GO:0016570", "GO:0018393")
query_1	FALSE	1	7	32	1	0.03125	0.142857	GO:0017196	GO:BP	N-terminal peptidyl-methionine acetylation	21100	5910	c("GO:0006474", "GO:0018206")
query_1	FALSE	1	328	32	1	0.03125	0.00304878	GO:0015980	GO:BP	energy derivation by oxidation of organic compounds	21100	5622	GO:0006091
query_1	FALSE	1	226	32	1	0.03125	0.00442478	GO:0015931	GO:BP	nucleobase-containing compound transport	21100	5578	c("GO:0071702", "GO:0071705")
query_1	FALSE	1	9	32	1	0.03125	0.111111	GO:0015884	GO:BP	folic acid transport	21100	5545	c("GO:0006835", "GO:0015849", "GO:0042886", "GO:0051180", "GO:0072337")
query_1	FALSE	1	305	32	2	0.0625	0.00655738	GO:0010948	GO:BP	negative regulation of cell cycle process	21100	5067	c("GO:0010564", "GO:0022402", "GO:0045786")
query_1	FALSE	1	1592	32	1	0.03125	0.000628141	GO:0010941	GO:BP	regulation of cell death	21100	5062	c("GO:0008219", "GO:0050794")
query_1	FALSE	1	39	32	1	0.03125	0.025641	GO:0010907	GO:BP	positive regulation of glucose metabolic process	21100	5028	c("GO:0006006", "GO:0010676", "GO:0010906", "GO:0062013")
query_1	FALSE	1	118	32	1	0.03125	0.00847458	GO:0010906	GO:BP	regulation of glucose metabolic process	21100	5027	c("GO:0006006", "GO:0010675", "GO:0062012")
query_1	FALSE	1	47	32	2	0.0625	0.0425532	GO:0010824	GO:BP	regulation of centrosome duplication	21100	4958	c("GO:0046605", "GO:0051298")
query_1	FALSE	1	502	32	2	0.0625	0.00398406	GO:0010817	GO:BP	regulation of hormone levels	21100	4951	GO:0065008
query_1	FALSE	1	15	32	1	0.03125	0.0666667	GO:0010958	GO:BP	regulation of amino acid import across plasma membrane	21100	5076	c("GO:0089718", "GO:1903789")
query_1	FALSE	1	296	32	1	0.03125	0.00337838	GO:0010720	GO:BP	positive regulation of cell development	21100	4860	c("GO:0045597", "GO:0048468", "GO:0060284")
query_1	FALSE	1	148	32	1	0.03125	0.00675676	GO:0010675	GO:BP	regulation of cellular carbohydrate metabolic process	21100	4819	c("GO:0006109", "GO:0031323", "GO:0044262")
query_1	FALSE	1	1351	32	1	0.03125	0.000740192	GO:0010648	GO:BP	negative regulation of cell communication	21100	4793	c("GO:0007154", "GO:0010646", "GO:0048523")
query_1	FALSE	1	1711	32	1	0.03125	0.000584454	GO:0010647	GO:BP	positive regulation of cell communication	21100	4792	c("GO:0007154", "GO:0010646", "GO:0048522")
query_1	FALSE	1	3336	32	5	0.15625	0.0014988	GO:0010646	GO:BP	regulation of cell communication	21100	4791	c("GO:0007154", "GO:0050794")
query_1	FALSE	1	352	32	2	0.0625	0.00568182	GO:0010639	GO:BP	negative regulation of organelle organization	21100	4784	c("GO:0006996", "GO:0033043", "GO:0051129")
query_1	FALSE	1	1579	32	2	0.0625	0.00126662	GO:0010629	GO:BP	negative regulation of gene expression	21100	4774	c("GO:0010467", "GO:0010468", "GO:0010605")
query_1	FALSE	1	53	32	1	0.03125	0.0188679	GO:0010676	GO:BP	positive regulation of cellular carbohydrate metabolic process	21100	4820	c("GO:0010675", "GO:0031325", "GO:0044262", "GO:0045913")
query_1	FALSE	1	177	32	1	0.03125	0.00564972	GO:0018393	GO:BP	internal peptidyl-lysine acetylation	21100	6243	c("GO:0006475", "GO:0018394")
query_1	FALSE	1	431	32	1	0.03125	0.00232019	GO:0010975	GO:BP	regulation of neuron projection development	21100	5092	c("GO:0031175", "GO:0120035")
query_1	FALSE	1	1918	32	1	0.03125	0.000521376	GO:0012501	GO:BP	programmed cell death	21100	5116	GO:0008219
query_1	FALSE	1	29	32	1	0.03125	0.0344828	GO:0015868	GO:BP	purine ribonucleotide transport	21100	5530	c("GO:0015865", "GO:1901264")
query_1	FALSE	1	30	32	1	0.03125	0.0333333	GO:0015865	GO:BP	purine nucleotide transport	21100	5527	GO:0006862
query_1	FALSE	1	323	32	2	0.0625	0.00619195	GO:0015849	GO:BP	organic acid transport	21100	5512	GO:0071702
query_1	FALSE	1	101	32	1	0.03125	0.00990099	GO:0015837	GO:BP	amine transport	21100	5501	c("GO:0071702", "GO:0071705")
query_1	FALSE	1	254	32	1	0.03125	0.00393701	GO:0015833	GO:BP	peptide transport	21100	5497	c("GO:0042886", "GO:0071702")
query_1	FALSE	1	29	32	1	0.03125	0.0344828	GO:0015813	GO:BP	L-glutamate transmembrane transport	21100	5479	c("GO:0051938", "GO:0098656", "GO:1902475")
query_1	FALSE	1	135	32	1	0.03125	0.00740741	GO:0010977	GO:BP	negative regulation of neuron projection development	21100	5094	c("GO:0010975", "GO:0031175", "GO:0031345")
query_1	FALSE	1	68	32	1	0.03125	0.0147059	GO:0015807	GO:BP	L-amino acid transport	21100	5474	c("GO:0046942", "GO:0071705")
query_1	FALSE	1	146	32	1	0.03125	0.00684932	GO:0015748	GO:BP	organophosphate ester transport	21100	5420	GO:0071702
query_1	FALSE	1	363	32	2	0.0625	0.00550964	GO:0015711	GO:BP	organic anion transport	21100	5384	c("GO:0006820", "GO:0071702")
query_1	FALSE	1	1778	32	4	0.125	0.00224972	GO:0015031	GO:BP	protein transport	21100	5347	c("GO:0045184", "GO:0071702", "GO:0071705")
query_1	FALSE	1	230	32	1	0.03125	0.00434783	GO:0014706	GO:BP	striated muscle tissue development	21100	5191	GO:0060537
query_1	FALSE	1	901	32	2	0.0625	0.00221976	GO:0014070	GO:BP	response to organic cyclic compound	21100	5183	GO:0010033
query_1	FALSE	1	99	32	1	0.03125	0.010101	GO:0014020	GO:BP	primary neural tube formation	21100	5137	c("GO:0001838", "GO:0001841")
query_1	FALSE	1	63	32	1	0.03125	0.015873	GO:0015800	GO:BP	acidic amino acid transport	21100	5467	GO:0006865
query_1	FALSE	1	1527	32	3	0.09375	0.00196464	GO:0031399	GO:BP	regulation of protein modification process	21100	8297	c("GO:0006464", "GO:0032268")
query_1	FALSE	1	188	32	1	0.03125	0.00531915	GO:0018394	GO:BP	peptidyl-lysine acetylation	21100	6244	c("GO:0006473", "GO:0018205")
query_1	FALSE	1	4048	32	14	0.4375	0.0034585	GO:0019219	GO:BP	regulation of nucleobase-containing compound metabolic process	21100	6471	c("GO:0006139", "GO:0031323", "GO:0051171", "GO:0080090")
query_1	FALSE	1	996	32	1	0.03125	0.00100402	GO:0030163	GO:BP	protein catabolic process	21100	7720	c("GO:0009057", "GO:0019538", "GO:1901565")
query_1	FALSE	1	1366	32	1	0.03125	0.000732064	GO:0030182	GO:BP	neuron differentiation	21100	7730	c("GO:0030154", "GO:0048699")
query_1	FALSE	1	147	32	1	0.03125	0.00680272	GO:0030183	GO:BP	B cell differentiation	21100	7731	c("GO:0030098", "GO:0042113")
query_1	FALSE	1	267	32	1	0.03125	0.00374532	GO:0030217	GO:BP	T cell differentiation	21100	7756	c("GO:0030098", "GO:0042110")
query_1	FALSE	1	216	32	1	0.03125	0.00462963	GO:0030258	GO:BP	lipid modification	21100	7778	GO:0044255
query_1	FALSE	1	41	32	1	0.03125	0.0243902	GO:0030488	GO:BP	tRNA methylation	21100	7868	c("GO:0001510", "GO:0006400")
query_1	FALSE	1	670	32	1	0.03125	0.00149254	GO:0030855	GO:BP	epithelial cell differentiation	21100	8026	c("GO:0030154", "GO:0060429")
query_1	FALSE	1	384	32	1	0.03125	0.00260417	GO:0030900	GO:BP	forebrain development	21100	8044	c("GO:0007420", "GO:0048856")
query_1	FALSE	1	93	32	1	0.03125	0.0107527	GO:0030901	GO:BP	midbrain development	21100	8045	c("GO:0007420", "GO:0048856")
query_1	FALSE	1	155	32	1	0.03125	0.00645161	GO:0030902	GO:BP	hindbrain development	21100	8046	c("GO:0007420", "GO:0048856")
query_1	FALSE	1	145	32	2	0.0625	0.0137931	GO:0031023	GO:BP	microtubule organizing center organization	21100	8101	c("GO:0000226", "GO:0007017", "GO:0016043")
query_1	FALSE	1	682	32	1	0.03125	0.00146628	GO:0031047	GO:BP	gene silencing by RNA	21100	8119	GO:0010629
query_1	FALSE	1	13	32	1	0.03125	0.0769231	GO:0031053	GO:BP	primary miRNA processing	21100	8124	c("GO:0034470", "GO:0035196")
query_1	FALSE	1	181	32	1	0.03125	0.00552486	GO:0031056	GO:BP	regulation of histone modification	21100	8127	c("GO:0016570", "GO:0031399")
query_1	FALSE	1	106	32	1	0.03125	0.00943396	GO:0031058	GO:BP	positive regulation of histone modification	21100	8129	c("GO:0016570", "GO:0031056", "GO:0031401")
query_1	FALSE	1	45	32	1	0.03125	0.0222222	GO:0031063	GO:BP	regulation of histone deacetylation	21100	8134	c("GO:0016575", "GO:0031056", "GO:0090311")
query_1	FALSE	1	28	32	1	0.03125	0.0357143	GO:0031163	GO:BP	metallo-sulfur cluster assembly	21100	8205	GO:0022607
query_1	FALSE	1	213	32	2	0.0625	0.00938967	GO:0031396	GO:BP	regulation of protein ubiquitination	21100	8294	c("GO:0016567", "GO:1903320")
query_1	FALSE	1	30	32	1	0.03125	0.0333333	GO:0031365	GO:BP	N-terminal protein amino acid modification	21100	8283	GO:0006464
query_1	FALSE	1	340	32	1	0.03125	0.00294118	GO:0031346	GO:BP	positive regulation of cell projection organization	21100	8277	c("GO:0030030", "GO:0031344", "GO:0051130")
query_1	FALSE	1	183	32	1	0.03125	0.00546448	GO:0031345	GO:BP	negative regulation of cell projection organization	21100	8276	c("GO:0030030", "GO:0031344", "GO:0051129")
query_1	FALSE	1	635	32	2	0.0625	0.00314961	GO:0031344	GO:BP	regulation of cell projection organization	21100	8275	c("GO:0030030", "GO:0051128")
query_1	FALSE	1	267	32	1	0.03125	0.00374532	GO:0031330	GO:BP	negative regulation of cellular catabolic process	21100	8262	c("GO:0009895", "GO:0031324", "GO:0031329", "GO:0044248")
query_1	FALSE	1	4160	32	8	0.25	0.00192308	GO:0030154	GO:BP	cell differentiation	21100	7716	GO:0048869
query_1	FALSE	1	871	32	1	0.03125	0.00114811	GO:0031329	GO:BP	regulation of cellular catabolic process	21100	8261	c("GO:0009894", "GO:0031323", "GO:0044248")
query_1	FALSE	1	1566	32	7	0.21875	0.00446999	GO:0031327	GO:BP	negative regulation of cellular biosynthetic process	21100	8259	c("GO:0009890", "GO:0031324", "GO:0031326", "GO:0044249")
query_1	FALSE	1	4085	32	12	0.375	0.00293758	GO:0031326	GO:BP	regulation of cellular biosynthetic process	21100	8258	c("GO:0009889", "GO:0031323", "GO:0044249")
query_1	FALSE	1	3271	32	8	0.25	0.00244574	GO:0031325	GO:BP	positive regulation of cellular metabolic process	21100	8257	c("GO:0009893", "GO:0031323", "GO:0044237", "GO:0048522")
query_1	FALSE	1	2506	32	9	0.28125	0.00359138	GO:0031324	GO:BP	negative regulation of cellular metabolic process	21100	8256	c("GO:0009892", "GO:0031323", "GO:0044237", "GO:0048523")
query_1	FALSE	1	6004	32	14	0.4375	0.00233178	GO:0031323	GO:BP	regulation of cellular metabolic process	21100	8255	c("GO:0019222", "GO:0044237", "GO:0050794")
query_1	FALSE	1	957	32	1	0.03125	0.00104493	GO:0031175	GO:BP	neuron projection development	21100	8213	c("GO:0048666", "GO:0120036")
query_1	FALSE	1	1964	32	6	0.1875	0.00305499	GO:0031328	GO:BP	positive regulation of cellular biosynthetic process	21100	8260	c("GO:0009891", "GO:0031325", "GO:0031326", "GO:0044249")
query_1	FALSE	1	391	32	2	0.0625	0.00511509	GO:0030098	GO:BP	lymphocyte differentiation	21100	7701	c("GO:0046649", "GO:1903131")
query_1	FALSE	1	899	32	3	0.09375	0.00333704	GO:0030097	GO:BP	hemopoiesis	21100	7700	GO:0048534
query_1	FALSE	1	181	32	1	0.03125	0.00552486	GO:0030073	GO:BP	insulin secretion	21100	7697	c("GO:0009306", "GO:0030072")
query_1	FALSE	1	940	32	4	0.125	0.00425532	GO:0019752	GO:BP	carboxylic acid metabolic process	21100	6954	GO:0043436
query_1	FALSE	1	59	32	1	0.03125	0.0169492	GO:0019748	GO:BP	secondary metabolic process	21100	6950	GO:0008152
query_1	FALSE	1	751	32	1	0.03125	0.00133156	GO:0019725	GO:BP	cellular homeostasis	21100	6935	c("GO:0009987", "GO:0042592")
query_1	FALSE	1	5487	32	7	0.21875	0.00127574	GO:0019538	GO:BP	protein metabolic process	21100	6769	c("GO:0043170", "GO:0044238", "GO:1901564")
query_1	FALSE	1	502	32	1	0.03125	0.00199203	GO:0019439	GO:BP	aromatic compound catabolic process	21100	6675	c("GO:0006725", "GO:0044248")
query_1	FALSE	1	4068	32	12	0.375	0.00294985	GO:0019438	GO:BP	aromatic compound biosynthetic process	21100	6674	c("GO:0006725", "GO:0044249")
query_1	FALSE	1	139	32	2	0.0625	0.0143885	GO:0019827	GO:BP	stem cell population maintenance	21100	6972	c("GO:0032501", "GO:0098727")
query_1	FALSE	1	19	32	1	0.03125	0.0526316	GO:0019373	GO:BP	epoxygenase P450 pathway	21100	6613	GO:0019369
query_1	FALSE	1	1	32	1	0.03125	1	GO:0019341	GO:BP	dibenzo-p-dioxin catabolic process	21100	6582	c("GO:0018894", "GO:0019439", "GO:0042178", "GO:0044282", "GO:0046700", "GO:1901361")
query_1	FALSE	1	79	32	2	0.0625	0.0253165	GO:0019319	GO:BP	hexose biosynthetic process	21100	6560	c("GO:0019318", "GO:0046364")
query_1	FALSE	1	237	32	2	0.0625	0.00843882	GO:0019318	GO:BP	hexose metabolic process	21100	6559	GO:0005996
query_1	FALSE	1	3	32	1	0.03125	0.333333	GO:0019249	GO:BP	lactate biosynthetic process	21100	6495	c("GO:0006089", "GO:0072330", "GO:1901617")
query_1	FALSE	1	63	32	1	0.03125	0.015873	GO:0019229	GO:BP	regulation of vasoconstriction	21100	6478	c("GO:0042310", "GO:0097746", "GO:1903522")
query_1	FALSE	1	7313	32	14	0.4375	0.0019144	GO:0019222	GO:BP	regulation of metabolic process	21100	6474	c("GO:0008152", "GO:0050789")
query_1	FALSE	1	57	32	1	0.03125	0.0175439	GO:0019369	GO:BP	arachidonic acid metabolic process	21100	6609	c("GO:0001676", "GO:0006690", "GO:0033559", "GO:0120254")
query_1	FALSE	1	3	32	1	0.03125	0.333333	GO:0018894	GO:BP	dibenzo-p-dioxin metabolic process	21100	6310	c("GO:0006725", "GO:0044281", "GO:0046483", "GO:1901360")
query_1	FALSE	1	252	32	1	0.03125	0.00396825	GO:0021537	GO:BP	telencephalon development	21100	7078	c("GO:0030900", "GO:0048856")
query_1	FALSE	1	1642	32	3	0.09375	0.00182704	GO:0022008	GO:BP	neurogenesis	21100	7544	c("GO:0007399", "GO:0030154")
query_1	FALSE	1	224	32	1	0.03125	0.00446429	GO:0030072	GO:BP	peptide hormone secretion	21100	7696	c("GO:0002790", "GO:0046879")
query_1	FALSE	1	1525	32	3	0.09375	0.00196721	GO:0030030	GO:BP	cell projection organization	21100	7676	GO:0016043
query_1	FALSE	1	491	32	1	0.03125	0.00203666	GO:0030003	GO:BP	cellular cation homeostasis	21100	7667	c("GO:0006873", "GO:0055080")
query_1	FALSE	1	459	32	1	0.03125	0.00217865	GO:0023061	GO:BP	signal release	21100	7657	c("GO:0007267", "GO:0032940")
query_1	FALSE	1	1356	32	1	0.03125	0.000737463	GO:0023057	GO:BP	negative regulation of signaling	21100	7653	c("GO:0023051", "GO:0023052", "GO:0048519")
query_1	FALSE	1	1715	32	1	0.03125	0.00058309	GO:0023056	GO:BP	positive regulation of signaling	21100	7652	c("GO:0023051", "GO:0023052", "GO:0048518")
query_1	FALSE	1	162	32	1	0.03125	0.00617284	GO:0021915	GO:BP	neural tube development	21100	7451	c("GO:0007399", "GO:0035295", "GO:0043009", "GO:0060429")
query_1	FALSE	1	6451	32	5	0.15625	0.000775074	GO:0023052	GO:BP	signaling	21100	7648	GO:0008150
query_1	FALSE	1	1862	32	7	0.21875	0.0037594	GO:0022613	GO:BP	ribonucleoprotein complex biogenesis	21100	7605	GO:0044085
query_1	FALSE	1	4587	32	5	0.15625	0.00109004	GO:0022607	GO:BP	cellular component assembly	21100	7599	c("GO:0016043", "GO:0044085")
query_1	FALSE	1	1519	32	3	0.09375	0.00197498	GO:0022414	GO:BP	reproductive process	21100	7589	c("GO:0000003", "GO:0008150")
query_1	FALSE	1	86	32	1	0.03125	0.0116279	GO:0022406	GO:BP	membrane docking	21100	7581	GO:0009987
query_1	FALSE	1	1206	32	3	0.09375	0.00248756	GO:0022402	GO:BP	cell cycle process	21100	7577	c("GO:0007049", "GO:0009987")
query_1	FALSE	1	112	32	1	0.03125	0.00892857	GO:0022037	GO:BP	metencephalon development	21100	7573	c("GO:0030902", "GO:0048856")
query_1	FALSE	1	3351	32	5	0.15625	0.00149209	GO:0023051	GO:BP	regulation of signaling	21100	7647	c("GO:0023052", "GO:0050789")
query_1	TRUE	0.0366178	24	12	2	0.166667	0.0833333	KEGG:04977	KEGG	Vitamin digestion and absorption	7559	390	KEGG:00000
query_1	TRUE	0.0486476	123	12	3	0.25	0.0243902	KEGG:03040	KEGG	Spliceosome	7559	213	KEGG:00000
query_1	FALSE	1	93	12	1	0.0833333	0.0107527	KEGG:04713	KEGG	Circadian entrainment	7559	331	KEGG:00000
query_1	FALSE	1	50	12	1	0.0833333	0.02	KEGG:04913	KEGG	Ovarian steroidogenesis	7559	352	KEGG:00000
query_1	FALSE	1	118	12	1	0.0833333	0.00847458	KEGG:04919	KEGG	Thyroid hormone signaling pathway	7559	358	KEGG:00000
query_1	FALSE	1	211	12	1	0.0833333	0.00473934	KEGG:05166	KEGG	Human T-cell leukemia virus 1 infection	7559	429	KEGG:00000
query_1	FALSE	1	477	12	1	0.0833333	0.00209644	KEGG:05168	KEGG	Herpes simplex virus 1 infection	7559	431	KEGG:00000
query_1	FALSE	1	207	12	1	0.0833333	0.00483092	KEGG:05170	KEGG	Human immunodeficiency virus 1 infection	7559	433	KEGG:00000
query_1	FALSE	1	182	12	1	0.0833333	0.00549451	KEGG:05202	KEGG	Transcriptional misregulation in cancer	7559	436	KEGG:00000
query_1	FALSE	1	194	12	1	0.0833333	0.00515464	KEGG:05203	KEGG	Viral carcinogenesis	7559	437	KEGG:00000
query_1	FALSE	1	63	12	1	0.0833333	0.015873	KEGG:05204	KEGG	Chemical carcinogenesis - DNA adducts	7559	438	KEGG:00000
query_1	FALSE	1	202	12	1	0.0833333	0.0049505	KEGG:05207	KEGG	Chemical carcinogenesis - receptor activation	7559	441	KEGG:00000
query_1	FALSE	1	206	12	1	0.0833333	0.00485437	KEGG:05208	KEGG	Chemical carcinogenesis - reactive oxygen species	7559	442	KEGG:00000
query_1	FALSE	1	65	12	1	0.0833333	0.0153846	KEGG:05221	KEGG	Acute myeloid leukemia	7559	454	KEGG:00000
query_1	FALSE	1	209	12	1	0.0833333	0.00478469	KEGG:05417	KEGG	Lipid and atherosclerosis	7559	476	KEGG:00000
query_1	FALSE	1	30	12	1	0.0833333	0.0333333	KEGG:04710	KEGG	Circadian rhythm	7559	328	KEGG:00000
query_1	FALSE	1	55	12	1	0.0833333	0.0181818	KEGG:04330	KEGG	Notch signaling pathway	7559	284	KEGG:00000
query_1	FALSE	1	88	12	1	0.0833333	0.0113636	KEGG:03008	KEGG	Ribosome biogenesis in eukaryotes	7559	205	KEGG:00000
query_1	FALSE	1	29	12	1	0.0833333	0.0344828	KEGG:01523	KEGG	Antifolate resistance	7559	195	KEGG:00000
query_1	FALSE	1	143	12	1	0.0833333	0.00699301	KEGG:01240	KEGG	Biosynthesis of cofactors	7559	188	KEGG:00000
query_1	FALSE	1	74	12	1	0.0833333	0.0135135	KEGG:01230	KEGG	Biosynthesis of amino acids	7559	186	KEGG:00000
query_1	FALSE	1	1457	12	3	0.25	0.00205903	KEGG:01100	KEGG	Metabolic pathways	7559	179	KEGG:00000
query_1	FALSE	1	68	12	1	0.0833333	0.0147059	KEGG:00980	KEGG	Metabolism of xenobiotics by cytochrome P450	7559	152	KEGG:00000
query_1	FALSE	1	41	12	1	0.0833333	0.0243902	KEGG:00970	KEGG	Aminoacyl-tRNA biosynthesis	7559	151	KEGG:00000
query_1	FALSE	1	56	12	1	0.0833333	0.0178571	KEGG:03250	KEGG	Viral life cycle - HIV-1	7559	219	KEGG:00000
query_1	FALSE	1	60	12	1	0.0833333	0.0166667	KEGG:00830	KEGG	Retinol metabolism	7559	127	KEGG:00000
query_1	FALSE	1	42	12	1	0.0833333	0.0238095	KEGG:00380	KEGG	Tryptophan metabolism	7559	49	KEGG:00000
query_1	FALSE	1	49	12	1	0.0833333	0.0204082	KEGG:00270	KEGG	Cysteine and methionine metabolism	7559	30	KEGG:00000
query_1	FALSE	1	58	12	1	0.0833333	0.0172414	KEGG:00140	KEGG	Steroid hormone biosynthesis	7559	17	KEGG:00000
query_1	FALSE	1	7559	12	12	1	0.00158751	KEGG:00000	KEGG	KEGG root term	7559	1	character(0)
query_1	FALSE	1	17	12	1	0.0833333	0.0588235	KEGG:00450	KEGG	Selenocompound metabolism	7559	59	KEGG:00000
query_1	TRUE	0.000544369	661	21	9	0.428571	0.0136157	REAC:R-HSA-8953854	REAC	Metabolism of RNA	10770	1333	REAC:0000000
query_1	FALSE	0.0597628	59	21	3	0.142857	0.0508475	REAC:R-HSA-6790901	REAC	rRNA modification in the nucleus and cytosol	10770	2560	REAC:R-HSA-8868773
query_1	FALSE	0.106937	178	21	4	0.190476	0.0224719	REAC:R-HSA-72163	REAC	mRNA Splicing - Major Pathway	10770	2536	REAC:R-HSA-72172
query_1	FALSE	0.116374	182	21	4	0.190476	0.021978	REAC:R-HSA-6791226	REAC	Major pathway of rRNA processing in the nucleolus and cytosol	10770	1309	REAC:R-HSA-8868773
query_1	FALSE	0.126395	186	21	4	0.190476	0.0215054	REAC:R-HSA-72172	REAC	mRNA Splicing	10770	2535	REAC:R-HSA-72203
query_1	FALSE	0.142567	192	21	4	0.190476	0.0208333	REAC:R-HSA-8868773	REAC	rRNA processing in the nucleus and cytosol	10770	2563	REAC:R-HSA-72312
query_1	FALSE	0.172737	202	21	4	0.190476	0.019802	REAC:R-HSA-72312	REAC	rRNA processing	10770	2561	REAC:R-HSA-8953854
query_1	FALSE	0.314481	237	21	4	0.190476	0.0168776	REAC:R-HSA-72203	REAC	Processing of Capped Intron-Containing Pre-mRNA	10770	1691	REAC:R-HSA-8953854
query_1	FALSE	0.601809	1	21	1	0.047619	1	REAC:R-HSA-3359474	REAC	Defective MMACHC causes MAHCC	10770	562	REAC:R-HSA-3296469
query_1	FALSE	1	806	21	1	0.047619	0.00124069	REAC:R-HSA-1280218	REAC	Adaptive Immune System	10770	113	REAC:R-HSA-168256
query_1	FALSE	1	308	21	1	0.047619	0.00324675	REAC:R-HSA-983168	REAC	Antigen processing: Ubiquitination & Proteasome degradation	10770	148	REAC:R-HSA-983169
query_1	FALSE	1	59	21	1	0.047619	0.0169492	REAC:R-HSA-2142753	REAC	Arachidonic acid metabolism	10770	160	REAC:R-HSA-8978868
query_1	FALSE	1	90	21	1	0.047619	0.0111111	REAC:R-HSA-5250924	REAC	B-WICH complex positively regulates rRNA expression	10770	191	REAC:R-HSA-5250913
query_1	FALSE	1	2	21	1	0.047619	0.5	REAC:R-HSA-3359473	REAC	Defective MMADHC causes MMAHCD	10770	563	REAC:R-HSA-3296469
query_1	FALSE	1	13	21	1	0.047619	0.0769231	REAC:R-HSA-2564830	REAC	Cytosolic iron-sulfur cluster assembly	10770	405	REAC:R-HSA-1430728
query_1	FALSE	1	64	21	1	0.047619	0.015625	REAC:R-HSA-211897	REAC	Cytochrome P450 - arranged by substrate type	10770	401	REAC:R-HSA-211945
query_1	FALSE	1	57	21	1	0.047619	0.0175439	REAC:R-HSA-2644606	REAC	Constitutive Signaling by NOTCH1 PEST Domain Mutants	10770	383	REAC:R-HSA-2644602
query_1	FALSE	1	57	21	1	0.047619	0.0175439	REAC:R-HSA-2894862	REAC	Constitutive Signaling by NOTCH1 HD+PEST Domain Mutants	10770	382	REAC:R-HSA-2894858
query_1	FALSE	1	21	21	1	0.047619	0.047619	REAC:R-HSA-196741	REAC	Cobalamin (Cbl, vitamin B12) transport and metabolism	10770	360	REAC:R-HSA-196849
query_1	FALSE	1	377	21	1	0.047619	0.00265252	REAC:R-HSA-983169	REAC	Class I MHC mediated antigen processing & presentation	10770	352	REAC:R-HSA-1280218
query_1	FALSE	1	273	21	1	0.047619	0.003663	REAC:R-HSA-4839726	REAC	Chromatin organization	10770	341	REAC:0000000
query_1	FALSE	1	273	21	1	0.047619	0.003663	REAC:R-HSA-3247509	REAC	Chromatin modifying enzymes	10770	340	REAC:R-HSA-4839726
query_1	FALSE	1	18	21	1	0.047619	0.0555556	REAC:R-HSA-9018678	REAC	Biosynthesis of specialized proresolving mediators (SPMs)	10770	238	REAC:R-HSA-556833
query_1	FALSE	1	4	21	1	0.047619	0.25	REAC:R-HSA-9018681	REAC	Biosynthesis of protectins	10770	237	REAC:R-HSA-9018677
query_1	FALSE	1	16	21	1	0.047619	0.0625	REAC:R-HSA-9018677	REAC	Biosynthesis of DHA-derived SPMs	10770	220	REAC:R-HSA-9018678
query_1	FALSE	1	215	21	2	0.0952381	0.00930233	REAC:R-HSA-211859	REAC	Biological oxidations	10770	217	REAC:R-HSA-1430728
query_1	FALSE	1	67	21	1	0.047619	0.0149254	REAC:R-HSA-400253	REAC	Circadian Clock	10770	347	REAC:0000000
query_1	FALSE	1	14	21	1	0.047619	0.0714286	REAC:R-HSA-3296469	REAC	Defects in cobalamin (B12) metabolism	10770	680	REAC:R-HSA-3296482
query_1	FALSE	1	22	21	1	0.047619	0.0454545	REAC:R-HSA-3296482	REAC	Defects in vitamin and cofactor metabolism	10770	681	REAC:R-HSA-5668914
query_1	FALSE	1	1116	21	1	0.047619	0.000896057	REAC:R-HSA-1266738	REAC	Developmental Biology	10770	702	REAC:0000000
query_1	FALSE	1	111	21	1	0.047619	0.00900901	REAC:R-HSA-73864	REAC	RNA Polymerase I Transcription	10770	1777	REAC:R-HSA-74160
query_1	FALSE	1	47	21	1	0.047619	0.0212766	REAC:R-HSA-73762	REAC	RNA Polymerase I Transcription Initiation	10770	1778	REAC:R-HSA-73854
query_1	FALSE	1	1342	21	5	0.238095	0.00372578	REAC:R-HSA-73857	REAC	RNA Polymerase II Transcription	10770	1783	REAC:R-HSA-74160
query_1	FALSE	1	65	21	2	0.0952381	0.0307692	REAC:R-HSA-73856	REAC	RNA Polymerase II Transcription Termination	10770	1788	REAC:R-HSA-73857
query_1	FALSE	1	73	21	1	0.047619	0.0136986	REAC:R-HSA-6807505	REAC	RNA polymerase II transcribes snRNA genes	10770	1797	REAC:R-HSA-73857
query_1	FALSE	1	14	21	1	0.047619	0.0714286	REAC:R-HSA-8941856	REAC	RUNX3 regulates NOTCH signaling	10770	1826	REAC:R-HSA-8878159
query_1	FALSE	1	120	21	1	0.047619	0.00833333	REAC:R-HSA-9007101	REAC	Rab regulation of trafficking	10770	1831	REAC:R-HSA-199991
query_1	FALSE	1	39	21	1	0.047619	0.025641	REAC:R-HSA-186712	REAC	Regulation of beta-cell development	10770	1891	REAC:R-HSA-1266738
query_1	FALSE	1	16	21	1	0.047619	0.0625	REAC:R-HSA-210744	REAC	Regulation of gene expression in late stage (branching morphogenesis) pancreatic bud precursor cells	10770	1902	REAC:R-HSA-186712
query_1	FALSE	1	114	21	1	0.047619	0.00877193	REAC:R-HSA-400206	REAC	Regulation of lipid metabolism by PPARalpha	10770	1906	REAC:R-HSA-556833
query_1	FALSE	1	2523	21	1	0.047619	0.000396354	REAC:R-HSA-162582	REAC	Signal Transduction	10770	2062	REAC:0000000
query_1	FALSE	1	233	21	1	0.047619	0.00429185	REAC:R-HSA-157118	REAC	Signaling by NOTCH	10770	2121	REAC:R-HSA-162582
query_1	FALSE	1	72	21	1	0.047619	0.0138889	REAC:R-HSA-1980143	REAC	Signaling by NOTCH1	10770	2122	REAC:R-HSA-157118
query_1	FALSE	1	57	21	1	0.047619	0.0175439	REAC:R-HSA-2894858	REAC	Signaling by NOTCH1 HD+PEST Domain Mutants in Cancer	10770	2124	REAC:R-HSA-2644603
query_1	FALSE	1	57	21	1	0.047619	0.0175439	REAC:R-HSA-2644602	REAC	Signaling by NOTCH1 PEST Domain Mutants in Cancer	10770	2125	REAC:R-HSA-2644603
query_1	FALSE	1	57	21	1	0.047619	0.0175439	REAC:R-HSA-2644603	REAC	Signaling by NOTCH1 in Cancer	10770	2126	REAC:R-HSA-5663202
query_1	FALSE	1	48	21	1	0.047619	0.0208333	REAC:R-HSA-9012852	REAC	Signaling by NOTCH3	10770	2129	REAC:R-HSA-157118
query_1	FALSE	1	41	21	1	0.047619	0.0243902	REAC:R-HSA-6782315	REAC	tRNA modification in the nucleus and cytosol	10770	2571	REAC:R-HSA-72306
query_1	FALSE	1	42	21	1	0.047619	0.0238095	REAC:R-HSA-379724	REAC	tRNA Aminoacylation	10770	2569	REAC:R-HSA-72766
query_1	FALSE	1	51	21	1	0.047619	0.0196078	REAC:R-HSA-72165	REAC	mRNA Splicing - Minor Pathway	10770	2537	REAC:R-HSA-72172
query_1	FALSE	1	56	21	2	0.0952381	0.0357143	REAC:R-HSA-72187	REAC	mRNA 3'-end processing	10770	2530	REAC:R-HSA-72203
query_1	FALSE	1	23	21	1	0.047619	0.0434783	REAC:R-HSA-211981	REAC	Xenobiotics	10770	2508	REAC:R-HSA-211897
query_1	FALSE	1	718	21	1	0.047619	0.00139276	REAC:R-HSA-5653656	REAC	Vesicle-mediated transport	10770	2477	REAC:0000000
query_1	FALSE	1	110	21	1	0.047619	0.00909091	REAC:R-HSA-73854	REAC	RNA Polymerase I Promoter Clearance	10770	1774	REAC:R-HSA-73864
query_1	FALSE	1	221	21	1	0.047619	0.00452489	REAC:R-HSA-5689880	REAC	Ub-specific processing proteases	10770	2449	REAC:R-HSA-5688426
query_1	FALSE	1	80	21	2	0.0952381	0.025	REAC:R-HSA-72202	REAC	Transport of Mature Transcript to Cytoplasm	10770	2417	REAC:R-HSA-72203
query_1	FALSE	1	292	21	2	0.0952381	0.00684932	REAC:R-HSA-72766	REAC	Translation	10770	2400	REAC:R-HSA-392499
query_1	FALSE	1	94	21	1	0.047619	0.0106383	REAC:R-HSA-8878159	REAC	Transcriptional regulation by RUNX3	10770	2391	REAC:R-HSA-212436
query_1	FALSE	1	8	21	1	0.047619	0.125	REAC:R-HSA-2142670	REAC	Synthesis of epoxy (EET) and dihydroxyeicosatrienoic acids (DHET)	10770	2250	REAC:R-HSA-2142753
query_1	FALSE	1	9	21	1	0.047619	0.111111	REAC:R-HSA-2142816	REAC	Synthesis of (16-20)-hydroxyeicosatetraenoic acids (HETE)	10770	2211	REAC:R-HSA-2142753
query_1	FALSE	1	81	21	1	0.047619	0.0123457	REAC:R-HSA-9013694	REAC	Signaling by NOTCH4	10770	2130	REAC:R-HSA-157118
query_1	FALSE	1	71	21	2	0.0952381	0.028169	REAC:R-HSA-159236	REAC	Transport of Mature mRNA derived from an Intron-Containing Transcript	10770	2419	REAC:R-HSA-72202
query_1	FALSE	1	298	21	1	0.047619	0.0033557	REAC:R-HSA-5688426	REAC	Deubiquitination	10770	701	REAC:R-HSA-597592
query_1	FALSE	1	88	21	1	0.047619	0.0113636	REAC:R-HSA-8876198	REAC	RAB GEFs exchange GTP for GDP on RABs	10770	1727	REAC:R-HSA-9007101
query_1	FALSE	1	109	21	1	0.047619	0.00917431	REAC:R-HSA-1912422	REAC	Pre-NOTCH Expression and Processing	10770	1679	REAC:R-HSA-157118
query_1	FALSE	1	1694	21	2	0.0952381	0.00118064	REAC:R-HSA-1643685	REAC	Disease	10770	709	REAC:0000000
query_1	FALSE	1	241	21	1	0.047619	0.00414938	REAC:R-HSA-5668914	REAC	Diseases of metabolism	10770	728	REAC:R-HSA-1643685
query_1	FALSE	1	417	21	1	0.047619	0.00239808	REAC:R-HSA-5663202	REAC	Diseases of signal transduction by growth factor receptors and second messengers	10770	734	REAC:R-HSA-1643685
query_1	FALSE	1	147	21	1	0.047619	0.00680272	REAC:R-HSA-212165	REAC	Epigenetic regulation of gene expression	10770	808	REAC:R-HSA-74160
query_1	FALSE	1	173	21	1	0.047619	0.00578035	REAC:R-HSA-8978868	REAC	Fatty acid metabolism	10770	886	REAC:R-HSA-556833
query_1	FALSE	1	1478	21	5	0.238095	0.00338295	REAC:R-HSA-74160	REAC	Gene expression (Transcription)	10770	982	REAC:0000000
query_1	FALSE	1	1221	21	2	0.0952381	0.001638	REAC:R-HSA-212436	REAC	Generic Transcription Pathway	10770	984	REAC:R-HSA-73857
query_1	FALSE	1	141	21	1	0.047619	0.0070922	REAC:R-HSA-3214847	REAC	HATs acetylate histones	10770	1021	REAC:R-HSA-3247509
query_1	FALSE	1	2041	21	1	0.047619	0.000489956	REAC:R-HSA-168256	REAC	Immune System	10770	1102	REAC:0000000
query_1	FALSE	1	624	21	1	0.047619	0.00160256	REAC:R-HSA-199991	REAC	Membrane Trafficking	10770	1328	REAC:R-HSA-5653656
query_1	FALSE	1	2075	21	5	0.238095	0.00240964	REAC:R-HSA-1430728	REAC	Metabolism	10770	1331	REAC:0000000
query_1	FALSE	1	16	21	1	0.047619	0.0625	REAC:R-HSA-196757	REAC	Metabolism of folate and pterines	10770	1339	REAC:R-HSA-196849
query_1	FALSE	1	728	21	1	0.047619	0.00137363	REAC:R-HSA-556833	REAC	Metabolism of lipids	10770	1343	REAC:R-HSA-1430728
query_1	FALSE	1	1944	21	3	0.142857	0.00154321	REAC:R-HSA-392499	REAC	Metabolism of proteins	10770	1349	REAC:0000000
query_1	FALSE	1	186	21	2	0.0952381	0.0107527	REAC:R-HSA-196854	REAC	Metabolism of vitamins and cofactors	10770	1354	REAC:R-HSA-1430728
query_1	FALSE	1	120	21	2	0.0952381	0.0166667	REAC:R-HSA-196849	REAC	Metabolism of water-soluble vitamins and cofactors	10770	1355	REAC:R-HSA-196854
query_1	FALSE	1	14	21	1	0.047619	0.0714286	REAC:R-HSA-156581	REAC	Methylation	10770	1361	REAC:R-HSA-156580
query_1	FALSE	1	1414	21	1	0.047619	0.000707214	REAC:R-HSA-597592	REAC	Post-translational protein modification	10770	1672	REAC:R-HSA-392499
query_1	FALSE	1	105	21	1	0.047619	0.00952381	REAC:R-HSA-5250913	REAC	Positive epigenetic regulation of rRNA expression	10770	1667	REAC:R-HSA-212165
query_1	FALSE	1	106	21	1	0.047619	0.00943396	REAC:R-HSA-156580	REAC	Phase II - Conjugation of compounds	10770	1634	REAC:R-HSA-211859
query_1	FALSE	1	103	21	1	0.047619	0.00970874	REAC:R-HSA-211945	REAC	Phase I - Functionalization of compounds	10770	1633	REAC:R-HSA-211859
query_1	FALSE	1	113	21	1	0.047619	0.00884956	REAC:R-HSA-1989781	REAC	PPARA activates gene expression	10770	1597	REAC:R-HSA-400206
query_1	FALSE	1	28	21	1	0.047619	0.0357143	REAC:R-HSA-350054	REAC	Notch-HLH transcription pathway	10770	1510	REAC:R-HSA-212436
query_1	FALSE	1	93	21	1	0.047619	0.0107527	REAC:R-HSA-1912408	REAC	Pre-NOTCH Transcription and Translation	10770	1682	REAC:R-HSA-1912422
query_1	FALSE	1	20	21	1	0.047619	0.05	REAC:R-HSA-9013695	REAC	NOTCH4 Intracellular Domain Regulates Transcription	10770	1440	REAC:R-HSA-9013694
query_1	FALSE	1	46	21	1	0.047619	0.0217391	REAC:R-HSA-2122947	REAC	NOTCH1 Intracellular Domain Regulates Transcription	10770	1434	REAC:R-HSA-1980143
query_1	FALSE	1	87	21	1	0.047619	0.0114943	REAC:R-HSA-5419276	REAC	Mitochondrial translation termination	10770	1387	REAC:R-HSA-5368287
query_1	FALSE	1	87	21	1	0.047619	0.0114943	REAC:R-HSA-5368286	REAC	Mitochondrial translation initiation	10770	1386	REAC:R-HSA-5368287
query_1	FALSE	1	87	21	1	0.047619	0.0114943	REAC:R-HSA-5389840	REAC	Mitochondrial translation elongation	10770	1385	REAC:R-HSA-5368287
query_1	FALSE	1	93	21	1	0.047619	0.0107527	REAC:R-HSA-5368287	REAC	Mitochondrial translation	10770	1384	REAC:R-HSA-72766
query_1	FALSE	1	21	21	1	0.047619	0.047619	REAC:R-HSA-379726	REAC	Mitochondrial tRNA aminoacylation	10770	1381	REAC:R-HSA-379724
query_1	FALSE	1	24	21	1	0.047619	0.0416667	REAC:R-HSA-9013508	REAC	NOTCH3 Intracellular Domain Regulates Transcription	10770	1438	REAC:R-HSA-9012852
query_1	FALSE	1	103	21	1	0.047619	0.00970874	REAC:R-HSA-72306	REAC	tRNA processing	10770	2572	REAC:R-HSA-8953854
query_1	FALSE	1	10770	21	21	1	0.00194986	REAC:0000000	REAC	REACTOME root term	10770	2581	character(0)
