# Supplementary material for: Predicting clinical response to everolimus in ER+ breast cancers using machine-learning
Source: Front Mol Biosci. 2022 Oct 11;9:981962. doi: 10.3389/fmolb.2022.981962 (PMC9592823; doi:10.3389/fmolb.2022.981962)
Supplement: Supplementary file 4 [file Table6.XLSX]

## Sheet: Supp_Table_6
Integrated everolimus signature
1	CYP1A1
2	METTL1
3	DHX37
4	LTV1
5	NUBP1
6	SLC19A1
7	UTP20
8	GPATCH4
9	TEF
10	LANCL2
11	HEATR3
12	ZNF414
13	PER2
14	MARS2
15	DTWD2
16	CCDC58
17	MON1A
18	SCFD2
19	ZNF668
20	MMACHC
21	U2AF2
22	SP2
23	NCOA5
24	MRPL54
25	MAT2A
26	AMIGO3
27	UTP15
28	SRFBP1
29	HMOX1
30	SLC7A11
31	GCLM
32	TXNRD1
33	SRXN1
34	GCLC
35	PIM1
36	ABHD4
37	GADD45G
38	MAFG
39	SQSTM1
40	HBP1
41	BBC3
42	KLHL24
43	ULK1
44	FECH
45	IRS2
46	RIT1
47	BSDC1
48	JUND
49	NUMBL
50	SYF2
51	ZFAND5
52	ANKZF1
53	HECA
54	TP53INP1
55	PNRC1
56	FRAT1
57	NBR1
58	CAMLG
59	FRAT2
60	OTUD5
61	JMY
62	DGCR8
63	WBP2
64	CLDND1
65	STK40
66	ZNF222
67	TNKS
68	SLC35D2
69	RFFL
70	TMEM50A
71	MYB
72	CRIPT
73	PJA2
74	ZNF160
75	ZXDB
76	PLP2
77	MTX3
78	RETNLB
79	DISC1
80	FOLR3
81	PHKB
82	SERPINA3
83	SIAH1
84	C14orf39
85	FAM86A
86	GPR162
87	RASL11B
88	MS4A2
89	PTS
90	RASSF1
91	SEC14L1
92	TCF25
93	ATP11B
94	IL15RA
95	KLHL15
96	NOL10
97	UBE2J1
