# Supplementary material for: Predicting clinical response to everolimus in ER+ breast cancers using machine-learning
Source: Front Mol Biosci. 2022 Oct 11;9:981962. doi: 10.3389/fmolb.2022.981962 (PMC9592823; doi:10.3389/fmolb.2022.981962)
Supplement: Supplementary file 5 [file Table4.XLSX]

## Sheet: Supp_Table_4
query	significant	p_value	term_size	query_size	intersection_size	precision	recall	term_id	source	term_name	effective_domain_size	source_order	parents
query_1	TRUE	1.98671e-73	2781	211	144	0.682464	0.0517799	GO:0002376	GO:BP	immune system process	21100	1029	GO:0008150
query_1	TRUE	5.25633e-71	1906	211	124	0.587678	0.0650577	GO:0006955	GO:BP	immune response	21100	2888	c("GO:0002376", "GO:0050896")
query_1	TRUE	3.46694e-54	1442	211	98	0.464455	0.0679612	GO:0002682	GO:BP	regulation of immune system process	21100	1323	c("GO:0002376", "GO:0050789")
query_1	TRUE	6.92515e-50	936	211	80	0.379147	0.0854701	GO:0002684	GO:BP	positive regulation of immune system process	21100	1325	c("GO:0002376", "GO:0002682", "GO:0048518")
query_1	TRUE	9.17203e-46	1736	211	97	0.459716	0.0558756	GO:0006952	GO:BP	defense response	21100	2885	GO:0006950
query_1	TRUE	4.87123e-42	1507	211	88	0.417062	0.0583942	GO:0051707	GO:BP	response to other organism	21100	16056	c("GO:0043207", "GO:0044419")
query_1	TRUE	5.42563e-42	1509	211	88	0.417062	0.0583168	GO:0043207	GO:BP	response to external biotic stimulus	21100	12195	c("GO:0009605", "GO:0009607")
query_1	TRUE	4.52747e-41	1549	211	88	0.417062	0.0568108	GO:0009607	GO:BP	response to biotic stimulus	21100	3979	GO:0050896
query_1	TRUE	1.39319e-40	1659	211	90	0.42654	0.0542495	GO:0044419	GO:BP	biological process involved in interspecies interaction between organisms	21100	12783	GO:0008150
query_1	TRUE	7.99429e-40	903	211	70	0.331754	0.0775194	GO:0050776	GO:BP	regulation of immune response	21100	15313	c("GO:0002682", "GO:0006955", "GO:0048583")
query_1	TRUE	2.11063e-39	1094	211	75	0.35545	0.0685558	GO:0001775	GO:BP	cell activation	21100	552	GO:0009987
query_1	TRUE	7.75228e-38	2788	211	109	0.516588	0.0390961	GO:0009605	GO:BP	response to external stimulus	21100	3977	GO:0050896
query_1	TRUE	1.93729e-37	1167	211	75	0.35545	0.0642674	GO:0098542	GO:BP	defense response to other organism	21100	21990	c("GO:0006952", "GO:0051707")
query_1	TRUE	3.19077e-37	953	211	69	0.327014	0.0724029	GO:0045321	GO:BP	leukocyte activation	21100	13217	c("GO:0001775", "GO:0002376")
query_1	TRUE	9.34197e-35	794	211	62	0.293839	0.0780856	GO:0046649	GO:BP	lymphocyte activation	21100	14265	GO:0045321
query_1	TRUE	6.40519e-34	600	211	55	0.260664	0.0916667	GO:0050778	GO:BP	positive regulation of immune response	21100	15315	c("GO:0002684", "GO:0006955", "GO:0048584", "GO:0050776")
query_1	TRUE	2.07837e-33	907	211	64	0.303318	0.0705623	GO:0045087	GO:BP	innate immune response	21100	13117	c("GO:0006955", "GO:0098542")
query_1	TRUE	6.50074e-33	8885	211	177	0.838863	0.0199212	GO:0050896	GO:BP	response to stimulus	21100	15410	GO:0008150
query_1	TRUE	2.08674e-30	2169	211	89	0.421801	0.0410327	GO:0048584	GO:BP	positive regulation of response to stimulus	21100	14896	c("GO:0048518", "GO:0048583", "GO:0050896")
query_1	TRUE	1.33168e-27	504	211	46	0.218009	0.0912698	GO:0042110	GO:BP	T cell activation	21100	11538	GO:0046649
query_1	TRUE	5.05337e-27	3851	211	112	0.530806	0.0290834	GO:0006950	GO:BP	response to stress	21100	2884	GO:0050896
query_1	TRUE	1.81006e-26	661	211	50	0.236967	0.075643	GO:0002252	GO:BP	immune effector process	21100	907	GO:0002376
query_1	TRUE	7.27806e-26	3895	211	111	0.526066	0.0284981	GO:0048583	GO:BP	regulation of response to stimulus	21100	14895	c("GO:0050789", "GO:0050896")
query_1	TRUE	2.42467e-25	6224	211	140	0.663507	0.0224936	GO:0048518	GO:BP	positive regulation of biological process	21100	14840	c("GO:0008150", "GO:0050789")
query_1	TRUE	3.686e-25	671	211	49	0.232227	0.0730253	GO:0050865	GO:BP	regulation of cell activation	21100	15384	c("GO:0001775", "GO:0050794")
query_1	TRUE	8.49832e-25	718	211	50	0.236967	0.0696379	GO:0002250	GO:BP	adaptive immune response	21100	905	GO:0006955
query_1	TRUE	2.42989e-24	921	211	55	0.260664	0.0597177	GO:0034097	GO:BP	response to cytokine	21100	9668	GO:0010033
query_1	TRUE	8.20382e-23	831	211	51	0.241706	0.0613718	GO:0071345	GO:BP	cellular response to cytokine stimulus	21100	19374	c("GO:0034097", "GO:0071310")
query_1	TRUE	8.85629e-23	950	211	54	0.255924	0.0568421	GO:0032101	GO:BP	regulation of response to external stimulus	21100	8539	c("GO:0009605", "GO:0048583")
query_1	TRUE	1.08329e-22	620	211	45	0.21327	0.0725806	GO:0002694	GO:BP	regulation of leukocyte activation	21100	1335	c("GO:0002682", "GO:0045321", "GO:0050865")
query_1	TRUE	1.76657e-22	529	211	42	0.199052	0.0793951	GO:0051249	GO:BP	regulation of lymphocyte activation	21100	15704	c("GO:0002694", "GO:0046649")
query_1	TRUE	2.90014e-22	778	211	49	0.232227	0.062982	GO:0006954	GO:BP	inflammatory response	21100	2887	GO:0006952
query_1	TRUE	9.24681e-22	400	211	37	0.175355	0.0925	GO:0002253	GO:BP	activation of immune response	21100	908	c("GO:0002376", "GO:0050778")
query_1	TRUE	9.88147e-22	373	211	36	0.170616	0.0965147	GO:0007159	GO:BP	leukocyte cell-cell adhesion	21100	3059	GO:0098609
query_1	TRUE	2.02564e-21	438	211	38	0.180095	0.086758	GO:0002443	GO:BP	leukocyte mediated immunity	21100	1089	GO:0002252
query_1	TRUE	2.53642e-21	2811	211	88	0.417062	0.0313056	GO:0007166	GO:BP	cell surface receptor signaling pathway	21100	3066	GO:0007165
query_1	TRUE	6.81581e-21	453	211	38	0.180095	0.0838852	GO:0032103	GO:BP	positive regulation of response to external stimulus	21100	8541	c("GO:0009605", "GO:0032101", "GO:0048584")
query_1	TRUE	1.23456e-19	5957	211	128	0.606635	0.0214873	GO:0007165	GO:BP	signal transduction	21100	3065	c("GO:0007154", "GO:0009987", "GO:0023052", "GO:0050794", "GO:0051716")
query_1	TRUE	1.31128e-19	430	211	36	0.170616	0.0837209	GO:0050867	GO:BP	positive regulation of cell activation	21100	15386	c("GO:0001775", "GO:0048522", "GO:0050865")
query_1	TRUE	1.86221e-19	497	211	38	0.180095	0.0764588	GO:0002764	GO:BP	immune response-regulating signaling pathway	21100	1399	c("GO:0007165", "GO:0050776")
query_1	TRUE	5.7954e-19	726	211	44	0.208531	0.0606061	GO:0001817	GO:BP	regulation of cytokine production	21100	586	c("GO:0001816", "GO:0010468", "GO:0051239")
query_1	TRUE	8.02238e-19	732	211	44	0.208531	0.0601093	GO:0001816	GO:BP	cytokine production	21100	585	c("GO:0010467", "GO:0032501")
query_1	TRUE	1.35985e-18	342	211	32	0.151659	0.0935673	GO:0050863	GO:BP	regulation of T cell activation	21100	15382	c("GO:0042110", "GO:0051249")
query_1	TRUE	2.04085e-18	996	211	50	0.236967	0.0502008	GO:0002520	GO:BP	immune system development	21100	1165	c("GO:0002376", "GO:0048731")
query_1	TRUE	2.22883e-18	500	211	37	0.175355	0.074	GO:0019221	GO:BP	cytokine-mediated signaling pathway	21100	6473	c("GO:0007166", "GO:0071345")
query_1	TRUE	3.02896e-18	6508	211	132	0.625592	0.0202827	GO:0007154	GO:BP	cell communication	21100	3054	GO:0009987
query_1	TRUE	4.62459e-18	415	211	34	0.161137	0.0819277	GO:0002696	GO:BP	positive regulation of leukocyte activation	21100	1337	c("GO:0002684", "GO:0002694", "GO:0045321", "GO:0050867")
query_1	TRUE	4.86738e-18	6451	211	131	0.620853	0.0203069	GO:0023052	GO:BP	signaling	21100	7648	GO:0008150
query_1	TRUE	1.06062e-17	629	211	40	0.189573	0.063593	GO:0031347	GO:BP	regulation of defense response	21100	8278	c("GO:0006952", "GO:0080134")
query_1	TRUE	1.5757e-17	314	211	30	0.14218	0.0955414	GO:0002429	GO:BP	immune response-activating cell surface receptor signaling pathway	21100	1075	c("GO:0002757", "GO:0002768")
query_1	TRUE	1.5757e-17	314	211	30	0.14218	0.0955414	GO:0002757	GO:BP	immune response-activating signal transduction	21100	1392	c("GO:0002253", "GO:0002764")
query_1	TRUE	1.90736e-17	344	211	31	0.146919	0.0901163	GO:0002768	GO:BP	immune response-regulating cell surface receptor signaling pathway	21100	1403	c("GO:0002764", "GO:0007166")
query_1	TRUE	2.07812e-17	345	211	31	0.146919	0.0898551	GO:0002449	GO:BP	lymphocyte mediated immunity	21100	1095	GO:0002443
query_1	TRUE	6.38042e-17	302	211	29	0.137441	0.0960265	GO:0031349	GO:BP	positive regulation of defense response	21100	8280	c("GO:0006952", "GO:0031347", "GO:0048584")
query_1	TRUE	7.65425e-17	5687	211	120	0.56872	0.0211008	GO:0048522	GO:BP	positive regulation of cellular process	21100	14844	c("GO:0009987", "GO:0048518", "GO:0050794")
query_1	TRUE	9.26956e-17	334	211	30	0.14218	0.0898204	GO:1903037	GO:BP	regulation of leukocyte cell-cell adhesion	21100	26150	c("GO:0007159", "GO:0022407")
query_1	TRUE	9.37e-17	11193	211	175	0.829384	0.0156348	GO:0050794	GO:BP	regulation of cellular process	21100	15325	c("GO:0009987", "GO:0050789")
query_1	TRUE	2.37821e-16	470	211	34	0.161137	0.0723404	GO:0001819	GO:BP	positive regulation of cytokine production	21100	588	c("GO:0001816", "GO:0001817", "GO:0010628", "GO:0051240")
query_1	TRUE	3.78841e-16	444	211	33	0.156398	0.0743243	GO:0022407	GO:BP	regulation of cell-cell adhesion	21100	7582	c("GO:0030155", "GO:0098609")
query_1	TRUE	6.30489e-16	1434	211	56	0.265403	0.0390516	GO:0051240	GO:BP	positive regulation of multicellular organismal process	21100	15698	c("GO:0032501", "GO:0048518", "GO:0051239")
query_1	TRUE	8.08013e-16	331	211	29	0.137441	0.0876133	GO:0070661	GO:BP	leukocyte proliferation	21100	18994	GO:0008283
query_1	TRUE	1.0272e-15	563	211	36	0.170616	0.0639432	GO:0002521	GO:BP	leukocyte differentiation	21100	1166	c("GO:0030097", "GO:0030154")
query_1	TRUE	1.44799e-15	368	211	30	0.14218	0.0815217	GO:0051251	GO:BP	positive regulation of lymphocyte activation	21100	15706	c("GO:0002696", "GO:0046649", "GO:0051249")
query_1	TRUE	3.44491e-15	349	211	29	0.137441	0.0830946	GO:0002697	GO:BP	regulation of immune effector process	21100	1338	c("GO:0002252", "GO:0002682")
query_1	TRUE	3.46002e-15	740	211	40	0.189573	0.0540541	GO:0030155	GO:BP	regulation of cell adhesion	21100	7717	c("GO:0007155", "GO:0050794")
query_1	TRUE	5.07632e-15	242	211	25	0.118483	0.103306	GO:1903039	GO:BP	positive regulation of leukocyte cell-cell adhesion	21100	26152	c("GO:0007159", "GO:0022409", "GO:1903037")
query_1	TRUE	5.10365e-15	7399	211	136	0.64455	0.0183809	GO:0051716	GO:BP	cellular response to stimulus	21100	16064	c("GO:0009987", "GO:0050896")
query_1	TRUE	7.80151e-15	221	211	24	0.113744	0.108597	GO:0050870	GO:BP	positive regulation of T cell activation	21100	15389	c("GO:0042110", "GO:0050863", "GO:0051251", "GO:1903039")
query_1	TRUE	1.12232e-14	938	211	44	0.208531	0.0469083	GO:0048534	GO:BP	hematopoietic or lymphoid organ development	21100	14854	c("GO:0002520", "GO:0048513")
query_1	TRUE	1.57313e-14	309	211	27	0.127962	0.0873786	GO:0006909	GO:BP	phagocytosis	21100	2849	GO:0016192
query_1	TRUE	1.73017e-14	1489	211	55	0.260664	0.0369375	GO:0007155	GO:BP	cell adhesion	21100	3055	GO:0009987
query_1	TRUE	1.74738e-14	2666	211	75	0.35545	0.028132	GO:0051239	GO:BP	regulation of multicellular organismal process	21100	15697	c("GO:0032501", "GO:0050789")
query_1	TRUE	2.38904e-14	440	211	31	0.146919	0.0704545	GO:1903131	GO:BP	mononuclear cell differentiation	21100	26236	GO:0002521
query_1	TRUE	2.97324e-14	288	211	26	0.123223	0.0902778	GO:0022409	GO:BP	positive regulation of cell-cell adhesion	21100	7584	c("GO:0022407", "GO:0045785", "GO:0098609")
query_1	TRUE	5.37268e-14	419	211	30	0.14218	0.071599	GO:0002683	GO:BP	negative regulation of immune system process	21100	1324	c("GO:0002376", "GO:0002682", "GO:0048519")
query_1	TRUE	5.87109e-14	241	211	24	0.113744	0.0995851	GO:0002699	GO:BP	positive regulation of immune effector process	21100	1340	c("GO:0002252", "GO:0002684", "GO:0002697")
query_1	TRUE	6.90111e-14	298	211	26	0.123223	0.0872483	GO:0046651	GO:BP	lymphocyte proliferation	21100	14266	c("GO:0032943", "GO:0046649")
query_1	TRUE	7.42659e-14	391	211	29	0.137441	0.0741688	GO:0030098	GO:BP	lymphocyte differentiation	21100	7701	c("GO:0046649", "GO:1903131")
query_1	TRUE	8.93032e-14	3010	211	79	0.374408	0.0262458	GO:0010033	GO:BP	response to organic substance	21100	4307	GO:0042221
query_1	TRUE	9.5774e-14	302	211	26	0.123223	0.0860927	GO:0032943	GO:BP	mononuclear cell proliferation	21100	9134	GO:0070661
query_1	TRUE	1.05309e-13	364	211	28	0.132701	0.0769231	GO:0002831	GO:BP	regulation of response to biotic stimulus	21100	1465	c("GO:0009607", "GO:0048583")
query_1	TRUE	1.45032e-13	913	211	42	0.199052	0.0460022	GO:0098609	GO:BP	cell-cell adhesion	21100	22001	GO:0007155
query_1	TRUE	1.97189e-13	254	211	24	0.113744	0.0944882	GO:0070663	GO:BP	regulation of leukocyte proliferation	21100	18996	c("GO:0042127", "GO:0070661")
query_1	TRUE	2.12412e-13	13001	211	184	0.872038	0.0141528	GO:0065007	GO:BP	biological regulation	21100	18612	GO:0008150
query_1	TRUE	3.53751e-13	12276	211	178	0.843602	0.0144998	GO:0050789	GO:BP	regulation of biological process	21100	15321	c("GO:0008150", "GO:0065007")
query_1	TRUE	3.68729e-13	350	211	27	0.127962	0.0771429	GO:0002460	GO:BP	adaptive immune response based on somatic recombination of immune receptors built from immunoglobulin superfamily domains	21100	1106	GO:0002250
query_1	TRUE	4.20322e-13	384	211	28	0.132701	0.0729167	GO:0050900	GO:BP	leukocyte migration	21100	15413	c("GO:0002376", "GO:0016477")
query_1	TRUE	4.85697e-13	899	211	41	0.194313	0.0456062	GO:0030097	GO:BP	hemopoiesis	21100	7700	GO:0048534
query_1	TRUE	1.02557e-12	245	211	23	0.109005	0.0938776	GO:0045088	GO:BP	regulation of innate immune response	21100	13118	c("GO:0002831", "GO:0031347", "GO:0032101", "GO:0045087", "GO:0050776")
query_1	TRUE	2.56859e-12	228	211	22	0.104265	0.0964912	GO:0097529	GO:BP	myeloid leukocyte migration	21100	21870	GO:0050900
query_1	TRUE	2.81707e-12	229	211	22	0.104265	0.0960699	GO:0002703	GO:BP	regulation of leukocyte mediated immunity	21100	1344	c("GO:0002443", "GO:0002697")
query_1	TRUE	3.86453e-12	206	211	21	0.0995261	0.101942	GO:0042098	GO:BP	T cell proliferation	21100	11533	c("GO:0042110", "GO:0046651")
query_1	TRUE	3.87517e-12	181	211	20	0.0947867	0.110497	GO:0001906	GO:BP	cell killing	21100	640	GO:0009987
query_1	TRUE	4.98421e-12	1312	211	48	0.227488	0.0365854	GO:0080134	GO:BP	regulation of response to stress	21100	20874	c("GO:0006950", "GO:0048583")
query_1	TRUE	9.45546e-12	2391	211	66	0.312796	0.0276035	GO:0071310	GO:BP	cellular response to organic substance	21100	19341	c("GO:0010033", "GO:0070887")
query_1	TRUE	9.64807e-12	1958	211	59	0.279621	0.0301328	GO:0008283	GO:BP	cell population proliferation	21100	3567	GO:0009987
query_1	TRUE	1.82245e-11	196	211	20	0.0947867	0.102041	GO:0002833	GO:BP	positive regulation of response to biotic stimulus	21100	1467	c("GO:0002831", "GO:0009607", "GO:0048584")
query_1	TRUE	2.14023e-11	149	211	18	0.0853081	0.120805	GO:0034341	GO:BP	response to interferon-gamma	21100	9853	c("GO:0034097", "GO:0045087")
query_1	TRUE	3.25954e-11	229	211	21	0.0995261	0.0917031	GO:0002274	GO:BP	myeloid leukocyte activation	21100	929	GO:0045321
query_1	TRUE	3.32269e-11	1658	211	53	0.251185	0.0319662	GO:0042127	GO:BP	regulation of cell population proliferation	21100	11549	c("GO:0008283", "GO:0050794")
query_1	TRUE	3.87779e-11	231	211	21	0.0995261	0.0909091	GO:0050670	GO:BP	regulation of lymphocyte proliferation	21100	15256	c("GO:0032944", "GO:0046651", "GO:0051249")
query_1	TRUE	4.0317e-11	92	211	15	0.07109	0.163043	GO:0030101	GO:BP	natural killer cell activation	21100	7704	GO:0046649
query_1	TRUE	4.22353e-11	389	211	26	0.123223	0.066838	GO:0009615	GO:BP	response to virus	21100	3986	GO:0051707
query_1	TRUE	4.74047e-11	748	211	35	0.165877	0.0467914	GO:0009617	GO:BP	response to bacterium	21100	3988	GO:0051707
query_1	TRUE	4.83602e-11	156	211	18	0.0853081	0.115385	GO:0045089	GO:BP	positive regulation of innate immune response	21100	13119	c("GO:0002833", "GO:0031349", "GO:0032103", "GO:0045087", "GO:0045088", "GO:0050778")
query_1	TRUE	5.01563e-11	234	211	21	0.0995261	0.0897436	GO:0032944	GO:BP	regulation of mononuclear cell proliferation	21100	9135	c("GO:0032943", "GO:0070663")
query_1	TRUE	5.63169e-11	3019	211	74	0.350711	0.0245114	GO:0070887	GO:BP	cellular response to chemical stimulus	21100	19115	c("GO:0042221", "GO:0051716")
query_1	TRUE	5.94164e-11	236	211	21	0.0995261	0.0889831	GO:0030595	GO:BP	leukocyte chemotaxis	21100	7918	c("GO:0050900", "GO:0060326")
query_1	TRUE	6.91588e-11	267	211	22	0.104265	0.082397	GO:0030217	GO:BP	T cell differentiation	21100	7756	c("GO:0030098", "GO:0042110")
query_1	TRUE	9.18907e-11	1000	211	40	0.189573	0.04	GO:0051241	GO:BP	negative regulation of multicellular organismal process	21100	15699	c("GO:0032501", "GO:0048519", "GO:0051239")
query_1	TRUE	1.13808e-10	442	211	27	0.127962	0.061086	GO:0045785	GO:BP	positive regulation of cell adhesion	21100	13511	c("GO:0007155", "GO:0030155", "GO:0048522")
query_1	TRUE	1.24633e-10	99	211	15	0.07109	0.151515	GO:0050764	GO:BP	regulation of phagocytosis	21100	15301	c("GO:0006909", "GO:0060627")
query_1	TRUE	1.76383e-10	311	211	23	0.109005	0.073955	GO:0060326	GO:BP	cell chemotaxis	21100	17101	c("GO:0006935", "GO:0016477", "GO:0070887")
query_1	TRUE	2.35269e-10	2425	211	64	0.303318	0.0263918	GO:0050793	GO:BP	regulation of developmental process	21100	15324	c("GO:0032502", "GO:0050789")
query_1	TRUE	2.64987e-10	1135	211	42	0.199052	0.0370044	GO:0010628	GO:BP	positive regulation of gene expression	21100	4773	c("GO:0010467", "GO:0010468", "GO:0010604")
query_1	TRUE	2.68628e-10	198	211	19	0.0900474	0.0959596	GO:0071674	GO:BP	mononuclear cell migration	21100	19658	GO:0050900
query_1	TRUE	3.06107e-10	126	211	16	0.0758294	0.126984	GO:0001909	GO:BP	leukocyte mediated cytotoxicity	21100	642	c("GO:0001906", "GO:0002443")
query_1	TRUE	3.93316e-10	128	211	16	0.0758294	0.125	GO:0071346	GO:BP	cellular response to interferon-gamma	21100	19375	c("GO:0034341", "GO:0071345")
query_1	TRUE	3.96673e-10	70	211	13	0.0616114	0.185714	GO:0050766	GO:BP	positive regulation of phagocytosis	21100	15303	c("GO:0006909", "GO:0050764", "GO:0051050")
query_1	TRUE	4.18316e-10	324	211	23	0.109005	0.0709877	GO:0032496	GO:BP	response to lipopolysaccharide	21100	8799	c("GO:0002237", "GO:0033993", "GO:1901700")
query_1	TRUE	4.33537e-10	261	211	21	0.0995261	0.0804598	GO:0050851	GO:BP	antigen receptor-mediated signaling pathway	21100	15370	GO:0002429
query_1	TRUE	4.45092e-10	129	211	16	0.0758294	0.124031	GO:0071621	GO:BP	granulocyte chemotaxis	21100	19612	c("GO:0030595", "GO:0097530")
query_1	TRUE	4.75111e-10	4336	211	90	0.42654	0.0207565	GO:0042221	GO:BP	response to chemical	21100	11621	GO:0050896
query_1	TRUE	6.73169e-10	156	211	17	0.0805687	0.108974	GO:0097530	GO:BP	granulocyte migration	21100	21871	GO:0097529
query_1	TRUE	1.29585e-09	342	211	23	0.109005	0.0672515	GO:0002237	GO:BP	response to molecule of bacterial origin	21100	893	c("GO:0009617", "GO:0010033", "GO:0043207")
query_1	TRUE	1.6555e-09	61	211	12	0.056872	0.196721	GO:0032655	GO:BP	regulation of interleukin-12 production	21100	8900	c("GO:0001817", "GO:0032615")
query_1	TRUE	1.6555e-09	61	211	12	0.056872	0.196721	GO:0032615	GO:BP	interleukin-12 production	21100	8860	GO:0001816
query_1	TRUE	2.2536e-09	1604	211	49	0.232227	0.0305486	GO:0016192	GO:BP	vesicle-mediated transport	21100	5742	GO:0006810
query_1	TRUE	2.39694e-09	285	211	21	0.0995261	0.0736842	GO:0002366	GO:BP	leukocyte activation involved in immune response	21100	1021	c("GO:0002263", "GO:0045321")
query_1	TRUE	2.84744e-09	2629	211	65	0.308057	0.0247242	GO:0035556	GO:BP	intracellular signal transduction	21100	10463	GO:0007165
query_1	TRUE	2.92691e-09	3776	211	81	0.383886	0.0214513	GO:0009893	GO:BP	positive regulation of metabolic process	21100	4213	c("GO:0008152", "GO:0019222", "GO:0048518")
query_1	TRUE	2.93309e-09	288	211	21	0.0995261	0.0729167	GO:1902105	GO:BP	regulation of leukocyte differentiation	21100	25355	c("GO:0002521", "GO:0045595", "GO:1903706")
query_1	TRUE	2.98684e-09	1918	211	54	0.255924	0.0281543	GO:0012501	GO:BP	programmed cell death	21100	5116	GO:0008219
query_1	TRUE	3.13552e-09	289	211	21	0.0995261	0.0726644	GO:0002263	GO:BP	cell activation involved in immune response	21100	918	c("GO:0001775", "GO:0002252", "GO:0006955")
query_1	TRUE	4.45176e-09	175	211	17	0.0805687	0.0971429	GO:0042129	GO:BP	regulation of T cell proliferation	21100	11551	c("GO:0042098", "GO:0050670", "GO:0050863")
query_1	TRUE	5.50578e-09	2074	211	56	0.265403	0.027001	GO:0008219	GO:BP	cell death	21100	3560	GO:0009987
query_1	TRUE	8.61903e-09	531	211	27	0.127962	0.0508475	GO:0060627	GO:BP	regulation of vesicle-mediated transport	21100	17385	c("GO:0016192", "GO:0050794", "GO:0051049")
query_1	TRUE	9.65407e-09	157	211	16	0.0758294	0.101911	GO:0070665	GO:BP	positive regulation of leukocyte proliferation	21100	18998	c("GO:0008284", "GO:0070661", "GO:0070663")
query_1	TRUE	1.06482e-08	158	211	16	0.0758294	0.101266	GO:0046631	GO:BP	alpha-beta T cell activation	21100	14247	GO:0042110
query_1	TRUE	1.11479e-08	71	211	12	0.056872	0.169014	GO:0042267	GO:BP	natural killer cell mediated cytotoxicity	21100	11640	c("GO:0001909", "GO:0002228")
query_1	TRUE	1.43113e-08	2725	211	65	0.308057	0.0238532	GO:0032879	GO:BP	regulation of localization	21100	9081	c("GO:0050789", "GO:0051179")
query_1	TRUE	1.53745e-08	1691	211	49	0.232227	0.0289769	GO:1902531	GO:BP	regulation of intracellular signal transduction	21100	25711	c("GO:0009966", "GO:0035556")
query_1	TRUE	1.8613e-08	74	211	12	0.056872	0.162162	GO:0002228	GO:BP	natural killer cell mediated immunity	21100	884	c("GO:0002449", "GO:0045087")
query_1	TRUE	1.94518e-08	318	211	21	0.0995261	0.0660377	GO:0006959	GO:BP	humoral immune response	21100	2892	GO:0006955
query_1	TRUE	2.07071e-08	3465	211	75	0.35545	0.021645	GO:0010604	GO:BP	positive regulation of macromolecule metabolic process	21100	4750	c("GO:0009893", "GO:0043170", "GO:0060255")
query_1	TRUE	2.24023e-08	2345	211	59	0.279621	0.0251599	GO:0050790	GO:BP	regulation of catalytic activity	21100	15322	GO:0065009
query_1	TRUE	2.34591e-08	287	211	20	0.0947867	0.0696864	GO:0006874	GO:BP	cellular calcium ion homeostasis	21100	2817	c("GO:0006875", "GO:0055074", "GO:0072503")
query_1	TRUE	2.99255e-08	169	211	16	0.0758294	0.0946746	GO:0002706	GO:BP	regulation of lymphocyte mediated immunity	21100	1347	c("GO:0002449", "GO:0002703")
query_1	TRUE	3.93171e-08	262	211	19	0.0900474	0.0725191	GO:0034612	GO:BP	response to tumor necrosis factor	21100	9980	GO:0034097
query_1	TRUE	4.22949e-08	613	211	28	0.132701	0.045677	GO:0006935	GO:BP	chemotaxis	21100	2873	c("GO:0042221", "GO:0042330")
query_1	TRUE	4.36515e-08	1865	211	51	0.241706	0.0273458	GO:0006915	GO:BP	apoptotic process	21100	2855	GO:0012501
query_1	TRUE	4.56388e-08	615	211	28	0.132701	0.0455285	GO:0042330	GO:BP	taxis	21100	11671	c("GO:0009605", "GO:0040011")
query_1	TRUE	4.8008e-08	123	211	14	0.0663507	0.113821	GO:0002688	GO:BP	regulation of leukocyte chemotaxis	21100	1329	c("GO:0002685", "GO:0030595", "GO:0050920")
query_1	TRUE	5.2062e-08	2947	211	67	0.317536	0.022735	GO:0009966	GO:BP	regulation of signal transduction	21100	4266	c("GO:0007165", "GO:0010646", "GO:0023051", "GO:0048583")
query_1	TRUE	5.36461e-08	124	211	14	0.0663507	0.112903	GO:0051209	GO:BP	release of sequestered calcium ion into cytosol	21100	15673	c("GO:0051283", "GO:0097553")
query_1	TRUE	5.98853e-08	125	211	14	0.0663507	0.112	GO:0051283	GO:BP	negative regulation of sequestering of calcium ion	21100	15731	c("GO:0048523", "GO:0051208", "GO:0051282")
query_1	TRUE	6.62676e-08	1461	211	44	0.208531	0.0301164	GO:0016477	GO:BP	cell migration	21100	5816	GO:0048870
query_1	TRUE	7.44027e-08	127	211	14	0.0663507	0.110236	GO:0051282	GO:BP	regulation of sequestering of calcium ion	21100	15730	c("GO:0032879", "GO:0050794", "GO:0051208")
query_1	TRUE	8.34984e-08	3050	211	68	0.322275	0.0222951	GO:0065009	GO:BP	regulation of molecular function	21100	18614	GO:0065007
query_1	TRUE	8.91076e-08	309	211	20	0.0947867	0.0647249	GO:0055074	GO:BP	calcium ion homeostasis	21100	16779	c("GO:0055065", "GO:0072507")
query_1	TRUE	8.99449e-08	211	211	17	0.0805687	0.0805687	GO:0050866	GO:BP	negative regulation of cell activation	21100	15385	c("GO:0001775", "GO:0048523", "GO:0050865")
query_1	TRUE	9.1303e-08	1655	211	47	0.222749	0.0283988	GO:0048870	GO:BP	cell motility	21100	15159	c("GO:0006928", "GO:0040011", "GO:0051674")
query_1	TRUE	9.1303e-08	1655	211	47	0.222749	0.0283988	GO:0051674	GO:BP	localization of cell	21100	16030	c("GO:0009987", "GO:0051179")
query_1	TRUE	9.20824e-08	129	211	14	0.0663507	0.108527	GO:1990266	GO:BP	neutrophil migration	21100	28915	GO:0097530
query_1	TRUE	9.70351e-08	106	211	13	0.0616114	0.122642	GO:0002456	GO:BP	T cell mediated immunity	21100	1102	c("GO:0002449", "GO:0002460")
query_1	TRUE	9.70351e-08	106	211	13	0.0616114	0.122642	GO:0030593	GO:BP	neutrophil chemotaxis	21100	7917	c("GO:0071621", "GO:1990266")
query_1	TRUE	9.88001e-08	423	211	23	0.109005	0.0543735	GO:0006816	GO:BP	calcium ion transport	21100	2772	GO:0030001
query_1	TRUE	1.09675e-07	278	211	19	0.0900474	0.0683453	GO:0001818	GO:BP	negative regulation of cytokine production	21100	587	c("GO:0001816", "GO:0001817", "GO:0010629", "GO:0051241")
query_1	TRUE	1.13537e-07	131	211	14	0.0663507	0.10687	GO:0051208	GO:BP	sequestering of calcium ion	21100	15672	c("GO:0006874", "GO:0051651")
query_1	TRUE	1.39484e-07	133	211	14	0.0663507	0.105263	GO:0002705	GO:BP	positive regulation of leukocyte mediated immunity	21100	1346	c("GO:0002443", "GO:0002699", "GO:0002703")
query_1	TRUE	1.40069e-07	217	211	17	0.0805687	0.078341	GO:0002685	GO:BP	regulation of leukocyte migration	21100	1326	c("GO:0002682", "GO:0030334", "GO:0050900")
query_1	TRUE	1.54129e-07	88	211	12	0.056872	0.136364	GO:0070098	GO:BP	chemokine-mediated signaling pathway	21100	18639	c("GO:0019221", "GO:1990869")
query_1	TRUE	1.6286e-07	189	211	16	0.0758294	0.0846561	GO:0002695	GO:BP	negative regulation of leukocyte activation	21100	1336	c("GO:0002683", "GO:0002694", "GO:0045321", "GO:0050866")
query_1	TRUE	1.80058e-07	896	211	33	0.156398	0.0368304	GO:0051050	GO:BP	positive regulation of transport	21100	15541	c("GO:0006810", "GO:0048518", "GO:0051049")
query_1	TRUE	2.0245e-07	6436	211	109	0.516588	0.016936	GO:0051179	GO:BP	localization	21100	15648	GO:0008150
query_1	TRUE	2.07826e-07	324	211	20	0.0947867	0.0617284	GO:0072503	GO:BP	cellular divalent inorganic cation homeostasis	21100	20303	c("GO:0030003", "GO:0072507")
query_1	TRUE	2.35674e-07	165	211	15	0.07109	0.0909091	GO:0097553	GO:BP	calcium ion transmembrane import into cytosol	21100	21882	GO:0070588
query_1	TRUE	2.35674e-07	165	211	15	0.07109	0.0909091	GO:1903555	GO:BP	regulation of tumor necrosis factor superfamily cytokine production	21100	26608	c("GO:0001817", "GO:0071706")
query_1	TRUE	2.35674e-07	165	211	15	0.07109	0.0909091	GO:0071706	GO:BP	tumor necrosis factor superfamily cytokine production	21100	19685	GO:0001816
query_1	TRUE	2.46511e-07	1345	211	41	0.194313	0.0304833	GO:2000026	GO:BP	regulation of multicellular organismal development	21100	29251	c("GO:0007275", "GO:0050793", "GO:0051239")
query_1	TRUE	2.65035e-07	1833	211	49	0.232227	0.0267321	GO:0040011	GO:BP	locomotion	21100	11458	GO:0008150
query_1	TRUE	3.03009e-07	295	211	19	0.0900474	0.0644068	GO:0051607	GO:BP	defense response to virus	21100	15969	c("GO:0009615", "GO:0140546")
query_1	TRUE	3.07107e-07	141	211	14	0.0663507	0.0992908	GO:0050671	GO:BP	positive regulation of lymphocyte proliferation	21100	15257	c("GO:0032946", "GO:0046651", "GO:0050670", "GO:0051251")
query_1	TRUE	3.07399e-07	116	211	13	0.0616114	0.112069	GO:0071675	GO:BP	regulation of mononuclear cell migration	21100	19659	c("GO:0002685", "GO:0071674")
query_1	TRUE	3.20976e-07	296	211	19	0.0900474	0.0641892	GO:0140546	GO:BP	defense response to symbiont	21100	23148	GO:0098542
query_1	TRUE	3.71112e-07	143	211	14	0.0663507	0.0979021	GO:0032946	GO:BP	positive regulation of mononuclear cell proliferation	21100	9137	c("GO:0032943", "GO:0032944", "GO:0070665")
query_1	TRUE	3.83435e-07	975	211	34	0.161137	0.0348718	GO:1902533	GO:BP	positive regulation of intracellular signal transduction	21100	25713	c("GO:0009967", "GO:0035556", "GO:1902531")
query_1	TRUE	3.99171e-07	374	211	21	0.0995261	0.0561497	GO:1903706	GO:BP	regulation of hemopoiesis	21100	26755	c("GO:0002682", "GO:0030097", "GO:2000026")
query_1	TRUE	4.94516e-07	97	211	12	0.056872	0.123711	GO:1990868	GO:BP	response to chemokine	21100	29165	GO:0034097
query_1	TRUE	4.94516e-07	97	211	12	0.056872	0.123711	GO:1990869	GO:BP	cellular response to chemokine	21100	29166	c("GO:0071345", "GO:1990868")
query_1	TRUE	5.96981e-07	3336	211	70	0.331754	0.0209832	GO:0010646	GO:BP	regulation of cell communication	21100	4791	c("GO:0007154", "GO:0050794")
query_1	TRUE	6.43349e-07	149	211	14	0.0663507	0.0939597	GO:0050852	GO:BP	T cell receptor signaling pathway	21100	15371	GO:0050851
query_1	TRUE	6.50094e-07	788	211	30	0.14218	0.0380711	GO:0000165	GO:BP	MAPK cascade	21100	72	GO:0035556
query_1	TRUE	6.57217e-07	1882	211	49	0.232227	0.0260361	GO:0016310	GO:BP	phosphorylation	21100	5776	GO:0006796
query_1	TRUE	7.1864e-07	1513	211	43	0.203791	0.0284204	GO:0009967	GO:BP	positive regulation of signal transduction	21100	4267	c("GO:0007165", "GO:0009966", "GO:0010647", "GO:0023056", "GO:0048584")
query_1	TRUE	7.29744e-07	3351	211	70	0.331754	0.0208893	GO:0023051	GO:BP	regulation of signaling	21100	7647	c("GO:0023052", "GO:0050789")
query_1	TRUE	7.68894e-07	242	211	17	0.0805687	0.0702479	GO:0071356	GO:BP	cellular response to tumor necrosis factor	21100	19385	c("GO:0034612", "GO:0071345")
query_1	TRUE	8.38706e-07	4856	211	89	0.421801	0.0183278	GO:0048523	GO:BP	negative regulation of cellular process	21100	14845	c("GO:0009987", "GO:0048519", "GO:0050794")
query_1	TRUE	9.36016e-07	1587	211	44	0.208531	0.0277253	GO:0006468	GO:BP	protein phosphorylation	21100	2446	c("GO:0006464", "GO:0016310")
query_1	TRUE	9.36185e-07	1711	211	46	0.218009	0.0268849	GO:0010647	GO:BP	positive regulation of cell communication	21100	4792	c("GO:0007154", "GO:0010646", "GO:0048522")
query_1	TRUE	9.84822e-07	563	211	25	0.118483	0.044405	GO:0040017	GO:BP	positive regulation of locomotion	21100	11464	c("GO:0040011", "GO:0040012", "GO:0048518")
query_1	TRUE	9.89871e-07	354	211	20	0.0947867	0.0564972	GO:0072507	GO:BP	divalent inorganic cation homeostasis	21100	20307	c("GO:0055080", "GO:0098771")
query_1	TRUE	9.98311e-07	154	211	14	0.0663507	0.0909091	GO:0045580	GO:BP	regulation of T cell differentiation	21100	13312	c("GO:0030217", "GO:0045619", "GO:0050863")
query_1	TRUE	1.00987e-06	1715	211	46	0.218009	0.0268222	GO:0023056	GO:BP	positive regulation of signaling	21100	7652	c("GO:0023051", "GO:0023052", "GO:0048518")
query_1	TRUE	1.01652e-06	183	211	15	0.07109	0.0819672	GO:0002819	GO:BP	regulation of adaptive immune response	21100	1453	c("GO:0002250", "GO:0050776")
query_1	TRUE	1.0648e-06	128	211	13	0.0616114	0.101562	GO:0050853	GO:BP	B cell receptor signaling pathway	21100	15372	GO:0050851
query_1	TRUE	1.10417e-06	62	211	10	0.0473934	0.16129	GO:0031343	GO:BP	positive regulation of cell killing	21100	8274	c("GO:0001906", "GO:0031341", "GO:0048522")
query_1	TRUE	1.14692e-06	357	211	20	0.0947867	0.0560224	GO:0050727	GO:BP	regulation of inflammatory response	21100	15278	c("GO:0006954", "GO:0031347", "GO:0032101")
query_1	TRUE	1.18348e-06	185	211	15	0.07109	0.0810811	GO:0045619	GO:BP	regulation of lymphocyte differentiation	21100	13351	c("GO:0030098", "GO:0051249", "GO:1902105")
query_1	TRUE	1.19387e-06	249	211	17	0.0805687	0.0682731	GO:0051924	GO:BP	regulation of calcium ion transport	21100	16186	c("GO:0006816", "GO:0010959")
query_1	TRUE	1.49879e-06	32	211	8	0.0379147	0.25	GO:0002507	GO:BP	tolerance induction	21100	1152	c("GO:0002376", "GO:0002520")
query_1	TRUE	1.65584e-06	221	211	16	0.0758294	0.0723982	GO:0050920	GO:BP	regulation of chemotaxis	21100	15433	c("GO:0006935", "GO:0032101", "GO:0040012")
query_1	TRUE	1.65593e-06	160	211	14	0.0663507	0.0875	GO:0051250	GO:BP	negative regulation of lymphocyte activation	21100	15705	c("GO:0002695", "GO:0046649", "GO:0051249")
query_1	TRUE	1.65593e-06	160	211	14	0.0663507	0.0875	GO:0032640	GO:BP	tumor necrosis factor production	21100	8885	GO:0071706
query_1	TRUE	1.65593e-06	160	211	14	0.0663507	0.0875	GO:0032680	GO:BP	regulation of tumor necrosis factor production	21100	8925	c("GO:0032640", "GO:1903555")
query_1	TRUE	2.68758e-06	112	211	12	0.056872	0.107143	GO:0002708	GO:BP	positive regulation of lymphocyte mediated immunity	21100	1349	c("GO:0002449", "GO:0002705", "GO:0002706")
query_1	TRUE	2.83425e-06	68	211	10	0.0473934	0.147059	GO:0002548	GO:BP	monocyte chemotaxis	21100	1192	c("GO:0030595", "GO:0071674", "GO:0097529")
query_1	TRUE	2.83795e-06	337	211	19	0.0900474	0.0563798	GO:0042113	GO:BP	B cell activation	21100	11539	GO:0046649
query_1	TRUE	2.84836e-06	547	211	24	0.113744	0.0438757	GO:2000147	GO:BP	positive regulation of cell motility	21100	29371	c("GO:0040017", "GO:0048870", "GO:0051272", "GO:2000145")
query_1	TRUE	2.98886e-06	418	211	21	0.0995261	0.0502392	GO:0006875	GO:BP	cellular metal ion homeostasis	21100	2818	c("GO:0030003", "GO:0055065")
query_1	TRUE	3.14562e-06	168	211	14	0.0663507	0.0833333	GO:0002822	GO:BP	regulation of adaptive immune response based on somatic recombination of immune receptors built from immunoglobulin superfamily domains	21100	1456	c("GO:0002460", "GO:0002819")
query_1	TRUE	4.58571e-06	93	211	11	0.0521327	0.11828	GO:0002275	GO:BP	myeloid cell activation involved in immune response	21100	930	c("GO:0002274", "GO:0002366")
query_1	TRUE	4.68619e-06	561	211	24	0.113744	0.0427807	GO:0051272	GO:BP	positive regulation of cellular component movement	21100	15721	c("GO:0006928", "GO:0048522", "GO:0051270")
query_1	TRUE	5.0204e-06	5876	211	99	0.469194	0.0168482	GO:0048519	GO:BP	negative regulation of biological process	21100	14841	c("GO:0008150", "GO:0050789")
query_1	TRUE	5.77205e-06	95	211	11	0.0521327	0.115789	GO:0002690	GO:BP	positive regulation of leukocyte chemotaxis	21100	1331	c("GO:0002687", "GO:0002688", "GO:0030595", "GO:0050921")
query_1	TRUE	5.98195e-06	120	211	12	0.056872	0.1	GO:0051928	GO:BP	positive regulation of calcium ion transport	21100	16190	c("GO:0006816", "GO:0043270", "GO:0051924")
query_1	TRUE	6.14128e-06	523	211	23	0.109005	0.0439771	GO:0030335	GO:BP	positive regulation of cell migration	21100	7814	c("GO:0016477", "GO:0030334", "GO:2000147")
query_1	TRUE	6.14883e-06	664	211	26	0.123223	0.0391566	GO:0043408	GO:BP	regulation of MAPK cascade	21100	12298	c("GO:0000165", "GO:1902531")
query_1	TRUE	6.46245e-06	96	211	11	0.0521327	0.114583	GO:0031341	GO:BP	regulation of cell killing	21100	8272	c("GO:0001906", "GO:0050794")
query_1	TRUE	7.62636e-06	929	211	31	0.146919	0.0333692	GO:0008284	GO:BP	positive regulation of cell population proliferation	21100	3568	c("GO:0008283", "GO:0042127", "GO:0048522")
query_1	TRUE	7.70884e-06	3768	211	73	0.345972	0.0193737	GO:0065008	GO:BP	regulation of biological quality	21100	18613	GO:0065007
query_1	TRUE	8.37338e-06	879	211	30	0.14218	0.0341297	GO:0033993	GO:BP	response to lipid	21100	9631	GO:0010033
query_1	TRUE	9.57103e-06	183	211	14	0.0663507	0.0765027	GO:0050777	GO:BP	negative regulation of immune response	21100	15314	c("GO:0002683", "GO:0006955", "GO:0048585", "GO:0050776")
query_1	TRUE	9.84716e-06	491	211	22	0.104265	0.0448065	GO:0030003	GO:BP	cellular cation homeostasis	21100	7667	c("GO:0006873", "GO:0055080")
query_1	TRUE	1.13346e-05	1170	211	35	0.165877	0.0299145	GO:0043085	GO:BP	positive regulation of catalytic activity	21100	12129	c("GO:0044093", "GO:0050790")
query_1	TRUE	1.19859e-05	1724	211	44	0.208531	0.025522	GO:0051049	GO:BP	regulation of transport	21100	15540	c("GO:0006810", "GO:0032879")
query_1	TRUE	1.23899e-05	102	211	11	0.0521327	0.107843	GO:0042102	GO:BP	positive regulation of T cell proliferation	21100	11535	c("GO:0042098", "GO:0042129", "GO:0050671", "GO:0050870")
query_1	TRUE	1.27643e-05	79	211	10	0.0473934	0.126582	GO:0038093	GO:BP	Fc receptor signaling pathway	21100	11177	GO:0002768
query_1	TRUE	1.35664e-05	27	211	7	0.0331754	0.259259	GO:0045954	GO:BP	positive regulation of natural killer cell mediated cytotoxicity	21100	13660	c("GO:0001912", "GO:0002717", "GO:0042267", "GO:0042269")
query_1	TRUE	1.3751e-05	103	211	11	0.0521327	0.106796	GO:1903557	GO:BP	positive regulation of tumor necrosis factor superfamily cytokine production	21100	26610	c("GO:0001819", "GO:0071706", "GO:1903555")
query_1	TRUE	1.4562e-05	222	211	15	0.07109	0.0675676	GO:0051651	GO:BP	maintenance of location in cell	21100	16010	c("GO:0009987", "GO:0051235", "GO:0051641")
query_1	TRUE	1.66617e-05	160	211	13	0.0616114	0.08125	GO:1903708	GO:BP	positive regulation of hemopoiesis	21100	26757	c("GO:0002684", "GO:0030097", "GO:0051094", "GO:0051240", "GO:1903706")
query_1	TRUE	1.66617e-05	160	211	13	0.0616114	0.08125	GO:1902107	GO:BP	positive regulation of leukocyte differentiation	21100	25357	c("GO:0002521", "GO:0045597", "GO:1902105", "GO:1903708")
query_1	TRUE	1.69927e-05	506	211	22	0.104265	0.0434783	GO:0006873	GO:BP	cellular ion homeostasis	21100	2816	c("GO:0050801", "GO:0055082")
query_1	TRUE	1.79828e-05	2781	211	59	0.279621	0.0212154	GO:0006796	GO:BP	phosphate-containing compound metabolic process	21100	2752	GO:0006793
query_1	TRUE	2.02893e-05	511	211	22	0.104265	0.0430528	GO:0055065	GO:BP	metal ion homeostasis	21100	16770	c("GO:0055080", "GO:0098771")
query_1	TRUE	2.103e-05	17	211	6	0.028436	0.352941	GO:0032695	GO:BP	negative regulation of interleukin-12 production	21100	8940	c("GO:0001818", "GO:0032615", "GO:0032655")
query_1	TRUE	2.16195e-05	62	211	9	0.042654	0.145161	GO:0032663	GO:BP	regulation of interleukin-2 production	21100	8908	c("GO:0001817", "GO:0032623")
query_1	TRUE	2.16195e-05	62	211	9	0.042654	0.145161	GO:0032623	GO:BP	interleukin-2 production	21100	8868	GO:0001816
query_1	TRUE	2.34234e-05	84	211	10	0.0473934	0.119048	GO:0002709	GO:BP	regulation of T cell mediated immunity	21100	1350	c("GO:0002456", "GO:0002706", "GO:0002822")
query_1	TRUE	2.40774e-05	2803	211	59	0.279621	0.0210489	GO:0006793	GO:BP	phosphorus metabolic process	21100	2749	GO:0044237
query_1	TRUE	2.51065e-05	109	211	11	0.0521327	0.100917	GO:0045621	GO:BP	positive regulation of lymphocyte differentiation	21100	13353	c("GO:0030098", "GO:0045619", "GO:0051251", "GO:1902107")
query_1	TRUE	2.88475e-05	64	211	9	0.042654	0.140625	GO:0050854	GO:BP	regulation of antigen receptor-mediated signaling pathway	21100	15373	c("GO:0009966", "GO:0050776", "GO:0050851")
query_1	TRUE	3.04299e-05	111	211	11	0.0521327	0.0990991	GO:0071887	GO:BP	leukocyte apoptotic process	21100	19787	GO:0006915
query_1	TRUE	3.29755e-05	46	211	8	0.0379147	0.173913	GO:0031295	GO:BP	T cell costimulation	21100	8248	c("GO:0031294", "GO:0050870")
query_1	TRUE	3.43369e-05	1592	211	41	0.194313	0.0257538	GO:0010941	GO:BP	regulation of cell death	21100	5062	c("GO:0008219", "GO:0050794")
query_1	TRUE	4.07384e-05	142	211	12	0.056872	0.084507	GO:0050921	GO:BP	positive regulation of chemotaxis	21100	15434	c("GO:0006935", "GO:0032103", "GO:0040017", "GO:0050920")
query_1	TRUE	4.10591e-05	579	211	23	0.109005	0.0397237	GO:0010942	GO:BP	positive regulation of cell death	21100	5063	c("GO:0008219", "GO:0010941", "GO:0048522")
query_1	TRUE	4.33812e-05	5754	211	95	0.450237	0.0165103	GO:0048856	GO:BP	anatomical structure development	21100	15146	GO:0032502
query_1	TRUE	4.50276e-05	4903	211	85	0.402844	0.0173363	GO:0051234	GO:BP	establishment of localization	21100	15692	GO:0051179
query_1	TRUE	4.62585e-05	207	211	14	0.0663507	0.0676329	GO:0071222	GO:BP	cellular response to lipopolysaccharide	21100	19257	c("GO:0032496", "GO:0071219", "GO:0071396", "GO:1901701")
query_1	TRUE	4.68774e-05	48	211	8	0.0379147	0.166667	GO:0031294	GO:BP	lymphocyte costimulation	21100	8247	c("GO:0002376", "GO:0051251")
query_1	TRUE	4.76728e-05	144	211	12	0.056872	0.0833333	GO:0002687	GO:BP	positive regulation of leukocyte migration	21100	1328	c("GO:0002684", "GO:0002685", "GO:0030335", "GO:0050900")
query_1	TRUE	4.77496e-05	4742	211	83	0.393365	0.0175032	GO:0006810	GO:BP	transport	21100	2766	GO:0051234
query_1	TRUE	4.92853e-05	32	211	7	0.0331754	0.21875	GO:0002717	GO:BP	positive regulation of natural killer cell mediated immunity	21100	1358	c("GO:0002228", "GO:0002708", "GO:0002715", "GO:0045089")
query_1	TRUE	5.02724e-05	1550	211	40	0.189573	0.0258065	GO:0045595	GO:BP	regulation of cell differentiation	21100	13327	c("GO:0030154", "GO:0050793", "GO:0050794")
query_1	TRUE	5.08427e-05	952	211	30	0.14218	0.0315126	GO:2000145	GO:BP	regulation of cell motility	21100	29369	c("GO:0040012", "GO:0048870", "GO:0051270")
query_1	TRUE	5.17326e-05	320	211	17	0.0805687	0.053125	GO:0070371	GO:BP	ERK1 and ERK2 cascade	21100	18823	GO:0000165
query_1	TRUE	5.28267e-05	587	211	23	0.109005	0.0391823	GO:0055080	GO:BP	cation homeostasis	21100	16784	GO:0050801
query_1	TRUE	5.56479e-05	146	211	12	0.056872	0.0821918	GO:0032675	GO:BP	regulation of interleukin-6 production	21100	8920	c("GO:0001817", "GO:0032635")
query_1	TRUE	5.56479e-05	146	211	12	0.056872	0.0821918	GO:0032635	GO:BP	interleukin-6 production	21100	8880	GO:0001816
query_1	TRUE	5.58816e-05	1556	211	40	0.189573	0.0257069	GO:0044093	GO:BP	positive regulation of molecular function	21100	12634	GO:0065009
query_1	TRUE	5.78856e-05	118	211	11	0.0521327	0.0932203	GO:0072676	GO:BP	lymphocyte migration	21100	20386	GO:0071674
query_1	TRUE	6.33922e-05	93	211	10	0.0473934	0.107527	GO:0032651	GO:BP	regulation of interleukin-1 beta production	21100	8896	c("GO:0032611", "GO:0032652")
query_1	TRUE	6.33922e-05	93	211	10	0.0473934	0.107527	GO:0032611	GO:BP	interleukin-1 beta production	21100	8856	GO:0032612
query_1	TRUE	6.97702e-05	596	211	23	0.109005	0.0385906	GO:0098771	GO:BP	inorganic ion homeostasis	21100	22088	GO:0050801
query_1	TRUE	7.75179e-05	1448	211	38	0.180095	0.0262431	GO:0043067	GO:BP	regulation of programmed cell death	21100	12124	c("GO:0010941", "GO:0012501")
query_1	TRUE	7.90741e-05	216	211	14	0.0663507	0.0648148	GO:0071219	GO:BP	cellular response to molecule of bacterial origin	21100	19254	c("GO:0002237", "GO:0071216")
query_1	TRUE	8.63696e-05	373	211	18	0.0853081	0.0482574	GO:0018108	GO:BP	peptidyl-tyrosine phosphorylation	21100	6001	c("GO:0006468", "GO:0018212")
query_1	TRUE	9.29274e-05	255	211	15	0.07109	0.0588235	GO:0050730	GO:BP	regulation of peptidyl-tyrosine phosphorylation	21100	15281	c("GO:0001932", "GO:0018108")
query_1	TRUE	9.38499e-05	153	211	12	0.056872	0.0784314	GO:0070555	GO:BP	response to interleukin-1	21100	18925	GO:0034097
query_1	TRUE	9.59928e-05	35	211	7	0.0331754	0.2	GO:0038094	GO:BP	Fc-gamma receptor signaling pathway	21100	11178	GO:0038093
query_1	TRUE	9.75069e-05	376	211	18	0.0853081	0.0478723	GO:0018212	GO:BP	peptidyl-tyrosine modification	21100	6092	GO:0018193
query_1	TRUE	0.000106394	610	211	23	0.109005	0.0377049	GO:0050801	GO:BP	ion homeostasis	21100	15330	GO:0048878
query_1	TRUE	0.000110252	713	211	25	0.118483	0.0350631	GO:0008285	GO:BP	negative regulation of cell population proliferation	21100	3569	c("GO:0008283", "GO:0042127", "GO:0048523")
query_1	TRUE	0.000111298	297	211	16	0.0758294	0.0538721	GO:0070372	GO:BP	regulation of ERK1 and ERK2 cascade	21100	18824	c("GO:0043408", "GO:0070371")
query_1	TRUE	0.00011454	188	211	13	0.0616114	0.0691489	GO:0050731	GO:BP	positive regulation of peptidyl-tyrosine phosphorylation	21100	15282	c("GO:0001934", "GO:0018108", "GO:0050730")
query_1	TRUE	0.000116036	99	211	10	0.0473934	0.10101	GO:0032760	GO:BP	positive regulation of tumor necrosis factor production	21100	9005	c("GO:0032640", "GO:0032680", "GO:1903557")
query_1	TRUE	0.000124696	518	211	21	0.0995261	0.0405405	GO:0043068	GO:BP	positive regulation of programmed cell death	21100	12125	c("GO:0010942", "GO:0012501", "GO:0043067")
query_1	TRUE	0.000126127	992	211	30	0.14218	0.0302419	GO:0051336	GO:BP	regulation of hydrolase activity	21100	15776	GO:0050790
query_1	TRUE	0.000134937	128	211	11	0.0521327	0.0859375	GO:0019882	GO:BP	antigen processing and presentation	21100	6995	GO:0002376
query_1	TRUE	0.000140636	101	211	10	0.0473934	0.0990099	GO:0042100	GO:BP	B cell proliferation	21100	11534	c("GO:0042113", "GO:0046651")
query_1	TRUE	0.000140782	997	211	30	0.14218	0.0300903	GO:0040012	GO:BP	regulation of locomotion	21100	11459	c("GO:0040011", "GO:0050789")
query_1	TRUE	0.000142453	55	211	8	0.0379147	0.145455	GO:0001912	GO:BP	positive regulation of leukocyte mediated cytotoxicity	21100	645	c("GO:0001909", "GO:0001910", "GO:0002705", "GO:0031343")
query_1	TRUE	0.000151043	77	211	9	0.042654	0.116883	GO:0043299	GO:BP	leukocyte degranulation	21100	12228	c("GO:0002252", "GO:0045055", "GO:0051649")
query_1	TRUE	0.000154024	2085	211	47	0.222749	0.022542	GO:0006928	GO:BP	movement of cell or subcellular component	21100	2866	GO:0009987
query_1	TRUE	0.00015425	573	211	22	0.104265	0.0383944	GO:0051345	GO:BP	positive regulation of hydrolase activity	21100	15785	c("GO:0043085", "GO:0051336")
query_1	TRUE	0.00016237	479	211	20	0.0947867	0.0417537	GO:0043410	GO:BP	positive regulation of MAPK cascade	21100	12300	c("GO:0000165", "GO:0043408", "GO:1902533")
query_1	TRUE	0.000167081	1242	211	34	0.161137	0.0273752	GO:0042325	GO:BP	regulation of phosphorylation	21100	11668	c("GO:0016310", "GO:0019220")
query_1	TRUE	0.000173136	893	211	28	0.132701	0.031355	GO:0030334	GO:BP	regulation of cell migration	21100	7813	c("GO:0016477", "GO:2000145")
query_1	TRUE	0.00018254	392	211	18	0.0853081	0.0459184	GO:0010959	GO:BP	regulation of metal ion transport	21100	5077	c("GO:0030001", "GO:0043269")
query_1	TRUE	0.00023097	166	211	12	0.056872	0.0722892	GO:0007259	GO:BP	receptor signaling pathway via JAK-STAT	21100	3151	GO:0097696
query_1	TRUE	0.000235978	81	211	9	0.042654	0.111111	GO:0001910	GO:BP	regulation of leukocyte mediated cytotoxicity	21100	643	c("GO:0001909", "GO:0002703", "GO:0031341")
query_1	TRUE	0.00024245	1386	211	36	0.170616	0.025974	GO:0019220	GO:BP	regulation of phosphate metabolic process	21100	6472	c("GO:0006796", "GO:0051174")
query_1	TRUE	0.000250703	59	211	8	0.0379147	0.135593	GO:0002478	GO:BP	antigen processing and presentation of exogenous peptide antigen	21100	1124	c("GO:0019884", "GO:0048002")
query_1	TRUE	0.000251207	1388	211	36	0.170616	0.0259366	GO:0051174	GO:BP	regulation of phosphorus metabolic process	21100	15643	c("GO:0006793", "GO:0031323")
query_1	TRUE	0.000262795	82	211	9	0.042654	0.109756	GO:0048002	GO:BP	antigen processing and presentation of peptide antigen	21100	14483	GO:0019882
query_1	TRUE	0.000262795	82	211	9	0.042654	0.109756	GO:0051279	GO:BP	regulation of release of sequestered calcium ion into cytosol	21100	15727	c("GO:0051209", "GO:0051282", "GO:1903169")
query_1	TRUE	0.000273561	1028	211	30	0.14218	0.0291829	GO:0051270	GO:BP	regulation of cellular component movement	21100	15719	c("GO:0006928", "GO:0032879", "GO:0050794")
query_1	TRUE	0.000283328	360	211	17	0.0805687	0.0472222	GO:0006887	GO:BP	exocytosis	21100	2830	c("GO:0016192", "GO:0032940")
query_1	TRUE	0.000296486	751	211	25	0.118483	0.0332889	GO:0019725	GO:BP	cellular homeostasis	21100	6935	c("GO:0009987", "GO:0042592")
query_1	TRUE	0.000314761	139	211	11	0.0521327	0.0791367	GO:0050729	GO:BP	positive regulation of inflammatory response	21100	15280	c("GO:0006954", "GO:0031349", "GO:0032103", "GO:0050727")
query_1	TRUE	0.000317513	110	211	10	0.0473934	0.0909091	GO:0032652	GO:BP	regulation of interleukin-1 production	21100	8897	c("GO:0001817", "GO:0032612")
query_1	TRUE	0.000317513	110	211	10	0.0473934	0.0909091	GO:0032612	GO:BP	interleukin-1 production	21100	8857	GO:0001816
query_1	TRUE	0.000327285	61	211	8	0.0379147	0.131148	GO:0031663	GO:BP	lipopolysaccharide-mediated signaling pathway	21100	8426	c("GO:0007166", "GO:0071222")
query_1	TRUE	0.000336021	1097	211	31	0.146919	0.0282589	GO:0001932	GO:BP	regulation of protein phosphorylation	21100	662	c("GO:0006468", "GO:0031399", "GO:0042325")
query_1	TRUE	0.000340536	172	211	12	0.056872	0.0697674	GO:0097696	GO:BP	receptor signaling pathway via STAT	21100	21915	GO:0007166
query_1	TRUE	0.000340911	243	211	14	0.0663507	0.0576132	GO:0071216	GO:BP	cellular response to biotic stimulus	21100	19251	c("GO:0009607", "GO:0051716")
query_1	TRUE	0.00035979	85	211	9	0.042654	0.105882	GO:2000106	GO:BP	regulation of leukocyte apoptotic process	21100	29330	c("GO:0042981", "GO:0071887")
query_1	TRUE	0.000362904	26	211	6	0.028436	0.230769	GO:0002710	GO:BP	negative regulation of T cell mediated immunity	21100	1351	c("GO:0002456", "GO:0002707", "GO:0002709", "GO:0002823")
query_1	TRUE	0.000362939	42	211	7	0.0331754	0.166667	GO:0032735	GO:BP	positive regulation of interleukin-12 production	21100	8980	c("GO:0001819", "GO:0032615", "GO:0032655")
query_1	TRUE	0.000376573	112	211	10	0.0473934	0.0892857	GO:0046632	GO:BP	alpha-beta T cell differentiation	21100	14248	c("GO:0030217", "GO:0046631")
query_1	TRUE	0.000380105	505	211	20	0.0947867	0.039604	GO:0043065	GO:BP	positive regulation of apoptotic process	21100	12122	c("GO:0006915", "GO:0042981", "GO:0043068")
query_1	TRUE	0.000396332	285	211	15	0.07109	0.0526316	GO:0007162	GO:BP	negative regulation of cell adhesion	21100	3062	c("GO:0007155", "GO:0030155", "GO:0048523")
query_1	TRUE	0.000412195	658	211	23	0.109005	0.0349544	GO:0055082	GO:BP	cellular chemical homeostasis	21100	16786	c("GO:0019725", "GO:0048878")
query_1	TRUE	0.000431125	1419	211	36	0.170616	0.02537	GO:0042981	GO:BP	regulation of apoptotic process	21100	12064	c("GO:0006915", "GO:0043067")
query_1	TRUE	0.000440262	211	211	13	0.0616114	0.0616114	GO:0070374	GO:BP	positive regulation of ERK1 and ERK2 cascade	21100	18826	c("GO:0043410", "GO:0070371", "GO:0070372")
query_1	TRUE	0.000462715	27	211	6	0.028436	0.222222	GO:0038096	GO:BP	Fc-gamma receptor signaling pathway involved in phagocytosis	21100	11180	c("GO:0002431", "GO:0002433", "GO:0038094")
query_1	TRUE	0.000462715	27	211	6	0.028436	0.222222	GO:0002433	GO:BP	immune response-regulating cell surface receptor signaling pathway involved in phagocytosis	21100	1079	c("GO:0002252", "GO:0002768", "GO:0006909")
query_1	TRUE	0.000462715	27	211	6	0.028436	0.222222	GO:0090025	GO:BP	regulation of monocyte chemotaxis	21100	21053	c("GO:0002548", "GO:0002688", "GO:0071675")
query_1	TRUE	0.000467374	4313	211	75	0.35545	0.0173893	GO:0048731	GO:BP	system development	21100	15031	c("GO:0007275", "GO:0048856")
query_1	TRUE	0.000479449	64	211	8	0.0379147	0.125	GO:0002704	GO:BP	negative regulation of leukocyte mediated immunity	21100	1345	c("GO:0002443", "GO:0002698", "GO:0002703")
query_1	TRUE	0.000506868	44	211	7	0.0331754	0.159091	GO:0042269	GO:BP	regulation of natural killer cell mediated cytotoxicity	21100	11642	c("GO:0001910", "GO:0002715", "GO:0042267")
query_1	TRUE	0.000506868	44	211	7	0.0331754	0.159091	GO:0001913	GO:BP	T cell mediated cytotoxicity	21100	646	c("GO:0001909", "GO:0002456")
query_1	TRUE	0.00051115	1624	211	39	0.184834	0.0240148	GO:1901700	GO:BP	response to oxygen-containing compound	21100	24966	GO:0042221
query_1	TRUE	0.000542081	65	211	8	0.0379147	0.123077	GO:0030888	GO:BP	regulation of B cell proliferation	21100	8041	c("GO:0042100", "GO:0050670", "GO:0050864")
query_1	TRUE	0.000575292	6317	211	98	0.464455	0.0155137	GO:0032502	GO:BP	developmental process	21100	8804	GO:0008150
query_1	TRUE	0.000615589	118	211	10	0.0473934	0.0847458	GO:0032649	GO:BP	regulation of interferon-gamma production	21100	8894	c("GO:0001817", "GO:0032609")
query_1	TRUE	0.000666264	119	211	10	0.0473934	0.0840336	GO:0032609	GO:BP	interferon-gamma production	21100	8854	GO:0001816
query_1	TRUE	0.000688605	67	211	8	0.0379147	0.119403	GO:0046635	GO:BP	positive regulation of alpha-beta T cell activation	21100	14251	c("GO:0046631", "GO:0046634", "GO:0050870")
query_1	TRUE	0.00077377	68	211	8	0.0379147	0.117647	GO:0071677	GO:BP	positive regulation of mononuclear cell migration	21100	19661	c("GO:0002687", "GO:0071674", "GO:0071675")
query_1	TRUE	0.000866583	1658	211	39	0.184834	0.0235223	GO:0042592	GO:BP	homeostatic process	21100	11832	GO:0065008
query_1	TRUE	0.000941466	48	211	7	0.0331754	0.145833	GO:0002715	GO:BP	regulation of natural killer cell mediated immunity	21100	1356	c("GO:0002228", "GO:0002706", "GO:0045088")
query_1	TRUE	0.000941942	95	211	9	0.042654	0.0947368	GO:0045582	GO:BP	positive regulation of T cell differentiation	21100	13314	c("GO:0030217", "GO:0045580", "GO:0045621", "GO:0050870")
query_1	TRUE	0.000971419	70	211	8	0.0379147	0.114286	GO:0019884	GO:BP	antigen processing and presentation of exogenous antigen	21100	6997	GO:0019882
query_1	TRUE	0.00108912	49	211	7	0.0331754	0.142857	GO:0002474	GO:BP	antigen processing and presentation of peptide antigen via MHC class I	21100	1120	GO:0048002
query_1	TRUE	0.00113542	126	211	10	0.0473934	0.0793651	GO:0071347	GO:BP	cellular response to interleukin-1	21100	19376	c("GO:0070555", "GO:0071345")
query_1	TRUE	0.00113932	4160	211	72	0.341232	0.0173077	GO:0030154	GO:BP	cell differentiation	21100	7716	GO:0048869
query_1	TRUE	0.00125574	50	211	7	0.0331754	0.14	GO:0045058	GO:BP	T cell selection	21100	13103	c("GO:0002376", "GO:0030217")
query_1	TRUE	0.00125574	50	211	7	0.0331754	0.14	GO:0071622	GO:BP	regulation of granulocyte chemotaxis	21100	19613	c("GO:0002688", "GO:0071621")
query_1	TRUE	0.00142799	4184	211	72	0.341232	0.0172084	GO:0048869	GO:BP	cellular developmental process	21100	15158	c("GO:0009987", "GO:0032502")
query_1	TRUE	0.00154918	198	211	12	0.056872	0.0606061	GO:0050864	GO:BP	regulation of B cell activation	21100	15383	c("GO:0042113", "GO:0051249")
query_1	TRUE	0.00164684	33	211	6	0.028436	0.181818	GO:0002431	GO:BP	Fc receptor mediated stimulatory signaling pathway	21100	1077	GO:0002429
query_1	TRUE	0.00181699	201	211	12	0.056872	0.0597015	GO:0002285	GO:BP	lymphocyte activation involved in immune response	21100	940	c("GO:0002366", "GO:0046649")
query_1	TRUE	0.00183109	886	211	26	0.123223	0.0293454	GO:0030001	GO:BP	metal ion transport	21100	7665	GO:0006812
query_1	TRUE	0.00184323	76	211	8	0.0379147	0.105263	GO:0070227	GO:BP	lymphocyte apoptotic process	21100	18728	GO:0071887
query_1	TRUE	0.0018779	103	211	9	0.042654	0.0873786	GO:0046634	GO:BP	regulation of alpha-beta T cell activation	21100	14250	c("GO:0046631", "GO:0050863")
query_1	TRUE	0.0018779	103	211	9	0.042654	0.0873786	GO:1902106	GO:BP	negative regulation of leukocyte differentiation	21100	25356	c("GO:0002521", "GO:0045596", "GO:1902105", "GO:1903707")
query_1	TRUE	0.00188931	53	211	7	0.0331754	0.132075	GO:0002707	GO:BP	negative regulation of lymphocyte mediated immunity	21100	1348	c("GO:0002449", "GO:0002704", "GO:0002706")
query_1	TRUE	0.00197876	19	211	5	0.0236967	0.263158	GO:0048245	GO:BP	eosinophil chemotaxis	21100	14636	c("GO:0071621", "GO:0072677")
query_1	TRUE	0.00199112	167	211	11	0.0521327	0.0658683	GO:0002700	GO:BP	regulation of production of molecular mediator of immune response	21100	1341	c("GO:0002440", "GO:0002697", "GO:0010468")
query_1	TRUE	0.00201851	324	211	15	0.07109	0.0462963	GO:0070588	GO:BP	calcium ion transmembrane transport	21100	18944	c("GO:0006816", "GO:0098662")
query_1	TRUE	0.00203943	77	211	8	0.0379147	0.103896	GO:0002218	GO:BP	activation of innate immune response	21100	876	c("GO:0002253", "GO:0045089")
query_1	TRUE	0.00217375	7313	211	107	0.507109	0.0146315	GO:0019222	GO:BP	regulation of metabolic process	21100	6474	c("GO:0008152", "GO:0050789")
query_1	TRUE	0.00221012	105	211	9	0.042654	0.0857143	GO:1903707	GO:BP	negative regulation of hemopoiesis	21100	26756	c("GO:0002683", "GO:0030097", "GO:0051093", "GO:0051241", "GO:1903706")
query_1	TRUE	0.00234383	840	211	25	0.118483	0.0297619	GO:0045597	GO:BP	positive regulation of cell differentiation	21100	13329	c("GO:0030154", "GO:0045595", "GO:0048522", "GO:0051094")
query_1	TRUE	0.0025149	1268	211	32	0.151659	0.0252366	GO:0051094	GO:BP	positive regulation of developmental process	21100	15571	c("GO:0032502", "GO:0048518", "GO:0050793")
query_1	TRUE	0.00261693	20	211	5	0.0236967	0.25	GO:0090026	GO:BP	positive regulation of monocyte chemotaxis	21100	21054	c("GO:0002548", "GO:0002690", "GO:0071677", "GO:0090025")
query_1	TRUE	0.00281991	173	211	11	0.0521327	0.0635838	GO:0002221	GO:BP	pattern recognition receptor signaling pathway	21100	878	GO:0002764
query_1	TRUE	0.00283915	333	211	15	0.07109	0.045045	GO:0051235	GO:BP	maintenance of location	21100	15693	GO:0051179
query_1	TRUE	0.00287196	5452	211	86	0.407583	0.015774	GO:0010468	GO:BP	regulation of gene expression	21100	4649	c("GO:0010467", "GO:0060255")
query_1	TRUE	0.00293446	7354	211	107	0.507109	0.0145499	GO:0032501	GO:BP	multicellular organismal process	21100	8803	GO:0008150
query_1	TRUE	0.00299104	4768	211	78	0.369668	0.0163591	GO:0007275	GO:BP	multicellular organism development	21100	3166	c("GO:0032501", "GO:0048856")
query_1	TRUE	0.00313273	57	211	7	0.0331754	0.122807	GO:0032653	GO:BP	regulation of interleukin-10 production	21100	8898	c("GO:0001817", "GO:0032613")
query_1	TRUE	0.00313273	57	211	7	0.0331754	0.122807	GO:0032613	GO:BP	interleukin-10 production	21100	8858	GO:0001816
query_1	TRUE	0.0033434	37	211	6	0.028436	0.162162	GO:0045730	GO:BP	respiratory burst	21100	13458	GO:0008152
query_1	TRUE	0.0035133	214	211	12	0.056872	0.0560748	GO:0002573	GO:BP	myeloid leukocyte differentiation	21100	1217	c("GO:0002521", "GO:0030099")
query_1	TRUE	0.00389434	10	211	4	0.0189573	0.4	GO:0035747	GO:BP	natural killer cell chemotaxis	21100	10602	GO:0048247
query_1	TRUE	0.00389434	10	211	4	0.0189573	0.4	GO:0002676	GO:BP	regulation of chronic inflammatory response	21100	1317	c("GO:0002544", "GO:0050727")
query_1	TRUE	0.00447849	930	211	26	0.123223	0.027957	GO:0022603	GO:BP	regulation of anatomical structure morphogenesis	21100	7595	c("GO:0009653", "GO:0050793")
query_1	TRUE	0.00478178	816	211	24	0.113744	0.0294118	GO:0042327	GO:BP	positive regulation of phosphorylation	21100	11670	c("GO:0016310", "GO:0042325", "GO:0045937")
query_1	TRUE	0.00554254	23	211	5	0.0236967	0.217391	GO:0001911	GO:BP	negative regulation of leukocyte mediated cytotoxicity	21100	644	c("GO:0001909", "GO:0001910", "GO:0002704", "GO:0031342")
query_1	TRUE	0.00554254	23	211	5	0.0236967	0.217391	GO:0072677	GO:BP	eosinophil migration	21100	20387	GO:0097530
query_1	TRUE	0.00623152	63	211	7	0.0331754	0.111111	GO:0048247	GO:BP	lymphocyte chemotaxis	21100	14638	c("GO:0030595", "GO:0072676")
query_1	TRUE	0.00625467	41	211	6	0.028436	0.146341	GO:0046633	GO:BP	alpha-beta T cell proliferation	21100	14249	c("GO:0042098", "GO:0046631")
query_1	TRUE	0.00669122	153	211	10	0.0473934	0.0653595	GO:0008360	GO:BP	regulation of cell shape	21100	3599	c("GO:0022604", "GO:0065008")
query_1	TRUE	0.00675867	120	211	9	0.042654	0.075	GO:0002702	GO:BP	positive regulation of production of molecular mediator of immune response	21100	1343	c("GO:0002440", "GO:0002699", "GO:0002700", "GO:0010628")
query_1	TRUE	0.00697014	313	211	14	0.0663507	0.0447284	GO:0019058	GO:BP	viral life cycle	21100	6418	GO:0016032
query_1	TRUE	0.00724006	895	211	25	0.118483	0.027933	GO:0010562	GO:BP	positive regulation of phosphorus metabolic process	21100	4713	c("GO:0006793", "GO:0031325", "GO:0051174")
query_1	TRUE	0.00724006	895	211	25	0.118483	0.027933	GO:0045937	GO:BP	positive regulation of phosphate metabolic process	21100	13645	c("GO:0006796", "GO:0010562", "GO:0019220")
query_1	TRUE	0.00764134	272	211	13	0.0616114	0.0477941	GO:0043270	GO:BP	positive regulation of ion transport	21100	12213	c("GO:0006811", "GO:0043269", "GO:0051050")
query_1	TRUE	0.00834042	43	211	6	0.028436	0.139535	GO:0030890	GO:BP	positive regulation of B cell proliferation	21100	8043	c("GO:0030888", "GO:0042100", "GO:0050671", "GO:0050871")
query_1	TRUE	0.00855198	66	211	7	0.0331754	0.106061	GO:0150076	GO:BP	neuroinflammatory response	21100	23267	GO:0006954
query_1	TRUE	0.00860936	93	211	8	0.0379147	0.0860215	GO:0070664	GO:BP	negative regulation of leukocyte proliferation	21100	18997	c("GO:0008285", "GO:0070661", "GO:0070663")
query_1	TRUE	0.00861004	25	211	5	0.0236967	0.2	GO:0042832	GO:BP	defense response to protozoan	21100	11979	c("GO:0001562", "GO:0098542")
query_1	TRUE	0.00861004	25	211	5	0.0236967	0.2	GO:0001779	GO:BP	natural killer cell differentiation	21100	556	c("GO:0030098", "GO:0030101")
query_1	TRUE	0.0088606	234	211	12	0.056872	0.0512821	GO:0031348	GO:BP	negative regulation of defense response	21100	8279	c("GO:0006952", "GO:0031347", "GO:0048585")
query_1	TRUE	0.00946672	125	211	9	0.042654	0.072	GO:0050868	GO:BP	negative regulation of T cell activation	21100	15387	c("GO:0042110", "GO:0050863", "GO:0051250", "GO:1903038")
query_1	TRUE	0.00947458	196	211	11	0.0521327	0.0561224	GO:0002440	GO:BP	production of molecular mediator of immune response	21100	1086	c("GO:0002376", "GO:0010467")
query_1	TRUE	0.0098009	735	211	22	0.104265	0.029932	GO:0001934	GO:BP	positive regulation of protein phosphorylation	21100	664	c("GO:0001932", "GO:0006468", "GO:0031401", "GO:0042327")
query_1	TRUE	0.00994809	197	211	11	0.0521327	0.0558376	GO:0016064	GO:BP	immunoglobulin mediated immune response	21100	5664	GO:0019724
query_1	TRUE	0.0102708	6787	211	99	0.469194	0.0145867	GO:0060255	GO:BP	regulation of macromolecule metabolic process	21100	17032	c("GO:0019222", "GO:0043170")
query_1	TRUE	0.0105736	26	211	5	0.0236967	0.192308	GO:0001562	GO:BP	response to protozoan	21100	461	GO:0051707
query_1	TRUE	0.0105736	26	211	5	0.0236967	0.192308	GO:0031342	GO:BP	negative regulation of cell killing	21100	8273	c("GO:0001906", "GO:0031341", "GO:0048523")
query_1	TRUE	0.011137	1166	211	29	0.137441	0.0248714	GO:1901701	GO:BP	cellular response to oxygen-containing compound	21100	24967	c("GO:0070887", "GO:1901700")
query_1	TRUE	0.0114778	240	211	12	0.056872	0.05	GO:0045055	GO:BP	regulated exocytosis	21100	13100	GO:0006887
query_1	TRUE	0.0114949	200	211	11	0.0521327	0.055	GO:0019724	GO:BP	B cell mediated immunity	21100	6934	c("GO:0002449", "GO:0002460")
query_1	TRUE	0.0124986	46	211	6	0.028436	0.130435	GO:0002220	GO:BP	innate immune response activating cell surface receptor signaling pathway	21100	877	c("GO:0002429", "GO:0002758")
query_1	TRUE	0.0124986	46	211	6	0.028436	0.130435	GO:0032715	GO:BP	negative regulation of interleukin-6 production	21100	8960	c("GO:0001818", "GO:0032635", "GO:0032675")
query_1	TRUE	0.0128716	27	211	5	0.0236967	0.185185	GO:0032703	GO:BP	negative regulation of interleukin-2 production	21100	8948	c("GO:0001818", "GO:0032623", "GO:0032663")
query_1	TRUE	0.0132477	203	211	11	0.0521327	0.0541872	GO:0019722	GO:BP	calcium-mediated signaling	21100	6933	GO:0019932
query_1	TRUE	0.014209	47	211	6	0.028436	0.12766	GO:0002758	GO:BP	innate immune response-activating signal transduction	21100	1393	c("GO:0002218", "GO:0002757")
query_1	TRUE	0.0153884	168	211	10	0.0473934	0.0595238	GO:1903169	GO:BP	regulation of calcium ion transmembrane transport	21100	26252	c("GO:0051924", "GO:0070588", "GO:1904062")
query_1	TRUE	0.0171677	102	211	8	0.0379147	0.0784314	GO:0042116	GO:BP	macrophage activation	21100	11540	GO:0002274
query_1	TRUE	0.0179882	14	211	4	0.0189573	0.285714	GO:0001771	GO:BP	immunological synapse formation	21100	549	c("GO:0009988", "GO:0046649")
query_1	TRUE	0.0179882	14	211	4	0.0189573	0.285714	GO:0001787	GO:BP	natural killer cell proliferation	21100	561	c("GO:0030101", "GO:0046651")
query_1	TRUE	0.0181995	49	211	6	0.028436	0.122449	GO:0043300	GO:BP	regulation of leukocyte degranulation	21100	12229	c("GO:0002697", "GO:0043299", "GO:1903305")
query_1	TRUE	0.0181995	49	211	6	0.028436	0.122449	GO:0046638	GO:BP	positive regulation of alpha-beta T cell differentiation	21100	14254	c("GO:0045582", "GO:0046632", "GO:0046635", "GO:0046637")
query_1	TRUE	0.0183731	1599	211	35	0.165877	0.0218887	GO:0048585	GO:BP	negative regulation of response to stimulus	21100	14897	c("GO:0048519", "GO:0048583", "GO:0050896")
query_1	TRUE	0.0184553	103	211	8	0.0379147	0.0776699	GO:0002824	GO:BP	positive regulation of adaptive immune response based on somatic recombination of immune receptors built from immunoglobulin superfamily domains	21100	1458	c("GO:0002460", "GO:0002821", "GO:0002822")
query_1	TRUE	0.0186287	29	211	5	0.0236967	0.172414	GO:2000108	GO:BP	positive regulation of leukocyte apoptotic process	21100	29332	c("GO:0043065", "GO:0071887", "GO:2000106")
query_1	TRUE	0.0187482	389	211	15	0.07109	0.0385604	GO:0032102	GO:BP	negative regulation of response to external stimulus	21100	8540	c("GO:0009605", "GO:0032101", "GO:0048585")
query_1	TRUE	0.0188516	136	211	9	0.042654	0.0661765	GO:1903038	GO:BP	negative regulation of leukocyte cell-cell adhesion	21100	26151	c("GO:0007159", "GO:0022408", "GO:1903037")
query_1	TRUE	0.0193642	653	211	20	0.0947867	0.0306279	GO:0045859	GO:BP	regulation of protein kinase activity	21100	13573	c("GO:0001932", "GO:0043549")
query_1	TRUE	0.0194289	5	211	3	0.014218	0.6	GO:0002476	GO:BP	antigen processing and presentation of endogenous peptide antigen via MHC class Ib	21100	1122	c("GO:0002428", "GO:0002483")
query_1	TRUE	0.0194289	5	211	3	0.014218	0.6	GO:0045590	GO:BP	negative regulation of regulatory T cell differentiation	21100	13322	c("GO:0045066", "GO:0045581", "GO:0045589")
query_1	TRUE	0.0203658	770	211	22	0.104265	0.0285714	GO:0043549	GO:BP	regulation of kinase activity	21100	12396	c("GO:0042325", "GO:0051338")
query_1	TRUE	0.0220629	76	211	7	0.0331754	0.0921053	GO:0032729	GO:BP	positive regulation of interferon-gamma production	21100	8974	c("GO:0001819", "GO:0032609", "GO:0032649")
query_1	TRUE	0.0220629	76	211	7	0.0331754	0.0921053	GO:0002437	GO:BP	inflammatory response to antigenic stimulus	21100	1083	c("GO:0006954", "GO:0006955")
query_1	TRUE	0.0230523	51	211	6	0.028436	0.117647	GO:0002639	GO:BP	positive regulation of immunoglobulin production	21100	1283	c("GO:0002377", "GO:0002637", "GO:0002702")
query_1	TRUE	0.0237817	3513	211	60	0.28436	0.0170794	GO:0048513	GO:BP	animal organ development	21100	14835	GO:0048856
query_1	TRUE	0.0243374	15	211	4	0.0189573	0.266667	GO:0002517	GO:BP	T cell tolerance induction	21100	1162	GO:0002507
query_1	TRUE	0.0258434	52	211	6	0.028436	0.115385	GO:0043277	GO:BP	apoptotic cell clearance	21100	12217	GO:0006909
query_1	TRUE	0.0261836	108	211	8	0.0379147	0.0740741	GO:0002821	GO:BP	positive regulation of adaptive immune response	21100	1455	c("GO:0002250", "GO:0002819", "GO:0050778")
query_1	TRUE	0.0289014	53	211	6	0.028436	0.113208	GO:0070231	GO:BP	T cell apoptotic process	21100	18732	GO:0070227
query_1	TRUE	0.0308281	32	211	5	0.0236967	0.15625	GO:0042590	GO:BP	antigen processing and presentation of exogenous peptide antigen via MHC class I	21100	11831	c("GO:0002474", "GO:0002478")
query_1	TRUE	0.032196	16	211	4	0.0189573	0.25	GO:0023035	GO:BP	CD40 signaling pathway	21100	7633	GO:0007166
query_1	TRUE	0.032245	54	211	6	0.028436	0.111111	GO:0002823	GO:BP	negative regulation of adaptive immune response based on somatic recombination of immune receptors built from immunoglobulin superfamily domains	21100	1457	c("GO:0002460", "GO:0002820", "GO:0002822")
query_1	TRUE	0.034181	112	211	8	0.0379147	0.0714286	GO:0002698	GO:BP	negative regulation of immune effector process	21100	1339	c("GO:0002252", "GO:0002683", "GO:0002697")
query_1	TRUE	0.0348593	1173	211	28	0.132701	0.0238704	GO:0006812	GO:BP	cation transport	21100	2768	GO:0006811
query_1	TRUE	0.0358939	55	211	6	0.028436	0.109091	GO:1905517	GO:BP	macrophage migration	21100	28405	GO:0097529
query_1	TRUE	0.036039	33	211	5	0.0236967	0.151515	GO:0045589	GO:BP	regulation of regulatory T cell differentiation	21100	13321	c("GO:0045066", "GO:0045580")
query_1	TRUE	0.0385707	6	211	3	0.014218	0.5	GO:0060369	GO:BP	positive regulation of Fc receptor mediated stimulatory signaling pathway	21100	17142	c("GO:0002431", "GO:0009967", "GO:0050778", "GO:0060368")
query_1	TRUE	0.0385707	6	211	3	0.014218	0.5	GO:0002428	GO:BP	antigen processing and presentation of peptide antigen via MHC class Ib	21100	1074	c("GO:0002475", "GO:0048002")
query_1	TRUE	0.0393191	573	211	18	0.0853081	0.0314136	GO:0071396	GO:BP	cellular response to lipid	21100	19425	c("GO:0033993", "GO:0071310")
query_1	TRUE	0.0417731	17	211	4	0.0189573	0.235294	GO:0002544	GO:BP	chronic inflammatory response	21100	1188	GO:0006954
query_1	TRUE	0.0421561	367	211	14	0.0663507	0.0381471	GO:0043087	GO:BP	regulation of GTPase activity	21100	12131	GO:0051336
query_1	TRUE	0.0441905	57	211	6	0.028436	0.105263	GO:0070228	GO:BP	regulation of lymphocyte apoptotic process	21100	18729	c("GO:0070227", "GO:2000106")
query_1	TRUE	0.0441905	57	211	6	0.028436	0.105263	GO:0002886	GO:BP	regulation of myeloid leukocyte mediated immunity	21100	1520	c("GO:0002444", "GO:0002703")
query_1	TRUE	0.0448143	419	211	15	0.07109	0.0357995	GO:0016032	GO:BP	viral process	21100	5639	GO:0008150
query_1	TRUE	0.0449789	190	211	10	0.0473934	0.0526316	GO:0022408	GO:BP	negative regulation of cell-cell adhesion	21100	7583	c("GO:0007162", "GO:0022407", "GO:0098609")
query_1	TRUE	0.0465689	276	211	12	0.056872	0.0434783	GO:0043547	GO:BP	positive regulation of GTPase activity	21100	12395	c("GO:0043087", "GO:0051345")
query_1	TRUE	0.0485002	35	211	5	0.0236967	0.142857	GO:0032743	GO:BP	positive regulation of interleukin-2 production	21100	8988	c("GO:0001819", "GO:0032623", "GO:0032663")
query_1	FALSE	0.0511702	641	211	19	0.0900474	0.0296412	GO:0006897	GO:BP	endocytosis	21100	2840	GO:0016192
query_1	FALSE	0.0531109	119	211	8	0.0379147	0.0672269	GO:0002761	GO:BP	regulation of myeloid leukocyte differentiation	21100	1396	c("GO:0002573", "GO:0045637", "GO:1902105")
query_1	FALSE	0.0532883	18	211	4	0.0189573	0.222222	GO:2001185	GO:BP	regulation of CD8-positive, alpha-beta T cell activation	21100	30353	c("GO:0036037", "GO:0046634")
query_1	FALSE	0.0532883	18	211	4	0.0189573	0.222222	GO:0010759	GO:BP	positive regulation of macrophage chemotaxis	21100	4896	c("GO:0002690", "GO:0010758", "GO:0048246", "GO:0071622", "GO:0071675", "GO:1905523")
query_1	FALSE	0.0539656	59	211	6	0.028436	0.101695	GO:0002820	GO:BP	negative regulation of adaptive immune response	21100	1454	c("GO:0002250", "GO:0002819", "GO:0050777")
query_1	FALSE	0.0558672	36	211	5	0.0236967	0.138889	GO:0060333	GO:BP	interferon-gamma-mediated signaling pathway	21100	17108	c("GO:0019221", "GO:0071346")
query_1	FALSE	0.0558672	36	211	5	0.0236967	0.138889	GO:0045066	GO:BP	regulatory T cell differentiation	21100	13111	GO:0030217
query_1	FALSE	0.0564217	120	211	8	0.0379147	0.0666667	GO:0002224	GO:BP	toll-like receptor signaling pathway	21100	881	GO:0002221
query_1	FALSE	0.059466	60	211	6	0.028436	0.1	GO:0032731	GO:BP	positive regulation of interleukin-1 beta production	21100	8976	c("GO:0032611", "GO:0032651", "GO:0032732")
query_1	FALSE	0.0640741	37	211	5	0.0236967	0.135135	GO:0001914	GO:BP	regulation of T cell mediated cytotoxicity	21100	647	c("GO:0001910", "GO:0001913", "GO:0002709")
query_1	FALSE	0.0640741	37	211	5	0.0236967	0.135135	GO:0043368	GO:BP	positive T cell selection	21100	12267	GO:0045058
query_1	FALSE	0.06568	893	211	23	0.109005	0.0257559	GO:0051338	GO:BP	regulation of transferase activity	21100	15778	GO:0050790
query_1	FALSE	0.0669708	19	211	4	0.0189573	0.210526	GO:0002483	GO:BP	antigen processing and presentation of endogenous peptide antigen	21100	1129	c("GO:0019883", "GO:0048002")
query_1	FALSE	0.0670002	7	211	3	0.014218	0.428571	GO:0140507	GO:BP	granzyme-mediated programmed cell death signaling pathway	21100	23129	c("GO:0007165", "GO:0012501")
query_1	FALSE	0.0670002	7	211	3	0.014218	0.428571	GO:0031580	GO:BP	membrane raft distribution	21100	8379	c("GO:0031579", "GO:0051665")
query_1	FALSE	0.0709937	489	211	16	0.0758294	0.0327198	GO:0033674	GO:BP	positive regulation of kinase activity	21100	9602	c("GO:0042327", "GO:0043549", "GO:0051347")
query_1	FALSE	0.0731857	38	211	5	0.0236967	0.131579	GO:0002369	GO:BP	T cell cytokine production	21100	1024	c("GO:0002367", "GO:0002456")
query_1	FALSE	0.0731857	38	211	5	0.0236967	0.131579	GO:0002724	GO:BP	regulation of T cell cytokine production	21100	1365	c("GO:0002369", "GO:0002709", "GO:0002718")
query_1	FALSE	0.0805693	2536	211	46	0.218009	0.0181388	GO:0051246	GO:BP	regulation of protein metabolic process	21100	15701	c("GO:0019538", "GO:0051171", "GO:0060255", "GO:0080090")
query_1	FALSE	0.0830593	20	211	4	0.0189573	0.2	GO:0002643	GO:BP	regulation of tolerance induction	21100	1284	c("GO:0002507", "GO:0002682")
query_1	FALSE	0.0832697	39	211	5	0.0236967	0.128205	GO:0032814	GO:BP	regulation of natural killer cell activation	21100	9043	c("GO:0030101", "GO:0051249")
query_1	FALSE	0.0832697	39	211	5	0.0236967	0.128205	GO:0048246	GO:BP	macrophage chemotaxis	21100	14637	c("GO:0030595", "GO:1905517")
query_1	FALSE	0.0861472	64	211	6	0.028436	0.09375	GO:0045576	GO:BP	mast cell activation	21100	13308	GO:0002274
query_1	FALSE	0.0941239	65	211	6	0.028436	0.0923077	GO:0006801	GO:BP	superoxide metabolic process	21100	2757	GO:0072593
query_1	FALSE	0.0941239	65	211	6	0.028436	0.0923077	GO:0042531	GO:BP	positive regulation of tyrosine phosphorylation of STAT protein	21100	11806	c("GO:0007260", "GO:0042509", "GO:0050731")
query_1	FALSE	0.0943962	40	211	5	0.0236967	0.125	GO:0042554	GO:BP	superoxide anion generation	21100	11824	GO:0006801
query_1	FALSE	0.0943962	40	211	5	0.0236967	0.125	GO:0032733	GO:BP	positive regulation of interleukin-10 production	21100	8978	c("GO:0001819", "GO:0032613", "GO:0032653")
query_1	FALSE	0.0985487	3271	211	55	0.260664	0.0168144	GO:0031325	GO:BP	positive regulation of cellular metabolic process	21100	8257	c("GO:0009893", "GO:0031323", "GO:0044237", "GO:0048522")
query_1	FALSE	0.101801	21	211	4	0.0189573	0.190476	GO:0050855	GO:BP	regulation of B cell receptor signaling pathway	21100	15374	c("GO:0050853", "GO:0050854")
query_1	FALSE	0.101801	21	211	4	0.0189573	0.190476	GO:1901739	GO:BP	regulation of myoblast fusion	21100	25003	c("GO:0007520", "GO:0060142")
query_1	FALSE	0.102681	66	211	6	0.028436	0.0909091	GO:0046637	GO:BP	regulation of alpha-beta T cell differentiation	21100	14253	c("GO:0045580", "GO:0046632", "GO:0046634")
query_1	FALSE	0.106409	8	211	3	0.014218	0.375	GO:0051665	GO:BP	membrane raft localization	21100	16023	GO:0051668
query_1	FALSE	0.106409	8	211	3	0.014218	0.375	GO:2000501	GO:BP	regulation of natural killer cell chemotaxis	21100	29717	c("GO:0035747", "GO:1901623")
query_1	FALSE	0.108611	97	211	7	0.0331754	0.0721649	GO:0002718	GO:BP	regulation of cytokine production involved in immune response	21100	1359	c("GO:0001817", "GO:0002367", "GO:0002700")
query_1	FALSE	0.108611	97	211	7	0.0331754	0.0721649	GO:0002367	GO:BP	cytokine production involved in immune response	21100	1022	c("GO:0001816", "GO:0002440", "GO:0006955")
query_1	FALSE	0.111637	132	211	8	0.0379147	0.0606061	GO:0030168	GO:BP	platelet activation	21100	7724	c("GO:0001775", "GO:0007596")
query_1	FALSE	0.111849	67	211	6	0.028436	0.0895522	GO:0072678	GO:BP	T cell migration	21100	20388	GO:0072676
query_1	FALSE	0.120071	42	211	5	0.0236967	0.119048	GO:1990840	GO:BP	response to lectin	21100	29148	GO:0009607
query_1	FALSE	0.120071	42	211	5	0.0236967	0.119048	GO:0002223	GO:BP	stimulatory C-type lectin receptor signaling pathway	21100	880	c("GO:0002220", "GO:1990858")
query_1	FALSE	0.120071	42	211	5	0.0236967	0.119048	GO:0051281	GO:BP	positive regulation of release of sequestered calcium ion into cytosol	21100	15729	c("GO:0051209", "GO:0051279", "GO:1904427")
query_1	FALSE	0.120071	42	211	5	0.0236967	0.119048	GO:1990858	GO:BP	cellular response to lectin	21100	29158	GO:1990840
query_1	FALSE	0.123452	22	211	4	0.0189573	0.181818	GO:0045061	GO:BP	thymic T cell selection	21100	13106	c("GO:0033077", "GO:0045058")
query_1	FALSE	0.130754	307	211	12	0.056872	0.0390879	GO:0022604	GO:BP	regulation of cell morphogenesis	21100	7596	c("GO:0000902", "GO:0022603")
query_1	FALSE	0.137899	136	211	8	0.0379147	0.0588235	GO:0044106	GO:BP	cellular amine metabolic process	21100	12637	c("GO:0009308", "GO:0034641")
query_1	FALSE	0.14242	575	211	17	0.0805687	0.0295652	GO:0051347	GO:BP	positive regulation of transferase activity	21100	15787	c("GO:0043085", "GO:0051338")
query_1	FALSE	0.151961	2370	211	43	0.203791	0.0181435	GO:0032268	GO:BP	regulation of cellular protein metabolic process	21100	8640	c("GO:0031323", "GO:0044267", "GO:0051246")
query_1	FALSE	0.155282	71	211	6	0.028436	0.084507	GO:0032732	GO:BP	positive regulation of interleukin-1 production	21100	8977	c("GO:0001819", "GO:0032612", "GO:0032652")
query_1	FALSE	0.158436	9	211	3	0.014218	0.333333	GO:0001915	GO:BP	negative regulation of T cell mediated cytotoxicity	21100	648	c("GO:0001911", "GO:0001913", "GO:0001914", "GO:0002710")
query_1	FALSE	0.158436	9	211	3	0.014218	0.333333	GO:2001187	GO:BP	positive regulation of CD8-positive, alpha-beta T cell activation	21100	30355	c("GO:0036037", "GO:0046635", "GO:2001185")
query_1	FALSE	0.159268	103	211	7	0.0331754	0.0679612	GO:0035710	GO:BP	CD4-positive, alpha-beta T cell activation	21100	10573	GO:0046631
query_1	FALSE	0.168306	45	211	5	0.0236967	0.111111	GO:0002861	GO:BP	regulation of inflammatory response to antigenic stimulus	21100	1495	c("GO:0002437", "GO:0050727", "GO:0050776")
query_1	FALSE	0.168306	45	211	5	0.0236967	0.111111	GO:0001774	GO:BP	microglial cell activation	21100	551	c("GO:0002269", "GO:0042116", "GO:0061900")
query_1	FALSE	0.168306	45	211	5	0.0236967	0.111111	GO:0038095	GO:BP	Fc-epsilon receptor signaling pathway	21100	11179	GO:0038093
query_1	FALSE	0.169102	140	211	8	0.0379147	0.0571429	GO:0034614	GO:BP	cellular response to reactive oxygen species	21100	9982	c("GO:0000302", "GO:0034599", "GO:1901701")
query_1	FALSE	0.177755	141	211	8	0.0379147	0.0567376	GO:0009308	GO:BP	amine metabolic process	21100	3888	GO:1901564
query_1	FALSE	0.179906	105	211	7	0.0331754	0.0666667	GO:0002444	GO:BP	myeloid leukocyte mediated immunity	21100	1090	GO:0002443
query_1	FALSE	0.187307	46	211	5	0.0236967	0.108696	GO:0045581	GO:BP	negative regulation of T cell differentiation	21100	13313	c("GO:0030217", "GO:0045580", "GO:0045620", "GO:0050868")
query_1	FALSE	0.190202	1023	211	24	0.113744	0.0234604	GO:0048878	GO:BP	chemical homeostasis	21100	15167	GO:0042592
query_1	FALSE	0.195924	74	211	6	0.028436	0.0810811	GO:0002637	GO:BP	regulation of immunoglobulin production	21100	1281	c("GO:0002377", "GO:0002700")
query_1	FALSE	0.199062	2	211	2	0.00947867	1	GO:2000349	GO:BP	negative regulation of CD40 signaling pathway	21100	29571	c("GO:0009968", "GO:0023035", "GO:2000348")
query_1	FALSE	0.199062	2	211	2	0.00947867	1	GO:0002270	GO:BP	plasmacytoid dendritic cell activation	21100	925	GO:0045321
query_1	FALSE	0.207913	47	211	5	0.0236967	0.106383	GO:0031640	GO:BP	killing of cells of another organism	21100	8404	c("GO:0001906", "GO:0044419")
query_1	FALSE	0.224668	10	211	3	0.014218	0.3	GO:0060368	GO:BP	regulation of Fc receptor mediated stimulatory signaling pathway	21100	17141	c("GO:0002431", "GO:0009966", "GO:0050776")
query_1	FALSE	0.230217	48	211	5	0.0236967	0.104167	GO:0002269	GO:BP	leukocyte activation involved in inflammatory response	21100	924	c("GO:0006954", "GO:0045321")
query_1	FALSE	0.230217	48	211	5	0.0236967	0.104167	GO:2000107	GO:BP	negative regulation of leukocyte apoptotic process	21100	29331	c("GO:0043066", "GO:0071887", "GO:2000106")
query_1	FALSE	0.244519	26	211	4	0.0189573	0.153846	GO:0002407	GO:BP	dendritic cell chemotaxis	21100	1054	c("GO:0030595", "GO:0036336")
query_1	FALSE	0.244519	26	211	4	0.0189573	0.153846	GO:0032816	GO:BP	positive regulation of natural killer cell activation	21100	9045	c("GO:0030101", "GO:0032814", "GO:0051251")
query_1	FALSE	0.244519	26	211	4	0.0189573	0.153846	GO:1905523	GO:BP	positive regulation of macrophage migration	21100	28411	c("GO:0002687", "GO:1905517", "GO:1905521")
query_1	FALSE	0.244519	26	211	4	0.0189573	0.153846	GO:0019883	GO:BP	antigen processing and presentation of endogenous antigen	21100	6996	GO:0019882
query_1	FALSE	0.244519	26	211	4	0.0189573	0.153846	GO:1901623	GO:BP	regulation of lymphocyte chemotaxis	21100	24901	c("GO:0002688", "GO:0048247", "GO:2000401")
query_1	FALSE	0.244601	77	211	6	0.028436	0.0779221	GO:0042509	GO:BP	regulation of tyrosine phosphorylation of STAT protein	21100	11805	c("GO:0007260", "GO:0050730")
query_1	FALSE	0.244601	77	211	6	0.028436	0.0779221	GO:0002532	GO:BP	production of molecular mediator involved in inflammatory response	21100	1177	c("GO:0006954", "GO:0032501")
query_1	FALSE	0.25431	49	211	5	0.0236967	0.102041	GO:0043370	GO:BP	regulation of CD4-positive, alpha-beta T cell differentiation	21100	12269	c("GO:0043367", "GO:0046637", "GO:2000514")
query_1	FALSE	0.25431	49	211	5	0.0236967	0.102041	GO:0002762	GO:BP	negative regulation of myeloid leukocyte differentiation	21100	1397	c("GO:0002573", "GO:0002761", "GO:0045638", "GO:1902106")
query_1	FALSE	0.25431	49	211	5	0.0236967	0.102041	GO:0043303	GO:BP	mast cell degranulation	21100	12232	c("GO:0002279", "GO:0002448", "GO:0032418", "GO:0043299", "GO:0051656")
query_1	FALSE	0.257297	1527	211	31	0.146919	0.0203012	GO:0031399	GO:BP	regulation of protein modification process	21100	8297	c("GO:0006464", "GO:0032268")
query_1	FALSE	0.278738	983	211	23	0.109005	0.0233978	GO:0060548	GO:BP	negative regulation of cell death	21100	17313	c("GO:0008219", "GO:0010941", "GO:0048523")
query_1	FALSE	0.282055	79	211	6	0.028436	0.0759494	GO:0007260	GO:BP	tyrosine phosphorylation of STAT protein	21100	3152	c("GO:0007259", "GO:0018108")
query_1	FALSE	0.282055	79	211	6	0.028436	0.0759494	GO:0014068	GO:BP	positive regulation of phosphatidylinositol 3-kinase signaling	21100	5182	c("GO:0014065", "GO:0014066", "GO:1902533")
query_1	FALSE	0.284806	27	211	4	0.0189573	0.148148	GO:0036037	GO:BP	CD8-positive, alpha-beta T cell activation	21100	10827	GO:0046631
query_1	FALSE	0.30178	923	211	22	0.104265	0.0238353	GO:0046903	GO:BP	secretion	21100	14441	GO:0006810
query_1	FALSE	0.302411	80	211	6	0.028436	0.075	GO:0033077	GO:BP	T cell differentiation in thymus	21100	9232	GO:0030217
query_1	FALSE	0.306642	11	211	3	0.014218	0.272727	GO:0002863	GO:BP	positive regulation of inflammatory response to antigenic stimulus	21100	1497	c("GO:0002437", "GO:0002861", "GO:0050729", "GO:0050778")
query_1	FALSE	0.306642	11	211	3	0.014218	0.272727	GO:0045060	GO:BP	negative thymic T cell selection	21100	13105	c("GO:0043383", "GO:0045061")
query_1	FALSE	0.306642	11	211	3	0.014218	0.272727	GO:0002725	GO:BP	negative regulation of T cell cytokine production	21100	1366	c("GO:0002369", "GO:0002710", "GO:0002719", "GO:0002724")
query_1	FALSE	0.306642	11	211	3	0.014218	0.272727	GO:0098883	GO:BP	synapse pruning	21100	22141	c("GO:0050808", "GO:0150146")
query_1	FALSE	0.308248	51	211	5	0.0236967	0.0980392	GO:0002279	GO:BP	mast cell activation involved in immune response	21100	934	c("GO:0002275", "GO:0045576")
query_1	FALSE	0.308248	51	211	5	0.0236967	0.0980392	GO:0002448	GO:BP	mast cell mediated immunity	21100	1094	GO:0002444
query_1	FALSE	0.308248	51	211	5	0.0236967	0.0980392	GO:0061900	GO:BP	glial cell activation	21100	18426	c("GO:0001775", "GO:0150076")
query_1	FALSE	0.322573	288	211	11	0.0521327	0.0381944	GO:0007249	GO:BP	I-kappaB kinase/NF-kappaB signaling	21100	3142	GO:0035556
query_1	FALSE	0.329683	28	211	4	0.0189573	0.142857	GO:0010758	GO:BP	regulation of macrophage chemotaxis	21100	4895	c("GO:0002688", "GO:0048246", "GO:1905521")
query_1	FALSE	0.331767	1406	211	29	0.137441	0.0206259	GO:0032270	GO:BP	positive regulation of cellular protein metabolic process	21100	8642	c("GO:0031325", "GO:0032268", "GO:0044267", "GO:0051247")
query_1	FALSE	0.338291	52	211	5	0.0236967	0.0961538	GO:0006968	GO:BP	cellular defense response	21100	2898	GO:0006952
query_1	FALSE	0.346605	82	211	6	0.028436	0.0731707	GO:1904427	GO:BP	positive regulation of calcium ion transmembrane transport	21100	27399	c("GO:0051928", "GO:0070588", "GO:1903169", "GO:1904064")
query_1	FALSE	0.356197	681	211	18	0.0853081	0.0264317	GO:0043269	GO:BP	regulation of ion transport	21100	12212	c("GO:0006811", "GO:0051049")
query_1	FALSE	0.370536	83	211	6	0.028436	0.0722892	GO:0043367	GO:BP	CD4-positive, alpha-beta T cell differentiation	21100	12266	c("GO:0035710", "GO:0046632")
query_1	FALSE	0.374385	157	211	8	0.0379147	0.0509554	GO:1904064	GO:BP	positive regulation of cation transmembrane transport	21100	27061	c("GO:0034767", "GO:0098655", "GO:1904062")
query_1	FALSE	0.374921	396	211	13	0.0616114	0.0328283	GO:0030099	GO:BP	myeloid cell differentiation	21100	7702	c("GO:0030097", "GO:0030154")
query_1	FALSE	0.379452	29	211	4	0.0189573	0.137931	GO:0060142	GO:BP	regulation of syncytium formation by plasma membrane fusion	21100	16942	c("GO:0000768", "GO:0050793", "GO:0051128")
query_1	FALSE	0.402816	877	211	21	0.0995261	0.0239453	GO:0051093	GO:BP	negative regulation of developmental process	21100	15570	c("GO:0032502", "GO:0048519", "GO:0050793")
query_1	FALSE	0.405844	12	211	3	0.014218	0.25	GO:0034135	GO:BP	regulation of toll-like receptor 2 signaling pathway	21100	9703	c("GO:0034121", "GO:0034134")
query_1	FALSE	0.405844	12	211	3	0.014218	0.25	GO:0043383	GO:BP	negative T cell selection	21100	12282	GO:0045058
query_1	FALSE	0.405844	12	211	3	0.014218	0.25	GO:0043320	GO:BP	natural killer cell degranulation	21100	12249	c("GO:0002323", "GO:0042267", "GO:0043299")
query_1	FALSE	0.422302	85	211	6	0.028436	0.0705882	GO:0002312	GO:BP	B cell activation involved in immune response	21100	967	c("GO:0002285", "GO:0042113")
query_1	FALSE	0.427224	203	211	9	0.042654	0.044335	GO:0007204	GO:BP	positive regulation of cytosolic calcium ion concentration	21100	3102	GO:0065008
query_1	FALSE	0.434417	30	211	4	0.0189573	0.133333	GO:0001773	GO:BP	myeloid dendritic cell activation	21100	550	GO:0002274
query_1	FALSE	0.441951	55	211	5	0.0236967	0.0909091	GO:0002711	GO:BP	positive regulation of T cell mediated immunity	21100	1352	c("GO:0002456", "GO:0002708", "GO:0002709", "GO:0002824")
query_1	FALSE	0.450237	86	211	6	0.028436	0.0697674	GO:0050672	GO:BP	negative regulation of lymphocyte proliferation	21100	15258	c("GO:0032945", "GO:0046651", "GO:0050670", "GO:0051250")
query_1	FALSE	0.469427	887	211	21	0.0995261	0.0236753	GO:0043069	GO:BP	negative regulation of programmed cell death	21100	12126	c("GO:0012501", "GO:0043067", "GO:0060548")
query_1	FALSE	0.479606	87	211	6	0.028436	0.0689655	GO:0032945	GO:BP	negative regulation of mononuclear cell proliferation	21100	9136	c("GO:0032943", "GO:0032944", "GO:0070664")
query_1	FALSE	0.481371	56	211	5	0.0236967	0.0892857	GO:0045620	GO:BP	negative regulation of lymphocyte differentiation	21100	13352	c("GO:0030098", "GO:0045619", "GO:0051250", "GO:1902106")
query_1	FALSE	0.494891	31	211	4	0.0189573	0.129032	GO:0043372	GO:BP	positive regulation of CD4-positive, alpha-beta T cell differentiation	21100	12271	c("GO:0043367", "GO:0043370", "GO:0046638", "GO:2000516")
query_1	FALSE	0.494891	31	211	4	0.0189573	0.129032	GO:0043304	GO:BP	regulation of mast cell degranulation	21100	12233	c("GO:0002886", "GO:0033006", "GO:0043300", "GO:0043303", "GO:0060341")
query_1	FALSE	0.507207	124	211	7	0.0331754	0.0564516	GO:0033209	GO:BP	tumor necrosis factor-mediated signaling pathway	21100	9296	c("GO:0019221", "GO:0071356")
query_1	FALSE	0.512747	409	211	13	0.0616114	0.0317848	GO:0045860	GO:BP	positive regulation of protein kinase activity	21100	13574	c("GO:0001934", "GO:0033674", "GO:0045859")
query_1	FALSE	0.523712	13	211	3	0.014218	0.230769	GO:0002475	GO:BP	antigen processing and presentation via MHC class Ib	21100	1121	GO:0019882
query_1	FALSE	0.523712	13	211	3	0.014218	0.230769	GO:0002664	GO:BP	regulation of T cell tolerance induction	21100	1305	c("GO:0002517", "GO:0002643")
query_1	FALSE	0.523712	13	211	3	0.014218	0.230769	GO:0070486	GO:BP	leukocyte aggregation	21100	18890	GO:0007159
query_1	FALSE	0.542859	89	211	6	0.028436	0.0674157	GO:0033627	GO:BP	cell adhesion mediated by integrin	21100	9569	GO:0007155
query_1	FALSE	0.547673	358	211	12	0.056872	0.0335196	GO:1904062	GO:BP	regulation of cation transmembrane transport	21100	27059	c("GO:0034765", "GO:0098655")
query_1	FALSE	0.561185	32	211	4	0.0189573	0.125	GO:0032673	GO:BP	regulation of interleukin-4 production	21100	8918	c("GO:0001817", "GO:0032633")
query_1	FALSE	0.561185	32	211	4	0.0189573	0.125	GO:0032633	GO:BP	interleukin-4 production	21100	8878	GO:0001816
query_1	FALSE	0.575076	308	211	11	0.0521327	0.0357143	GO:0019932	GO:BP	second-messenger-mediated signaling	21100	7017	GO:0035556
query_1	FALSE	0.576849	90	211	6	0.028436	0.0666667	GO:0061097	GO:BP	regulation of protein tyrosine kinase activity	21100	17839	c("GO:0045859", "GO:0050730")
query_1	FALSE	0.588872	3083	211	50	0.236967	0.016218	GO:0051173	GO:BP	positive regulation of nitrogen compound metabolic process	21100	15642	c("GO:0006807", "GO:0009893", "GO:0051171")
query_1	FALSE	0.593131	1528	211	30	0.14218	0.0196335	GO:0055085	GO:BP	transmembrane transport	21100	16788	c("GO:0006810", "GO:0009987")
query_1	FALSE	0.593241	3	211	2	0.00947867	0.666667	GO:0002477	GO:BP	antigen processing and presentation of exogenous peptide antigen via MHC class Ib	21100	1123	c("GO:0002428", "GO:0002478")
query_1	FALSE	0.593241	3	211	2	0.00947867	0.666667	GO:0002277	GO:BP	myeloid dendritic cell activation involved in immune response	21100	932	c("GO:0001773", "GO:0002275")
query_1	FALSE	0.633619	33	211	4	0.0189573	0.121212	GO:0043552	GO:BP	positive regulation of phosphatidylinositol 3-kinase activity	21100	12399	c("GO:0043551", "GO:0090218")
query_1	FALSE	0.633619	33	211	4	0.0189573	0.121212	GO:0036336	GO:BP	dendritic cell migration	21100	11022	GO:0071674
query_1	FALSE	0.633619	33	211	4	0.0189573	0.121212	GO:0050858	GO:BP	negative regulation of antigen receptor-mediated signaling pathway	21100	15377	c("GO:0002683", "GO:0009968", "GO:0050851", "GO:0050854")
query_1	FALSE	0.633619	33	211	4	0.0189573	0.121212	GO:0033006	GO:BP	regulation of mast cell activation involved in immune response	21100	9182	c("GO:0002279", "GO:0002699", "GO:0033003", "GO:0050776")
query_1	FALSE	0.641744	312	211	11	0.0521327	0.0352564	GO:1901214	GO:BP	regulation of neuron death	21100	24533	c("GO:0010941", "GO:0070997")
query_1	FALSE	0.661637	14	211	3	0.014218	0.214286	GO:0045059	GO:BP	positive thymic T cell selection	21100	13104	c("GO:0043368", "GO:0045061")
query_1	FALSE	0.661637	14	211	3	0.014218	0.214286	GO:0070234	GO:BP	positive regulation of T cell apoptotic process	21100	18735	c("GO:0070230", "GO:0070231", "GO:0070232")
query_1	FALSE	0.661637	14	211	3	0.014218	0.214286	GO:0046131	GO:BP	pyrimidine ribonucleoside metabolic process	21100	13831	c("GO:0006213", "GO:0009119")
query_1	FALSE	0.661637	14	211	3	0.014218	0.214286	GO:0046133	GO:BP	pyrimidine ribonucleoside catabolic process	21100	13833	c("GO:0042454", "GO:0046131", "GO:0046135")
query_1	FALSE	0.661637	14	211	3	0.014218	0.214286	GO:0002467	GO:BP	germinal center formation	21100	1113	c("GO:0002460", "GO:0048646")
query_1	FALSE	0.66636	60	211	5	0.0236967	0.0833333	GO:0034113	GO:BP	heterotypic cell-cell adhesion	21100	9681	GO:0098609
query_1	FALSE	0.668407	171	211	8	0.0379147	0.0467836	GO:0034767	GO:BP	positive regulation of ion transmembrane transport	21100	10043	c("GO:0034220", "GO:0034764", "GO:0034765", "GO:0043270")
query_1	FALSE	0.676851	130	211	7	0.0331754	0.0538462	GO:0019079	GO:BP	viral genome replication	21100	6436	c("GO:0016032", "GO:0019058")
query_1	FALSE	0.679719	1046	211	23	0.109005	0.0219885	GO:0051130	GO:BP	positive regulation of cellular component organization	21100	15600	c("GO:0016043", "GO:0048522", "GO:0051128")
query_1	FALSE	0.688931	93	211	6	0.028436	0.0645161	GO:0048525	GO:BP	negative regulation of viral process	21100	14847	c("GO:0016032", "GO:0048519", "GO:0050792")
query_1	FALSE	0.712514	34	211	4	0.0189573	0.117647	GO:0150077	GO:BP	regulation of neuroinflammatory response	21100	23268	c("GO:0050727", "GO:0150076")
query_1	FALSE	0.725797	786	211	19	0.0900474	0.024173	GO:0032940	GO:BP	secretion by cell	21100	9132	c("GO:0046903", "GO:0140352")
query_1	FALSE	0.729852	94	211	6	0.028436	0.0638298	GO:0001776	GO:BP	leukocyte homeostasis	21100	553	c("GO:0002376", "GO:0048872")
query_1	FALSE	0.729852	94	211	6	0.028436	0.0638298	GO:0034109	GO:BP	homotypic cell-cell adhesion	21100	9677	GO:0098609
query_1	FALSE	0.742539	3031	211	49	0.232227	0.0161663	GO:0051641	GO:BP	cellular localization	21100	16000	c("GO:0009987", "GO:0051179")
query_1	FALSE	0.762462	1551	211	30	0.14218	0.0193424	GO:0006811	GO:BP	ion transport	21100	2767	GO:0006810
query_1	FALSE	0.77265	95	211	6	0.028436	0.0631579	GO:0032755	GO:BP	positive regulation of interleukin-6 production	21100	9000	c("GO:0001819", "GO:0032635", "GO:0032675")
query_1	FALSE	0.798193	35	211	4	0.0189573	0.114286	GO:0034110	GO:BP	regulation of homotypic cell-cell adhesion	21100	9678	c("GO:0022407", "GO:0034109")
query_1	FALSE	0.798193	35	211	4	0.0189573	0.114286	GO:0002335	GO:BP	mature B cell differentiation	21100	990	GO:0030183
query_1	FALSE	0.798193	35	211	4	0.0189573	0.114286	GO:0050869	GO:BP	negative regulation of B cell activation	21100	15388	c("GO:0042113", "GO:0050864", "GO:0051250")
query_1	FALSE	0.798567	221	211	9	0.042654	0.040724	GO:0072593	GO:BP	reactive oxygen species metabolic process	21100	20348	GO:0044237
query_1	FALSE	0.820962	15	211	3	0.014218	0.2	GO:0043374	GO:BP	CD8-positive, alpha-beta T cell differentiation	21100	12273	c("GO:0036037", "GO:0046632")
query_1	FALSE	0.837062	63	211	5	0.0236967	0.0793651	GO:2000401	GO:BP	regulation of lymphocyte migration	21100	29620	c("GO:0071675", "GO:0072676")
query_1	FALSE	0.890984	36	211	4	0.0189573	0.111111	GO:0070232	GO:BP	regulation of T cell apoptotic process	21100	18733	c("GO:0070228", "GO:0070231")
query_1	FALSE	0.895465	491	211	14	0.0663507	0.0285132	GO:0090066	GO:BP	regulation of anatomical structure size	21100	21090	GO:0065008
query_1	FALSE	0.898535	1493	211	29	0.137441	0.019424	GO:0051247	GO:BP	positive regulation of protein metabolic process	21100	15702	c("GO:0010604", "GO:0019538", "GO:0051173", "GO:0051246")
query_1	FALSE	0.900016	999	211	22	0.104265	0.022022	GO:0031401	GO:BP	positive regulation of protein modification process	21100	8299	c("GO:0006464", "GO:0031399", "GO:0032270")
query_1	FALSE	0.939309	226	211	9	0.042654	0.039823	GO:0007596	GO:BP	blood coagulation	21100	3457	c("GO:0007599", "GO:0042060", "GO:0050817")
query_1	FALSE	0.950079	869	211	20	0.0947867	0.023015	GO:0043066	GO:BP	negative regulation of apoptotic process	21100	12123	c("GO:0006915", "GO:0042981", "GO:0043069")
query_1	FALSE	0.967913	65	211	5	0.0236967	0.0769231	GO:2000514	GO:BP	regulation of CD4-positive, alpha-beta T cell activation	21100	29727	c("GO:0035710", "GO:0046634")
query_1	FALSE	0.969768	227	211	9	0.042654	0.0396476	GO:0046777	GO:BP	protein autophosphorylation	21100	14353	GO:0006468
query_1	FALSE	0.991215	37	211	4	0.0189573	0.108108	GO:2000516	GO:BP	positive regulation of CD4-positive, alpha-beta T cell activation	21100	29729	c("GO:0035710", "GO:0046635", "GO:2000514")
query_1	FALSE	0.991215	37	211	4	0.0189573	0.108108	GO:0090218	GO:BP	positive regulation of lipid kinase activity	21100	21231	c("GO:0033674", "GO:0043550", "GO:0045834")
query_1	FALSE	1	3	211	1	0.00473934	0.333333	GO:1901740	GO:BP	negative regulation of myoblast fusion	21100	25004	c("GO:0007520", "GO:0034242", "GO:1901739")
query_1	FALSE	1	14	211	1	0.00473934	0.0714286	GO:1901678	GO:BP	iron coordination entity transport	21100	24952	GO:0006826
query_1	FALSE	1	10	211	1	0.00473934	0.1	GO:1901731	GO:BP	positive regulation of platelet aggregation	21100	24995	c("GO:0034112", "GO:0070527", "GO:0090330")
query_1	FALSE	1	51	211	1	0.00473934	0.0196078	GO:1901799	GO:BP	negative regulation of proteasomal protein catabolic process	21100	25063	c("GO:0010498", "GO:0061136", "GO:1903051")
query_1	FALSE	1	29	211	1	0.00473934	0.0344828	GO:1901798	GO:BP	positive regulation of signal transduction by p53 class mediator	21100	25062	c("GO:0072331", "GO:1901796", "GO:1902533")
query_1	FALSE	1	81	211	3	0.014218	0.037037	GO:1901657	GO:BP	glycosyl compound metabolic process	21100	24933	GO:1901135
query_1	FALSE	1	98	211	1	0.00473934	0.0102041	GO:1901655	GO:BP	cellular response to ketone	21100	24931	c("GO:1901654", "GO:1901701")
query_1	FALSE	1	16	211	2	0.00947867	0.125	GO:1901741	GO:BP	positive regulation of myoblast fusion	21100	25005	c("GO:0007520", "GO:0060143", "GO:1901739")
query_1	FALSE	1	1100	211	13	0.0616114	0.0118182	GO:1901698	GO:BP	response to nitrogen compound	21100	24964	GO:0042221
query_1	FALSE	1	683	211	8	0.0379147	0.011713	GO:1901699	GO:BP	cellular response to nitrogen compound	21100	24965	c("GO:0070887", "GO:1901698")
query_1	FALSE	1	33	211	3	0.014218	0.0909091	GO:1901658	GO:BP	glycosyl compound catabolic process	21100	24934	c("GO:1901136", "GO:1901657")
query_1	FALSE	1	8	211	1	0.00473934	0.125	GO:0097021	GO:BP	lymphocyte migration into lymphoid organs	21100	21600	GO:0072676
query_1	FALSE	1	14	211	1	0.00473934	0.0714286	GO:1901857	GO:BP	positive regulation of cellular respiration	21100	25121	c("GO:0031325", "GO:0043457", "GO:0045333")
query_1	FALSE	1	104	211	1	0.00473934	0.00961538	GO:1901796	GO:BP	regulation of signal transduction by p53 class mediator	21100	25060	c("GO:0072331", "GO:1902531")
query_1	FALSE	1	93	211	1	0.00473934	0.0107527	GO:1901879	GO:BP	regulation of protein depolymerization	21100	25143	c("GO:0043244", "GO:0051261")
query_1	FALSE	1	619	211	10	0.0473934	0.0161551	GO:0120035	GO:BP	regulation of plasma membrane bounded cell projection organization	21100	22776	c("GO:0031344", "GO:0120036")
query_1	FALSE	1	349	211	5	0.0236967	0.0143266	GO:1901653	GO:BP	cellular response to peptide	21100	24929	c("GO:0071417", "GO:1901652", "GO:1901701")
query_1	FALSE	1	8461	211	68	0.322275	0.00803688	GO:1901360	GO:BP	organic cyclic compound metabolic process	21100	24665	GO:0071704
query_1	FALSE	1	530	211	12	0.056872	0.0226415	GO:1901361	GO:BP	organic cyclic compound catabolic process	21100	24666	c("GO:1901360", "GO:1901575")
query_1	FALSE	1	4213	211	52	0.246445	0.0123427	GO:1901362	GO:BP	organic cyclic compound biosynthetic process	21100	24667	c("GO:1901360", "GO:1901576")
query_1	FALSE	1	2	211	1	0.00473934	0.5	GO:1901502	GO:BP	ether catabolic process	21100	24797	c("GO:0018904", "GO:1901575")
query_1	FALSE	1	5	211	1	0.00473934	0.2	GO:1901509	GO:BP	regulation of endothelial tube morphogenesis	21100	24803	c("GO:0061154", "GO:1905330")
query_1	FALSE	1	56	211	2	0.00947867	0.0357143	GO:1901532	GO:BP	regulation of hematopoietic progenitor cell differentiation	21100	24822	c("GO:0002244", "GO:0045595")
query_1	FALSE	1	6446	211	84	0.398104	0.0130313	GO:1901564	GO:BP	organonitrogen compound metabolic process	21100	24853	c("GO:0006807", "GO:0071704")
query_1	FALSE	1	296	211	2	0.00947867	0.00675676	GO:0097193	GO:BP	intrinsic apoptotic signaling pathway	21100	21697	c("GO:0035556", "GO:0097190")
query_1	FALSE	1	1350	211	19	0.0900474	0.0140741	GO:1901565	GO:BP	organonitrogen compound catabolic process	21100	24854	c("GO:1901564", "GO:1901575")
query_1	FALSE	1	1708	211	14	0.0663507	0.00819672	GO:1901566	GO:BP	organonitrogen compound biosynthetic process	21100	24855	c("GO:1901564", "GO:1901576")
query_1	FALSE	1	223	211	5	0.0236967	0.0224215	GO:0097191	GO:BP	extrinsic apoptotic signaling pathway	21100	21695	c("GO:0007166", "GO:0097190")
query_1	FALSE	1	2103	211	27	0.127962	0.0128388	GO:1901575	GO:BP	organic substance catabolic process	21100	24863	c("GO:0009056", "GO:0071704")
query_1	FALSE	1	5774	211	64	0.303318	0.0110842	GO:1901576	GO:BP	organic substance biosynthetic process	21100	24864	c("GO:0009058", "GO:0071704")
query_1	FALSE	1	205	211	4	0.0189573	0.0195122	GO:1901605	GO:BP	alpha-amino acid metabolic process	21100	24886	GO:0006520
query_1	FALSE	1	592	211	10	0.0473934	0.0168919	GO:0097190	GO:BP	apoptotic signaling pathway	21100	21694	c("GO:0006915", "GO:0007165")
query_1	FALSE	1	94	211	2	0.00947867	0.0212766	GO:1901606	GO:BP	alpha-amino acid catabolic process	21100	24887	c("GO:0016054", "GO:1901565", "GO:1901605")
query_1	FALSE	1	29	211	1	0.00473934	0.0344828	GO:0097066	GO:BP	response to thyroid hormone	21100	21632	GO:0009725
query_1	FALSE	1	4	211	1	0.00473934	0.25	GO:0097022	GO:BP	lymphocyte migration into lymph node	21100	21601	GO:0097021
query_1	FALSE	1	477	211	7	0.0331754	0.0146751	GO:1901652	GO:BP	response to peptide	21100	24928	c("GO:0010243", "GO:1901700")
query_1	FALSE	1	3	211	1	0.00473934	0.333333	GO:1901624	GO:BP	negative regulation of lymphocyte chemotaxis	21100	24902	c("GO:0002689", "GO:0048247", "GO:1901623", "GO:2000402")
query_1	FALSE	1	3	211	1	0.00473934	0.333333	GO:0097026	GO:BP	dendritic cell dendrite assembly	21100	21602	GO:0120031
query_1	FALSE	1	46	211	4	0.0189573	0.0869565	GO:0097028	GO:BP	dendritic cell differentiation	21100	21603	GO:1903131
query_1	FALSE	1	236	211	5	0.0236967	0.0211864	GO:1901617	GO:BP	organic hydroxy compound biosynthetic process	21100	24896	c("GO:1901576", "GO:1901615")
query_1	FALSE	1	193	211	4	0.0189573	0.0207254	GO:1901654	GO:BP	response to ketone	21100	24930	c("GO:0010033", "GO:1901700")
query_1	FALSE	1	559	211	7	0.0331754	0.0125224	GO:1901615	GO:BP	organic hydroxy compound metabolic process	21100	24894	GO:0071704
query_1	FALSE	1	63	211	1	0.00473934	0.015873	GO:0097035	GO:BP	regulation of membrane lipid distribution	21100	21609	c("GO:0061024", "GO:0065008")
query_1	FALSE	1	3	211	1	0.00473934	0.333333	GO:0097037	GO:BP	heme export	21100	21611	GO:0015886
query_1	FALSE	1	19	211	1	0.00473934	0.0526316	GO:1901881	GO:BP	positive regulation of protein depolymerization	21100	25145	c("GO:0043243", "GO:0051261", "GO:1901879")
query_1	FALSE	1	10	211	2	0.00947867	0.2	GO:0097048	GO:BP	dendritic cell apoptotic process	21100	21619	GO:0071887
query_1	FALSE	1	79	211	2	0.00947867	0.0253165	GO:0097061	GO:BP	dendritic spine organization	21100	21628	c("GO:0099173", "GO:0106027")
query_1	FALSE	1	71	211	1	0.00473934	0.0140845	GO:1901607	GO:BP	alpha-amino acid biosynthetic process	21100	24888	c("GO:0008652", "GO:1901605")
query_1	FALSE	1	4	211	1	0.00473934	0.25	GO:0097029	GO:BP	mature conventional dendritic cell differentiation	21100	21604	c("GO:0002573", "GO:0097028")
query_1	FALSE	1	200	211	2	0.00947867	0.01	GO:1901888	GO:BP	regulation of cell junction assembly	21100	25152	c("GO:0034329", "GO:0044087", "GO:0051128")
query_1	FALSE	1	48	211	1	0.00473934	0.0208333	GO:1902108	GO:BP	regulation of mitochondrial membrane permeability involved in apoptotic process	21100	25358	c("GO:0008637", "GO:0046902")
query_1	FALSE	1	414	211	7	0.0331754	0.0169082	GO:1901987	GO:BP	regulation of cell cycle phase transition	21100	25245	c("GO:0010564", "GO:0044770")
query_1	FALSE	1	53	211	2	0.00947867	0.0377358	GO:1902743	GO:BP	regulation of lamellipodium organization	21100	25878	c("GO:0097581", "GO:0120035")
query_1	FALSE	1	41	211	1	0.00473934	0.0243902	GO:1902742	GO:BP	apoptotic process involved in development	21100	25877	c("GO:0006915", "GO:0048856")
query_1	FALSE	1	44	211	1	0.00473934	0.0227273	GO:1902686	GO:BP	mitochondrial outer membrane permeabilization involved in programmed cell death	21100	25836	c("GO:0012501", "GO:0035794")
query_1	FALSE	1	1642	211	25	0.118483	0.0152253	GO:1902680	GO:BP	positive regulation of RNA biosynthetic process	21100	25830	c("GO:0010557", "GO:0031328", "GO:0032774", "GO:0051254", "GO:2001141")
query_1	FALSE	1	1297	211	12	0.056872	0.00925212	GO:1902679	GO:BP	negative regulation of RNA biosynthetic process	21100	25829	c("GO:0010558", "GO:0031327", "GO:0032774", "GO:0051253", "GO:2001141")
query_1	FALSE	1	16	211	1	0.00473934	0.0625	GO:0090336	GO:BP	positive regulation of brown fat cell differentiation	21100	21347	c("GO:0045600", "GO:0050873", "GO:0090335")
query_1	FALSE	1	2	211	1	0.00473934	0.5	GO:1902631	GO:BP	negative regulation of membrane hyperpolarization	21100	25792	c("GO:0048519", "GO:0060081", "GO:1902630")
query_1	FALSE	1	26	211	1	0.00473934	0.0384615	GO:0090382	GO:BP	phagosome maturation	21100	21391	GO:0006996
query_1	FALSE	1	3	211	1	0.00473934	0.333333	GO:1902630	GO:BP	regulation of membrane hyperpolarization	21100	25791	c("GO:0042391", "GO:0050789", "GO:0060081")
query_1	FALSE	1	33	211	2	0.00947867	0.0606061	GO:1902624	GO:BP	positive regulation of neutrophil migration	21100	25785	c("GO:0002687", "GO:1902622", "GO:1990266")
query_1	FALSE	1	45	211	3	0.014218	0.0666667	GO:1902622	GO:BP	regulation of neutrophil migration	21100	25783	c("GO:0002685", "GO:1990266")
query_1	FALSE	1	140	211	1	0.00473934	0.00714286	GO:1902600	GO:BP	proton transmembrane transport	21100	25761	GO:0098662
query_1	FALSE	1	83	211	1	0.00473934	0.0120482	GO:0090398	GO:BP	cellular senescence	21100	21404	c("GO:0033554", "GO:0044237")
query_1	FALSE	1	561	211	8	0.0379147	0.0142602	GO:0090407	GO:BP	organophosphate biosynthetic process	21100	21410	c("GO:0019637", "GO:1901576")
query_1	FALSE	1	61	211	1	0.00473934	0.0163934	GO:0090497	GO:BP	mesenchymal cell migration	21100	21462	GO:0001667
query_1	FALSE	1	37	211	1	0.00473934	0.027027	GO:1902745	GO:BP	positive regulation of lamellipodium organization	21100	25880	c("GO:0031346", "GO:0097581", "GO:1902743")
query_1	FALSE	1	6	211	1	0.00473934	0.166667	GO:1902565	GO:BP	positive regulation of neutrophil activation	21100	25735	c("GO:0002696", "GO:0042119", "GO:1902563")
query_1	FALSE	1	129	211	3	0.014218	0.0232558	GO:1902749	GO:BP	regulation of cell cycle G2/M phase transition	21100	25884	c("GO:0044839", "GO:1901987")
query_1	FALSE	1	168	211	4	0.0189573	0.0238095	GO:1902806	GO:BP	regulation of cell cycle G1/S phase transition	21100	25937	c("GO:0044843", "GO:1901987")
query_1	FALSE	1	374	211	6	0.028436	0.0160428	GO:1902903	GO:BP	regulation of supramolecular fiber organization	21100	26026	c("GO:0051128", "GO:0097435")
query_1	FALSE	1	31	211	1	0.00473934	0.0322581	GO:0090312	GO:BP	positive regulation of protein deacetylation	21100	21323	c("GO:0006476", "GO:0031401", "GO:0090311")
query_1	FALSE	1	35	211	1	0.00473934	0.0285714	GO:0090313	GO:BP	regulation of protein targeting to membrane	21100	21324	c("GO:0006612", "GO:1903533", "GO:1905475")
query_1	FALSE	1	29	211	1	0.00473934	0.0344828	GO:0090314	GO:BP	positive regulation of protein targeting to membrane	21100	21325	c("GO:0006612", "GO:0090313", "GO:0090316", "GO:1905477")
query_1	FALSE	1	161	211	5	0.0236967	0.0310559	GO:0090316	GO:BP	positive regulation of intracellular protein transport	21100	21327	c("GO:0006886", "GO:0032388", "GO:0033157", "GO:0051222")
query_1	FALSE	1	29	211	3	0.014218	0.103448	GO:0090322	GO:BP	regulation of superoxide metabolic process	21100	21333	c("GO:0006801", "GO:2000377")
query_1	FALSE	1	28	211	3	0.014218	0.107143	GO:0090330	GO:BP	regulation of platelet aggregation	21100	21341	c("GO:0010543", "GO:0034110", "GO:0070527")
query_1	FALSE	1	12	211	1	0.00473934	0.0833333	GO:0090331	GO:BP	negative regulation of platelet aggregation	21100	21342	c("GO:0010544", "GO:0034111", "GO:0070527", "GO:0090330")
query_1	FALSE	1	22	211	1	0.00473934	0.0454545	GO:0090335	GO:BP	regulation of brown fat cell differentiation	21100	21346	c("GO:0045598", "GO:0050873")
query_1	FALSE	1	19	211	1	0.00473934	0.0526316	GO:1902894	GO:BP	negative regulation of miRNA transcription	21100	26017	c("GO:0045892", "GO:0061614", "GO:1902893")
query_1	FALSE	1	60	211	1	0.00473934	0.0166667	GO:1902893	GO:BP	regulation of miRNA transcription	21100	26016	c("GO:0006355", "GO:0061614")
query_1	FALSE	1	90	211	2	0.00947867	0.0222222	GO:1902882	GO:BP	regulation of response to oxidative stress	21100	26005	c("GO:0006979", "GO:0080134")
query_1	FALSE	1	157	211	1	0.00473934	0.00636943	GO:1902850	GO:BP	microtubule cytoskeleton organization involved in mitosis	21100	25976	c("GO:0000226", "GO:1903047")
query_1	FALSE	1	58	211	1	0.00473934	0.0172414	GO:1902808	GO:BP	positive regulation of cell cycle G1/S phase transition	21100	25939	c("GO:0044843", "GO:1901989", "GO:1902806")
query_1	FALSE	1	82	211	3	0.014218	0.0365854	GO:1902807	GO:BP	negative regulation of cell cycle G1/S phase transition	21100	25938	c("GO:0044843", "GO:1901988", "GO:1902806")
query_1	FALSE	1	83	211	3	0.014218	0.0361446	GO:1902750	GO:BP	negative regulation of cell cycle G2/M phase transition	21100	25885	c("GO:0044839", "GO:1901988", "GO:1902749")
query_1	FALSE	1	156	211	2	0.00947867	0.0128205	GO:0090501	GO:BP	RNA phosphodiester bond hydrolysis	21100	21464	c("GO:0016070", "GO:0090305")
query_1	FALSE	1	14	211	1	0.00473934	0.0714286	GO:1902563	GO:BP	regulation of neutrophil activation	21100	25733	c("GO:0002694", "GO:0042119")
query_1	FALSE	1	508	211	13	0.0616114	0.0255906	GO:1902532	GO:BP	negative regulation of intracellular signal transduction	21100	25712	c("GO:0009968", "GO:0035556", "GO:1902531")
query_1	FALSE	1	42	211	1	0.00473934	0.0238095	GO:1902110	GO:BP	positive regulation of mitochondrial membrane permeability involved in apoptotic process	21100	25360	c("GO:1902108", "GO:1902686")
query_1	FALSE	1	29	211	1	0.00473934	0.0344828	GO:1902042	GO:BP	negative regulation of extrinsic apoptotic signaling pathway via death domain receptors	21100	25299	c("GO:0008625", "GO:1902041", "GO:2001237")
query_1	FALSE	1	48	211	1	0.00473934	0.0208333	GO:1902041	GO:BP	regulation of extrinsic apoptotic signaling pathway via death domain receptors	21100	25298	c("GO:0008625", "GO:2001236")
query_1	FALSE	1	37	211	2	0.00947867	0.0540541	GO:1902036	GO:BP	regulation of hematopoietic stem cell differentiation	21100	25293	c("GO:0060218", "GO:1901532", "GO:2000736")
query_1	FALSE	1	3	211	1	0.00473934	0.333333	GO:0090679	GO:BP	cell differentiation involved in phenotypic switching	21100	21559	c("GO:0030154", "GO:0090677")
query_1	FALSE	1	9	211	1	0.00473934	0.111111	GO:1902033	GO:BP	regulation of hematopoietic stem cell proliferation	21100	25290	c("GO:0071425", "GO:0072091")
query_1	FALSE	1	18	211	1	0.00473934	0.0555556	GO:1902004	GO:BP	positive regulation of amyloid-beta formation	21100	25262	c("GO:0034205", "GO:0034250", "GO:1902003", "GO:1902993")
query_1	FALSE	1	70	211	1	0.00473934	0.0142857	GO:0097006	GO:BP	regulation of plasma lipoprotein particle levels	21100	21592	GO:0050789
query_1	FALSE	1	11	211	1	0.00473934	0.0909091	GO:0097011	GO:BP	cellular response to granulocyte macrophage colony-stimulating factor stimulus	21100	21595	c("GO:0071345", "GO:0097012")
query_1	FALSE	1	35	211	1	0.00473934	0.0285714	GO:1902003	GO:BP	regulation of amyloid-beta formation	21100	25261	c("GO:0034205", "GO:0034248", "GO:1902991")
query_1	FALSE	1	191	211	6	0.028436	0.0314136	GO:1901991	GO:BP	negative regulation of mitotic cell cycle phase transition	21100	25249	c("GO:0044772", "GO:0045930", "GO:1901988", "GO:1901990")
query_1	FALSE	1	320	211	6	0.028436	0.01875	GO:1901990	GO:BP	regulation of mitotic cell cycle phase transition	21100	25248	c("GO:0007346", "GO:0044772", "GO:1901987")
query_1	FALSE	1	116	211	1	0.00473934	0.00862069	GO:1901989	GO:BP	positive regulation of cell cycle phase transition	21100	25247	c("GO:0044770", "GO:0090068", "GO:1901987")
query_1	FALSE	1	11	211	1	0.00473934	0.0909091	GO:0097012	GO:BP	response to granulocyte macrophage colony-stimulating factor	21100	21596	GO:0034097
query_1	FALSE	1	261	211	6	0.028436	0.0229885	GO:1901988	GO:BP	negative regulation of cell cycle phase transition	21100	25246	c("GO:0010948", "GO:0044770", "GO:1901987")
query_1	FALSE	1	203	211	2	0.00947867	0.00985222	GO:1902115	GO:BP	regulation of organelle assembly	21100	25365	c("GO:0033043", "GO:0044087", "GO:0070925")
query_1	FALSE	1	43	211	1	0.00473934	0.0232558	GO:1902116	GO:BP	negative regulation of organelle assembly	21100	25366	c("GO:0010639", "GO:0070925", "GO:1902115")
query_1	FALSE	1	5	211	1	0.00473934	0.2	GO:0090677	GO:BP	reversible differentiation	21100	21557	GO:0036166
query_1	FALSE	1	115	211	3	0.014218	0.026087	GO:0090630	GO:BP	activation of GTPase activity	21100	21528	GO:0043547
query_1	FALSE	1	7	211	1	0.00473934	0.142857	GO:1902412	GO:BP	regulation of mitotic cytokinesis	21100	25628	c("GO:0000281", "GO:0032465")
query_1	FALSE	1	25	211	1	0.00473934	0.04	GO:1902410	GO:BP	mitotic cytokinetic process	21100	25627	c("GO:0000281", "GO:0032506", "GO:1903047")
query_1	FALSE	1	42	211	2	0.00947867	0.047619	GO:0090503	GO:BP	RNA phosphodiester bond hydrolysis, exonucleolytic	21100	21466	GO:0090501
query_1	FALSE	1	69	211	1	0.00473934	0.0144928	GO:1902373	GO:BP	negative regulation of mRNA catabolic process	21100	25599	c("GO:0006402", "GO:0010628", "GO:0061013", "GO:1902369", "GO:1903312")
query_1	FALSE	1	16	211	1	0.00473934	0.0625	GO:0090520	GO:BP	sphingolipid mediated signaling pathway	21100	21481	GO:0007165
query_1	FALSE	1	81	211	1	0.00473934	0.0123457	GO:1902369	GO:BP	negative regulation of RNA catabolic process	21100	25595	c("GO:0006401", "GO:0031330", "GO:0051253")
query_1	FALSE	1	76	211	1	0.00473934	0.0131579	GO:0090559	GO:BP	regulation of membrane permeability	21100	21500	GO:0065008
query_1	FALSE	1	105	211	1	0.00473934	0.00952381	GO:1901890	GO:BP	positive regulation of cell junction assembly	21100	25154	c("GO:0034329", "GO:0044089", "GO:0051130", "GO:1901888")
query_1	FALSE	1	6	211	1	0.00473934	0.166667	GO:1902339	GO:BP	positive regulation of apoptotic process involved in morphogenesis	21100	25567	c("GO:0060561", "GO:1902337", "GO:1904747")
query_1	FALSE	1	37	211	1	0.00473934	0.027027	GO:1902284	GO:BP	neuron projection extension involved in neuron projection guidance	21100	25519	c("GO:0097485", "GO:1990138")
query_1	FALSE	1	20	211	1	0.00473934	0.05	GO:1902176	GO:BP	negative regulation of oxidative stress-induced intrinsic apoptotic signaling pathway	21100	25417	c("GO:0008631", "GO:1902175", "GO:1903202", "GO:2001243")
query_1	FALSE	1	29	211	1	0.00473934	0.0344828	GO:1902175	GO:BP	regulation of oxidative stress-induced intrinsic apoptotic signaling pathway	21100	25416	c("GO:0008631", "GO:1903201", "GO:2001242")
query_1	FALSE	1	280	211	2	0.00947867	0.00714286	GO:0090596	GO:BP	sensory organ morphogenesis	21100	21507	c("GO:0007423", "GO:0009887")
query_1	FALSE	1	4	211	1	0.00473934	0.25	GO:1902164	GO:BP	positive regulation of DNA damage response, signal transduction by p53 class mediator resulting in transcription of p21 class mediator	21100	25405	c("GO:0006978", "GO:0043517", "GO:1902162")
query_1	FALSE	1	5	211	1	0.00473934	0.2	GO:1902162	GO:BP	regulation of DNA damage response, signal transduction by p53 class mediator resulting in transcription of p21 class mediator	21100	25403	c("GO:0006978", "GO:0043516")
query_1	FALSE	1	80	211	1	0.00473934	0.0125	GO:1902117	GO:BP	positive regulation of organelle assembly	21100	25367	c("GO:0010638", "GO:0044089", "GO:0070925", "GO:1902115")
query_1	FALSE	1	13	211	1	0.00473934	0.0769231	GO:1902337	GO:BP	regulation of apoptotic process involved in morphogenesis	21100	25565	c("GO:0060561", "GO:1904748")
query_1	FALSE	1	105	211	3	0.014218	0.0285714	GO:1901343	GO:BP	negative regulation of vasculature development	21100	24649	c("GO:0001944", "GO:0051093", "GO:0051241", "GO:1901342")
query_1	FALSE	1	42	211	2	0.00947867	0.047619	GO:0097300	GO:BP	programmed necrotic cell death	21100	21758	c("GO:0012501", "GO:0070265")
query_1	FALSE	1	83	211	2	0.00947867	0.0240964	GO:0097194	GO:BP	execution phase of apoptosis	21100	21698	c("GO:0006915", "GO:0009987")
query_1	FALSE	1	85	211	2	0.00947867	0.0235294	GO:0099175	GO:BP	regulation of postsynapse organization	21100	22299	c("GO:0050807", "GO:0099173")
query_1	FALSE	1	442	211	7	0.0331754	0.0158371	GO:0099177	GO:BP	regulation of trans-synaptic signaling	21100	22301	c("GO:0010646", "GO:0023051", "GO:0099537")
query_1	FALSE	1	22	211	1	0.00473934	0.0454545	GO:0099500	GO:BP	vesicle fusion to plasma membrane	21100	22314	c("GO:0006906", "GO:0140029")
query_1	FALSE	1	190	211	3	0.014218	0.0157895	GO:0099504	GO:BP	synaptic vesicle cycle	21100	22316	c("GO:0051649", "GO:0099003")
query_1	FALSE	1	20	211	1	0.00473934	0.05	GO:0099515	GO:BP	actin filament-based transport	21100	22321	GO:0030705
query_1	FALSE	1	70	211	1	0.00473934	0.0142857	GO:0099518	GO:BP	vesicle cytoskeletal trafficking	21100	22323	c("GO:0030705", "GO:0051650")
query_1	FALSE	1	472	211	6	0.028436	0.0127119	GO:0198738	GO:BP	cell-cell signaling by wnt	21100	23351	GO:0007267
query_1	FALSE	1	740	211	9	0.042654	0.0121622	GO:0099536	GO:BP	synaptic signaling	21100	22331	GO:0007267
query_1	FALSE	1	21	211	3	0.014218	0.142857	GO:0150146	GO:BP	cell junction disassembly	21100	23306	c("GO:0022411", "GO:0034330")
query_1	FALSE	1	717	211	9	0.042654	0.0125523	GO:0099537	GO:BP	trans-synaptic signaling	21100	22332	GO:0099536
query_1	FALSE	1	3	211	1	0.00473934	0.333333	GO:0150102	GO:BP	negative regulation of monocyte activation	21100	23280	c("GO:0002694", "GO:0042117")
query_1	FALSE	1	4	211	1	0.00473934	0.25	GO:0150098	GO:BP	glial cell-neuron signaling	21100	23277	GO:0007267
query_1	FALSE	1	14	211	2	0.00947867	0.142857	GO:0150079	GO:BP	negative regulation of neuroinflammatory response	21100	23270	c("GO:0050728", "GO:0150076", "GO:0150077")
query_1	FALSE	1	103	211	2	0.00947867	0.0194175	GO:0099587	GO:BP	inorganic ion import across plasma membrane	21100	22368	c("GO:0098657", "GO:0098660", "GO:0098739")
query_1	FALSE	1	15	211	2	0.00947867	0.133333	GO:0150078	GO:BP	positive regulation of neuroinflammatory response	21100	23269	c("GO:0050729", "GO:0150076", "GO:0150077")
query_1	FALSE	1	63	211	2	0.00947867	0.031746	GO:0099601	GO:BP	regulation of neurotransmitter receptor activity	21100	22373	GO:0010469
query_1	FALSE	1	3	211	1	0.00473934	0.333333	GO:0150064	GO:BP	vertebrate eye-specific patterning	21100	23255	c("GO:0003002", "GO:0007417", "GO:0150063")
query_1	FALSE	1	17	211	1	0.00473934	0.0588235	GO:1900006	GO:BP	positive regulation of dendrite development	21100	23358	c("GO:0010976", "GO:0016358", "GO:0050773", "GO:0051094")
query_1	FALSE	1	394	211	3	0.014218	0.00761421	GO:0150063	GO:BP	visual system development	21100	23254	GO:0048880
query_1	FALSE	1	164	211	3	0.014218	0.0182927	GO:0099173	GO:BP	postsynapse organization	21100	22297	c("GO:0016043", "GO:0050808")
query_1	FALSE	1	24	211	2	0.00947867	0.0833333	GO:1900016	GO:BP	negative regulation of cytokine production involved in inflammatory response	21100	23368	c("GO:0001818", "GO:0002534", "GO:1900015")
query_1	FALSE	1	20	211	1	0.00473934	0.05	GO:1900118	GO:BP	negative regulation of execution phase of apoptosis	21100	23466	c("GO:0043066", "GO:0097194", "GO:1900117")
query_1	FALSE	1	95	211	2	0.00947867	0.0210526	GO:0098869	GO:BP	cellular oxidant detoxification	21100	22133	GO:1990748
query_1	FALSE	1	28	211	1	0.00473934	0.0357143	GO:1900117	GO:BP	regulation of execution phase of apoptosis	21100	23465	c("GO:0050794", "GO:0097194")
query_1	FALSE	1	34	211	1	0.00473934	0.0294118	GO:1900077	GO:BP	negative regulation of cellular response to insulin stimulus	21100	23425	c("GO:0032869", "GO:0048523", "GO:0048585", "GO:1900076")
query_1	FALSE	1	61	211	1	0.00473934	0.0163934	GO:1900076	GO:BP	regulation of cellular response to insulin stimulus	21100	23424	c("GO:0032869", "GO:0048583", "GO:0050794")
query_1	FALSE	1	24	211	1	0.00473934	0.0416667	GO:1900048	GO:BP	positive regulation of hemostasis	21100	23396	c("GO:0007599", "GO:0048518", "GO:1900046")
query_1	FALSE	1	709	211	9	0.042654	0.0126939	GO:0098916	GO:BP	anterograde trans-synaptic signaling	21100	22162	GO:0099537
query_1	FALSE	1	49	211	1	0.00473934	0.0204082	GO:1900047	GO:BP	negative regulation of hemostasis	21100	23395	c("GO:0007599", "GO:0048519", "GO:1900046")
query_1	FALSE	1	69	211	2	0.00947867	0.0289855	GO:1900046	GO:BP	regulation of hemostasis	21100	23394	c("GO:0007599", "GO:0050789", "GO:0050878")
query_1	FALSE	1	13	211	1	0.00473934	0.0769231	GO:1900025	GO:BP	negative regulation of substrate adhesion-dependent cell spreading	21100	23376	c("GO:0010771", "GO:0010812", "GO:0034446", "GO:1900024")
query_1	FALSE	1	59	211	1	0.00473934	0.0169492	GO:1900024	GO:BP	regulation of substrate adhesion-dependent cell spreading	21100	23375	c("GO:0010769", "GO:0010810", "GO:0034446")
query_1	FALSE	1	24	211	2	0.00947867	0.0833333	GO:1900017	GO:BP	positive regulation of cytokine production involved in inflammatory response	21100	23369	c("GO:0001819", "GO:0002534", "GO:1900015")
query_1	FALSE	1	62	211	1	0.00473934	0.016129	GO:0090311	GO:BP	regulation of protein deacetylation	21100	21322	c("GO:0006476", "GO:0031399")
query_1	FALSE	1	43	211	3	0.014218	0.0697674	GO:0098927	GO:BP	vesicle-mediated transport between endosomal compartments	21100	22170	GO:0016192
query_1	FALSE	1	206	211	3	0.014218	0.0145631	GO:0099003	GO:BP	vesicle-mediated transport in synapse	21100	22212	GO:0016192
query_1	FALSE	1	135	211	5	0.0236967	0.037037	GO:0099024	GO:BP	plasma membrane invagination	21100	22226	GO:0010324
query_1	FALSE	1	12	211	1	0.00473934	0.0833333	GO:0099171	GO:BP	presynaptic modulation of chemical synaptic transmission	21100	22295	GO:0050804
query_1	FALSE	1	56	211	4	0.0189573	0.0714286	GO:1900015	GO:BP	regulation of cytokine production involved in inflammatory response	21100	23367	c("GO:0001817", "GO:0002534")
query_1	FALSE	1	284	211	1	0.00473934	0.00352113	GO:0098813	GO:BP	nuclear chromosome segregation	21100	22109	c("GO:0007059", "GO:0022402")
query_1	FALSE	1	4	211	1	0.00473934	0.25	GO:0150062	GO:BP	complement-mediated synapse pruning	21100	23253	GO:0098883
query_1	FALSE	1	23	211	3	0.014218	0.130435	GO:0140632	GO:BP	inflammasome complex assembly	21100	23168	GO:0065003
query_1	FALSE	1	179	211	3	0.014218	0.0167598	GO:0110148	GO:BP	biomineralization	21100	22747	GO:0008150
query_1	FALSE	1	101	211	2	0.00947867	0.019802	GO:0110149	GO:BP	regulation of biomineralization	21100	22748	c("GO:0050789", "GO:0110148")
query_1	FALSE	1	188	211	1	0.00473934	0.00531915	GO:0140013	GO:BP	meiotic nuclear division	21100	22947	c("GO:0000280", "GO:1903046")
query_1	FALSE	1	29	211	2	0.00947867	0.0689655	GO:0110150	GO:BP	negative regulation of biomineralization	21100	22749	c("GO:0048519", "GO:0110148", "GO:0110149")
query_1	FALSE	1	18	211	1	0.00473934	0.0555556	GO:0110154	GO:BP	RNA decapping	21100	22751	GO:0016070
query_1	FALSE	1	15	211	1	0.00473934	0.0666667	GO:0110156	GO:BP	methylguanosine-cap decapping	21100	22753	GO:0110154
query_1	FALSE	1	553	211	5	0.0236967	0.00904159	GO:0120031	GO:BP	plasma membrane bounded cell projection assembly	21100	22772	c("GO:0030031", "GO:0120036")
query_1	FALSE	1	47	211	1	0.00473934	0.0212766	GO:0120163	GO:BP	negative regulation of cold-induced thermogenesis	21100	22843	c("GO:0009892", "GO:0051241", "GO:0106106", "GO:0120161")
query_1	FALSE	1	98	211	3	0.014218	0.0306122	GO:0120162	GO:BP	positive regulation of cold-induced thermogenesis	21100	22842	c("GO:0009893", "GO:0051240", "GO:0106106", "GO:0120161")
query_1	FALSE	1	147	211	4	0.0189573	0.0272109	GO:0120161	GO:BP	regulation of cold-induced thermogenesis	21100	22841	c("GO:0019222", "GO:0051239", "GO:0065008", "GO:0106106")
query_1	FALSE	1	1	211	1	0.00473934	1	GO:0120117	GO:BP	T cell meandering migration	21100	22823	GO:0072678
query_1	FALSE	1	5	211	1	0.00473934	0.2	GO:0120041	GO:BP	positive regulation of macrophage proliferation	21100	22780	c("GO:0061517", "GO:0070665", "GO:0120040")
query_1	FALSE	1	194	211	3	0.014218	0.0154639	GO:0120032	GO:BP	regulation of plasma membrane bounded cell projection assembly	21100	22773	c("GO:0060491", "GO:0120031", "GO:0120035")
query_1	FALSE	1	6	211	1	0.00473934	0.166667	GO:0120040	GO:BP	regulation of macrophage proliferation	21100	22779	c("GO:0061517", "GO:0070663")
query_1	FALSE	1	107	211	2	0.00947867	0.0186916	GO:0120034	GO:BP	positive regulation of plasma membrane bounded cell projection assembly	21100	22775	c("GO:0031346", "GO:0044089", "GO:0120031", "GO:0120032")
query_1	FALSE	1	638	211	7	0.0331754	0.0109718	GO:0120039	GO:BP	plasma membrane bounded cell projection morphogenesis	21100	22778	GO:0048858
query_1	FALSE	1	1485	211	17	0.0805687	0.0114478	GO:0120036	GO:BP	plasma membrane bounded cell projection organization	21100	22777	GO:0030030
query_1	FALSE	1	301	211	1	0.00473934	0.00332226	GO:0140014	GO:BP	mitotic nuclear division	21100	22948	c("GO:0000280", "GO:1903047")
query_1	FALSE	1	379	211	3	0.014218	0.00791557	GO:0140694	GO:BP	non-membrane-bounded organelle assembly	21100	23191	GO:0070925
query_1	FALSE	1	74	211	3	0.014218	0.0405405	GO:0140029	GO:BP	exocytic process	21100	22957	c("GO:0006887", "GO:0009987")
query_1	FALSE	1	2	211	1	0.00473934	0.5	GO:0140105	GO:BP	interleukin-10-mediated signaling pathway	21100	22981	GO:0019221
query_1	FALSE	1	150	211	2	0.00947867	0.0133333	GO:0099643	GO:BP	signal release from synapse	21100	22399	c("GO:0023061", "GO:0099536")
query_1	FALSE	1	21	211	1	0.00473934	0.047619	GO:0101023	GO:BP	vascular endothelial cell proliferation	21100	22477	GO:0001935
query_1	FALSE	1	36	211	1	0.00473934	0.0277778	GO:0140448	GO:BP	signaling receptor ligand precursor processing	21100	23102	GO:0016485
query_1	FALSE	1	19	211	1	0.00473934	0.0526316	GO:0140374	GO:BP	antiviral innate immune response	21100	23078	c("GO:0045087", "GO:0051607")
query_1	FALSE	1	845	211	19	0.0900474	0.0224852	GO:0140352	GO:BP	export from cell	21100	23070	c("GO:0006810", "GO:0009987")
query_1	FALSE	1	59	211	4	0.0189573	0.0677966	GO:0140253	GO:BP	cell-cell fusion	21100	23042	GO:0009987
query_1	FALSE	1	328	211	4	0.0189573	0.0121951	GO:0104004	GO:BP	cellular response to environmental stimulus	21100	22485	GO:0051716
query_1	FALSE	1	62	211	1	0.00473934	0.016129	GO:0140238	GO:BP	presynaptic endocytosis	21100	23029	c("GO:0006897", "GO:0051649", "GO:0099003")
query_1	FALSE	1	5	211	1	0.00473934	0.2	GO:0140206	GO:BP	dipeptide import across plasma membrane	21100	23013	c("GO:0035442", "GO:0140205")
query_1	FALSE	1	5	211	1	0.00473934	0.2	GO:0140205	GO:BP	oligopeptide import across plasma membrane	21100	23012	c("GO:0035672", "GO:0098657", "GO:0098739")
query_1	FALSE	1	88	211	2	0.00947867	0.0227273	GO:0106027	GO:BP	neuron projection organization	21100	22502	GO:0120036
query_1	FALSE	1	35	211	1	0.00473934	0.0285714	GO:0106056	GO:BP	regulation of calcineurin-mediated signaling	21100	22519	c("GO:0050848", "GO:0097720")
query_1	FALSE	1	21	211	2	0.00947867	0.0952381	GO:0140131	GO:BP	positive regulation of lymphocyte chemotaxis	21100	22992	c("GO:0002690", "GO:0048247", "GO:1901623", "GO:2000403")
query_1	FALSE	1	147	211	4	0.0189573	0.0272109	GO:0106106	GO:BP	cold-induced thermogenesis	21100	22542	c("GO:0001659", "GO:1990845")
query_1	FALSE	1	98	211	1	0.00473934	0.0102041	GO:0110020	GO:BP	regulation of actomyosin structure organization	21100	22646	c("GO:0031032", "GO:0032956")
query_1	FALSE	1	269	211	6	0.028436	0.0223048	GO:0110053	GO:BP	regulation of actin filament organization	21100	22673	c("GO:0007015", "GO:0032956", "GO:1902903")
query_1	FALSE	1	23	211	1	0.00473934	0.0434783	GO:0140112	GO:BP	extracellular vesicle biogenesis	21100	22982	GO:0044085
query_1	FALSE	1	77	211	2	0.00947867	0.025974	GO:0140056	GO:BP	organelle localization by membrane tethering	21100	22969	c("GO:0022406", "GO:0051640")
query_1	FALSE	1	34	211	1	0.00473934	0.0294118	GO:0098801	GO:BP	regulation of renal system process	21100	22105	c("GO:0003014", "GO:0044057")
query_1	FALSE	1	9	211	1	0.00473934	0.111111	GO:1900119	GO:BP	positive regulation of execution phase of apoptosis	21100	23467	c("GO:0043065", "GO:0097194", "GO:1900117")
query_1	FALSE	1	14	211	1	0.00473934	0.0714286	GO:0098761	GO:BP	cellular response to interleukin-7	21100	22080	c("GO:0071345", "GO:0098760")
query_1	FALSE	1	208	211	6	0.028436	0.0288462	GO:1901215	GO:BP	negative regulation of neuron death	21100	24534	c("GO:0060548", "GO:0070997", "GO:1901214")
query_1	FALSE	1	37	211	3	0.014218	0.0810811	GO:1901186	GO:BP	positive regulation of ERBB signaling pathway	21100	24505	c("GO:0009967", "GO:0038127", "GO:1901184")
query_1	FALSE	1	35	211	2	0.00947867	0.0571429	GO:1901185	GO:BP	negative regulation of ERBB signaling pathway	21100	24504	c("GO:0009968", "GO:0038127", "GO:1901184")
query_1	FALSE	1	76	211	4	0.0189573	0.0526316	GO:1901184	GO:BP	regulation of ERBB signaling pathway	21100	24503	c("GO:0009966", "GO:0038127")
query_1	FALSE	1	612	211	3	0.014218	0.00490196	GO:1901137	GO:BP	carbohydrate derivative biosynthetic process	21100	24459	c("GO:1901135", "GO:1901576")
query_1	FALSE	1	12	211	2	0.00947867	0.166667	GO:0097531	GO:BP	mast cell migration	21100	21872	GO:0097529
query_1	FALSE	1	172	211	4	0.0189573	0.0232558	GO:1901136	GO:BP	carbohydrate derivative catabolic process	21100	24458	c("GO:1901135", "GO:1901575")
query_1	FALSE	1	1031	211	12	0.056872	0.0116392	GO:1901135	GO:BP	carbohydrate derivative metabolic process	21100	24457	GO:0071704
query_1	FALSE	1	32	211	1	0.00473934	0.03125	GO:1901031	GO:BP	regulation of response to reactive oxygen species	21100	24356	c("GO:0000302", "GO:1902882")
query_1	FALSE	1	17	211	1	0.00473934	0.0588235	GO:1901030	GO:BP	positive regulation of mitochondrial outer membrane permeabilization involved in apoptotic signaling pathway	21100	24355	c("GO:0010822", "GO:0035794", "GO:0051050", "GO:0097345", "GO:1901028")
query_1	FALSE	1	28	211	1	0.00473934	0.0357143	GO:1901028	GO:BP	regulation of mitochondrial outer membrane permeabilization involved in apoptotic signaling pathway	21100	24353	c("GO:0010821", "GO:0046902", "GO:0051049", "GO:0097345")
query_1	FALSE	1	37	211	1	0.00473934	0.027027	GO:1901021	GO:BP	positive regulation of calcium ion transmembrane transporter activity	21100	24346	c("GO:0032414", "GO:1901019", "GO:1904427")
query_1	FALSE	1	85	211	1	0.00473934	0.0117647	GO:1901019	GO:BP	regulation of calcium ion transmembrane transporter activity	21100	24344	c("GO:0032412", "GO:1903169")
query_1	FALSE	1	29	211	1	0.00473934	0.0344828	GO:1900745	GO:BP	positive regulation of p38MAPK cascade	21100	24076	c("GO:0032874", "GO:0038066", "GO:1900744")
query_1	FALSE	1	42	211	1	0.00473934	0.0238095	GO:1900744	GO:BP	regulation of p38MAPK cascade	21100	24075	c("GO:0032872", "GO:0038066")
query_1	FALSE	1	2	211	1	0.00473934	0.5	GO:0097534	GO:BP	lymphoid lineage cell migration	21100	21875	GO:0016477
query_1	FALSE	1	9	211	1	0.00473934	0.111111	GO:1900740	GO:BP	positive regulation of protein insertion into mitochondrial membrane involved in apoptotic signaling pathway	21100	24071	c("GO:0001844", "GO:0090316", "GO:1900739", "GO:1901030", "GO:1903749", "GO:1905477")
query_1	FALSE	1	86	211	4	0.0189573	0.0465116	GO:1901216	GO:BP	positive regulation of neuron death	21100	24535	c("GO:0010942", "GO:0070997", "GO:1901214")
query_1	FALSE	1	9	211	1	0.00473934	0.111111	GO:1900739	GO:BP	regulation of protein insertion into mitochondrial membrane involved in apoptotic signaling pathway	21100	24070	c("GO:0001844", "GO:0010821", "GO:0033157", "GO:1903747", "GO:1905475")
query_1	FALSE	1	100	211	2	0.00947867	0.02	GO:1901222	GO:BP	regulation of NIK/NF-kappaB signaling	21100	24541	c("GO:0038061", "GO:1902531")
query_1	FALSE	1	2	211	1	0.00473934	0.5	GO:0097528	GO:BP	execution phase of necroptosis	21100	21869	c("GO:0009987", "GO:0070266")
query_1	FALSE	1	7	211	1	0.00473934	0.142857	GO:1901341	GO:BP	positive regulation of store-operated calcium channel activity	21100	24647	c("GO:1901021", "GO:1901339", "GO:2001259")
query_1	FALSE	1	19	211	1	0.00473934	0.0526316	GO:0097202	GO:BP	activation of cysteine-type endopeptidase activity	21100	21702	c("GO:0031638", "GO:2001056")
query_1	FALSE	1	30	211	1	0.00473934	0.0333333	GO:0097205	GO:BP	renal filtration	21100	21703	GO:0003014
query_1	FALSE	1	9	211	1	0.00473934	0.111111	GO:1901339	GO:BP	regulation of store-operated calcium channel activity	21100	24645	c("GO:1901019", "GO:2001257")
query_1	FALSE	1	256	211	2	0.00947867	0.0078125	GO:1901293	GO:BP	nucleoside phosphate biosynthetic process	21100	24602	c("GO:0006753", "GO:0034654", "GO:0090407")
query_1	FALSE	1	118	211	3	0.014218	0.0254237	GO:0097237	GO:BP	cellular response to toxic substance	21100	21717	c("GO:0009636", "GO:0070887")
query_1	FALSE	1	37	211	3	0.014218	0.0810811	GO:0097242	GO:BP	amyloid-beta clearance	21100	21722	GO:0032501
query_1	FALSE	1	9	211	1	0.00473934	0.111111	GO:0097264	GO:BP	self proteolysis	21100	21728	GO:0006508
query_1	FALSE	1	84	211	1	0.00473934	0.0119048	GO:1901292	GO:BP	nucleoside phosphate catabolic process	21100	24601	c("GO:0006753", "GO:0034655", "GO:0046434")
query_1	FALSE	1	82	211	1	0.00473934	0.0121951	GO:1901264	GO:BP	carbohydrate derivative transport	21100	24574	GO:0071702
query_1	FALSE	1	237	211	6	0.028436	0.0253165	GO:0097305	GO:BP	response to alcohol	21100	21763	c("GO:0010033", "GO:1901700")
query_1	FALSE	1	92	211	3	0.014218	0.0326087	GO:0097306	GO:BP	cellular response to alcohol	21100	21764	c("GO:0071310", "GO:0097305", "GO:1901701")
query_1	FALSE	1	39	211	1	0.00473934	0.025641	GO:0097345	GO:BP	mitochondrial outer membrane permeabilization	21100	21796	c("GO:0097190", "GO:1902110")
query_1	FALSE	1	55	211	1	0.00473934	0.0181818	GO:0097352	GO:BP	autophagosome maturation	21100	21798	c("GO:0016236", "GO:0032984")
query_1	FALSE	1	778	211	11	0.0521327	0.0141388	GO:0097435	GO:BP	supramolecular fiber organization	21100	21838	GO:0016043
query_1	FALSE	1	238	211	3	0.014218	0.012605	GO:0097485	GO:BP	neuron projection guidance	21100	21854	c("GO:0006928", "GO:0006935", "GO:0048812")
query_1	FALSE	1	8	211	2	0.00947867	0.25	GO:0097527	GO:BP	necroptotic signaling pathway	21100	21868	c("GO:0007165", "GO:0070266")
query_1	FALSE	1	66	211	2	0.00947867	0.030303	GO:1901224	GO:BP	positive regulation of NIK/NF-kappaB signaling	21100	24543	c("GO:0038061", "GO:1901222", "GO:1902533")
query_1	FALSE	1	2	211	1	0.00473934	0.5	GO:0097535	GO:BP	lymphoid lineage cell migration into thymus	21100	21876	GO:0097534
query_1	FALSE	1	42	211	1	0.00473934	0.0238095	GO:1900544	GO:BP	positive regulation of purine nucleotide metabolic process	21100	23875	c("GO:0006163", "GO:0045981", "GO:1900542")
query_1	FALSE	1	82	211	2	0.00947867	0.0243902	GO:1900542	GO:BP	regulation of purine nucleotide metabolic process	21100	23873	c("GO:0006140", "GO:0006163")
query_1	FALSE	1	792	211	18	0.0853081	0.0227273	GO:0098662	GO:BP	inorganic cation transmembrane transport	21100	22015	c("GO:0098655", "GO:0098660")
query_1	FALSE	1	22	211	1	0.00473934	0.0454545	GO:0098703	GO:BP	calcium ion import across plasma membrane	21100	22033	c("GO:0097553", "GO:0098659")
query_1	FALSE	1	20	211	2	0.00947867	0.1	GO:1900225	GO:BP	regulation of NLRP3 inflammasome complex assembly	21100	23569	c("GO:0043254", "GO:0044546")
query_1	FALSE	1	9	211	1	0.00473934	0.111111	GO:1900222	GO:BP	negative regulation of amyloid-beta clearance	21100	23566	c("GO:0051241", "GO:0097242", "GO:1900221")
query_1	FALSE	1	5	211	1	0.00473934	0.2	GO:0098711	GO:BP	iron ion import across plasma membrane	21100	22040	c("GO:0033212", "GO:0034755", "GO:0098659")
query_1	FALSE	1	18	211	1	0.00473934	0.0555556	GO:1900221	GO:BP	regulation of amyloid-beta clearance	21100	23565	c("GO:0051239", "GO:0097242")
query_1	FALSE	1	137	211	1	0.00473934	0.00729927	GO:0098732	GO:BP	macromolecule deacylation	21100	22060	GO:0043412
query_1	FALSE	1	2	211	1	0.00473934	0.5	GO:1900220	GO:BP	semaphorin-plexin signaling pathway involved in bone trabecula morphogenesis	21100	23564	c("GO:0061430", "GO:0071526")
query_1	FALSE	1	174	211	3	0.014218	0.0172414	GO:0098739	GO:BP	import across plasma membrane	21100	22065	GO:0055085
query_1	FALSE	1	277	211	4	0.0189573	0.0144404	GO:0098742	GO:BP	cell-cell adhesion via plasma-membrane adhesion molecules	21100	22067	GO:0098609
query_1	FALSE	1	135	211	3	0.014218	0.0222222	GO:0098754	GO:BP	detoxification	21100	22073	c("GO:0008150", "GO:0009636")
query_1	FALSE	1	1	211	1	0.00473934	1	GO:0098756	GO:BP	response to interleukin-21	21100	22075	GO:0034097
query_1	FALSE	1	1	211	1	0.00473934	1	GO:0098757	GO:BP	cellular response to interleukin-21	21100	22076	GO:0098756
query_1	FALSE	1	87	211	3	0.014218	0.0344828	GO:1900182	GO:BP	positive regulation of protein localization to nucleus	21100	23526	c("GO:0034504", "GO:0048522", "GO:1900180", "GO:1903829")
query_1	FALSE	1	35	211	1	0.00473934	0.0285714	GO:1900181	GO:BP	negative regulation of protein localization to nucleus	21100	23525	c("GO:0034504", "GO:0048523", "GO:1900180", "GO:1903828")
query_1	FALSE	1	137	211	4	0.0189573	0.0291971	GO:1900180	GO:BP	regulation of protein localization to nucleus	21100	23524	c("GO:0032880", "GO:0034504", "GO:0060341")
query_1	FALSE	1	14	211	1	0.00473934	0.0714286	GO:0098760	GO:BP	response to interleukin-7	21100	22079	GO:0034097
query_1	FALSE	1	858	211	18	0.0853081	0.020979	GO:0098660	GO:BP	inorganic ion transmembrane transport	21100	22013	GO:0034220
query_1	FALSE	1	103	211	2	0.00947867	0.0194175	GO:0098659	GO:BP	inorganic cation import across plasma membrane	21100	22012	c("GO:0098662", "GO:0099587")
query_1	FALSE	1	225	211	4	0.0189573	0.0177778	GO:0098657	GO:BP	import into cell	21100	22010	GO:0006810
query_1	FALSE	1	903	211	19	0.0900474	0.021041	GO:0098655	GO:BP	cation transmembrane transport	21100	22008	c("GO:0006812", "GO:0034220")
query_1	FALSE	1	13	211	2	0.00947867	0.153846	GO:1900426	GO:BP	positive regulation of defense response to bacterium	21100	23761	c("GO:0002833", "GO:0031349", "GO:0032103", "GO:0042742", "GO:1900424")
query_1	FALSE	1	19	211	2	0.00947867	0.105263	GO:1900424	GO:BP	regulation of defense response to bacterium	21100	23759	c("GO:0002831", "GO:0031347", "GO:0032101", "GO:0042742")
query_1	FALSE	1	81	211	2	0.00947867	0.0246914	GO:1900407	GO:BP	regulation of cellular response to oxidative stress	21100	23742	c("GO:0034599", "GO:0080135", "GO:1902882")
query_1	FALSE	1	91	211	3	0.014218	0.032967	GO:0097581	GO:BP	lamellipodium organization	21100	21888	GO:0120036
query_1	FALSE	1	3580	211	44	0.208531	0.0122905	GO:0097659	GO:BP	nucleic acid-templated transcription	21100	21907	c("GO:0010467", "GO:0032774")
query_1	FALSE	1	23	211	1	0.00473934	0.0434783	GO:1900370	GO:BP	positive regulation of post-transcriptional gene silencing by RNA	21100	23708	c("GO:0035194", "GO:0060148", "GO:1900368")
query_1	FALSE	1	41	211	1	0.00473934	0.0243902	GO:1900368	GO:BP	regulation of post-transcriptional gene silencing by RNA	21100	23706	c("GO:0035194", "GO:0060147", "GO:0060966")
query_1	FALSE	1	46	211	2	0.00947867	0.0434783	GO:0097720	GO:BP	calcineurin-mediated signaling	21100	21934	GO:0019722
query_1	FALSE	1	287	211	9	0.042654	0.0313589	GO:1901342	GO:BP	regulation of vasculature development	21100	24648	c("GO:0001944", "GO:2000026")
query_1	FALSE	1	21	211	1	0.00473934	0.047619	GO:0097734	GO:BP	extracellular exosome biogenesis	21100	21938	GO:0140112
query_1	FALSE	1	46	211	2	0.00947867	0.0434783	GO:0098534	GO:BP	centriole assembly	21100	21988	c("GO:0031023", "GO:0140694")
query_1	FALSE	1	42	211	3	0.014218	0.0714286	GO:1900274	GO:BP	regulation of phospholipase C activity	21100	23612	GO:0010517
query_1	FALSE	1	23	211	1	0.00473934	0.0434783	GO:1900273	GO:BP	positive regulation of long-term synaptic potentiation	21100	23611	c("GO:0050806", "GO:0060291", "GO:1900271")
query_1	FALSE	1	45	211	1	0.00473934	0.0222222	GO:1900271	GO:BP	regulation of long-term synaptic potentiation	21100	23609	c("GO:0048167", "GO:0060291")
query_1	FALSE	1	6	211	1	0.00473934	0.166667	GO:1900244	GO:BP	positive regulation of synaptic vesicle endocytosis	21100	23588	c("GO:0045807", "GO:0048488", "GO:1900242", "GO:1903423")
query_1	FALSE	1	13	211	1	0.00473934	0.0769231	GO:1900242	GO:BP	regulation of synaptic vesicle endocytosis	21100	23586	c("GO:0030100", "GO:0048488", "GO:1903421")
query_1	FALSE	1	78	211	4	0.0189573	0.0512821	GO:0098586	GO:BP	cellular response to virus	21100	21997	GO:0009615
query_1	FALSE	1	12	211	2	0.00947867	0.166667	GO:1900227	GO:BP	positive regulation of NLRP3 inflammasome complex assembly	21100	23571	c("GO:0031334", "GO:0044546", "GO:1900225")
query_1	FALSE	1	139	211	3	0.014218	0.0215827	GO:0097746	GO:BP	blood vessel diameter maintenance	21100	21947	c("GO:0003018", "GO:0008015", "GO:0035296")
query_1	FALSE	1	1527	211	6	0.028436	0.00392927	GO:0000003	GO:BP	reproduction	21100	3	GO:0008150
query_1	FALSE	1	18	211	1	0.00473934	0.0555556	GO:0071404	GO:BP	cellular response to low-density lipoprotein particle stimulus	21100	19433	c("GO:0055094", "GO:0071402")
query_1	FALSE	1	7540	211	56	0.265403	0.00742706	GO:0090304	GO:BP	nucleic acid metabolic process	21100	21315	c("GO:0006139", "GO:0043170")
query_1	FALSE	1	50	211	2	0.00947867	0.04	GO:0060425	GO:BP	lung morphogenesis	21100	17191	c("GO:0009887", "GO:0030324")
query_1	FALSE	1	36	211	1	0.00473934	0.0277778	GO:0060428	GO:BP	lung epithelium development	21100	17194	c("GO:0030324", "GO:0060429")
query_1	FALSE	1	1180	211	11	0.0521327	0.00932203	GO:0060429	GO:BP	epithelium development	21100	17195	GO:0009888
query_1	FALSE	1	18	211	2	0.00947867	0.111111	GO:0060438	GO:BP	trachea development	21100	17204	c("GO:0048513", "GO:0060541")
query_1	FALSE	1	10	211	2	0.00947867	0.2	GO:0060439	GO:BP	trachea morphogenesis	21100	17205	c("GO:0009887", "GO:0060438")
query_1	FALSE	1	6	211	2	0.00947867	0.333333	GO:0060440	GO:BP	trachea formation	21100	17206	c("GO:0048645", "GO:0060439")
query_1	FALSE	1	17	211	1	0.00473934	0.0588235	GO:0060457	GO:BP	negative regulation of digestive system process	21100	17223	c("GO:0022600", "GO:0044058", "GO:0051241")
query_1	FALSE	1	294	211	2	0.00947867	0.00680272	GO:0060485	GO:BP	mesenchyme development	21100	17250	c("GO:0009888", "GO:0048513")
query_1	FALSE	1	196	211	3	0.014218	0.0153061	GO:0060491	GO:BP	regulation of cell projection assembly	21100	17256	c("GO:0030031", "GO:0031344", "GO:0044087")
query_1	FALSE	1	9	211	1	0.00473934	0.111111	GO:0060502	GO:BP	epithelial cell proliferation involved in lung morphogenesis	21100	17267	c("GO:0050673", "GO:0060425", "GO:0060428")
query_1	FALSE	1	394	211	1	0.00473934	0.00253807	GO:0060537	GO:BP	muscle tissue development	21100	17302	GO:0009888
query_1	FALSE	1	205	211	3	0.014218	0.0146341	GO:0060541	GO:BP	respiratory system development	21100	17306	GO:0048731
query_1	FALSE	1	1	211	1	0.00473934	1	GO:0060549	GO:BP	regulation of fructose 1,6-bisphosphate 1-phosphatase activity	21100	17314	GO:0032113
query_1	FALSE	1	1	211	1	0.00473934	1	GO:0060550	GO:BP	positive regulation of fructose 1,6-bisphosphate 1-phosphatase activity	21100	17315	c("GO:0010922", "GO:0060549")
query_1	FALSE	1	1	211	1	0.00473934	1	GO:0060551	GO:BP	regulation of fructose 1,6-bisphosphate metabolic process	21100	17316	c("GO:0019220", "GO:0030388")
query_1	FALSE	1	1	211	1	0.00473934	1	GO:0060552	GO:BP	positive regulation of fructose 1,6-bisphosphate metabolic process	21100	17317	c("GO:0030388", "GO:0045937", "GO:0060551")
query_1	FALSE	1	7	211	1	0.00473934	0.142857	GO:0060556	GO:BP	regulation of vitamin D biosynthetic process	21100	17318	c("GO:0030656", "GO:0031326", "GO:0042368", "GO:0050810")
query_1	FALSE	1	2	211	1	0.00473934	0.5	GO:0060557	GO:BP	positive regulation of vitamin D biosynthetic process	21100	17319	c("GO:0010893", "GO:0031328", "GO:0042368", "GO:0046136", "GO:0060556")
query_1	FALSE	1	7	211	1	0.00473934	0.142857	GO:0060558	GO:BP	regulation of calcidiol 1-monooxygenase activity	21100	17320	GO:0032768
query_1	FALSE	1	3	211	1	0.00473934	0.333333	GO:0060559	GO:BP	positive regulation of calcidiol 1-monooxygenase activity	21100	17321	c("GO:0032770", "GO:0060558")
query_1	FALSE	1	237	211	2	0.00947867	0.00843882	GO:0060560	GO:BP	developmental growth involved in morphogenesis	21100	17322	c("GO:0009653", "GO:0048589")
query_1	FALSE	1	27	211	1	0.00473934	0.037037	GO:0060561	GO:BP	apoptotic process involved in morphogenesis	21100	17323	c("GO:0009653", "GO:1902742")
query_1	FALSE	1	331	211	2	0.00947867	0.0060423	GO:0060562	GO:BP	epithelial tube morphogenesis	21100	17324	c("GO:0002009", "GO:0035239")
query_1	FALSE	1	31	211	2	0.00947867	0.0645161	GO:0060674	GO:BP	placenta blood vessel development	21100	17432	c("GO:0001568", "GO:0001890", "GO:0003006")
query_1	FALSE	1	47	211	2	0.00947867	0.0425532	GO:0060711	GO:BP	labyrinthine layer development	21100	17467	c("GO:0001892", "GO:0048608")
query_1	FALSE	1	20	211	1	0.00473934	0.05	GO:0060716	GO:BP	labyrinthine layer blood vessel development	21100	17472	c("GO:0048568", "GO:0048608", "GO:0060674", "GO:0060711")
query_1	FALSE	1	8	211	1	0.00473934	0.125	GO:0060753	GO:BP	regulation of mast cell chemotaxis	21100	17507	c("GO:0002551", "GO:0002688")
query_1	FALSE	1	32	211	1	0.00473934	0.03125	GO:0060421	GO:BP	positive regulation of heart growth	21100	17188	c("GO:0046622", "GO:0060419", "GO:0060420")
query_1	FALSE	1	60	211	1	0.00473934	0.0166667	GO:0060420	GO:BP	regulation of heart growth	21100	17187	c("GO:0046620", "GO:0060419", "GO:2000026")
query_1	FALSE	1	78	211	1	0.00473934	0.0128205	GO:0060419	GO:BP	heart growth	21100	17186	c("GO:0007507", "GO:0035265")
query_1	FALSE	1	37	211	1	0.00473934	0.027027	GO:0060416	GO:BP	response to growth hormone	21100	17185	GO:0043434
query_1	FALSE	1	52	211	2	0.00947867	0.0384615	GO:0060218	GO:BP	hematopoietic stem cell differentiation	21100	17002	c("GO:0002244", "GO:0048863")
query_1	FALSE	1	40	211	1	0.00473934	0.025	GO:0060236	GO:BP	regulation of mitotic spindle organization	21100	17017	c("GO:0007052", "GO:0090224")
query_1	FALSE	1	322	211	6	0.028436	0.0186335	GO:0060249	GO:BP	anatomical structure homeostasis	21100	17026	GO:0042592
query_1	FALSE	1	25	211	2	0.00947867	0.08	GO:0060251	GO:BP	regulation of glial cell proliferation	21100	17028	c("GO:0014009", "GO:0042127")
query_1	FALSE	1	13	211	2	0.00947867	0.153846	GO:0060252	GO:BP	positive regulation of glial cell proliferation	21100	17029	c("GO:0008284", "GO:0014009", "GO:0014015", "GO:0060251")
query_1	FALSE	1	27	211	1	0.00473934	0.037037	GO:0060259	GO:BP	regulation of feeding behavior	21100	17036	c("GO:0007631", "GO:0050795")
query_1	FALSE	1	18	211	2	0.00947867	0.111111	GO:0060263	GO:BP	regulation of respiratory burst	21100	17040	c("GO:0019222", "GO:0045730")
query_1	FALSE	1	7	211	1	0.00473934	0.142857	GO:0060264	GO:BP	regulation of respiratory burst involved in inflammatory response	21100	17041	c("GO:0002536", "GO:0002697", "GO:0045088", "GO:0050727", "GO:0051239", "GO:0060263")
query_1	FALSE	1	356	211	1	0.00473934	0.00280899	GO:0060271	GO:BP	cilium assembly	21100	17048	c("GO:0044782", "GO:0070925", "GO:0120031")
query_1	FALSE	1	497	211	9	0.042654	0.0181087	GO:0060284	GO:BP	regulation of cell development	21100	17061	c("GO:0045595", "GO:0048468")
query_1	FALSE	1	104	211	2	0.00947867	0.0192308	GO:0060291	GO:BP	long-term synaptic potentiation	21100	17068	c("GO:0048167", "GO:0050806")
query_1	FALSE	1	31	211	1	0.00473934	0.0322581	GO:0060292	GO:BP	long-term synaptic depression	21100	17069	c("GO:0048167", "GO:0050805")
query_1	FALSE	1	1	211	1	0.00473934	1	GO:0060305	GO:BP	regulation of cell diameter	21100	17081	GO:0008361
query_1	FALSE	1	161	211	4	0.0189573	0.0248447	GO:0060759	GO:BP	regulation of response to cytokine stimulus	21100	17513	c("GO:0034097", "GO:0048583")
query_1	FALSE	1	809	211	5	0.0236967	0.00618047	GO:0060322	GO:BP	head development	21100	17097	GO:0048856
query_1	FALSE	1	16	211	1	0.00473934	0.0625	GO:0060330	GO:BP	regulation of response to interferon-gamma	21100	17105	c("GO:0034341", "GO:0045088", "GO:0060759")
query_1	FALSE	1	6	211	1	0.00473934	0.166667	GO:0060332	GO:BP	positive regulation of response to interferon-gamma	21100	17107	c("GO:0034341", "GO:0045089", "GO:0060330", "GO:0060760")
query_1	FALSE	1	16	211	1	0.00473934	0.0625	GO:0060334	GO:BP	regulation of interferon-gamma-mediated signaling pathway	21100	17109	c("GO:0001959", "GO:0060330", "GO:0060333")
query_1	FALSE	1	6	211	1	0.00473934	0.166667	GO:0060335	GO:BP	positive regulation of interferon-gamma-mediated signaling pathway	21100	17110	c("GO:0001961", "GO:0060332", "GO:0060333", "GO:0060334")
query_1	FALSE	1	62	211	3	0.014218	0.0483871	GO:0060337	GO:BP	type I interferon signaling pathway	21100	17112	c("GO:0019221", "GO:0071357")
query_1	FALSE	1	40	211	1	0.00473934	0.025	GO:0060338	GO:BP	regulation of type I interferon-mediated signaling pathway	21100	17113	c("GO:0001959", "GO:0045088", "GO:0060337")
query_1	FALSE	1	19	211	1	0.00473934	0.0526316	GO:0060339	GO:BP	negative regulation of type I interferon-mediated signaling pathway	21100	17114	c("GO:0001960", "GO:0045824", "GO:0060337", "GO:0060338")
query_1	FALSE	1	19	211	1	0.00473934	0.0526316	GO:0060340	GO:BP	positive regulation of type I interferon-mediated signaling pathway	21100	17115	c("GO:0001961", "GO:0045089", "GO:0060337", "GO:0060338")
query_1	FALSE	1	741	211	15	0.07109	0.0202429	GO:0060341	GO:BP	regulation of cellular localization	21100	17116	c("GO:0032879", "GO:0050794", "GO:0051641")
query_1	FALSE	1	231	211	2	0.00947867	0.00865801	GO:0060348	GO:BP	bone development	21100	17122	c("GO:0001501", "GO:0048513")
query_1	FALSE	1	6	211	1	0.00473934	0.166667	GO:0060374	GO:BP	mast cell differentiation	21100	17147	GO:0002573
query_1	FALSE	1	25	211	1	0.00473934	0.04	GO:0060396	GO:BP	growth hormone receptor signaling pathway	21100	17167	c("GO:0007169", "GO:0071378")
query_1	FALSE	1	8	211	1	0.00473934	0.125	GO:0060397	GO:BP	growth hormone receptor signaling pathway via JAK-STAT	21100	17168	GO:0060396
query_1	FALSE	1	50	211	2	0.00947867	0.04	GO:0060324	GO:BP	face development	21100	17099	c("GO:0048856", "GO:0060322")
query_1	FALSE	1	67	211	4	0.0189573	0.0597015	GO:0060193	GO:BP	positive regulation of lipase activity	21100	16985	c("GO:0051345", "GO:0060191")
query_1	FALSE	1	64	211	1	0.00473934	0.015625	GO:0060760	GO:BP	positive regulation of response to cytokine stimulus	21100	17514	c("GO:0034097", "GO:0048584", "GO:0060759")
query_1	FALSE	1	271	211	4	0.0189573	0.0147601	GO:0060828	GO:BP	regulation of canonical Wnt signaling pathway	21100	17582	c("GO:0030111", "GO:0060070")
query_1	FALSE	1	15	211	1	0.00473934	0.0666667	GO:0061308	GO:BP	cardiac neural crest cell development involved in heart development	21100	18036	c("GO:0014032", "GO:0061307")
query_1	FALSE	1	19	211	1	0.00473934	0.0526316	GO:0061323	GO:BP	cell proliferation involved in heart morphogenesis	21100	18051	c("GO:0003007", "GO:0008283")
query_1	FALSE	1	147	211	2	0.00947867	0.0136054	GO:0061351	GO:BP	neural precursor cell proliferation	21100	18079	GO:0008283
query_1	FALSE	1	47	211	1	0.00473934	0.0212766	GO:0061383	GO:BP	trabecula morphogenesis	21100	18111	GO:0009653
query_1	FALSE	1	111	211	2	0.00947867	0.018018	GO:0061387	GO:BP	regulation of extent of cell growth	21100	18115	c("GO:0001558", "GO:0008361")
query_1	FALSE	1	34	211	2	0.00947867	0.0588235	GO:0061418	GO:BP	regulation of transcription from RNA polymerase II promoter in response to hypoxia	21100	18146	c("GO:0043618", "GO:0071456")
query_1	FALSE	1	13	211	1	0.00473934	0.0769231	GO:0061430	GO:BP	bone trabecula morphogenesis	21100	18158	GO:0061383
query_1	FALSE	1	265	211	1	0.00473934	0.00377358	GO:0061448	GO:BP	connective tissue development	21100	18176	GO:0009888
query_1	FALSE	1	439	211	2	0.00947867	0.00455581	GO:0061458	GO:BP	reproductive system development	21100	18185	GO:0048731
query_1	FALSE	1	4	211	1	0.00473934	0.25	GO:0061502	GO:BP	early endosome to recycling endosome transport	21100	18203	c("GO:0016482", "GO:0098927")
query_1	FALSE	1	11	211	1	0.00473934	0.0909091	GO:0061517	GO:BP	macrophage proliferation	21100	18213	GO:0070661
query_1	FALSE	1	484	211	5	0.0236967	0.0103306	GO:0061564	GO:BP	axon development	21100	18256	GO:0031175
query_1	FALSE	1	161	211	2	0.00947867	0.0124224	GO:0061572	GO:BP	actin filament bundle organization	21100	18264	GO:0007015
query_1	FALSE	1	61	211	1	0.00473934	0.0163934	GO:0061614	GO:BP	miRNA transcription	21100	18285	GO:0006351
query_1	FALSE	1	14	211	1	0.00473934	0.0714286	GO:0061615	GO:BP	glycolytic process through fructose-6-phosphate	21100	18286	GO:0006096
query_1	FALSE	1	13	211	1	0.00473934	0.0769231	GO:0061620	GO:BP	glycolytic process through glucose-6-phosphate	21100	18289	GO:0061615
query_1	FALSE	1	11	211	1	0.00473934	0.0909091	GO:0061621	GO:BP	canonical glycolysis	21100	18290	c("GO:0006735", "GO:0061620", "GO:0061718")
query_1	FALSE	1	106	211	1	0.00473934	0.00943396	GO:0061640	GO:BP	cytoskeleton-dependent cytokinesis	21100	18299	GO:0000910
query_1	FALSE	1	11	211	1	0.00473934	0.0909091	GO:0061718	GO:BP	glucose catabolic process to pyruvate	21100	18332	c("GO:0006007", "GO:0006090")
query_1	FALSE	1	47	211	3	0.014218	0.0638298	GO:0061756	GO:BP	leukocyte adhesion to vascular endothelial cell	21100	18358	GO:0007159
query_1	FALSE	1	21	211	1	0.00473934	0.047619	GO:0061760	GO:BP	antifungal innate immune response	21100	18360	c("GO:0045087", "GO:0050832")
query_1	FALSE	1	82	211	4	0.0189573	0.0487805	GO:0061844	GO:BP	antimicrobial humoral immune response mediated by antimicrobial peptide	21100	18394	GO:0019730
query_1	FALSE	1	541	211	7	0.0331754	0.012939	GO:0061919	GO:BP	process utilizing autophagic mechanism	21100	18439	GO:0009987
query_1	FALSE	1	134	211	1	0.00473934	0.00746269	GO:0061982	GO:BP	meiosis I cell cycle process	21100	18486	GO:1903046
query_1	FALSE	1	347	211	5	0.0236967	0.0144092	GO:0062012	GO:BP	regulation of small molecule metabolic process	21100	18502	c("GO:0019222", "GO:0044281")
query_1	FALSE	1	139	211	1	0.00473934	0.00719424	GO:0062013	GO:BP	positive regulation of small molecule metabolic process	21100	18503	c("GO:0009893", "GO:0044281", "GO:0062012")
query_1	FALSE	1	94	211	1	0.00473934	0.0106383	GO:0062014	GO:BP	negative regulation of small molecule metabolic process	21100	18504	c("GO:0009892", "GO:0044281", "GO:0062012")
query_1	FALSE	1	15	211	1	0.00473934	0.0666667	GO:0061307	GO:BP	cardiac neural crest cell differentiation involved in heart development	21100	18035	c("GO:0014033", "GO:0035051")
query_1	FALSE	1	71	211	1	0.00473934	0.0140845	GO:0061180	GO:BP	mammary gland epithelium development	21100	17911	c("GO:0030879", "GO:0060429")
query_1	FALSE	1	90	211	1	0.00473934	0.0111111	GO:0061157	GO:BP	mRNA destabilization	21100	17896	c("GO:0017148", "GO:0043488", "GO:0050779", "GO:0061014")
query_1	FALSE	1	18	211	1	0.00473934	0.0555556	GO:0061154	GO:BP	endothelial tube morphogenesis	21100	17893	c("GO:0003159", "GO:0060562")
query_1	FALSE	1	12	211	1	0.00473934	0.0833333	GO:0060907	GO:BP	positive regulation of macrophage cytokine production	21100	17659	c("GO:0010934", "GO:0010935", "GO:0061081")
query_1	FALSE	1	32	211	1	0.00473934	0.03125	GO:0060914	GO:BP	heart formation	21100	17666	c("GO:0003007", "GO:0048645")
query_1	FALSE	1	39	211	1	0.00473934	0.025641	GO:0060964	GO:BP	regulation of miRNA-mediated gene silencing	21100	17715	c("GO:0035195", "GO:1900368")
query_1	FALSE	1	42	211	1	0.00473934	0.0238095	GO:0060966	GO:BP	regulation of gene silencing by RNA	21100	17717	c("GO:0010468", "GO:0031047")
query_1	FALSE	1	93	211	1	0.00473934	0.0107527	GO:0060996	GO:BP	dendritic spine development	21100	17746	c("GO:0016358", "GO:0048856")
query_1	FALSE	1	58	211	1	0.00473934	0.0172414	GO:0060997	GO:BP	dendritic spine morphogenesis	21100	17747	c("GO:0031175", "GO:0048812", "GO:0048813", "GO:0060996", "GO:0097061")
query_1	FALSE	1	55	211	1	0.00473934	0.0181818	GO:0060998	GO:BP	regulation of dendritic spine development	21100	17748	c("GO:0050793", "GO:0060996")
query_1	FALSE	1	37	211	1	0.00473934	0.027027	GO:0060999	GO:BP	positive regulation of dendritic spine development	21100	17749	c("GO:0051094", "GO:0060996", "GO:0060998")
query_1	FALSE	1	44	211	1	0.00473934	0.0227273	GO:0061001	GO:BP	regulation of dendritic spine morphogenesis	21100	17751	c("GO:0010975", "GO:0022603", "GO:0060997", "GO:0099175")
query_1	FALSE	1	19	211	1	0.00473934	0.0526316	GO:0061003	GO:BP	positive regulation of dendritic spine morphogenesis	21100	17753	c("GO:0010976", "GO:0050775", "GO:0060997", "GO:0060999", "GO:0061001")
query_1	FALSE	1	137	211	2	0.00947867	0.0145985	GO:0061008	GO:BP	hepaticobiliary system development	21100	17758	GO:0048731
query_1	FALSE	1	203	211	4	0.0189573	0.0197044	GO:0061013	GO:BP	regulation of mRNA catabolic process	21100	17762	c("GO:0006402", "GO:0010468", "GO:0031329", "GO:1903311")
query_1	FALSE	1	94	211	1	0.00473934	0.0106383	GO:0061014	GO:BP	positive regulation of mRNA catabolic process	21100	17763	c("GO:0006402", "GO:0031331", "GO:0061013", "GO:1903313")
query_1	FALSE	1	77	211	3	0.014218	0.038961	GO:0060761	GO:BP	negative regulation of response to cytokine stimulus	21100	17515	c("GO:0034097", "GO:0048585", "GO:0060759")
query_1	FALSE	1	829	211	16	0.0758294	0.0193004	GO:0061024	GO:BP	membrane organization	21100	17767	GO:0016043
query_1	FALSE	1	49	211	1	0.00473934	0.0204082	GO:0061028	GO:BP	establishment of endothelial barrier	21100	17771	GO:0001885
query_1	FALSE	1	128	211	3	0.014218	0.0234375	GO:0061041	GO:BP	regulation of wound healing	21100	17783	c("GO:0042060", "GO:1903034")
query_1	FALSE	1	19	211	1	0.00473934	0.0526316	GO:0061042	GO:BP	vascular wound healing	21100	17784	GO:0060055
query_1	FALSE	1	11	211	1	0.00473934	0.0909091	GO:0061043	GO:BP	regulation of vascular wound healing	21100	17785	c("GO:0045765", "GO:0061041", "GO:0061042")
query_1	FALSE	1	71	211	1	0.00473934	0.0140845	GO:0061045	GO:BP	negative regulation of wound healing	21100	17787	c("GO:0032102", "GO:0042060", "GO:0061041", "GO:1903035")
query_1	FALSE	1	621	211	7	0.0331754	0.0112721	GO:0061061	GO:BP	muscle structure development	21100	17803	GO:0048856
query_1	FALSE	1	22	211	1	0.00473934	0.0454545	GO:0061081	GO:BP	positive regulation of myeloid leukocyte cytokine production involved in immune response	21100	17823	c("GO:0002720", "GO:0061082")
query_1	FALSE	1	28	211	1	0.00473934	0.0357143	GO:0061082	GO:BP	myeloid leukocyte cytokine production	21100	17824	GO:0002367
query_1	FALSE	1	6	211	1	0.00473934	0.166667	GO:0061091	GO:BP	regulation of phospholipid translocation	21100	17833	c("GO:0045332", "GO:0051128", "GO:0097035", "GO:2001138")
query_1	FALSE	1	5	211	1	0.00473934	0.2	GO:0061092	GO:BP	positive regulation of phospholipid translocation	21100	17834	c("GO:0045332", "GO:0051130", "GO:0061091", "GO:2001140")
query_1	FALSE	1	55	211	4	0.0189573	0.0727273	GO:0061098	GO:BP	positive regulation of protein tyrosine kinase activity	21100	17840	c("GO:0045860", "GO:0050731", "GO:0061097")
query_1	FALSE	1	31	211	2	0.00947867	0.0645161	GO:0061099	GO:BP	negative regulation of protein tyrosine kinase activity	21100	17841	c("GO:0006469", "GO:0050732", "GO:0061097")
query_1	FALSE	1	195	211	1	0.00473934	0.00512821	GO:0061136	GO:BP	regulation of proteasomal protein catabolic process	21100	17875	c("GO:0010498", "GO:1903050")
query_1	FALSE	1	165	211	4	0.0189573	0.0242424	GO:0061025	GO:BP	membrane fusion	21100	17768	GO:0061024
query_1	FALSE	1	88	211	4	0.0189573	0.0454545	GO:0060191	GO:BP	regulation of lipase activity	21100	16983	GO:0051336
query_1	FALSE	1	23	211	1	0.00473934	0.0434783	GO:0060148	GO:BP	positive regulation of post-transcriptional gene silencing	21100	16947	c("GO:0016441", "GO:0048518", "GO:0060147")
query_1	FALSE	1	42	211	1	0.00473934	0.0238095	GO:0060147	GO:BP	regulation of post-transcriptional gene silencing	21100	16946	c("GO:0010468", "GO:0016441")
query_1	FALSE	1	69	211	1	0.00473934	0.0144928	GO:0051310	GO:BP	metaphase plate congression	21100	15753	c("GO:0022402", "GO:0051303", "GO:0098813")
query_1	FALSE	1	267	211	1	0.00473934	0.00374532	GO:0051321	GO:BP	meiotic cell cycle	21100	15761	c("GO:0007049", "GO:0022414")
query_1	FALSE	1	98	211	3	0.014218	0.0306122	GO:0051341	GO:BP	regulation of oxidoreductase activity	21100	15781	GO:0050790
query_1	FALSE	1	353	211	6	0.028436	0.0169972	GO:0051346	GO:BP	negative regulation of hydrolase activity	21100	15786	c("GO:0043086", "GO:0051336")
query_1	FALSE	1	265	211	8	0.0379147	0.0301887	GO:0051348	GO:BP	negative regulation of transferase activity	21100	15788	c("GO:0043086", "GO:0051338")
query_1	FALSE	1	58	211	3	0.014218	0.0517241	GO:0051353	GO:BP	positive regulation of oxidoreductase activity	21100	15793	c("GO:0043085", "GO:0051341")
query_1	FALSE	1	33	211	1	0.00473934	0.030303	GO:0051385	GO:BP	response to mineralocorticoid	21100	15813	GO:0031960
query_1	FALSE	1	242	211	5	0.0236967	0.0206612	GO:0051402	GO:BP	neuron apoptotic process	21100	15823	c("GO:0006915", "GO:0070997")
query_1	FALSE	1	239	211	8	0.0379147	0.0334728	GO:0051403	GO:BP	stress-activated MAPK cascade	21100	15824	c("GO:0000165", "GO:0031098")
query_1	FALSE	1	13	211	1	0.00473934	0.0769231	GO:0051451	GO:BP	myoblast migration	21100	15849	GO:0014812
query_1	FALSE	1	44	211	1	0.00473934	0.0227273	GO:0051452	GO:BP	intracellular pH reduction	21100	15850	GO:0051453
query_1	FALSE	1	77	211	1	0.00473934	0.012987	GO:0051453	GO:BP	regulation of intracellular pH	21100	15851	GO:0030641
query_1	FALSE	1	49	211	1	0.00473934	0.0204082	GO:0051489	GO:BP	regulation of filopodium assembly	21100	15882	c("GO:0046847", "GO:0120032")
query_1	FALSE	1	29	211	1	0.00473934	0.0344828	GO:0051491	GO:BP	positive regulation of filopodium assembly	21100	15884	c("GO:0046847", "GO:0051489", "GO:0120034")
query_1	FALSE	1	90	211	1	0.00473934	0.0111111	GO:0051492	GO:BP	regulation of stress fiber assembly	21100	15885	c("GO:0032231", "GO:0043149", "GO:0110020")
query_1	FALSE	1	529	211	9	0.042654	0.0170132	GO:0051493	GO:BP	regulation of cytoskeleton organization	21100	15886	c("GO:0007010", "GO:0033043")
query_1	FALSE	1	165	211	2	0.00947867	0.0121212	GO:0051494	GO:BP	negative regulation of cytoskeleton organization	21100	15887	c("GO:0007010", "GO:0010639", "GO:0051493")
query_1	FALSE	1	196	211	5	0.0236967	0.0255102	GO:0051495	GO:BP	positive regulation of cytoskeleton organization	21100	15888	c("GO:0007010", "GO:0010638", "GO:0051493")
query_1	FALSE	1	28	211	1	0.00473934	0.0357143	GO:0051497	GO:BP	negative regulation of stress fiber assembly	21100	15890	c("GO:0032232", "GO:0043149", "GO:0051492")
query_1	FALSE	1	104	211	1	0.00473934	0.00961538	GO:0051588	GO:BP	regulation of neurotransmitter transport	21100	15951	c("GO:0006836", "GO:0051049")
query_1	FALSE	1	91	211	2	0.00947867	0.021978	GO:0051591	GO:BP	response to cAMP	21100	15954	c("GO:0014074", "GO:0046683", "GO:1901700")
query_1	FALSE	1	145	211	2	0.00947867	0.0137931	GO:0051592	GO:BP	response to calcium ion	21100	15955	GO:0010038
query_1	FALSE	1	43	211	2	0.00947867	0.0465116	GO:0051602	GO:BP	response to electrical stimulus	21100	15965	GO:0009628
query_1	FALSE	1	778	211	8	0.0379147	0.0102828	GO:0051603	GO:BP	proteolysis involved in cellular protein catabolic process	21100	15966	c("GO:0006508", "GO:0044257")
query_1	FALSE	1	313	211	3	0.014218	0.00958466	GO:0051604	GO:BP	protein maturation	21100	15967	c("GO:0010467", "GO:0019538")
query_1	FALSE	1	645	211	2	0.00947867	0.00310078	GO:0051606	GO:BP	detection of stimulus	21100	15968	GO:0050896
query_1	FALSE	1	11	211	1	0.00473934	0.0909091	GO:0051608	GO:BP	histamine transport	21100	15970	c("GO:0006812", "GO:0071702", "GO:0071705")
query_1	FALSE	1	86	211	1	0.00473934	0.0116279	GO:0051303	GO:BP	establishment of chromosome localization	21100	15746	c("GO:0050000", "GO:0051649", "GO:0051656")
query_1	FALSE	1	186	211	1	0.00473934	0.00537634	GO:0051302	GO:BP	regulation of cell division	21100	15745	c("GO:0050794", "GO:0051301")
query_1	FALSE	1	646	211	1	0.00473934	0.00154799	GO:0051301	GO:BP	cell division	21100	15744	GO:0009987
query_1	FALSE	1	15	211	1	0.00473934	0.0666667	GO:0051299	GO:BP	centrosome separation	21100	15742	c("GO:0007098", "GO:0022402")
query_1	FALSE	1	82	211	1	0.00473934	0.0121951	GO:0051153	GO:BP	regulation of striated muscle cell differentiation	21100	15622	c("GO:0051146", "GO:0051147")
query_1	FALSE	1	24	211	1	0.00473934	0.0416667	GO:0051156	GO:BP	glucose 6-phosphate metabolic process	21100	15625	c("GO:0006796", "GO:0019637", "GO:1901135")
query_1	FALSE	1	155	211	1	0.00473934	0.00645161	GO:0051168	GO:BP	nuclear export	21100	15637	GO:0006913
query_1	FALSE	1	313	211	3	0.014218	0.00958466	GO:0051169	GO:BP	nuclear transport	21100	15638	GO:0046907
query_1	FALSE	1	167	211	3	0.014218	0.0179641	GO:0051170	GO:BP	import into nucleus	21100	15639	GO:0006913
query_1	FALSE	1	5654	211	78	0.369668	0.0137955	GO:0051171	GO:BP	regulation of nitrogen compound metabolic process	21100	15640	c("GO:0006807", "GO:0019222")
query_1	FALSE	1	2371	211	29	0.137441	0.0122311	GO:0051172	GO:BP	negative regulation of nitrogen compound metabolic process	21100	15641	c("GO:0006807", "GO:0009892", "GO:0051171")
query_1	FALSE	1	45	211	2	0.00947867	0.0444444	GO:0051180	GO:BP	vitamin transport	21100	15649	GO:0006810
query_1	FALSE	1	6	211	1	0.00473934	0.166667	GO:0051189	GO:BP	prosthetic group metabolic process	21100	15655	c("GO:0008152", "GO:0044267")
query_1	FALSE	1	31	211	1	0.00473934	0.0322581	GO:0051204	GO:BP	protein insertion into mitochondrial membrane	21100	15669	c("GO:0006839", "GO:0006886", "GO:0051205", "GO:0070585", "GO:0090151")
query_1	FALSE	1	67	211	1	0.00473934	0.0149254	GO:0051205	GO:BP	protein insertion into membrane	21100	15670	c("GO:0034613", "GO:0061024", "GO:0090150")
query_1	FALSE	1	199	211	1	0.00473934	0.00502513	GO:0051216	GO:BP	cartilage development	21100	15678	c("GO:0001501", "GO:0048513", "GO:0061448")
query_1	FALSE	1	300	211	6	0.028436	0.02	GO:0051222	GO:BP	positive regulation of protein transport	21100	15683	c("GO:0015031", "GO:0051050", "GO:0051223", "GO:1904951")
query_1	FALSE	1	542	211	10	0.0473934	0.0184502	GO:0051640	GO:BP	organelle localization	21100	15999	GO:0051641
query_1	FALSE	1	498	211	7	0.0331754	0.0140562	GO:0051223	GO:BP	regulation of protein transport	21100	15684	c("GO:0015031", "GO:0051049", "GO:0070201")
query_1	FALSE	1	1034	211	18	0.0853081	0.0174081	GO:0051248	GO:BP	negative regulation of protein metabolic process	21100	15703	c("GO:0010605", "GO:0019538", "GO:0051172", "GO:0051246")
query_1	FALSE	1	3753	211	48	0.227488	0.0127898	GO:0051252	GO:BP	regulation of RNA metabolic process	21100	15707	c("GO:0016070", "GO:0019219", "GO:0060255")
query_1	FALSE	1	1409	211	13	0.0616114	0.0092264	GO:0051253	GO:BP	negative regulation of RNA metabolic process	21100	15708	c("GO:0010605", "GO:0016070", "GO:0045934", "GO:0051252")
query_1	FALSE	1	1769	211	27	0.127962	0.0152629	GO:0051254	GO:BP	positive regulation of RNA metabolic process	21100	15709	c("GO:0010604", "GO:0016070", "GO:0045935", "GO:0051252")
query_1	FALSE	1	277	211	6	0.028436	0.0216606	GO:0051258	GO:BP	protein polymerization	21100	15713	GO:0065003
query_1	FALSE	1	253	211	5	0.0236967	0.0197628	GO:0051259	GO:BP	protein complex oligomerization	21100	15714	GO:0065003
query_1	FALSE	1	193	211	5	0.0236967	0.0259067	GO:0051260	GO:BP	protein homooligomerization	21100	15715	GO:0051259
query_1	FALSE	1	122	211	1	0.00473934	0.00819672	GO:0051261	GO:BP	protein depolymerization	21100	15716	GO:0032984
query_1	FALSE	1	89	211	3	0.014218	0.0337079	GO:0051262	GO:BP	protein tetramerization	21100	15717	GO:0051259
query_1	FALSE	1	289	211	3	0.014218	0.0103806	GO:0051271	GO:BP	negative regulation of cellular component movement	21100	15720	c("GO:0006928", "GO:0048523", "GO:0051270")
query_1	FALSE	1	1059	211	3	0.014218	0.00283286	GO:0051276	GO:BP	chromosome organization	21100	15725	GO:0006996
query_1	FALSE	1	57	211	3	0.014218	0.0526316	GO:0051289	GO:BP	protein homotetramerization	21100	15733	c("GO:0051260", "GO:0051262")
query_1	FALSE	1	73	211	1	0.00473934	0.0136986	GO:0051298	GO:BP	centrosome duplication	21100	15741	c("GO:0007098", "GO:0022402")
query_1	FALSE	1	166	211	1	0.00473934	0.0060241	GO:0051236	GO:BP	establishment of RNA localization	21100	15694	c("GO:0006403", "GO:0051234")
query_1	FALSE	1	190	211	2	0.00947867	0.0105263	GO:0051648	GO:BP	vesicle localization	21100	16007	GO:0051640
query_1	FALSE	1	2196	211	24	0.113744	0.010929	GO:0051649	GO:BP	establishment of localization in cell	21100	16008	c("GO:0051234", "GO:0051641")
query_1	FALSE	1	173	211	2	0.00947867	0.0115607	GO:0051650	GO:BP	establishment of vesicle localization	21100	16009	c("GO:0051648", "GO:0051649", "GO:0051656")
query_1	FALSE	1	69	211	1	0.00473934	0.0144928	GO:0055017	GO:BP	cardiac muscle tissue growth	21100	16745	c("GO:0048589", "GO:0048738", "GO:0060419")
query_1	FALSE	1	53	211	1	0.00473934	0.0188679	GO:0055021	GO:BP	regulation of cardiac muscle tissue growth	21100	16749	c("GO:0055017", "GO:0060420")
query_1	FALSE	1	28	211	1	0.00473934	0.0357143	GO:0055023	GO:BP	positive regulation of cardiac muscle tissue growth	21100	16751	c("GO:0055017", "GO:0055021", "GO:0060421")
query_1	FALSE	1	17	211	1	0.00473934	0.0588235	GO:0055064	GO:BP	chloride ion homeostasis	21100	16769	GO:0055083
query_1	FALSE	1	153	211	2	0.00947867	0.0130719	GO:0055067	GO:BP	monovalent inorganic cation homeostasis	21100	16772	c("GO:0055080", "GO:0098771")
query_1	FALSE	1	83	211	2	0.00947867	0.0240964	GO:0055072	GO:BP	iron ion homeostasis	21100	16777	GO:0055076
query_1	FALSE	1	136	211	2	0.00947867	0.0147059	GO:0055076	GO:BP	transition metal ion homeostasis	21100	16781	GO:0055065
query_1	FALSE	1	43	211	1	0.00473934	0.0232558	GO:0055081	GO:BP	anion homeostasis	21100	16785	GO:0050801
query_1	FALSE	1	17	211	1	0.00473934	0.0588235	GO:0055083	GO:BP	monovalent inorganic anion homeostasis	21100	16787	c("GO:0055081", "GO:0098771")
query_1	FALSE	1	562	211	10	0.0473934	0.0177936	GO:0055086	GO:BP	nucleobase-containing small molecule metabolic process	21100	16789	c("GO:0006139", "GO:0044281")
query_1	FALSE	1	20	211	1	0.00473934	0.05	GO:0055093	GO:BP	response to hyperoxia	21100	16795	c("GO:0006950", "GO:0036296")
query_1	FALSE	1	29	211	1	0.00473934	0.0344828	GO:0055094	GO:BP	response to lipoprotein particle	21100	16796	c("GO:0009719", "GO:0010243")
query_1	FALSE	1	20	211	1	0.00473934	0.05	GO:0060004	GO:BP	reflex	21100	16821	GO:0009605
query_1	FALSE	1	178	211	1	0.00473934	0.00561798	GO:0055001	GO:BP	muscle cell development	21100	16729	c("GO:0042692", "GO:0048468")
query_1	FALSE	1	9	211	1	0.00473934	0.111111	GO:0060013	GO:BP	righting reflex	21100	16830	GO:0060004
query_1	FALSE	1	47	211	1	0.00473934	0.0212766	GO:0060038	GO:BP	cardiac muscle cell proliferation	21100	16855	c("GO:0014855", "GO:0055017")
query_1	FALSE	1	38	211	1	0.00473934	0.0263158	GO:0060043	GO:BP	regulation of cardiac muscle cell proliferation	21100	16860	c("GO:0042127", "GO:0055021", "GO:0060038")
query_1	FALSE	1	23	211	1	0.00473934	0.0434783	GO:0060045	GO:BP	positive regulation of cardiac muscle cell proliferation	21100	16862	c("GO:0008284", "GO:0055023", "GO:0060038", "GO:0060043")
query_1	FALSE	1	239	211	1	0.00473934	0.0041841	GO:0060047	GO:BP	heart contraction	21100	16864	c("GO:0003015", "GO:0008015")
query_1	FALSE	1	17	211	1	0.00473934	0.0588235	GO:0060049	GO:BP	regulation of protein glycosylation	21100	16866	c("GO:0006486", "GO:0010559", "GO:0031399")
query_1	FALSE	1	11	211	1	0.00473934	0.0909091	GO:0060050	GO:BP	positive regulation of protein glycosylation	21100	16867	c("GO:0006486", "GO:0010560", "GO:0031401", "GO:0060049")
query_1	FALSE	1	28	211	1	0.00473934	0.0357143	GO:0060055	GO:BP	angiogenesis involved in wound healing	21100	16871	c("GO:0001525", "GO:0042060")
query_1	FALSE	1	325	211	4	0.0189573	0.0123077	GO:0060070	GO:BP	canonical Wnt signaling pathway	21100	16886	GO:0016055
query_1	FALSE	1	73	211	2	0.00947867	0.0273973	GO:0060071	GO:BP	Wnt signaling pathway, planar cell polarity pathway	21100	16887	c("GO:0035567", "GO:0090175")
query_1	FALSE	1	11	211	1	0.00473934	0.0909091	GO:0060081	GO:BP	membrane hyperpolarization	21100	16894	GO:0042391
query_1	FALSE	1	16	211	1	0.00473934	0.0625	GO:0060099	GO:BP	regulation of phagocytosis, engulfment	21100	16909	c("GO:0006911", "GO:0030100", "GO:0050764", "GO:1905153")
query_1	FALSE	1	14	211	1	0.00473934	0.0714286	GO:0060100	GO:BP	positive regulation of phagocytosis, engulfment	21100	16910	c("GO:0006911", "GO:0045807", "GO:0050766", "GO:0060099", "GO:1905155")
query_1	FALSE	1	24	211	2	0.00947867	0.0833333	GO:0060143	GO:BP	positive regulation of syncytium formation by plasma membrane fusion	21100	16943	c("GO:0000768", "GO:0051094", "GO:0051130", "GO:0060142")
query_1	FALSE	1	9	211	2	0.00947867	0.222222	GO:0060020	GO:BP	Bergmann glial cell differentiation	21100	16837	GO:0048708
query_1	FALSE	1	323	211	8	0.0379147	0.0247678	GO:0062197	GO:BP	cellular response to chemical stress	21100	18583	c("GO:0033554", "GO:0070887")
query_1	FALSE	1	412	211	9	0.042654	0.0218447	GO:0052548	GO:BP	regulation of endopeptidase activity	21100	16660	GO:0052547
query_1	FALSE	1	52	211	2	0.00947867	0.0384615	GO:0052372	GO:BP	modulation by symbiont of entry into host	21100	16523	c("GO:0043903", "GO:0044409")
query_1	FALSE	1	410	211	8	0.0379147	0.0195122	GO:0051656	GO:BP	establishment of organelle localization	21100	16015	c("GO:0051234", "GO:0051640")
query_1	FALSE	1	877	211	9	0.042654	0.0102623	GO:0051668	GO:BP	localization within membrane	21100	16026	GO:0051641
query_1	FALSE	1	194	211	6	0.028436	0.0309278	GO:0051701	GO:BP	biological process involved in interaction with host	21100	16051	GO:0044403
query_1	FALSE	1	102	211	3	0.014218	0.0294118	GO:0051702	GO:BP	biological process involved in interaction with symbiont	21100	16052	GO:0044403
query_1	FALSE	1	8	211	2	0.00947867	0.25	GO:0051709	GO:BP	regulation of killing of cells of another organism	21100	16057	c("GO:0031341", "GO:0031640", "GO:0035821")
query_1	FALSE	1	6	211	2	0.00947867	0.333333	GO:0051712	GO:BP	positive regulation of killing of cells of another organism	21100	16060	c("GO:0031343", "GO:0031640", "GO:0043068", "GO:0051709")
query_1	FALSE	1	1089	211	15	0.07109	0.0137741	GO:0051726	GO:BP	regulation of cell cycle	21100	16066	c("GO:0007049", "GO:0050794")
query_1	FALSE	1	20	211	2	0.00947867	0.1	GO:0051767	GO:BP	nitric-oxide synthase biosynthetic process	21100	16081	GO:0009059
query_1	FALSE	1	20	211	2	0.00947867	0.1	GO:0051769	GO:BP	regulation of nitric-oxide synthase biosynthetic process	21100	16082	c("GO:0010556", "GO:0051767")
query_1	FALSE	1	17	211	2	0.00947867	0.117647	GO:0051770	GO:BP	positive regulation of nitric-oxide synthase biosynthetic process	21100	16083	c("GO:0010557", "GO:0051767", "GO:0051769")
query_1	FALSE	1	89	211	1	0.00473934	0.011236	GO:0051781	GO:BP	positive regulation of cell division	21100	16088	c("GO:0048522", "GO:0051301", "GO:0051302")
query_1	FALSE	1	141	211	1	0.00473934	0.0070922	GO:0051783	GO:BP	regulation of nuclear division	21100	16090	c("GO:0000280", "GO:0033043")
query_1	FALSE	1	61	211	1	0.00473934	0.0163934	GO:0051785	GO:BP	positive regulation of nuclear division	21100	16092	c("GO:0000280", "GO:0010638", "GO:0051783")
query_1	FALSE	1	440	211	9	0.042654	0.0204545	GO:0052547	GO:BP	regulation of peptidase activity	21100	16659	c("GO:0030162", "GO:0051336")
query_1	FALSE	1	67	211	3	0.014218	0.0447761	GO:0051851	GO:BP	modulation by host of symbiont process	21100	16135	GO:0051702
query_1	FALSE	1	168	211	5	0.0236967	0.0297619	GO:0051896	GO:BP	regulation of protein kinase B signaling	21100	16169	c("GO:0043491", "GO:1902531")
query_1	FALSE	1	114	211	3	0.014218	0.0263158	GO:0051897	GO:BP	positive regulation of protein kinase B signaling	21100	16170	c("GO:0043491", "GO:0051896", "GO:1902533")
query_1	FALSE	1	42	211	2	0.00947867	0.047619	GO:0051898	GO:BP	negative regulation of protein kinase B signaling	21100	16171	c("GO:0043491", "GO:0051896", "GO:1902532")
query_1	FALSE	1	437	211	10	0.0473934	0.0228833	GO:0051960	GO:BP	regulation of nervous system development	21100	16221	c("GO:0007399", "GO:2000026")
query_1	FALSE	1	142	211	1	0.00473934	0.00704225	GO:0051961	GO:BP	negative regulation of nervous system development	21100	16222	c("GO:0007399", "GO:0051093", "GO:0051241", "GO:0051960")
query_1	FALSE	1	270	211	8	0.0379147	0.0296296	GO:0051962	GO:BP	positive regulation of nervous system development	21100	16223	c("GO:0007399", "GO:0051094", "GO:0051240", "GO:0051960")
query_1	FALSE	1	103	211	1	0.00473934	0.00970874	GO:0051963	GO:BP	regulation of synapse assembly	21100	16224	c("GO:0007416", "GO:0050807", "GO:1901888")
query_1	FALSE	1	63	211	1	0.00473934	0.015873	GO:0051965	GO:BP	positive regulation of synapse assembly	21100	16226	c("GO:0007416", "GO:0051962", "GO:0051963", "GO:1901890")
query_1	FALSE	1	71	211	1	0.00473934	0.0140845	GO:0051966	GO:BP	regulation of synaptic transmission, glutamatergic	21100	16227	c("GO:0035249", "GO:0050804")
query_1	FALSE	1	30	211	1	0.00473934	0.0333333	GO:0051968	GO:BP	positive regulation of synaptic transmission, glutamatergic	21100	16229	c("GO:0035249", "GO:0050806", "GO:0051966")
query_1	FALSE	1	50	211	1	0.00473934	0.02	GO:0051972	GO:BP	regulation of telomerase activity	21100	16233	c("GO:0051338", "GO:2000278")
query_1	FALSE	1	34	211	1	0.00473934	0.0294118	GO:0051973	GO:BP	positive regulation of telomerase activity	21100	16234	c("GO:0051347", "GO:0051972", "GO:2000573")
query_1	FALSE	1	179	211	6	0.028436	0.0335196	GO:0052126	GO:BP	movement in host environment	21100	16350	GO:0051701
query_1	FALSE	1	68	211	1	0.00473934	0.0147059	GO:0051881	GO:BP	regulation of mitochondrial membrane potential	21100	16154	GO:0042391
query_1	FALSE	1	246	211	2	0.00947867	0.00813008	GO:0090305	GO:BP	nucleic acid phosphodiester bond hydrolysis	21100	21316	GO:0090304
query_1	FALSE	1	102	211	6	0.028436	0.0588235	GO:0062207	GO:BP	regulation of pattern recognition receptor signaling pathway	21100	18585	c("GO:0002221", "GO:0009966", "GO:0050776")
query_1	FALSE	1	2	211	1	0.00473934	0.5	GO:0062234	GO:BP	platelet activating factor catabolic process	21100	18602	c("GO:0044269", "GO:0046469", "GO:0046475", "GO:1901565")
query_1	FALSE	1	3	211	1	0.00473934	0.333333	GO:0071725	GO:BP	response to triacyl bacterial lipopeptide	21100	19701	GO:0070339
query_1	FALSE	1	4	211	1	0.00473934	0.25	GO:0071726	GO:BP	cellular response to diacyl bacterial lipopeptide	21100	19702	c("GO:0071221", "GO:0071724")
query_1	FALSE	1	3	211	1	0.00473934	0.333333	GO:0071727	GO:BP	cellular response to triacyl bacterial lipopeptide	21100	19703	c("GO:0071221", "GO:0071725")
query_1	FALSE	1	21	211	1	0.00473934	0.047619	GO:0071731	GO:BP	response to nitric oxide	21100	19707	c("GO:0010035", "GO:1901698", "GO:1901700")
query_1	FALSE	1	43	211	2	0.00947867	0.0465116	GO:0071763	GO:BP	nuclear membrane organization	21100	19710	c("GO:0006998", "GO:0061024")
query_1	FALSE	1	110	211	2	0.00947867	0.0181818	GO:0071774	GO:BP	response to fibroblast growth factor	21100	19720	c("GO:0009719", "GO:0070848")
query_1	FALSE	1	269	211	2	0.00947867	0.00743494	GO:0071824	GO:BP	protein-DNA complex subunit organization	21100	19744	GO:0043933
query_1	FALSE	1	47	211	1	0.00473934	0.0212766	GO:0071825	GO:BP	protein-lipid complex subunit organization	21100	19745	GO:0043933
query_1	FALSE	1	44	211	1	0.00473934	0.0227273	GO:0071827	GO:BP	plasma lipoprotein particle organization	21100	19747	c("GO:0032501", "GO:0071825")
query_1	FALSE	1	8070	211	80	0.379147	0.00991326	GO:0071840	GO:BP	cellular component organization or biogenesis	21100	19757	GO:0009987
query_1	FALSE	1	103	211	1	0.00473934	0.00970874	GO:0071867	GO:BP	response to monoamine	21100	19770	GO:0010243
query_1	FALSE	1	100	211	1	0.00473934	0.01	GO:0071868	GO:BP	cellular response to monoamine stimulus	21100	19771	c("GO:0071417", "GO:0071867")
query_1	FALSE	1	103	211	1	0.00473934	0.00970874	GO:0071869	GO:BP	response to catecholamine	21100	19772	c("GO:0014070", "GO:0071867", "GO:1901700")
query_1	FALSE	1	100	211	1	0.00473934	0.01	GO:0071870	GO:BP	cellular response to catecholamine stimulus	21100	19773	c("GO:0071407", "GO:0071868", "GO:0071869", "GO:1901701")
query_1	FALSE	1	197	211	1	0.00473934	0.00507614	GO:0071897	GO:BP	DNA biosynthetic process	21100	19795	c("GO:0006259", "GO:0009059", "GO:0034654")
query_1	FALSE	1	383	211	9	0.042654	0.0234987	GO:0071900	GO:BP	regulation of protein serine/threonine kinase activity	21100	19798	GO:0045859
query_1	FALSE	1	113	211	3	0.014218	0.0265487	GO:0071901	GO:BP	negative regulation of protein serine/threonine kinase activity	21100	19799	c("GO:0006469", "GO:0071900")
query_1	FALSE	1	225	211	6	0.028436	0.0266667	GO:0071902	GO:BP	positive regulation of protein serine/threonine kinase activity	21100	19800	c("GO:0045860", "GO:0071900")
query_1	FALSE	1	9	211	1	0.00473934	0.111111	GO:0071918	GO:BP	urea transmembrane transport	21100	19811	c("GO:0015840", "GO:0055085")
query_1	FALSE	1	12	211	1	0.00473934	0.0833333	GO:0071947	GO:BP	protein deubiquitination involved in ubiquitin-dependent protein catabolic process	21100	19833	c("GO:0006511", "GO:0016579", "GO:0051603")
query_1	FALSE	1	1	211	1	0.00473934	1	GO:0071976	GO:BP	cell gliding	21100	19852	GO:0048870
query_1	FALSE	1	314	211	1	0.00473934	0.00318471	GO:0072001	GO:BP	renal system development	21100	19872	c("GO:0001655", "GO:0048731")
query_1	FALSE	1	73	211	2	0.00947867	0.0273973	GO:0072089	GO:BP	stem cell proliferation	21100	19957	GO:0008283
query_1	FALSE	1	47	211	2	0.00947867	0.0425532	GO:0072091	GO:BP	regulation of stem cell proliferation	21100	19959	c("GO:0042127", "GO:0072089")
query_1	FALSE	1	141	211	1	0.00473934	0.0070922	GO:0072175	GO:BP	epithelial tube formation	21100	20043	c("GO:0035148", "GO:0060562")
query_1	FALSE	1	124	211	1	0.00473934	0.00806452	GO:0072329	GO:BP	monocarboxylic acid catabolic process	21100	20192	c("GO:0032787", "GO:0046395")
query_1	FALSE	1	206	211	1	0.00473934	0.00485437	GO:0072330	GO:BP	monocarboxylic acid biosynthetic process	21100	20193	c("GO:0032787", "GO:0046394")
query_1	FALSE	1	4	211	1	0.00473934	0.25	GO:0071724	GO:BP	response to diacyl bacterial lipopeptide	21100	19700	GO:0070339
query_1	FALSE	1	2233	211	26	0.123223	0.0116435	GO:0071705	GO:BP	nitrogen compound transport	21100	19684	GO:0006810
query_1	FALSE	1	13889	211	129	0.611374	0.00928793	GO:0071704	GO:BP	organic substance metabolic process	21100	19683	GO:0008152
query_1	FALSE	1	2654	211	28	0.132701	0.0105501	GO:0071702	GO:BP	organic substance transport	21100	19681	GO:0006810
query_1	FALSE	1	75	211	1	0.00473934	0.0133333	GO:0071479	GO:BP	cellular response to ionizing radiation	21100	19500	c("GO:0010212", "GO:0071478")
query_1	FALSE	1	29	211	1	0.00473934	0.0344828	GO:0071480	GO:BP	cellular response to gamma radiation	21100	19501	c("GO:0010332", "GO:0071479")
query_1	FALSE	1	1316	211	12	0.056872	0.00911854	GO:0071495	GO:BP	cellular response to endogenous stimulus	21100	19516	GO:0009719
query_1	FALSE	1	317	211	10	0.0473934	0.0315457	GO:0071496	GO:BP	cellular response to external stimulus	21100	19517	GO:0009605
query_1	FALSE	1	43	211	1	0.00473934	0.0232558	GO:0071526	GO:BP	semaphorin-plexin signaling pathway	21100	19543	GO:0007166
query_1	FALSE	1	33	211	1	0.00473934	0.030303	GO:0071539	GO:BP	protein localization to centrosome	21100	19554	GO:1905508
query_1	FALSE	1	245	211	2	0.00947867	0.00816327	GO:0071559	GO:BP	response to transforming growth factor beta	21100	19566	c("GO:0009719", "GO:0070848")
query_1	FALSE	1	239	211	1	0.00473934	0.0041841	GO:0071560	GO:BP	cellular response to transforming growth factor beta stimulus	21100	19567	c("GO:0071363", "GO:0071495", "GO:0071559")
query_1	FALSE	1	5	211	2	0.00947867	0.4	GO:0071593	GO:BP	lymphocyte aggregation	21100	19591	GO:0070486
query_1	FALSE	1	20	211	2	0.00947867	0.1	GO:0071605	GO:BP	monocyte chemotactic protein-1 production	21100	19599	GO:0032602
query_1	FALSE	1	6	211	2	0.00947867	0.333333	GO:0071608	GO:BP	macrophage inflammatory protein-1 alpha production	21100	19602	GO:0032602
query_1	FALSE	1	12	211	2	0.00947867	0.166667	GO:0071609	GO:BP	chemokine (C-C motif) ligand 5 production	21100	19603	GO:0032602
query_1	FALSE	1	4	211	1	0.00473934	0.25	GO:0071612	GO:BP	IP-10 production	21100	19606	GO:0032602
query_1	FALSE	1	175	211	2	0.00947867	0.0114286	GO:0072331	GO:BP	signal transduction by p53 class mediator	21100	20194	GO:0035556
query_1	FALSE	1	27	211	2	0.00947867	0.0740741	GO:0071624	GO:BP	positive regulation of granulocyte chemotaxis	21100	19615	c("GO:0002690", "GO:0071621", "GO:0071622")
query_1	FALSE	1	14	211	2	0.00947867	0.142857	GO:0071639	GO:BP	positive regulation of monocyte chemotactic protein-1 production	21100	19627	c("GO:0032722", "GO:0071605", "GO:0071637")
query_1	FALSE	1	6	211	2	0.00947867	0.333333	GO:0071640	GO:BP	regulation of macrophage inflammatory protein 1 alpha production	21100	19628	c("GO:0032642", "GO:0071608")
query_1	FALSE	1	3	211	1	0.00473934	0.333333	GO:0071641	GO:BP	negative regulation of macrophage inflammatory protein 1 alpha production	21100	19629	c("GO:0032682", "GO:0071608", "GO:0071640")
query_1	FALSE	1	2	211	1	0.00473934	0.5	GO:0071642	GO:BP	positive regulation of macrophage inflammatory protein 1 alpha production	21100	19630	c("GO:0032722", "GO:0071608", "GO:0071640")
query_1	FALSE	1	12	211	2	0.00947867	0.166667	GO:0071649	GO:BP	regulation of chemokine (C-C motif) ligand 5 production	21100	19637	c("GO:0032642", "GO:0071609")
query_1	FALSE	1	5	211	1	0.00473934	0.2	GO:0071650	GO:BP	negative regulation of chemokine (C-C motif) ligand 5 production	21100	19638	c("GO:0032682", "GO:0071609", "GO:0071649")
query_1	FALSE	1	7	211	1	0.00473934	0.142857	GO:0071651	GO:BP	positive regulation of chemokine (C-C motif) ligand 5 production	21100	19639	c("GO:0032722", "GO:0071609", "GO:0071649")
query_1	FALSE	1	4	211	1	0.00473934	0.25	GO:0071658	GO:BP	regulation of IP-10 production	21100	19646	c("GO:0032642", "GO:0071612")
query_1	FALSE	1	3	211	1	0.00473934	0.333333	GO:0071659	GO:BP	negative regulation of IP-10 production	21100	19647	c("GO:0032682", "GO:0071612", "GO:0071658")
query_1	FALSE	1	22	211	1	0.00473934	0.0454545	GO:0071676	GO:BP	negative regulation of mononuclear cell migration	21100	19660	c("GO:0002686", "GO:0071674", "GO:0071675")
query_1	FALSE	1	1	211	1	0.00473934	1	GO:0071678	GO:BP	olfactory bulb axon guidance	21100	19662	GO:0007411
query_1	FALSE	1	347	211	4	0.0189573	0.0115274	GO:0071692	GO:BP	protein localization to extracellular region	21100	19671	GO:0008104
query_1	FALSE	1	248	211	3	0.014218	0.0120968	GO:0071695	GO:BP	anatomical structure maturation	21100	19674	c("GO:0021700", "GO:0048856")
query_1	FALSE	1	20	211	2	0.00947867	0.1	GO:0071637	GO:BP	regulation of monocyte chemotactic protein-1 production	21100	19625	c("GO:0032642", "GO:0071605")
query_1	FALSE	1	188	211	1	0.00473934	0.00531915	GO:0071478	GO:BP	cellular response to radiation	21100	19499	c("GO:0009314", "GO:0071214")
query_1	FALSE	1	1099	211	17	0.0805687	0.0154686	GO:0072359	GO:BP	circulatory system development	21100	20215	GO:0048731
query_1	FALSE	1	38	211	2	0.00947867	0.0526316	GO:0072524	GO:BP	pyridine-containing compound metabolic process	21100	20316	c("GO:0034641", "GO:0046483", "GO:1901360", "GO:1901564")
query_1	FALSE	1	32	211	3	0.014218	0.09375	GO:0090022	GO:BP	regulation of neutrophil chemotaxis	21100	21050	c("GO:0030593", "GO:0071622", "GO:1902622")
query_1	FALSE	1	24	211	2	0.00947867	0.0833333	GO:0090023	GO:BP	positive regulation of neutrophil chemotaxis	21100	21051	c("GO:0030593", "GO:0071624", "GO:0090022", "GO:1902624")
query_1	FALSE	1	18	211	1	0.00473934	0.0555556	GO:0090036	GO:BP	regulation of protein kinase C signaling	21100	21064	c("GO:0070528", "GO:1902531")
query_1	FALSE	1	10	211	1	0.00473934	0.1	GO:0090037	GO:BP	positive regulation of protein kinase C signaling	21100	21065	c("GO:0070528", "GO:0090036", "GO:1902533")
query_1	FALSE	1	248	211	2	0.00947867	0.00806452	GO:0090068	GO:BP	positive regulation of cell cycle process	21100	21092	c("GO:0010564", "GO:0022402", "GO:0045787")
query_1	FALSE	1	186	211	3	0.014218	0.016129	GO:0090087	GO:BP	regulation of peptide transport	21100	21110	c("GO:0015833", "GO:0051049")
query_1	FALSE	1	159	211	3	0.014218	0.0188679	GO:0090090	GO:BP	negative regulation of canonical Wnt signaling pathway	21100	21113	c("GO:0030178", "GO:0060070", "GO:0060828")
query_1	FALSE	1	302	211	6	0.028436	0.0198675	GO:0090130	GO:BP	tissue migration	21100	21149	GO:0032501
query_1	FALSE	1	296	211	6	0.028436	0.0202703	GO:0090132	GO:BP	epithelium migration	21100	21151	GO:0090130
query_1	FALSE	1	489	211	3	0.014218	0.00613497	GO:0090150	GO:BP	establishment of protein localization to membrane	21100	21168	c("GO:0045184", "GO:0072657")
query_1	FALSE	1	35	211	1	0.00473934	0.0285714	GO:0090151	GO:BP	establishment of protein localization to mitochondrial membrane	21100	21169	c("GO:0007006", "GO:0051649", "GO:0072655", "GO:0090150")
query_1	FALSE	1	4	211	2	0.00947867	0.5	GO:0090170	GO:BP	regulation of Golgi inheritance	21100	21187	c("GO:0048313", "GO:1903358")
query_1	FALSE	1	109	211	4	0.0189573	0.0366972	GO:0090174	GO:BP	organelle membrane fusion	21100	21191	c("GO:0048284", "GO:0061025")
query_1	FALSE	1	77	211	2	0.00947867	0.025974	GO:0090175	GO:BP	regulation of establishment of planar polarity	21100	21192	c("GO:0001736", "GO:2000027")
query_1	FALSE	1	40	211	1	0.00473934	0.025	GO:0090207	GO:BP	regulation of triglyceride metabolic process	21100	21220	c("GO:0006641", "GO:0019216", "GO:0031323")
query_1	FALSE	1	10	211	1	0.00473934	0.1	GO:0090209	GO:BP	negative regulation of triglyceride metabolic process	21100	21222	c("GO:0006641", "GO:0031324", "GO:0045833", "GO:0090207")
query_1	FALSE	1	44	211	1	0.00473934	0.0227273	GO:0090224	GO:BP	regulation of spindle organization	21100	21237	c("GO:0007051", "GO:0010564", "GO:0070507")
query_1	FALSE	1	227	211	1	0.00473934	0.00440529	GO:0090257	GO:BP	regulation of muscle system process	21100	21269	c("GO:0003012", "GO:0044057")
query_1	FALSE	1	125	211	2	0.00947867	0.016	GO:0090263	GO:BP	positive regulation of canonical Wnt signaling pathway	21100	21275	c("GO:0030177", "GO:0060070", "GO:0060828")
query_1	FALSE	1	180	211	3	0.014218	0.0166667	GO:0090276	GO:BP	regulation of peptide hormone secretion	21100	21288	c("GO:0002791", "GO:0030072", "GO:0046883")
query_1	FALSE	1	92	211	1	0.00473934	0.0108696	GO:0090277	GO:BP	positive regulation of peptide hormone secretion	21100	21289	c("GO:0002793", "GO:0030072", "GO:0046887", "GO:0090276")
query_1	FALSE	1	34	211	2	0.00947867	0.0588235	GO:0090279	GO:BP	regulation of calcium ion import	21100	21291	c("GO:0051924", "GO:0070509")
query_1	FALSE	1	16	211	2	0.00947867	0.125	GO:0090280	GO:BP	positive regulation of calcium ion import	21100	21292	c("GO:0051928", "GO:0070509", "GO:0090279")
query_1	FALSE	1	295	211	1	0.00473934	0.00338983	GO:0090287	GO:BP	regulation of cellular response to growth factor stimulus	21100	21299	c("GO:0048583", "GO:0050794", "GO:0071363")
query_1	FALSE	1	4	211	1	0.00473934	0.25	GO:0090289	GO:BP	regulation of osteoclast proliferation	21100	21301	c("GO:0002158", "GO:0070663")
query_1	FALSE	1	2	211	1	0.00473934	0.5	GO:0090291	GO:BP	negative regulation of osteoclast proliferation	21100	21303	c("GO:0002158", "GO:0070664", "GO:0090289")
query_1	FALSE	1	58	211	1	0.00473934	0.0172414	GO:0090303	GO:BP	positive regulation of wound healing	21100	21314	c("GO:0042060", "GO:0061041", "GO:1903036")
query_1	FALSE	1	77	211	1	0.00473934	0.012987	GO:0080171	GO:BP	lytic vacuole organization	21100	20905	GO:0007033
query_1	FALSE	1	58	211	3	0.014218	0.0517241	GO:0080164	GO:BP	regulation of nitric oxide metabolic process	21100	20898	c("GO:0046209", "GO:0051171")
query_1	FALSE	1	657	211	12	0.056872	0.0182648	GO:0080135	GO:BP	regulation of cellular response to stress	21100	20875	c("GO:0033554", "GO:0050794", "GO:0080134")
query_1	FALSE	1	28	211	2	0.00947867	0.0714286	GO:0080111	GO:BP	DNA demethylation	21100	20861	c("GO:0035510", "GO:0044728", "GO:0070988")
query_1	FALSE	1	31	211	2	0.00947867	0.0645161	GO:0072525	GO:BP	pyridine-containing compound biosynthetic process	21100	20317	c("GO:0018130", "GO:0044271", "GO:0072524", "GO:1901362", "GO:1901566")
query_1	FALSE	1	82	211	4	0.0189573	0.0487805	GO:0072527	GO:BP	pyrimidine-containing compound metabolic process	21100	20319	c("GO:0034641", "GO:0046483", "GO:1901360", "GO:1901564")
query_1	FALSE	1	37	211	1	0.00473934	0.027027	GO:0072528	GO:BP	pyrimidine-containing compound biosynthetic process	21100	20320	c("GO:0018130", "GO:0044271", "GO:0072527", "GO:1901362", "GO:1901566")
query_1	FALSE	1	37	211	3	0.014218	0.0810811	GO:0072529	GO:BP	pyrimidine-containing compound catabolic process	21100	20321	c("GO:0044270", "GO:0046700", "GO:0072527", "GO:1901361", "GO:1901565")
query_1	FALSE	1	25	211	2	0.00947867	0.08	GO:0072530	GO:BP	purine-containing compound transmembrane transport	21100	20322	c("GO:0055085", "GO:0071702", "GO:0071705")
query_1	FALSE	1	14	211	1	0.00473934	0.0714286	GO:0072531	GO:BP	pyrimidine-containing compound transmembrane transport	21100	20323	c("GO:0055085", "GO:0071702", "GO:0071705")
query_1	FALSE	1	3	211	1	0.00473934	0.333333	GO:0072535	GO:BP	tumor necrosis factor (ligand) superfamily member 11 production	21100	20324	GO:0071706
query_1	FALSE	1	40	211	1	0.00473934	0.025	GO:0072538	GO:BP	T-helper 17 type immune response	21100	20326	GO:0002460
query_1	FALSE	1	28	211	1	0.00473934	0.0357143	GO:0072539	GO:BP	T-helper 17 cell differentiation	21100	20327	c("GO:0042093", "GO:0072538")
query_1	FALSE	1	13	211	1	0.00473934	0.0769231	GO:0072540	GO:BP	T-helper 17 cell lineage commitment	21100	20328	c("GO:0002295", "GO:0072539")
query_1	FALSE	1	16	211	1	0.00473934	0.0625	GO:0072567	GO:BP	chemokine (C-X-C motif) ligand 2 production	21100	20335	GO:0032602
query_1	FALSE	1	2	211	1	0.00473934	0.5	GO:0072573	GO:BP	tolerance induction to lipopolysaccharide	21100	20336	c("GO:0002507", "GO:0031665", "GO:0071222")
query_1	FALSE	1	24	211	1	0.00473934	0.0416667	GO:0072574	GO:BP	hepatocyte proliferation	21100	20337	GO:0072575
query_1	FALSE	1	413	211	5	0.0236967	0.0121065	GO:0072521	GO:BP	purine-containing compound metabolic process	21100	20313	c("GO:0006725", "GO:0034641", "GO:0046483", "GO:1901360", "GO:1901564")
query_1	FALSE	1	24	211	1	0.00473934	0.0416667	GO:0072575	GO:BP	epithelial cell proliferation involved in liver morphogenesis	21100	20338	c("GO:0050673", "GO:0072576")
query_1	FALSE	1	56	211	4	0.0189573	0.0714286	GO:0072577	GO:BP	endothelial cell apoptotic process	21100	20340	GO:1904019
query_1	FALSE	1	11	211	1	0.00473934	0.0909091	GO:0072584	GO:BP	caveolin-mediated endocytosis	21100	20346	GO:0006897
query_1	FALSE	1	657	211	8	0.0379147	0.0121766	GO:0072594	GO:BP	establishment of protein localization to organelle	21100	20349	c("GO:0033365", "GO:0045184")
query_1	FALSE	1	125	211	2	0.00947867	0.016	GO:0072655	GO:BP	establishment of protein localization to mitochondrion	21100	20367	c("GO:0070585", "GO:0072594")
query_1	FALSE	1	799	211	6	0.028436	0.00750939	GO:0072657	GO:BP	protein localization to membrane	21100	20369	c("GO:0034613", "GO:0051668")
query_1	FALSE	1	284	211	2	0.00947867	0.00704225	GO:0072659	GO:BP	protein localization to plasma membrane	21100	20371	c("GO:0072657", "GO:1990778")
query_1	FALSE	1	68	211	2	0.00947867	0.0294118	GO:0072665	GO:BP	protein localization to vacuole	21100	20376	GO:0033365
query_1	FALSE	1	49	211	1	0.00473934	0.0204082	GO:0072666	GO:BP	establishment of protein localization to vacuole	21100	20377	c("GO:0072594", "GO:0072665")
query_1	FALSE	1	14	211	1	0.00473934	0.0714286	GO:0072672	GO:BP	neutrophil extravasation	21100	20382	c("GO:0045123", "GO:1990266")
query_1	FALSE	1	17	211	1	0.00473934	0.0588235	GO:0072673	GO:BP	lamellipodium morphogenesis	21100	20383	c("GO:0097581", "GO:0120039")
query_1	FALSE	1	13	211	1	0.00473934	0.0769231	GO:0072683	GO:BP	T cell extravasation	21100	20393	c("GO:0045123", "GO:0072678")
query_1	FALSE	1	54	211	1	0.00473934	0.0185185	GO:0072698	GO:BP	protein localization to microtubule cytoskeleton	21100	20404	GO:0044380
query_1	FALSE	1	5812	211	80	0.379147	0.0137646	GO:0080090	GO:BP	regulation of primary metabolic process	21100	20855	c("GO:0019222", "GO:0044238")
query_1	FALSE	1	25	211	1	0.00473934	0.04	GO:0072576	GO:BP	liver morphogenesis	21100	20339	c("GO:0001889", "GO:0022612")
query_1	FALSE	1	168	211	1	0.00473934	0.00595238	GO:0071466	GO:BP	cellular response to xenobiotic stimulus	21100	19487	c("GO:0009410", "GO:0070887")
query_1	FALSE	1	157	211	2	0.00947867	0.0127389	GO:0071456	GO:BP	cellular response to hypoxia	21100	19478	c("GO:0001666", "GO:0033554", "GO:0036294")
query_1	FALSE	1	181	211	2	0.00947867	0.0110497	GO:0071453	GO:BP	cellular response to oxygen levels	21100	19475	c("GO:0070482", "GO:0070887")
query_1	FALSE	1	3	211	1	0.00473934	0.333333	GO:0070425	GO:BP	negative regulation of nucleotide-binding oligomerization domain containing signaling pathway	21100	18853	c("GO:0070423", "GO:0070424", "GO:1902532")
query_1	FALSE	1	6	211	1	0.00473934	0.166667	GO:0070426	GO:BP	positive regulation of nucleotide-binding oligomerization domain containing signaling pathway	21100	18854	c("GO:0062208", "GO:0070423", "GO:0070424", "GO:1902533")
query_1	FALSE	1	6	211	1	0.00473934	0.166667	GO:0070427	GO:BP	nucleotide-binding oligomerization domain containing 1 signaling pathway	21100	18855	GO:0070423
query_1	FALSE	1	4	211	1	0.00473934	0.25	GO:0070428	GO:BP	regulation of nucleotide-binding oligomerization domain containing 1 signaling pathway	21100	18856	c("GO:0070424", "GO:0070427")
query_1	FALSE	1	1	211	1	0.00473934	1	GO:0070429	GO:BP	negative regulation of nucleotide-binding oligomerization domain containing 1 signaling pathway	21100	18857	c("GO:0070425", "GO:0070427", "GO:0070428")
query_1	FALSE	1	16	211	2	0.00947867	0.125	GO:0070431	GO:BP	nucleotide-binding oligomerization domain containing 2 signaling pathway	21100	18859	GO:0070423
query_1	FALSE	1	8	211	2	0.00947867	0.25	GO:0070432	GO:BP	regulation of nucleotide-binding oligomerization domain containing 2 signaling pathway	21100	18860	c("GO:0070424", "GO:0070431")
query_1	FALSE	1	3	211	1	0.00473934	0.333333	GO:0070433	GO:BP	negative regulation of nucleotide-binding oligomerization domain containing 2 signaling pathway	21100	18861	c("GO:0070425", "GO:0070431", "GO:0070432")
query_1	FALSE	1	5	211	1	0.00473934	0.2	GO:0070434	GO:BP	positive regulation of nucleotide-binding oligomerization domain containing 2 signaling pathway	21100	18862	c("GO:0070426", "GO:0070431", "GO:0070432")
query_1	FALSE	1	7	211	1	0.00473934	0.142857	GO:0070444	GO:BP	oligodendrocyte progenitor proliferation	21100	18863	c("GO:0042063", "GO:0061351")
query_1	FALSE	1	7	211	1	0.00473934	0.142857	GO:0070445	GO:BP	regulation of oligodendrocyte progenitor proliferation	21100	18864	c("GO:0070444", "GO:2000177")
query_1	FALSE	1	3	211	1	0.00473934	0.333333	GO:0070447	GO:BP	positive regulation of oligodendrocyte progenitor proliferation	21100	18866	c("GO:0014015", "GO:0070444", "GO:0070445", "GO:2000179")
query_1	FALSE	1	339	211	6	0.028436	0.0176991	GO:0070482	GO:BP	response to oxygen levels	21100	18886	GO:0009628
query_1	FALSE	1	12	211	1	0.00473934	0.0833333	GO:0070493	GO:BP	thrombin-activated receptor signaling pathway	21100	18895	GO:0007186
query_1	FALSE	1	48	211	2	0.00947867	0.0416667	GO:0070498	GO:BP	interleukin-1-mediated signaling pathway	21100	18899	c("GO:0019221", "GO:0071347")
query_1	FALSE	1	155	211	1	0.00473934	0.00645161	GO:0070507	GO:BP	regulation of microtubule cytoskeleton organization	21100	18906	c("GO:0000226", "GO:0032886", "GO:0051493")
query_1	FALSE	1	56	211	2	0.00947867	0.0357143	GO:0070509	GO:BP	calcium ion import	21100	18908	GO:0006816
query_1	FALSE	1	70	211	5	0.0236967	0.0714286	GO:0070527	GO:BP	platelet aggregation	21100	18913	c("GO:0030168", "GO:0034109")
query_1	FALSE	1	32	211	2	0.00947867	0.0625	GO:0070528	GO:BP	protein kinase C signaling	21100	18914	GO:0035556
query_1	FALSE	1	36	211	1	0.00473934	0.0277778	GO:0070536	GO:BP	protein K63-linked deubiquitination	21100	18917	GO:0016579
query_1	FALSE	1	2	211	1	0.00473934	0.5	GO:0070560	GO:BP	protein secretion by platelet	21100	18926	c("GO:0002576", "GO:0009306", "GO:0051649", "GO:0140029")
query_1	FALSE	1	11	211	1	0.00473934	0.0909091	GO:0070561	GO:BP	vitamin D receptor signaling pathway	21100	18927	c("GO:0030522", "GO:0071305")
query_1	FALSE	1	30	211	1	0.00473934	0.0333333	GO:0070570	GO:BP	regulation of neuron projection regeneration	21100	18931	c("GO:0010975", "GO:0031102", "GO:0050793", "GO:0080135")
query_1	FALSE	1	130	211	2	0.00947867	0.0153846	GO:0070585	GO:BP	protein localization to mitochondrion	21100	18941	GO:0033365
query_1	FALSE	1	204	211	3	0.014218	0.0147059	GO:0070646	GO:BP	protein modification by small protein removal	21100	18982	c("GO:0006508", "GO:0070647")
query_1	FALSE	1	1067	211	6	0.028436	0.00562324	GO:0070647	GO:BP	protein modification by small protein conjugation or removal	21100	18983	GO:0006464
query_1	FALSE	1	5	211	1	0.00473934	0.2	GO:0070662	GO:BP	mast cell proliferation	21100	18995	GO:0070661
query_1	FALSE	1	13	211	2	0.00947867	0.153846	GO:0070424	GO:BP	regulation of nucleotide-binding oligomerization domain containing signaling pathway	21100	18852	c("GO:0062207", "GO:0070423", "GO:1902531")
query_1	FALSE	1	25	211	2	0.00947867	0.08	GO:0070423	GO:BP	nucleotide-binding oligomerization domain containing signaling pathway	21100	18851	c("GO:0002753", "GO:0035872")
query_1	FALSE	1	10	211	1	0.00473934	0.1	GO:0070391	GO:BP	response to lipoteichoic acid	21100	18833	c("GO:0002237", "GO:1901700")
query_1	FALSE	1	9	211	2	0.00947867	0.222222	GO:0070383	GO:BP	DNA cytosine deamination	21100	18831	GO:0045006
query_1	FALSE	1	3197	211	26	0.123223	0.00813262	GO:0065003	GO:BP	protein-containing complex assembly	21100	18609	c("GO:0022607", "GO:0043933")
query_1	FALSE	1	233	211	2	0.00947867	0.00858369	GO:0065004	GO:BP	protein-DNA complex assembly	21100	18610	c("GO:0065003", "GO:0071824")
query_1	FALSE	1	248	211	1	0.00473934	0.00403226	GO:0070085	GO:BP	glycosylation	21100	18632	GO:0008152
query_1	FALSE	1	5	211	1	0.00473934	0.2	GO:0070086	GO:BP	ubiquitin-dependent endocytosis	21100	18633	c("GO:0006897", "GO:0015031", "GO:0072594", "GO:0098657")
query_1	FALSE	1	10	211	1	0.00473934	0.1	GO:0070099	GO:BP	regulation of chemokine-mediated signaling pathway	21100	18640	c("GO:0001959", "GO:0070098")
query_1	FALSE	1	7	211	1	0.00473934	0.142857	GO:0070100	GO:BP	negative regulation of chemokine-mediated signaling pathway	21100	18641	c("GO:0001960", "GO:0070098", "GO:0070099")
query_1	FALSE	1	99	211	2	0.00947867	0.020202	GO:0070167	GO:BP	regulation of biomineral tissue development	21100	18689	c("GO:0031214", "GO:0110149", "GO:2000026")
query_1	FALSE	1	28	211	2	0.00947867	0.0714286	GO:0070168	GO:BP	negative regulation of biomineral tissue development	21100	18690	c("GO:0031214", "GO:0051093", "GO:0051241", "GO:0070167", "GO:0110150")
query_1	FALSE	1	12	211	2	0.00947867	0.166667	GO:0070189	GO:BP	kynurenine metabolic process	21100	18704	c("GO:0042180", "GO:0042537", "GO:1901605")
query_1	FALSE	1	523	211	7	0.0331754	0.0133843	GO:0070201	GO:BP	regulation of establishment of protein localization	21100	18713	c("GO:0032880", "GO:0045184")
query_1	FALSE	1	18	211	1	0.00473934	0.0555556	GO:0070206	GO:BP	protein trimerization	21100	18716	GO:0051259
query_1	FALSE	1	16	211	1	0.00473934	0.0625	GO:0070207	GO:BP	protein homotrimerization	21100	18717	c("GO:0051260", "GO:0070206")
query_1	FALSE	1	32	211	3	0.014218	0.09375	GO:0070229	GO:BP	negative regulation of lymphocyte apoptotic process	21100	18730	c("GO:0070227", "GO:0070228", "GO:2000107")
query_1	FALSE	1	4	211	1	0.00473934	0.25	GO:0070666	GO:BP	regulation of mast cell proliferation	21100	18999	c("GO:0070662", "GO:0070663")
query_1	FALSE	1	18	211	3	0.014218	0.166667	GO:0070230	GO:BP	positive regulation of lymphocyte apoptotic process	21100	18731	c("GO:0070227", "GO:0070228", "GO:2000108")
query_1	FALSE	1	12	211	1	0.00473934	0.0833333	GO:0070254	GO:BP	mucus secretion	21100	18753	c("GO:0007589", "GO:0032941")
query_1	FALSE	1	8	211	1	0.00473934	0.125	GO:0070255	GO:BP	regulation of mucus secretion	21100	18754	c("GO:0050878", "GO:0051046", "GO:0051239", "GO:0070254")
query_1	FALSE	1	5	211	1	0.00473934	0.2	GO:0070257	GO:BP	positive regulation of mucus secretion	21100	18756	c("GO:0051047", "GO:0051240", "GO:0070254", "GO:0070255")
query_1	FALSE	1	57	211	2	0.00947867	0.0350877	GO:0070265	GO:BP	necrotic cell death	21100	18758	GO:0008219
query_1	FALSE	1	35	211	2	0.00947867	0.0571429	GO:0070266	GO:BP	necroptotic process	21100	18759	GO:0097300
query_1	FALSE	1	22	211	2	0.00947867	0.0909091	GO:0070269	GO:BP	pyroptosis	21100	18762	GO:0012501
query_1	FALSE	1	14	211	1	0.00473934	0.0714286	GO:0070278	GO:BP	extracellular matrix constituent secretion	21100	18769	c("GO:0030198", "GO:0032940")
query_1	FALSE	1	86	211	4	0.0189573	0.0465116	GO:0070301	GO:BP	cellular response to hydrogen peroxide	21100	18781	c("GO:0034614", "GO:0042542")
query_1	FALSE	1	195	211	8	0.0379147	0.0410256	GO:0070302	GO:BP	regulation of stress-activated protein kinase signaling cascade	21100	18782	c("GO:0031098", "GO:0080135", "GO:1902531")
query_1	FALSE	1	49	211	1	0.00473934	0.0204082	GO:0070303	GO:BP	negative regulation of stress-activated protein kinase signaling cascade	21100	18783	c("GO:0031098", "GO:0070302", "GO:1902532")
query_1	FALSE	1	130	211	4	0.0189573	0.0307692	GO:0070304	GO:BP	positive regulation of stress-activated protein kinase signaling cascade	21100	18784	c("GO:0031098", "GO:0070302", "GO:1902533")
query_1	FALSE	1	6	211	1	0.00473934	0.166667	GO:0070339	GO:BP	response to bacterial lipopeptide	21100	18801	GO:0032493
query_1	FALSE	1	72	211	5	0.0236967	0.0694444	GO:0070373	GO:BP	negative regulation of ERK1 and ERK2 cascade	21100	18825	c("GO:0043409", "GO:0070371", "GO:0070372")
query_1	FALSE	1	21	211	3	0.014218	0.142857	GO:0070233	GO:BP	negative regulation of T cell apoptotic process	21100	18734	c("GO:0070229", "GO:0070231", "GO:0070232")
query_1	FALSE	1	3	211	1	0.00473934	0.333333	GO:0070667	GO:BP	negative regulation of mast cell proliferation	21100	19000	c("GO:0070662", "GO:0070664", "GO:0070666")
query_1	FALSE	1	2	211	1	0.00473934	0.5	GO:0070668	GO:BP	positive regulation of mast cell proliferation	21100	19001	c("GO:0070662", "GO:0070665", "GO:0070666")
query_1	FALSE	1	8	211	1	0.00473934	0.125	GO:0070669	GO:BP	response to interleukin-2	21100	19002	GO:0034097
query_1	FALSE	1	36	211	2	0.00947867	0.0555556	GO:0071276	GO:BP	cellular response to cadmium ion	21100	19307	c("GO:0046686", "GO:0071248")
query_1	FALSE	1	85	211	2	0.00947867	0.0235294	GO:0071277	GO:BP	cellular response to calcium ion	21100	19308	c("GO:0051592", "GO:0071248")
query_1	FALSE	1	31	211	2	0.00947867	0.0645161	GO:0071295	GO:BP	cellular response to vitamin	21100	19326	c("GO:0031670", "GO:0033273")
query_1	FALSE	1	68	211	1	0.00473934	0.0147059	GO:0071300	GO:BP	cellular response to retinoic acid	21100	19331	c("GO:0032526", "GO:0071396", "GO:1901701")
query_1	FALSE	1	21	211	2	0.00947867	0.0952381	GO:0071305	GO:BP	cellular response to vitamin D	21100	19336	c("GO:0033280", "GO:0071295", "GO:0071396", "GO:0071407", "GO:1901701")
query_1	FALSE	1	55	211	2	0.00947867	0.0363636	GO:0071320	GO:BP	cellular response to cAMP	21100	19351	c("GO:0051591", "GO:0071407", "GO:0071417", "GO:1901701")
query_1	FALSE	1	143	211	2	0.00947867	0.013986	GO:0071322	GO:BP	cellular response to carbohydrate stimulus	21100	19353	c("GO:0009743", "GO:0071310", "GO:1901701")
query_1	FALSE	1	133	211	1	0.00473934	0.0075188	GO:0071326	GO:BP	cellular response to monosaccharide stimulus	21100	19357	c("GO:0034284", "GO:0071322")
query_1	FALSE	1	131	211	1	0.00473934	0.00763359	GO:0071331	GO:BP	cellular response to hexose stimulus	21100	19362	c("GO:0009746", "GO:0071326")
query_1	FALSE	1	129	211	1	0.00473934	0.00775194	GO:0071333	GO:BP	cellular response to glucose stimulus	21100	19364	c("GO:0001678", "GO:0009749", "GO:0071331")
query_1	FALSE	1	6	211	1	0.00473934	0.166667	GO:0071349	GO:BP	cellular response to interleukin-12	21100	19378	c("GO:0070671", "GO:0071345")
query_1	FALSE	1	6	211	2	0.00947867	0.333333	GO:0071350	GO:BP	cellular response to interleukin-15	21100	19379	c("GO:0070672", "GO:0071345")
query_1	FALSE	1	9	211	1	0.00473934	0.111111	GO:0071351	GO:BP	cellular response to interleukin-18	21100	19380	c("GO:0070673", "GO:0071345")
query_1	FALSE	1	73	211	4	0.0189573	0.0547945	GO:0071260	GO:BP	cellular response to mechanical stimulus	21100	19292	c("GO:0009612", "GO:0071214", "GO:0071496")
query_1	FALSE	1	6	211	1	0.00473934	0.166667	GO:0071352	GO:BP	cellular response to interleukin-2	21100	19381	c("GO:0070669", "GO:0071345")
query_1	FALSE	1	64	211	3	0.014218	0.046875	GO:0071357	GO:BP	cellular response to type I interferon	21100	19386	c("GO:0034340", "GO:0071345")
query_1	FALSE	1	13	211	1	0.00473934	0.0769231	GO:0071361	GO:BP	cellular response to ethanol	21100	19390	c("GO:0045471", "GO:0097306")
query_1	FALSE	1	655	211	10	0.0473934	0.0152672	GO:0071363	GO:BP	cellular response to growth factor stimulus	21100	19392	c("GO:0070848", "GO:0071310")
query_1	FALSE	1	288	211	4	0.0189573	0.0138889	GO:0071375	GO:BP	cellular response to peptide hormone stimulus	21100	19404	c("GO:0032870", "GO:0043434", "GO:1901653")
query_1	FALSE	1	25	211	1	0.00473934	0.04	GO:0071378	GO:BP	cellular response to growth hormone stimulus	21100	19407	c("GO:0060416", "GO:0071375")
query_1	FALSE	1	15	211	1	0.00473934	0.0666667	GO:0071397	GO:BP	cellular response to cholesterol	21100	19426	c("GO:0036315", "GO:0070723", "GO:0097306")
query_1	FALSE	1	32	211	1	0.00473934	0.03125	GO:0071402	GO:BP	cellular response to lipoprotein particle stimulus	21100	19431	GO:0051716
query_1	FALSE	1	167	211	2	0.00947867	0.011976	GO:1902904	GO:BP	negative regulation of supramolecular fiber organization	21100	26027	c("GO:0051129", "GO:0097435", "GO:1902903")
query_1	FALSE	1	569	211	9	0.042654	0.0158172	GO:0071407	GO:BP	cellular response to organic cyclic compound	21100	19436	c("GO:0014070", "GO:0071310")
query_1	FALSE	1	626	211	8	0.0379147	0.0127796	GO:0071417	GO:BP	cellular response to organonitrogen compound	21100	19446	c("GO:0010243", "GO:0071310", "GO:0071495", "GO:1901699")
query_1	FALSE	1	25	211	1	0.00473934	0.04	GO:0071425	GO:BP	hematopoietic stem cell proliferation	21100	19453	c("GO:0030097", "GO:0072089")
query_1	FALSE	1	21	211	2	0.00947867	0.0952381	GO:0071450	GO:BP	cellular response to oxygen radical	21100	19472	c("GO:0000305", "GO:0034614")
query_1	FALSE	1	21	211	2	0.00947867	0.0952381	GO:0071451	GO:BP	cellular response to superoxide	21100	19473	c("GO:0000303", "GO:0071450")
query_1	FALSE	1	31	211	1	0.00473934	0.0322581	GO:0071353	GO:BP	cellular response to interleukin-4	21100	19382	c("GO:0070670", "GO:0071345")
query_1	FALSE	1	45	211	2	0.00947867	0.0444444	GO:0062208	GO:BP	positive regulation of pattern recognition receptor signaling pathway	21100	18586	c("GO:0002221", "GO:0009967", "GO:0062207")
query_1	FALSE	1	191	211	4	0.0189573	0.0209424	GO:0071248	GO:BP	cellular response to metal ion	21100	19283	c("GO:0010038", "GO:0071241")
query_1	FALSE	1	79	211	1	0.00473934	0.0126582	GO:0071230	GO:BP	cellular response to amino acid stimulus	21100	19265	c("GO:0043200", "GO:0071229", "GO:0071417", "GO:1901701")
query_1	FALSE	1	33	211	1	0.00473934	0.030303	GO:0070670	GO:BP	response to interleukin-4	21100	19003	GO:0034097
query_1	FALSE	1	7	211	1	0.00473934	0.142857	GO:0070671	GO:BP	response to interleukin-12	21100	19004	GO:0034097
query_1	FALSE	1	8	211	2	0.00947867	0.25	GO:0070672	GO:BP	response to interleukin-15	21100	19005	GO:0034097
query_1	FALSE	1	11	211	1	0.00473934	0.0909091	GO:0070673	GO:BP	response to interleukin-18	21100	19006	GO:0034097
query_1	FALSE	1	24	211	1	0.00473934	0.0416667	GO:0070723	GO:BP	response to cholesterol	21100	19026	c("GO:0036314", "GO:0097305")
query_1	FALSE	1	1922	211	19	0.0900474	0.00988554	GO:0070727	GO:BP	cellular macromolecule localization	21100	19028	c("GO:0033036", "GO:0051641")
query_1	FALSE	1	9	211	1	0.00473934	0.111111	GO:0070782	GO:BP	phosphatidylserine exposure on apoptotic cell surface	21100	19046	c("GO:0017121", "GO:0097194")
query_1	FALSE	1	8	211	1	0.00473934	0.125	GO:0070837	GO:BP	dehydroascorbic acid transport	21100	19089	c("GO:0015711", "GO:0051180")
query_1	FALSE	1	685	211	13	0.0616114	0.0189781	GO:0070848	GO:BP	response to growth factor	21100	19096	GO:0010033
query_1	FALSE	1	46	211	1	0.00473934	0.0217391	GO:0070849	GO:BP	response to epidermal growth factor	21100	19097	c("GO:0009719", "GO:0070848")
query_1	FALSE	1	34	211	1	0.00473934	0.0294118	GO:0070884	GO:BP	regulation of calcineurin-NFAT signaling cascade	21100	19112	c("GO:0033173", "GO:0106056")
query_1	FALSE	1	52	211	1	0.00473934	0.0192308	GO:0070918	GO:BP	primary sncRNA processing	21100	19132	c("GO:0031047", "GO:0034470")
query_1	FALSE	1	20	211	1	0.00473934	0.05	GO:0070920	GO:BP	regulation of production of small RNA involved in gene silencing by RNA	21100	19134	c("GO:0051252", "GO:0060966", "GO:0070918")
query_1	FALSE	1	221	211	4	0.0189573	0.0180995	GO:0071241	GO:BP	cellular response to inorganic substance	21100	19276	c("GO:0010035", "GO:0070887")
query_1	FALSE	1	900	211	4	0.0189573	0.00444444	GO:0070925	GO:BP	organelle assembly	21100	19137	c("GO:0006996", "GO:0022607")
query_1	FALSE	1	67	211	1	0.00473934	0.0149254	GO:0070936	GO:BP	protein K48-linked ubiquitination	21100	19147	GO:0000209
query_1	FALSE	1	29	211	1	0.00473934	0.0344828	GO:0070977	GO:BP	bone maturation	21100	19177	c("GO:0048799", "GO:0060348")
query_1	FALSE	1	75	211	2	0.00947867	0.0266667	GO:0070988	GO:BP	demethylation	21100	19186	GO:0008152
query_1	FALSE	1	353	211	11	0.0521327	0.0311615	GO:0070997	GO:BP	neuron death	21100	19190	GO:0008219
query_1	FALSE	1	3	211	1	0.00473934	0.333333	GO:0071000	GO:BP	response to magnetism	21100	19193	GO:0009628
query_1	FALSE	1	19	211	1	0.00473934	0.0526316	GO:0071071	GO:BP	regulation of phospholipid biosynthetic process	21100	19220	c("GO:0008654", "GO:0031326", "GO:0046890", "GO:1903725")
query_1	FALSE	1	6	211	1	0.00473934	0.166667	GO:0071072	GO:BP	negative regulation of phospholipid biosynthetic process	21100	19221	c("GO:0008654", "GO:0031327", "GO:0051055", "GO:0071071", "GO:1903726")
query_1	FALSE	1	37	211	1	0.00473934	0.027027	GO:0071108	GO:BP	protein K48-linked deubiquitination	21100	19229	GO:0016579
query_1	FALSE	1	328	211	4	0.0189573	0.0121951	GO:0071214	GO:BP	cellular response to abiotic stimulus	21100	19249	c("GO:0009628", "GO:0104004")
query_1	FALSE	1	6	211	1	0.00473934	0.166667	GO:0071220	GO:BP	cellular response to bacterial lipoprotein	21100	19255	c("GO:0032493", "GO:0071219")
query_1	FALSE	1	6	211	1	0.00473934	0.166667	GO:0071221	GO:BP	cellular response to bacterial lipopeptide	21100	19256	c("GO:0070339", "GO:0071220")
query_1	FALSE	1	10	211	1	0.00473934	0.1	GO:0071223	GO:BP	cellular response to lipoteichoic acid	21100	19258	c("GO:0070391", "GO:0071219", "GO:1901701")
query_1	FALSE	1	87	211	1	0.00473934	0.0114943	GO:0071229	GO:BP	cellular response to acid chemical	21100	19264	c("GO:0001101", "GO:0070887")
query_1	FALSE	1	25	211	1	0.00473934	0.04	GO:0070935	GO:BP	3'-UTR-mediated mRNA stabilization	21100	19146	GO:0048255
query_1	FALSE	1	177	211	3	0.014218	0.0169492	GO:1902905	GO:BP	positive regulation of supramolecular fiber organization	21100	26028	c("GO:0051130", "GO:0097435", "GO:1902903")
query_1	FALSE	1	12	211	1	0.00473934	0.0833333	GO:1905245	GO:BP	regulation of aspartic-type peptidase activity	21100	28148	GO:0052547
query_1	FALSE	1	13	211	1	0.00473934	0.0769231	GO:1902931	GO:BP	negative regulation of alcohol biosynthetic process	21100	26051	c("GO:0009890", "GO:0046165", "GO:0062014", "GO:1902930")
query_1	FALSE	1	47	211	1	0.00473934	0.0212766	GO:1902930	GO:BP	regulation of alcohol biosynthetic process	21100	26050	c("GO:0009889", "GO:0046165", "GO:0062012")
query_1	FALSE	1	1	211	1	0.00473934	1	GO:1905917	GO:BP	positive regulation of cell differentiation involved in phenotypic switching	21100	28767	c("GO:0045597", "GO:0090679", "GO:1905915")
query_1	FALSE	1	3	211	1	0.00473934	0.333333	GO:1905930	GO:BP	regulation of vascular associated smooth muscle cell differentiation involved in phenotypic switching	21100	28780	c("GO:1905063", "GO:1905420", "GO:1905915")
query_1	FALSE	1	1	211	1	0.00473934	1	GO:1905932	GO:BP	positive regulation of vascular associated smooth muscle cell differentiation involved in phenotypic switching	21100	28782	c("GO:1905065", "GO:1905420", "GO:1905917", "GO:1905930")
query_1	FALSE	1	164	211	1	0.00473934	0.00609756	GO:1905952	GO:BP	regulation of lipid localization	21100	28800	c("GO:0010876", "GO:0032879")
query_1	FALSE	1	108	211	1	0.00473934	0.00925926	GO:1905954	GO:BP	positive regulation of lipid localization	21100	28802	c("GO:0010876", "GO:0048518", "GO:1905952")
query_1	FALSE	1	5	211	1	0.00473934	0.2	GO:1990051	GO:BP	activation of protein kinase C activity	21100	28824	GO:0032147
query_1	FALSE	1	46	211	2	0.00947867	0.0434783	GO:1990089	GO:BP	response to nerve growth factor	21100	28839	c("GO:0009719", "GO:0070848")
query_1	FALSE	1	44	211	2	0.00947867	0.0454545	GO:1990090	GO:BP	cellular response to nerve growth factor stimulus	21100	28840	c("GO:0071363", "GO:0071495", "GO:1990089")
query_1	FALSE	1	173	211	2	0.00947867	0.0115607	GO:1990138	GO:BP	neuron projection extension	21100	28860	c("GO:0048588", "GO:0048812", "GO:0060560")
query_1	FALSE	1	4	211	1	0.00473934	0.25	GO:1990168	GO:BP	protein K33-linked deubiquitination	21100	28873	GO:0016579
query_1	FALSE	1	20	211	1	0.00473934	0.05	GO:1990182	GO:BP	exosomal secretion	21100	28882	c("GO:0006887", "GO:0051650", "GO:0097734")
query_1	FALSE	1	110	211	3	0.014218	0.0272727	GO:1990748	GO:BP	cellular detoxification	21100	29098	c("GO:0009987", "GO:0097237", "GO:0098754")
query_1	FALSE	1	29	211	1	0.00473934	0.0344828	GO:1990776	GO:BP	response to angiotensin	21100	29113	GO:0043434
query_1	FALSE	1	336	211	2	0.00947867	0.00595238	GO:1990778	GO:BP	protein localization to cell periphery	21100	29114	GO:0034613
query_1	FALSE	1	3	211	1	0.00473934	0.333333	GO:1905915	GO:BP	regulation of cell differentiation involved in phenotypic switching	21100	28765	c("GO:0045595", "GO:0090679")
query_1	FALSE	1	100	211	1	0.00473934	0.01	GO:1990823	GO:BP	response to leukemia inhibitory factor	21100	29140	GO:0034097
query_1	FALSE	1	160	211	4	0.0189573	0.025	GO:1990845	GO:BP	adaptive thermogenesis	21100	29150	GO:0008152
query_1	FALSE	1	78	211	5	0.0236967	0.0641026	GO:1990849	GO:BP	vacuolar localization	21100	29153	GO:0051640
query_1	FALSE	1	59	211	1	0.00473934	0.0169492	GO:1990874	GO:BP	vascular associated smooth muscle cell proliferation	21100	29168	GO:0048659
query_1	FALSE	1	49	211	1	0.00473934	0.0204082	GO:1990928	GO:BP	response to amino acid starvation	21100	29191	GO:0042594
query_1	FALSE	1	40	211	1	0.00473934	0.025	GO:2000008	GO:BP	regulation of protein localization to cell surface	21100	29234	c("GO:0032880", "GO:0034394", "GO:0060341")
query_1	FALSE	1	18	211	1	0.00473934	0.0555556	GO:2000010	GO:BP	positive regulation of protein localization to cell surface	21100	29236	c("GO:0034394", "GO:0048522", "GO:1903829", "GO:2000008")
query_1	FALSE	1	151	211	2	0.00947867	0.013245	GO:2000027	GO:BP	regulation of animal organ morphogenesis	21100	29252	c("GO:0009887", "GO:0022603")
query_1	FALSE	1	140	211	3	0.014218	0.0214286	GO:2000045	GO:BP	regulation of G1/S transition of mitotic cell cycle	21100	29270	c("GO:0000082", "GO:1901990", "GO:1902806")
query_1	FALSE	1	171	211	1	0.00473934	0.00584795	GO:2000058	GO:BP	regulation of ubiquitin-dependent protein catabolic process	21100	29283	c("GO:0006511", "GO:1903050")
query_1	FALSE	1	110	211	1	0.00473934	0.00909091	GO:2000060	GO:BP	positive regulation of ubiquitin-dependent protein catabolic process	21100	29285	c("GO:0006511", "GO:1903052", "GO:2000058")
query_1	FALSE	1	483	211	6	0.028436	0.0124224	GO:2000112	GO:BP	regulation of cellular macromolecule biosynthetic process	21100	29336	c("GO:0010556", "GO:0031326", "GO:0034645")
query_1	FALSE	1	196	211	3	0.014218	0.0153061	GO:2000113	GO:BP	negative regulation of cellular macromolecule biosynthetic process	21100	29337	c("GO:0010558", "GO:0031327", "GO:0034645", "GO:2000112")
query_1	FALSE	1	228	211	6	0.028436	0.0263158	GO:2000116	GO:BP	regulation of cysteine-type endopeptidase activity	21100	29340	GO:0052548
query_1	FALSE	1	83	211	2	0.00947867	0.0240964	GO:2000117	GO:BP	negative regulation of cysteine-type endopeptidase activity	21100	29341	c("GO:0010951", "GO:2000116")
query_1	FALSE	1	99	211	1	0.00473934	0.010101	GO:1990830	GO:BP	cellular response to leukemia inhibitory factor	21100	29142	c("GO:0071345", "GO:1990823")
query_1	FALSE	1	1	211	1	0.00473934	1	GO:1905782	GO:BP	positive regulation of phosphatidylserine exposure on apoptotic cell surface	21100	28634	c("GO:0061092", "GO:0070782", "GO:1905780")
query_1	FALSE	1	1	211	1	0.00473934	1	GO:1905780	GO:BP	regulation of phosphatidylserine exposure on apoptotic cell surface	21100	28632	c("GO:0061091", "GO:0070782", "GO:1903729")
query_1	FALSE	1	51	211	1	0.00473934	0.0196078	GO:1905710	GO:BP	positive regulation of membrane permeability	21100	28585	GO:0090559
query_1	FALSE	1	29	211	1	0.00473934	0.0344828	GO:1904994	GO:BP	regulation of leukocyte adhesion to vascular endothelial cell	21100	27917	c("GO:0061756", "GO:1903037")
query_1	FALSE	1	22	211	1	0.00473934	0.0454545	GO:1904996	GO:BP	positive regulation of leukocyte adhesion to vascular endothelial cell	21100	27919	c("GO:0061756", "GO:1903039", "GO:1904994")
query_1	FALSE	1	1	211	1	0.00473934	1	GO:1905062	GO:BP	positive regulation of cardioblast proliferation	21100	27977	c("GO:0003263", "GO:0003264", "GO:2000138")
query_1	FALSE	1	15	211	1	0.00473934	0.0666667	GO:1905063	GO:BP	regulation of vascular associated smooth muscle cell differentiation	21100	27978	c("GO:0035886", "GO:0051150")
query_1	FALSE	1	7	211	1	0.00473934	0.142857	GO:1905065	GO:BP	positive regulation of vascular associated smooth muscle cell differentiation	21100	27980	c("GO:0035886", "GO:0051152", "GO:1905063")
query_1	FALSE	1	571	211	6	0.028436	0.0105079	GO:1905114	GO:BP	cell surface receptor signaling pathway involved in cell-cell signaling	21100	28024	c("GO:0007166", "GO:0007267")
query_1	FALSE	1	16	211	1	0.00473934	0.0625	GO:1905153	GO:BP	regulation of membrane invagination	21100	28060	c("GO:0010324", "GO:0051128")
query_1	FALSE	1	14	211	1	0.00473934	0.0714286	GO:1905155	GO:BP	positive regulation of membrane invagination	21100	28062	c("GO:0010324", "GO:0051130", "GO:1905153")
query_1	FALSE	1	38	211	1	0.00473934	0.0263158	GO:1905168	GO:BP	positive regulation of double-strand break repair via homologous recombination	21100	28075	c("GO:0000724", "GO:0010569", "GO:0045911", "GO:2000781")
query_1	FALSE	1	11	211	1	0.00473934	0.0909091	GO:0051152	GO:BP	positive regulation of smooth muscle cell differentiation	21100	15621	c("GO:0051145", "GO:0051149", "GO:0051150")
query_1	FALSE	1	8	211	1	0.00473934	0.125	GO:1905247	GO:BP	positive regulation of aspartic-type peptidase activity	21100	28150	c("GO:0010952", "GO:1905245")
query_1	FALSE	1	9	211	1	0.00473934	0.111111	GO:1905276	GO:BP	regulation of epithelial tube formation	21100	28179	c("GO:0072175", "GO:1905330", "GO:2000026")
query_1	FALSE	1	9	211	1	0.00473934	0.111111	GO:1905278	GO:BP	positive regulation of epithelial tube formation	21100	28181	c("GO:0051240", "GO:0072175", "GO:1905276", "GO:1905332")
query_1	FALSE	1	8	211	1	0.00473934	0.125	GO:1905288	GO:BP	vascular associated smooth muscle cell apoptotic process	21100	28190	GO:0034390
query_1	FALSE	1	41	211	1	0.00473934	0.0243902	GO:1905314	GO:BP	semi-lunar valve development	21100	28216	GO:0003170
query_1	FALSE	1	65	211	2	0.00947867	0.0307692	GO:1905330	GO:BP	regulation of morphogenesis of an epithelium	21100	28232	c("GO:0002009", "GO:0022603")
query_1	FALSE	1	37	211	1	0.00473934	0.027027	GO:1905332	GO:BP	positive regulation of morphogenesis of an epithelium	21100	28234	c("GO:0002009", "GO:0051094", "GO:1905330")
query_1	FALSE	1	2	211	1	0.00473934	0.5	GO:1905704	GO:BP	positive regulation of inhibitory synapse assembly	21100	28579	c("GO:0051965", "GO:1904862", "GO:1905702")
query_1	FALSE	1	4	211	1	0.00473934	0.25	GO:1905702	GO:BP	regulation of inhibitory synapse assembly	21100	28577	c("GO:0051963", "GO:1904862")
query_1	FALSE	1	5	211	1	0.00473934	0.2	GO:1905563	GO:BP	negative regulation of vascular endothelial cell proliferation	21100	28448	c("GO:0001937", "GO:0101023", "GO:1905562")
query_1	FALSE	1	21	211	1	0.00473934	0.047619	GO:1905562	GO:BP	regulation of vascular endothelial cell proliferation	21100	28447	c("GO:0001936", "GO:0101023")
query_1	FALSE	1	41	211	4	0.0189573	0.097561	GO:1905521	GO:BP	regulation of macrophage migration	21100	28409	c("GO:0002685", "GO:1905517")
query_1	FALSE	1	35	211	1	0.00473934	0.0285714	GO:1905508	GO:BP	protein localization to microtubule organizing center	21100	28396	GO:0072698
query_1	FALSE	1	6	211	1	0.00473934	0.166667	GO:2000121	GO:BP	regulation of removal of superoxide radicals	21100	29345	c("GO:0019430", "GO:0090322", "GO:1900407", "GO:1901031")
query_1	FALSE	1	110	211	3	0.014218	0.0272727	GO:1905477	GO:BP	positive regulation of protein localization to membrane	21100	28367	c("GO:0048522", "GO:0072657", "GO:1903829", "GO:1905475")
query_1	FALSE	1	181	211	4	0.0189573	0.0220994	GO:1905475	GO:BP	regulation of protein localization to membrane	21100	28365	c("GO:0032880", "GO:0060341", "GO:0072657")
query_1	FALSE	1	6	211	1	0.00473934	0.166667	GO:1905461	GO:BP	positive regulation of vascular associated smooth muscle cell apoptotic process	21100	28351	c("GO:0034393", "GO:1905288", "GO:1905459")
query_1	FALSE	1	8	211	1	0.00473934	0.125	GO:1905459	GO:BP	regulation of vascular associated smooth muscle cell apoptotic process	21100	28349	c("GO:0034391", "GO:1905288")
query_1	FALSE	1	4	211	2	0.00947867	0.5	GO:1905451	GO:BP	positive regulation of Fc-gamma receptor signaling pathway involved in phagocytosis	21100	28341	c("GO:0002699", "GO:0038096", "GO:0050766", "GO:0060369", "GO:1905449")
query_1	FALSE	1	6	211	2	0.00947867	0.333333	GO:1905449	GO:BP	regulation of Fc-gamma receptor signaling pathway involved in phagocytosis	21100	28339	c("GO:0002697", "GO:0038096", "GO:0060368")
query_1	FALSE	1	3	211	1	0.00473934	0.333333	GO:1905420	GO:BP	vascular associated smooth muscle cell differentiation involved in phenotypic switching	21100	28310	c("GO:0035886", "GO:0090679")
query_1	FALSE	1	34	211	1	0.00473934	0.0294118	GO:1905476	GO:BP	negative regulation of protein localization to membrane	21100	28366	c("GO:0048523", "GO:0072657", "GO:1903828", "GO:1905475")
query_1	FALSE	1	316	211	6	0.028436	0.0189873	GO:1904951	GO:BP	positive regulation of establishment of protein localization	21100	27875	c("GO:0045184", "GO:0070201", "GO:1903829")
query_1	FALSE	1	74	211	3	0.014218	0.0405405	GO:2000134	GO:BP	negative regulation of G1/S transition of mitotic cell cycle	21100	29358	c("GO:0000082", "GO:1901991", "GO:1902807", "GO:2000045")
query_1	FALSE	1	7	211	1	0.00473934	0.142857	GO:2000138	GO:BP	positive regulation of cell proliferation involved in heart morphogenesis	21100	29362	c("GO:0008284", "GO:0061323", "GO:2000136")
query_1	FALSE	1	10	211	2	0.00947867	0.2	GO:2000425	GO:BP	regulation of apoptotic cell clearance	21100	29644	c("GO:0043277", "GO:0050764")
query_1	FALSE	1	8	211	2	0.00947867	0.25	GO:2000427	GO:BP	positive regulation of apoptotic cell clearance	21100	29646	c("GO:0043277", "GO:0050766", "GO:2000425")
query_1	FALSE	1	2	211	1	0.00473934	0.5	GO:2000471	GO:BP	regulation of hematopoietic stem cell migration	21100	29690	c("GO:0030334", "GO:0035701")
query_1	FALSE	1	2	211	1	0.00473934	0.5	GO:2000473	GO:BP	positive regulation of hematopoietic stem cell migration	21100	29692	c("GO:0030335", "GO:0035701", "GO:2000471")
query_1	FALSE	1	2	211	1	0.00473934	0.5	GO:2000502	GO:BP	negative regulation of natural killer cell chemotaxis	21100	29718	c("GO:0035747", "GO:1901624", "GO:2000501")
query_1	FALSE	1	6	211	2	0.00947867	0.333333	GO:2000503	GO:BP	positive regulation of natural killer cell chemotaxis	21100	29719	c("GO:0035747", "GO:0140131", "GO:2000501")
query_1	FALSE	1	11	211	2	0.00947867	0.181818	GO:2000508	GO:BP	regulation of dendritic cell chemotaxis	21100	29721	c("GO:0002407", "GO:0002688", "GO:0071675")
query_1	FALSE	1	10	211	2	0.00947867	0.2	GO:2000510	GO:BP	positive regulation of dendritic cell chemotaxis	21100	29723	c("GO:0002407", "GO:0002690", "GO:0071677", "GO:2000508")
query_1	FALSE	1	32	211	1	0.00473934	0.03125	GO:2000515	GO:BP	negative regulation of CD4-positive, alpha-beta T cell activation	21100	29728	c("GO:0035710", "GO:0046636", "GO:2000514")
query_1	FALSE	1	3	211	1	0.00473934	0.333333	GO:2000520	GO:BP	regulation of immunological synapse formation	21100	29733	c("GO:0001771", "GO:0051249")
query_1	FALSE	1	1	211	1	0.00473934	1	GO:2000522	GO:BP	positive regulation of immunological synapse formation	21100	29735	c("GO:0001771", "GO:0048522", "GO:2000520")
query_1	FALSE	1	6	211	2	0.00947867	0.333333	GO:2000523	GO:BP	regulation of T cell costimulation	21100	29736	c("GO:0031295", "GO:0050863", "GO:1903037")
query_1	FALSE	1	3	211	1	0.00473934	0.333333	GO:2000524	GO:BP	negative regulation of T cell costimulation	21100	29737	c("GO:0002683", "GO:0031295", "GO:2000523")
query_1	FALSE	1	3	211	1	0.00473934	0.333333	GO:2000525	GO:BP	positive regulation of T cell costimulation	21100	29738	c("GO:0031295", "GO:0050870", "GO:2000523")
query_1	FALSE	1	31	211	2	0.00947867	0.0645161	GO:2000406	GO:BP	positive regulation of T cell migration	21100	29625	c("GO:0072678", "GO:2000403", "GO:2000404")
query_1	FALSE	1	1	211	1	0.00473934	1	GO:2000526	GO:BP	positive regulation of glycoprotein biosynthetic process involved in immunological synapse formation	21100	29739	c("GO:0001771", "GO:0010560")
query_1	FALSE	1	8	211	1	0.00473934	0.125	GO:2000554	GO:BP	regulation of T-helper 1 cell cytokine production	21100	29767	c("GO:0002724", "GO:0002825", "GO:0035744")
query_1	FALSE	1	8	211	1	0.00473934	0.125	GO:2000556	GO:BP	positive regulation of T-helper 1 cell cytokine production	21100	29769	c("GO:0002726", "GO:0002827", "GO:0035744", "GO:2000554")
query_1	FALSE	1	8	211	2	0.00947867	0.25	GO:2000564	GO:BP	regulation of CD8-positive, alpha-beta T cell proliferation	21100	29777	c("GO:0035740", "GO:0046640", "GO:2001185")
query_1	FALSE	1	4	211	1	0.00473934	0.25	GO:2000566	GO:BP	positive regulation of CD8-positive, alpha-beta T cell proliferation	21100	29779	c("GO:0035740", "GO:0046641", "GO:2000564", "GO:2001187")
query_1	FALSE	1	74	211	1	0.00473934	0.0135135	GO:2000573	GO:BP	positive regulation of DNA biosynthetic process	21100	29786	c("GO:0010557", "GO:0031328", "GO:0051054", "GO:0071897", "GO:2000278")
query_1	FALSE	1	10	211	1	0.00473934	0.1	GO:2000601	GO:BP	positive regulation of Arp2/3 complex-mediated actin nucleation	21100	29811	c("GO:0034314", "GO:0034315", "GO:0051127")
query_1	FALSE	1	22	211	1	0.00473934	0.0454545	GO:2000637	GO:BP	positive regulation of miRNA-mediated gene silencing	21100	29847	c("GO:0035195", "GO:0060964", "GO:1900370")
query_1	FALSE	1	17	211	2	0.00947867	0.117647	GO:2000641	GO:BP	regulation of early endosome to late endosome transport	21100	29851	c("GO:0045022", "GO:0060627", "GO:1903649")
query_1	FALSE	1	31	211	1	0.00473934	0.0322581	GO:2000648	GO:BP	positive regulation of stem cell proliferation	21100	29858	c("GO:0008284", "GO:0072089", "GO:0072091")
query_1	FALSE	1	10	211	2	0.00947867	0.2	GO:2000668	GO:BP	regulation of dendritic cell apoptotic process	21100	29872	c("GO:0097048", "GO:2000106")
query_1	FALSE	1	6	211	1	0.00473934	0.166667	GO:2000669	GO:BP	negative regulation of dendritic cell apoptotic process	21100	29873	c("GO:0097048", "GO:2000107", "GO:2000668")
query_1	FALSE	1	4	211	1	0.00473934	0.25	GO:2000670	GO:BP	positive regulation of dendritic cell apoptotic process	21100	29874	c("GO:0097048", "GO:2000108", "GO:2000668")
query_1	FALSE	1	52	211	1	0.00473934	0.0192308	GO:2000677	GO:BP	regulation of transcription regulatory region DNA binding	21100	29881	GO:0051101
query_1	FALSE	1	24	211	1	0.00473934	0.0416667	GO:2000679	GO:BP	positive regulation of transcription regulatory region DNA binding	21100	29883	c("GO:0043388", "GO:2000677")
query_1	FALSE	1	3	211	1	0.00473934	0.333333	GO:2000547	GO:BP	regulation of dendritic cell dendrite assembly	21100	29760	c("GO:0097026", "GO:0120032")
query_1	FALSE	1	44	211	2	0.00947867	0.0454545	GO:2000404	GO:BP	regulation of T cell migration	21100	29623	c("GO:0072678", "GO:2000401")
query_1	FALSE	1	38	211	3	0.014218	0.0789474	GO:2000403	GO:BP	positive regulation of lymphocyte migration	21100	29622	c("GO:0071677", "GO:0072676", "GO:2000401")
query_1	FALSE	1	14	211	1	0.00473934	0.0714286	GO:2000402	GO:BP	negative regulation of lymphocyte migration	21100	29621	c("GO:0071676", "GO:0072676", "GO:2000401")
query_1	FALSE	1	281	211	3	0.014218	0.0106762	GO:2000146	GO:BP	negative regulation of cell motility	21100	29370	c("GO:0040013", "GO:0048870", "GO:0051271", "GO:2000145")
query_1	FALSE	1	89	211	2	0.00947867	0.0224719	GO:2000177	GO:BP	regulation of neural precursor cell proliferation	21100	29401	c("GO:0042127", "GO:0061351")
query_1	FALSE	1	22	211	1	0.00473934	0.0454545	GO:2000178	GO:BP	negative regulation of neural precursor cell proliferation	21100	29402	c("GO:0008285", "GO:0061351", "GO:2000177")
query_1	FALSE	1	53	211	1	0.00473934	0.0188679	GO:2000179	GO:BP	positive regulation of neural precursor cell proliferation	21100	29403	c("GO:0008284", "GO:0061351", "GO:2000177")
query_1	FALSE	1	104	211	3	0.014218	0.0288462	GO:2000181	GO:BP	negative regulation of blood vessel morphogenesis	21100	29405	c("GO:0022603", "GO:0048514", "GO:1901343")
query_1	FALSE	1	40	211	1	0.00473934	0.025	GO:2000249	GO:BP	regulation of actin cytoskeleton reorganization	21100	29471	c("GO:0031532", "GO:0032956")
query_1	FALSE	1	19	211	1	0.00473934	0.0526316	GO:2000251	GO:BP	positive regulation of actin cytoskeleton reorganization	21100	29473	c("GO:0031532", "GO:0051495", "GO:2000249")
query_1	FALSE	1	6	211	1	0.00473934	0.166667	GO:2000252	GO:BP	negative regulation of feeding behavior	21100	29474	c("GO:0007631", "GO:0048521", "GO:0060259")
query_1	FALSE	1	17	211	1	0.00473934	0.0588235	GO:2000269	GO:BP	regulation of fibroblast apoptotic process	21100	29491	c("GO:0042981", "GO:0044346")
query_1	FALSE	1	8	211	1	0.00473934	0.125	GO:2000271	GO:BP	positive regulation of fibroblast apoptotic process	21100	29493	c("GO:0043065", "GO:0044346", "GO:2000269")
query_1	FALSE	1	61	211	2	0.00947867	0.0327869	GO:2000272	GO:BP	negative regulation of signaling receptor activity	21100	29494	c("GO:0010469", "GO:0044092")
query_1	FALSE	1	45	211	3	0.014218	0.0666667	GO:2000273	GO:BP	positive regulation of signaling receptor activity	21100	29495	c("GO:0010469", "GO:0044093")
query_1	FALSE	1	124	211	1	0.00473934	0.00806452	GO:2000278	GO:BP	regulation of DNA biosynthetic process	21100	29500	c("GO:0010556", "GO:0031326", "GO:0051052", "GO:0071897")
query_1	FALSE	1	1	211	1	0.00473934	1	GO:2000292	GO:BP	regulation of defecation	21100	29514	c("GO:0030421", "GO:0044058", "GO:0044062")
query_1	FALSE	1	1	211	1	0.00473934	1	GO:2000293	GO:BP	negative regulation of defecation	21100	29515	c("GO:0030421", "GO:0051048", "GO:0060457", "GO:2000292")
query_1	FALSE	1	61	211	1	0.00473934	0.0163934	GO:2000300	GO:BP	regulation of synaptic vesicle exocytosis	21100	29522	c("GO:0016079", "GO:0046928", "GO:1903305")
query_1	FALSE	1	3	211	1	0.00473934	0.333333	GO:2000307	GO:BP	regulation of tumor necrosis factor (ligand) superfamily member 11 production	21100	29529	c("GO:0072535", "GO:1903555")
query_1	FALSE	1	68	211	4	0.0189573	0.0588235	GO:2000379	GO:BP	positive regulation of reactive oxygen species metabolic process	21100	29598	c("GO:0031325", "GO:0072593", "GO:2000377")
query_1	FALSE	1	140	211	6	0.028436	0.0428571	GO:2000377	GO:BP	regulation of reactive oxygen species metabolic process	21100	29596	c("GO:0031323", "GO:0072593")
query_1	FALSE	1	3	211	1	0.00473934	0.333333	GO:2000363	GO:BP	positive regulation of prostaglandin-E synthase activity	21100	29585	c("GO:0010912", "GO:2000361")
query_1	FALSE	1	3	211	1	0.00473934	0.333333	GO:2000361	GO:BP	regulation of prostaglandin-E synthase activity	21100	29583	GO:0010911
query_1	FALSE	1	19	211	3	0.014218	0.157895	GO:2000353	GO:BP	positive regulation of endothelial cell apoptotic process	21100	29575	c("GO:0072577", "GO:1904037", "GO:2000351")
query_1	FALSE	1	31	211	1	0.00473934	0.0322581	GO:2000352	GO:BP	negative regulation of endothelial cell apoptotic process	21100	29574	c("GO:0072577", "GO:1904036", "GO:2000351")
query_1	FALSE	1	18	211	1	0.00473934	0.0555556	GO:2000136	GO:BP	regulation of cell proliferation involved in heart morphogenesis	21100	29360	c("GO:0042127", "GO:0061323")
query_1	FALSE	1	51	211	4	0.0189573	0.0784314	GO:2000351	GO:BP	regulation of endothelial cell apoptotic process	21100	29573	c("GO:0072577", "GO:1904035")
query_1	FALSE	1	11	211	1	0.00473934	0.0909091	GO:2000347	GO:BP	positive regulation of hepatocyte proliferation	21100	29569	c("GO:0050679", "GO:0072574", "GO:2000345")
query_1	FALSE	1	17	211	1	0.00473934	0.0588235	GO:2000345	GO:BP	regulation of hepatocyte proliferation	21100	29567	c("GO:0050678", "GO:0072574")
query_1	FALSE	1	9	211	1	0.00473934	0.111111	GO:2000343	GO:BP	positive regulation of chemokine (C-X-C motif) ligand 2 production	21100	29565	c("GO:0032722", "GO:0072567", "GO:2000341")
query_1	FALSE	1	16	211	1	0.00473934	0.0625	GO:2000341	GO:BP	regulation of chemokine (C-X-C motif) ligand 2 production	21100	29563	c("GO:0032642", "GO:0072567")
query_1	FALSE	1	23	211	2	0.00947867	0.0869565	GO:2000310	GO:BP	regulation of NMDA receptor activity	21100	29532	c("GO:0099601", "GO:2001257")
query_1	FALSE	1	2	211	1	0.00473934	0.5	GO:2000309	GO:BP	positive regulation of tumor necrosis factor (ligand) superfamily member 11 production	21100	29531	c("GO:0072535", "GO:1903557", "GO:2000307")
query_1	FALSE	1	6	211	2	0.00947867	0.333333	GO:2000348	GO:BP	regulation of CD40 signaling pathway	21100	29570	c("GO:0009966", "GO:0023035")
query_1	FALSE	1	83	211	2	0.00947867	0.0240964	GO:2000736	GO:BP	regulation of stem cell differentiation	21100	29939	c("GO:0045595", "GO:0048863")
query_1	FALSE	1	49	211	4	0.0189573	0.0816327	GO:1904894	GO:BP	positive regulation of receptor signaling pathway via STAT	21100	27823	c("GO:0009967", "GO:0097696", "GO:1904892")
query_1	FALSE	1	18	211	1	0.00473934	0.0555556	GO:1904862	GO:BP	inhibitory synapse assembly	21100	27791	GO:0007416
query_1	FALSE	1	86	211	1	0.00473934	0.0116279	GO:1903350	GO:BP	response to dopamine	21100	26416	GO:0071869
query_1	FALSE	1	85	211	1	0.00473934	0.0117647	GO:1903351	GO:BP	cellular response to dopamine	21100	26417	c("GO:0071870", "GO:1903350")
query_1	FALSE	1	17	211	2	0.00947867	0.117647	GO:1903358	GO:BP	regulation of Golgi organization	21100	26424	c("GO:0007030", "GO:0033043")
query_1	FALSE	1	264	211	4	0.0189573	0.0151515	GO:1903362	GO:BP	regulation of cellular protein catabolic process	21100	26428	c("GO:0031329", "GO:0032268", "GO:0042176", "GO:0044257")
query_1	FALSE	1	80	211	1	0.00473934	0.0125	GO:1903363	GO:BP	negative regulation of cellular protein catabolic process	21100	26429	c("GO:0031330", "GO:0032269", "GO:0042177", "GO:0044257", "GO:1903362")
query_1	FALSE	1	158	211	3	0.014218	0.0189873	GO:1903364	GO:BP	positive regulation of cellular protein catabolic process	21100	26430	c("GO:0031331", "GO:0032270", "GO:0044257", "GO:0045732", "GO:1903362")
query_1	FALSE	1	55	211	4	0.0189573	0.0727273	GO:1903409	GO:BP	reactive oxygen species biosynthetic process	21100	26474	c("GO:0009058", "GO:0072593")
query_1	FALSE	1	20	211	1	0.00473934	0.05	GO:1903421	GO:BP	regulation of synaptic vesicle recycling	21100	26482	c("GO:0036465", "GO:0051049")
query_1	FALSE	1	8	211	1	0.00473934	0.125	GO:1903423	GO:BP	positive regulation of synaptic vesicle recycling	21100	26484	c("GO:0036465", "GO:0051050", "GO:1903421")
query_1	FALSE	1	42	211	3	0.014218	0.0714286	GO:1903426	GO:BP	regulation of reactive oxygen species biosynthetic process	21100	26486	c("GO:0009889", "GO:1903409", "GO:2000377")
query_1	FALSE	1	19	211	3	0.014218	0.157895	GO:1903428	GO:BP	positive regulation of reactive oxygen species biosynthetic process	21100	26488	c("GO:0009891", "GO:1903409", "GO:1903426", "GO:2000379")
query_1	FALSE	1	2	211	1	0.00473934	0.5	GO:1903436	GO:BP	regulation of mitotic cytokinetic process	21100	26496	c("GO:0032954", "GO:1902410", "GO:1902412")
query_1	FALSE	1	2	211	1	0.00473934	0.5	GO:1903438	GO:BP	positive regulation of mitotic cytokinetic process	21100	26498	c("GO:1902410", "GO:1903436", "GO:1903490")
query_1	FALSE	1	3	211	1	0.00473934	0.333333	GO:1903490	GO:BP	positive regulation of mitotic cytokinesis	21100	26546	c("GO:0000281", "GO:0032467", "GO:1902412")
query_1	FALSE	1	96	211	1	0.00473934	0.0104167	GO:1903321	GO:BP	negative regulation of protein modification by small protein conjugation or removal	21100	26388	c("GO:0031400", "GO:0070647", "GO:1903320")
query_1	FALSE	1	3452	211	44	0.208531	0.0127462	GO:1903506	GO:BP	regulation of nucleic acid-templated transcription	21100	26560	c("GO:0097659", "GO:2001141")
query_1	FALSE	1	1636	211	25	0.118483	0.0152812	GO:1903508	GO:BP	positive regulation of nucleic acid-templated transcription	21100	26562	c("GO:0097659", "GO:1902680", "GO:1903506")
query_1	FALSE	1	89	211	2	0.00947867	0.0224719	GO:1903510	GO:BP	mucopolysaccharide metabolic process	21100	26564	GO:0030203
query_1	FALSE	1	34	211	1	0.00473934	0.0294118	GO:1903514	GO:BP	release of sequestered calcium ion into cytosol by endoplasmic reticulum	21100	26568	GO:0051209
query_1	FALSE	1	251	211	2	0.00947867	0.00796813	GO:1903522	GO:BP	regulation of blood circulation	21100	26576	c("GO:0008015", "GO:0044057")
query_1	FALSE	1	39	211	1	0.00473934	0.025641	GO:1903524	GO:BP	positive regulation of blood circulation	21100	26578	c("GO:0008015", "GO:0051240", "GO:1903522")
query_1	FALSE	1	547	211	11	0.0521327	0.0201097	GO:1903530	GO:BP	regulation of secretion by cell	21100	26584	c("GO:0032940", "GO:0050794", "GO:0051046")
query_1	FALSE	1	137	211	3	0.014218	0.0218978	GO:1903531	GO:BP	negative regulation of secretion by cell	21100	26585	c("GO:0032940", "GO:0048523", "GO:0051048", "GO:1903530")
query_1	FALSE	1	275	211	5	0.0236967	0.0181818	GO:1903532	GO:BP	positive regulation of secretion by cell	21100	26586	c("GO:0032940", "GO:0048522", "GO:0051047", "GO:1903530")
query_1	FALSE	1	78	211	2	0.00947867	0.025641	GO:1903533	GO:BP	regulation of protein targeting	21100	26587	c("GO:0006605", "GO:0033157")
query_1	FALSE	1	17	211	1	0.00473934	0.0588235	GO:1903541	GO:BP	regulation of exosomal secretion	21100	26595	c("GO:0017157", "GO:0060341", "GO:1990182")
query_1	FALSE	1	15	211	1	0.00473934	0.0666667	GO:1903543	GO:BP	positive regulation of exosomal secretion	21100	26597	c("GO:0044089", "GO:0045921", "GO:1903541", "GO:1990182")
query_1	FALSE	1	62	211	4	0.0189573	0.0645161	GO:1903556	GO:BP	negative regulation of tumor necrosis factor superfamily cytokine production	21100	26609	c("GO:0001818", "GO:0071706", "GO:1903555")
query_1	FALSE	1	83	211	2	0.00947867	0.0240964	GO:1903578	GO:BP	regulation of ATP metabolic process	21100	26630	c("GO:0019222", "GO:0046034")
query_1	FALSE	1	34	211	1	0.00473934	0.0294118	GO:1903580	GO:BP	positive regulation of ATP metabolic process	21100	26632	c("GO:0009893", "GO:0046034", "GO:1903578")
query_1	FALSE	1	1295	211	11	0.0521327	0.00849421	GO:1903507	GO:BP	negative regulation of nucleic acid-templated transcription	21100	26561	c("GO:0097659", "GO:1902679", "GO:1903506")
query_1	FALSE	1	246	211	1	0.00473934	0.00406504	GO:1903320	GO:BP	regulation of protein modification by small protein conjugation or removal	21100	26387	c("GO:0031399", "GO:0070647")
query_1	FALSE	1	123	211	1	0.00473934	0.00813008	GO:1903313	GO:BP	positive regulation of mRNA metabolic process	21100	26380	c("GO:0016071", "GO:0051254", "GO:1903311")
query_1	FALSE	1	98	211	1	0.00473934	0.0102041	GO:1903312	GO:BP	negative regulation of mRNA metabolic process	21100	26379	c("GO:0016071", "GO:0051253", "GO:1903311")
query_1	FALSE	1	11	211	1	0.00473934	0.0909091	GO:1902947	GO:BP	regulation of tau-protein kinase activity	21100	26063	GO:0045859
query_1	FALSE	1	3	211	1	0.00473934	0.333333	GO:1902948	GO:BP	negative regulation of tau-protein kinase activity	21100	26064	c("GO:0006469", "GO:1902947")
query_1	FALSE	1	10	211	1	0.00473934	0.1	GO:1902959	GO:BP	regulation of aspartic-type endopeptidase activity involved in amyloid precursor protein catabolic process	21100	26075	c("GO:0052548", "GO:1902991", "GO:1905245")
query_1	FALSE	1	7	211	1	0.00473934	0.142857	GO:1902961	GO:BP	positive regulation of aspartic-type endopeptidase activity involved in amyloid precursor protein catabolic process	21100	26077	c("GO:0010950", "GO:1902959", "GO:1902993", "GO:1905247")
query_1	FALSE	1	41	211	2	0.00947867	0.0487805	GO:1902991	GO:BP	regulation of amyloid precursor protein catabolic process	21100	26106	c("GO:0042987", "GO:0051246")
query_1	FALSE	1	23	211	2	0.00947867	0.0869565	GO:1902993	GO:BP	positive regulation of amyloid precursor protein catabolic process	21100	26108	c("GO:0042987", "GO:0051247", "GO:1902991")
query_1	FALSE	1	51	211	2	0.00947867	0.0392157	GO:1903018	GO:BP	regulation of glycoprotein metabolic process	21100	26133	c("GO:0009100", "GO:0031323", "GO:0051246")
query_1	FALSE	1	27	211	2	0.00947867	0.0740741	GO:1903020	GO:BP	positive regulation of glycoprotein metabolic process	21100	26135	c("GO:0009100", "GO:0031325", "GO:0051247", "GO:1903018")
query_1	FALSE	1	10	211	2	0.00947867	0.2	GO:1903027	GO:BP	regulation of opsonization	21100	26142	c("GO:0002697", "GO:0008228", "GO:0050794")
query_1	FALSE	1	8	211	2	0.00947867	0.25	GO:1903028	GO:BP	positive regulation of opsonization	21100	26143	c("GO:0002699", "GO:0008228", "GO:0048522", "GO:0050766", "GO:1903027")
query_1	FALSE	1	159	211	4	0.0189573	0.0251572	GO:1903034	GO:BP	regulation of response to wounding	21100	26147	c("GO:0009611", "GO:0080134")
query_1	FALSE	1	87	211	1	0.00473934	0.0114943	GO:1903035	GO:BP	negative regulation of response to wounding	21100	26148	c("GO:0009611", "GO:0048585", "GO:1903034")
query_1	FALSE	1	70	211	1	0.00473934	0.0142857	GO:1903036	GO:BP	positive regulation of response to wounding	21100	26149	c("GO:0009611", "GO:0048584", "GO:1903034")
query_1	FALSE	1	207	211	1	0.00473934	0.00483092	GO:1903046	GO:BP	meiotic cell cycle process	21100	26159	c("GO:0022402", "GO:0022414", "GO:0051321")
query_1	FALSE	1	755	211	11	0.0521327	0.0145695	GO:1903047	GO:BP	mitotic cell cycle process	21100	26160	c("GO:0000278", "GO:0022402")
query_1	FALSE	1	229	211	3	0.014218	0.0131004	GO:1903050	GO:BP	regulation of proteolysis involved in cellular protein catabolic process	21100	26163	c("GO:0030162", "GO:0051603", "GO:1903362")
query_1	FALSE	1	67	211	1	0.00473934	0.0149254	GO:1903051	GO:BP	negative regulation of proteolysis involved in cellular protein catabolic process	21100	26164	c("GO:0045861", "GO:0051603", "GO:1903050", "GO:1903363")
query_1	FALSE	1	326	211	4	0.0189573	0.0122699	GO:1903311	GO:BP	regulation of mRNA metabolic process	21100	26378	c("GO:0016071", "GO:0051252")
query_1	FALSE	1	51	211	3	0.014218	0.0588235	GO:1903307	GO:BP	positive regulation of regulated secretory pathway	21100	26377	c("GO:0045055", "GO:0045921", "GO:1903305")
query_1	FALSE	1	24	211	2	0.00947867	0.0833333	GO:1903306	GO:BP	negative regulation of regulated secretory pathway	21100	26376	c("GO:0045055", "GO:0045920", "GO:1903305")
query_1	FALSE	1	145	211	7	0.0331754	0.0482759	GO:1903305	GO:BP	regulation of regulated secretory pathway	21100	26375	c("GO:0017157", "GO:0045055")
query_1	FALSE	1	9	211	1	0.00473934	0.111111	GO:1903251	GO:BP	multi-ciliated epithelial cell differentiation	21100	26330	GO:0030855
query_1	FALSE	1	43	211	1	0.00473934	0.0232558	GO:1903214	GO:BP	regulation of protein targeting to mitochondrion	21100	26295	c("GO:0006626", "GO:1903533", "GO:1903747")
query_1	FALSE	1	6	211	1	0.00473934	0.166667	GO:1903613	GO:BP	regulation of protein tyrosine phosphatase activity	21100	26664	GO:0043666
query_1	FALSE	1	47	211	1	0.00473934	0.0212766	GO:1903202	GO:BP	negative regulation of oxidative stress-induced cell death	21100	26284	c("GO:0036473", "GO:0060548", "GO:1903201")
query_1	FALSE	1	60	211	1	0.00473934	0.0166667	GO:1903078	GO:BP	positive regulation of protein localization to plasma membrane	21100	26191	c("GO:0072659", "GO:1903076", "GO:1904377", "GO:1905477")
query_1	FALSE	1	26	211	1	0.00473934	0.0384615	GO:1903077	GO:BP	negative regulation of protein localization to plasma membrane	21100	26190	c("GO:0072659", "GO:1903076", "GO:1904376", "GO:1905476")
query_1	FALSE	1	104	211	2	0.00947867	0.0192308	GO:1903076	GO:BP	regulation of protein localization to plasma membrane	21100	26189	c("GO:0072659", "GO:1904375", "GO:1905475")
query_1	FALSE	1	10	211	1	0.00473934	0.1	GO:1903054	GO:BP	negative regulation of extracellular matrix organization	21100	26167	c("GO:0030198", "GO:0051129", "GO:1903053")
query_1	FALSE	1	47	211	1	0.00473934	0.0212766	GO:1903053	GO:BP	regulation of extracellular matrix organization	21100	26166	c("GO:0030198", "GO:0051128")
query_1	FALSE	1	136	211	2	0.00947867	0.0147059	GO:1903052	GO:BP	positive regulation of proteolysis involved in cellular protein catabolic process	21100	26165	c("GO:0045862", "GO:0051603", "GO:1903050", "GO:1903364")
query_1	FALSE	1	70	211	1	0.00473934	0.0142857	GO:1903201	GO:BP	regulation of oxidative stress-induced cell death	21100	26283	c("GO:0010941", "GO:0036473", "GO:1900407")
query_1	FALSE	1	107	211	6	0.028436	0.0560748	GO:1904892	GO:BP	regulation of receptor signaling pathway via STAT	21100	27821	c("GO:0009966", "GO:0097696")
query_1	FALSE	1	3	211	1	0.00473934	0.333333	GO:1903615	GO:BP	positive regulation of protein tyrosine phosphatase activity	21100	26666	c("GO:0032516", "GO:1903613")
query_1	FALSE	1	1	211	1	0.00473934	1	GO:1903716	GO:BP	guanine transmembrane transport	21100	26765	c("GO:0015854", "GO:1904823")
query_1	FALSE	1	26	211	1	0.00473934	0.0384615	GO:1904353	GO:BP	regulation of telomere capping	21100	27328	c("GO:0016233", "GO:0032204")
query_1	FALSE	1	17	211	1	0.00473934	0.0588235	GO:1904355	GO:BP	positive regulation of telomere capping	21100	27330	c("GO:0016233", "GO:0032206", "GO:1904353")
query_1	FALSE	1	63	211	1	0.00473934	0.015873	GO:1904356	GO:BP	regulation of telomere maintenance via telomere lengthening	21100	27331	c("GO:0010833", "GO:0032204")
query_1	FALSE	1	37	211	1	0.00473934	0.027027	GO:1904358	GO:BP	positive regulation of telomere maintenance via telomere lengthening	21100	27333	c("GO:0010833", "GO:0032206", "GO:1904356")
query_1	FALSE	1	125	211	2	0.00947867	0.016	GO:1904375	GO:BP	regulation of protein localization to cell periphery	21100	27350	c("GO:0032880", "GO:0060341", "GO:1990778")
query_1	FALSE	1	28	211	1	0.00473934	0.0357143	GO:1904376	GO:BP	negative regulation of protein localization to cell periphery	21100	27351	c("GO:0048523", "GO:1903828", "GO:1904375", "GO:1990778")
query_1	FALSE	1	67	211	1	0.00473934	0.0149254	GO:1904377	GO:BP	positive regulation of protein localization to cell periphery	21100	27352	c("GO:0048522", "GO:1903829", "GO:1904375", "GO:1990778")
query_1	FALSE	1	25	211	1	0.00473934	0.04	GO:1904385	GO:BP	cellular response to angiotensin	21100	27360	c("GO:0071375", "GO:1990776")
query_1	FALSE	1	14	211	1	0.00473934	0.0714286	GO:1904406	GO:BP	negative regulation of nitric oxide metabolic process	21100	27380	c("GO:0046209", "GO:0051172", "GO:0080164")
query_1	FALSE	1	41	211	2	0.00947867	0.0487805	GO:1904407	GO:BP	positive regulation of nitric oxide metabolic process	21100	27381	c("GO:0046209", "GO:0051173", "GO:0080164")
query_1	FALSE	1	2	211	1	0.00473934	0.5	GO:1904438	GO:BP	regulation of iron ion import across plasma membrane	21100	27410	c("GO:0034759", "GO:0060341", "GO:0065008", "GO:0098711")
query_1	FALSE	1	1	211	1	0.00473934	1	GO:1904440	GO:BP	positive regulation of iron ion import across plasma membrane	21100	27412	c("GO:0034761", "GO:0098711", "GO:1904438")
query_1	FALSE	1	6	211	1	0.00473934	0.166667	GO:1904627	GO:BP	response to phorbol 13-acetate 12-myristate	21100	27575	c("GO:0033993", "GO:0097305", "GO:1901654")
query_1	FALSE	1	6	211	1	0.00473934	0.166667	GO:1904628	GO:BP	cellular response to phorbol 13-acetate 12-myristate	21100	27576	c("GO:0071396", "GO:0097306", "GO:1901655", "GO:1904627")
query_1	FALSE	1	2	211	1	0.00473934	0.5	GO:1904270	GO:BP	pyroptosome complex assembly	21100	27247	GO:0065003
query_1	FALSE	1	48	211	1	0.00473934	0.0208333	GO:1904645	GO:BP	response to amyloid-beta	21100	27593	GO:1901652
query_1	FALSE	1	108	211	2	0.00947867	0.0185185	GO:1904659	GO:BP	glucose transmembrane transport	21100	27607	GO:0008645
query_1	FALSE	1	56	211	1	0.00473934	0.0178571	GO:1904705	GO:BP	regulation of vascular associated smooth muscle cell proliferation	21100	27650	c("GO:0048660", "GO:1990874")
query_1	FALSE	1	23	211	1	0.00473934	0.0434783	GO:1904706	GO:BP	negative regulation of vascular associated smooth muscle cell proliferation	21100	27651	c("GO:0048662", "GO:1904705", "GO:1990874")
query_1	FALSE	1	6	211	1	0.00473934	0.166667	GO:1904747	GO:BP	positive regulation of apoptotic process involved in development	21100	27689	c("GO:0043065", "GO:0051094", "GO:1902742", "GO:1904748")
query_1	FALSE	1	13	211	1	0.00473934	0.0769231	GO:1904748	GO:BP	regulation of apoptotic process involved in development	21100	27690	c("GO:0042981", "GO:0050793", "GO:1902742")
query_1	FALSE	1	10	211	1	0.00473934	0.1	GO:1904779	GO:BP	regulation of protein localization to centrosome	21100	27718	c("GO:0032880", "GO:0060341", "GO:0071539")
query_1	FALSE	1	7	211	1	0.00473934	0.142857	GO:1904781	GO:BP	positive regulation of protein localization to centrosome	21100	27720	c("GO:0048522", "GO:0071539", "GO:1903829", "GO:1904779")
query_1	FALSE	1	6	211	2	0.00947867	0.333333	GO:1904783	GO:BP	positive regulation of NMDA glutamate receptor activity	21100	27722	c("GO:2000273", "GO:2000310", "GO:2001259")
query_1	FALSE	1	7	211	1	0.00473934	0.142857	GO:1904796	GO:BP	regulation of core promoter binding	21100	27735	GO:2000677
query_1	FALSE	1	6	211	1	0.00473934	0.166667	GO:1904798	GO:BP	positive regulation of core promoter binding	21100	27737	c("GO:1904796", "GO:2000679")
query_1	FALSE	1	5	211	2	0.00947867	0.4	GO:1904823	GO:BP	purine nucleobase transmembrane transport	21100	27758	c("GO:0006863", "GO:0072530")
query_1	FALSE	1	2	211	1	0.00473934	0.5	GO:1904842	GO:BP	response to nitroglycerin	21100	27775	c("GO:0010033", "GO:1901698", "GO:1901700")
query_1	FALSE	1	4	211	1	0.00473934	0.25	GO:1904844	GO:BP	response to L-glutamine	21100	27777	GO:0043200
query_1	FALSE	1	3	211	1	0.00473934	0.333333	GO:1904845	GO:BP	cellular response to L-glutamine	21100	27778	c("GO:0071230", "GO:1904844")
query_1	FALSE	1	39	211	1	0.00473934	0.025641	GO:1904646	GO:BP	cellular response to amyloid-beta	21100	27594	c("GO:1901653", "GO:1904645")
query_1	FALSE	1	2	211	1	0.00473934	0.5	GO:1904155	GO:BP	DN2 thymocyte differentiation	21100	27144	GO:0033077
query_1	FALSE	1	3	211	1	0.00473934	0.333333	GO:1904100	GO:BP	positive regulation of protein O-linked glycosylation	21100	27092	c("GO:0006493", "GO:0060050", "GO:1904098")
query_1	FALSE	1	3	211	1	0.00473934	0.333333	GO:1904098	GO:BP	regulation of protein O-linked glycosylation	21100	27090	c("GO:0006493", "GO:0060049")
query_1	FALSE	1	8	211	2	0.00947867	0.25	GO:1903719	GO:BP	regulation of I-kappaB phosphorylation	21100	26766	c("GO:0001932", "GO:0007252")
query_1	FALSE	1	1	211	1	0.00473934	1	GO:1903720	GO:BP	negative regulation of I-kappaB phosphorylation	21100	26767	c("GO:0001933", "GO:0007252", "GO:1903719")
query_1	FALSE	1	7	211	1	0.00473934	0.142857	GO:1903721	GO:BP	positive regulation of I-kappaB phosphorylation	21100	26768	c("GO:0001934", "GO:0007252", "GO:1903719")
query_1	FALSE	1	38	211	1	0.00473934	0.0263158	GO:1903725	GO:BP	regulation of phospholipid metabolic process	21100	26772	c("GO:0006644", "GO:0019216", "GO:0019220")
query_1	FALSE	1	7	211	1	0.00473934	0.142857	GO:1903726	GO:BP	negative regulation of phospholipid metabolic process	21100	26773	c("GO:0006644", "GO:0045833", "GO:0045936", "GO:1903725")
query_1	FALSE	1	14	211	1	0.00473934	0.0714286	GO:1903729	GO:BP	regulation of plasma membrane organization	21100	26776	c("GO:0007009", "GO:0051128")
query_1	FALSE	1	1	211	1	0.00473934	1	GO:1903730	GO:BP	regulation of phosphatidate phosphatase activity	21100	26777	c("GO:0010866", "GO:0010921", "GO:0071071")
query_1	FALSE	1	1	211	1	0.00473934	1	GO:1903741	GO:BP	negative regulation of phosphatidate phosphatase activity	21100	26779	c("GO:0010868", "GO:0010923", "GO:0071072", "GO:1903730")
query_1	FALSE	1	54	211	2	0.00947867	0.037037	GO:1903747	GO:BP	regulation of establishment of protein localization to mitochondrion	21100	26785	c("GO:0060341", "GO:0070201", "GO:0072655")
query_1	FALSE	1	40	211	2	0.00947867	0.05	GO:1903749	GO:BP	positive regulation of establishment of protein localization to mitochondrion	21100	26787	c("GO:0048522", "GO:0072655", "GO:1903747", "GO:1904951")
query_1	FALSE	1	20	211	1	0.00473934	0.05	GO:1903798	GO:BP	regulation of production of miRNAs involved in gene silencing by miRNA	21100	26827	c("GO:0035196", "GO:0070920")
query_1	FALSE	1	10	211	1	0.00473934	0.1	GO:1903800	GO:BP	positive regulation of production of miRNAs involved in gene silencing by miRNA	21100	26829	c("GO:0010628", "GO:0035196", "GO:0051254", "GO:1903798", "GO:2000637")
query_1	FALSE	1	193	211	2	0.00947867	0.0103627	GO:1903828	GO:BP	negative regulation of protein localization	21100	26851	c("GO:0008104", "GO:0032880", "GO:0048519")
query_1	FALSE	1	457	211	9	0.042654	0.0196937	GO:1903829	GO:BP	positive regulation of protein localization	21100	26852	c("GO:0008104", "GO:0032880", "GO:0048518")
query_1	FALSE	1	139	211	7	0.0331754	0.0503597	GO:1903900	GO:BP	regulation of viral life cycle	21100	26911	c("GO:0019058", "GO:0050792")
query_1	FALSE	1	26	211	2	0.00947867	0.0769231	GO:1903901	GO:BP	negative regulation of viral life cycle	21100	26912	c("GO:0019058", "GO:0048525", "GO:1903900")
query_1	FALSE	1	31	211	1	0.00473934	0.0322581	GO:1903955	GO:BP	positive regulation of protein targeting to mitochondrion	21100	26965	c("GO:0006626", "GO:0090316", "GO:1903214", "GO:1903749")
query_1	FALSE	1	10	211	1	0.00473934	0.1	GO:1904044	GO:BP	response to aldosterone	21100	27042	c("GO:0051385", "GO:0097305", "GO:1901654")
query_1	FALSE	1	37	211	3	0.014218	0.0810811	GO:1904037	GO:BP	positive regulation of epithelial cell apoptotic process	21100	27035	c("GO:0043065", "GO:1904019", "GO:1904035")
query_1	FALSE	1	49	211	1	0.00473934	0.0204082	GO:1904036	GO:BP	negative regulation of epithelial cell apoptotic process	21100	27034	c("GO:0043066", "GO:1904019", "GO:1904035")
query_1	FALSE	1	90	211	4	0.0189573	0.0444444	GO:1904035	GO:BP	regulation of epithelial cell apoptotic process	21100	27033	c("GO:0042981", "GO:1904019")
query_1	FALSE	1	53	211	1	0.00473934	0.0188679	GO:1904031	GO:BP	positive regulation of cyclin-dependent protein kinase activity	21100	27029	c("GO:0045860", "GO:1904029")
query_1	FALSE	1	30	211	1	0.00473934	0.0333333	GO:1904030	GO:BP	negative regulation of cyclin-dependent protein kinase activity	21100	27028	c("GO:0006469", "GO:1904029")
query_1	FALSE	1	27	211	2	0.00947867	0.0740741	GO:1903649	GO:BP	regulation of cytoplasmic transport	21100	26700	c("GO:0016482", "GO:0032386")
query_1	FALSE	1	116	211	2	0.00947867	0.0172414	GO:1904029	GO:BP	regulation of cyclin-dependent protein kinase activity	21100	27027	c("GO:0045859", "GO:0051726")
query_1	FALSE	1	162	211	5	0.0236967	0.0308642	GO:1904018	GO:BP	positive regulation of vasculature development	21100	27016	c("GO:0001944", "GO:0051094", "GO:0051240", "GO:1901342")
query_1	FALSE	1	2	211	1	0.00473934	0.5	GO:1903999	GO:BP	negative regulation of eating behavior	21100	26999	c("GO:0042755", "GO:1903998", "GO:2000252")
query_1	FALSE	1	8	211	1	0.00473934	0.125	GO:1903998	GO:BP	regulation of eating behavior	21100	26998	c("GO:0042755", "GO:0060259")
query_1	FALSE	1	8	211	1	0.00473934	0.125	GO:1903980	GO:BP	positive regulation of microglial cell activation	21100	26986	c("GO:0001774", "GO:0043032", "GO:0150078", "GO:1903978")
query_1	FALSE	1	8	211	1	0.00473934	0.125	GO:1903979	GO:BP	negative regulation of microglial cell activation	21100	26985	c("GO:0001774", "GO:0043031", "GO:0150079", "GO:1903978")
query_1	FALSE	1	18	211	2	0.00947867	0.111111	GO:1903978	GO:BP	regulation of microglial cell activation	21100	26984	c("GO:0001774", "GO:0043030", "GO:0150077")
query_1	FALSE	1	113	211	4	0.0189573	0.0353982	GO:1904019	GO:BP	epithelial cell apoptotic process	21100	27017	GO:0006915
query_1	FALSE	1	111	211	1	0.00473934	0.00900901	GO:2000779	GO:BP	regulation of double-strand break repair	21100	29981	c("GO:0006282", "GO:0006302")
query_1	FALSE	1	259	211	2	0.00947867	0.00772201	GO:2001020	GO:BP	regulation of response to DNA damage stimulus	21100	30220	c("GO:0006974", "GO:0080135")
query_1	FALSE	1	65	211	1	0.00473934	0.0153846	GO:2000781	GO:BP	positive regulation of double-strand break repair	21100	29983	c("GO:0006302", "GO:0045739", "GO:2000779")
query_1	FALSE	1	141	211	2	0.00947867	0.0141844	GO:2001022	GO:BP	positive regulation of response to DNA damage stimulus	21100	30222	c("GO:0006974", "GO:0048522", "GO:0048584", "GO:2001020")
query_1	FALSE	1	21	211	1	0.00473934	0.047619	GO:2001026	GO:BP	regulation of endothelial cell chemotaxis	21100	30226	c("GO:0010594", "GO:0035767", "GO:0050920")
query_1	FALSE	1	15	211	1	0.00473934	0.0666667	GO:2001028	GO:BP	positive regulation of endothelial cell chemotaxis	21100	30228	c("GO:0010595", "GO:0035767", "GO:0050921", "GO:2001026")
query_1	FALSE	1	145	211	3	0.014218	0.0206897	GO:2001056	GO:BP	positive regulation of cysteine-type endopeptidase activity	21100	30252	c("GO:0010950", "GO:2000116")
query_1	FALSE	1	76	211	4	0.0189573	0.0526316	GO:2001057	GO:BP	reactive nitrogen species metabolic process	21100	30253	GO:0006807
query_1	FALSE	1	15	211	1	0.00473934	0.0666667	GO:2001138	GO:BP	regulation of phospholipid transport	21100	30313	c("GO:0015914", "GO:0032368")
query_1	FALSE	1	14	211	1	0.00473934	0.0714286	GO:2001140	GO:BP	positive regulation of phospholipid transport	21100	30315	c("GO:0015914", "GO:0032370", "GO:2001138")
query_1	FALSE	1	3461	211	46	0.218009	0.013291	GO:2001141	GO:BP	regulation of RNA biosynthetic process	21100	30316	c("GO:0010556", "GO:0031326", "GO:0032774", "GO:0051252")
query_1	FALSE	1	358	211	4	0.0189573	0.0111732	GO:2001233	GO:BP	regulation of apoptotic signaling pathway	21100	30397	c("GO:0009966", "GO:0042981", "GO:0097190")
query_1	FALSE	1	224	211	2	0.00947867	0.00892857	GO:2001234	GO:BP	negative regulation of apoptotic signaling pathway	21100	30398	c("GO:0009968", "GO:0043066", "GO:0097190", "GO:2001233")
query_1	FALSE	1	128	211	2	0.00947867	0.015625	GO:2001235	GO:BP	positive regulation of apoptotic signaling pathway	21100	30399	c("GO:0009967", "GO:0043065", "GO:0097190", "GO:2001233")
query_1	FALSE	1	153	211	2	0.00947867	0.0130719	GO:2001236	GO:BP	regulation of extrinsic apoptotic signaling pathway	21100	30400	c("GO:0097191", "GO:2001233")
query_1	FALSE	1	97	211	1	0.00473934	0.0103093	GO:2001237	GO:BP	negative regulation of extrinsic apoptotic signaling pathway	21100	30401	c("GO:0097191", "GO:2001234", "GO:2001236")
query_1	FALSE	1	50	211	1	0.00473934	0.02	GO:2001238	GO:BP	positive regulation of extrinsic apoptotic signaling pathway	21100	30402	c("GO:0097191", "GO:2001235", "GO:2001236")
query_1	FALSE	1	166	211	1	0.00473934	0.0060241	GO:2001242	GO:BP	regulation of intrinsic apoptotic signaling pathway	21100	30406	c("GO:0097193", "GO:1902531", "GO:2001233")
query_1	FALSE	1	100	211	1	0.00473934	0.01	GO:2001243	GO:BP	negative regulation of intrinsic apoptotic signaling pathway	21100	30407	c("GO:0097193", "GO:1902532", "GO:2001234", "GO:2001242")
query_1	FALSE	1	103	211	1	0.00473934	0.00970874	GO:2001252	GO:BP	positive regulation of chromosome organization	21100	30416	c("GO:0010638", "GO:0033044", "GO:0051276")
query_1	FALSE	1	72	211	3	0.014218	0.0416667	GO:2001259	GO:BP	positive regulation of cation channel activity	21100	30423	c("GO:0032414", "GO:1904064", "GO:2001257")
query_1	FALSE	1	169	211	3	0.014218	0.0177515	GO:2001257	GO:BP	regulation of cation channel activity	21100	30421	c("GO:0032412", "GO:1904062")
query_1	FALSE	1	16	211	1	0.00473934	0.0625	GO:2001256	GO:BP	regulation of store-operated calcium entry	21100	30420	c("GO:0002115", "GO:0051924")
query_1	FALSE	1	30	211	1	0.00473934	0.0333333	GO:0051150	GO:BP	regulation of smooth muscle cell differentiation	21100	15619	c("GO:0051145", "GO:0051147")
query_1	FALSE	1	105	211	1	0.00473934	0.00952381	GO:0048259	GO:BP	regulation of receptor-mediated endocytosis	21100	14644	c("GO:0006898", "GO:0030100")
query_1	FALSE	1	129	211	2	0.00947867	0.0155039	GO:0051147	GO:BP	regulation of muscle cell differentiation	21100	15616	c("GO:0042692", "GO:0045595")
query_1	FALSE	1	3926	211	54	0.255924	0.0137545	GO:0010556	GO:BP	regulation of macromolecule biosynthetic process	21100	4707	c("GO:0009059", "GO:0009889", "GO:0060255")
query_1	FALSE	1	1859	211	31	0.146919	0.0166756	GO:0010557	GO:BP	positive regulation of macromolecule biosynthetic process	21100	4708	c("GO:0009059", "GO:0009891", "GO:0010556", "GO:0010604")
query_1	FALSE	1	1508	211	15	0.07109	0.00994695	GO:0010558	GO:BP	negative regulation of macromolecule biosynthetic process	21100	4709	c("GO:0009059", "GO:0009890", "GO:0010556", "GO:0010605")
query_1	FALSE	1	46	211	2	0.00947867	0.0434783	GO:0010559	GO:BP	regulation of glycoprotein biosynthetic process	21100	4710	c("GO:0009101", "GO:1903018", "GO:2000112")
query_1	FALSE	1	25	211	2	0.00947867	0.08	GO:0010560	GO:BP	positive regulation of glycoprotein biosynthetic process	21100	4711	c("GO:0009101", "GO:0010557", "GO:0010559", "GO:0031328", "GO:1903020")
query_1	FALSE	1	418	211	12	0.056872	0.0287081	GO:0010563	GO:BP	negative regulation of phosphorus metabolic process	21100	4714	c("GO:0006793", "GO:0031324", "GO:0051174")
query_1	FALSE	1	695	211	8	0.0379147	0.0115108	GO:0010564	GO:BP	regulation of cell cycle process	21100	4715	c("GO:0022402", "GO:0051726")
query_1	FALSE	1	147	211	2	0.00947867	0.0136054	GO:0010565	GO:BP	regulation of cellular ketone metabolic process	21100	4716	c("GO:0031323", "GO:0042180", "GO:0062012")
query_1	FALSE	1	72	211	1	0.00473934	0.0138889	GO:0010569	GO:BP	regulation of double-strand break repair via homologous recombination	21100	4720	c("GO:0000018", "GO:0000724", "GO:2000779")
query_1	FALSE	1	9	211	1	0.00473934	0.111111	GO:0010572	GO:BP	positive regulation of platelet activation	21100	4723	c("GO:0010543", "GO:0030168", "GO:0050867")
query_1	FALSE	1	41	211	2	0.00947867	0.0487805	GO:0010591	GO:BP	regulation of lamellipodium assembly	21100	4738	c("GO:0030032", "GO:0120032", "GO:1902743")
query_1	FALSE	1	29	211	1	0.00473934	0.0344828	GO:0010592	GO:BP	positive regulation of lamellipodium assembly	21100	4739	c("GO:0010591", "GO:0030032", "GO:0120034", "GO:1902745")
query_1	FALSE	1	167	211	3	0.014218	0.0179641	GO:0010594	GO:BP	regulation of endothelial cell migration	21100	4741	c("GO:0010632", "GO:0043542")
query_1	FALSE	1	105	211	3	0.014218	0.0285714	GO:0010595	GO:BP	positive regulation of endothelial cell migration	21100	4742	c("GO:0010594", "GO:0010634", "GO:0043542")
query_1	FALSE	1	8	211	1	0.00473934	0.125	GO:0010603	GO:BP	regulation of cytoplasmic mRNA processing body assembly	21100	4749	c("GO:0033962", "GO:1902115")
query_1	FALSE	1	3361	211	45	0.21327	0.0133889	GO:0010605	GO:BP	negative regulation of macromolecule metabolic process	21100	4751	c("GO:0009892", "GO:0043170", "GO:0060255")
query_1	FALSE	1	2	211	1	0.00473934	0.5	GO:0010607	GO:BP	negative regulation of cytoplasmic mRNA processing body assembly	21100	4753	c("GO:0010603", "GO:0033962", "GO:1902116")
query_1	FALSE	1	1104	211	9	0.042654	0.00815217	GO:0010608	GO:BP	post-transcriptional regulation of gene expression	21100	4754	GO:0010468
query_1	FALSE	1	53	211	1	0.00473934	0.0188679	GO:0010611	GO:BP	regulation of cardiac muscle hypertrophy	21100	4757	c("GO:0003300", "GO:0014743", "GO:0043502")
query_1	FALSE	1	27	211	1	0.00473934	0.037037	GO:0010614	GO:BP	negative regulation of cardiac muscle hypertrophy	21100	4760	c("GO:0003300", "GO:0010611", "GO:0014741")
query_1	FALSE	1	14	211	1	0.00473934	0.0714286	GO:0010623	GO:BP	programmed cell death involved in cell development	21100	4769	c("GO:0012501", "GO:0048468", "GO:0048869")
query_1	FALSE	1	1579	211	27	0.127962	0.0170994	GO:0010629	GO:BP	negative regulation of gene expression	21100	4774	c("GO:0010467", "GO:0010468", "GO:0010605")
query_1	FALSE	1	293	211	6	0.028436	0.0204778	GO:0010631	GO:BP	epithelial cell migration	21100	4776	c("GO:0001667", "GO:0090132")
query_1	FALSE	1	225	211	5	0.0236967	0.0222222	GO:0010632	GO:BP	regulation of epithelial cell migration	21100	4777	c("GO:0010631", "GO:0030334", "GO:0051239")
query_1	FALSE	1	147	211	5	0.0236967	0.0340136	GO:0010634	GO:BP	positive regulation of epithelial cell migration	21100	4779	c("GO:0010631", "GO:0010632", "GO:0030335")
query_1	FALSE	1	509	211	7	0.0331754	0.0137525	GO:0010638	GO:BP	positive regulation of organelle organization	21100	4783	c("GO:0006996", "GO:0033043", "GO:0051130")
query_1	FALSE	1	352	211	3	0.014218	0.00852273	GO:0010639	GO:BP	negative regulation of organelle organization	21100	4784	c("GO:0006996", "GO:0033043", "GO:0051129")
query_1	FALSE	1	1351	211	24	0.113744	0.0177646	GO:0010648	GO:BP	negative regulation of cell communication	21100	4793	c("GO:0007154", "GO:0010646", "GO:0048523")
query_1	FALSE	1	66	211	2	0.00947867	0.030303	GO:0010657	GO:BP	muscle cell apoptotic process	21100	4801	GO:0006915
query_1	FALSE	1	19	211	1	0.00473934	0.0526316	GO:0010544	GO:BP	negative regulation of platelet activation	21100	4701	c("GO:0010543", "GO:0030168", "GO:0030195", "GO:0050866")
query_1	FALSE	1	48	211	4	0.0189573	0.0833333	GO:0010543	GO:BP	regulation of platelet activation	21100	4700	c("GO:0030168", "GO:0050865")
query_1	FALSE	1	7	211	1	0.00473934	0.142857	GO:0010536	GO:BP	positive regulation of activation of Janus kinase activity	21100	4697	c("GO:0010533", "GO:0042976", "GO:0045860", "GO:0050731")
query_1	FALSE	1	9	211	1	0.00473934	0.111111	GO:0010533	GO:BP	regulation of activation of Janus kinase activity	21100	4696	c("GO:0042976", "GO:0045859", "GO:0050730")
query_1	FALSE	1	19395	211	205	0.971564	0.0105697	GO:0009987	GO:BP	cellular process	21100	4273	GO:0008150
query_1	FALSE	1	70	211	4	0.0189573	0.0571429	GO:0009988	GO:BP	cell-cell recognition	21100	4274	GO:0008037
query_1	FALSE	1	490	211	10	0.0473934	0.0204082	GO:0009991	GO:BP	response to extracellular stimulus	21100	4277	GO:0009605
query_1	FALSE	1	221	211	6	0.028436	0.0271493	GO:0010001	GO:BP	glial cell differentiation	21100	4285	c("GO:0030154", "GO:0042063")
query_1	FALSE	1	538	211	12	0.056872	0.0223048	GO:0010035	GO:BP	response to inorganic substance	21100	4309	GO:0042221
query_1	FALSE	1	350	211	6	0.028436	0.0171429	GO:0010038	GO:BP	response to metal ion	21100	4312	GO:0010035
query_1	FALSE	1	22	211	1	0.00473934	0.0454545	GO:0010042	GO:BP	response to manganese ion	21100	4316	GO:0010038
query_1	FALSE	1	52	211	1	0.00473934	0.0192308	GO:0010043	GO:BP	response to zinc ion	21100	4317	GO:0010038
query_1	FALSE	1	6	211	1	0.00473934	0.166667	GO:0010138	GO:BP	pyrimidine ribonucleotide salvage	21100	4411	c("GO:0009220", "GO:0032262")
query_1	FALSE	1	142	211	4	0.0189573	0.028169	GO:0010212	GO:BP	response to ionizing radiation	21100	4468	GO:0009314
query_1	FALSE	1	1010	211	11	0.0521327	0.0108911	GO:0010243	GO:BP	response to organonitrogen compound	21100	4496	c("GO:0010033", "GO:1901698")
query_1	FALSE	1	550	211	9	0.042654	0.0163636	GO:0010256	GO:BP	endomembrane system organization	21100	4508	GO:0016043
query_1	FALSE	1	12	211	1	0.00473934	0.0833333	GO:0010269	GO:BP	response to selenium ion	21100	4520	GO:0010035
query_1	FALSE	1	19	211	2	0.00947867	0.105263	GO:0010310	GO:BP	regulation of hydrogen peroxide metabolic process	21100	4534	c("GO:0042743", "GO:2000377")
query_1	FALSE	1	62	211	2	0.00947867	0.0322581	GO:0010660	GO:BP	regulation of muscle cell apoptotic process	21100	4804	c("GO:0010657", "GO:0042981")
query_1	FALSE	1	142	211	5	0.0236967	0.0352113	GO:0010324	GO:BP	membrane invagination	21100	4541	GO:0061024
query_1	FALSE	1	117	211	3	0.014218	0.025641	GO:0010389	GO:BP	regulation of G2/M transition of mitotic cell cycle	21100	4580	c("GO:0000086", "GO:1901990", "GO:1902749")
query_1	FALSE	1	29	211	1	0.00473934	0.0344828	GO:0010447	GO:BP	response to acidic pH	21100	4630	GO:0009268
query_1	FALSE	1	26	211	1	0.00473934	0.0384615	GO:0010460	GO:BP	positive regulation of heart rate	21100	4643	c("GO:0002027", "GO:0045823")
query_1	FALSE	1	249	211	4	0.0189573	0.0160643	GO:0010466	GO:BP	negative regulation of peptidase activity	21100	4647	c("GO:0045861", "GO:0051346", "GO:0052547")
query_1	FALSE	1	8963	211	89	0.421801	0.00992971	GO:0010467	GO:BP	gene expression	21100	4648	GO:0043170
query_1	FALSE	1	170	211	5	0.0236967	0.0294118	GO:0010469	GO:BP	regulation of signaling receptor activity	21100	4650	c("GO:0009966", "GO:0065009")
query_1	FALSE	1	509	211	3	0.014218	0.00589391	GO:0010498	GO:BP	proteasomal protein catabolic process	21100	4665	c("GO:0030163", "GO:0051603")
query_1	FALSE	1	339	211	4	0.0189573	0.0117994	GO:0010506	GO:BP	regulation of autophagy	21100	4672	c("GO:0006914", "GO:0031329")
query_1	FALSE	1	83	211	1	0.00473934	0.0120482	GO:0010507	GO:BP	negative regulation of autophagy	21100	4673	c("GO:0006914", "GO:0010506", "GO:0031330")
query_1	FALSE	1	141	211	2	0.00947867	0.0141844	GO:0010508	GO:BP	positive regulation of autophagy	21100	4674	c("GO:0006914", "GO:0010506", "GO:0031331")
query_1	FALSE	1	66	211	4	0.0189573	0.0606061	GO:0010517	GO:BP	regulation of phospholipase activity	21100	4683	GO:0060191
query_1	FALSE	1	55	211	4	0.0189573	0.0727273	GO:0010518	GO:BP	positive regulation of phospholipase activity	21100	4684	c("GO:0010517", "GO:0060193")
query_1	FALSE	1	27	211	2	0.00947867	0.0740741	GO:0010528	GO:BP	regulation of transposition	21100	4693	c("GO:0032196", "GO:0050794")
query_1	FALSE	1	27	211	2	0.00947867	0.0740741	GO:0010529	GO:BP	negative regulation of transposition	21100	4694	c("GO:0010528", "GO:0032196", "GO:0048523")
query_1	FALSE	1	55	211	4	0.0189573	0.0727273	GO:0010332	GO:BP	response to gamma radiation	21100	4543	GO:0010212
query_1	FALSE	1	23	211	2	0.00947867	0.0869565	GO:0010661	GO:BP	positive regulation of muscle cell apoptotic process	21100	4805	c("GO:0010657", "GO:0010660", "GO:0043065")
query_1	FALSE	1	148	211	1	0.00473934	0.00675676	GO:0010675	GO:BP	regulation of cellular carbohydrate metabolic process	21100	4819	c("GO:0006109", "GO:0031323", "GO:0044262")
query_1	FALSE	1	45	211	1	0.00473934	0.0222222	GO:0010677	GO:BP	negative regulation of cellular carbohydrate metabolic process	21100	4821	c("GO:0010675", "GO:0031324", "GO:0044262", "GO:0045912")
query_1	FALSE	1	8	211	1	0.00473934	0.125	GO:0010911	GO:BP	regulation of isomerase activity	21100	5032	GO:0050790
query_1	FALSE	1	8	211	1	0.00473934	0.125	GO:0010912	GO:BP	positive regulation of isomerase activity	21100	5033	c("GO:0010911", "GO:0043085")
query_1	FALSE	1	16	211	1	0.00473934	0.0625	GO:0010919	GO:BP	regulation of inositol phosphate biosynthetic process	21100	5040	c("GO:0010675", "GO:0019220", "GO:0031326", "GO:0032958", "GO:0043255", "GO:1902930")
query_1	FALSE	1	1	211	1	0.00473934	1	GO:0010920	GO:BP	negative regulation of inositol phosphate biosynthetic process	21100	5041	c("GO:0010677", "GO:0010919", "GO:0031327", "GO:0032958", "GO:0045936", "GO:1902931")
query_1	FALSE	1	84	211	5	0.0236967	0.0595238	GO:0010921	GO:BP	regulation of phosphatase activity	21100	5042	c("GO:0035303", "GO:0051336")
query_1	FALSE	1	36	211	3	0.014218	0.0833333	GO:0010922	GO:BP	positive regulation of phosphatase activity	21100	5043	c("GO:0010921", "GO:0035306", "GO:0051345")
query_1	FALSE	1	38	211	2	0.00947867	0.0526316	GO:0010923	GO:BP	negative regulation of phosphatase activity	21100	5044	c("GO:0010921", "GO:0035305", "GO:0051346")
query_1	FALSE	1	1	211	1	0.00473934	1	GO:0010924	GO:BP	regulation of inositol-polyphosphate 5-phosphatase activity	21100	5045	GO:0010921
query_1	FALSE	1	1	211	1	0.00473934	1	GO:0010925	GO:BP	positive regulation of inositol-polyphosphate 5-phosphatase activity	21100	5046	c("GO:0010922", "GO:0010924")
query_1	FALSE	1	16	211	1	0.00473934	0.0625	GO:0010934	GO:BP	macrophage cytokine production	21100	5055	GO:0061082
query_1	FALSE	1	16	211	1	0.00473934	0.0625	GO:0010935	GO:BP	regulation of macrophage cytokine production	21100	5056	c("GO:0002718", "GO:0010934")
query_1	FALSE	1	305	211	6	0.028436	0.0196721	GO:0010948	GO:BP	negative regulation of cell cycle process	21100	5067	c("GO:0010564", "GO:0022402", "GO:0045786")
query_1	FALSE	1	171	211	4	0.0189573	0.0233918	GO:0010950	GO:BP	positive regulation of endopeptidase activity	21100	5069	c("GO:0010952", "GO:0052548")
query_1	FALSE	1	240	211	4	0.0189573	0.0166667	GO:0010951	GO:BP	negative regulation of endopeptidase activity	21100	5070	c("GO:0010466", "GO:0052548")
query_1	FALSE	1	21	211	1	0.00473934	0.047619	GO:0010893	GO:BP	positive regulation of steroid biosynthetic process	21100	5014	c("GO:0006694", "GO:0045940", "GO:0046889", "GO:0050810")
query_1	FALSE	1	189	211	4	0.0189573	0.021164	GO:0010952	GO:BP	positive regulation of peptidase activity	21100	5071	c("GO:0045862", "GO:0051345", "GO:0052547")
query_1	FALSE	1	431	211	7	0.0331754	0.0162413	GO:0010975	GO:BP	regulation of neuron projection development	21100	5092	c("GO:0031175", "GO:0120035")
query_1	FALSE	1	149	211	3	0.014218	0.0201342	GO:0010976	GO:BP	positive regulation of neuron projection development	21100	5093	c("GO:0010975", "GO:0031175", "GO:0031346")
query_1	FALSE	1	135	211	2	0.00947867	0.0148148	GO:0010977	GO:BP	negative regulation of neuron projection development	21100	5094	c("GO:0010975", "GO:0031175", "GO:0031345")
query_1	FALSE	1	27	211	1	0.00473934	0.037037	GO:0010996	GO:BP	response to auditory stimulus	21100	5112	GO:0009612
query_1	FALSE	1	40	211	2	0.00947867	0.05	GO:0014002	GO:BP	astrocyte development	21100	5119	c("GO:0021782", "GO:0048708")
query_1	FALSE	1	44	211	1	0.00473934	0.0227273	GO:0014003	GO:BP	oligodendrocyte development	21100	5120	c("GO:0021782", "GO:0048709")
query_1	FALSE	1	42	211	2	0.00947867	0.047619	GO:0014009	GO:BP	glial cell proliferation	21100	5126	c("GO:0008283", "GO:0042063")
query_1	FALSE	1	94	211	3	0.014218	0.0319149	GO:0014013	GO:BP	regulation of gliogenesis	21100	5130	c("GO:0042063", "GO:0050767")
query_1	FALSE	1	61	211	3	0.014218	0.0491803	GO:0014015	GO:BP	positive regulation of gliogenesis	21100	5132	c("GO:0014013", "GO:0042063", "GO:0050769")
query_1	FALSE	1	83	211	2	0.00947867	0.0240964	GO:0014032	GO:BP	neural crest cell development	21100	5146	c("GO:0014033", "GO:0048864")
query_1	FALSE	1	95	211	2	0.00947867	0.0210526	GO:0014033	GO:BP	neural crest cell differentiation	21100	5147	c("GO:0048762", "GO:0048863")
query_1	FALSE	1	145	211	7	0.0331754	0.0482759	GO:0014065	GO:BP	phosphatidylinositol 3-kinase signaling	21100	5179	GO:0048015
query_1	FALSE	1	110	211	6	0.028436	0.0545455	GO:0014066	GO:BP	regulation of phosphatidylinositol 3-kinase signaling	21100	5180	c("GO:0014065", "GO:1902531")
query_1	FALSE	1	901	211	15	0.07109	0.0166482	GO:0014070	GO:BP	response to organic cyclic compound	21100	5183	GO:0010033
query_1	FALSE	1	81	211	3	0.014218	0.037037	GO:0010972	GO:BP	negative regulation of G2/M transition of mitotic cell cycle	21100	5089	c("GO:0000086", "GO:0010389", "GO:1901991", "GO:1902750")
query_1	FALSE	1	12	211	2	0.00947867	0.166667	GO:0009972	GO:BP	cytidine deamination	21100	4272	GO:0006216
query_1	FALSE	1	455	211	3	0.014218	0.00659341	GO:0010876	GO:BP	lipid localization	21100	4997	GO:0033036
query_1	FALSE	1	20	211	1	0.00473934	0.05	GO:0010866	GO:BP	regulation of triglyceride biosynthetic process	21100	4987	c("GO:0019432", "GO:0031326", "GO:0046890", "GO:0090207")
query_1	FALSE	1	9	211	1	0.00473934	0.111111	GO:0010692	GO:BP	regulation of alkaline phosphatase activity	21100	4835	GO:0010921
query_1	FALSE	1	3	211	1	0.00473934	0.333333	GO:0010693	GO:BP	negative regulation of alkaline phosphatase activity	21100	4836	c("GO:0010692", "GO:0010923")
query_1	FALSE	1	296	211	8	0.0379147	0.027027	GO:0010720	GO:BP	positive regulation of cell development	21100	4860	c("GO:0045597", "GO:0048468", "GO:0060284")
query_1	FALSE	1	174	211	2	0.00947867	0.0114943	GO:0010721	GO:BP	negative regulation of cell development	21100	4861	c("GO:0045596", "GO:0048468", "GO:0060284")
query_1	FALSE	1	6	211	1	0.00473934	0.166667	GO:0010726	GO:BP	positive regulation of hydrogen peroxide metabolic process	21100	4866	c("GO:0010310", "GO:0042743", "GO:2000379")
query_1	FALSE	1	8	211	1	0.00473934	0.125	GO:0010728	GO:BP	regulation of hydrogen peroxide biosynthetic process	21100	4868	c("GO:0010310", "GO:0031326", "GO:0050665", "GO:1903426")
query_1	FALSE	1	5	211	1	0.00473934	0.2	GO:0010729	GO:BP	positive regulation of hydrogen peroxide biosynthetic process	21100	4869	c("GO:0010726", "GO:0010728", "GO:0031328", "GO:0050665", "GO:1903428")
query_1	FALSE	1	97	211	2	0.00947867	0.0206186	GO:0010769	GO:BP	regulation of cell morphogenesis involved in differentiation	21100	4906	c("GO:0000904", "GO:0022604")
query_1	FALSE	1	80	211	1	0.00473934	0.0125	GO:0010770	GO:BP	positive regulation of cell morphogenesis involved in differentiation	21100	4907	c("GO:0000904", "GO:0010720", "GO:0010769")
query_1	FALSE	1	13	211	1	0.00473934	0.0769231	GO:0010771	GO:BP	negative regulation of cell morphogenesis involved in differentiation	21100	4908	c("GO:0000904", "GO:0010721", "GO:0010769")
query_1	FALSE	1	41	211	1	0.00473934	0.0243902	GO:0010799	GO:BP	regulation of peptidyl-threonine phosphorylation	21100	4936	c("GO:0001932", "GO:0018107")
query_1	FALSE	1	27	211	1	0.00473934	0.037037	GO:0010800	GO:BP	positive regulation of peptidyl-threonine phosphorylation	21100	4937	c("GO:0001934", "GO:0010799", "GO:0018107")
query_1	FALSE	1	53	211	1	0.00473934	0.0188679	GO:0010803	GO:BP	regulation of tumor necrosis factor-mediated signaling pathway	21100	4939	c("GO:0001959", "GO:0033209")
query_1	FALSE	1	212	211	4	0.0189573	0.0188679	GO:0010810	GO:BP	regulation of cell-substrate adhesion	21100	4944	c("GO:0030155", "GO:0031589")
query_1	FALSE	1	3	211	1	0.00473934	0.333333	GO:0010868	GO:BP	negative regulation of triglyceride biosynthetic process	21100	4989	c("GO:0010866", "GO:0019432", "GO:0031327", "GO:0051055", "GO:0090209")
query_1	FALSE	1	124	211	2	0.00947867	0.016129	GO:0010811	GO:BP	positive regulation of cell-substrate adhesion	21100	4945	c("GO:0010810", "GO:0031589", "GO:0045785")
query_1	FALSE	1	502	211	5	0.0236967	0.00996016	GO:0010817	GO:BP	regulation of hormone levels	21100	4951	GO:0065008
query_1	FALSE	1	28	211	3	0.014218	0.107143	GO:0010818	GO:BP	T cell chemotaxis	21100	4952	c("GO:0048247", "GO:0072678")
query_1	FALSE	1	17	211	2	0.00947867	0.117647	GO:0010819	GO:BP	regulation of T cell chemotaxis	21100	4953	c("GO:0010818", "GO:1901623", "GO:2000404")
query_1	FALSE	1	16	211	1	0.00473934	0.0625	GO:0010820	GO:BP	positive regulation of T cell chemotaxis	21100	4954	c("GO:0010818", "GO:0010819", "GO:0140131", "GO:2000406")
query_1	FALSE	1	152	211	1	0.00473934	0.00657895	GO:0010821	GO:BP	regulation of mitochondrion organization	21100	4955	c("GO:0007005", "GO:0033043")
query_1	FALSE	1	81	211	1	0.00473934	0.0123457	GO:0010822	GO:BP	positive regulation of mitochondrion organization	21100	4956	c("GO:0007005", "GO:0010638", "GO:0010821")
query_1	FALSE	1	47	211	1	0.00473934	0.0212766	GO:0010824	GO:BP	regulation of centrosome duplication	21100	4958	c("GO:0046605", "GO:0051298")
query_1	FALSE	1	73	211	1	0.00473934	0.0136986	GO:0010827	GO:BP	regulation of glucose transmembrane transport	21100	4961	c("GO:0034762", "GO:1904659")
query_1	FALSE	1	18	211	1	0.00473934	0.0555556	GO:0010829	GO:BP	negative regulation of glucose transmembrane transport	21100	4963	c("GO:0010827", "GO:0034763", "GO:1904659")
query_1	FALSE	1	42	211	1	0.00473934	0.0238095	GO:0010830	GO:BP	regulation of myotube differentiation	21100	4964	c("GO:0014902", "GO:0051153")
query_1	FALSE	1	84	211	1	0.00473934	0.0119048	GO:0010833	GO:BP	telomere maintenance via telomere lengthening	21100	4967	GO:0000723
query_1	FALSE	1	9	211	2	0.00947867	0.222222	GO:0010835	GO:BP	regulation of protein ADP-ribosylation	21100	4969	c("GO:0006471", "GO:0031399")
query_1	FALSE	1	35	211	1	0.00473934	0.0285714	GO:0010837	GO:BP	regulation of keratinocyte proliferation	21100	4971	c("GO:0043616", "GO:0050678")
query_1	FALSE	1	40	211	3	0.014218	0.075	GO:0010863	GO:BP	positive regulation of phospholipase C activity	21100	4984	c("GO:0010518", "GO:1900274")
query_1	FALSE	1	60	211	1	0.00473934	0.0166667	GO:0010812	GO:BP	negative regulation of cell-substrate adhesion	21100	4946	c("GO:0007162", "GO:0010810", "GO:0031589")
query_1	FALSE	1	1243	211	23	0.109005	0.0185036	GO:0009968	GO:BP	negative regulation of signal transduction	21100	4268	c("GO:0007165", "GO:0009966", "GO:0010648", "GO:0023057", "GO:0048585")
query_1	FALSE	1	295	211	4	0.0189573	0.0135593	GO:0009914	GO:BP	hormone transport	21100	4230	c("GO:0006810", "GO:0010817")
query_1	FALSE	1	218	211	3	0.014218	0.0137615	GO:0009913	GO:BP	epidermal cell differentiation	21100	4229	c("GO:0008544", "GO:0030855")
query_1	FALSE	1	4770	211	55	0.260664	0.0115304	GO:0009059	GO:BP	macromolecule biosynthetic process	21100	3662	c("GO:0043170", "GO:1901576")
query_1	FALSE	1	102	211	1	0.00473934	0.00980392	GO:0009062	GO:BP	fatty acid catabolic process	21100	3665	c("GO:0006631", "GO:0044242", "GO:0072329")
query_1	FALSE	1	113	211	2	0.00947867	0.0176991	GO:0009063	GO:BP	cellular amino acid catabolic process	21100	3666	c("GO:0006520", "GO:0046395", "GO:1901565")
query_1	FALSE	1	41	211	1	0.00473934	0.0243902	GO:0009069	GO:BP	serine family amino acid metabolic process	21100	3672	GO:1901605
query_1	FALSE	1	19	211	1	0.00473934	0.0526316	GO:0009070	GO:BP	serine family amino acid biosynthetic process	21100	3673	c("GO:0009069", "GO:1901607")
query_1	FALSE	1	30	211	2	0.00947867	0.0666667	GO:0009072	GO:BP	aromatic amino acid family metabolic process	21100	3675	c("GO:0006520", "GO:0006725", "GO:1901360")
query_1	FALSE	1	16	211	2	0.00947867	0.125	GO:0009074	GO:BP	aromatic amino acid family catabolic process	21100	3677	c("GO:0009072", "GO:0016054", "GO:0019439", "GO:1901361", "GO:1901565")
query_1	FALSE	1	379	211	3	0.014218	0.00791557	GO:0009100	GO:BP	glycoprotein metabolic process	21100	3702	c("GO:0019538", "GO:0044260", "GO:1901135")
query_1	FALSE	1	307	211	2	0.00947867	0.00651466	GO:0009101	GO:BP	glycoprotein biosynthetic process	21100	3703	c("GO:0009100", "GO:0034645", "GO:1901137", "GO:1901566")
query_1	FALSE	1	20	211	2	0.00947867	0.1	GO:0009110	GO:BP	vitamin biosynthetic process	21100	3711	c("GO:0006766", "GO:0044249", "GO:0044283")
query_1	FALSE	1	33	211	1	0.00473934	0.030303	GO:0009112	GO:BP	nucleobase metabolic process	21100	3713	c("GO:0055086", "GO:1901564")
query_1	FALSE	1	57	211	3	0.014218	0.0526316	GO:0009116	GO:BP	nucleoside metabolic process	21100	3717	c("GO:0055086", "GO:1901564", "GO:1901657")
query_1	FALSE	1	485	211	7	0.0331754	0.014433	GO:0009117	GO:BP	nucleotide metabolic process	21100	3718	GO:0006753
query_1	FALSE	1	37	211	3	0.014218	0.0810811	GO:0009119	GO:BP	ribonucleoside metabolic process	21100	3720	GO:0009116
query_1	FALSE	1	5861	211	66	0.312796	0.0112609	GO:0009058	GO:BP	biosynthetic process	21100	3661	GO:0008152
query_1	FALSE	1	79	211	2	0.00947867	0.0253165	GO:0009123	GO:BP	nucleoside monophosphate metabolic process	21100	3722	GO:0006753
query_1	FALSE	1	19	211	1	0.00473934	0.0526316	GO:0009125	GO:BP	nucleoside monophosphate catabolic process	21100	3724	c("GO:0009123", "GO:1901292")
query_1	FALSE	1	44	211	1	0.00473934	0.0227273	GO:0009126	GO:BP	purine nucleoside monophosphate metabolic process	21100	3725	GO:0009123
query_1	FALSE	1	22	211	1	0.00473934	0.0454545	GO:0009129	GO:BP	pyrimidine nucleoside monophosphate metabolic process	21100	3728	GO:0009123
query_1	FALSE	1	15	211	1	0.00473934	0.0666667	GO:0009130	GO:BP	pyrimidine nucleoside monophosphate biosynthetic process	21100	3729	c("GO:0009124", "GO:0009129")
query_1	FALSE	1	9	211	1	0.00473934	0.111111	GO:0009131	GO:BP	pyrimidine nucleoside monophosphate catabolic process	21100	3730	c("GO:0009125", "GO:0009129")
query_1	FALSE	1	131	211	4	0.0189573	0.0305344	GO:0009132	GO:BP	nucleoside diphosphate metabolic process	21100	3731	GO:0006753
query_1	FALSE	1	103	211	4	0.0189573	0.038835	GO:0009135	GO:BP	purine nucleoside diphosphate metabolic process	21100	3734	GO:0009132
query_1	FALSE	1	364	211	5	0.0236967	0.0137363	GO:0009150	GO:BP	purine ribonucleotide metabolic process	21100	3749	c("GO:0006163", "GO:0009259")
query_1	FALSE	1	34	211	1	0.00473934	0.0294118	GO:0009156	GO:BP	ribonucleoside monophosphate biosynthetic process	21100	3755	c("GO:0009124", "GO:0009161")
query_1	FALSE	1	15	211	1	0.00473934	0.0666667	GO:0009158	GO:BP	ribonucleoside monophosphate catabolic process	21100	3757	c("GO:0009125", "GO:0009161")
query_1	FALSE	1	14	211	1	0.00473934	0.0714286	GO:0009159	GO:BP	deoxyribonucleoside monophosphate catabolic process	21100	3758	c("GO:0009125", "GO:0009162")
query_1	FALSE	1	60	211	2	0.00947867	0.0333333	GO:0009161	GO:BP	ribonucleoside monophosphate metabolic process	21100	3759	GO:0009123
query_1	FALSE	1	25	211	1	0.00473934	0.04	GO:0009162	GO:BP	deoxyribonucleoside monophosphate metabolic process	21100	3760	GO:0009123
query_1	FALSE	1	25	211	3	0.014218	0.12	GO:0009164	GO:BP	nucleoside catabolic process	21100	3762	c("GO:0009116", "GO:0034656", "GO:1901565", "GO:1901658")
query_1	FALSE	1	44	211	1	0.00473934	0.0227273	GO:0009124	GO:BP	nucleoside monophosphate biosynthetic process	21100	3723	c("GO:0009123", "GO:1901293")
query_1	FALSE	1	253	211	2	0.00947867	0.00790514	GO:0009165	GO:BP	nucleotide biosynthetic process	21100	3763	c("GO:0009117", "GO:1901293")
query_1	FALSE	1	1359	211	14	0.0663507	0.0103017	GO:0009057	GO:BP	macromolecule catabolic process	21100	3660	c("GO:0043170", "GO:1901575")
query_1	FALSE	1	7	211	1	0.00473934	0.142857	GO:0008655	GO:BP	pyrimidine-containing compound salvage	21100	3653	c("GO:0034654", "GO:0043094")
query_1	FALSE	1	226	211	8	0.0379147	0.0353982	GO:0008037	GO:BP	cell recognition	21100	3503	GO:0009987
query_1	FALSE	1	30	211	1	0.00473934	0.0333333	GO:0008045	GO:BP	motor neuron axon guidance	21100	3507	GO:0007411
query_1	FALSE	1	160	211	6	0.028436	0.0375	GO:0008064	GO:BP	regulation of actin polymerization or depolymerization	21100	3518	c("GO:0008154", "GO:0030832", "GO:0110053")
query_1	FALSE	1	2665	211	30	0.14218	0.011257	GO:0008104	GO:BP	protein localization	21100	3529	GO:0033036
query_1	FALSE	1	21100	211	211	1	0.01	GO:0008150	GO:BP	biological_process	21100	3530	character(0)
query_1	FALSE	1	14415	211	139	0.658768	0.00964273	GO:0008152	GO:BP	metabolic process	21100	3531	GO:0008150
query_1	FALSE	1	199	211	7	0.0331754	0.0351759	GO:0008154	GO:BP	actin polymerization or depolymerization	21100	3533	GO:0007015
query_1	FALSE	1	319	211	3	0.014218	0.00940439	GO:0008202	GO:BP	steroid metabolic process	21100	3543	c("GO:0006629", "GO:1901360")
query_1	FALSE	1	8	211	1	0.00473934	0.125	GO:0008216	GO:BP	spermidine metabolic process	21100	3557	GO:0006595
query_1	FALSE	1	186	211	3	0.014218	0.016129	GO:0008217	GO:BP	regulation of blood pressure	21100	3558	c("GO:0008015", "GO:0065008")
query_1	FALSE	1	16	211	2	0.00947867	0.125	GO:0008228	GO:BP	opsonization	21100	3562	c("GO:0002252", "GO:0006910")
query_1	FALSE	1	137	211	2	0.00947867	0.0145985	GO:0008277	GO:BP	regulation of G protein-coupled receptor signaling pathway	21100	3566	c("GO:0007186", "GO:0009966")
query_1	FALSE	1	114	211	1	0.00473934	0.00877193	GO:0008286	GO:BP	insulin receptor signaling pathway	21100	3570	c("GO:0007169", "GO:0032869")
query_1	FALSE	1	82	211	1	0.00473934	0.0121951	GO:0008306	GO:BP	associative learning	21100	3579	GO:0007612
query_1	FALSE	1	2559	211	32	0.151659	0.0125049	GO:0009056	GO:BP	catabolic process	21100	3659	GO:0008152
query_1	FALSE	1	52	211	2	0.00947867	0.0384615	GO:0008347	GO:BP	glial cell migration	21100	3592	c("GO:0016477", "GO:0042063")
query_1	FALSE	1	142	211	3	0.014218	0.0211268	GO:0008366	GO:BP	axon ensheathment	21100	3605	GO:0007272
query_1	FALSE	1	1844	211	2	0.00947867	0.0010846	GO:0008380	GO:BP	RNA splicing	21100	3608	GO:0006396
query_1	FALSE	1	351	211	4	0.0189573	0.011396	GO:0008544	GO:BP	epidermis development	21100	3614	GO:0009888
query_1	FALSE	1	700	211	4	0.0189573	0.00571429	GO:0008610	GO:BP	lipid biosynthetic process	21100	3629	c("GO:0006629", "GO:1901576")
query_1	FALSE	1	2	211	1	0.00473934	0.5	GO:0008614	GO:BP	pyridoxine metabolic process	21100	3632	c("GO:0006725", "GO:0042816", "GO:1901615")
query_1	FALSE	1	2	211	1	0.00473934	0.5	GO:0008615	GO:BP	pyridoxine biosynthetic process	21100	3633	c("GO:0008614", "GO:0019438", "GO:0042819", "GO:1901617")
query_1	FALSE	1	83	211	2	0.00947867	0.0240964	GO:0008625	GO:BP	extrinsic apoptotic signaling pathway via death domain receptors	21100	3637	GO:0097191
query_1	FALSE	1	107	211	2	0.00947867	0.0186916	GO:0008630	GO:BP	intrinsic apoptotic signaling pathway in response to DNA damage	21100	3641	c("GO:0006974", "GO:0097193")
query_1	FALSE	1	45	211	1	0.00473934	0.0222222	GO:0008631	GO:BP	intrinsic apoptotic signaling pathway in response to oxidative stress	21100	3642	c("GO:0036473", "GO:0097193")
query_1	FALSE	1	107	211	2	0.00947867	0.0186916	GO:0008637	GO:BP	apoptotic mitochondrial changes	21100	3647	c("GO:0006915", "GO:0007005")
query_1	FALSE	1	155	211	3	0.014218	0.0193548	GO:0008643	GO:BP	carbohydrate transport	21100	3648	GO:0071702
query_1	FALSE	1	113	211	2	0.00947867	0.0176991	GO:0008645	GO:BP	hexose transmembrane transport	21100	3649	GO:0015749
query_1	FALSE	1	76	211	1	0.00473934	0.0131579	GO:0008652	GO:BP	cellular amino acid biosynthetic process	21100	3650	c("GO:0006520", "GO:0046394", "GO:1901566")
query_1	FALSE	1	264	211	3	0.014218	0.0113636	GO:0008654	GO:BP	phospholipid biosynthetic process	21100	3652	c("GO:0006644", "GO:0008610", "GO:0044249", "GO:0090407")
query_1	FALSE	1	184	211	6	0.028436	0.0326087	GO:0008361	GO:BP	regulation of cell size	21100	3600	GO:0032535
query_1	FALSE	1	144	211	2	0.00947867	0.0138889	GO:0014074	GO:BP	response to purine-containing compound	21100	5187	c("GO:0010243", "GO:0014070")
query_1	FALSE	1	73	211	1	0.00473934	0.0136986	GO:0009166	GO:BP	nucleotide catabolic process	21100	3764	c("GO:0009117", "GO:1901292")
query_1	FALSE	1	16	211	1	0.00473934	0.0625	GO:0009173	GO:BP	pyrimidine ribonucleoside monophosphate metabolic process	21100	3771	c("GO:0009129", "GO:0009161")
query_1	FALSE	1	171	211	2	0.00947867	0.0116959	GO:0009451	GO:BP	RNA modification	21100	3940	c("GO:0016070", "GO:0043412")
query_1	FALSE	1	140	211	1	0.00473934	0.00714286	GO:0009581	GO:BP	detection of external stimulus	21100	3958	c("GO:0009605", "GO:0051606")
query_1	FALSE	1	143	211	1	0.00473934	0.00699301	GO:0009582	GO:BP	detection of abiotic stimulus	21100	3959	c("GO:0009628", "GO:0051606")
query_1	FALSE	1	67	211	1	0.00473934	0.0149254	GO:0009583	GO:BP	detection of light stimulus	21100	3960	c("GO:0009416", "GO:0009581", "GO:0009582")
query_1	FALSE	1	483	211	1	0.00473934	0.00207039	GO:0009593	GO:BP	detection of chemical stimulus	21100	3968	c("GO:0042221", "GO:0051606")
query_1	FALSE	1	558	211	14	0.0663507	0.0250896	GO:0009611	GO:BP	response to wounding	21100	3983	GO:0006950
query_1	FALSE	1	208	211	5	0.0236967	0.0240385	GO:0009612	GO:BP	response to mechanical stimulus	21100	3984	c("GO:0009605", "GO:0009628")
query_1	FALSE	1	65	211	2	0.00947867	0.0307692	GO:0009620	GO:BP	response to fungus	21100	3990	GO:0051707
query_1	FALSE	1	1130	211	16	0.0758294	0.0141593	GO:0009628	GO:BP	response to abiotic stimulus	21100	3996	GO:0050896
query_1	FALSE	1	231	211	6	0.028436	0.025974	GO:0009636	GO:BP	response to toxic substance	21100	4004	GO:0042221
query_1	FALSE	1	2702	211	39	0.184834	0.0144338	GO:0009653	GO:BP	anatomical structure morphogenesis	21100	4021	c("GO:0032502", "GO:0048856")
query_1	FALSE	1	58	211	2	0.00947867	0.0344828	GO:0009712	GO:BP	catechol-containing compound metabolic process	21100	4060	GO:0018958
query_1	FALSE	1	21	211	1	0.00473934	0.047619	GO:0009713	GO:BP	catechol-containing compound biosynthetic process	21100	4061	c("GO:0009712", "GO:0046189")
query_1	FALSE	1	1557	211	21	0.0995261	0.0134875	GO:0009719	GO:BP	response to endogenous stimulus	21100	4067	GO:0050896
query_1	FALSE	1	2	211	1	0.00473934	0.5	GO:0009447	GO:BP	putrescine catabolic process	21100	3936	c("GO:0006598", "GO:0009445")
query_1	FALSE	1	839	211	11	0.0521327	0.0131108	GO:0009725	GO:BP	response to hormone	21100	4073	c("GO:0009719", "GO:0010033")
query_1	FALSE	1	193	211	1	0.00473934	0.00518135	GO:0009746	GO:BP	response to hexose	21100	4094	GO:0034284
query_1	FALSE	1	189	211	1	0.00473934	0.00529101	GO:0009749	GO:BP	response to glucose	21100	4097	GO:0009746
query_1	FALSE	1	1110	211	3	0.014218	0.0027027	GO:0009790	GO:BP	embryo development	21100	4132	GO:0007275
query_1	FALSE	1	89	211	2	0.00947867	0.0224719	GO:0009791	GO:BP	post-embryonic development	21100	4133	c("GO:0007275", "GO:0032501")
query_1	FALSE	1	674	211	2	0.00947867	0.00296736	GO:0009792	GO:BP	embryo development ending in birth or egg hatching	21100	4134	GO:0009790
query_1	FALSE	1	1072	211	11	0.0521327	0.0102612	GO:0009887	GO:BP	animal organ morphogenesis	21100	4207	c("GO:0009653", "GO:0048513")
query_1	FALSE	1	1940	211	20	0.0947867	0.0103093	GO:0009888	GO:BP	tissue development	21100	4208	GO:0048856
query_1	FALSE	1	4145	211	57	0.270142	0.0137515	GO:0009889	GO:BP	regulation of biosynthetic process	21100	4209	c("GO:0009058", "GO:0019222")
query_1	FALSE	1	1595	211	18	0.0853081	0.0112853	GO:0009890	GO:BP	negative regulation of biosynthetic process	21100	4210	c("GO:0009058", "GO:0009889", "GO:0009892")
query_1	FALSE	1	1999	211	34	0.161137	0.0170085	GO:0009891	GO:BP	positive regulation of biosynthetic process	21100	4211	c("GO:0009058", "GO:0009889", "GO:0009893")
query_1	FALSE	1	3570	211	50	0.236967	0.0140056	GO:0009892	GO:BP	negative regulation of metabolic process	21100	4212	c("GO:0008152", "GO:0019222", "GO:0048519")
query_1	FALSE	1	1009	211	14	0.0663507	0.0138751	GO:0009894	GO:BP	regulation of catabolic process	21100	4214	c("GO:0009056", "GO:0019222")
query_1	FALSE	1	325	211	3	0.014218	0.00923077	GO:0009895	GO:BP	negative regulation of catabolic process	21100	4215	c("GO:0009056", "GO:0009892", "GO:0009894")
query_1	FALSE	1	519	211	7	0.0331754	0.0134875	GO:0009896	GO:BP	positive regulation of catabolic process	21100	4216	c("GO:0009056", "GO:0009893", "GO:0009894")
query_1	FALSE	1	226	211	4	0.0189573	0.0176991	GO:0009743	GO:BP	response to carbohydrate	21100	4091	c("GO:0010033", "GO:1901700")
query_1	FALSE	1	42	211	1	0.00473934	0.0238095	GO:0009167	GO:BP	purine ribonucleoside monophosphate metabolic process	21100	3765	c("GO:0009126", "GO:0009161")
query_1	FALSE	1	5	211	1	0.00473934	0.2	GO:0009446	GO:BP	putrescine biosynthetic process	21100	3935	c("GO:0006596", "GO:0009445")
query_1	FALSE	1	26	211	1	0.00473934	0.0384615	GO:0009435	GO:BP	NAD biosynthetic process	21100	3924	GO:0019359
query_1	FALSE	1	11	211	1	0.00473934	0.0909091	GO:0009174	GO:BP	pyrimidine ribonucleoside monophosphate biosynthetic process	21100	3772	c("GO:0009130", "GO:0009156", "GO:0009173")
query_1	FALSE	1	6	211	1	0.00473934	0.166667	GO:0009175	GO:BP	pyrimidine ribonucleoside monophosphate catabolic process	21100	3773	c("GO:0009131", "GO:0009158", "GO:0009173")
query_1	FALSE	1	12	211	1	0.00473934	0.0833333	GO:0009176	GO:BP	pyrimidine deoxyribonucleoside monophosphate metabolic process	21100	3774	c("GO:0009129", "GO:0009162")
query_1	FALSE	1	8	211	1	0.00473934	0.125	GO:0009178	GO:BP	pyrimidine deoxyribonucleoside monophosphate catabolic process	21100	3776	c("GO:0009131", "GO:0009159", "GO:0009176")
query_1	FALSE	1	103	211	4	0.0189573	0.038835	GO:0009179	GO:BP	purine ribonucleoside diphosphate metabolic process	21100	3777	c("GO:0009135", "GO:0009185")
query_1	FALSE	1	112	211	4	0.0189573	0.0357143	GO:0009185	GO:BP	ribonucleoside diphosphate metabolic process	21100	3783	GO:0009132
query_1	FALSE	1	31	211	1	0.00473934	0.0322581	GO:0009218	GO:BP	pyrimidine ribonucleotide metabolic process	21100	3816	c("GO:0006220", "GO:0009259")
query_1	FALSE	1	24	211	1	0.00473934	0.0416667	GO:0009219	GO:BP	pyrimidine deoxyribonucleotide metabolic process	21100	3817	c("GO:0006220", "GO:0009394")
query_1	FALSE	1	23	211	1	0.00473934	0.0434783	GO:0009220	GO:BP	pyrimidine ribonucleotide biosynthetic process	21100	3818	c("GO:0006221", "GO:0009218", "GO:0009260")
query_1	FALSE	1	8	211	1	0.00473934	0.125	GO:0009222	GO:BP	pyrimidine ribonucleotide catabolic process	21100	3820	c("GO:0006244", "GO:0009218", "GO:0009261")
query_1	FALSE	1	18	211	1	0.00473934	0.0555556	GO:0009223	GO:BP	pyrimidine deoxyribonucleotide catabolic process	21100	3821	c("GO:0006244", "GO:0009219", "GO:0009264", "GO:0046386")
query_1	FALSE	1	383	211	6	0.028436	0.0156658	GO:0009259	GO:BP	ribonucleotide metabolic process	21100	3856	c("GO:0009117", "GO:0019693")
query_1	FALSE	1	182	211	1	0.00473934	0.00549451	GO:0009260	GO:BP	ribonucleotide biosynthetic process	21100	3857	c("GO:0009165", "GO:0009259", "GO:0046390")
query_1	FALSE	1	48	211	1	0.00473934	0.0208333	GO:0009261	GO:BP	ribonucleotide catabolic process	21100	3858	c("GO:0009166", "GO:0009259", "GO:1901136")
query_1	FALSE	1	8	211	2	0.00947867	0.25	GO:0009445	GO:BP	putrescine metabolic process	21100	3934	GO:0006595
query_1	FALSE	1	44	211	1	0.00473934	0.0227273	GO:0009262	GO:BP	deoxyribonucleotide metabolic process	21100	3859	c("GO:0009117", "GO:1901135")
query_1	FALSE	1	180	211	5	0.0236967	0.0277778	GO:0009266	GO:BP	response to temperature stimulus	21100	3863	GO:0009628
query_1	FALSE	1	166	211	2	0.00947867	0.0120482	GO:0009267	GO:BP	cellular response to starvation	21100	3864	c("GO:0031669", "GO:0033554", "GO:0042594")
query_1	FALSE	1	46	211	1	0.00473934	0.0217391	GO:0009268	GO:BP	response to pH	21100	3865	GO:0009628
query_1	FALSE	1	339	211	4	0.0189573	0.0117994	GO:0009306	GO:BP	protein secretion	21100	3886	c("GO:0015031", "GO:0032940", "GO:0035592")
query_1	FALSE	1	39	211	3	0.014218	0.0769231	GO:0009309	GO:BP	amine biosynthetic process	21100	3889	c("GO:0009308", "GO:0044271", "GO:1901566")
query_1	FALSE	1	27	211	3	0.014218	0.111111	GO:0009310	GO:BP	amine catabolic process	21100	3890	c("GO:0009308", "GO:1901565")
query_1	FALSE	1	442	211	5	0.0236967	0.0113122	GO:0009314	GO:BP	response to radiation	21100	3894	GO:0009628
query_1	FALSE	1	43	211	1	0.00473934	0.0232558	GO:0009394	GO:BP	2'-deoxyribonucleotide metabolic process	21100	3900	c("GO:0009262", "GO:0019692")
query_1	FALSE	1	54	211	2	0.00947867	0.037037	GO:0009395	GO:BP	phospholipid catabolic process	21100	3901	c("GO:0006644", "GO:0044242", "GO:0046434")
query_1	FALSE	1	9	211	1	0.00473934	0.111111	GO:0009396	GO:BP	folic acid-containing compound biosynthetic process	21100	3902	c("GO:0006760", "GO:0042398", "GO:0042559")
query_1	FALSE	1	107	211	4	0.0189573	0.0373832	GO:0009408	GO:BP	response to heat	21100	3913	c("GO:0006950", "GO:0009266")
query_1	FALSE	1	52	211	2	0.00947867	0.0384615	GO:0009409	GO:BP	response to cold	21100	3914	c("GO:0006950", "GO:0009266")
query_1	FALSE	1	408	211	7	0.0331754	0.0171569	GO:0009410	GO:BP	response to xenobiotic stimulus	21100	3915	GO:0042221
query_1	FALSE	1	314	211	1	0.00473934	0.00318471	GO:0009416	GO:BP	response to light stimulus	21100	3921	GO:0009314
query_1	FALSE	1	28	211	1	0.00473934	0.0357143	GO:0009264	GO:BP	deoxyribonucleotide catabolic process	21100	3861	c("GO:0009166", "GO:0009262", "GO:1901136")
query_1	FALSE	1	203	211	1	0.00473934	0.00492611	GO:0008016	GO:BP	regulation of heart contraction	21100	3501	c("GO:0060047", "GO:1903522")
query_1	FALSE	1	230	211	1	0.00473934	0.00434783	GO:0014706	GO:BP	striated muscle tissue development	21100	5191	GO:0060537
query_1	FALSE	1	29	211	1	0.00473934	0.0344828	GO:0014741	GO:BP	negative regulation of muscle hypertrophy	21100	5225	c("GO:0014743", "GO:0014896", "GO:0051241")
query_1	FALSE	1	1206	211	14	0.0663507	0.0116086	GO:0022402	GO:BP	cell cycle process	21100	7577	c("GO:0007049", "GO:0009987")
query_1	FALSE	1	86	211	2	0.00947867	0.0232558	GO:0022406	GO:BP	membrane docking	21100	7581	GO:0009987
query_1	FALSE	1	471	211	7	0.0331754	0.014862	GO:0022411	GO:BP	cellular component disassembly	21100	7586	GO:0016043
query_1	FALSE	1	1519	211	6	0.028436	0.00394997	GO:0022414	GO:BP	reproductive process	21100	7589	c("GO:0000003", "GO:0008150")
query_1	FALSE	1	104	211	1	0.00473934	0.00961538	GO:0022600	GO:BP	digestive system process	21100	7592	c("GO:0003008", "GO:0007586")
[truncated: 2,810 more rows]
