# Supplementary material for: Predicting clinical response to everolimus in ER+ breast cancers using machine-learning
Source: Front Mol Biosci. 2022 Oct 11;9:981962. doi: 10.3389/fmolb.2022.981962 (PMC9592823; doi:10.3389/fmolb.2022.981962)
Supplement: Supplementary file 6 [file Table1.XLSX]

## Sheet: Sheet1
Supplemental Table 1. ER+/HER2- breast cancer cell line response to everolimus and exemestane. Summary table of calculated IC50’s from a 4-day dose response of everolimus or exemestane across nine ER+/HER2- Breast cancer cell lines assessing viability as a measure of total ATP. Dose response curves were fit with a four-parameter variable slope log(inhibitor) vs. viability least squares nonlinear …
	Everolimus				Exemestane
Cell Line	IC50 (nM)	IC50	R2	% Viability	IC50 (µM)	IC50	R2	% Viability (at 100µM)*
		95% CI (nM)		(at 1,000nM)*		95% CI (µM)
BT483	0.08358	0.03749 - 0.1358	0.9593	39	48.72	34.09 - 99.11	0.757	53.7
CAMA-1	0.2784	0.2157 - 0.3604	0.9684	31.6	17.48	15.42 - 20.01	0.9647	10.2
HCC1428	0.75	0.4373 - 1.561	0.8231	73.3	29.67	N.D. - 36.79	0.8776	48
Ly2	7.091	2.412 – 10.52	0.8684	61	28.67	24.00 - 36.75	0.9675	34.5
MCF7	2.836	1.613 - 5.122	0.9445	41.6	28.77	N.D. - 33.38	0.945	34.4
MDA-MB-134	0.108	0.05682 - 0.1721	0.951	40.6	12.53	10.39 - 15.63	0.9751	9.98
MDA-MB-175	0.1726	N.D. - 1.072	0.7385	61	29.08	20.68 - 68.78	0.9394	11.8
T47D	0.3079	0.2093 - 0.443	0.954	35.8	25.8	22.59 - 30.45	0.979	20
ZR-75-1	0.3998	0.2494 - 0.6651	0.9288	30.8	55.12	40.76 - 75.18	0.8324	29.9
