# Supplementary material for: Predicting clinical response to everolimus in ER+ breast cancers using machine-learning
Source: Front Mol Biosci. 2022 Oct 11;9:981962. doi: 10.3389/fmolb.2022.981962 (PMC9592823; doi:10.3389/fmolb.2022.981962)
Supplement: Supplementary file 7 [file Table5.XLSX]

## Sheet: Supp_Table_5
query	significant	p_value	term_size	query_size	intersection_size	precision	recall	term_id	source	term_name	effective_domain_size	source_order	parents
query_1	TRUE	0.0202439	37	26	3	0.115385	0.0810811	GO:0045880	GO:BP	positive regulation of smoothened signaling pathway	21100	13590	c("GO:0007224", "GO:0008589", "GO:0009967")
query_1	TRUE	0.042253	142	26	4	0.153846	0.028169	GO:0007224	GO:BP	smoothened signaling pathway	21100	3121	GO:0007166
query_1	FALSE	0.105331	10	26	2	0.0769231	0.2	GO:0060525	GO:BP	prostate glandular acinus development	21100	17290	c("GO:0030850", "GO:0048608")
query_1	FALSE	0.138824	70	26	3	0.115385	0.0428571	GO:0061512	GO:BP	protein localization to cilium	21100	18209	GO:0033365
query_1	FALSE	0.154251	12	26	2	0.0769231	0.166667	GO:1903441	GO:BP	protein localization to ciliary membrane	21100	26499	c("GO:0061512", "GO:0072657", "GO:1990778")
query_1	FALSE	0.17818	398	26	5	0.192308	0.0125628	GO:0007018	GO:BP	microtubule-based movement	21100	2939	c("GO:0006928", "GO:0007017")
query_1	FALSE	0.238898	84	26	3	0.115385	0.0357143	GO:0008589	GO:BP	regulation of smoothened signaling pathway	21100	3622	c("GO:0007224", "GO:0009966")
query_1	FALSE	0.272929	436	26	5	0.192308	0.0114679	GO:0048608	GO:BP	reproductive structure development	21100	14910	c("GO:0003006", "GO:0048856", "GO:0061458")
query_1	FALSE	0.281787	439	26	5	0.192308	0.0113895	GO:0061458	GO:BP	reproductive system development	21100	18185	GO:0048731
query_1	FALSE	0.535801	22	26	2	0.0769231	0.0909091	GO:0032402	GO:BP	melanosome transport	21100	8738	c("GO:0032400", "GO:0032401", "GO:0051904")
query_1	FALSE	0.586385	23	26	2	0.0769231	0.0869565	GO:0032401	GO:BP	establishment of melanosome localization	21100	8737	c("GO:0032400", "GO:0051905")
query_1	FALSE	0.586385	23	26	2	0.0769231	0.0869565	GO:0051904	GO:BP	pigment granule transport	21100	16176	c("GO:0006810", "GO:0051875", "GO:0051905")
query_1	FALSE	0.586385	23	26	2	0.0769231	0.0869565	GO:0021904	GO:BP	dorsal/ventral neural tube patterning	21100	7440	c("GO:0009953", "GO:0021532")
query_1	FALSE	0.639208	24	26	2	0.0769231	0.0833333	GO:0051905	GO:BP	establishment of pigment granule localization	21100	16177	c("GO:0051650", "GO:0051875")
query_1	FALSE	0.694265	25	26	2	0.0769231	0.08	GO:0032400	GO:BP	melanosome localization	21100	8736	GO:0051875
query_1	FALSE	0.694265	25	26	2	0.0769231	0.08	GO:0051570	GO:BP	regulation of histone H3-K9 methylation	21100	15938	c("GO:0031060", "GO:0051567")
query_1	FALSE	0.699133	294	26	4	0.153846	0.0136054	GO:0006338	GO:BP	chromatin remodeling	21100	2343	GO:0006325
query_1	FALSE	0.751551	26	26	2	0.0769231	0.0769231	GO:0051875	GO:BP	pigment granule localization	21100	16150	c("GO:0033059", "GO:0051648")
query_1	FALSE	0.811061	27	26	2	0.0769231	0.0740741	GO:0060740	GO:BP	prostate gland epithelium morphogenesis	21100	17494	c("GO:0002009", "GO:0003006", "GO:0060512")
query_1	FALSE	0.93673	29	26	2	0.0769231	0.0689655	GO:0060512	GO:BP	prostate gland morphogenesis	21100	17277	c("GO:0003006", "GO:0022612", "GO:0030850")
query_1	FALSE	1	7	26	1	0.0384615	0.142857	GO:0052651	GO:BP	monoacylglycerol catabolic process	21100	16684	c("GO:0046462", "GO:0046464")
query_1	FALSE	1	13	26	1	0.0384615	0.0769231	GO:0051573	GO:BP	negative regulation of histone H3-K9 methylation	21100	15941	c("GO:0031061", "GO:0051567", "GO:0051570")
query_1	FALSE	1	11	26	1	0.0384615	0.0909091	GO:0051574	GO:BP	positive regulation of histone H3-K9 methylation	21100	15942	c("GO:0031062", "GO:0051567", "GO:0051570")
query_1	FALSE	1	778	26	1	0.0384615	0.00128535	GO:0051603	GO:BP	proteolysis involved in cellular protein catabolic process	21100	15966	c("GO:0006508", "GO:0044257")
query_1	FALSE	1	645	26	1	0.0384615	0.00155039	GO:0051606	GO:BP	detection of stimulus	21100	15968	GO:0050896
query_1	FALSE	1	542	26	2	0.0769231	0.00369004	GO:0051640	GO:BP	organelle localization	21100	15999	GO:0051641
query_1	FALSE	1	412	26	1	0.0384615	0.00242718	GO:0052548	GO:BP	regulation of endopeptidase activity	21100	16660	GO:0052547
query_1	FALSE	1	3031	26	6	0.230769	0.00197954	GO:0051641	GO:BP	cellular localization	21100	16000	c("GO:0009987", "GO:0051179")
query_1	FALSE	1	190	26	2	0.0769231	0.0105263	GO:0051648	GO:BP	vesicle localization	21100	16007	GO:0051640
query_1	FALSE	1	440	26	1	0.0384615	0.00227273	GO:0052547	GO:BP	regulation of peptidase activity	21100	16659	c("GO:0030162", "GO:0051336")
query_1	FALSE	1	2196	26	3	0.115385	0.00136612	GO:0051649	GO:BP	establishment of localization in cell	21100	16008	c("GO:0051234", "GO:0051641")
query_1	FALSE	1	173	26	2	0.0769231	0.0115607	GO:0051650	GO:BP	establishment of vesicle localization	21100	16009	c("GO:0051648", "GO:0051649", "GO:0051656")
query_1	FALSE	1	410	26	2	0.0769231	0.00487805	GO:0051656	GO:BP	establishment of organelle localization	21100	16015	c("GO:0051234", "GO:0051640")
query_1	FALSE	1	877	26	2	0.0769231	0.0022805	GO:0051668	GO:BP	localization within membrane	21100	16026	GO:0051641
query_1	FALSE	1	1655	26	2	0.0769231	0.00120846	GO:0051674	GO:BP	localization of cell	21100	16030	c("GO:0009987", "GO:0051179")
query_1	FALSE	1	102	26	1	0.0384615	0.00980392	GO:0051702	GO:BP	biological process involved in interaction with symbiont	21100	16052	GO:0044403
query_1	FALSE	1	249	26	1	0.0384615	0.00401606	GO:0051924	GO:BP	regulation of calcium ion transport	21100	16186	c("GO:0006816", "GO:0010959")
query_1	FALSE	1	27	26	1	0.0384615	0.037037	GO:0051571	GO:BP	positive regulation of histone H3-K4 methylation	21100	15939	c("GO:0031062", "GO:0051568", "GO:0051569")
query_1	FALSE	1	1089	26	1	0.0384615	0.000918274	GO:0051726	GO:BP	regulation of cell cycle	21100	16066	c("GO:0007049", "GO:0050794")
query_1	FALSE	1	67	26	1	0.0384615	0.0149254	GO:0051851	GO:BP	modulation by host of symbiont process	21100	16135	GO:0051702
query_1	FALSE	1	7399	26	9	0.346154	0.00121638	GO:0051716	GO:BP	cellular response to stimulus	21100	16064	c("GO:0009987", "GO:0050896")
query_1	FALSE	1	992	26	3	0.115385	0.00302419	GO:0051336	GO:BP	regulation of hydrolase activity	21100	15776	GO:0050790
query_1	FALSE	1	72	26	1	0.0384615	0.0138889	GO:0051568	GO:BP	histone H3-K4 methylation	21100	15936	GO:0034968
query_1	FALSE	1	2276	26	2	0.0769231	0.000878735	GO:0051128	GO:BP	regulation of cellular component organization	21100	15598	c("GO:0016043", "GO:0050794")
query_1	FALSE	1	1046	26	2	0.0769231	0.00191205	GO:0051130	GO:BP	positive regulation of cellular component organization	21100	15600	c("GO:0016043", "GO:0048522", "GO:0051128")
query_1	FALSE	1	5654	26	9	0.346154	0.00159179	GO:0051171	GO:BP	regulation of nitrogen compound metabolic process	21100	15640	c("GO:0006807", "GO:0019222")
query_1	FALSE	1	2371	26	7	0.269231	0.00295234	GO:0051172	GO:BP	negative regulation of nitrogen compound metabolic process	21100	15641	c("GO:0006807", "GO:0009892", "GO:0051171")
query_1	FALSE	1	3083	26	5	0.192308	0.0016218	GO:0051173	GO:BP	positive regulation of nitrogen compound metabolic process	21100	15642	c("GO:0006807", "GO:0009893", "GO:0051171")
query_1	FALSE	1	1388	26	1	0.0384615	0.000720461	GO:0051174	GO:BP	regulation of phosphorus metabolic process	21100	15643	c("GO:0006793", "GO:0031323")
query_1	FALSE	1	6436	26	10	0.384615	0.00155376	GO:0051179	GO:BP	localization	21100	15648	GO:0008150
query_1	FALSE	1	199	26	1	0.0384615	0.00502513	GO:0051216	GO:BP	cartilage development	21100	15678	c("GO:0001501", "GO:0048513", "GO:0061448")
query_1	FALSE	1	4903	26	6	0.230769	0.00122374	GO:0051234	GO:BP	establishment of localization	21100	15692	GO:0051179
query_1	FALSE	1	2666	26	6	0.230769	0.00225056	GO:0051239	GO:BP	regulation of multicellular organismal process	21100	15697	c("GO:0032501", "GO:0050789")
query_1	FALSE	1	1434	26	3	0.115385	0.00209205	GO:0051240	GO:BP	positive regulation of multicellular organismal process	21100	15698	c("GO:0032501", "GO:0048518", "GO:0051239")
query_1	FALSE	1	1000	26	2	0.0769231	0.002	GO:0051241	GO:BP	negative regulation of multicellular organismal process	21100	15699	c("GO:0032501", "GO:0048519", "GO:0051239")
query_1	FALSE	1	2536	26	4	0.153846	0.00157729	GO:0051246	GO:BP	regulation of protein metabolic process	21100	15701	c("GO:0019538", "GO:0051171", "GO:0060255", "GO:0080090")
query_1	FALSE	1	1493	26	2	0.0769231	0.00133958	GO:0051247	GO:BP	positive regulation of protein metabolic process	21100	15702	c("GO:0010604", "GO:0019538", "GO:0051173", "GO:0051246")
query_1	FALSE	1	1034	26	2	0.0769231	0.00193424	GO:0051248	GO:BP	negative regulation of protein metabolic process	21100	15703	c("GO:0010605", "GO:0019538", "GO:0051172", "GO:0051246")
query_1	FALSE	1	529	26	1	0.0384615	0.00189036	GO:0051249	GO:BP	regulation of lymphocyte activation	21100	15704	c("GO:0002694", "GO:0046649")
query_1	FALSE	1	368	26	1	0.0384615	0.00271739	GO:0051251	GO:BP	positive regulation of lymphocyte activation	21100	15706	c("GO:0002696", "GO:0046649", "GO:0051249")
query_1	FALSE	1	3753	26	6	0.230769	0.00159872	GO:0051252	GO:BP	regulation of RNA metabolic process	21100	15707	c("GO:0016070", "GO:0019219", "GO:0060255")
query_1	FALSE	1	1409	26	5	0.192308	0.00354862	GO:0051253	GO:BP	negative regulation of RNA metabolic process	21100	15708	c("GO:0010605", "GO:0016070", "GO:0045934", "GO:0051252")
query_1	FALSE	1	1769	26	4	0.153846	0.00226116	GO:0051254	GO:BP	positive regulation of RNA metabolic process	21100	15709	c("GO:0010604", "GO:0016070", "GO:0045935", "GO:0051252")
query_1	FALSE	1	253	26	1	0.0384615	0.00395257	GO:0051259	GO:BP	protein complex oligomerization	21100	15714	GO:0065003
query_1	FALSE	1	193	26	1	0.0384615	0.00518135	GO:0051260	GO:BP	protein homooligomerization	21100	15715	GO:0051259
query_1	FALSE	1	1059	26	4	0.153846	0.00377715	GO:0051276	GO:BP	chromosome organization	21100	15725	GO:0006996
query_1	FALSE	1	511	26	1	0.0384615	0.00195695	GO:0055065	GO:BP	metal ion homeostasis	21100	16770	c("GO:0055080", "GO:0098771")
query_1	FALSE	1	573	26	2	0.0769231	0.0034904	GO:0051345	GO:BP	positive regulation of hydrolase activity	21100	15785	c("GO:0043085", "GO:0051336")
query_1	FALSE	1	353	26	1	0.0384615	0.00283286	GO:0051346	GO:BP	negative regulation of hydrolase activity	21100	15786	c("GO:0043086", "GO:0051336")
query_1	FALSE	1	39	26	2	0.0769231	0.0512821	GO:0051567	GO:BP	histone H3-K9 methylation	21100	15935	c("GO:0034968", "GO:0061647")
query_1	FALSE	1	38	26	1	0.0384615	0.0263158	GO:0051569	GO:BP	regulation of histone H3-K4 methylation	21100	15937	c("GO:0031060", "GO:0051568")
query_1	FALSE	1	309	26	1	0.0384615	0.00323625	GO:0055074	GO:BP	calcium ion homeostasis	21100	16779	c("GO:0055065", "GO:0072507")
query_1	FALSE	1	1527	26	6	0.230769	0.00392927	GO:0000003	GO:BP	reproduction	21100	3	GO:0008150
query_1	FALSE	1	658	26	1	0.0384615	0.00151976	GO:0055082	GO:BP	cellular chemical homeostasis	21100	16786	c("GO:0019725", "GO:0048878")
query_1	FALSE	1	294	26	1	0.0384615	0.00340136	GO:0060485	GO:BP	mesenchyme development	21100	17250	c("GO:0009888", "GO:0048513")
query_1	FALSE	1	22	26	1	0.0384615	0.0454545	GO:0060487	GO:BP	lung epithelial cell differentiation	21100	17252	c("GO:0030855", "GO:0060428", "GO:0060479")
query_1	FALSE	1	196	26	1	0.0384615	0.00510204	GO:0060491	GO:BP	regulation of cell projection assembly	21100	17256	c("GO:0030031", "GO:0031344", "GO:0044087")
query_1	FALSE	1	3	26	1	0.0384615	0.333333	GO:0060523	GO:BP	prostate epithelial cord elongation	21100	17288	c("GO:0060442", "GO:0060602", "GO:0060737", "GO:0060740")
query_1	FALSE	1	6	26	1	0.0384615	0.166667	GO:0060526	GO:BP	prostate glandular acinus morphogenesis	21100	17291	c("GO:0060525", "GO:0060740")
query_1	FALSE	1	6	26	1	0.0384615	0.166667	GO:0060527	GO:BP	prostate epithelial cord arborization involved in prostate glandular acinus morphogenesis	21100	17292	c("GO:0060442", "GO:0060526")
query_1	FALSE	1	3	26	1	0.0384615	0.333333	GO:0060528	GO:BP	secretory columnal luminar epithelial cell differentiation involved in prostate glandular acinus development	21100	17293	c("GO:0002067", "GO:0060525", "GO:0060742")
query_1	FALSE	1	205	26	1	0.0384615	0.00487805	GO:0060541	GO:BP	respiratory system development	21100	17306	GO:0048731
query_1	FALSE	1	983	26	1	0.0384615	0.00101729	GO:0060548	GO:BP	negative regulation of cell death	21100	17313	c("GO:0008219", "GO:0010941", "GO:0048523")
query_1	FALSE	1	237	26	1	0.0384615	0.00421941	GO:0060560	GO:BP	developmental growth involved in morphogenesis	21100	17322	c("GO:0009653", "GO:0048589")
query_1	FALSE	1	331	26	2	0.0769231	0.0060423	GO:0060562	GO:BP	epithelial tube morphogenesis	21100	17324	c("GO:0002009", "GO:0035239")
query_1	FALSE	1	19	26	1	0.0384615	0.0526316	GO:0060602	GO:BP	branch elongation of an epithelium	21100	17361	c("GO:0003401", "GO:0061138")
query_1	FALSE	1	32	26	1	0.0384615	0.03125	GO:0060603	GO:BP	mammary gland duct morphogenesis	21100	17362	c("GO:0060443", "GO:0060562", "GO:0061180")
query_1	FALSE	1	531	26	1	0.0384615	0.00188324	GO:0060627	GO:BP	regulation of vesicle-mediated transport	21100	17385	c("GO:0016192", "GO:0050794", "GO:0051049")
query_1	FALSE	1	6	26	1	0.0384615	0.166667	GO:0060684	GO:BP	epithelial-mesenchymal cell signaling	21100	17442	GO:0007267
query_1	FALSE	1	5	26	1	0.0384615	0.2	GO:0060687	GO:BP	regulation of branching involved in prostate gland morphogenesis	21100	17445	c("GO:0060442", "GO:0060688", "GO:1905330", "GO:2000241")
query_1	FALSE	1	52	26	1	0.0384615	0.0192308	GO:0060688	GO:BP	regulation of morphogenesis of a branching structure	21100	17446	c("GO:0001763", "GO:0022603", "GO:0051239")
query_1	FALSE	1	12	26	1	0.0384615	0.0833333	GO:0060736	GO:BP	prostate gland growth	21100	17490	c("GO:0003006", "GO:0030850", "GO:0035265")
query_1	FALSE	1	4	26	1	0.0384615	0.25	GO:0060737	GO:BP	prostate gland morphogenetic growth	21100	17491	c("GO:0060512", "GO:0060560", "GO:0060736")
query_1	FALSE	1	2	26	1	0.0384615	0.5	GO:0060738	GO:BP	epithelial-mesenchymal signaling involved in prostate gland development	21100	17492	c("GO:0022414", "GO:0030850", "GO:0060684")
query_1	FALSE	1	3	26	1	0.0384615	0.333333	GO:0060741	GO:BP	prostate gland stromal morphogenesis	21100	17495	c("GO:0003006", "GO:0009653", "GO:0060512", "GO:0061448")
query_1	FALSE	1	11	26	1	0.0384615	0.0909091	GO:0060742	GO:BP	epithelial cell differentiation involved in prostate gland development	21100	17496	c("GO:0003006", "GO:0030850", "GO:0030855")
query_1	FALSE	1	3	26	1	0.0384615	0.333333	GO:0060743	GO:BP	epithelial cell maturation involved in prostate gland development	21100	17497	c("GO:0002070", "GO:0003006", "GO:0060742")
query_1	FALSE	1	7	26	1	0.0384615	0.142857	GO:0060745	GO:BP	mammary gland branching involved in pregnancy	21100	17499	c("GO:0003006", "GO:0060135", "GO:0060444")
query_1	FALSE	1	21	26	1	0.0384615	0.047619	GO:0060749	GO:BP	mammary gland alveolus development	21100	17503	c("GO:0048856", "GO:0061377")
query_1	FALSE	1	4	26	1	0.0384615	0.25	GO:0060750	GO:BP	epithelial cell proliferation involved in mammary gland duct elongation	21100	17504	c("GO:0033598", "GO:0060751")
query_1	FALSE	1	5	26	1	0.0384615	0.2	GO:0060751	GO:BP	branch elongation involved in mammary gland duct branching	21100	17505	c("GO:0060444", "GO:0060602")
query_1	FALSE	1	2	26	1	0.0384615	0.5	GO:0060830	GO:BP	ciliary receptor clustering involved in smoothened signaling pathway	21100	17584	c("GO:0007224", "GO:0043113")
query_1	FALSE	1	13	26	1	0.0384615	0.0769231	GO:0060831	GO:BP	smoothened signaling pathway involved in dorsal/ventral neural tube patterning	21100	17585	c("GO:0007224", "GO:0021904")
query_1	FALSE	1	23	26	1	0.0384615	0.0434783	GO:0060479	GO:BP	lung cell differentiation	21100	17244	c("GO:0030154", "GO:0030324")
query_1	FALSE	1	23	26	1	0.0384615	0.0434783	GO:0060444	GO:BP	branching involved in mammary gland duct morphogenesis	21100	17210	c("GO:0048754", "GO:0060603")
query_1	FALSE	1	46	26	1	0.0384615	0.0217391	GO:0060443	GO:BP	mammary gland morphogenesis	21100	17209	c("GO:0022612", "GO:0030879")
query_1	FALSE	1	12	26	1	0.0384615	0.0833333	GO:0060442	GO:BP	branching involved in prostate gland morphogenesis	21100	17208	c("GO:0060740", "GO:0061138")
query_1	FALSE	1	1528	26	1	0.0384615	0.00065445	GO:0055085	GO:BP	transmembrane transport	21100	16788	c("GO:0006810", "GO:0009987")
query_1	FALSE	1	42	26	1	0.0384615	0.0238095	GO:0051123	GO:BP	RNA polymerase II preinitiation complex assembly	21100	15593	c("GO:0006367", "GO:0070897")
query_1	FALSE	1	562	26	1	0.0384615	0.00177936	GO:0055086	GO:BP	nucleobase-containing small molecule metabolic process	21100	16789	c("GO:0006139", "GO:0044281")
query_1	FALSE	1	143	26	1	0.0384615	0.00699301	GO:0055123	GO:BP	digestive system development	21100	16815	GO:0048731
query_1	FALSE	1	22	26	1	0.0384615	0.0454545	GO:0060065	GO:BP	uterus development	21100	16881	c("GO:0048513", "GO:0048608")
query_1	FALSE	1	10	26	1	0.0384615	0.1	GO:0060068	GO:BP	vagina development	21100	16884	GO:0030540
query_1	FALSE	1	57	26	2	0.0769231	0.0350877	GO:0060135	GO:BP	maternal process involved in female pregnancy	21100	16935	c("GO:0007565", "GO:0048609")
query_1	FALSE	1	42	26	1	0.0384615	0.0238095	GO:0060147	GO:BP	regulation of post-transcriptional gene silencing	21100	16946	c("GO:0010468", "GO:0016441")
query_1	FALSE	1	17	26	1	0.0384615	0.0588235	GO:0060149	GO:BP	negative regulation of post-transcriptional gene silencing	21100	16948	c("GO:0010628", "GO:0016441", "GO:0048519", "GO:0060147")
query_1	FALSE	1	178	26	1	0.0384615	0.00561798	GO:0060173	GO:BP	limb development	21100	16969	GO:0048736
query_1	FALSE	1	88	26	1	0.0384615	0.0113636	GO:0060191	GO:BP	regulation of lipase activity	21100	16983	GO:0051336
query_1	FALSE	1	67	26	1	0.0384615	0.0149254	GO:0060193	GO:BP	positive regulation of lipase activity	21100	16985	c("GO:0051345", "GO:0060191")
query_1	FALSE	1	322	26	2	0.0769231	0.00621118	GO:0060249	GO:BP	anatomical structure homeostasis	21100	17026	GO:0042592
query_1	FALSE	1	6787	26	10	0.384615	0.00147341	GO:0060255	GO:BP	regulation of macromolecule metabolic process	21100	17032	c("GO:0019222", "GO:0043170")
query_1	FALSE	1	587	26	1	0.0384615	0.00170358	GO:0055080	GO:BP	cation homeostasis	21100	16784	GO:0050801
query_1	FALSE	1	48	26	1	0.0384615	0.0208333	GO:0060260	GO:BP	regulation of transcription initiation from RNA polymerase II promoter	21100	17037	c("GO:0006357", "GO:0006367", "GO:2000142")
query_1	FALSE	1	356	26	3	0.115385	0.00842697	GO:0060271	GO:BP	cilium assembly	21100	17048	c("GO:0044782", "GO:0070925", "GO:0120031")
query_1	FALSE	1	153	26	1	0.0384615	0.00653595	GO:0060285	GO:BP	cilium-dependent cell motility	21100	17062	GO:0001539
query_1	FALSE	1	140	26	1	0.0384615	0.00714286	GO:0060294	GO:BP	cilium movement involved in cell motility	21100	17070	c("GO:0003341", "GO:0060285")
query_1	FALSE	1	809	26	2	0.0769231	0.00247219	GO:0060322	GO:BP	head development	21100	17097	GO:0048856
query_1	FALSE	1	741	26	1	0.0384615	0.00134953	GO:0060341	GO:BP	regulation of cellular localization	21100	17116	c("GO:0032879", "GO:0050794", "GO:0051641")
query_1	FALSE	1	231	26	1	0.0384615	0.004329	GO:0060348	GO:BP	bone development	21100	17122	c("GO:0001501", "GO:0048513")
query_1	FALSE	1	101	26	1	0.0384615	0.00990099	GO:0060349	GO:BP	bone morphogenesis	21100	17123	c("GO:0009887", "GO:0048705", "GO:0060348")
query_1	FALSE	1	58	26	1	0.0384615	0.0172414	GO:0060350	GO:BP	endochondral bone morphogenesis	21100	17124	GO:0060349
query_1	FALSE	1	32	26	1	0.0384615	0.03125	GO:0060351	GO:BP	cartilage development involved in endochondral bone morphogenesis	21100	17125	c("GO:0051216", "GO:0060350")
query_1	FALSE	1	50	26	1	0.0384615	0.02	GO:0060425	GO:BP	lung morphogenesis	21100	17191	c("GO:0009887", "GO:0030324")
query_1	FALSE	1	36	26	1	0.0384615	0.0277778	GO:0060428	GO:BP	lung epithelium development	21100	17194	c("GO:0030324", "GO:0060429")
query_1	FALSE	1	1180	26	3	0.115385	0.00254237	GO:0060429	GO:BP	epithelium development	21100	17195	GO:0009888
query_1	FALSE	1	8	26	1	0.0384615	0.125	GO:0060430	GO:BP	lung saccule development	21100	17196	c("GO:0048286", "GO:0048856")
query_1	FALSE	1	29	26	1	0.0384615	0.0344828	GO:0060441	GO:BP	epithelial tube branching involved in lung morphogenesis	21100	17207	c("GO:0048754", "GO:0060425")
query_1	FALSE	1	40	26	1	0.0384615	0.025	GO:0060261	GO:BP	positive regulation of transcription initiation from RNA polymerase II promoter	21100	17038	c("GO:0006367", "GO:0045944", "GO:0060260", "GO:2000144")
query_1	FALSE	1	1268	26	3	0.115385	0.00236593	GO:0051094	GO:BP	positive regulation of developmental process	21100	15571	c("GO:0032502", "GO:0048518", "GO:0050793")
query_1	FALSE	1	896	26	1	0.0384615	0.00111607	GO:0051050	GO:BP	positive regulation of transport	21100	15541	c("GO:0006810", "GO:0048518", "GO:0051049")
query_1	FALSE	1	266	26	3	0.115385	0.0112782	GO:0051091	GO:BP	positive regulation of DNA-binding transcription factor activity	21100	15568	c("GO:0044093", "GO:0051090")
query_1	FALSE	1	41	26	1	0.0384615	0.0243902	GO:0046464	GO:BP	acylglycerol catabolic process	21100	14144	c("GO:0006639", "GO:0046461", "GO:0046503")
query_1	FALSE	1	8165	26	8	0.307692	0.000979792	GO:0046483	GO:BP	heterocycle metabolic process	21100	14160	GO:0044237
query_1	FALSE	1	399	26	1	0.0384615	0.00250627	GO:0046486	GO:BP	glycerolipid metabolic process	21100	14163	GO:0044255
query_1	FALSE	1	68	26	1	0.0384615	0.0147059	GO:0046503	GO:BP	glycerolipid catabolic process	21100	14179	c("GO:0044242", "GO:0046486")
query_1	FALSE	1	108	26	1	0.0384615	0.00925926	GO:0046545	GO:BP	development of primary female sexual characteristics	21100	14204	c("GO:0045137", "GO:0046660")
query_1	FALSE	1	142	26	2	0.0769231	0.0140845	GO:0046546	GO:BP	development of primary male sexual characteristics	21100	14205	c("GO:0045137", "GO:0046661")
query_1	FALSE	1	158	26	1	0.0384615	0.00632911	GO:0046631	GO:BP	alpha-beta T cell activation	21100	14247	GO:0042110
query_1	FALSE	1	112	26	1	0.0384615	0.00892857	GO:0046632	GO:BP	alpha-beta T cell differentiation	21100	14248	c("GO:0030217", "GO:0046631")
query_1	FALSE	1	103	26	1	0.0384615	0.00970874	GO:0046634	GO:BP	regulation of alpha-beta T cell activation	21100	14250	c("GO:0046631", "GO:0050863")
query_1	FALSE	1	67	26	1	0.0384615	0.0149254	GO:0046635	GO:BP	positive regulation of alpha-beta T cell activation	21100	14251	c("GO:0046631", "GO:0046634", "GO:0050870")
query_1	FALSE	1	66	26	1	0.0384615	0.0151515	GO:0046637	GO:BP	regulation of alpha-beta T cell differentiation	21100	14253	c("GO:0045580", "GO:0046632", "GO:0046634")
query_1	FALSE	1	49	26	1	0.0384615	0.0204082	GO:0046638	GO:BP	positive regulation of alpha-beta T cell differentiation	21100	14254	c("GO:0045582", "GO:0046632", "GO:0046635", "GO:0046637")
query_1	FALSE	1	794	26	1	0.0384615	0.00125945	GO:0046649	GO:BP	lymphocyte activation	21100	14265	GO:0045321
query_1	FALSE	1	123	26	1	0.0384615	0.00813008	GO:0046660	GO:BP	female sex differentiation	21100	14272	c("GO:0007275", "GO:0007548")
query_1	FALSE	1	14	26	1	0.0384615	0.0714286	GO:0046462	GO:BP	monoacylglycerol metabolic process	21100	14142	GO:0006639
query_1	FALSE	1	165	26	2	0.0769231	0.0121212	GO:0046661	GO:BP	male sex differentiation	21100	14273	c("GO:0007275", "GO:0007548")
query_1	FALSE	1	22	26	1	0.0384615	0.0454545	GO:0046885	GO:BP	regulation of hormone biosynthetic process	21100	14424	c("GO:0031326", "GO:0032350", "GO:0042446")
query_1	FALSE	1	923	26	1	0.0384615	0.00108342	GO:0046903	GO:BP	secretion	21100	14441	GO:0006810
query_1	FALSE	1	1766	26	3	0.115385	0.00169875	GO:0046907	GO:BP	intracellular transport	21100	14442	c("GO:0006810", "GO:0051641", "GO:0051649")
query_1	FALSE	1	102	26	1	0.0384615	0.00980392	GO:0046939	GO:BP	nucleotide phosphorylation	21100	14456	GO:0016310
query_1	FALSE	1	82	26	1	0.0384615	0.0121951	GO:0048002	GO:BP	antigen processing and presentation of peptide antigen	21100	14483	GO:0019882
query_1	FALSE	1	176	26	1	0.0384615	0.00568182	GO:0048015	GO:BP	phosphatidylinositol-mediated signaling	21100	14494	GO:0048017
query_1	FALSE	1	180	26	1	0.0384615	0.00555556	GO:0048017	GO:BP	inositol lipid-mediated signaling	21100	14496	GO:0035556
query_1	FALSE	1	82	26	1	0.0384615	0.0121951	GO:0048144	GO:BP	fibroblast proliferation	21100	14573	GO:0008283
query_1	FALSE	1	80	26	1	0.0384615	0.0125	GO:0048145	GO:BP	regulation of fibroblast proliferation	21100	14574	c("GO:0042127", "GO:0048144")
query_1	FALSE	1	49	26	1	0.0384615	0.0204082	GO:0048146	GO:BP	positive regulation of fibroblast proliferation	21100	14575	c("GO:0008284", "GO:0048144", "GO:0048145")
query_1	FALSE	1	592	26	1	0.0384615	0.00168919	GO:0048232	GO:BP	male gamete generation	21100	14628	GO:0007276
query_1	FALSE	1	46	26	1	0.0384615	0.0217391	GO:0048286	GO:BP	lung alveolus development	21100	14663	c("GO:0030324", "GO:0048856")
query_1	FALSE	1	2094	26	3	0.115385	0.00143266	GO:0048468	GO:BP	cell development	21100	14805	c("GO:0030154", "GO:0048856", "GO:0048869")
query_1	FALSE	1	185	26	1	0.0384615	0.00540541	GO:0048469	GO:BP	cell maturation	21100	14806	c("GO:0048468", "GO:0048869", "GO:0071695")
query_1	FALSE	1	23	26	1	0.0384615	0.0434783	GO:0046697	GO:BP	decidualization	21100	14304	c("GO:0001893", "GO:0003006", "GO:0009888")
query_1	FALSE	1	62	26	1	0.0384615	0.016129	GO:0048488	GO:BP	synaptic vesicle endocytosis	21100	14818	c("GO:0036465", "GO:0140238")
query_1	FALSE	1	41	26	1	0.0384615	0.0243902	GO:0046461	GO:BP	neutral lipid catabolic process	21100	14141	c("GO:0006638", "GO:0044242")
query_1	FALSE	1	189	26	1	0.0384615	0.00529101	GO:0046390	GO:BP	ribose phosphate biosynthetic process	21100	14086	c("GO:0019693", "GO:0090407", "GO:1901137")
query_1	FALSE	1	660	26	2	0.0769231	0.0030303	GO:0045596	GO:BP	negative regulation of cell differentiation	21100	13328	c("GO:0030154", "GO:0045595", "GO:0048523", "GO:0051093")
query_1	FALSE	1	840	26	3	0.115385	0.00357143	GO:0045597	GO:BP	positive regulation of cell differentiation	21100	13329	c("GO:0030154", "GO:0045595", "GO:0048522", "GO:0051094")
query_1	FALSE	1	185	26	1	0.0384615	0.00540541	GO:0045619	GO:BP	regulation of lymphocyte differentiation	21100	13351	c("GO:0030098", "GO:0051249", "GO:1902105")
query_1	FALSE	1	109	26	1	0.0384615	0.00917431	GO:0045621	GO:BP	positive regulation of lymphocyte differentiation	21100	13353	c("GO:0030098", "GO:0045619", "GO:0051251", "GO:1902107")
query_1	FALSE	1	37	26	1	0.0384615	0.027027	GO:0045622	GO:BP	regulation of T-helper cell differentiation	21100	13354	c("GO:0002697", "GO:0042093", "GO:0043370", "GO:0050776")
query_1	FALSE	1	21	26	1	0.0384615	0.047619	GO:0045624	GO:BP	positive regulation of T-helper cell differentiation	21100	13356	c("GO:0002699", "GO:0042093", "GO:0043372", "GO:0045622", "GO:0050778")
query_1	FALSE	1	194	26	1	0.0384615	0.00515464	GO:0045664	GO:BP	regulation of neuron differentiation	21100	13396	c("GO:0030182", "GO:0045595")
query_1	FALSE	1	90	26	1	0.0384615	0.0111111	GO:0045666	GO:BP	positive regulation of neuron differentiation	21100	13398	c("GO:0030182", "GO:0045597", "GO:0045664")
query_1	FALSE	1	126	26	1	0.0384615	0.00793651	GO:0045667	GO:BP	regulation of osteoblast differentiation	21100	13399	c("GO:0001649", "GO:0045595")
query_1	FALSE	1	68	26	1	0.0384615	0.0147059	GO:0045669	GO:BP	positive regulation of osteoblast differentiation	21100	13401	c("GO:0001649", "GO:0045597", "GO:0045667")
query_1	FALSE	1	26	26	1	0.0384615	0.0384615	GO:0045724	GO:BP	positive regulation of cilium assembly	21100	13452	c("GO:0060271", "GO:0120034", "GO:1902017", "GO:1902117")
query_1	FALSE	1	51	26	1	0.0384615	0.0196078	GO:0045778	GO:BP	positive regulation of ossification	21100	13504	c("GO:0001503", "GO:0030278", "GO:0051240")
query_1	FALSE	1	442	26	2	0.0769231	0.00452489	GO:0045785	GO:BP	positive regulation of cell adhesion	21100	13511	c("GO:0007155", "GO:0030155", "GO:0048522")
query_1	FALSE	1	347	26	1	0.0384615	0.00288184	GO:0045787	GO:BP	positive regulation of cell cycle	21100	13513	c("GO:0007049", "GO:0048522", "GO:0051726")
query_1	FALSE	1	239	26	1	0.0384615	0.0041841	GO:0046395	GO:BP	carboxylic acid catabolic process	21100	14090	c("GO:0016054", "GO:0019752")
query_1	FALSE	1	339	26	1	0.0384615	0.00294985	GO:0045861	GO:BP	negative regulation of proteolysis	21100	13575	c("GO:0006508", "GO:0030162", "GO:0032269")
query_1	FALSE	1	1636	26	4	0.153846	0.00244499	GO:0045893	GO:BP	positive regulation of transcription, DNA-templated	21100	13603	c("GO:0006351", "GO:0006355", "GO:1903508")
query_1	FALSE	1	8	26	1	0.0384615	0.125	GO:0045898	GO:BP	regulation of RNA polymerase II transcription preinitiation complex assembly	21100	13608	c("GO:0043254", "GO:0051123", "GO:0060260")
query_1	FALSE	1	5	26	1	0.0384615	0.2	GO:0045899	GO:BP	positive regulation of RNA polymerase II transcription preinitiation complex assembly	21100	13609	c("GO:0031334", "GO:0045898", "GO:0051123", "GO:0060261")
query_1	FALSE	1	32	26	1	0.0384615	0.03125	GO:0045907	GO:BP	positive regulation of vasoconstriction	21100	13617	c("GO:0019229", "GO:0042310", "GO:0051240")
query_1	FALSE	1	84	26	1	0.0384615	0.0119048	GO:0045921	GO:BP	positive regulation of exocytosis	21100	13629	c("GO:0006887", "GO:0017157", "GO:1903532")
query_1	FALSE	1	245	26	1	0.0384615	0.00408163	GO:0045926	GO:BP	negative regulation of growth	21100	13634	c("GO:0040007", "GO:0040008", "GO:0048519")
query_1	FALSE	1	119	26	1	0.0384615	0.00840336	GO:0045931	GO:BP	positive regulation of mitotic cell cycle	21100	13639	c("GO:0000278", "GO:0007346", "GO:0045787")
query_1	FALSE	1	1533	26	5	0.192308	0.00326158	GO:0045934	GO:BP	negative regulation of nucleobase-containing compound metabolic process	21100	13642	c("GO:0006139", "GO:0019219", "GO:0031324", "GO:0051172")
query_1	FALSE	1	1976	26	4	0.153846	0.00202429	GO:0045935	GO:BP	positive regulation of nucleobase-containing compound metabolic process	21100	13643	c("GO:0006139", "GO:0019219", "GO:0031325", "GO:0051173")
query_1	FALSE	1	895	26	1	0.0384615	0.00111732	GO:0045937	GO:BP	positive regulation of phosphate metabolic process	21100	13645	c("GO:0006796", "GO:0010562", "GO:0019220")
query_1	FALSE	1	1211	26	4	0.153846	0.00330306	GO:0045944	GO:BP	positive regulation of transcription by RNA polymerase II	21100	13651	c("GO:0006357", "GO:0006366", "GO:0045893")
query_1	FALSE	1	16	26	1	0.0384615	0.0625	GO:0046036	GO:BP	CTP metabolic process	21100	13736	c("GO:0009208", "GO:0009218")
query_1	FALSE	1	25	26	1	0.0384615	0.04	GO:0046039	GO:BP	GTP metabolic process	21100	13739	c("GO:0009150", "GO:0009205")
query_1	FALSE	1	12	26	1	0.0384615	0.0833333	GO:0046051	GO:BP	UTP metabolic process	21100	13751	c("GO:0009208", "GO:0009218")
query_1	FALSE	1	1293	26	5	0.192308	0.00386698	GO:0045892	GO:BP	negative regulation of transcription, DNA-templated	21100	13602	c("GO:0006351", "GO:0006355", "GO:1903507")
query_1	FALSE	1	302	26	1	0.0384615	0.00331126	GO:0048511	GO:BP	rhythmic process	21100	14833	GO:0008150
query_1	FALSE	1	3513	26	9	0.346154	0.00256191	GO:0048513	GO:BP	animal organ development	21100	14835	GO:0048856
query_1	FALSE	1	6224	26	11	0.423077	0.00176735	GO:0048518	GO:BP	positive regulation of biological process	21100	14840	c("GO:0008150", "GO:0050789")
query_1	FALSE	1	535	26	2	0.0769231	0.00373832	GO:0048871	GO:BP	multicellular organismal homeostasis	21100	15160	c("GO:0032501", "GO:0042592")
query_1	FALSE	1	1023	26	2	0.0769231	0.00195503	GO:0048878	GO:BP	chemical homeostasis	21100	15167	GO:0042592
query_1	FALSE	1	400	26	1	0.0384615	0.0025	GO:0048880	GO:BP	sensory system development	21100	15168	GO:0048731
query_1	FALSE	1	402	26	1	0.0384615	0.00248756	GO:0050673	GO:BP	epithelial cell proliferation	21100	15259	GO:0008283
query_1	FALSE	1	357	26	1	0.0384615	0.00280112	GO:0050727	GO:BP	regulation of inflammatory response	21100	15278	c("GO:0006954", "GO:0031347", "GO:0032101")
query_1	FALSE	1	255	26	1	0.0384615	0.00392157	GO:0050730	GO:BP	regulation of peptidyl-tyrosine phosphorylation	21100	15281	c("GO:0001932", "GO:0018108")
query_1	FALSE	1	188	26	1	0.0384615	0.00531915	GO:0050731	GO:BP	positive regulation of peptidyl-tyrosine phosphorylation	21100	15282	c("GO:0001934", "GO:0018108", "GO:0050730")
query_1	FALSE	1	903	26	2	0.0769231	0.00221484	GO:0050776	GO:BP	regulation of immune response	21100	15313	c("GO:0002682", "GO:0006955", "GO:0048583")
query_1	FALSE	1	600	26	1	0.0384615	0.00166667	GO:0050778	GO:BP	positive regulation of immune response	21100	15315	c("GO:0002684", "GO:0006955", "GO:0048584", "GO:0050776")
query_1	FALSE	1	12276	26	21	0.807692	0.00171065	GO:0050789	GO:BP	regulation of biological process	21100	15321	c("GO:0008150", "GO:0065007")
query_1	FALSE	1	2345	26	3	0.115385	0.00127932	GO:0050790	GO:BP	regulation of catalytic activity	21100	15322	GO:0065009
query_1	FALSE	1	2425	26	5	0.192308	0.00206186	GO:0050793	GO:BP	regulation of developmental process	21100	15324	c("GO:0032502", "GO:0050789")
query_1	FALSE	1	11193	26	20	0.769231	0.00178683	GO:0050794	GO:BP	regulation of cellular process	21100	15325	c("GO:0009987", "GO:0050789")
query_1	FALSE	1	610	26	1	0.0384615	0.00163934	GO:0050801	GO:BP	ion homeostasis	21100	15330	GO:0048878
query_1	FALSE	1	1655	26	2	0.0769231	0.00120846	GO:0048870	GO:BP	cell motility	21100	15159	c("GO:0006928", "GO:0040011", "GO:0051674")
query_1	FALSE	1	342	26	1	0.0384615	0.00292398	GO:0050863	GO:BP	regulation of T cell activation	21100	15382	c("GO:0042110", "GO:0051249")
query_1	FALSE	1	430	26	1	0.0384615	0.00232558	GO:0050867	GO:BP	positive regulation of cell activation	21100	15386	c("GO:0001775", "GO:0048522", "GO:0050865")
query_1	FALSE	1	221	26	1	0.0384615	0.00452489	GO:0050870	GO:BP	positive regulation of T cell activation	21100	15389	c("GO:0042110", "GO:0050863", "GO:0051251", "GO:1903039")
query_1	FALSE	1	1487	26	2	0.0769231	0.00134499	GO:0050877	GO:BP	nervous system process	21100	15393	GO:0003008
query_1	FALSE	1	8885	26	12	0.461538	0.00135059	GO:0050896	GO:BP	response to stimulus	21100	15410	GO:0008150
query_1	FALSE	1	512	26	1	0.0384615	0.00195312	GO:0050906	GO:BP	detection of stimulus involved in sensory perception	21100	15419	c("GO:0007600", "GO:0051606")
query_1	FALSE	1	445	26	1	0.0384615	0.00224719	GO:0050907	GO:BP	detection of chemical stimulus involved in sensory perception	21100	15420	c("GO:0007606", "GO:0009593", "GO:0050906")
query_1	FALSE	1	68	26	1	0.0384615	0.0147059	GO:0050909	GO:BP	sensory perception of taste	21100	15422	GO:0007606
query_1	FALSE	1	43	26	1	0.0384615	0.0232558	GO:0050912	GO:BP	detection of chemical stimulus involved in sensory perception of taste	21100	15425	c("GO:0050907", "GO:0050909")
query_1	FALSE	1	41	26	1	0.0384615	0.0243902	GO:0050913	GO:BP	sensory perception of bitter taste	21100	15426	GO:0050909
query_1	FALSE	1	603	26	1	0.0384615	0.00165837	GO:0051046	GO:BP	regulation of secretion	21100	15537	c("GO:0046903", "GO:0051049")
query_1	FALSE	1	303	26	1	0.0384615	0.00330033	GO:0051047	GO:BP	positive regulation of secretion	21100	15538	c("GO:0046903", "GO:0051046", "GO:0051050")
query_1	FALSE	1	1724	26	2	0.0769231	0.00116009	GO:0051049	GO:BP	regulation of transport	21100	15540	c("GO:0006810", "GO:0032879")
query_1	FALSE	1	39	26	1	0.0384615	0.025641	GO:0060964	GO:BP	regulation of miRNA-mediated gene silencing	21100	17715	c("GO:0035195", "GO:1900368")
query_1	FALSE	1	435	26	3	0.115385	0.00689655	GO:0051090	GO:BP	regulation of DNA-binding transcription factor activity	21100	15567	c("GO:0006355", "GO:0065009")
query_1	FALSE	1	671	26	1	0.0384615	0.00149031	GO:0050865	GO:BP	regulation of cell activation	21100	15384	c("GO:0001775", "GO:0050794")
query_1	FALSE	1	4184	26	6	0.230769	0.00143403	GO:0048869	GO:BP	cellular developmental process	21100	15158	c("GO:0009987", "GO:0032502")
query_1	FALSE	1	231	26	2	0.0769231	0.00865801	GO:0048863	GO:BP	stem cell differentiation	21100	15152	GO:0030154
query_1	FALSE	1	5754	26	9	0.346154	0.00156413	GO:0048856	GO:BP	anatomical structure development	21100	15146	GO:0032502
query_1	FALSE	1	5876	26	11	0.423077	0.00187202	GO:0048519	GO:BP	negative regulation of biological process	21100	14841	c("GO:0008150", "GO:0050789")
query_1	FALSE	1	5687	26	10	0.384615	0.0017584	GO:0048522	GO:BP	positive regulation of cellular process	21100	14844	c("GO:0009987", "GO:0048518", "GO:0050794")
query_1	FALSE	1	4856	26	10	0.384615	0.00205931	GO:0048523	GO:BP	negative regulation of cellular process	21100	14845	c("GO:0009987", "GO:0048519", "GO:0050794")
query_1	FALSE	1	938	26	2	0.0769231	0.0021322	GO:0048534	GO:BP	hematopoietic or lymphoid organ development	21100	14854	c("GO:0002520", "GO:0048513")
query_1	FALSE	1	332	26	2	0.0769231	0.0060241	GO:0048545	GO:BP	response to steroid hormone	21100	14865	c("GO:0009725", "GO:0014070", "GO:0033993")
query_1	FALSE	1	301	26	1	0.0384615	0.00332226	GO:0048562	GO:BP	embryonic organ morphogenesis	21100	14874	c("GO:0009887", "GO:0048568", "GO:0048598")
query_1	FALSE	1	455	26	1	0.0384615	0.0021978	GO:0048568	GO:BP	embryonic organ development	21100	14880	c("GO:0009790", "GO:0048513")
query_1	FALSE	1	3895	26	6	0.230769	0.00154044	GO:0048583	GO:BP	regulation of response to stimulus	21100	14895	c("GO:0050789", "GO:0050896")
query_1	FALSE	1	2169	26	4	0.153846	0.00184417	GO:0048584	GO:BP	positive regulation of response to stimulus	21100	14896	c("GO:0048518", "GO:0048583", "GO:0050896")
query_1	FALSE	1	1599	26	1	0.0384615	0.000625391	GO:0048585	GO:BP	negative regulation of response to stimulus	21100	14897	c("GO:0048519", "GO:0048583", "GO:0050896")
query_1	FALSE	1	639	26	2	0.0769231	0.00312989	GO:0048589	GO:BP	developmental growth	21100	14901	c("GO:0032502", "GO:0040007")
query_1	FALSE	1	609	26	1	0.0384615	0.00164204	GO:0048598	GO:BP	embryonic morphogenesis	21100	14906	c("GO:0009653", "GO:0009790")
query_1	FALSE	1	876	26	3	0.115385	0.00342466	GO:0048609	GO:BP	multicellular organismal reproductive process	21100	14911	c("GO:0022414", "GO:0032504")
query_1	FALSE	1	319	26	1	0.0384615	0.0031348	GO:0048638	GO:BP	regulation of developmental growth	21100	14939	c("GO:0040008", "GO:0048589", "GO:0050793")
query_1	FALSE	1	105	26	1	0.0384615	0.00952381	GO:0048640	GO:BP	negative regulation of developmental growth	21100	14941	c("GO:0045926", "GO:0048589", "GO:0048638", "GO:0051093")
query_1	FALSE	1	1134	26	1	0.0384615	0.000881834	GO:0048646	GO:BP	anatomical structure formation involved in morphogenesis	21100	14947	c("GO:0009653", "GO:0032502")
query_1	FALSE	1	61	26	1	0.0384615	0.0163934	GO:0048663	GO:BP	neuron fate commitment	21100	14964	c("GO:0030182", "GO:0045165")
query_1	FALSE	1	47	26	1	0.0384615	0.0212766	GO:0048806	GO:BP	genitalia development	21100	15097	c("GO:0007548", "GO:0048513", "GO:0048608")
query_1	FALSE	1	235	26	1	0.0384615	0.00425532	GO:0048762	GO:BP	mesenchymal cell differentiation	21100	15058	c("GO:0030154", "GO:0060485")
query_1	FALSE	1	152	26	2	0.0769231	0.0131579	GO:0048754	GO:BP	branching morphogenesis of an epithelial tube	21100	15050	c("GO:0035239", "GO:0060562", "GO:0061138")
query_1	FALSE	1	178	26	1	0.0384615	0.00561798	GO:0048736	GO:BP	appendage development	21100	15036	c("GO:0007275", "GO:0048856")
query_1	FALSE	1	435	26	2	0.0769231	0.0045977	GO:0048732	GO:BP	gland development	21100	15032	GO:0048513
query_1	FALSE	1	4313	26	9	0.346154	0.00208671	GO:0048731	GO:BP	system development	21100	15031	c("GO:0007275", "GO:0048856")
query_1	FALSE	1	877	26	3	0.115385	0.00342075	GO:0051093	GO:BP	negative regulation of developmental process	21100	15570	c("GO:0032502", "GO:0048519", "GO:0050793")
query_1	FALSE	1	640	26	2	0.0769231	0.003125	GO:0048729	GO:BP	tissue morphogenesis	21100	15029	c("GO:0009653", "GO:0009888")
query_1	FALSE	1	231	26	2	0.0769231	0.00865801	GO:0048705	GO:BP	skeletal system morphogenesis	21100	15005	c("GO:0001501", "GO:0009887")
query_1	FALSE	1	94	26	1	0.0384615	0.0106383	GO:0048704	GO:BP	embryonic skeletal system morphogenesis	21100	15004	c("GO:0048562", "GO:0048705", "GO:0048706")
query_1	FALSE	1	45	26	1	0.0384615	0.0222222	GO:0048701	GO:BP	embryonic cranial skeleton morphogenesis	21100	15001	c("GO:0048704", "GO:1904888")
query_1	FALSE	1	1436	26	2	0.0769231	0.00139276	GO:0048699	GO:BP	generation of neurons	21100	14999	GO:0022008
query_1	FALSE	1	1108	26	1	0.0384615	0.000902527	GO:0048666	GO:BP	neuron development	21100	14967	c("GO:0030182", "GO:0048468")
query_1	FALSE	1	29	26	1	0.0384615	0.0344828	GO:0048665	GO:BP	neuron fate specification	21100	14966	c("GO:0001708", "GO:0048663")
query_1	FALSE	1	128	26	1	0.0384615	0.0078125	GO:0048706	GO:BP	embryonic skeletal system development	21100	15006	c("GO:0001501", "GO:0043009")
query_1	FALSE	1	16	26	1	0.0384615	0.0625	GO:0060965	GO:BP	negative regulation of miRNA-mediated gene silencing	21100	17716	c("GO:0035195", "GO:0060964", "GO:1900369")
query_1	FALSE	1	1	26	1	0.0384615	1	GO:0061144	GO:BP	alveolar secondary septum development	21100	17883	c("GO:0060428", "GO:0060430")
query_1	FALSE	1	17	26	1	0.0384615	0.0588235	GO:0060967	GO:BP	negative regulation of gene silencing by RNA	21100	17718	c("GO:0010628", "GO:0031047", "GO:0048519", "GO:0060966")
query_1	FALSE	1	160	26	1	0.0384615	0.00625	GO:1903708	GO:BP	positive regulation of hemopoiesis	21100	26757	c("GO:0002684", "GO:0030097", "GO:0051094", "GO:0051240", "GO:1903706")
query_1	FALSE	1	20	26	1	0.0384615	0.05	GO:1903798	GO:BP	regulation of production of miRNAs involved in gene silencing by miRNA	21100	26827	c("GO:0035196", "GO:0070920")
query_1	FALSE	1	10	26	1	0.0384615	0.1	GO:1903799	GO:BP	negative regulation of production of miRNAs involved in gene silencing by miRNA	21100	26828	c("GO:0010629", "GO:0035196", "GO:0051253", "GO:0060965", "GO:1903798")
query_1	FALSE	1	193	26	1	0.0384615	0.00518135	GO:1903828	GO:BP	negative regulation of protein localization	21100	26851	c("GO:0008104", "GO:0032880", "GO:0048519")
query_1	FALSE	1	125	26	1	0.0384615	0.008	GO:1904375	GO:BP	regulation of protein localization to cell periphery	21100	27350	c("GO:0032880", "GO:0060341", "GO:1990778")
query_1	FALSE	1	28	26	1	0.0384615	0.0357143	GO:1904376	GO:BP	negative regulation of protein localization to cell periphery	21100	27351	c("GO:0048523", "GO:1903828", "GO:1904375", "GO:1990778")
query_1	FALSE	1	70	26	1	0.0384615	0.0142857	GO:1904888	GO:BP	cranial skeletal system development	21100	27817	GO:0048856
query_1	FALSE	1	65	26	1	0.0384615	0.0153846	GO:1905330	GO:BP	regulation of morphogenesis of an epithelium	21100	28232	c("GO:0002009", "GO:0022603")
query_1	FALSE	1	10	26	1	0.0384615	0.1	GO:1905383	GO:BP	protein localization to presynapse	21100	28275	GO:0035418
query_1	FALSE	1	181	26	1	0.0384615	0.00552486	GO:1905475	GO:BP	regulation of protein localization to membrane	21100	28365	c("GO:0032880", "GO:0060341", "GO:0072657")
query_1	FALSE	1	34	26	1	0.0384615	0.0294118	GO:1905476	GO:BP	negative regulation of protein localization to membrane	21100	28366	c("GO:0048523", "GO:0072657", "GO:1903828", "GO:1905475")
query_1	FALSE	1	1	26	1	0.0384615	1	GO:1905503	GO:BP	regulation of motile cilium assembly	21100	28392	c("GO:0044458", "GO:1902017")
query_1	FALSE	1	1	26	1	0.0384615	1	GO:1905505	GO:BP	positive regulation of motile cilium assembly	21100	28394	c("GO:0044458", "GO:0045724", "GO:1905503")
query_1	FALSE	1	336	26	2	0.0769231	0.00595238	GO:1990778	GO:BP	protein localization to cell periphery	21100	29114	GO:0034613
query_1	FALSE	1	1345	26	1	0.0384615	0.000743494	GO:2000026	GO:BP	regulation of multicellular organismal development	21100	29251	c("GO:0007275", "GO:0050793", "GO:0051239")
query_1	FALSE	1	11	26	1	0.0384615	0.0909091	GO:2000049	GO:BP	positive regulation of cell-cell adhesion mediated by cadherin	21100	29274	c("GO:0022409", "GO:0044331", "GO:2000047")
query_1	FALSE	1	57	26	1	0.0384615	0.0175439	GO:2000142	GO:BP	regulation of DNA-templated transcription, initiation	21100	29366	c("GO:0006352", "GO:0006355")
query_1	FALSE	1	46	26	1	0.0384615	0.0217391	GO:2000144	GO:BP	positive regulation of DNA-templated transcription, initiation	21100	29368	c("GO:0006352", "GO:0045893", "GO:2000142")
query_1	FALSE	1	176	26	1	0.0384615	0.00568182	GO:2000241	GO:BP	regulation of reproductive process	21100	29463	c("GO:0022414", "GO:0050789")
query_1	FALSE	1	65	26	1	0.0384615	0.0153846	GO:2000514	GO:BP	regulation of CD4-positive, alpha-beta T cell activation	21100	29727	c("GO:0035710", "GO:0046634")
query_1	FALSE	1	37	26	1	0.0384615	0.027027	GO:2000516	GO:BP	positive regulation of CD4-positive, alpha-beta T cell activation	21100	29729	c("GO:0035710", "GO:0046635", "GO:2000514")
query_1	FALSE	1	3461	26	6	0.230769	0.0017336	GO:2001141	GO:BP	regulation of RNA biosynthetic process	21100	30316	c("GO:0010556", "GO:0031326", "GO:0032774", "GO:0051252")
query_1	FALSE	1	16	26	1	0.0384615	0.0625	GO:2001256	GO:BP	regulation of store-operated calcium entry	21100	30420	c("GO:0002115", "GO:0051924")
query_1	FALSE	1	21	26	1	0.0384615	0.047619	GO:2000047	GO:BP	regulation of cell-cell adhesion mediated by cadherin	21100	29272	c("GO:0022407", "GO:0044331")
query_1	FALSE	1	374	26	1	0.0384615	0.0026738	GO:1903706	GO:BP	regulation of hemopoiesis	21100	26755	c("GO:0002682", "GO:0030097", "GO:2000026")
query_1	FALSE	1	1	26	1	0.0384615	1	GO:1903568	GO:BP	negative regulation of protein localization to ciliary membrane	21100	26620	c("GO:1903441", "GO:1903565", "GO:1903567", "GO:1904376", "GO:1905476")
query_1	FALSE	1	2	26	1	0.0384615	0.5	GO:1903567	GO:BP	regulation of protein localization to ciliary membrane	21100	26619	c("GO:1903441", "GO:1903564", "GO:1904375", "GO:1905475")
query_1	FALSE	1	3	26	1	0.0384615	0.333333	GO:1903565	GO:BP	negative regulation of protein localization to cilium	21100	26617	c("GO:0048523", "GO:0061512", "GO:1903564", "GO:1903828")
query_1	FALSE	1	573	26	2	0.0769231	0.0034904	GO:0071396	GO:BP	cellular response to lipid	21100	19425	c("GO:0033993", "GO:0071310")
query_1	FALSE	1	569	26	2	0.0769231	0.00351494	GO:0071407	GO:BP	cellular response to organic cyclic compound	21100	19436	c("GO:0014070", "GO:0071310")
query_1	FALSE	1	181	26	1	0.0384615	0.00552486	GO:0071453	GO:BP	cellular response to oxygen levels	21100	19475	c("GO:0070482", "GO:0070887")
query_1	FALSE	1	157	26	1	0.0384615	0.00636943	GO:0071456	GO:BP	cellular response to hypoxia	21100	19478	c("GO:0001666", "GO:0033554", "GO:0036294")
query_1	FALSE	1	1316	26	2	0.0769231	0.00151976	GO:0071495	GO:BP	cellular response to endogenous stimulus	21100	19516	GO:0009719
query_1	FALSE	1	38	26	1	0.0384615	0.0263158	GO:0071542	GO:BP	dopaminergic neuron differentiation	21100	19555	GO:0030182
query_1	FALSE	1	248	26	1	0.0384615	0.00403226	GO:0071695	GO:BP	anatomical structure maturation	21100	19674	c("GO:0021700", "GO:0048856")
query_1	FALSE	1	2654	26	3	0.115385	0.00113037	GO:0071702	GO:BP	organic substance transport	21100	19681	GO:0006810
query_1	FALSE	1	13889	26	15	0.576923	0.00107999	GO:0071704	GO:BP	organic substance metabolic process	21100	19683	GO:0008152
query_1	FALSE	1	2233	26	3	0.115385	0.00134348	GO:0071705	GO:BP	nitrogen compound transport	21100	19684	GO:0006810
query_1	FALSE	1	64	26	1	0.0384615	0.015625	GO:0071806	GO:BP	protein transmembrane transport	21100	19736	c("GO:0015031", "GO:0055085")
query_1	FALSE	1	269	26	1	0.0384615	0.00371747	GO:0071824	GO:BP	protein-DNA complex subunit organization	21100	19744	GO:0043933
query_1	FALSE	1	8070	26	9	0.346154	0.00111524	GO:0071840	GO:BP	cellular component organization or biogenesis	21100	19757	GO:0009987
query_1	FALSE	1	38	26	1	0.0384615	0.0263158	GO:0071985	GO:BP	multivesicular body sorting pathway	21100	19861	GO:0016192
query_1	FALSE	1	40	26	1	0.0384615	0.025	GO:0071392	GO:BP	cellular response to estradiol stimulus	21100	19421	c("GO:0032355", "GO:0071396", "GO:0071407", "GO:1901701")
query_1	FALSE	1	314	26	1	0.0384615	0.00318471	GO:0072001	GO:BP	renal system development	21100	19872	c("GO:0001655", "GO:0048731")
query_1	FALSE	1	324	26	1	0.0384615	0.00308642	GO:0072503	GO:BP	cellular divalent inorganic cation homeostasis	21100	20303	c("GO:0030003", "GO:0072507")
query_1	FALSE	1	354	26	1	0.0384615	0.00282486	GO:0072507	GO:BP	divalent inorganic cation homeostasis	21100	20307	c("GO:0055080", "GO:0098771")
query_1	FALSE	1	413	26	1	0.0384615	0.00242131	GO:0072521	GO:BP	purine-containing compound metabolic process	21100	20313	c("GO:0006725", "GO:0034641", "GO:0046483", "GO:1901360", "GO:1901564")
query_1	FALSE	1	200	26	1	0.0384615	0.005	GO:0072522	GO:BP	purine-containing compound biosynthetic process	21100	20314	c("GO:0018130", "GO:0019438", "GO:0044271", "GO:0072521", "GO:1901362", "GO:1901566")
query_1	FALSE	1	82	26	1	0.0384615	0.0121951	GO:0072527	GO:BP	pyrimidine-containing compound metabolic process	21100	20319	c("GO:0034641", "GO:0046483", "GO:1901360", "GO:1901564")
query_1	FALSE	1	37	26	1	0.0384615	0.027027	GO:0072528	GO:BP	pyrimidine-containing compound biosynthetic process	21100	20320	c("GO:0018130", "GO:0044271", "GO:0072527", "GO:1901362", "GO:1901566")
query_1	FALSE	1	799	26	2	0.0769231	0.00250313	GO:0072657	GO:BP	protein localization to membrane	21100	20369	c("GO:0034613", "GO:0051668")
query_1	FALSE	1	5812	26	9	0.346154	0.00154852	GO:0080090	GO:BP	regulation of primary metabolic process	21100	20855	c("GO:0019222", "GO:0044238")
query_1	FALSE	1	1312	26	1	0.0384615	0.000762195	GO:0080134	GO:BP	regulation of response to stress	21100	20874	c("GO:0006950", "GO:0048583")
query_1	FALSE	1	491	26	1	0.0384615	0.00203666	GO:0090066	GO:BP	regulation of anatomical structure size	21100	21090	GO:0065008
query_1	FALSE	1	7540	26	7	0.269231	0.000928382	GO:0090304	GO:BP	nucleic acid metabolic process	21100	21315	c("GO:0006139", "GO:0043170")
query_1	FALSE	1	246	26	1	0.0384615	0.00406504	GO:0090305	GO:BP	nucleic acid phosphodiester bond hydrolysis	21100	21316	GO:0090304
query_1	FALSE	1	561	26	1	0.0384615	0.00178253	GO:0090407	GO:BP	organophosphate biosynthetic process	21100	21410	c("GO:0019637", "GO:1901576")
query_1	FALSE	1	156	26	1	0.0384615	0.00641026	GO:0090501	GO:BP	RNA phosphodiester bond hydrolysis	21100	21464	c("GO:0016070", "GO:0090305")
query_1	FALSE	1	124	26	1	0.0384615	0.00806452	GO:0072329	GO:BP	monocarboxylic acid catabolic process	21100	20192	c("GO:0032787", "GO:0046395")
query_1	FALSE	1	280	26	1	0.0384615	0.00357143	GO:0090596	GO:BP	sensory organ morphogenesis	21100	21507	c("GO:0007423", "GO:0009887")
query_1	FALSE	1	17	26	1	0.0384615	0.0588235	GO:0071391	GO:BP	cellular response to estrogen stimulus	21100	19420	c("GO:0032870", "GO:0043627")
query_1	FALSE	1	655	26	1	0.0384615	0.00152672	GO:0071363	GO:BP	cellular response to growth factor stimulus	21100	19392	c("GO:0070848", "GO:0071310")
query_1	FALSE	1	87	26	1	0.0384615	0.0114943	GO:0061053	GO:BP	somite development	21100	17795	c("GO:0009790", "GO:0060429")
query_1	FALSE	1	4	26	1	0.0384615	0.25	GO:0061055	GO:BP	myotome development	21100	17797	c("GO:0048856", "GO:0061053")
query_1	FALSE	1	183	26	2	0.0769231	0.010929	GO:0061138	GO:BP	morphogenesis of a branching epithelium	21100	17877	c("GO:0001763", "GO:0002009")
query_1	FALSE	1	1550	26	3	0.115385	0.00193548	GO:0045595	GO:BP	regulation of cell differentiation	21100	13327	c("GO:0030154", "GO:0050793", "GO:0050794")
query_1	FALSE	1	71	26	1	0.0384615	0.0140845	GO:0061180	GO:BP	mammary gland epithelium development	21100	17911	c("GO:0030879", "GO:0060429")
query_1	FALSE	1	21	26	1	0.0384615	0.047619	GO:0061377	GO:BP	mammary gland lobule development	21100	18105	c("GO:0030879", "GO:0048856")
query_1	FALSE	1	265	26	2	0.0769231	0.00754717	GO:0061448	GO:BP	connective tissue development	21100	18176	GO:0009888
query_1	FALSE	1	52	26	2	0.0769231	0.0384615	GO:0061647	GO:BP	histone H3-K9 modification	21100	18305	GO:0016570
query_1	FALSE	1	541	26	1	0.0384615	0.00184843	GO:0061919	GO:BP	process utilizing autophagic mechanism	21100	18439	GO:0009987
query_1	FALSE	1	102	26	1	0.0384615	0.00980392	GO:0062207	GO:BP	regulation of pattern recognition receptor signaling pathway	21100	18585	c("GO:0002221", "GO:0009966", "GO:0050776")
query_1	FALSE	1	3197	26	4	0.153846	0.00125117	GO:0065003	GO:BP	protein-containing complex assembly	21100	18609	c("GO:0022607", "GO:0043933")
query_1	FALSE	1	233	26	1	0.0384615	0.00429185	GO:0065004	GO:BP	protein-DNA complex assembly	21100	18610	c("GO:0065003", "GO:0071824")
query_1	FALSE	1	13001	26	22	0.846154	0.00169218	GO:0065007	GO:BP	biological regulation	21100	18612	GO:0008150
query_1	FALSE	1	3768	26	6	0.230769	0.00159236	GO:0065008	GO:BP	regulation of biological quality	21100	18613	GO:0065007
query_1	FALSE	1	206	26	2	0.0769231	0.00970874	GO:0071383	GO:BP	cellular response to steroid hormone stimulus	21100	19412	c("GO:0032870", "GO:0048545", "GO:0071396", "GO:0071407")
query_1	FALSE	1	3050	26	5	0.192308	0.00163934	GO:0065009	GO:BP	regulation of molecular function	21100	18614	GO:0065007
query_1	FALSE	1	39	26	1	0.0384615	0.025641	GO:0070286	GO:BP	axonemal dynein complex assembly	21100	18771	c("GO:0035082", "GO:0065003")
query_1	FALSE	1	339	26	1	0.0384615	0.00294985	GO:0070482	GO:BP	response to oxygen levels	21100	18886	GO:0009628
query_1	FALSE	1	10	26	1	0.0384615	0.1	GO:0070544	GO:BP	histone H3-K36 demethylation	21100	18922	GO:0070076
query_1	FALSE	1	1067	26	1	0.0384615	0.000937207	GO:0070647	GO:BP	protein modification by small protein conjugation or removal	21100	18983	GO:0006464
query_1	FALSE	1	1922	26	6	0.230769	0.00312175	GO:0070727	GO:BP	cellular macromolecule localization	21100	19028	c("GO:0033036", "GO:0051641")
query_1	FALSE	1	685	26	1	0.0384615	0.00145985	GO:0070848	GO:BP	response to growth factor	21100	19096	GO:0010033
query_1	FALSE	1	3019	26	4	0.153846	0.00132494	GO:0070887	GO:BP	cellular response to chemical stimulus	21100	19115	c("GO:0042221", "GO:0051716")
query_1	FALSE	1	54	26	1	0.0384615	0.0185185	GO:0070897	GO:BP	transcription preinitiation complex assembly	21100	19121	c("GO:0006352", "GO:0065004")
query_1	FALSE	1	52	26	1	0.0384615	0.0192308	GO:0070918	GO:BP	primary sncRNA processing	21100	19132	c("GO:0031047", "GO:0034470")
query_1	FALSE	1	20	26	1	0.0384615	0.05	GO:0070920	GO:BP	regulation of production of small RNA involved in gene silencing by RNA	21100	19134	c("GO:0051252", "GO:0060966", "GO:0070918")
query_1	FALSE	1	900	26	3	0.115385	0.00333333	GO:0070925	GO:BP	organelle assembly	21100	19137	c("GO:0006996", "GO:0022607")
query_1	FALSE	1	75	26	1	0.0384615	0.0133333	GO:0070988	GO:BP	demethylation	21100	19186	GO:0008152
query_1	FALSE	1	35	26	1	0.0384615	0.0285714	GO:0071168	GO:BP	protein localization to chromatin	21100	19238	GO:0034502
query_1	FALSE	1	2391	26	4	0.153846	0.00167294	GO:0071310	GO:BP	cellular response to organic substance	21100	19341	c("GO:0010033", "GO:0070887")
query_1	FALSE	1	29	26	1	0.0384615	0.0344828	GO:0070076	GO:BP	histone lysine demethylation	21100	18627	GO:0016577
query_1	FALSE	1	42	26	1	0.0384615	0.0238095	GO:0060966	GO:BP	regulation of gene silencing by RNA	21100	17717	c("GO:0010468", "GO:0031047")
query_1	FALSE	1	115	26	1	0.0384615	0.00869565	GO:0090630	GO:BP	activation of GTPase activity	21100	21528	GO:0043547
query_1	FALSE	1	128	26	1	0.0384615	0.0078125	GO:0097722	GO:BP	sperm motility	21100	21935	c("GO:0022414", "GO:0048870")
query_1	FALSE	1	1350	26	1	0.0384615	0.000740741	GO:1901565	GO:BP	organonitrogen compound catabolic process	21100	24854	c("GO:1901564", "GO:1901575")
query_1	FALSE	1	1708	26	1	0.0384615	0.00058548	GO:1901566	GO:BP	organonitrogen compound biosynthetic process	21100	24855	c("GO:1901564", "GO:1901576")
query_1	FALSE	1	2103	26	2	0.0769231	0.000951022	GO:1901575	GO:BP	organic substance catabolic process	21100	24863	c("GO:0009056", "GO:0071704")
query_1	FALSE	1	5774	26	7	0.269231	0.00121233	GO:1901576	GO:BP	organic substance biosynthetic process	21100	24864	c("GO:0009058", "GO:0071704")
query_1	FALSE	1	477	26	1	0.0384615	0.00209644	GO:1901652	GO:BP	response to peptide	21100	24928	c("GO:0010243", "GO:1901700")
query_1	FALSE	1	1100	26	1	0.0384615	0.000909091	GO:1901698	GO:BP	response to nitrogen compound	21100	24964	GO:0042221
query_1	FALSE	1	1624	26	3	0.115385	0.00184729	GO:1901700	GO:BP	response to oxygen-containing compound	21100	24966	GO:0042221
query_1	FALSE	1	1166	26	1	0.0384615	0.000857633	GO:1901701	GO:BP	cellular response to oxygen-containing compound	21100	24967	c("GO:0070887", "GO:1901700")
query_1	FALSE	1	64	26	1	0.0384615	0.015625	GO:1902017	GO:BP	regulation of cilium assembly	21100	25275	c("GO:0060271", "GO:0120032", "GO:1902115")
query_1	FALSE	1	288	26	1	0.0384615	0.00347222	GO:1902105	GO:BP	regulation of leukocyte differentiation	21100	25355	c("GO:0002521", "GO:0045595", "GO:1903706")
query_1	FALSE	1	160	26	1	0.0384615	0.00625	GO:1902107	GO:BP	positive regulation of leukocyte differentiation	21100	25357	c("GO:0002521", "GO:0045597", "GO:1902105", "GO:1903708")
query_1	FALSE	1	203	26	1	0.0384615	0.00492611	GO:1902115	GO:BP	regulation of organelle assembly	21100	25365	c("GO:0033043", "GO:0044087", "GO:0070925")
query_1	FALSE	1	80	26	1	0.0384615	0.0125	GO:1902117	GO:BP	positive regulation of organelle assembly	21100	25367	c("GO:0010638", "GO:0044089", "GO:0070925", "GO:1902115")
query_1	FALSE	1	98	26	1	0.0384615	0.0102041	GO:1902414	GO:BP	protein localization to cell junction	21100	25630	GO:0008104
query_1	FALSE	1	6446	26	9	0.346154	0.00139621	GO:1901564	GO:BP	organonitrogen compound metabolic process	21100	24853	c("GO:0006807", "GO:0071704")
query_1	FALSE	1	1691	26	2	0.0769231	0.00118273	GO:1902531	GO:BP	regulation of intracellular signal transduction	21100	25711	c("GO:0009966", "GO:0035556")
query_1	FALSE	1	1297	26	5	0.192308	0.00385505	GO:1902679	GO:BP	negative regulation of RNA biosynthetic process	21100	25829	c("GO:0010558", "GO:0031327", "GO:0032774", "GO:0051253", "GO:2001141")
query_1	FALSE	1	1642	26	4	0.153846	0.00243605	GO:1902680	GO:BP	positive regulation of RNA biosynthetic process	21100	25830	c("GO:0010557", "GO:0031328", "GO:0032774", "GO:0051254", "GO:2001141")
query_1	FALSE	1	1	26	1	0.0384615	1	GO:1902691	GO:BP	respiratory basal cell differentiation	21100	25840	c("GO:0030855", "GO:0048863")
query_1	FALSE	1	8	26	1	0.0384615	0.125	GO:1902732	GO:BP	positive regulation of chondrocyte proliferation	21100	25871	c("GO:0008284", "GO:0035988")
query_1	FALSE	1	334	26	1	0.0384615	0.00299401	GO:1903037	GO:BP	regulation of leukocyte cell-cell adhesion	21100	26150	c("GO:0007159", "GO:0022407")
query_1	FALSE	1	242	26	1	0.0384615	0.00413223	GO:1903039	GO:BP	positive regulation of leukocyte cell-cell adhesion	21100	26152	c("GO:0007159", "GO:0022409", "GO:1903037")
query_1	FALSE	1	440	26	1	0.0384615	0.00227273	GO:1903131	GO:BP	mononuclear cell differentiation	21100	26236	GO:0002521
query_1	FALSE	1	3452	26	6	0.230769	0.00173812	GO:1903506	GO:BP	regulation of nucleic acid-templated transcription	21100	26560	c("GO:0097659", "GO:2001141")
query_1	FALSE	1	1295	26	5	0.192308	0.003861	GO:1903507	GO:BP	negative regulation of nucleic acid-templated transcription	21100	26561	c("GO:0097659", "GO:1902679", "GO:1903506")
query_1	FALSE	1	1636	26	4	0.153846	0.00244499	GO:1903508	GO:BP	positive regulation of nucleic acid-templated transcription	21100	26562	c("GO:0097659", "GO:1902680", "GO:1903506")
query_1	FALSE	1	251	26	1	0.0384615	0.00398406	GO:1903522	GO:BP	regulation of blood circulation	21100	26576	c("GO:0008015", "GO:0044057")
query_1	FALSE	1	547	26	1	0.0384615	0.00182815	GO:1903530	GO:BP	regulation of secretion by cell	21100	26584	c("GO:0032940", "GO:0050794", "GO:0051046")
query_1	FALSE	1	275	26	1	0.0384615	0.00363636	GO:1903532	GO:BP	positive regulation of secretion by cell	21100	26586	c("GO:0032940", "GO:0048522", "GO:0051047", "GO:1903530")
query_1	FALSE	1	11	26	1	0.0384615	0.0909091	GO:1903564	GO:BP	regulation of protein localization to cilium	21100	26616	c("GO:0032880", "GO:0060341", "GO:0061512")
query_1	FALSE	1	508	26	1	0.0384615	0.0019685	GO:1902532	GO:BP	negative regulation of intracellular signal transduction	21100	25712	c("GO:0009968", "GO:0035556", "GO:1902531")
query_1	FALSE	1	3580	26	6	0.230769	0.00167598	GO:0097659	GO:BP	nucleic acid-templated transcription	21100	21907	c("GO:0010467", "GO:0032774")
query_1	FALSE	1	11	26	1	0.0384615	0.0909091	GO:1901533	GO:BP	negative regulation of hematopoietic progenitor cell differentiation	21100	24823	c("GO:0002244", "GO:0045596", "GO:1901532")
query_1	FALSE	1	4213	26	7	0.269231	0.00166152	GO:1901362	GO:BP	organic cyclic compound biosynthetic process	21100	24667	c("GO:1901360", "GO:1901576")
query_1	FALSE	1	139	26	1	0.0384615	0.00719424	GO:0097746	GO:BP	blood vessel diameter maintenance	21100	21947	c("GO:0003018", "GO:0008015", "GO:0035296")
query_1	FALSE	1	913	26	2	0.0769231	0.00219058	GO:0098609	GO:BP	cell-cell adhesion	21100	22001	GO:0007155
query_1	FALSE	1	137	26	1	0.0384615	0.00729927	GO:0098732	GO:BP	macromolecule deacylation	21100	22060	GO:0043412
query_1	FALSE	1	596	26	1	0.0384615	0.00167785	GO:0098771	GO:BP	inorganic ion homeostasis	21100	22088	GO:0050801
query_1	FALSE	1	13	26	1	0.0384615	0.0769231	GO:0098840	GO:BP	protein transport along microtubule	21100	22123	c("GO:0006886", "GO:0010970", "GO:0099118")
query_1	FALSE	1	64	26	1	0.0384615	0.015625	GO:0098930	GO:BP	axonal transport	21100	22172	GO:0008088
query_1	FALSE	1	206	26	1	0.0384615	0.00485437	GO:0099003	GO:BP	vesicle-mediated transport in synapse	21100	22212	GO:0016192
query_1	FALSE	1	197	26	3	0.115385	0.0152284	GO:0099111	GO:BP	microtubule-based transport	21100	22259	c("GO:0006810", "GO:0007018")
query_1	FALSE	1	13	26	1	0.0384615	0.0769231	GO:0099118	GO:BP	microtubule-based protein transport	21100	22264	c("GO:0015031", "GO:0099111")
query_1	FALSE	1	190	26	1	0.0384615	0.00526316	GO:0099504	GO:BP	synaptic vesicle cycle	21100	22316	c("GO:0051649", "GO:0099003")
query_1	FALSE	1	9	26	1	0.0384615	0.111111	GO:0099640	GO:BP	axo-dendritic protein transport	21100	22396	c("GO:0008088", "GO:0098840")
query_1	FALSE	1	8	26	1	0.0384615	0.125	GO:0099641	GO:BP	anterograde axonal protein transport	21100	22397	c("GO:0008089", "GO:0099640", "GO:1905383")
query_1	FALSE	1	553	26	3	0.115385	0.00542495	GO:0120031	GO:BP	plasma membrane bounded cell projection assembly	21100	22772	c("GO:0030031", "GO:0120036")
query_1	FALSE	1	194	26	1	0.0384615	0.00515464	GO:0120032	GO:BP	regulation of plasma membrane bounded cell projection assembly	21100	22773	c("GO:0060491", "GO:0120031", "GO:0120035")
query_1	FALSE	1	56	26	1	0.0384615	0.0178571	GO:1901532	GO:BP	regulation of hematopoietic progenitor cell differentiation	21100	24822	c("GO:0002244", "GO:0045595")
query_1	FALSE	1	107	26	1	0.0384615	0.00934579	GO:0120034	GO:BP	positive regulation of plasma membrane bounded cell projection assembly	21100	22775	c("GO:0031346", "GO:0044089", "GO:0120031", "GO:0120032")
query_1	FALSE	1	1485	26	4	0.153846	0.0026936	GO:0120036	GO:BP	plasma membrane bounded cell projection organization	21100	22777	GO:0030030
query_1	FALSE	1	156	26	1	0.0384615	0.00641026	GO:0120254	GO:BP	olefinic compound metabolic process	21100	22899	GO:0071704
query_1	FALSE	1	62	26	1	0.0384615	0.016129	GO:0140238	GO:BP	presynaptic endocytosis	21100	23029	c("GO:0006897", "GO:0051649", "GO:0099003")
query_1	FALSE	1	845	26	1	0.0384615	0.00118343	GO:0140352	GO:BP	export from cell	21100	23070	c("GO:0006810", "GO:0009987")
query_1	FALSE	1	394	26	1	0.0384615	0.00253807	GO:0150063	GO:BP	visual system development	21100	23254	GO:0048880
query_1	FALSE	1	13	26	1	0.0384615	0.0769231	GO:1900112	GO:BP	regulation of histone H3-K9 trimethylation	21100	23460	c("GO:0036124", "GO:0051570")
query_1	FALSE	1	7	26	1	0.0384615	0.142857	GO:1900113	GO:BP	negative regulation of histone H3-K9 trimethylation	21100	23461	c("GO:0036124", "GO:0051573", "GO:1900112")
query_1	FALSE	1	42	26	1	0.0384615	0.0238095	GO:1900274	GO:BP	regulation of phospholipase C activity	21100	23612	GO:0010517
query_1	FALSE	1	41	26	1	0.0384615	0.0243902	GO:1900368	GO:BP	regulation of post-transcriptional gene silencing by RNA	21100	23706	c("GO:0035194", "GO:0060147", "GO:0060966")
query_1	FALSE	1	17	26	1	0.0384615	0.0588235	GO:1900369	GO:BP	negative regulation of post-transcriptional gene silencing by RNA	21100	23707	c("GO:0035194", "GO:0060149", "GO:0060967", "GO:1900368")
query_1	FALSE	1	1031	26	1	0.0384615	0.000969932	GO:1901135	GO:BP	carbohydrate derivative metabolic process	21100	24457	GO:0071704
query_1	FALSE	1	612	26	1	0.0384615	0.00163399	GO:1901137	GO:BP	carbohydrate derivative biosynthetic process	21100	24459	c("GO:1901135", "GO:1901576")
query_1	FALSE	1	256	26	1	0.0384615	0.00390625	GO:1901293	GO:BP	nucleoside phosphate biosynthetic process	21100	24602	c("GO:0006753", "GO:0034654", "GO:0090407")
query_1	FALSE	1	8461	26	8	0.307692	0.000945515	GO:1901360	GO:BP	organic cyclic compound metabolic process	21100	24665	GO:0071704
query_1	FALSE	1	619	26	1	0.0384615	0.00161551	GO:0120035	GO:BP	regulation of plasma membrane bounded cell projection organization	21100	22776	c("GO:0031344", "GO:0120036")
query_1	FALSE	1	95	26	1	0.0384615	0.0105263	GO:0045582	GO:BP	positive regulation of T cell differentiation	21100	13314	c("GO:0030217", "GO:0045580", "GO:0045621", "GO:0050870")
query_1	FALSE	1	266	26	1	0.0384615	0.0037594	GO:0045165	GO:BP	cell fate commitment	21100	13155	c("GO:0030154", "GO:0048869")
query_1	FALSE	1	953	26	1	0.0384615	0.00104932	GO:0045321	GO:BP	leukocyte activation	21100	13217	c("GO:0001775", "GO:0002376")
query_1	FALSE	1	14415	26	15	0.576923	0.00104058	GO:0008152	GO:BP	metabolic process	21100	3531	GO:0008150
query_1	FALSE	1	319	26	1	0.0384615	0.0031348	GO:0008202	GO:BP	steroid metabolic process	21100	3543	c("GO:0006629", "GO:1901360")
query_1	FALSE	1	29	26	1	0.0384615	0.0344828	GO:0008209	GO:BP	androgen metabolic process	21100	3550	c("GO:0008202", "GO:0034754")
query_1	FALSE	1	204	26	2	0.0769231	0.00980392	GO:0008213	GO:BP	protein alkylation	21100	3554	GO:0006464
query_1	FALSE	1	35	26	1	0.0384615	0.0285714	GO:0008214	GO:BP	protein dealkylation	21100	3555	GO:0006464
query_1	FALSE	1	2074	26	4	0.153846	0.00192864	GO:0008219	GO:BP	cell death	21100	3560	GO:0009987
query_1	FALSE	1	1958	26	4	0.153846	0.0020429	GO:0008283	GO:BP	cell population proliferation	21100	3567	GO:0009987
query_1	FALSE	1	929	26	3	0.115385	0.00322928	GO:0008284	GO:BP	positive regulation of cell population proliferation	21100	3568	c("GO:0008283", "GO:0042127", "GO:0048522")
query_1	FALSE	1	713	26	1	0.0384615	0.00140252	GO:0008285	GO:BP	negative regulation of cell population proliferation	21100	3569	c("GO:0008283", "GO:0042127", "GO:0048523")
query_1	FALSE	1	226	26	3	0.115385	0.0132743	GO:0008406	GO:BP	gonad development	21100	3609	c("GO:0045137", "GO:0048513", "GO:0048608")
query_1	FALSE	1	141	26	2	0.0769231	0.0141844	GO:0008584	GO:BP	male gonad development	21100	3618	c("GO:0008406", "GO:0046546")
query_1	FALSE	1	104	26	1	0.0384615	0.00961538	GO:0008585	GO:BP	female gonad development	21100	3619	c("GO:0008406", "GO:0046545")
query_1	FALSE	1	2559	26	2	0.0769231	0.000781555	GO:0009056	GO:BP	catabolic process	21100	3659	GO:0008152
query_1	FALSE	1	1359	26	1	0.0384615	0.000735835	GO:0009057	GO:BP	macromolecule catabolic process	21100	3660	c("GO:0043170", "GO:1901575")
query_1	FALSE	1	5861	26	8	0.307692	0.00136495	GO:0009058	GO:BP	biosynthetic process	21100	3661	GO:0008152
query_1	FALSE	1	4770	26	6	0.230769	0.00125786	GO:0009059	GO:BP	macromolecule biosynthetic process	21100	3662	c("GO:0043170", "GO:1901576")
query_1	FALSE	1	102	26	1	0.0384615	0.00980392	GO:0009062	GO:BP	fatty acid catabolic process	21100	3665	c("GO:0006631", "GO:0044242", "GO:0072329")
query_1	FALSE	1	485	26	1	0.0384615	0.00206186	GO:0009117	GO:BP	nucleotide metabolic process	21100	3718	GO:0006753
query_1	FALSE	1	131	26	1	0.0384615	0.00763359	GO:0009132	GO:BP	nucleoside diphosphate metabolic process	21100	3731	GO:0006753
query_1	FALSE	1	107	26	1	0.0384615	0.00934579	GO:0009141	GO:BP	nucleoside triphosphate metabolic process	21100	3740	GO:0006753
query_1	FALSE	1	82	26	1	0.0384615	0.0121951	GO:0009142	GO:BP	nucleoside triphosphate biosynthetic process	21100	3741	c("GO:0009141", "GO:1901293")
query_1	FALSE	1	84	26	1	0.0384615	0.0119048	GO:0009144	GO:BP	purine nucleoside triphosphate metabolic process	21100	3743	GO:0009141
query_1	FALSE	1	66	26	1	0.0384615	0.0151515	GO:0009145	GO:BP	purine nucleoside triphosphate biosynthetic process	21100	3744	c("GO:0009142", "GO:0009144")
query_1	FALSE	1	24	26	1	0.0384615	0.0416667	GO:0009147	GO:BP	pyrimidine nucleoside triphosphate metabolic process	21100	3746	GO:0009141
query_1	FALSE	1	19	26	1	0.0384615	0.0526316	GO:0009148	GO:BP	pyrimidine nucleoside triphosphate biosynthetic process	21100	3747	c("GO:0009142", "GO:0009147")
query_1	FALSE	1	364	26	1	0.0384615	0.00274725	GO:0009150	GO:BP	purine ribonucleotide metabolic process	21100	3749	c("GO:0006163", "GO:0009259")
query_1	FALSE	1	168	26	1	0.0384615	0.00595238	GO:0009152	GO:BP	purine ribonucleotide biosynthetic process	21100	3751	c("GO:0006164", "GO:0009150", "GO:0009260")
query_1	FALSE	1	253	26	1	0.0384615	0.00395257	GO:0009165	GO:BP	nucleotide biosynthetic process	21100	3763	c("GO:0009117", "GO:1901293")
query_1	FALSE	1	86	26	1	0.0384615	0.0116279	GO:0009199	GO:BP	ribonucleoside triphosphate metabolic process	21100	3797	GO:0009141
query_1	FALSE	1	21100	26	26	1	0.00123223	GO:0008150	GO:BP	biological_process	21100	3530	character(0)
query_1	FALSE	1	2665	26	7	0.269231	0.00262664	GO:0008104	GO:BP	protein localization	21100	3529	GO:0033036
query_1	FALSE	1	49	26	1	0.0384615	0.0204082	GO:0008089	GO:BP	anterograde axonal transport	21100	3526	GO:0098930
query_1	FALSE	1	76	26	1	0.0384615	0.0131579	GO:0008088	GO:BP	axo-dendritic transport	21100	3525	GO:0010970
query_1	FALSE	1	5957	26	9	0.346154	0.00151083	GO:0007165	GO:BP	signal transduction	21100	3065	c("GO:0007154", "GO:0009987", "GO:0023052", "GO:0050794", "GO:0051716")
query_1	FALSE	1	2811	26	5	0.192308	0.00177873	GO:0007166	GO:BP	cell surface receptor signaling pathway	21100	3066	GO:0007165
query_1	FALSE	1	951	26	1	0.0384615	0.00105152	GO:0007167	GO:BP	enzyme-linked receptor protein signaling pathway	21100	3067	GO:0007166
query_1	FALSE	1	613	26	1	0.0384615	0.00163132	GO:0007169	GO:BP	transmembrane receptor protein tyrosine kinase signaling pathway	21100	3069	GO:0007167
query_1	FALSE	1	1247	26	1	0.0384615	0.000801925	GO:0007186	GO:BP	G protein-coupled receptor signaling pathway	21100	3084	GO:0007165
query_1	FALSE	1	103	26	1	0.0384615	0.00970874	GO:0007200	GO:BP	phospholipase C-activating G protein-coupled receptor signaling pathway	21100	3098	GO:0007186
query_1	FALSE	1	203	26	1	0.0384615	0.00492611	GO:0007204	GO:BP	positive regulation of cytosolic calcium ion concentration	21100	3102	GO:0065008
query_1	FALSE	1	182	26	1	0.0384615	0.00549451	GO:0007219	GO:BP	Notch signaling pathway	21100	3117	GO:0007166
query_1	FALSE	1	3	26	1	0.0384615	0.333333	GO:0007227	GO:BP	signal transduction downstream of smoothened	21100	3123	c("GO:0007224", "GO:0035556")
query_1	FALSE	1	3	26	1	0.0384615	0.333333	GO:0007228	GO:BP	positive regulation of hh target transcription factor activity	21100	3124	c("GO:0007227", "GO:0051091")
query_1	FALSE	1	288	26	1	0.0384615	0.00347222	GO:0007249	GO:BP	I-kappaB kinase/NF-kappaB signaling	21100	3142	GO:0035556
query_1	FALSE	1	1661	26	1	0.0384615	0.000602047	GO:0007267	GO:BP	cell-cell signaling	21100	3158	c("GO:0007154", "GO:0023052")
query_1	FALSE	1	4768	26	9	0.346154	0.00188758	GO:0007275	GO:BP	multicellular organism development	21100	3166	c("GO:0032501", "GO:0048856")
query_1	FALSE	1	741	26	1	0.0384615	0.00134953	GO:0007276	GO:BP	gamete generation	21100	3167	c("GO:0019953", "GO:0048609")
query_1	FALSE	1	71	26	1	0.0384615	0.0140845	GO:0009201	GO:BP	ribonucleoside triphosphate biosynthetic process	21100	3799	c("GO:0009142", "GO:0009199")
query_1	FALSE	1	573	26	1	0.0384615	0.0017452	GO:0007283	GO:BP	spermatogenesis	21100	3174	c("GO:0003006", "GO:0048232")
query_1	FALSE	1	465	26	2	0.0769231	0.00430108	GO:0007389	GO:BP	pattern specification process	21100	3266	c("GO:0007275", "GO:0032501")
query_1	FALSE	1	2430	26	5	0.192308	0.00205761	GO:0007399	GO:BP	nervous system development	21100	3276	GO:0048731
query_1	FALSE	1	1037	26	2	0.0769231	0.00192864	GO:0007417	GO:BP	central nervous system development	21100	3291	c("GO:0007399", "GO:0048731")
query_1	FALSE	1	762	26	2	0.0769231	0.00262467	GO:0007420	GO:BP	brain development	21100	3294	c("GO:0007417", "GO:0048513", "GO:0060322")
query_1	FALSE	1	585	26	1	0.0384615	0.0017094	GO:0007423	GO:BP	sensory organ development	21100	3297	GO:0048513
query_1	FALSE	1	282	26	3	0.115385	0.0106383	GO:0007548	GO:BP	sex differentiation	21100	3411	GO:0003006
query_1	FALSE	1	182	26	2	0.0769231	0.010989	GO:0007565	GO:BP	female pregnancy	21100	3428	c("GO:0044703", "GO:0044706")
query_1	FALSE	1	54	26	1	0.0384615	0.0185185	GO:0007566	GO:BP	embryo implantation	21100	3429	c("GO:0007275", "GO:0007565", "GO:0022414")
query_1	FALSE	1	171	26	1	0.0384615	0.00584795	GO:0007568	GO:BP	aging	21100	3431	GO:0032502
query_1	FALSE	1	154	26	1	0.0384615	0.00649351	GO:0007584	GO:BP	response to nutrient	21100	3446	c("GO:0031667", "GO:0042221")
query_1	FALSE	1	138	26	1	0.0384615	0.00724638	GO:0007586	GO:BP	digestion	21100	3448	GO:0032501
query_1	FALSE	1	966	26	1	0.0384615	0.0010352	GO:0007600	GO:BP	sensory perception	21100	3461	GO:0050877
query_1	FALSE	1	499	26	1	0.0384615	0.00200401	GO:0007606	GO:BP	sensory perception of chemical stimulus	21100	3467	GO:0007600
query_1	FALSE	1	502	26	1	0.0384615	0.00199203	GO:0008015	GO:BP	blood circulation	21100	3500	GO:0003013
query_1	FALSE	1	475	26	1	0.0384615	0.00210526	GO:0007346	GO:BP	regulation of mitotic cell cycle	21100	3225	c("GO:0000278", "GO:0051726")
query_1	FALSE	1	79	26	1	0.0384615	0.0126582	GO:0009205	GO:BP	purine ribonucleoside triphosphate metabolic process	21100	3803	c("GO:0009144", "GO:0009199")
query_1	FALSE	1	65	26	1	0.0384615	0.0153846	GO:0009206	GO:BP	purine ribonucleoside triphosphate biosynthetic process	21100	3804	c("GO:0009145", "GO:0009201", "GO:0009205")
query_1	FALSE	1	18	26	1	0.0384615	0.0555556	GO:0009208	GO:BP	pyrimidine ribonucleoside triphosphate metabolic process	21100	3806	c("GO:0009147", "GO:0009199")
query_1	FALSE	1	509	26	1	0.0384615	0.00196464	GO:0010498	GO:BP	proteasomal protein catabolic process	21100	4665	c("GO:0030163", "GO:0051603")
query_1	FALSE	1	339	26	1	0.0384615	0.00294985	GO:0010506	GO:BP	regulation of autophagy	21100	4672	c("GO:0006914", "GO:0031329")
query_1	FALSE	1	66	26	1	0.0384615	0.0151515	GO:0010517	GO:BP	regulation of phospholipase activity	21100	4683	GO:0060191
query_1	FALSE	1	55	26	1	0.0384615	0.0181818	GO:0010518	GO:BP	positive regulation of phospholipase activity	21100	4684	c("GO:0010517", "GO:0060193")
query_1	FALSE	1	3926	26	6	0.230769	0.00152827	GO:0010556	GO:BP	regulation of macromolecule biosynthetic process	21100	4707	c("GO:0009059", "GO:0009889", "GO:0060255")
query_1	FALSE	1	1859	26	4	0.153846	0.00215169	GO:0010557	GO:BP	positive regulation of macromolecule biosynthetic process	21100	4708	c("GO:0009059", "GO:0009891", "GO:0010556", "GO:0010604")
query_1	FALSE	1	1508	26	5	0.192308	0.00331565	GO:0010558	GO:BP	negative regulation of macromolecule biosynthetic process	21100	4709	c("GO:0009059", "GO:0009890", "GO:0010556", "GO:0010605")
query_1	FALSE	1	895	26	1	0.0384615	0.00111732	GO:0010562	GO:BP	positive regulation of phosphorus metabolic process	21100	4713	c("GO:0006793", "GO:0031325", "GO:0051174")
query_1	FALSE	1	3465	26	5	0.192308	0.001443	GO:0010604	GO:BP	positive regulation of macromolecule metabolic process	21100	4750	c("GO:0009893", "GO:0043170", "GO:0060255")
query_1	FALSE	1	3361	26	8	0.307692	0.00238024	GO:0010605	GO:BP	negative regulation of macromolecule metabolic process	21100	4751	c("GO:0009892", "GO:0043170", "GO:0060255")
query_1	FALSE	1	1104	26	1	0.0384615	0.000905797	GO:0010608	GO:BP	post-transcriptional regulation of gene expression	21100	4754	GO:0010468
query_1	FALSE	1	1135	26	1	0.0384615	0.000881057	GO:0010628	GO:BP	positive regulation of gene expression	21100	4773	c("GO:0010467", "GO:0010468", "GO:0010604")
query_1	FALSE	1	1579	26	2	0.0769231	0.00126662	GO:0010629	GO:BP	negative regulation of gene expression	21100	4774	c("GO:0010467", "GO:0010468", "GO:0010605")
query_1	FALSE	1	509	26	1	0.0384615	0.00196464	GO:0010638	GO:BP	positive regulation of organelle organization	21100	4783	c("GO:0006996", "GO:0033043", "GO:0051130")
query_1	FALSE	1	5452	26	7	0.269231	0.00128393	GO:0010468	GO:BP	regulation of gene expression	21100	4649	c("GO:0010467", "GO:0060255")
query_1	FALSE	1	3336	26	5	0.192308	0.0014988	GO:0010646	GO:BP	regulation of cell communication	21100	4791	c("GO:0007154", "GO:0050794")
query_1	FALSE	1	1351	26	1	0.0384615	0.000740192	GO:0010648	GO:BP	negative regulation of cell communication	21100	4793	c("GO:0007154", "GO:0010646", "GO:0048523")
query_1	FALSE	1	31	26	1	0.0384615	0.0322581	GO:0010669	GO:BP	epithelial structure maintenance	21100	4813	GO:0001894
query_1	FALSE	1	94	26	1	0.0384615	0.0106383	GO:0010717	GO:BP	regulation of epithelial to mesenchymal transition	21100	4857	c("GO:0001837", "GO:0045595")
query_1	FALSE	1	35	26	1	0.0384615	0.0285714	GO:0010719	GO:BP	negative regulation of epithelial to mesenchymal transition	21100	4859	c("GO:0001837", "GO:0010717", "GO:0045596", "GO:0051241")
query_1	FALSE	1	502	26	3	0.115385	0.0059761	GO:0010817	GO:BP	regulation of hormone levels	21100	4951	GO:0065008
query_1	FALSE	1	40	26	1	0.0384615	0.025	GO:0010863	GO:BP	positive regulation of phospholipase C activity	21100	4984	c("GO:0010518", "GO:1900274")
query_1	FALSE	1	1592	26	3	0.115385	0.00188442	GO:0010941	GO:BP	regulation of cell death	21100	5062	c("GO:0008219", "GO:0050794")
query_1	FALSE	1	579	26	1	0.0384615	0.00172712	GO:0010942	GO:BP	positive regulation of cell death	21100	5063	c("GO:0008219", "GO:0010941", "GO:0048522")
query_1	FALSE	1	240	26	1	0.0384615	0.00416667	GO:0010951	GO:BP	negative regulation of endopeptidase activity	21100	5070	c("GO:0010466", "GO:0052548")
query_1	FALSE	1	392	26	1	0.0384615	0.00255102	GO:0010959	GO:BP	regulation of metal ion transport	21100	5077	c("GO:0030001", "GO:0043269")
query_1	FALSE	1	156	26	2	0.0769231	0.0128205	GO:0010970	GO:BP	transport along microtubule	21100	5087	c("GO:0030705", "GO:0099111")
query_1	FALSE	1	1918	26	3	0.115385	0.00156413	GO:0012501	GO:BP	programmed cell death	21100	5116	GO:0008219
query_1	FALSE	1	145	26	1	0.0384615	0.00689655	GO:0014065	GO:BP	phosphatidylinositol 3-kinase signaling	21100	5179	GO:0048015
query_1	FALSE	1	110	26	1	0.0384615	0.00909091	GO:0014066	GO:BP	regulation of phosphatidylinositol 3-kinase signaling	21100	5180	c("GO:0014065", "GO:1902531")
query_1	FALSE	1	1711	26	3	0.115385	0.00175336	GO:0010647	GO:BP	positive regulation of cell communication	21100	4792	c("GO:0007154", "GO:0010646", "GO:0048522")
query_1	FALSE	1	373	26	1	0.0384615	0.00268097	GO:0007159	GO:BP	leukocyte cell-cell adhesion	21100	3059	GO:0098609
query_1	FALSE	1	8963	26	7	0.269231	0.000780989	GO:0010467	GO:BP	gene expression	21100	4648	GO:0043170
query_1	FALSE	1	1010	26	1	0.0384615	0.000990099	GO:0010243	GO:BP	response to organonitrogen compound	21100	4496	c("GO:0010033", "GO:1901698")
query_1	FALSE	1	15	26	1	0.0384615	0.0666667	GO:0009209	GO:BP	pyrimidine ribonucleoside triphosphate biosynthetic process	21100	3807	c("GO:0009148", "GO:0009201", "GO:0009208")
query_1	FALSE	1	31	26	1	0.0384615	0.0322581	GO:0009218	GO:BP	pyrimidine ribonucleotide metabolic process	21100	3816	c("GO:0006220", "GO:0009259")
query_1	FALSE	1	23	26	1	0.0384615	0.0434783	GO:0009220	GO:BP	pyrimidine ribonucleotide biosynthetic process	21100	3818	c("GO:0006221", "GO:0009218", "GO:0009260")
query_1	FALSE	1	383	26	1	0.0384615	0.00261097	GO:0009259	GO:BP	ribonucleotide metabolic process	21100	3856	c("GO:0009117", "GO:0019693")
query_1	FALSE	1	182	26	1	0.0384615	0.00549451	GO:0009260	GO:BP	ribonucleotide biosynthetic process	21100	3857	c("GO:0009165", "GO:0009259", "GO:0046390")
query_1	FALSE	1	483	26	1	0.0384615	0.00207039	GO:0009593	GO:BP	detection of chemical stimulus	21100	3968	c("GO:0042221", "GO:0051606")
query_1	FALSE	1	2788	26	2	0.0769231	0.00071736	GO:0009605	GO:BP	response to external stimulus	21100	3977	GO:0050896
query_1	FALSE	1	1130	26	1	0.0384615	0.000884956	GO:0009628	GO:BP	response to abiotic stimulus	21100	3996	GO:0050896
query_1	FALSE	1	2702	26	5	0.192308	0.00185048	GO:0009653	GO:BP	anatomical structure morphogenesis	21100	4021	c("GO:0032502", "GO:0048856")
query_1	FALSE	1	1557	26	3	0.115385	0.00192678	GO:0009719	GO:BP	response to endogenous stimulus	21100	4067	GO:0050896
query_1	FALSE	1	839	26	3	0.115385	0.00357569	GO:0009725	GO:BP	response to hormone	21100	4073	c("GO:0009719", "GO:0010033")
query_1	FALSE	1	191	26	2	0.0769231	0.0104712	GO:0009755	GO:BP	hormone-mediated signaling pathway	21100	4103	c("GO:0007165", "GO:0032870")
query_1	FALSE	1	1110	26	2	0.0769231	0.0018018	GO:0009790	GO:BP	embryo development	21100	4132	GO:0007275
query_1	FALSE	1	89	26	1	0.0384615	0.011236	GO:0009791	GO:BP	post-embryonic development	21100	4133	c("GO:0007275", "GO:0032501")
query_1	FALSE	1	249	26	1	0.0384615	0.00401606	GO:0010466	GO:BP	negative regulation of peptidase activity	21100	4647	c("GO:0045861", "GO:0051346", "GO:0052547")
query_1	FALSE	1	674	26	2	0.0769231	0.00296736	GO:0009792	GO:BP	embryo development ending in birth or egg hatching	21100	4134	GO:0009790
query_1	FALSE	1	1940	26	5	0.192308	0.00257732	GO:0009888	GO:BP	tissue development	21100	4208	GO:0048856
query_1	FALSE	1	4145	26	7	0.269231	0.00168878	GO:0009889	GO:BP	regulation of biosynthetic process	21100	4209	c("GO:0009058", "GO:0019222")
query_1	FALSE	1	1595	26	5	0.192308	0.0031348	GO:0009890	GO:BP	negative regulation of biosynthetic process	21100	4210	c("GO:0009058", "GO:0009889", "GO:0009892")
query_1	FALSE	1	1999	26	4	0.153846	0.002001	GO:0009891	GO:BP	positive regulation of biosynthetic process	21100	4211	c("GO:0009058", "GO:0009889", "GO:0009893")
query_1	FALSE	1	3570	26	8	0.307692	0.0022409	GO:0009892	GO:BP	negative regulation of metabolic process	21100	4212	c("GO:0008152", "GO:0019222", "GO:0048519")
query_1	FALSE	1	3776	26	5	0.192308	0.00132415	GO:0009893	GO:BP	positive regulation of metabolic process	21100	4213	c("GO:0008152", "GO:0019222", "GO:0048518")
query_1	FALSE	1	1009	26	1	0.0384615	0.00099108	GO:0009894	GO:BP	regulation of catabolic process	21100	4214	c("GO:0009056", "GO:0019222")
query_1	FALSE	1	87	26	2	0.0769231	0.0229885	GO:0009953	GO:BP	dorsal/ventral pattern formation	21100	4253	GO:0003002
query_1	FALSE	1	2947	26	5	0.192308	0.00169664	GO:0009966	GO:BP	regulation of signal transduction	21100	4266	c("GO:0007165", "GO:0010646", "GO:0023051", "GO:0048583")
query_1	FALSE	1	1513	26	3	0.115385	0.00198282	GO:0009967	GO:BP	positive regulation of signal transduction	21100	4267	c("GO:0007165", "GO:0009966", "GO:0010647", "GO:0023056", "GO:0048584")
query_1	FALSE	1	1243	26	1	0.0384615	0.000804505	GO:0009968	GO:BP	negative regulation of signal transduction	21100	4268	c("GO:0007165", "GO:0009966", "GO:0010648", "GO:0023057", "GO:0048585")
query_1	FALSE	1	19395	26	24	0.923077	0.00123743	GO:0009987	GO:BP	cellular process	21100	4273	GO:0008150
query_1	FALSE	1	490	26	1	0.0384615	0.00204082	GO:0009991	GO:BP	response to extracellular stimulus	21100	4277	GO:0009605
query_1	FALSE	1	3010	26	4	0.153846	0.0013289	GO:0010033	GO:BP	response to organic substance	21100	4307	GO:0042221
query_1	FALSE	1	1072	26	5	0.192308	0.00466418	GO:0009887	GO:BP	animal organ morphogenesis	21100	4207	c("GO:0009653", "GO:0048513")
query_1	FALSE	1	1489	26	3	0.115385	0.00201478	GO:0007155	GO:BP	cell adhesion	21100	3055	GO:0009987
query_1	FALSE	1	6508	26	9	0.346154	0.00138291	GO:0007154	GO:BP	cell communication	21100	3054	GO:0009987
query_1	FALSE	1	1774	26	2	0.0769231	0.0011274	GO:0007049	GO:BP	cell cycle	21100	2963	GO:0009987
query_1	FALSE	1	22	26	1	0.0384615	0.0454545	GO:0002115	GO:BP	store-operated calcium entry	21100	811	GO:0006816
query_1	FALSE	1	173	26	1	0.0384615	0.00578035	GO:0002221	GO:BP	pattern recognition receptor signaling pathway	21100	878	GO:0002764
query_1	FALSE	1	120	26	1	0.0384615	0.00833333	GO:0002224	GO:BP	toll-like receptor signaling pathway	21100	881	GO:0002221
query_1	FALSE	1	150	26	1	0.0384615	0.00666667	GO:0002244	GO:BP	hematopoietic progenitor cell differentiation	21100	900	c("GO:0030097", "GO:0030154")
query_1	FALSE	1	661	26	1	0.0384615	0.00151286	GO:0002252	GO:BP	immune effector process	21100	907	GO:0002376
query_1	FALSE	1	289	26	1	0.0384615	0.00346021	GO:0002263	GO:BP	cell activation involved in immune response	21100	918	c("GO:0001775", "GO:0002252", "GO:0006955")
query_1	FALSE	1	201	26	1	0.0384615	0.00497512	GO:0002285	GO:BP	lymphocyte activation involved in immune response	21100	940	c("GO:0002366", "GO:0046649")
query_1	FALSE	1	114	26	1	0.0384615	0.00877193	GO:0002286	GO:BP	T cell activation involved in immune response	21100	941	c("GO:0002285", "GO:0042110")
query_1	FALSE	1	67	26	1	0.0384615	0.0149254	GO:0002287	GO:BP	alpha-beta T cell activation involved in immune response	21100	942	c("GO:0002286", "GO:0046631")
query_1	FALSE	1	75	26	1	0.0384615	0.0133333	GO:0002292	GO:BP	T cell differentiation involved in immune response	21100	947	c("GO:0002286", "GO:0030217")
query_1	FALSE	1	67	26	1	0.0384615	0.0149254	GO:0002293	GO:BP	alpha-beta T cell differentiation involved in immune response	21100	948	c("GO:0002287", "GO:0002292", "GO:0046632")
query_1	FALSE	1	66	26	1	0.0384615	0.0151515	GO:0002294	GO:BP	CD4-positive, alpha-beta T cell differentiation involved in immune response	21100	949	c("GO:0002293", "GO:0043367")
query_1	FALSE	1	285	26	1	0.0384615	0.00350877	GO:0002366	GO:BP	leukocyte activation involved in immune response	21100	1021	c("GO:0002263", "GO:0045321")
query_1	FALSE	1	2781	26	4	0.153846	0.00143833	GO:0002376	GO:BP	immune system process	21100	1029	GO:0008150
query_1	FALSE	1	16	26	1	0.0384615	0.0625	GO:0002070	GO:BP	epithelial cell maturation	21100	779	c("GO:0002064", "GO:0048469")
query_1	FALSE	1	6	26	1	0.0384615	0.166667	GO:0002428	GO:BP	antigen processing and presentation of peptide antigen via MHC class Ib	21100	1074	c("GO:0002475", "GO:0048002")
query_1	FALSE	1	5	26	1	0.0384615	0.2	GO:0002476	GO:BP	antigen processing and presentation of endogenous peptide antigen via MHC class Ib	21100	1122	c("GO:0002428", "GO:0002483")
query_1	FALSE	1	19	26	1	0.0384615	0.0526316	GO:0002483	GO:BP	antigen processing and presentation of endogenous peptide antigen	21100	1129	c("GO:0019883", "GO:0048002")
query_1	FALSE	1	996	26	2	0.0769231	0.00200803	GO:0002520	GO:BP	immune system development	21100	1165	c("GO:0002376", "GO:0048731")
query_1	FALSE	1	563	26	1	0.0384615	0.0017762	GO:0002521	GO:BP	leukocyte differentiation	21100	1166	c("GO:0030097", "GO:0030154")
query_1	FALSE	1	115	26	1	0.0384615	0.00869565	GO:0002526	GO:BP	acute inflammatory response	21100	1171	GO:0006954
query_1	FALSE	1	1442	26	2	0.0769231	0.00138696	GO:0002682	GO:BP	regulation of immune system process	21100	1323	c("GO:0002376", "GO:0050789")
query_1	FALSE	1	936	26	1	0.0384615	0.00106838	GO:0002684	GO:BP	positive regulation of immune system process	21100	1325	c("GO:0002376", "GO:0002682", "GO:0048518")
query_1	FALSE	1	620	26	1	0.0384615	0.0016129	GO:0002694	GO:BP	regulation of leukocyte activation	21100	1335	c("GO:0002682", "GO:0045321", "GO:0050865")
query_1	FALSE	1	415	26	1	0.0384615	0.00240964	GO:0002696	GO:BP	positive regulation of leukocyte activation	21100	1337	c("GO:0002684", "GO:0002694", "GO:0045321", "GO:0050867")
query_1	FALSE	1	349	26	1	0.0384615	0.00286533	GO:0002697	GO:BP	regulation of immune effector process	21100	1338	c("GO:0002252", "GO:0002682")
query_1	FALSE	1	241	26	1	0.0384615	0.00414938	GO:0002699	GO:BP	positive regulation of immune effector process	21100	1340	c("GO:0002252", "GO:0002684", "GO:0002697")
query_1	FALSE	1	497	26	1	0.0384615	0.00201207	GO:0002764	GO:BP	immune response-regulating signaling pathway	21100	1399	c("GO:0007165", "GO:0050776")
query_1	FALSE	1	355	26	2	0.0769231	0.0056338	GO:0003002	GO:BP	regionalization	21100	1578	GO:0007389
query_1	FALSE	1	1013	26	6	0.230769	0.005923	GO:0003006	GO:BP	developmental process involved in reproduction	21100	1582	c("GO:0022414", "GO:0032502")
query_1	FALSE	1	13	26	1	0.0384615	0.0769231	GO:0002475	GO:BP	antigen processing and presentation via MHC class Ib	21100	1121	GO:0019882
query_1	FALSE	1	2235	26	4	0.153846	0.00178971	GO:0003008	GO:BP	system process	21100	1584	GO:0032501
query_1	FALSE	1	55	26	1	0.0384615	0.0181818	GO:0002067	GO:BP	glandular epithelial cell differentiation	21100	776	GO:0002065
query_1	FALSE	1	206	26	2	0.0769231	0.00970874	GO:0002064	GO:BP	epithelial cell development	21100	773	c("GO:0030855", "GO:0048468")
query_1	FALSE	1	941	26	4	0.153846	0.0042508	GO:0000122	GO:BP	negative regulation of transcription by RNA polymerase II	21100	64	c("GO:0006357", "GO:0006366", "GO:0045892")
query_1	FALSE	1	630	26	1	0.0384615	0.0015873	GO:0000226	GO:BP	microtubule cytoskeleton organization	21100	103	c("GO:0007010", "GO:0007017")
query_1	FALSE	1	906	26	2	0.0769231	0.00220751	GO:0000278	GO:BP	mitotic cell cycle	21100	118	GO:0007049
query_1	FALSE	1	1012	26	1	0.0384615	0.000988142	GO:0000902	GO:BP	cell morphogenesis	21100	307	GO:0009653
query_1	FALSE	1	535	26	2	0.0769231	0.00373832	GO:0001501	GO:BP	skeletal system development	21100	423	GO:0048731
query_1	FALSE	1	413	26	1	0.0384615	0.00242131	GO:0001503	GO:BP	ossification	21100	425	GO:0032501
query_1	FALSE	1	153	26	1	0.0384615	0.00653595	GO:0001539	GO:BP	cilium or flagellum-dependent cell motility	21100	439	GO:0048870
query_1	FALSE	1	57	26	1	0.0384615	0.0175439	GO:0001541	GO:BP	ovarian follicle development	21100	440	c("GO:0008585", "GO:0048608")
query_1	FALSE	1	10	26	1	0.0384615	0.1	GO:0001547	GO:BP	antral ovarian follicle growth	21100	446	c("GO:0001541", "GO:0003006", "GO:0022602", "GO:0048589")
query_1	FALSE	1	119	26	1	0.0384615	0.00840336	GO:0001578	GO:BP	microtubule bundle formation	21100	472	GO:0000226
query_1	FALSE	1	37	26	1	0.0384615	0.027027	GO:0001580	GO:BP	detection of chemical stimulus involved in sensory perception of bitter taste	21100	474	c("GO:0050912", "GO:0050913")
query_1	FALSE	1	229	26	1	0.0384615	0.00436681	GO:0001649	GO:BP	osteoblast differentiation	21100	478	c("GO:0001503", "GO:0030154")
query_1	FALSE	1	390	26	1	0.0384615	0.0025641	GO:0001654	GO:BP	eye development	21100	479	c("GO:0007423", "GO:0150063")
query_1	FALSE	1	355	26	3	0.115385	0.0084507	GO:0001655	GO:BP	urogenital system development	21100	480	GO:0048731
query_1	FALSE	1	93	26	1	0.0384615	0.0107527	GO:0002065	GO:BP	columnar/cuboidal epithelial cell differentiation	21100	774	GO:0030855
query_1	FALSE	1	302	26	1	0.0384615	0.00331126	GO:0001666	GO:BP	response to hypoxia	21100	488	c("GO:0006950", "GO:0036293")
query_1	FALSE	1	394	26	1	0.0384615	0.00253807	GO:0001701	GO:BP	in utero embryonic development	21100	504	GO:0043009
query_1	FALSE	1	101	26	1	0.0384615	0.00990099	GO:0001708	GO:BP	cell fate specification	21100	511	c("GO:0045165", "GO:0048869")
query_1	FALSE	1	197	26	2	0.0769231	0.0101523	GO:0001763	GO:BP	morphogenesis of a branching structure	21100	541	c("GO:0009653", "GO:0032501")
query_1	FALSE	1	1094	26	1	0.0384615	0.000914077	GO:0001775	GO:BP	cell activation	21100	552	GO:0009987
query_1	FALSE	1	305	26	1	0.0384615	0.00327869	GO:0001822	GO:BP	kidney development	21100	591	c("GO:0048513", "GO:0072001")
query_1	FALSE	1	154	26	1	0.0384615	0.00649351	GO:0001837	GO:BP	epithelial to mesenchymal transition	21100	606	GO:0048762
query_1	FALSE	1	148	26	1	0.0384615	0.00675676	GO:0001890	GO:BP	placenta development	21100	629	c("GO:0048513", "GO:0048608")
query_1	FALSE	1	33	26	1	0.0384615	0.030303	GO:0001893	GO:BP	maternal placenta development	21100	631	c("GO:0001890", "GO:0003006", "GO:0048856", "GO:0060135")
query_1	FALSE	1	277	26	2	0.0769231	0.00722022	GO:0001894	GO:BP	tissue homeostasis	21100	632	c("GO:0048871", "GO:0060249")
query_1	FALSE	1	79	26	1	0.0384615	0.0126582	GO:0001895	GO:BP	retina homeostasis	21100	633	GO:0001894
query_1	FALSE	1	1097	26	1	0.0384615	0.000911577	GO:0001932	GO:BP	regulation of protein phosphorylation	21100	662	c("GO:0006468", "GO:0031399", "GO:0042325")
query_1	FALSE	1	735	26	1	0.0384615	0.00136054	GO:0001934	GO:BP	positive regulation of protein phosphorylation	21100	664	c("GO:0001932", "GO:0006468", "GO:0031401", "GO:0042327")
query_1	FALSE	1	535	26	2	0.0769231	0.00373832	GO:0002009	GO:BP	morphogenesis of an epithelium	21100	729	c("GO:0048729", "GO:0060429")
query_1	FALSE	1	115	26	1	0.0384615	0.00869565	GO:0002062	GO:BP	chondrocyte differentiation	21100	771	c("GO:0030154", "GO:0051216")
query_1	FALSE	1	110	26	1	0.0384615	0.00909091	GO:0001676	GO:BP	long-chain fatty acid metabolic process	21100	491	GO:0006631
query_1	FALSE	1	901	26	3	0.115385	0.00332963	GO:0014070	GO:BP	response to organic cyclic compound	21100	5183	GO:0010033
query_1	FALSE	1	587	26	1	0.0384615	0.00170358	GO:0003013	GO:BP	circulatory system process	21100	1589	GO:0003008
query_1	FALSE	1	191	26	3	0.115385	0.0157068	GO:0003341	GO:BP	cilium movement	21100	1910	GO:0007018
query_1	FALSE	1	119	26	1	0.0384615	0.00840336	GO:0006690	GO:BP	icosanoid metabolic process	21100	2658	GO:0019752
query_1	FALSE	1	8224	26	8	0.307692	0.000972763	GO:0006725	GO:BP	cellular aromatic compound metabolic process	21100	2692	GO:0044237
query_1	FALSE	1	495	26	1	0.0384615	0.0020202	GO:0006753	GO:BP	nucleoside phosphate metabolic process	21100	2716	c("GO:0006796", "GO:0019637", "GO:0055086")
query_1	FALSE	1	2803	26	4	0.153846	0.00142704	GO:0006793	GO:BP	phosphorus metabolic process	21100	2749	GO:0044237
query_1	FALSE	1	2781	26	4	0.153846	0.00143833	GO:0006796	GO:BP	phosphate-containing compound metabolic process	21100	2752	GO:0006793
query_1	FALSE	1	12153	26	13	0.5	0.00106969	GO:0006807	GO:BP	nitrogen compound metabolic process	21100	2763	GO:0008152
query_1	FALSE	1	4742	26	6	0.230769	0.00126529	GO:0006810	GO:BP	transport	21100	2766	GO:0051234
query_1	FALSE	1	1551	26	1	0.0384615	0.000644745	GO:0006811	GO:BP	ion transport	21100	2767	GO:0006810
query_1	FALSE	1	1173	26	1	0.0384615	0.000852515	GO:0006812	GO:BP	cation transport	21100	2768	GO:0006811
query_1	FALSE	1	423	26	1	0.0384615	0.00236407	GO:0006816	GO:BP	calcium ion transport	21100	2772	GO:0030001
query_1	FALSE	1	44	26	1	0.0384615	0.0227273	GO:0006858	GO:BP	extracellular transport	21100	2806	GO:0006810
query_1	FALSE	1	506	26	1	0.0384615	0.00197628	GO:0006873	GO:BP	cellular ion homeostasis	21100	2816	c("GO:0050801", "GO:0055082")
query_1	FALSE	1	287	26	1	0.0384615	0.00348432	GO:0006874	GO:BP	cellular calcium ion homeostasis	21100	2817	c("GO:0006875", "GO:0055074", "GO:0072503")
query_1	FALSE	1	418	26	1	0.0384615	0.00239234	GO:0006875	GO:BP	cellular metal ion homeostasis	21100	2818	c("GO:0030003", "GO:0055065")
query_1	FALSE	1	131	26	1	0.0384615	0.00763359	GO:0006639	GO:BP	acylglycerol metabolic process	21100	2610	c("GO:0006638", "GO:0046486")
query_1	FALSE	1	1084	26	2	0.0769231	0.00184502	GO:0006886	GO:BP	intracellular protein transport	21100	2829	c("GO:0015031", "GO:0034613", "GO:0046907")
query_1	FALSE	1	641	26	1	0.0384615	0.00156006	GO:0006897	GO:BP	endocytosis	21100	2840	GO:0016192
query_1	FALSE	1	541	26	1	0.0384615	0.00184843	GO:0006914	GO:BP	autophagy	21100	2854	c("GO:0044248", "GO:0061919")
query_1	FALSE	1	1865	26	3	0.115385	0.00160858	GO:0006915	GO:BP	apoptotic process	21100	2855	GO:0012501
query_1	FALSE	1	2085	26	6	0.230769	0.0028777	GO:0006928	GO:BP	movement of cell or subcellular component	21100	2866	GO:0009987
query_1	FALSE	1	3851	26	3	0.115385	0.000779018	GO:0006950	GO:BP	response to stress	21100	2884	GO:0050896
query_1	FALSE	1	1736	26	2	0.0769231	0.00115207	GO:0006952	GO:BP	defense response	21100	2885	GO:0006950
query_1	FALSE	1	50	26	1	0.0384615	0.02	GO:0006953	GO:BP	acute-phase response	21100	2886	GO:0002526
query_1	FALSE	1	778	26	2	0.0769231	0.00257069	GO:0006954	GO:BP	inflammatory response	21100	2887	GO:0006952
query_1	FALSE	1	1906	26	2	0.0769231	0.00104932	GO:0006955	GO:BP	immune response	21100	2888	c("GO:0002376", "GO:0050896")
query_1	FALSE	1	420	26	1	0.0384615	0.00238095	GO:0006979	GO:BP	response to oxidative stress	21100	2908	GO:0006950
query_1	FALSE	1	138	26	1	0.0384615	0.00724638	GO:0006986	GO:BP	response to unfolded protein	21100	2913	GO:0035966
query_1	FALSE	1	3874	26	7	0.269231	0.00180692	GO:0006996	GO:BP	organelle organization	21100	2920	GO:0016043
query_1	FALSE	1	1453	26	1	0.0384615	0.000688231	GO:0007010	GO:BP	cytoskeleton organization	21100	2933	GO:0006996
query_1	FALSE	1	904	26	5	0.192308	0.00553097	GO:0007017	GO:BP	microtubule-based process	21100	2938	GO:0009987
query_1	FALSE	1	360	26	1	0.0384615	0.00277778	GO:0006887	GO:BP	exocytosis	21100	2830	c("GO:0016192", "GO:0032940")
query_1	FALSE	1	260	26	1	0.0384615	0.00384615	GO:0003018	GO:BP	vascular process in circulatory system	21100	1594	GO:0003013
query_1	FALSE	1	132	26	1	0.0384615	0.00757576	GO:0006638	GO:BP	neutral lipid metabolic process	21100	2609	GO:0044255
query_1	FALSE	1	1392	26	3	0.115385	0.00215517	GO:0006629	GO:BP	lipid metabolic process	21100	2601	c("GO:0044238", "GO:0071704")
query_1	FALSE	1	41	26	1	0.0384615	0.0243902	GO:0003351	GO:BP	epithelial cilium movement involved in extracellular fluid movement	21100	1920	c("GO:0003341", "GO:0006858", "GO:0099111")
query_1	FALSE	1	29	26	1	0.0384615	0.0344828	GO:0003401	GO:BP	axis elongation	21100	1970	GO:0060560
query_1	FALSE	1	16	26	1	0.0384615	0.0625	GO:0003413	GO:BP	chondrocyte differentiation involved in endochondral bone morphogenesis	21100	1982	c("GO:0002062", "GO:0060351")
query_1	FALSE	1	988	26	1	0.0384615	0.00101215	GO:0006082	GO:BP	organic acid metabolic process	21100	2114	c("GO:0044237", "GO:0044281", "GO:0071704")
query_1	FALSE	1	7998	26	8	0.307692	0.00100025	GO:0006139	GO:BP	nucleobase-containing compound metabolic process	21100	2164	c("GO:0006725", "GO:0034641", "GO:0044238", "GO:0046483", "GO:1901360")
query_1	FALSE	1	391	26	1	0.0384615	0.00255754	GO:0006163	GO:BP	purine nucleotide metabolic process	21100	2183	c("GO:0009117", "GO:0072521")
query_1	FALSE	1	190	26	1	0.0384615	0.00526316	GO:0006164	GO:BP	purine nucleotide biosynthetic process	21100	2184	c("GO:0006163", "GO:0009165", "GO:0072522")
query_1	FALSE	1	100	26	1	0.0384615	0.01	GO:0006165	GO:BP	nucleoside diphosphate phosphorylation	21100	2185	c("GO:0009117", "GO:0009132", "GO:0046939")
query_1	FALSE	1	11	26	1	0.0384615	0.0909091	GO:0006183	GO:BP	GTP biosynthetic process	21100	2203	c("GO:0009152", "GO:0009206", "GO:0046039")
query_1	FALSE	1	53	26	1	0.0384615	0.0188679	GO:0006220	GO:BP	pyrimidine nucleotide metabolic process	21100	2239	c("GO:0009117", "GO:0072527")
query_1	FALSE	1	32	26	1	0.0384615	0.03125	GO:0006221	GO:BP	pyrimidine nucleotide biosynthetic process	21100	2240	c("GO:0006220", "GO:0009165", "GO:0072528")
query_1	FALSE	1	10	26	1	0.0384615	0.1	GO:0006228	GO:BP	UTP biosynthetic process	21100	2247	c("GO:0009209", "GO:0009220", "GO:0046051")
query_1	FALSE	1	14	26	1	0.0384615	0.0714286	GO:0006241	GO:BP	CTP biosynthetic process	21100	2260	c("GO:0009209", "GO:0009220", "GO:0046036")
query_1	FALSE	1	626	26	4	0.153846	0.00638978	GO:0006325	GO:BP	chromatin organization	21100	2333	c("GO:0016043", "GO:0051276")
query_1	FALSE	1	392	26	1	0.0384615	0.00255102	GO:0006631	GO:BP	fatty acid metabolic process	21100	2603	c("GO:0032787", "GO:0044255")
query_1	FALSE	1	3579	26	6	0.230769	0.00167645	GO:0006351	GO:BP	transcription, DNA-templated	21100	2349	GO:0097659
query_1	FALSE	1	3451	26	6	0.230769	0.00173863	GO:0006355	GO:BP	regulation of transcription, DNA-templated	21100	2353	c("GO:0006351", "GO:0010468", "GO:1903506")
query_1	FALSE	1	2559	26	5	0.192308	0.00195389	GO:0006357	GO:BP	regulation of transcription by RNA polymerase II	21100	2355	c("GO:0006355", "GO:0006366")
query_1	FALSE	1	2653	26	5	0.192308	0.00188466	GO:0006366	GO:BP	transcription by RNA polymerase II	21100	2362	GO:0006351
query_1	FALSE	1	97	26	1	0.0384615	0.0103093	GO:0006367	GO:BP	transcription initiation from RNA polymerase II promoter	21100	2363	c("GO:0006352", "GO:0006366")
query_1	FALSE	1	3357	26	1	0.0384615	0.000297885	GO:0006396	GO:BP	RNA processing	21100	2387	c("GO:0010467", "GO:0016070")
query_1	FALSE	1	214	26	1	0.0384615	0.0046729	GO:0006457	GO:BP	protein folding	21100	2437	GO:0009987
query_1	FALSE	1	3719	26	7	0.269231	0.00188223	GO:0006464	GO:BP	cellular protein modification process	21100	2443	c("GO:0036211", "GO:0044267")
query_1	FALSE	1	1587	26	3	0.115385	0.00189036	GO:0006468	GO:BP	protein phosphorylation	21100	2446	c("GO:0006464", "GO:0016310")
query_1	FALSE	1	121	26	1	0.0384615	0.00826446	GO:0006476	GO:BP	protein deacetylation	21100	2453	GO:0035601
query_1	FALSE	1	204	26	2	0.0769231	0.00980392	GO:0006479	GO:BP	protein methylation	21100	2456	c("GO:0008213", "GO:0043414")
query_1	FALSE	1	35	26	1	0.0384615	0.0285714	GO:0006482	GO:BP	protein demethylation	21100	2459	c("GO:0008214", "GO:0070988")
query_1	FALSE	1	1787	26	2	0.0769231	0.00111919	GO:0006508	GO:BP	proteolysis	21100	2483	GO:0019538
query_1	FALSE	1	675	26	1	0.0384615	0.00148148	GO:0006511	GO:BP	ubiquitin-dependent protein catabolic process	21100	2486	GO:0019941
query_1	FALSE	1	78	26	1	0.0384615	0.0128205	GO:0006513	GO:BP	protein monoubiquitination	21100	2488	GO:0016567
query_1	FALSE	1	150	26	1	0.0384615	0.00666667	GO:0006352	GO:BP	DNA-templated transcription, initiation	21100	2350	c("GO:0006351", "GO:0032774")
query_1	FALSE	1	1778	26	3	0.115385	0.00168729	GO:0015031	GO:BP	protein transport	21100	5347	c("GO:0045184", "GO:0071702", "GO:0071705")
query_1	FALSE	1	419	26	1	0.0384615	0.00238663	GO:0016032	GO:BP	viral process	21100	5639	GO:0008150
query_1	FALSE	1	336	26	1	0.0384615	0.00297619	GO:0016042	GO:BP	lipid catabolic process	21100	5644	c("GO:0006629", "GO:1901575")
query_1	FALSE	1	13	26	1	0.0384615	0.0769231	GO:0035721	GO:BP	intraciliary retrograde transport	21100	10580	GO:0042073
query_1	FALSE	1	10	26	1	0.0384615	0.1	GO:0035860	GO:BP	glial cell-derived neurotrophic factor receptor signaling pathway	21100	10690	GO:0007169
query_1	FALSE	1	159	26	1	0.0384615	0.00628931	GO:0035966	GO:BP	response to topologically incorrect protein	21100	10783	c("GO:0006950", "GO:0010033")
query_1	FALSE	1	118	26	1	0.0384615	0.00847458	GO:0035967	GO:BP	cellular response to topologically incorrect protein	21100	10784	c("GO:0033554", "GO:0035966", "GO:0071310")
query_1	FALSE	1	26	26	1	0.0384615	0.0384615	GO:0035988	GO:BP	chondrocyte proliferation	21100	10800	GO:0008283
query_1	FALSE	1	18	26	1	0.0384615	0.0555556	GO:0036124	GO:BP	histone H3-K9 trimethylation	21100	10890	c("GO:0018023", "GO:0051567")
query_1	FALSE	1	21	26	1	0.0384615	0.047619	GO:0036158	GO:BP	outer dynein arm assembly	21100	10905	GO:0070286
query_1	FALSE	1	16	26	1	0.0384615	0.0625	GO:0036159	GO:BP	inner dynein arm assembly	21100	10906	GO:0070286
query_1	FALSE	1	3719	26	7	0.269231	0.00188223	GO:0036211	GO:BP	protein modification process	21100	10936	c("GO:0019538", "GO:0043412")
query_1	FALSE	1	315	26	1	0.0384615	0.0031746	GO:0036293	GO:BP	response to decreased oxygen levels	21100	10995	GO:0070482
query_1	FALSE	1	165	26	1	0.0384615	0.00606061	GO:0036294	GO:BP	cellular response to decreased oxygen levels	21100	10996	c("GO:0036293", "GO:0071453")
query_1	FALSE	1	74	26	1	0.0384615	0.0135135	GO:0036465	GO:BP	synaptic vesicle recycling	21100	11077	c("GO:0006810", "GO:0051649", "GO:0099504")
query_1	FALSE	1	38	26	1	0.0384615	0.0263158	GO:0038179	GO:BP	neurotrophin signaling pathway	21100	11240	c("GO:0007166", "GO:0071363")
query_1	FALSE	1	37	26	1	0.0384615	0.027027	GO:0039694	GO:BP	viral RNA genome replication	21100	11427	GO:0019079
query_1	FALSE	1	103	26	1	0.0384615	0.00970874	GO:0035710	GO:BP	CD4-positive, alpha-beta T cell activation	21100	10573	GO:0046631
query_1	FALSE	1	959	26	2	0.0769231	0.00208551	GO:0040007	GO:BP	growth	21100	11454	GO:0008150
query_1	FALSE	1	1833	26	2	0.0769231	0.00109111	GO:0040011	GO:BP	locomotion	21100	11458	GO:0008150
query_1	FALSE	1	67	26	1	0.0384615	0.0149254	GO:0040014	GO:BP	regulation of multicellular organism growth	21100	11461	c("GO:0035264", "GO:0048638", "GO:0051239")
query_1	FALSE	1	12	26	1	0.0384615	0.0833333	GO:0040015	GO:BP	negative regulation of multicellular organism growth	21100	11462	c("GO:0035264", "GO:0040014", "GO:0048640", "GO:0051241")
query_1	FALSE	1	40	26	1	0.0384615	0.025	GO:0042073	GO:BP	intraciliary transport	21100	11520	c("GO:0010970", "GO:0031503", "GO:0044782")
query_1	FALSE	1	64	26	1	0.0384615	0.015625	GO:0042093	GO:BP	T-helper cell differentiation	21100	11532	GO:0002294
query_1	FALSE	1	504	26	1	0.0384615	0.00198413	GO:0042110	GO:BP	T cell activation	21100	11538	GO:0046649
query_1	FALSE	1	1658	26	4	0.153846	0.00241255	GO:0042127	GO:BP	regulation of cell population proliferation	21100	11549	c("GO:0008283", "GO:0050794")
query_1	FALSE	1	4336	26	5	0.192308	0.00115314	GO:0042221	GO:BP	response to chemical	21100	11621	GO:0050896
query_1	FALSE	1	81	26	1	0.0384615	0.0123457	GO:0042310	GO:BP	vasoconstriction	21100	11658	GO:0097746
query_1	FALSE	1	1242	26	1	0.0384615	0.000805153	GO:0042325	GO:BP	regulation of phosphorylation	21100	11668	c("GO:0016310", "GO:0019220")
query_1	FALSE	1	816	26	1	0.0384615	0.00122549	GO:0042327	GO:BP	positive regulation of phosphorylation	21100	11670	c("GO:0016310", "GO:0042325", "GO:0045937")
query_1	FALSE	1	232	26	3	0.115385	0.012931	GO:0042445	GO:BP	hormone metabolic process	21100	11762	c("GO:0008152", "GO:0010817")
query_1	FALSE	1	66	26	1	0.0384615	0.0151515	GO:0042446	GO:BP	hormone biosynthetic process	21100	11763	c("GO:0009058", "GO:0042445")
query_1	FALSE	1	127	26	1	0.0384615	0.00787402	GO:0042471	GO:BP	ear morphogenesis	21100	11783	c("GO:0043583", "GO:0048562", "GO:0090596")
query_1	FALSE	1	665	26	1	0.0384615	0.00150376	GO:0040008	GO:BP	regulation of growth	21100	11455	c("GO:0040007", "GO:0050789")
query_1	FALSE	1	91	26	1	0.0384615	0.010989	GO:0042475	GO:BP	odontogenesis of dentin-containing tooth	21100	11787	GO:0042476
query_1	FALSE	1	132	26	1	0.0384615	0.00757576	GO:0035601	GO:BP	protein deacylation	21100	10493	c("GO:0006464", "GO:0098732")
query_1	FALSE	1	69	26	1	0.0384615	0.0144928	GO:0035418	GO:BP	protein localization to synapse	21100	10373	GO:1902414
query_1	FALSE	1	1109	26	4	0.153846	0.00360685	GO:0033365	GO:BP	protein localization to organelle	21100	9400	GO:0034613
query_1	FALSE	1	241	26	1	0.0384615	0.00414938	GO:0033500	GO:BP	carbohydrate homeostasis	21100	9469	GO:0048878
query_1	FALSE	1	1875	26	1	0.0384615	0.000533333	GO:0033554	GO:BP	cellular response to stress	21100	9518	c("GO:0006950", "GO:0051716")
query_1	FALSE	1	112	26	1	0.0384615	0.00892857	GO:0033559	GO:BP	unsaturated fatty acid metabolic process	21100	9520	GO:0006631
query_1	FALSE	1	28	26	1	0.0384615	0.0357143	GO:0033598	GO:BP	mammary gland epithelial cell proliferation	21100	9545	c("GO:0050673", "GO:0061180")
query_1	FALSE	1	879	26	3	0.115385	0.00341297	GO:0033993	GO:BP	response to lipid	21100	9631	GO:0010033
query_1	FALSE	1	71	26	1	0.0384615	0.0140845	GO:0034121	GO:BP	regulation of toll-like receptor signaling pathway	21100	9689	c("GO:0002224", "GO:0062207")
query_1	FALSE	1	429	26	1	0.0384615	0.002331	GO:0034470	GO:BP	ncRNA processing	21100	9936	c("GO:0006396", "GO:0034660")
query_1	FALSE	1	98	26	1	0.0384615	0.0102041	GO:0034502	GO:BP	protein localization to chromosome	21100	9957	GO:0033365
query_1	FALSE	1	1913	26	6	0.230769	0.00313643	GO:0034613	GO:BP	cellular protein localization	21100	9981	c("GO:0008104", "GO:0070727")
query_1	FALSE	1	99	26	1	0.0384615	0.010101	GO:0034620	GO:BP	cellular response to unfolded protein	21100	9984	c("GO:0006986", "GO:0035967")
query_1	FALSE	1	8829	26	8	0.307692	0.000906105	GO:0034641	GO:BP	cellular nitrogen compound metabolic process	21100	9997	c("GO:0006807", "GO:0044237")
query_1	FALSE	1	3984	26	7	0.269231	0.00175703	GO:0034654	GO:BP	nucleobase-containing compound biosynthetic process	21100	10006	c("GO:0006139", "GO:0018130", "GO:0019438", "GO:0044271", "GO:1901362")
query_1	FALSE	1	568	26	1	0.0384615	0.00176056	GO:0034660	GO:BP	ncRNA metabolic process	21100	10010	GO:0016070
query_1	FALSE	1	2629	26	4	0.153846	0.00152149	GO:0035556	GO:BP	intracellular signal transduction	21100	10463	GO:0007165
query_1	FALSE	1	138	26	1	0.0384615	0.00724638	GO:0034754	GO:BP	cellular hormone metabolic process	21100	10030	c("GO:0042445", "GO:0044237")
query_1	FALSE	1	258	26	1	0.0384615	0.00387597	GO:0034976	GO:BP	response to endoplasmic reticulum stress	21100	10062	GO:0033554
query_1	FALSE	1	88	26	1	0.0384615	0.0113636	GO:0035082	GO:BP	axoneme assembly	21100	10124	c("GO:0001578", "GO:0022607", "GO:0060271")
query_1	FALSE	1	144	26	1	0.0384615	0.00694444	GO:0035107	GO:BP	appendage morphogenesis	21100	10137	c("GO:0009653", "GO:0048736")
query_1	FALSE	1	144	26	1	0.0384615	0.00694444	GO:0035108	GO:BP	limb morphogenesis	21100	10138	c("GO:0035107", "GO:0060173")
query_1	FALSE	1	121	26	1	0.0384615	0.00826446	GO:0035113	GO:BP	embryonic appendage morphogenesis	21100	10143	c("GO:0035107", "GO:0048598")
query_1	FALSE	1	140	26	1	0.0384615	0.00714286	GO:0035150	GO:BP	regulation of tube size	21100	10177	GO:0090066
query_1	FALSE	1	634	26	1	0.0384615	0.00157729	GO:0035194	GO:BP	post-transcriptional gene silencing by RNA	21100	10214	c("GO:0016441", "GO:0031047")
query_1	FALSE	1	625	26	1	0.0384615	0.0016	GO:0035195	GO:BP	miRNA-mediated gene silencing	21100	10215	GO:0035194
query_1	FALSE	1	49	26	1	0.0384615	0.0204082	GO:0035196	GO:BP	miRNA maturation	21100	10216	GO:0070918
query_1	FALSE	1	854	26	2	0.0769231	0.00234192	GO:0035239	GO:BP	tube morphogenesis	21100	10253	c("GO:0009653", "GO:0035295")
query_1	FALSE	1	151	26	1	0.0384615	0.00662252	GO:0035264	GO:BP	multicellular organism growth	21100	10262	c("GO:0032501", "GO:0048589")
query_1	FALSE	1	156	26	1	0.0384615	0.00641026	GO:0035265	GO:BP	organ growth	21100	10263	c("GO:0032501", "GO:0048589")
query_1	FALSE	1	1054	26	3	0.115385	0.0028463	GO:0035295	GO:BP	tube development	21100	10287	c("GO:0007275", "GO:0048856")
query_1	FALSE	1	139	26	1	0.0384615	0.00719424	GO:0035296	GO:BP	regulation of tube diameter	21100	10288	GO:0035150
query_1	FALSE	1	130	26	2	0.0769231	0.0153846	GO:0034968	GO:BP	histone lysine methylation	21100	10056	c("GO:0016571", "GO:0018022")
query_1	FALSE	1	35	26	1	0.0384615	0.0285714	GO:0033280	GO:BP	response to vitamin D	21100	9336	c("GO:0014070", "GO:0033273", "GO:0033993", "GO:1901700")
query_1	FALSE	1	134	26	1	0.0384615	0.00746269	GO:0042476	GO:BP	odontogenesis	21100	11788	GO:0009887
query_1	FALSE	1	240	26	1	0.0384615	0.00416667	GO:0042593	GO:BP	glucose homeostasis	21100	11833	GO:0033500
query_1	FALSE	1	946	26	2	0.0769231	0.00211416	GO:0044087	GO:BP	regulation of cellular component biogenesis	21100	12628	c("GO:0044085", "GO:0050794")
query_1	FALSE	1	497	26	2	0.0769231	0.00402414	GO:0044089	GO:BP	positive regulation of cellular component biogenesis	21100	12630	c("GO:0044085", "GO:0044087", "GO:0048522")
query_1	FALSE	1	1112	26	2	0.0769231	0.00179856	GO:0044092	GO:BP	negative regulation of molecular function	21100	12633	GO:0065009
query_1	FALSE	1	1556	26	4	0.153846	0.00257069	GO:0044093	GO:BP	positive regulation of molecular function	21100	12634	GO:0065009
query_1	FALSE	1	12865	26	15	0.576923	0.00116595	GO:0044237	GO:BP	cellular metabolic process	21100	12684	c("GO:0008152", "GO:0009987")
query_1	FALSE	1	12674	26	14	0.538462	0.00110462	GO:0044238	GO:BP	primary metabolic process	21100	12685	GO:0008152
query_1	FALSE	1	221	26	1	0.0384615	0.00452489	GO:0044242	GO:BP	cellular lipid catabolic process	21100	12688	c("GO:0016042", "GO:0044248", "GO:0044255")
query_1	FALSE	1	2199	26	2	0.0769231	0.000909504	GO:0044248	GO:BP	cellular catabolic process	21100	12691	c("GO:0009056", "GO:0044237")
query_1	FALSE	1	5700	26	8	0.307692	0.00140351	GO:0044249	GO:BP	cellular biosynthetic process	21100	12692	c("GO:0009058", "GO:0044237")
query_1	FALSE	1	1009	26	1	0.0384615	0.00099108	GO:0044255	GO:BP	cellular lipid metabolic process	21100	12695	c("GO:0006629", "GO:0044237")
query_1	FALSE	1	833	26	1	0.0384615	0.00120048	GO:0044257	GO:BP	cellular protein catabolic process	21100	12697	c("GO:0030163", "GO:0044265", "GO:0044267")
query_1	FALSE	1	5766	26	8	0.307692	0.00138744	GO:0044260	GO:BP	cellular macromolecule metabolic process	21100	12699	c("GO:0043170", "GO:0044237")
query_1	FALSE	1	1152	26	1	0.0384615	0.000868056	GO:0044265	GO:BP	cellular macromolecule catabolic process	21100	12702	c("GO:0009057", "GO:0044248", "GO:0044260")
query_1	FALSE	1	4882	26	8	0.307692	0.00163867	GO:0044267	GO:BP	cellular protein metabolic process	21100	12703	c("GO:0019538", "GO:0044260")
query_1	FALSE	1	4834	26	5	0.192308	0.00103434	GO:0044085	GO:BP	cellular component biogenesis	21100	12627	GO:0071840
query_1	FALSE	1	4765	26	7	0.269231	0.00146905	GO:0044271	GO:BP	cellular nitrogen compound biosynthetic process	21100	12706	c("GO:0034641", "GO:0044249")
query_1	FALSE	1	388	26	1	0.0384615	0.00257732	GO:0044282	GO:BP	small molecule catabolic process	21100	12713	c("GO:0009056", "GO:0044281")
query_1	FALSE	1	28	26	1	0.0384615	0.0357143	GO:0044331	GO:BP	cell-cell adhesion mediated by cadherin	21100	12725	GO:0098609
query_1	FALSE	1	289	26	1	0.0384615	0.00346021	GO:0044403	GO:BP	biological process involved in symbiotic interaction	21100	12771	GO:0044419
query_1	FALSE	1	1659	26	1	0.0384615	0.000602773	GO:0044419	GO:BP	biological process involved in interspecies interaction between organisms	21100	12783	GO:0008150
query_1	FALSE	1	59	26	1	0.0384615	0.0169492	GO:0044458	GO:BP	motile cilium assembly	21100	12784	GO:0060271
query_1	FALSE	1	203	26	2	0.0769231	0.00985222	GO:0044703	GO:BP	multi-organism reproductive process	21100	12946	GO:0022414
query_1	FALSE	1	213	26	2	0.0769231	0.00938967	GO:0044706	GO:BP	multi-multicellular organism process	21100	12947	GO:0032501
query_1	FALSE	1	386	26	3	0.115385	0.00777202	GO:0044782	GO:BP	cilium organization	21100	12987	c("GO:0006996", "GO:0120036")
query_1	FALSE	1	30	26	1	0.0384615	0.0333333	GO:0044788	GO:BP	modulation by host of viral process	21100	12992	GO:0051851
query_1	FALSE	1	18	26	1	0.0384615	0.0555556	GO:0044827	GO:BP	modulation by host of viral genome replication	21100	13016	c("GO:0019079", "GO:0044788")
query_1	FALSE	1	5	26	1	0.0384615	0.2	GO:0044830	GO:BP	modulation by host of viral RNA genome replication	21100	13019	c("GO:0039694", "GO:0044827")
query_1	FALSE	1	231	26	3	0.115385	0.012987	GO:0045137	GO:BP	development of primary sexual characteristics	21100	13141	c("GO:0003006", "GO:0007275", "GO:0007548")
query_1	FALSE	1	1889	26	3	0.115385	0.00158814	GO:0045184	GO:BP	establishment of protein localization	21100	13161	c("GO:0008104", "GO:0051234")
query_1	FALSE	1	1796	26	2	0.0769231	0.00111359	GO:0044281	GO:BP	small molecule metabolic process	21100	12712	GO:0008152
query_1	FALSE	1	1658	26	4	0.153846	0.00241255	GO:0042592	GO:BP	homeostatic process	21100	11832	GO:0065008
query_1	FALSE	1	556	26	1	0.0384615	0.00179856	GO:0044057	GO:BP	regulation of system process	21100	12600	c("GO:0003008", "GO:0051239")
query_1	FALSE	1	697	26	1	0.0384615	0.00143472	GO:0043632	GO:BP	modification-dependent macromolecule catabolic process	21100	12455	GO:0044265
query_1	FALSE	1	71	26	1	0.0384615	0.0140845	GO:0042698	GO:BP	ovulation cycle	21100	11890	c("GO:0048511", "GO:0048609")
query_1	FALSE	1	1419	26	2	0.0769231	0.00140944	GO:0042981	GO:BP	regulation of apoptotic process	21100	12064	c("GO:0006915", "GO:0043067")
query_1	FALSE	1	653	26	2	0.0769231	0.00306279	GO:0043009	GO:BP	chordate embryonic development	21100	12088	GO:0009792
query_1	FALSE	1	335	26	1	0.0384615	0.00298507	GO:0043010	GO:BP	camera-type eye development	21100	12089	GO:0001654
query_1	FALSE	1	505	26	1	0.0384615	0.0019802	GO:0043065	GO:BP	positive regulation of apoptotic process	21100	12122	c("GO:0006915", "GO:0042981", "GO:0043068")
query_1	FALSE	1	1448	26	2	0.0769231	0.00138122	GO:0043067	GO:BP	regulation of programmed cell death	21100	12124	c("GO:0010941", "GO:0012501")
query_1	FALSE	1	518	26	1	0.0384615	0.0019305	GO:0043068	GO:BP	positive regulation of programmed cell death	21100	12125	c("GO:0010942", "GO:0012501", "GO:0043067")
query_1	FALSE	1	1170	26	2	0.0769231	0.0017094	GO:0043085	GO:BP	positive regulation of catalytic activity	21100	12129	c("GO:0044093", "GO:0050790")
query_1	FALSE	1	755	26	1	0.0384615	0.0013245	GO:0043086	GO:BP	negative regulation of catalytic activity	21100	12130	c("GO:0044092", "GO:0050790")
query_1	FALSE	1	367	26	1	0.0384615	0.0027248	GO:0043087	GO:BP	regulation of GTPase activity	21100	12131	GO:0051336
query_1	FALSE	1	56	26	1	0.0384615	0.0178571	GO:0043113	GO:BP	receptor clustering	21100	12150	GO:0072657
query_1	FALSE	1	255	26	1	0.0384615	0.00392157	GO:0043122	GO:BP	regulation of I-kappaB kinase/NF-kappaB signaling	21100	12154	c("GO:0007249", "GO:1902531")
query_1	FALSE	1	47	26	1	0.0384615	0.0212766	GO:0043124	GO:BP	negative regulation of I-kappaB kinase/NF-kappaB signaling	21100	12156	c("GO:0007249", "GO:0043122", "GO:1902532")
query_1	FALSE	1	444	26	1	0.0384615	0.00225225	GO:0043161	GO:BP	proteasome-mediated ubiquitin-dependent protein catabolic process	21100	12179	c("GO:0006511", "GO:0010498")
query_1	FALSE	1	3395	26	4	0.153846	0.0011782	GO:0043933	GO:BP	protein-containing complex organization	21100	12512	GO:0016043
query_1	FALSE	1	12360	26	13	0.5	0.00105178	GO:0043170	GO:BP	macromolecule metabolic process	21100	12184	GO:0071704
query_1	FALSE	1	681	26	1	0.0384615	0.00146843	GO:0043269	GO:BP	regulation of ion transport	21100	12212	c("GO:0006811", "GO:0051049")
query_1	FALSE	1	83	26	1	0.0384615	0.0120482	GO:0043367	GO:BP	CD4-positive, alpha-beta T cell differentiation	21100	12266	c("GO:0035710", "GO:0046632")
query_1	FALSE	1	49	26	1	0.0384615	0.0204082	GO:0043370	GO:BP	regulation of CD4-positive, alpha-beta T cell differentiation	21100	12269	c("GO:0043367", "GO:0046637", "GO:2000514")
query_1	FALSE	1	31	26	1	0.0384615	0.0322581	GO:0043372	GO:BP	positive regulation of CD4-positive, alpha-beta T cell differentiation	21100	12271	c("GO:0043367", "GO:0043370", "GO:0046638", "GO:2000516")
query_1	FALSE	1	137	26	2	0.0769231	0.0145985	GO:0043401	GO:BP	steroid hormone mediated signaling pathway	21100	12292	c("GO:0009755", "GO:0071383")
query_1	FALSE	1	3936	26	7	0.269231	0.00177846	GO:0043412	GO:BP	macromolecule modification	21100	12301	GO:0043170
query_1	FALSE	1	333	26	2	0.0769231	0.00600601	GO:0043414	GO:BP	macromolecule methylation	21100	12303	c("GO:0032259", "GO:0043412", "GO:0044260")
query_1	FALSE	1	174	26	1	0.0384615	0.00574713	GO:0043433	GO:BP	negative regulation of DNA-binding transcription factor activity	21100	12312	c("GO:0044092", "GO:0051090")
query_1	FALSE	1	398	26	1	0.0384615	0.00251256	GO:0043434	GO:BP	response to peptide hormone	21100	12313	c("GO:0009725", "GO:1901652")
query_1	FALSE	1	966	26	1	0.0384615	0.0010352	GO:0043436	GO:BP	oxoacid metabolic process	21100	12315	GO:0006082
query_1	FALSE	1	102	26	2	0.0769231	0.0196078	GO:0043473	GO:BP	pigmentation	21100	12348	GO:0008150
query_1	FALSE	1	276	26	1	0.0384615	0.00362319	GO:0043547	GO:BP	positive regulation of GTPase activity	21100	12395	c("GO:0043087", "GO:0051345")
query_1	FALSE	1	228	26	1	0.0384615	0.00438596	GO:0043583	GO:BP	ear development	21100	12424	GO:0007423
query_1	FALSE	1	70	26	1	0.0384615	0.0142857	GO:0043627	GO:BP	response to estrogen	21100	12450	GO:0009725
query_1	FALSE	1	402	26	1	0.0384615	0.00248756	GO:0043254	GO:BP	regulation of protein-containing complex assembly	21100	12207	c("GO:0044087", "GO:0051128", "GO:0065003")
query_1	FALSE	1	154	26	1	0.0384615	0.00649351	GO:0045580	GO:BP	regulation of T cell differentiation	21100	13312	c("GO:0030217", "GO:0045619", "GO:0050863")
query_1	FALSE	1	86	26	1	0.0384615	0.0116279	GO:0033273	GO:BP	response to vitamin	21100	9331	GO:0007584
query_1	FALSE	1	13	26	1	0.0384615	0.0769231	GO:0033148	GO:BP	positive regulation of intracellular estrogen receptor signaling pathway	21100	9275	c("GO:0030520", "GO:0033145", "GO:0033146")
query_1	FALSE	1	751	26	1	0.0384615	0.00133156	GO:0019725	GO:BP	cellular homeostasis	21100	6935	c("GO:0009987", "GO:0042592")
query_1	FALSE	1	940	26	1	0.0384615	0.00106383	GO:0019752	GO:BP	carboxylic acid metabolic process	21100	6954	GO:0043436
query_1	FALSE	1	128	26	1	0.0384615	0.0078125	GO:0019882	GO:BP	antigen processing and presentation	21100	6995	GO:0002376
query_1	FALSE	1	26	26	1	0.0384615	0.0384615	GO:0019883	GO:BP	antigen processing and presentation of endogenous antigen	21100	6996	GO:0019882
query_1	FALSE	1	686	26	1	0.0384615	0.00145773	GO:0019941	GO:BP	modification-dependent protein catabolic process	21100	7026	c("GO:0043632", "GO:0051603")
query_1	FALSE	1	874	26	1	0.0384615	0.00114416	GO:0019953	GO:BP	sexual reproduction	21100	7029	GO:0000003
query_1	FALSE	1	38	26	2	0.0769231	0.0526316	GO:0021532	GO:BP	neural tube patterning	21100	7073	c("GO:0003002", "GO:0021915")
query_1	FALSE	1	300	26	1	0.0384615	0.00333333	GO:0021700	GO:BP	developmental maturation	21100	7240	GO:0032502
query_1	FALSE	1	162	26	2	0.0769231	0.0123457	GO:0021915	GO:BP	neural tube development	21100	7451	c("GO:0007399", "GO:0035295", "GO:0043009", "GO:0060429")
query_1	FALSE	1	1642	26	3	0.115385	0.00182704	GO:0022008	GO:BP	neurogenesis	21100	7544	c("GO:0007399", "GO:0030154")
query_1	FALSE	1	444	26	2	0.0769231	0.0045045	GO:0022407	GO:BP	regulation of cell-cell adhesion	21100	7582	c("GO:0030155", "GO:0098609")
query_1	FALSE	1	288	26	2	0.0769231	0.00694444	GO:0022409	GO:BP	positive regulation of cell-cell adhesion	21100	7584	c("GO:0022407", "GO:0045785", "GO:0098609")
query_1	FALSE	1	1519	26	6	0.230769	0.00394997	GO:0022414	GO:BP	reproductive process	21100	7589	c("GO:0000003", "GO:0008150")
query_1	FALSE	1	104	26	1	0.0384615	0.00961538	GO:0022600	GO:BP	digestive system process	21100	7592	c("GO:0003008", "GO:0007586")
query_1	FALSE	1	393	26	1	0.0384615	0.00254453	GO:0019693	GO:BP	ribose phosphate metabolic process	21100	6913	c("GO:0006796", "GO:0019637", "GO:1901135")
query_1	FALSE	1	50	26	1	0.0384615	0.02	GO:0022602	GO:BP	ovulation cycle process	21100	7594	c("GO:0022414", "GO:0042698", "GO:0048511")
query_1	FALSE	1	4587	26	5	0.192308	0.00109004	GO:0022607	GO:BP	cellular component assembly	21100	7599	c("GO:0016043", "GO:0044085")
query_1	FALSE	1	126	26	2	0.0769231	0.015873	GO:0022612	GO:BP	gland morphogenesis	21100	7604	c("GO:0009887", "GO:0048732")
query_1	FALSE	1	3351	26	5	0.192308	0.00149209	GO:0023051	GO:BP	regulation of signaling	21100	7647	c("GO:0023052", "GO:0050789")
query_1	FALSE	1	6451	26	9	0.346154	0.00139513	GO:0023052	GO:BP	signaling	21100	7648	GO:0008150
query_1	FALSE	1	1715	26	3	0.115385	0.00174927	GO:0023056	GO:BP	positive regulation of signaling	21100	7652	c("GO:0023051", "GO:0023052", "GO:0048518")
query_1	FALSE	1	1356	26	1	0.0384615	0.000737463	GO:0023057	GO:BP	negative regulation of signaling	21100	7653	c("GO:0023051", "GO:0023052", "GO:0048519")
query_1	FALSE	1	886	26	1	0.0384615	0.00112867	GO:0030001	GO:BP	metal ion transport	21100	7665	GO:0006812
query_1	FALSE	1	491	26	1	0.0384615	0.00203666	GO:0030003	GO:BP	cellular cation homeostasis	21100	7667	c("GO:0006873", "GO:0055080")
query_1	FALSE	1	1525	26	4	0.153846	0.00262295	GO:0030030	GO:BP	cell projection organization	21100	7676	GO:0016043
query_1	FALSE	1	567	26	3	0.115385	0.00529101	GO:0030031	GO:BP	cell projection assembly	21100	7677	c("GO:0022607", "GO:0030030")
query_1	FALSE	1	899	26	2	0.0769231	0.00222469	GO:0030097	GO:BP	hemopoiesis	21100	7700	GO:0048534
query_1	FALSE	1	391	26	1	0.0384615	0.00255754	GO:0030098	GO:BP	lymphocyte differentiation	21100	7701	c("GO:0046649", "GO:1903131")
query_1	FALSE	1	4160	26	6	0.230769	0.00144231	GO:0030154	GO:BP	cell differentiation	21100	7716	GO:0048869
query_1	FALSE	1	740	26	2	0.0769231	0.0027027	GO:0030155	GO:BP	regulation of cell adhesion	21100	7717	c("GO:0007155", "GO:0050794")
query_1	FALSE	1	930	26	1	0.0384615	0.00107527	GO:0022603	GO:BP	regulation of anatomical structure morphogenesis	21100	7595	c("GO:0009653", "GO:0050793")
query_1	FALSE	1	731	26	1	0.0384615	0.00136799	GO:0030162	GO:BP	regulation of proteolysis	21100	7719	c("GO:0006508", "GO:0051246")
query_1	FALSE	1	943	26	1	0.0384615	0.00106045	GO:0019637	GO:BP	organophosphate metabolic process	21100	6862	c("GO:0006793", "GO:0071704")
query_1	FALSE	1	4068	26	7	0.269231	0.00172075	GO:0019438	GO:BP	aromatic compound biosynthetic process	21100	6674	c("GO:0006725", "GO:0044249")
query_1	FALSE	1	7868	26	9	0.346154	0.00114387	GO:0016043	GO:BP	cellular component organization	21100	5645	GO:0071840
query_1	FALSE	1	243	26	1	0.0384615	0.00411523	GO:0016054	GO:BP	organic acid catabolic process	21100	5654	c("GO:0006082", "GO:0044248", "GO:0044282", "GO:1901575")
query_1	FALSE	1	6983	26	7	0.269231	0.00100243	GO:0016070	GO:BP	RNA metabolic process	21100	5667	GO:0090304
query_1	FALSE	1	1604	26	1	0.0384615	0.000623441	GO:0016192	GO:BP	vesicle-mediated transport	21100	5742	GO:0006810
query_1	FALSE	1	1882	26	4	0.153846	0.0021254	GO:0016310	GO:BP	phosphorylation	21100	5776	GO:0006796
query_1	FALSE	1	640	26	1	0.0384615	0.0015625	GO:0016441	GO:BP	post-transcriptional gene silencing	21100	5807	c("GO:0010608", "GO:0010629")
query_1	FALSE	1	1461	26	1	0.0384615	0.000684463	GO:0016477	GO:BP	cell migration	21100	5816	GO:0048870
query_1	FALSE	1	849	26	1	0.0384615	0.00117786	GO:0016567	GO:BP	protein ubiquitination	21100	5844	GO:0032446
query_1	FALSE	1	505	26	3	0.115385	0.00594059	GO:0016570	GO:BP	histone modification	21100	5846	GO:0006464
query_1	FALSE	1	163	26	2	0.0769231	0.0122699	GO:0016571	GO:BP	histone methylation	21100	5847	c("GO:0006479", "GO:0016570")
query_1	FALSE	1	102	26	1	0.0384615	0.00980392	GO:0016575	GO:BP	histone deacetylation	21100	5851	c("GO:0006476", "GO:0016570")
query_1	FALSE	1	33	26	1	0.0384615	0.030303	GO:0016577	GO:BP	histone demethylation	21100	5853	c("GO:0006482", "GO:0016570")
query_1	FALSE	1	208	26	1	0.0384615	0.00480769	GO:0017157	GO:BP	regulation of exocytosis	21100	5893	c("GO:0006887", "GO:0060627", "GO:1903530")
query_1	FALSE	1	147	26	2	0.0769231	0.0136054	GO:0018022	GO:BP	peptidyl-lysine methylation	21100	5933	c("GO:0006479", "GO:0018205")
query_1	FALSE	1	5487	26	8	0.307692	0.00145799	GO:0019538	GO:BP	protein metabolic process	21100	6769	c("GO:0043170", "GO:0044238", "GO:1901564")
query_1	FALSE	1	58	26	1	0.0384615	0.0172414	GO:0018023	GO:BP	peptidyl-lysine trimethylation	21100	5934	GO:0018022
query_1	FALSE	1	373	26	1	0.0384615	0.00268097	GO:0018108	GO:BP	peptidyl-tyrosine phosphorylation	21100	6001	c("GO:0006468", "GO:0018212")
query_1	FALSE	1	4057	26	7	0.269231	0.00172541	GO:0018130	GO:BP	heterocycle biosynthetic process	21100	6014	c("GO:0044249", "GO:0046483")
query_1	FALSE	1	1285	26	4	0.153846	0.00311284	GO:0018193	GO:BP	peptidyl-amino acid modification	21100	6073	GO:0006464
query_1	FALSE	1	403	26	2	0.0769231	0.00496278	GO:0018205	GO:BP	peptidyl-lysine modification	21100	6085	GO:0018193
query_1	FALSE	1	336	26	1	0.0384615	0.00297619	GO:0018209	GO:BP	peptidyl-serine modification	21100	6089	GO:0018193
query_1	FALSE	1	376	26	1	0.0384615	0.00265957	GO:0018212	GO:BP	peptidyl-tyrosine modification	21100	6092	GO:0018193
query_1	FALSE	1	313	26	1	0.0384615	0.00319489	GO:0019058	GO:BP	viral life cycle	21100	6418	GO:0016032
query_1	FALSE	1	130	26	1	0.0384615	0.00769231	GO:0019079	GO:BP	viral genome replication	21100	6436	c("GO:0016032", "GO:0019058")
query_1	FALSE	1	331	26	1	0.0384615	0.00302115	GO:0019216	GO:BP	regulation of lipid metabolic process	21100	6468	c("GO:0006629", "GO:0080090")
query_1	FALSE	1	4048	26	6	0.230769	0.00148221	GO:0019219	GO:BP	regulation of nucleobase-containing compound metabolic process	21100	6471	c("GO:0006139", "GO:0031323", "GO:0051171", "GO:0080090")
query_1	FALSE	1	1386	26	1	0.0384615	0.000721501	GO:0019220	GO:BP	regulation of phosphate metabolic process	21100	6472	c("GO:0006796", "GO:0051174")
query_1	FALSE	1	7313	26	11	0.423077	0.00150417	GO:0019222	GO:BP	regulation of metabolic process	21100	6474	c("GO:0008152", "GO:0050789")
query_1	FALSE	1	63	26	1	0.0384615	0.015873	GO:0019229	GO:BP	regulation of vasoconstriction	21100	6478	c("GO:0042310", "GO:0097746", "GO:1903522")
query_1	FALSE	1	57	26	1	0.0384615	0.0175439	GO:0019369	GO:BP	arachidonic acid metabolic process	21100	6609	c("GO:0001676", "GO:0006690", "GO:0033559", "GO:0120254")
query_1	FALSE	1	313	26	1	0.0384615	0.00319489	GO:0018105	GO:BP	peptidyl-serine phosphorylation	21100	5998	c("GO:0006468", "GO:0018209")
query_1	FALSE	1	15	26	1	0.0384615	0.0666667	GO:0033169	GO:BP	histone H3-K9 demethylation	21100	9285	GO:0070076
query_1	FALSE	1	996	26	1	0.0384615	0.00100402	GO:0030163	GO:BP	protein catabolic process	21100	7720	c("GO:0009057", "GO:0019538", "GO:1901565")
query_1	FALSE	1	267	26	1	0.0384615	0.00374532	GO:0030217	GO:BP	T cell differentiation	21100	7756	c("GO:0030098", "GO:0042110")
query_1	FALSE	1	340	26	1	0.0384615	0.00294118	GO:0031346	GO:BP	positive regulation of cell projection organization	21100	8277	c("GO:0030030", "GO:0031344", "GO:0051130")
query_1	FALSE	1	629	26	1	0.0384615	0.00158983	GO:0031347	GO:BP	regulation of defense response	21100	8278	c("GO:0006952", "GO:0080134")
query_1	FALSE	1	1527	26	3	0.115385	0.00196464	GO:0031399	GO:BP	regulation of protein modification process	21100	8297	c("GO:0006464", "GO:0032268")
query_1	FALSE	1	500	26	1	0.0384615	0.002	GO:0031400	GO:BP	negative regulation of protein modification process	21100	8298	c("GO:0006464", "GO:0031399", "GO:0032269")
query_1	FALSE	1	999	26	2	0.0769231	0.002002	GO:0031401	GO:BP	positive regulation of protein modification process	21100	8299	c("GO:0006464", "GO:0031399", "GO:0032270")
query_1	FALSE	1	161	26	1	0.0384615	0.00621118	GO:0031503	GO:BP	protein-containing complex localization	21100	8335	GO:0051179
query_1	FALSE	1	458	26	1	0.0384615	0.00218341	GO:0031667	GO:BP	response to nutrient levels	21100	8430	GO:0009991
query_1	FALSE	1	950	26	1	0.0384615	0.00105263	GO:0032101	GO:BP	regulation of response to external stimulus	21100	8539	c("GO:0009605", "GO:0048583")
query_1	FALSE	1	384	26	2	0.0769231	0.00520833	GO:0032259	GO:BP	methylation	21100	8633	GO:0008152
query_1	FALSE	1	2370	26	4	0.153846	0.00168776	GO:0032268	GO:BP	regulation of cellular protein metabolic process	21100	8640	c("GO:0031323", "GO:0044267", "GO:0051246")
query_1	FALSE	1	970	26	2	0.0769231	0.00206186	GO:0032269	GO:BP	negative regulation of cellular protein metabolic process	21100	8641	c("GO:0031324", "GO:0032268", "GO:0044267", "GO:0051248")
query_1	FALSE	1	1406	26	2	0.0769231	0.00142248	GO:0032270	GO:BP	positive regulation of cellular protein metabolic process	21100	8642	c("GO:0031325", "GO:0032268", "GO:0044267", "GO:0051247")
query_1	FALSE	1	37	26	1	0.0384615	0.027027	GO:0032350	GO:BP	regulation of hormone metabolic process	21100	8700	c("GO:0010817", "GO:0019222", "GO:0042445")
query_1	FALSE	1	123	26	2	0.0769231	0.0162602	GO:0032355	GO:BP	response to estradiol	21100	8705	c("GO:0014070", "GO:0033993", "GO:1901700")
query_1	FALSE	1	635	26	1	0.0384615	0.0015748	GO:0031344	GO:BP	regulation of cell projection organization	21100	8275	c("GO:0030030", "GO:0051128")
query_1	FALSE	1	907	26	1	0.0384615	0.00110254	GO:0032446	GO:BP	protein modification by small protein conjugation	21100	8760	GO:0070647
query_1	FALSE	1	6317	26	10	0.384615	0.00158303	GO:0032502	GO:BP	developmental process	21100	8804	GO:0008150
query_1	FALSE	1	896	26	3	0.115385	0.00334821	GO:0032504	GO:BP	multicellular organism reproduction	21100	8805	c("GO:0000003", "GO:0032501")
query_1	FALSE	1	3600	26	6	0.230769	0.00166667	GO:0032774	GO:BP	RNA biosynthetic process	21100	9017	c("GO:0009059", "GO:0016070", "GO:0034654")
query_1	FALSE	1	597	26	1	0.0384615	0.00167504	GO:0032787	GO:BP	monocarboxylic acid metabolic process	21100	9026	GO:0019752
query_1	FALSE	1	582	26	2	0.0769231	0.00343643	GO:0032870	GO:BP	cellular response to hormone stimulus	21100	9072	c("GO:0009725", "GO:0071310", "GO:0071495")
query_1	FALSE	1	2725	26	3	0.115385	0.00110092	GO:0032879	GO:BP	regulation of localization	21100	9081	c("GO:0050789", "GO:0051179")
query_1	FALSE	1	845	26	1	0.0384615	0.00118343	GO:0032880	GO:BP	regulation of protein localization	21100	9082	c("GO:0008104", "GO:0032879")
query_1	FALSE	1	786	26	1	0.0384615	0.00127226	GO:0032940	GO:BP	secretion by cell	21100	9132	c("GO:0046903", "GO:0140352")
query_1	FALSE	1	3125	26	7	0.269231	0.00224	GO:0033036	GO:BP	macromolecule localization	21100	9203	GO:0051179
query_1	FALSE	1	1137	26	1	0.0384615	0.000879507	GO:0033043	GO:BP	regulation of organelle organization	21100	9205	c("GO:0006996", "GO:0051128")
query_1	FALSE	1	53	26	2	0.0769231	0.0377358	GO:0033059	GO:BP	cellular pigmentation	21100	9220	c("GO:0009987", "GO:0043473")
query_1	FALSE	1	73	26	1	0.0384615	0.0136986	GO:0033143	GO:BP	regulation of intracellular steroid hormone receptor signaling pathway	21100	9270	c("GO:0009966", "GO:0030518")
query_1	FALSE	1	14	26	1	0.0384615	0.0714286	GO:0033145	GO:BP	positive regulation of intracellular steroid hormone receptor signaling pathway	21100	9272	c("GO:0009967", "GO:0030518", "GO:0033143")
query_1	FALSE	1	36	26	1	0.0384615	0.0277778	GO:0033146	GO:BP	regulation of intracellular estrogen receptor signaling pathway	21100	9273	c("GO:0030520", "GO:0033143")
query_1	FALSE	1	7354	26	13	0.5	0.00176775	GO:0032501	GO:BP	multicellular organismal process	21100	8803	GO:0008150
query_1	FALSE	1	1366	26	2	0.0769231	0.00146413	GO:0030182	GO:BP	neuron differentiation	21100	7730	c("GO:0030154", "GO:0048699")
query_1	FALSE	1	194	26	1	0.0384615	0.00515464	GO:0031334	GO:BP	positive regulation of protein-containing complex assembly	21100	8265	c("GO:0043254", "GO:0044089", "GO:0051130", "GO:0065003")
query_1	FALSE	1	1964	26	4	0.153846	0.00203666	GO:0031328	GO:BP	positive regulation of cellular biosynthetic process	21100	8260	c("GO:0009891", "GO:0031325", "GO:0031326", "GO:0044249")
query_1	FALSE	1	21	26	1	0.0384615	0.047619	GO:0030277	GO:BP	maintenance of gastrointestinal epithelium	21100	7785	c("GO:0010669", "GO:0022600")
query_1	FALSE	1	119	26	1	0.0384615	0.00840336	GO:0030278	GO:BP	regulation of ossification	21100	7786	c("GO:0001503", "GO:0051239")
query_1	FALSE	1	128	26	1	0.0384615	0.0078125	GO:0030317	GO:BP	flagellated sperm motility	21100	7799	c("GO:0060285", "GO:0060294", "GO:0097722")
query_1	FALSE	1	184	26	1	0.0384615	0.00543478	GO:0030323	GO:BP	respiratory tube development	21100	7805	c("GO:0035295", "GO:0048513")
query_1	FALSE	1	180	26	1	0.0384615	0.00555556	GO:0030324	GO:BP	lung development	21100	7806	c("GO:0030323", "GO:0048513", "GO:0060541")
query_1	FALSE	1	121	26	1	0.0384615	0.00826446	GO:0030326	GO:BP	embryonic limb morphogenesis	21100	7808	c("GO:0035108", "GO:0035113")
query_1	FALSE	1	116	26	2	0.0769231	0.0172414	GO:0030518	GO:BP	intracellular steroid hormone receptor signaling pathway	21100	7888	c("GO:0030522", "GO:0043401")
query_1	FALSE	1	55	26	2	0.0769231	0.0363636	GO:0030520	GO:BP	intracellular estrogen receptor signaling pathway	21100	7889	GO:0030518
query_1	FALSE	1	264	26	2	0.0769231	0.00757576	GO:0030522	GO:BP	intracellular receptor signaling pathway	21100	7891	GO:0007165
query_1	FALSE	1	18	26	1	0.0384615	0.0555556	GO:0030540	GO:BP	female genitalia development	21100	7898	c("GO:0046660", "GO:0048806")
query_1	FALSE	1	194	26	2	0.0769231	0.0103093	GO:0030705	GO:BP	cytoskeleton-dependent intracellular transport	21100	7948	GO:0046907
query_1	FALSE	1	50	26	2	0.0769231	0.04	GO:0030850	GO:BP	prostate gland development	21100	8021	c("GO:0001655", "GO:0048608", "GO:0048732")
query_1	FALSE	1	670	26	2	0.0769231	0.00298507	GO:0030855	GO:BP	epithelial cell differentiation	21100	8026	c("GO:0030154", "GO:0060429")
query_1	FALSE	1	138	26	1	0.0384615	0.00724638	GO:0030879	GO:BP	mammary gland development	21100	8037	GO:0048732
query_1	FALSE	1	871	26	1	0.0384615	0.00114811	GO:0031329	GO:BP	regulation of cellular catabolic process	21100	8261	c("GO:0009894", "GO:0031323", "GO:0044248")
query_1	FALSE	1	77	26	1	0.0384615	0.012987	GO:0030968	GO:BP	endoplasmic reticulum unfolded protein response	21100	8080	c("GO:0007165", "GO:0034620", "GO:0034976")
query_1	FALSE	1	181	26	2	0.0769231	0.0110497	GO:0031056	GO:BP	regulation of histone modification	21100	8127	c("GO:0016570", "GO:0031399")
query_1	FALSE	1	52	26	1	0.0384615	0.0192308	GO:0031057	GO:BP	negative regulation of histone modification	21100	8128	c("GO:0016570", "GO:0031056", "GO:0031400")
query_1	FALSE	1	106	26	1	0.0384615	0.00943396	GO:0031058	GO:BP	positive regulation of histone modification	21100	8129	c("GO:0016570", "GO:0031056", "GO:0031401")
query_1	FALSE	1	81	26	2	0.0769231	0.0246914	GO:0031060	GO:BP	regulation of histone methylation	21100	8131	c("GO:0016571", "GO:0031056")
query_1	FALSE	1	24	26	1	0.0384615	0.0416667	GO:0031061	GO:BP	negative regulation of histone methylation	21100	8132	c("GO:0016571", "GO:0031057", "GO:0031060")
query_1	FALSE	1	52	26	1	0.0384615	0.0192308	GO:0031062	GO:BP	positive regulation of histone methylation	21100	8133	c("GO:0016571", "GO:0031058", "GO:0031060")
query_1	FALSE	1	37	26	1	0.0384615	0.027027	GO:0031076	GO:BP	embryonic camera-type eye development	21100	8142	c("GO:0043010", "GO:0048568")
query_1	FALSE	1	71	26	1	0.0384615	0.0140845	GO:0031146	GO:BP	SCF-dependent proteasomal ubiquitin-dependent protein catabolic process	21100	8190	GO:0043161
query_1	FALSE	1	957	26	1	0.0384615	0.00104493	GO:0031175	GO:BP	neuron projection development	21100	8213	c("GO:0048666", "GO:0120036")
query_1	FALSE	1	6004	26	11	0.423077	0.00183211	GO:0031323	GO:BP	regulation of cellular metabolic process	21100	8255	c("GO:0019222", "GO:0044237", "GO:0050794")
query_1	FALSE	1	2506	26	7	0.269231	0.0027933	GO:0031324	GO:BP	negative regulation of cellular metabolic process	21100	8256	c("GO:0009892", "GO:0031323", "GO:0044237", "GO:0048523")
query_1	FALSE	1	3271	26	5	0.192308	0.00152858	GO:0031325	GO:BP	positive regulation of cellular metabolic process	21100	8257	c("GO:0009893", "GO:0031323", "GO:0044237", "GO:0048522")
query_1	FALSE	1	4085	26	7	0.269231	0.00171359	GO:0031326	GO:BP	regulation of cellular biosynthetic process	21100	8258	c("GO:0009889", "GO:0031323", "GO:0044249")
query_1	FALSE	1	1566	26	5	0.192308	0.00319285	GO:0031327	GO:BP	negative regulation of cellular biosynthetic process	21100	8259	c("GO:0009890", "GO:0031324", "GO:0031326", "GO:0044249")
query_1	FALSE	1	682	26	1	0.0384615	0.00146628	GO:0031047	GO:BP	gene silencing by RNA	21100	8119	GO:0010629
query_1	FALSE	1	135	7	1	0.142857	0.00740741	KEGG:04723	KEGG	Retrograde endocannabinoid signaling	7559	336	KEGG:00000
query_1	FALSE	1	125	7	1	0.142857	0.008	KEGG:04915	KEGG	Estrogen signaling pathway	7559	354	KEGG:00000
query_1	FALSE	1	67	7	1	0.142857	0.0149254	KEGG:04917	KEGG	Prolactin signaling pathway	7559	356	KEGG:00000
query_1	FALSE	1	118	7	1	0.142857	0.00847458	KEGG:04919	KEGG	Thyroid hormone signaling pathway	7559	358	KEGG:00000
query_1	FALSE	1	52	7	1	0.142857	0.0192308	KEGG:04961	KEGG	Endocrine and other factor-regulated calcium reabsorption	7559	379	KEGG:00000
query_1	FALSE	1	95	7	1	0.142857	0.0105263	KEGG:04972	KEGG	Pancreatic secretion	7559	385	KEGG:00000
query_1	FALSE	1	327	7	1	0.142857	0.0030581	KEGG:05014	KEGG	Amyotrophic lateral sclerosis	7559	395	KEGG:00000
query_1	FALSE	1	272	7	1	0.142857	0.00367647	KEGG:05016	KEGG	Huntington disease	7559	396	KEGG:00000
query_1	FALSE	1	442	7	1	0.142857	0.00226244	KEGG:05022	KEGG	Pathways of neurodegeneration - multiple diseases	7559	399	KEGG:00000
query_1	FALSE	1	517	7	1	0.142857	0.00193424	KEGG:05200	KEGG	Pathways in cancer	7559	435	KEGG:00000
query_1	FALSE	1	200	7	1	0.142857	0.005	KEGG:05205	KEGG	Proteoglycans in cancer	7559	439	KEGG:00000
query_1	FALSE	1	202	7	1	0.142857	0.0049505	KEGG:05207	KEGG	Chemical carcinogenesis - receptor activation	7559	441	KEGG:00000
query_1	FALSE	1	143	7	1	0.142857	0.00699301	KEGG:05224	KEGG	Breast cancer	7559	457	KEGG:00000
query_1	FALSE	1	53	7	1	0.142857	0.0188679	KEGG:04340	KEGG	Hedgehog signaling pathway	7559	285	KEGG:00000
query_1	FALSE	1	342	7	1	0.142857	0.00292398	KEGG:04151	KEGG	PI3K-Akt signaling pathway	7559	268	KEGG:00000
query_1	FALSE	1	90	7	1	0.142857	0.0111111	KEGG:01522	KEGG	Endocrine resistance	7559	194	KEGG:00000
query_1	FALSE	1	143	7	1	0.142857	0.00699301	KEGG:01240	KEGG	Biosynthesis of cofactors	7559	188	KEGG:00000
query_1	FALSE	1	7559	7	7	1	0.000926048	KEGG:00000	KEGG	KEGG root term	7559	1	character(0)
query_1	FALSE	1	120	7	1	0.142857	0.00833333	KEGG:00230	KEGG	Purine metabolism	7559	22	KEGG:00000
query_1	FALSE	1	56	7	1	0.142857	0.0178571	KEGG:00240	KEGG	Pyrimidine metabolism	7559	24	KEGG:00000
query_1	FALSE	1	73	7	1	0.142857	0.0136986	KEGG:00983	KEGG	Drug metabolism - other enzymes	7559	155	KEGG:00000
query_1	FALSE	1	1457	7	1	0.142857	0.000686342	KEGG:01100	KEGG	Metabolic pathways	7559	179	KEGG:00000
query_1	FALSE	1	83	7	1	0.142857	0.0120482	KEGG:01232	KEGG	Nucleotide metabolism	7559	187	KEGG:00000
query_1	TRUE	0.0171258	148	16	4	0.25	0.027027	REAC:R-HSA-9018519	REAC	Estrogen-dependent gene expression	10770	820	REAC:R-HSA-8939211
query_1	FALSE	0.0753699	217	16	4	0.25	0.0184332	REAC:R-HSA-8939211	REAC	ESR-mediated signaling	10770	791	REAC:R-HSA-9006931
query_1	FALSE	0.229649	291	16	4	0.25	0.0137457	REAC:R-HSA-9006931	REAC	Signaling by Nuclear Receptors	10770	2136	REAC:R-HSA-162582
query_1	FALSE	1	59	16	1	0.0625	0.0169492	REAC:R-HSA-2142753	REAC	Arachidonic acid metabolism	10770	160	REAC:R-HSA-8978868
query_1	FALSE	1	549	16	1	0.0625	0.00182149	REAC:R-HSA-422475	REAC	Axon guidance	10770	187	REAC:R-HSA-9675108
query_1	FALSE	1	23	16	1	0.0625	0.0434783	REAC:R-HSA-5620922	REAC	BBSome-mediated cargo-targeting to cilium	10770	192	REAC:R-HSA-5620920
query_1	FALSE	1	159	16	1	0.0625	0.00628931	REAC:R-HSA-9013148	REAC	CDC42 GTPase cycle	10770	258	REAC:R-HSA-9012999
query_1	FALSE	1	51	16	1	0.0625	0.0196078	REAC:R-HSA-5620920	REAC	Cargo trafficking to the periciliary membrane	10770	298	REAC:R-HSA-5617833
query_1	FALSE	1	273	16	1	0.0625	0.003663	REAC:R-HSA-3247509	REAC	Chromatin modifying enzymes	10770	340	REAC:R-HSA-4839726
query_1	FALSE	1	273	16	1	0.0625	0.003663	REAC:R-HSA-4839726	REAC	Chromatin organization	10770	341	REAC:0000000
query_1	FALSE	1	201	16	2	0.125	0.00995025	REAC:R-HSA-5617833	REAC	Cilium Assembly	10770	346	REAC:R-HSA-1852241
query_1	FALSE	1	65	16	1	0.0625	0.0153846	REAC:R-HSA-2219530	REAC	Constitutive Signaling by Aberrant PI3K in Cancer	10770	378	REAC:R-HSA-2219528
query_1	FALSE	1	78	16	1	0.0625	0.0128205	REAC:R-HSA-5693606	REAC	DNA Double Strand Break Response	10770	420	REAC:R-HSA-5693532
query_1	FALSE	1	167	16	1	0.0625	0.00598802	REAC:R-HSA-5693532	REAC	DNA Double-Strand Break Repair	10770	421	REAC:R-HSA-73894
query_1	FALSE	1	329	16	1	0.0625	0.00303951	REAC:R-HSA-73894	REAC	DNA Repair	10770	422	REAC:0000000
query_1	FALSE	1	298	16	1	0.0625	0.0033557	REAC:R-HSA-5688426	REAC	Deubiquitination	10770	701	REAC:R-HSA-597592
query_1	FALSE	1	1116	16	2	0.125	0.00179211	REAC:R-HSA-1266738	REAC	Developmental Biology	10770	702	REAC:0000000
query_1	FALSE	1	1694	16	1	0.0625	0.000590319	REAC:R-HSA-1643685	REAC	Disease	10770	709	REAC:0000000
query_1	FALSE	1	417	16	1	0.0625	0.00239808	REAC:R-HSA-5663202	REAC	Diseases of signal transduction by growth factor receptors and second messengers	10770	734	REAC:R-HSA-1643685
query_1	FALSE	1	73	16	1	0.0625	0.0136986	REAC:R-HSA-9009391	REAC	Extra-nuclear estrogen signaling	10770	840	REAC:R-HSA-8939211
query_1	FALSE	1	169	16	1	0.0625	0.00591716	REAC:R-HSA-983231	REAC	Factors involved in megakaryocyte development and platelet production	10770	882	REAC:R-HSA-109582
query_1	FALSE	1	173	16	1	0.0625	0.00578035	REAC:R-HSA-8978868	REAC	Fatty acid metabolism	10770	886	REAC:R-HSA-556833
query_1	FALSE	1	1478	16	3	0.1875	0.00202977	REAC:R-HSA-74160	REAC	Gene expression (Transcription)	10770	982	REAC:0000000
query_1	FALSE	1	88	16	1	0.0625	0.0113636	REAC:R-HSA-8876198	REAC	RAB GEFs exchange GTP for GDP on RABs	10770	1727	REAC:R-HSA-9007101
query_1	FALSE	1	64	16	1	0.0625	0.015625	REAC:R-HSA-8873719	REAC	RAB geranylgeranylation	10770	1728	REAC:R-HSA-597592
query_1	FALSE	1	264	16	1	0.0625	0.00378788	REAC:R-HSA-5673001	REAC	RAF/MAP kinase cascade	10770	1734	REAC:R-HSA-5684996
query_1	FALSE	1	38	16	1	0.0625	0.0263158	REAC:R-HSA-8853659	REAC	RET signaling	10770	1738	REAC:R-HSA-422475
query_1	FALSE	1	449	16	1	0.0625	0.00222717	REAC:R-HSA-9012999	REAC	RHO GTPase cycle	10770	1740	REAC:R-HSA-194315
query_1	FALSE	1	1342	16	3	0.1875	0.00223547	REAC:R-HSA-73857	REAC	RNA Polymerase II Transcription	10770	1783	REAC:R-HSA-74160
query_1	FALSE	1	6	16	1	0.0625	0.166667	REAC:R-HSA-8931987	REAC	RUNX1 regulates estrogen receptor mediated transcription	10770	1809	REAC:R-HSA-8878171
query_1	FALSE	1	6	16	1	0.0625	0.166667	REAC:R-HSA-8939256	REAC	RUNX1 regulates transcription of genes involved in WNT signaling	10770	1813	REAC:R-HSA-8878171
query_1	FALSE	1	130	16	1	0.0625	0.00769231	REAC:R-HSA-8939236	REAC	RUNX1 regulates transcription of genes involved in differentiation of HSCs	10770	1814	REAC:R-HSA-8878171
query_1	FALSE	1	120	16	1	0.0625	0.00833333	REAC:R-HSA-9007101	REAC	Rab regulation of trafficking	10770	1831	REAC:R-HSA-199991
query_1	FALSE	1	77	16	1	0.0625	0.012987	REAC:R-HSA-5693565	REAC	Recruitment and ATM-mediated phosphorylation of repair and signaling proteins at DNA double strand breaks	10770	1841	REAC:R-HSA-5693606
query_1	FALSE	1	124	16	1	0.0625	0.00806452	REAC:R-HSA-381426	REAC	Regulation of Insulin-like Growth Factor (IGF) transport and uptake by Insulin-like Growth Factor Binding Proteins (IGFBPs)	10770	1866	REAC:R-HSA-392499
query_1	FALSE	1	71	16	1	0.0625	0.0140845	REAC:R-HSA-8939902	REAC	Regulation of RUNX2 expression and activity	10770	1877	REAC:R-HSA-8878166
query_1	FALSE	1	8	16	1	0.0625	0.125	REAC:R-HSA-5362798	REAC	Release of Hh-Np from the secreting cell	10770	1919	REAC:R-HSA-5358346
query_1	FALSE	1	107	16	1	0.0625	0.00934579	REAC:R-HSA-8957275	REAC	Post-translational protein phosphorylation	10770	1673	REAC:R-HSA-597592
query_1	FALSE	1	130	16	2	0.125	0.0153846	REAC:R-HSA-76005	REAC	Response to elevated platelet cytosolic Ca2+	10770	1948	REAC:R-HSA-76002
query_1	FALSE	1	176	16	1	0.0625	0.00568182	REAC:R-HSA-2990846	REAC	SUMOylation	10770	2018	REAC:R-HSA-597592
query_1	FALSE	1	24	16	1	0.0625	0.0416667	REAC:R-HSA-4090294	REAC	SUMOylation of intracellular receptors	10770	2026	REAC:R-HSA-3108232
query_1	FALSE	1	2523	16	8	0.5	0.00317083	REAC:R-HSA-162582	REAC	Signal Transduction	10770	2062	REAC:0000000
query_1	FALSE	1	54	16	1	0.0625	0.0185185	REAC:R-HSA-1236394	REAC	Signaling by ERBB4	10770	2086	REAC:R-HSA-9006934
query_1	FALSE	1	149	16	2	0.125	0.0134228	REAC:R-HSA-5358351	REAC	Signaling by Hedgehog	10770	2107	REAC:R-HSA-162582
query_1	FALSE	1	502	16	1	0.0625	0.00199203	REAC:R-HSA-9006934	REAC	Signaling by Receptor Tyrosine Kinases	10770	2149	REAC:R-HSA-162582
query_1	FALSE	1	702	16	1	0.0625	0.0014245	REAC:R-HSA-194315	REAC	Signaling by Rho GTPases	10770	2151	REAC:R-HSA-9716542
query_1	FALSE	1	717	16	1	0.0625	0.0013947	REAC:R-HSA-9716542	REAC	Signaling by Rho GTPases, Miro GTPases and RHOBTB3	10770	2152	REAC:R-HSA-162582
query_1	FALSE	1	15	16	1	0.0625	0.0666667	REAC:R-HSA-8866910	REAC	TFAP2 (AP-2) family regulates transcription of growth factors and their receptors	10770	2267	REAC:R-HSA-8864260
query_1	FALSE	1	236	16	2	0.125	0.00847458	REAC:R-HSA-8878171	REAC	Transcriptional regulation by RUNX1	10770	2389	REAC:R-HSA-212436
query_1	FALSE	1	118	16	1	0.0625	0.00847458	REAC:R-HSA-8878166	REAC	Transcriptional regulation by RUNX2	10770	2390	REAC:R-HSA-212436
query_1	FALSE	1	38	16	1	0.0625	0.0263158	REAC:R-HSA-8864260	REAC	Transcriptional regulation by the AP-2 (TFAP2) family of transcription factors	10770	2393	REAC:R-HSA-212436
query_1	FALSE	1	89	16	1	0.0625	0.011236	REAC:R-HSA-9616222	REAC	Transcriptional regulation of granulopoiesis	10770	2394	REAC:R-HSA-1266738
query_1	FALSE	1	720	16	1	0.0625	0.00138889	REAC:R-HSA-382551	REAC	Transport of small molecules	10770	2433	REAC:0000000
query_1	FALSE	1	170	16	1	0.0625	0.00588235	REAC:R-HSA-3108232	REAC	SUMO E3 ligases SUMOylate target proteins	10770	2014	REAC:R-HSA-2990846
query_1	FALSE	1	1414	16	3	0.1875	0.00212164	REAC:R-HSA-597592	REAC	Post-translational protein modification	10770	1672	REAC:R-HSA-392499
query_1	FALSE	1	258	16	2	0.125	0.00775194	REAC:R-HSA-76002	REAC	Platelet activation, signaling and aggregation	10770	1658	REAC:R-HSA-109582
query_1	FALSE	1	1221	16	3	0.1875	0.002457	REAC:R-HSA-212436	REAC	Generic Transcription Pathway	10770	984	REAC:R-HSA-73857
query_1	FALSE	1	50	16	1	0.0625	0.02	REAC:R-HSA-3214842	REAC	HDMs demethylate histones	10770	1030	REAC:R-HSA-3247509
query_1	FALSE	1	113	16	1	0.0625	0.00884956	REAC:R-HSA-5610787	REAC	Hedgehog 'off' state	10770	1046	REAC:R-HSA-5358351
query_1	FALSE	1	65	16	1	0.0625	0.0153846	REAC:R-HSA-5358346	REAC	Hedgehog ligand biogenesis	10770	1048	REAC:R-HSA-5358351
query_1	FALSE	1	672	16	3	0.1875	0.00446429	REAC:R-HSA-109582	REAC	Hemostasis	10770	1052	REAC:0000000
query_1	FALSE	1	2041	16	1	0.0625	0.000489956	REAC:R-HSA-168256	REAC	Immune System	10770	1102	REAC:0000000
query_1	FALSE	1	1094	16	1	0.0625	0.000914077	REAC:R-HSA-168249	REAC	Innate Immune System	10770	1135	REAC:R-HSA-168256
query_1	FALSE	1	27	16	1	0.0625	0.037037	REAC:R-HSA-499943	REAC	Interconversion of nucleotide di- and triphosphates	10770	1156	REAC:R-HSA-15869
query_1	FALSE	1	292	16	1	0.0625	0.00342466	REAC:R-HSA-9006925	REAC	Intracellular signaling by second messengers	10770	1197	REAC:R-HSA-162582
query_1	FALSE	1	54	16	1	0.0625	0.0185185	REAC:R-HSA-5620924	REAC	Intraflagellar transport	10770	1198	REAC:R-HSA-5617833
query_1	FALSE	1	308	16	1	0.0625	0.00324675	REAC:R-HSA-5683057	REAC	MAPK family signaling cascades	10770	1272	REAC:R-HSA-162582
query_1	FALSE	1	269	16	1	0.0625	0.00371747	REAC:R-HSA-5684996	REAC	MAPK1/MAPK3 signaling	10770	1275	REAC:R-HSA-5683057
query_1	FALSE	1	624	16	1	0.0625	0.00160256	REAC:R-HSA-199991	REAC	Membrane Trafficking	10770	1328	REAC:R-HSA-5653656
query_1	FALSE	1	2075	16	2	0.125	0.000963855	REAC:R-HSA-1430728	REAC	Metabolism	10770	1331	REAC:0000000
query_1	FALSE	1	125	16	2	0.125	0.016	REAC:R-HSA-114608	REAC	Platelet degranulation	10770	1660	REAC:R-HSA-76005
query_1	FALSE	1	728	16	1	0.0625	0.00137363	REAC:R-HSA-556833	REAC	Metabolism of lipids	10770	1343	REAC:R-HSA-1430728
query_1	FALSE	1	1944	16	3	0.1875	0.00154321	REAC:R-HSA-392499	REAC	Metabolism of proteins	10770	1349	REAC:0000000
query_1	FALSE	1	26	16	1	0.0625	0.0384615	REAC:R-HSA-5223345	REAC	Miscellaneous transport and binding events	10770	1370	REAC:R-HSA-382551
query_1	FALSE	1	59	16	1	0.0625	0.0169492	REAC:R-HSA-375165	REAC	NCAM signaling for neurite out-growth	10770	1420	REAC:R-HSA-422475
query_1	FALSE	1	42	16	1	0.0625	0.0238095	REAC:R-HSA-419037	REAC	NCAM1 interactions	10770	1421	REAC:R-HSA-375165
query_1	FALSE	1	99	16	1	0.0625	0.010101	REAC:R-HSA-199418	REAC	Negative regulation of the PI3K/AKT network	10770	1481	REAC:R-HSA-1257604
query_1	FALSE	1	574	16	1	0.0625	0.00174216	REAC:R-HSA-9675108	REAC	Nervous system development	10770	1484	REAC:R-HSA-1266738
query_1	FALSE	1	476	16	1	0.0625	0.00210084	REAC:R-HSA-6798695	REAC	Neutrophil degranulation	10770	1497	REAC:R-HSA-168249
query_1	FALSE	1	41	16	1	0.0625	0.0243902	REAC:R-HSA-383280	REAC	Nuclear Receptor transcription pathway	10770	1516	REAC:R-HSA-212436
query_1	FALSE	1	31	16	1	0.0625	0.0322581	REAC:R-HSA-1251985	REAC	Nuclear signaling by ERBB4	10770	1520	REAC:R-HSA-1236394
query_1	FALSE	1	293	16	2	0.125	0.00682594	REAC:R-HSA-1852241	REAC	Organelle biogenesis and maintenance	10770	1544	REAC:0000000
query_1	FALSE	1	39	16	1	0.0625	0.025641	REAC:R-HSA-5689896	REAC	Ovarian tumor domain proteases	10770	1551	REAC:R-HSA-5688426
query_1	FALSE	1	92	16	1	0.0625	0.0108696	REAC:R-HSA-2219528	REAC	PI3K/AKT Signaling in Cancer	10770	1572	REAC:R-HSA-5663202
query_1	FALSE	1	92	16	1	0.0625	0.0108696	REAC:R-HSA-6811558	REAC	PI5P, PP2A and IER3 Regulate PI3K/AKT Signaling	10770	1575	REAC:R-HSA-199418
query_1	FALSE	1	252	16	1	0.0625	0.00396825	REAC:R-HSA-1257604	REAC	PIP3 activates AKT signaling	10770	1577	REAC:R-HSA-9006925
query_1	FALSE	1	92	16	1	0.0625	0.0108696	REAC:R-HSA-15869	REAC	Metabolism of nucleotides	10770	1346	REAC:R-HSA-1430728
query_1	FALSE	1	718	16	1	0.0625	0.00139276	REAC:R-HSA-5653656	REAC	Vesicle-mediated transport	10770	2477	REAC:0000000
query_1	FALSE	1	10770	16	16	1	0.00148561	REAC:0000000	REAC	REACTOME root term	10770	2581	character(0)
